# Supplementary material for: Proteome-wide antigenic profiling in Ugandan cohorts identifies associations between age, exposure intensity, and responses to repeat-containing antigens in Plasmodium falciparum
Source: bioRxiv preprint, doi:10.1101/2022.06.24.497532, version 1 (2022-06-26)
Supplement: Supplemental Table 1 [file 497532_file03.xlsx]

## Sheet: Supplementary_Table1_all_hits
Peptide	gene	location of peptide in protein(start aa-end aa)	gene product	sequence
PF3D7_1016300.1-p1:transcript=PF3D7_1016300.1:gene=PF3D7_1016300:organism=Plasmodium_falciparum_3D7:gene_product=glycophorin_binding_protein:transcript_product=glycophorin_binding_protein:location=Pf3D7_10_v3:650898-653567(-):protein_length=824:sequence_SO=chromosome:SO=protein_coding_seq9	PF3D7_1016300.1-p1	(201, 262)	glycophorin_binding_protein	VSQKPSTSTRSNNEVKIRAASNQETLTSADPEGQIMREYAADPEYRKHLEIFYKILTNTDPN
PF3D7_1016300.1-p1:transcript=PF3D7_1016300.1:gene=PF3D7_1016300:organism=Plasmodium_falciparum_3D7:gene_product=glycophorin_binding_protein:transcript_product=glycophorin_binding_protein:location=Pf3D7_10_v3:650898-653567(-):protein_length=824:sequence_SO=chromosome:SO=protein_coding_seq7	PF3D7_1016300.1-p1	(151, 212)	glycophorin_binding_protein	INIGDTENQKEGKNVKKVIKKEKKKEESGKPEENKHANEASKKQEPKASKVSQKPSTSTRSN
PF3D7_1021800.1-p1:transcript=PF3D7_1021800.1:gene=PF3D7_1021800:organism=Plasmodium_falciparum_3D7:gene_product=schizont_egress_antigen-1:transcript_product=schizont_egress_antigen-1:location=Pf3D7_10_v3:896865-903608(-):protein_length=2074:sequence_SO=chromosome:SO=protein_coding_seq21	PF3D7_1021800.1-p1	(501, 562)	schizont_egress_antigen-1	NNRSNKSYKENEEDALFEVCGSLKNDDILYKDNKLNVINEDNIKEEDDKESVVHLDNDEDKK
PF3D7_1149000.1-p1:transcript=PF3D7_1149000.1:gene=PF3D7_1149000:organism=Plasmodium_falciparum_3D7:gene_product=antigen_332__DBL-like_protein:transcript_product=antigen_332__DBL-like_protein:location=Pf3D7_11_v3:1950210-1968726(+):protein_length=6093:sequence_SO=chromosome:SO=protein_coding_seq108	PF3D7_1149000.1-p1	(2676, 2737)	antigen_332__DBL-like_protein	EDGSVIQEVVEDGSVTEEIVQENGSVTEEIVEEEGSVNEEVEEEVSVSGEVDETEYVTEEVE
PF3D7_1149000.1-p1:transcript=PF3D7_1149000.1:gene=PF3D7_1149000:organism=Plasmodium_falciparum_3D7:gene_product=antigen_332__DBL-like_protein:transcript_product=antigen_332__DBL-like_protein:location=Pf3D7_11_v3:1950210-1968726(+):protein_length=6093:sequence_SO=chromosome:SO=protein_coding_seq109	PF3D7_1149000.1-p1	(2701, 2762)	antigen_332__DBL-like_protein	VTEEIVEEEGSVNEEVEEEVSVSGEVDETEYVTEEVEEEGSVVEEIVEEEGSVSGEVDETEY
HB3var16_seq82	HB3var16	(2026, 2087)	var	DTILEDLDKPFNEPYYYDMYDDDIYYDVNDHDTSTVDSNAMDIPSKVQIEMDINTKLVKEKY
PF3D7_0104300.1-p1:transcript=PF3D7_0104300.1:gene=PF3D7_0104300:organism=Plasmodium_falciparum_3D7:gene_product=ubiquitin_carboxyl-terminal_hydrolase_1__putative:transcript_product=ubiquitin_carboxyl-terminal_hydrolase_1__putative:location=Pf3D7_01_v3:190269-201230(+):protein_length=3499:sequence_SO=chromosome:SO=protein_coding_seq58	PF3D7_0104300.1-p1	(1426, 1487)	PF3D7_0104300.1-p1ubiquitin_carboxyl-terminal_hydrolase_1__putative	YLKKNYDQENEKDNEYENEKSYKKSTRPYYEEDHTPYRKQNIQDWSSYTKDKENKLNMDDDI
PF3D7_0104300.1-p1:transcript=PF3D7_0104300.1:gene=PF3D7_0104300:organism=Plasmodium_falciparum_3D7:gene_product=ubiquitin_carboxyl-terminal_hydrolase_1__putative:transcript_product=ubiquitin_carboxyl-terminal_hydrolase_1__putative:location=Pf3D7_01_v3:190269-201230(+):protein_length=3499:sequence_SO=chromosome:SO=protein_coding_seq59	PF3D7_0104300.1-p1	(1451, 1512)	PF3D7_0104300.1-p1ubiquitin_carboxyl-terminal_hydrolase_1__putative	TRPYYEEDHTPYRKQNIQDWSSYTKDKENKLNMDDDINMNKGNDQDVNRTYKNEKNKEEDKY
PF3D7_0210600.1-p1:transcript=PF3D7_0210600.1:gene=PF3D7_0210600:organism=Plasmodium_falciparum_3D7:gene_product=conserved_Plasmodium_protein__unknown_function:transcript_product=conserved_Plasmodium_protein__unknown_function:location=Pf3D7_02_v3:432041-434086(-):protein_length=446:sequence_SO=chromosome:SO=protein_coding_seq17	PF3D7_0210600.1-p1	(401, 462)	PF3D7_0210600.1-p1conserved_Plasmodium_protein__unknown_function	ILEINKTLSRSLSNNSMKNKYLDKKKKVEVLSDMDNEENYMNSGDLGPVFKDMSKNMYNYSD
PF3D7_1442600.1-p1:transcript=PF3D7_1442600.1:gene=PF3D7_1442600:organism=Plasmodium_falciparum_3D7:gene_product=TRAP-like_protein:transcript_product=TRAP-like_protein:location=Pf3D7_14_v3:1730087-1740916(+):protein_length=3543:sequence_SO=chromosome:SO=protein_coding_seq61	PF3D7_1442600.1-p1	(1501, 1562)	TRAP-like_protein	IPEKNGENKNSQQNSDHNIMTEKNGENKNSQQNSDHNIMTEEYEKNKNSQENTDDNIMTEGY
PF3D7_1442600.1-p1:transcript=PF3D7_1442600.1:gene=PF3D7_1442600:organism=Plasmodium_falciparum_3D7:gene_product=TRAP-like_protein:transcript_product=TRAP-like_protein:location=Pf3D7_14_v3:1730087-1740916(+):protein_length=3543:sequence_SO=chromosome:SO=protein_coding_seq60	PF3D7_1442600.1-p1	(1476, 1537)	TRAP-like_protein	NSEDNIMTEEYGKNKSPQENIDDNIIPEKNGENKNSQQNSDHNIMTEKNGENKNSQQNSDHN
HB3var03_seq58	HB3var03	(1426, 1487)	var	QNALTGPTSKYQYNNVKFSDKSTTLEKFAQTPQFLRWFTEWSDEFCRERKKKEEKVGSACKN
HB3var03_seq59	HB3var03	(1451, 1512)	var	EKFAQTPQFLRWFTEWSDEFCRERKKKEEKVGSACKNDYDGCENTKDNGNGKCVTACKAYKE
PF3D7_0425700.1-p1:transcript=PF3D7_0425700.1:gene=PF3D7_0425700:organism=Plasmodium_falciparum_3D7:gene_product=rifin:transcript_product=rifin:location=Pf3D7_04_v3:1152504-1153633(-):protein_length=324:sequence_SO=chromosome:SO=protein_coding_seq3	PF3D7_0425700.1-p1	(51, 112)	rifin	DPEMKSVMQQFHDRTKQRFQEYDEMLQEKRQICKDTCDKEIQKIILKDKIEKELNEKFSALH
PF3D7_0526600.1-p1:transcript=PF3D7_0526600.1:gene=PF3D7_0526600:organism=Plasmodium_falciparum_3D7:gene_product=conserved_Plasmodium_protein__unknown_function:transcript_product=conserved_Plasmodium_protein__unknown_function:location=Pf3D7_05_v3:1101203-1114777(+):protein_length=4524:sequence_SO=chromosome:SO=protein_coding_seq172	PF3D7_0526600.1-p1	(4276, 4337)	PF3D7_0526600.1-p1conserved_Plasmodium_protein__unknown_function	DKEGRNILKDFYSENESIANYSEEKKVEKNNKNDNKNDNKNDNKNDNKNDNKNDKHNKHNKH
PF3D7_0412000.1-p1:transcript=PF3D7_0412000.1:gene=PF3D7_0412000:organism=Plasmodium_falciparum_3D7:gene_product=conserved_Plasmodium_protein__unknown_function:transcript_product=conserved_Plasmodium_protein__unknown_function:location=Pf3D7_04_v3:536774-539110(+):protein_length=778:sequence_SO=chromosome:SO=protein_coding_seq28	PF3D7_0412000.1-p1	(676, 737)	PF3D7_0412000.1-p1conserved_Plasmodium_protein__unknown_function	NIKDNEHENNQDNIKDNKHDHIQDNIKDNKHDHIQDNIKDNKHDHNQANIKDSVPLNGQTGV
PFIT_bin04300.1-p1:transcript=PFIT_bin04300.1:gene=PFIT_bin04300:organism=Plasmodium_falciparum_IT:gene_product=erythrocyte_membrane_protein_1__PfEMP1:transcript_product=erythrocyte_membrane_protein_1__PfEMP1:location=PfIT_bin_v3_archived_contig_10:19019-26919(+):protein_length=2256:sequence_SO=random_sequence:SO=protein_coding_seq47	PFIT_bin04300.1-p1	(1151, 1212)	var	DTQSGTAPTQNDTVKKAFFGENGASKDAKPATPDTAATQKGTYQEKYDYSKVVLKDDDDQSG
PF3D7_0617600.1-p1:transcript=PF3D7_0617600.1:gene=PF3D7_0617600:organism=Plasmodium_falciparum_3D7:gene_product=stevor:transcript_product=stevor:location=Pf3D7_06_v3:738259-739265(-):protein_length=302:sequence_SO=chromosome:SO=protein_coding_seq4	PF3D7_0617600.1-p1	(76, 137)	Stevor	EAIKKYQKIHEPYEQLQELVEKKGTKPVGEHGTEPMSTIEKELLETYEKMFGDKKDIMLKSG
PF3D7_1373500.1-p1:transcript=PF3D7_1373500.1:gene=PF3D7_1373500:organism=Plasmodium_falciparum_3D7:gene_product=erythrocyte_membrane_protein_1__PfEMP1:transcript_product=erythrocyte_membrane_protein_1__PfEMP1:location=Pf3D7_13_v3:2884786-2892340(-):protein_length=2223:sequence_SO=chromosome:SO=protein_coding_seq12	PF3D7_1373500.1-p1	(276, 337)	var	FRTTCSDGKSQSQANKYCRCDGDQPGHDKSKAGKANDDVNIVPTYFDYVPQYLRWFEEWAED
PF3D7_1373500.1-p1:transcript=PF3D7_1373500.1:gene=PF3D7_1373500:organism=Plasmodium_falciparum_3D7:gene_product=erythrocyte_membrane_protein_1__PfEMP1:transcript_product=erythrocyte_membrane_protein_1__PfEMP1:location=Pf3D7_13_v3:2884786-2892340(-):protein_length=2223:sequence_SO=chromosome:SO=protein_coding_seq14	PF3D7_1373500.1-p1	(326, 387)	var	QYLRWFEEWAEDFCRKKKKKLKDVKRNCRDETVKYCSGNGYDCTKTIYKKGKLVIGSECTKC
PF3D7_0307700.1-p1:transcript=PF3D7_0307700.1:gene=PF3D7_0307700:organism=Plasmodium_falciparum_3D7:gene_product=conserved_Plasmodium_protein__unknown_function:transcript_product=conserved_Plasmodium_protein__unknown_function:location=Pf3D7_03_v3:328787-335269(-):protein_length=1826:sequence_SO=chromosome:SO=protein_coding_seq24	PF3D7_0307700.1-p1	(576, 637)	PF3D7_0307700.1-p1conserved_Plasmodium_protein__unknown_function	EDYPEYYNDVPSRYNDYYNRVSNRNDKKNELNENSYYYKNVKYNEKNMFMENNDDKENEPYA
IGHvar06_seq42	IGHvar06	(1026, 1087)	var	NGEVVGLPLLRQDVSQEDDPEQKKLNDGTIPEEFKRQMFYTLGDYKDILFSGSKDDNTKSST
IGHvar06_seq44	IGHvar06	(1076, 1137)	var	SGSKDDNTKSSTYNDILKGDKVIQERESKIQEQLKSFFSNSGKGQPSDKKSASDKDPKEWWQ
PFIT_1465600.1-p1:transcript=PFIT_1465600.1:gene=PFIT_1465600:organism=Plasmodium_falciparum_IT:gene_product=conserved_Plasmodium_membrane_protein__unknown_function:transcript_product=conserved_Plasmodium_membrane_protein__unknown_function:location=PfIT_14_v3:2630901-2641234(+):protein_length=3256:sequence_SO=chromosome:SO=protein_coding_seq10	PFIT_1465600.1-p1	(226, 287)	PFIT_1465600.1-p1conserved_Plasmodium_membrane_protein__unknown_function	KNNPSENVSYINISQKEDQNTVCFDLNLSDLKNDQKKKKENSGYSYYFKNKYDTDENVTEKK
PF3D7_0613700.1-p1:transcript=PF3D7_0613700.1:gene=PF3D7_0613700:organism=Plasmodium_falciparum_3D7:gene_product=syntaxin_binding_protein__putative:transcript_product=syntaxin_binding_protein__putative:location=Pf3D7_06_v3:559349-561460(-):protein_length=703:sequence_SO=chromosome:SO=protein_coding_seq13	PF3D7_0613700.1-p1	(301, 362)	PF3D7_0613700.1-p1syntaxin_binding_protein__putative	EQPNEHIYSNTCNDTYYDDKNTEMGGEGKKKKNKKKKNIDAHTVLFEITNNDQKKEEKEALL
PF3D7_0613700.1-p1:transcript=PF3D7_0613700.1:gene=PF3D7_0613700:organism=Plasmodium_falciparum_3D7:gene_product=syntaxin_binding_protein__putative:transcript_product=syntaxin_binding_protein__putative:location=Pf3D7_06_v3:559349-561460(-):protein_length=703:sequence_SO=chromosome:SO=protein_coding_seq14	PF3D7_0613700.1-p1	(326, 387)	PF3D7_0613700.1-p1syntaxin_binding_protein__putative	GEGKKKKNKKKKNIDAHTVLFEITNNDQKKEEKEALLSEEDHLWSSYRHHHIQDVNEIIKNE
PF3D7_1324100.1-p1:transcript=PF3D7_1324100.1:gene=PF3D7_1324100:organism=Plasmodium_falciparum_3D7:gene_product=conserved_Plasmodium_membrane_protein__unknown_function:transcript_product=conserved_Plasmodium_membrane_protein__unknown_function:location=Pf3D7_13_v3:997721-999262(+):protein_length=513:sequence_SO=chromosome:SO=protein_coding_seq5	PF3D7_1324100.1-p1	(101, 162)	PF3D7_1324100.1-p1conserved_Plasmodium_membrane_protein__unknown_function	NNISKNLNNHLSQGVGNECVKNLITQVSYSHLFTILKNILTYLPFSINDYLIGTLELKEVID
PF3D7_1415500.1-p1:transcript=PF3D7_1415500.1:gene=PF3D7_1415500:organism=Plasmodium_falciparum_3D7:gene_product=conserved_Plasmodium_membrane_protein__unknown_function:transcript_product=conserved_Plasmodium_membrane_protein__unknown_function:location=Pf3D7_14_v3:624486-628250(-):protein_length=1148:sequence_SO=chromosome:SO=protein_coding_seq24	PF3D7_1415500.1-p1	(576, 637)	PF3D7_1415500.1-p1conserved_Plasmodium_membrane_protein__unknown_function	DNMNNMKNMDNMNNMKNMDNMKNMDNMDNMDNMNNEENITNEKNEQNTNDALLLNNNKPEND
PF3D7_1200400.1-p1:transcript=PF3D7_1200400.1:gene=PF3D7_1200400:organism=Plasmodium_falciparum_3D7:gene_product=erythrocyte_membrane_protein_1__PfEMP1:transcript_product=erythrocyte_membrane_protein_1__PfEMP1:location=Pf3D7_12_v3:32703-41940(+):protein_length=2860:sequence_SO=chromosome:SO=protein_coding_seq112	PF3D7_1200400.1-p1	(2776, 2837)	var	SIQIHMDNPKPINQFTNMDTILEDLEKYNEPYYDVQDDIYYDVNDHDASTVDSNNMDVPSKV
PF3D7_1200400.1-p1:transcript=PF3D7_1200400.1:gene=PF3D7_1200400:organism=Plasmodium_falciparum_3D7:gene_product=erythrocyte_membrane_protein_1__PfEMP1:transcript_product=erythrocyte_membrane_protein_1__PfEMP1:location=Pf3D7_12_v3:32703-41940(+):protein_length=2860:sequence_SO=chromosome:SO=protein_coding_seq110	PF3D7_1200400.1-p1	(2726, 2787)	var	HKWLDRHRDMCEKWKNNHERLAKLKEEWENETHSGNTHPSDSNKTLNTDVSIQIHMDNPKPI
PF3D7_1200400.1-p1:transcript=PF3D7_1200400.1:gene=PF3D7_1200400:organism=Plasmodium_falciparum_3D7:gene_product=erythrocyte_membrane_protein_1__PfEMP1:transcript_product=erythrocyte_membrane_protein_1__PfEMP1:location=Pf3D7_12_v3:32703-41940(+):protein_length=2860:sequence_SO=chromosome:SO=protein_coding_seq111	PF3D7_1200400.1-p1	(2751, 2812)	var	EEWENETHSGNTHPSDSNKTLNTDVSIQIHMDNPKPINQFTNMDTILEDLEKYNEPYYDVQD
PFCLINvar33_seq108	PFCLINvar33	(2676, 2737)	var	HDRDLYSGEEISYNIHMSTNSMDDPKYVSNNVYSGIDLINDTLSGNKHIDIYDEVLKRKENE
PFCLINvar33_seq109	PFCLINvar33	(2701, 2762)	var	KYVSNNVYSGIDLINDTLSGNKHIDIYDEVLKRKENELFGTNHVKQTSIHSVAKNTYSDDAI
PFCLINvar33_seq103	PFCLINvar33	(2551, 2612)	var	GHYYEDTTDITSSESEYEEMEINDIYAPNSPKYKTLIEVVLEPSKGNGNTPSKGDGNTLGDD
PFCLINvar33_seq104	PFCLINvar33	(2576, 2637)	var	YAPNSPKYKTLIEVVLEPSKGNGNTPSKGDGNTLGDDMVPTTNTFTDEEWNELKQDFISQYI
PFIT_0627000.1-p1:transcript=PFIT_0627000.1:gene=PFIT_0627000:organism=Plasmodium_falciparum_IT:gene_product=HECT-domain_(ubiquitin-transferase)__putative:transcript_product=HECT-domain_(ubiquitin-transferase)__putative:location=PfIT_06_v3:1056613-1087464(-):protein_length=10283:sequence_SO=chromosome:SO=protein_coding_seq42	PFIT_0627000.1-p1	(1026, 1087)	PFIT_0627000.1-p1HECT-domain_(ubiquitin-transferase)__putative	KYHVRKYREYIYEWNQTSDSQICALSILKLYLKNNLDVNDGRIEHNEKFYCLSERLIKSFLK
PF3D7_1200400.1-p1:transcript=PF3D7_1200400.1:gene=PF3D7_1200400:organism=Plasmodium_falciparum_3D7:gene_product=erythrocyte_membrane_protein_1__PfEMP1:transcript_product=erythrocyte_membrane_protein_1__PfEMP1:location=Pf3D7_12_v3:32703-41940(+):protein_length=2860:sequence_SO=chromosome:SO=protein_coding_seq62	PF3D7_1200400.1-p1	(1526, 1587)	var	GWKDQYKKQSKKFTTDKEKKEYKDDPDLDGATYAYQYLSKKLKPICQNGTTTDKCDYNCMEN
IT4var25_seq83	IT4var25	(2051, 2112)	var	QIHMDNPKTTNEFTYVDSNPNQVDDTYVDSNPDNSSMDTILEDLEKYNEPYYDVQDDIYYDV
IT4var25_seq82	IT4var25	(2026, 2087)	var	WENETHSGNTHPSDSNKTLNTDVSIQIHMDNPKTTNEFTYVDSNPNQVDDTYVDSNPDNSSM
PF3D7_0511500.1-p1:transcript=PF3D7_0511500.1:gene=PF3D7_0511500:organism=Plasmodium_falciparum_3D7:gene_product=RNA_pseudouridylate_synthase__putative:transcript_product=RNA_pseudouridylate_synthase__putative:location=Pf3D7_05_v3:486602-516787(+):protein_length=10061:sequence_SO=chromosome:SO=protein_coding_seq88	PF3D7_0511500.1-p1	(2176, 2237)	PF3D7_0511500.1-p1RNA_pseudouridylate_synthase__putative	YVSTNSSNSDDDDDDGDNNNNKNDNMDDDSYYERNSIFGDNNDDKDDDDDDSYLDNFSDSDG
PF3D7_0511500.1-p1:transcript=PF3D7_0511500.1:gene=PF3D7_0511500:organism=Plasmodium_falciparum_3D7:gene_product=RNA_pseudouridylate_synthase__putative:transcript_product=RNA_pseudouridylate_synthase__putative:location=Pf3D7_05_v3:486602-516787(+):protein_length=10061:sequence_SO=chromosome:SO=protein_coding_seq89	PF3D7_0511500.1-p1	(2201, 2262)	PF3D7_0511500.1-p1RNA_pseudouridylate_synthase__putative	MDDDSYYERNSIFGDNNDDKDDDDDDSYLDNFSDSDGKKNDPSYKYDIENNEEMKFYKDLEL
PFIT_0722000.1-p1:transcript=PFIT_0722000.1:gene=PFIT_0722000:organism=Plasmodium_falciparum_IT:gene_product=conserved_Plasmodium_protein__unknown_function:transcript_product=conserved_Plasmodium_protein__unknown_function:location=PfIT_07_v3:977521-984576(+):protein_length=2201:sequence_SO=chromosome:SO=protein_coding_seq30	PFIT_0722000.1-p1	(726, 787)	PFIT_0722000.1-p1conserved_Plasmodium_protein__unknown_function	IVNDKIVNDKIVNNKIVNDKIVNDKIVNDKIVNDKIVNDKIVNDESNKFYRNKPSSNIINND
PFIT_0722000.1-p1:transcript=PFIT_0722000.1:gene=PFIT_0722000:organism=Plasmodium_falciparum_IT:gene_product=conserved_Plasmodium_protein__unknown_function:transcript_product=conserved_Plasmodium_protein__unknown_function:location=PfIT_07_v3:977521-984576(+):protein_length=2201:sequence_SO=chromosome:SO=protein_coding_seq32	PFIT_0722000.1-p1	(776, 837)	PFIT_0722000.1-p1conserved_Plasmodium_protein__unknown_function	RNKPSSNIINNDDDKKKKMVPSKEDIFEKKWEEKKTFEDKNKMNRKTINFIENNNKNNLNIE
PF3D7_1450700.1-p1:transcript=PF3D7_1450700.1:gene=PF3D7_1450700:organism=Plasmodium_falciparum_3D7:gene_product=conserved_Plasmodium_protein__unknown_function:transcript_product=conserved_Plasmodium_protein__unknown_function:location=Pf3D7_14_v3:2078488-2080350(+):protein_length=620:sequence_SO=chromosome:SO=protein_coding_seq11	PF3D7_1450700.1-p1	(251, 312)	PF3D7_1450700.1-p1conserved_Plasmodium_protein__unknown_function	SNDSSYISDYSSDDSYISNNSTDSSSNSKMSSDSSSNSKMSSGSSSNSKVSSDSRSNSKKSR
PFCLINvar60_seq63	PFCLINvar60	(1551, 1612)	var	INEKGYIDDCNESKQKDFHDNPKKDEKYAFRNYPYEHETKCECKEEPPPEPAEDNRGRSKTG
PF3D7_1356800.1-p1:transcript=PF3D7_1356800.1:gene=PF3D7_1356800:organism=Plasmodium_falciparum_3D7:gene_product=serine/threonine_protein_kinase__putative:transcript_product=serine/threonine_protein_kinase__putative:location=Pf3D7_13_v3:2249587-2261721(+):protein_length=4044:sequence_SO=chromosome:SO=protein_coding_seq82	PF3D7_1356800.1-p1	(2026, 2087)	PF3D7_1356800.1-p1serine/threonine_protein_kinase__putative	VHKECSTDLIKQNKCSKINLKLKDTYIDEKIRKDQHVGDLKFTDGKGEEQKNDTQINLKNDE
PF3D7_0730900.1-p1:transcript=PF3D7_0730900.1:gene=PF3D7_0730900:organism=Plasmodium_falciparum_3D7:gene_product=EMP1-trafficking_protein:transcript_product=EMP1-trafficking_protein:location=Pf3D7_07_v3:1325375-1331813(+):protein_length=2110:sequence_SO=chromosome:SO=protein_coding_seq8	PF3D7_0730900.1-p1	(176, 237)	PF3D7_0730900.1-p1EMP1-trafficking_protein	LKSVISGFTETCNDVKEAVKPNIDTIKDTLSSGITNIDKRVVGNVSSIINKITNADEEDSEE
PFIT_1339500.1-p1:transcript=PFIT_1339500.1:gene=PFIT_1339500:organism=Plasmodium_falciparum_IT:gene_product=nucleolar_complex_protein_2__putative:transcript_product=nucleolar_complex_protein_2__putative:location=PfIT_13_v3:1559701-1562532(+):protein_length=943:sequence_SO=chromosome:SO=protein_coding_seq34	PFIT_1339500.1-p1	(826, 887)	PFIT_1339500.1-p1nucleolar_complex_protein_2__putative	ENYENSYLNKIKAKLSGLQHIKNQNNQNDDAYGYHHHSRDQDTNHNNKEIKNFKNKDRKRKA
PFIT_0409600.1-p1:transcript=PFIT_0409600.1:gene=PFIT_0409600:organism=Plasmodium_falciparum_IT:gene_product=conserved_Plasmodium_protein__unknown_function:transcript_product=conserved_Plasmodium_protein__unknown_function:location=PfIT_04_v3:527264-531988(+):protein_length=1574:sequence_SO=chromosome:SO=protein_coding_seq25	PFIT_0409600.1-p1	(601, 662)	PFIT_0409600.1-p1conserved_Plasmodium_protein__unknown_function	YDNKNDQLDIQKDCSFLSAEEFDEDILKNGEMKNMSDIDETEGMDDIKDMDELEDVNDEEDM
PF3D7_0731100.1-p1:transcript=PF3D7_0731100.1:gene=PF3D7_0731100:organism=Plasmodium_falciparum_3D7:gene_product=EMP1-trafficking_protein:transcript_product=EMP1-trafficking_protein:location=Pf3D7_07_v3:1338959-1341790(+):protein_length=890:sequence_SO=chromosome:SO=protein_coding_seq15	PF3D7_0731100.1-p1	(351, 412)	PF3D7_0731100.1-p1EMP1-trafficking_protein	SGMTFNNFTNMKGDVNGNEMGLRMQQGLFDSGNFNNQGYQKSDVNLKIPSGTFFNNPENIRG
DD2var50_seq40	DD2var50	(976, 1037)	var	EAEFIKKKYQENKDNSGQNGKNAKNGLRKDQATTCRAIRYSFADIGDIIKGTDMWDEDGGEK
PFIT_1303000.1-p1:transcript=PFIT_1303000.1:gene=PFIT_1303000:organism=Plasmodium_falciparum_IT:gene_product=conserved_Plasmodium_protein__unknown_function:transcript_product=conserved_Plasmodium_protein__unknown_function:location=PfIT_13_v3:154453-182025(-):protein_length=9190:sequence_SO=chromosome:SO=protein_coding_seq18	PFIT_1303000.1-p1	(426, 487)	PFIT_1303000.1-p1conserved_Plasmodium_protein__unknown_function	KKKKNEDIKGDVKYDVKGDVKDDVKDDVKGDIKYNVKGDVKDDVKYNVNHVDNFVNDQTNNS
PFIT_0932600.1-p1:transcript=PFIT_0932600.1:gene=PFIT_0932600:organism=Plasmodium_falciparum_IT:gene_product=protein_MAM3__putative:transcript_product=protein_MAM3__putative:location=PfIT_09_v3:1257988-1262564(-):protein_length=1260:sequence_SO=chromosome:SO=protein_coding_seq27	PFIT_0932600.1-p1	(651, 712)	PFIT_0932600.1-p1protein_MAM3__putative	SNNNNIENVDNIENVDNIENVENVDNIENVDNIENVENIENVENVDNNNNDEQHKDVQSGEE
PFIT_0113900.1-p1:transcript=PFIT_0113900.1:gene=PFIT_0113900:organism=Plasmodium_falciparum_IT:gene_product=surface-associated_interspersed_protein_8.3_(SURFIN_8.3):transcript_product=surface-associated_interspersed_protein_8.3_(SURFIN_8.3):location=PfIT_01_v3:520852-522333(+):protein_length=395:sequence_SO=chromosome:SO=protein_coding_seq8	PFIT_0113900.1-p1	(176, 237)	Surfin	YTINDNCSLRKPHILFQLLECHEEKKKEEDPEIVEDGDGKKPEDSKNIVKSIHGPSFRTTYN
DD2var01a_seq62	DD2var01a	(1526, 1587)	var	LTKYVTDTDNKRKIKNDYSYDKVNQSQNGNPSLEEFAAKPQFLRWMIEWGEEFCAERQKKEN
PF3D7_1223400.1-p1:transcript=PF3D7_1223400.1:gene=PF3D7_1223400:organism=Plasmodium_falciparum_3D7:gene_product=phospholipid-transporting_ATPase__putative:transcript_product=phospholipid-transporting_ATPase__putative:location=Pf3D7_12_v3:941125-946745(+):protein_length=1618:sequence_SO=chromosome:SO=protein_coding_seq52	PF3D7_1223400.1-p1	(1276, 1337)	PF3D7_1223400.1-p1phospholipid-transporting_ATPase__putative	NIKSTSNLIREFNSILHNIESYVLFFDNIIIQNCIKYIPNAFVDFAANARAVVCCRCSPIEK
PFIT_0100700.1-p1:transcript=PFIT_0100700.1:gene=PFIT_0100700:organism=Plasmodium_falciparum_IT:gene_product=ring-infected_erythrocyte_surface_antigen:transcript_product=ring-infected_erythrocyte_surface_antigen:location=PfIT_01_v3:41524-44660(+):protein_length=976:sequence_SO=chromosome:SO=protein_coding_seq37	PFIT_0100700.1-p1	(901, 962)	ring-infected_erythrocyte_surface_antigen	EENVEHDAEENVEHDAEENAEENVEENVEEVEENVEENVEENVEENVEENVEENVEENVEEY
PFIT_0100700.1-p1:transcript=PFIT_0100700.1:gene=PFIT_0100700:organism=Plasmodium_falciparum_IT:gene_product=ring-infected_erythrocyte_surface_antigen:transcript_product=ring-infected_erythrocyte_surface_antigen:location=PfIT_01_v3:41524-44660(+):protein_length=976:sequence_SO=chromosome:SO=protein_coding_seq36	PFIT_0100700.1-p1	(876, 937)	ring-infected_erythrocyte_surface_antigen	EMKNQNENVPEHVQHNAEANVEHDAEENVEHDAEENVEHDAEENAEENVEENVEEVEENVEE
PFIT_0100700.1-p1:transcript=PFIT_0100700.1:gene=PFIT_0100700:organism=Plasmodium_falciparum_IT:gene_product=ring-infected_erythrocyte_surface_antigen:transcript_product=ring-infected_erythrocyte_surface_antigen:location=PfIT_01_v3:41524-44660(+):protein_length=976:sequence_SO=chromosome:SO=protein_coding_seq38	PFIT_0100700.1-p1	(926, 987)	ring-infected_erythrocyte_surface_antigen	DAEENAEENVEENVEEVEENVEENVEENVEENVEENVEENVEENVEEYDEENVEEHNEEYDE
PF3D7_0833400.1-p1:transcript=PF3D7_0833400.1:gene=PF3D7_0833400:organism=Plasmodium_falciparum_3D7:gene_product=rifin:transcript_product=rifin:location=Pf3D7_08_v3:1432696-1433932(+):protein_length=340:sequence_SO=chromosome:SO=protein_coding_seq3	PF3D7_0833400.1-p1	(51, 112)	rifin	NYDNDPQMKAVMENYNRQTSDRFKEYDERMKTTRQKCKDKCDKEIQNIILKDKLEKELAEKF
PF3D7_0833400.1-p1:transcript=PF3D7_0833400.1:gene=PF3D7_0833400:organism=Plasmodium_falciparum_3D7:gene_product=rifin:transcript_product=rifin:location=Pf3D7_08_v3:1432696-1433932(+):protein_length=340:sequence_SO=chromosome:SO=protein_coding_seq2	PF3D7_0833400.1-p1	(26, 87)	rifin	KNTTHHTPKISTTRLLCECELYAPSNYDNDPQMKAVMENYNRQTSDRFKEYDERMKTTRQKC
PF3D7_0321800.1-p1:transcript=PF3D7_0321800.1:gene=PF3D7_0321800:organism=Plasmodium_falciparum_3D7:gene_product=WD_repeat-containing_protein__putative:transcript_product=WD_repeat-containing_protein__putative:location=Pf3D7_03_v3:912916-921036(+):protein_length=2706:sequence_SO=chromosome:SO=protein_coding_seq71	PF3D7_0321800.1-p1	(1751, 1812)	PF3D7_0321800.1-p1WD_repeat-containing_protein__putative	DDNYCQNERCDEPWGHPNKQSNFVKKSKIRRKCKKEVTEICDDKKEEQISSNDDSFFDNQSS
PF3D7_1239900.1-p1:transcript=PF3D7_1239900.1:gene=PF3D7_1239900:organism=Plasmodium_falciparum_3D7:gene_product=vacuolar_protein_sorting-associated_protein_16__putative:transcript_product=vacuolar_protein_sorting-associated_protein_16__putative:location=Pf3D7_12_v3:1678438-1681536(-):protein_length=1032:sequence_SO=chromosome:SO=protein_coding_seq10	PF3D7_1239900.1-p1	(226, 287)	PF3D7_1239900.1-p1vacuolar_protein_sorting-associated_protein_16__putative	VLIESKENYNIKWEQMQHNQMKQQSGARTENNGEKKNATNNINNNDNYYFNNKMHKRILIKT
PF3D7_1139300.1-p1:transcript=PF3D7_1139300.1:gene=PF3D7_1139300:organism=Plasmodium_falciparum_3D7:gene_product=AP2_domain_transcription_factor__putative:transcript_product=AP2_domain_transcription_factor__putative:location=Pf3D7_11_v3:1556744-1565045(-):protein_length=2653:sequence_SO=chromosome:SO=protein_coding_seq33	PF3D7_1139300.1-p1	(801, 862)	PF3D7_1139300.1-p1AP2_domain_transcription_factor__putative	VSNNIVSNNIVSNNISNNNIINNNNNVIPFGDEHFDALSFDEYRKRINSKKSNYSNIGENEK
HB3var29_seq83	HB3var29	(2051, 2112)	var	ISDKNGPYSGIDLINDSLSFDYDIYDEILKRKENELFGTNHHTKHTSTHNVAKNTNSDPITN
HB3var29_seq82	HB3var29	(2026, 2087)	var	GKNNLYSDVDSTSDNRGPTSDTKDPISDKNGPYSGIDLINDSLSFDYDIYDEILKRKENELF
PFIT_1325800.1-p1:transcript=PFIT_1325800.1:gene=PFIT_1325800:organism=Plasmodium_falciparum_IT:gene_product=conserved_Plasmodium_protein__unknown_function:transcript_product=conserved_Plasmodium_protein__unknown_function:location=PfIT_13_v3:1072422-1087117(+):protein_length=4788:sequence_SO=chromosome:SO=protein_coding_seq144	PFIT_1325800.1-p1	(3576, 3637)	PFIT_1325800.1-p1conserved_Plasmodium_protein__unknown_function	YEDKYEDKYNDKYNDKYNDKERKKRNDSRNLNIYTKYYNNSKAQDKIKRKNYKSICSSDQNN
PFIT_1325800.1-p1:transcript=PFIT_1325800.1:gene=PFIT_1325800:organism=Plasmodium_falciparum_IT:gene_product=conserved_Plasmodium_protein__unknown_function:transcript_product=conserved_Plasmodium_protein__unknown_function:location=PfIT_13_v3:1072422-1087117(+):protein_length=4788:sequence_SO=chromosome:SO=protein_coding_seq141	PFIT_1325800.1-p1	(3501, 3562)	PFIT_1325800.1-p1conserved_Plasmodium_protein__unknown_function	RNKDKDDNKKDLDTSVSSFVLSFSYEEKDDKYEDKYEDKYEDKYEDKYEDKYEDKYEDKYED
PFIT_1325800.1-p1:transcript=PFIT_1325800.1:gene=PFIT_1325800:organism=Plasmodium_falciparum_IT:gene_product=conserved_Plasmodium_protein__unknown_function:transcript_product=conserved_Plasmodium_protein__unknown_function:location=PfIT_13_v3:1072422-1087117(+):protein_length=4788:sequence_SO=chromosome:SO=protein_coding_seq143	PFIT_1325800.1-p1	(3551, 3612)	PFIT_1325800.1-p1conserved_Plasmodium_protein__unknown_function	KYEDKYEDKYEDKYEDKYKDKYKDKYEDKYEDKYNDKYNDKYNDKERKKRNDSRNLNIYTKY
PFIT_1126200.1-p1:transcript=PFIT_1126200.1:gene=PFIT_1126200:organism=Plasmodium_falciparum_IT:gene_product=DNA-directed_RNA_polymerase:transcript_product=DNA-directed_RNA_polymerase:location=PfIT_11_v3:930833-935344(+):protein_length=1503:sequence_SO=chromosome:SO=protein_coding_seq31	PFIT_1126200.1-p1	(751, 812)	DNA-directed_RNA_polymerase	LDKYKKNNSYDNNFKKNYMEKKICTYNYGTHDKNVVKQNNGDKQNNGDKHNCANRQELQLSD
PFIT_0923500.1-p1:transcript=PFIT_0923500.1:gene=PFIT_0923500:organism=Plasmodium_falciparum_IT:gene_product=conserved_Plasmodium_protein__unknown_function:transcript_product=conserved_Plasmodium_protein__unknown_function:location=PfIT_09_v3:930817-933981(+):protein_length=1054:sequence_SO=chromosome:SO=protein_coding_seq13	PFIT_0923500.1-p1	(301, 362)	PFIT_0923500.1-p1conserved_Plasmodium_protein__unknown_function	RSNNNNVISHYEFDKPCEKRSTDTVDNYKNNIRYKKENKNDNTKSVYNSVGDKNLEVLSNHN
PFIT_0923500.1-p1:transcript=PFIT_0923500.1:gene=PFIT_0923500:organism=Plasmodium_falciparum_IT:gene_product=conserved_Plasmodium_protein__unknown_function:transcript_product=conserved_Plasmodium_protein__unknown_function:location=PfIT_09_v3:930817-933981(+):protein_length=1054:sequence_SO=chromosome:SO=protein_coding_seq15	PFIT_0923500.1-p1	(351, 412)	PFIT_0923500.1-p1conserved_Plasmodium_protein__unknown_function	GDKNLEVLSNHNIKEEYKNEEISSSHESEKKYERKYNYEKEHKYKDKDKNKDVLTSGDIKKN
PFIT_0923500.1-p1:transcript=PFIT_0923500.1:gene=PFIT_0923500:organism=Plasmodium_falciparum_IT:gene_product=conserved_Plasmodium_protein__unknown_function:transcript_product=conserved_Plasmodium_protein__unknown_function:location=PfIT_09_v3:930817-933981(+):protein_length=1054:sequence_SO=chromosome:SO=protein_coding_seq18	PFIT_0923500.1-p1	(426, 487)	PFIT_0923500.1-p1conserved_Plasmodium_protein__unknown_function	KSYSVNKISRKSSSKMYNKENKEYEQEKETFDQRNYYRNKSNYHHEYDKFEKYNYREKGNER
PFIT_0923500.1-p1:transcript=PFIT_0923500.1:gene=PFIT_0923500:organism=Plasmodium_falciparum_IT:gene_product=conserved_Plasmodium_protein__unknown_function:transcript_product=conserved_Plasmodium_protein__unknown_function:location=PfIT_09_v3:930817-933981(+):protein_length=1054:sequence_SO=chromosome:SO=protein_coding_seq19	PFIT_0923500.1-p1	(451, 512)	PFIT_0923500.1-p1conserved_Plasmodium_protein__unknown_function	QEKETFDQRNYYRNKSNYHHEYDKFEKYNYREKGNERDYELYDEDYKAYKNRKQYDNKYDYY
PF3D7_1218900.1-p1:transcript=PF3D7_1218900.1:gene=PF3D7_1218900:organism=Plasmodium_falciparum_3D7:gene_product=conserved_Plasmodium_protein__unknown_function:transcript_product=conserved_Plasmodium_protein__unknown_function:location=Pf3D7_12_v3:740994-743147(-):protein_length=717:sequence_SO=chromosome:SO=protein_coding_seq14	PF3D7_1218900.1-p1	(326, 387)	PF3D7_1218900.1-p1conserved_Plasmodium_protein__unknown_function	NEKNEISEKNEKNEKNEKNEKNEKNEKNEINKKDECHNDNHIYLYQQLEHISLGSPVMHIDI
PFA0015c_D4_seq9	PFA0015c_D4	(201, 262)	var	TSIHDRDLYTGEEISYNIHMSTNSMDDPKYVSNNVYSGIDLINDTLSGNQHIDIYDEVLKRK
PFB0010w_D5_seq17	PFB0010w_D5	(401, 462)	var	EDLEKYNEPYYDVQDDIYYDVHDHDVSTAGSNAMDVPSKVQIEMDINTKLVKEKYPISDVWD
PF3D7_1202100.1-p1:transcript=PF3D7_1202100.1:gene=PF3D7_1202100:organism=Plasmodium_falciparum_3D7:gene_product=SRAP_domain-containing_protein__putative:transcript_product=SRAP_domain-containing_protein__putative:location=Pf3D7_12_v3:113787-115923(+):protein_length=401:sequence_SO=chromosome:SO=protein_coding_seq9	PF3D7_1202100.1-p1	(201, 262)	PF3D7_1202100.1-p1SRAP_domain-containing_protein__putative	DEAKGEVKDEAKDEIKDEAKDEAKDEAKDEAKDEAKEEQEEDQLVDENSHKRKKVIKEEIST
PF3D7_0818000.1-p1:transcript=PF3D7_0818000.1:gene=PF3D7_0818000:organism=Plasmodium_falciparum_3D7:gene_product=conserved_protein__unknown_function:transcript_product=conserved_protein__unknown_function:location=Pf3D7_08_v3:821334-822452(+):protein_length=372:sequence_SO=chromosome:SO=protein_coding_seq9	PF3D7_0818000.1-p1	(201, 262)	PF3D7_0818000.1-p1conserved_protein__unknown_function	LSYDKYEKRKLRSYSTDSMEDKKNDKISLNNIQTYDNNDSNIKKNNTYVEEDDQYKNEEDSN
PF3D7_1313900.1-p1:transcript=PF3D7_1313900.1:gene=PF3D7_1313900:organism=Plasmodium_falciparum_3D7:gene_product=conserved_Plasmodium_protein__unknown_function:transcript_product=conserved_Plasmodium_protein__unknown_function:location=Pf3D7_13_v3:600666-601868(-):protein_length=400:sequence_SO=chromosome:SO=protein_coding_seq10	PF3D7_1313900.1-p1	(226, 287)	PF3D7_1313900.1-p1conserved_Plasmodium_protein__unknown_function	FLKYKFDPSLKNNNNETYSDILKKHEIHALLKEEEKRKNYEEKEIRKRKNYEQSMLKTDVSN
PF3D7_1241900.1-p1:transcript=PF3D7_1241900.1:gene=PF3D7_1241900:organism=Plasmodium_falciparum_3D7:gene_product=tetratricopeptide_repeat_protein__putative:transcript_product=tetratricopeptide_repeat_protein__putative:location=Pf3D7_12_v3:1784380-1786410(+):protein_length=676:sequence_SO=chromosome:SO=protein_coding_seq12	PF3D7_1241900.1-p1	(276, 337)	PF3D7_1241900.1-p1tetratricopeptide_repeat_protein__putative	DIKREDVKYKDDLDNKDNMMNDIKREDVKYKDDLDNKDNVVNDIKGEDVKYKDDFYNKDNVN
PFIT_0710800.1-p1:transcript=PFIT_0710800.1:gene=PFIT_0710800:organism=Plasmodium_falciparum_IT:gene_product=erythrocyte_membrane_protein_1__PfEMP1:transcript_product=erythrocyte_membrane_protein_1__PfEMP1:location=PfIT_07_v3:553673-561976(-):protein_length=2329:sequence_SO=chromosome:SO=protein_coding_seq80	PFIT_0710800.1-p1	(1976, 2037)	var	SDTQNDIQSDDIPSSKITDNEWNQLKHDFISQYIQSEQLDVPNDYSSGDIPFNTQPNTLYFD
PFIT_0710800.1-p1:transcript=PFIT_0710800.1:gene=PFIT_0710800:organism=Plasmodium_falciparum_IT:gene_product=erythrocyte_membrane_protein_1__PfEMP1:transcript_product=erythrocyte_membrane_protein_1__PfEMP1:location=PfIT_07_v3:553673-561976(-):protein_length=2329:sequence_SO=chromosome:SO=protein_coding_seq83	PFIT_0710800.1-p1	(2051, 2112)	var	RNLYTGEEYNYNINMSTNSMDDIPINRDNNVYSGIDLINDTLSGNEHIDIYDELLKRKENEL
PFIT_0710800.1-p1:transcript=PFIT_0710800.1:gene=PFIT_0710800:organism=Plasmodium_falciparum_IT:gene_product=erythrocyte_membrane_protein_1__PfEMP1:transcript_product=erythrocyte_membrane_protein_1__PfEMP1:location=PfIT_07_v3:553673-561976(-):protein_length=2329:sequence_SO=chromosome:SO=protein_coding_seq84	PFIT_0710800.1-p1	(2076, 2137)	var	NRDNNVYSGIDLINDTLSGNEHIDIYDELLKRKENELFGTNHPKRTSNNSVIKSTNSDPILN
PFIT_0710800.1-p1:transcript=PFIT_0710800.1:gene=PFIT_0710800:organism=Plasmodium_falciparum_IT:gene_product=erythrocyte_membrane_protein_1__PfEMP1:transcript_product=erythrocyte_membrane_protein_1__PfEMP1:location=PfIT_07_v3:553673-561976(-):protein_length=2329:sequence_SO=chromosome:SO=protein_coding_seq87	PFIT_0710800.1-p1	(2151, 2212)	var	NMCEQWDKNKKEELLDKLKEQWENETHSGNTHPSDSNKTLNTDVSIQIHMDNPKPINQFTNM
PFCLINvar12_seq33	PFCLINvar12	(801, 862)	var	CNGTESSEKKDVERRDVVLCLIEKLEKEATSCKDKNSDKTEQQCQDPTPVPDDEEDLLLEEE
PFIT_0402800.1-p1:transcript=PFIT_0402800.1:gene=PFIT_0402800:organism=Plasmodium_falciparum_IT:gene_product=transcription_factor_with_AP2_domain(s)__putative:transcript_product=transcription_factor_with_AP2_domain(s)__putative:location=PfIT_04_v3:253810-260638(-):protein_length=2229:sequence_SO=chromosome:SO=protein_coding_seq29	PFIT_0402800.1-p1	(701, 762)	PFIT_0402800.1-p1transcription_factor_with_AP2_domain(s)__putative	DYDDDDDNNNNISCTYGTHQNLLHNYNNNYNMDEPIEEENTYYDKEYKNKTENTNLLKNIKV
AY028643_seq102	AY028643	(2526, 2587)	var	EMKEETKDKEEGECKAASPVVPESSGTEGTNGENEDEKPKGEEGGTAQETEQTNVIKPRKGS
PFIT_1423600.1-p1:transcript=PFIT_1423600.1:gene=PFIT_1423600:organism=Plasmodium_falciparum_IT:gene_product=conserved_Plasmodium_protein__unknown_function:transcript_product=conserved_Plasmodium_protein__unknown_function:location=PfIT_14_v3:937904-939760(+):protein_length=618:sequence_SO=chromosome:SO=protein_coding_seq11	PFIT_1423600.1-p1	(251, 312)	PFIT_1423600.1-p1conserved_Plasmodium_protein__unknown_function	CENAQNCNYCEKGKSCANENKCTTNDKCSGENKHVAKKECSGENKHVAKNERSGENKCVAKN
PF3D7_0707400.1-p1:transcript=PF3D7_0707400.1:gene=PF3D7_0707400:organism=Plasmodium_falciparum_3D7:gene_product=AAA_family_ATPase__putative:transcript_product=AAA_family_ATPase__putative:location=Pf3D7_07_v3:343912-345903(+):protein_length=663:sequence_SO=chromosome:SO=protein_coding_seq26	PF3D7_0707400.1-p1	(626, 687)	PF3D7_0707400.1-p1AAA_family_ATPase__putative	SNFKLKDNPNVHKKKNEQHHNITNIEQEHNKKENDENSKNINLNNTPNHDAIKKKVLINEQL
PF3D7_0700800.1-p1:transcript=PF3D7_0700800.1:gene=PF3D7_0700800:organism=Plasmodium_falciparum_3D7:gene_product=Pfmc-2TM_Maurer's_cleft_two_transmembrane_protein:transcript_product=Pfmc-2TM_Maurer's_cleft_two_transmembrane_protein:location=Pf3D7_07_v3:48300-49106(+):protein_length=231:sequence_SO=chromosome:SO=protein_coding_seq5	PF3D7_0700800.1-p1	(101, 162)	Pfmc-2TM	IKNLTLKYMNSDDIKEKNESINELKKYSNNEECKEHMDNYLMYLRMQNDIKCLKRKNFWNNI
PFIT_1311300.1-p1:transcript=PFIT_1311300.1:gene=PFIT_1311300:organism=Plasmodium_falciparum_IT:gene_product=conserved_Plasmodium_protein__unknown_function:transcript_product=conserved_Plasmodium_protein__unknown_function:location=PfIT_13_v3:481452-485773(-):protein_length=1353:sequence_SO=chromosome:SO=protein_coding_seq7	PFIT_1311300.1-p1	(151, 212)	PFIT_1311300.1-p1conserved_Plasmodium_protein__unknown_function	NHLLKKIQSEEFLKNDFSWKSEINNIKNMNKQILFDDIKISDDIKTSDDIKISDNIKISDDI
PFIT_1311300.1-p1:transcript=PFIT_1311300.1:gene=PFIT_1311300:organism=Plasmodium_falciparum_IT:gene_product=conserved_Plasmodium_protein__unknown_function:transcript_product=conserved_Plasmodium_protein__unknown_function:location=PfIT_13_v3:481452-485773(-):protein_length=1353:sequence_SO=chromosome:SO=protein_coding_seq8	PFIT_1311300.1-p1	(176, 237)	PFIT_1311300.1-p1conserved_Plasmodium_protein__unknown_function	IKNMNKQILFDDIKISDDIKTSDDIKISDNIKISDDIKTSDDIKISDDIKTSDEIKTSDNIK
PREICHvar71_seq19	PREICHvar71	(451, 512)	var	ENIDFSNNVDKTFYRSEYCQVCPYCGVEYRNGKYNIKKNKDGNCGKNVHYSPPKDVTPIDIH
PREICHvar71_seq16	PREICHvar71	(376, 437)	var	IWLENQRNEFEKQKEKYEKEIQAYVLKKDKSGSNINNEYYKKFYVKLKNNNYESVENFLKLL
PREICHvar71_seq17	PREICHvar71	(401, 462)	var	LKKDKSGSNINNEYYKKFYVKLKNNNYESVENFLKLLNEGRYCKTENAEEENIDFSNNVDKT
PFIT_0535100.1-p1:transcript=PFIT_0535100.1:gene=PFIT_0535100:organism=Plasmodium_falciparum_IT:gene_product=formin_1:transcript_product=formin_1:location=PfIT_05_v3:1451885-1460080(-):protein_length=2731:sequence_SO=chromosome:SO=protein_coding_seq80	PFIT_0535100.1-p1	(1976, 2037)	formin_1	PNDNSAKDDTPNENQNHEEIINNNQEENKQIELSNDKENQNQNQNENQNKSISLINNVQNNS
PF3D7_1108100.1-p1:transcript=PF3D7_1108100.1:gene=PF3D7_1108100:organism=Plasmodium_falciparum_3D7:gene_product=conserved_Plasmodium_protein__unknown_function:transcript_product=conserved_Plasmodium_protein__unknown_function:location=Pf3D7_11_v3:356083-360434(+):protein_length=1368:sequence_SO=chromosome:SO=protein_coding_seq18	PF3D7_1108100.1-p1	(426, 487)	PF3D7_1108100.1-p1conserved_Plasmodium_protein__unknown_function	IYKADNIDNKDDIYKADNIDNKDDIYKADNIYNKDDIYKADNIYKADNIYKADNIDNKDDLC
PF3D7_1108100.1-p1:transcript=PF3D7_1108100.1:gene=PF3D7_1108100:organism=Plasmodium_falciparum_3D7:gene_product=conserved_Plasmodium_protein__unknown_function:transcript_product=conserved_Plasmodium_protein__unknown_function:location=Pf3D7_11_v3:356083-360434(+):protein_length=1368:sequence_SO=chromosome:SO=protein_coding_seq17	PF3D7_1108100.1-p1	(401, 462)	PF3D7_1108100.1-p1conserved_Plasmodium_protein__unknown_function	DVYVKKDIDEKDNIDNKDNIYNKDDIYKADNIDNKDDIYKADNIDNKDDIYKADNIYNKDDI
PFCLINvar69_seq42	PFCLINvar69	(1026, 1087)	var	PEVQKNLISNPAYKYETVKFSGNTTSLENFAERPQFLRWFTEWGDEFCRERKKKENEVEKKC
PF3D7_0303000.1-p1:transcript=PF3D7_0303000.1:gene=PF3D7_0303000:organism=Plasmodium_falciparum_3D7:gene_product=N-ethylmaleimide-sensitive_fusion_protein:transcript_product=N-ethylmaleimide-sensitive_fusion_protein:location=Pf3D7_03_v3:159353-161704(-):protein_length=783:sequence_SO=chromosome:SO=protein_coding_seq19	PF3D7_0303000.1-p1	(451, 512)	N-ethylmaleimide-sensitive_fusion_protein	MSNKLSSDVNILELAERTPNFSGAEIEGLVRNTVSYAFERHINFNDLTKPINADDIMITKND
PFIT_1204600.1-p1:transcript=PFIT_1204600.1:gene=PFIT_1204600:organism=Plasmodium_falciparum_IT:gene_product=conserved_Plasmodium_protein__unknown_function:transcript_product=conserved_Plasmodium_protein__unknown_function:location=PfIT_12_v3:174515-177093(+):protein_length=782:sequence_SO=chromosome:SO=protein_coding_seq1	PFIT_1204600.1-p1	(1, 62)	PFIT_1204600.1-p1conserved_Plasmodium_protein__unknown_function	MSYNDGSEEENDSNTYIHDEKKKKKKKNNKNAYALINEVNYSQEDEQEVIHNTNSEDETSNR
PF3D7_1249300.1-p1:transcript=PF3D7_1249300.1:gene=PF3D7_1249300:organism=Plasmodium_falciparum_3D7:gene_product=protein_phosphatase_PPM4__putative:transcript_product=protein_phosphatase_PPM4__putative:location=Pf3D7_12_v3:2012643-2015726(+):protein_length=1027:sequence_SO=chromosome:SO=protein_coding_seq6	PF3D7_1249300.1-p1	(126, 187)	PF3D7_1249300.1-p1protein_phosphatase_PPM4__putative	ENDTKTENDENMLNNNTIEHSEEKDSDNNDKPFINNKRALICSHDDTIIKNENTKKYKVEES
PFIT_1227000.1-p1:transcript=PFIT_1227000.1:gene=PFIT_1227000:organism=Plasmodium_falciparum_IT:gene_product=conserved_Plasmodium_protein__unknown_function:transcript_product=conserved_Plasmodium_protein__unknown_function:location=PfIT_12_v3:1057613-1061104(+):protein_length=1163:sequence_SO=chromosome:SO=protein_coding_seq29	PFIT_1227000.1-p1	(701, 762)	PFIT_1227000.1-p1conserved_Plasmodium_protein__unknown_function	NNILSGYNAHDIKEQKRDDSLKCEESFYFDENGYFKYKKKRKGAKEFFNHNYSSTYNYINNN
PFIT_1032400.1-p1:transcript=PFIT_1032400.1:gene=PFIT_1032400:organism=Plasmodium_falciparum_IT:gene_product=conserved_Plasmodium_protein__unknown_function:transcript_product=conserved_Plasmodium_protein__unknown_function:location=PfIT_10_v3:1255674-1257338(+):protein_length=554:sequence_SO=chromosome:SO=protein_coding_seq20	PFIT_1032400.1-p1	(476, 537)	PFIT_1032400.1-p1conserved_Plasmodium_protein__unknown_function	KDHTTDYEQQNMHYQTYDYNDEHNMNQQKTLSEKHKRIKLSMEKKTQNKKETHSNSRYCNFK
PFIT_0400900.1-p1:transcript=PFIT_0400900.1:gene=PFIT_0400900:organism=Plasmodium_falciparum_IT:gene_product=surface-associated_interspersed_protein_4.1_(SURFIN_4.1):transcript_product=surface-associated_interspersed_protein_4.1_(SURFIN_4.1):location=PfIT_04_v3:157505-164297(-):protein_length=2221:sequence_SO=chromosome:SO=protein_coding_seq23	PFIT_0400900.1-p1	(551, 612)	Surfin	IEDKGQLKDFTIETVKYTSDGLNGFDHEVAVTDPKLLPGEQLIALTGEVYESLPDHNEIVFY
PFIT_0400900.1-p1:transcript=PFIT_0400900.1:gene=PFIT_0400900:organism=Plasmodium_falciparum_IT:gene_product=surface-associated_interspersed_protein_4.1_(SURFIN_4.1):transcript_product=surface-associated_interspersed_protein_4.1_(SURFIN_4.1):location=PfIT_04_v3:157505-164297(-):protein_length=2221:sequence_SO=chromosome:SO=protein_coding_seq24	PFIT_0400900.1-p1	(576, 637)	Surfin	DHEVAVTDPKLLPGEQLIALTGEVYESLPDHNEIVFYGSPIPHRRFARSYPLNTTTTLEGTS
IGHvar09_seq32	IGHvar09	(776, 837)	var	DKSSDKYKAESVLKGDISLVKFNKGANPRELKTECDITNKHTNDSRRDRRGYKGPCEGKDNE
PFIT_1453200.1-p1:transcript=PFIT_1453200.1:gene=PFIT_1453200:organism=Plasmodium_falciparum_IT:gene_product=rhoptry_neck_protein_2:transcript_product=rhoptry_neck_protein_2:location=PfIT_14_v3:2158543-2165256(+):protein_length=2237:sequence_SO=chromosome:SO=protein_coding_seq9	PFIT_1453200.1-p1	(201, 262)	rhoptry_neck_protein_2	NSEYEKIRRKEEEAARRIERERRADINRKNQDNNSNKYNNEQNGGYESDGNSPNSRVNINIT
PFIT_0405500.1-p1:transcript=PFIT_0405500.1:gene=PFIT_0405500:organism=Plasmodium_falciparum_IT:gene_product=conserved_Plasmodium_protein__unknown_function:transcript_product=conserved_Plasmodium_protein__unknown_function:location=PfIT_04_v3:381982-388187(-):protein_length=1757:sequence_SO=chromosome:SO=protein_coding_seq39	PFIT_0405500.1-p1	(951, 1012)	PFIT_0405500.1-p1conserved_Plasmodium_protein__unknown_function	DNVCKRNNIVVKYMVHNKAQMNKKEASASIKKYNIHKNIHKNIGINRSTHVSDYKVDSIQNG
PFIT_0405500.1-p1:transcript=PFIT_0405500.1:gene=PFIT_0405500:organism=Plasmodium_falciparum_IT:gene_product=conserved_Plasmodium_protein__unknown_function:transcript_product=conserved_Plasmodium_protein__unknown_function:location=PfIT_04_v3:381982-388187(-):protein_length=1757:sequence_SO=chromosome:SO=protein_coding_seq38	PFIT_0405500.1-p1	(926, 987)	PFIT_0405500.1-p1conserved_Plasmodium_protein__unknown_function	FSHLLKNNCIKKTSMLSLCNMKDKSDNVCKRNNIVVKYMVHNKAQMNKKEASASIKKYNIHK
PFIT_0719200.1-p1:transcript=PFIT_0719200.1:gene=PFIT_0719200:organism=Plasmodium_falciparum_IT:gene_product=conserved_Plasmodium_membrane_protein__unknown_function:transcript_product=conserved_Plasmodium_membrane_protein__unknown_function:location=PfIT_07_v3:889238-899667(+):protein_length=3426:sequence_SO=chromosome:SO=protein_coding_seq47	PFIT_0719200.1-p1	(1151, 1212)	PFIT_0719200.1-p1conserved_Plasmodium_membrane_protein__unknown_function	GDQNEGRRQEKVLNNKDNNDKNDKNDKNDKNDKNDKNDKNDKNEKNEKNDYDKRSEYISYEY
PFCLINvar40_seq36	PFCLINvar40	(876, 937)	var	KYKDDKKKEVTTDGTANDPDAQLNSGTIPEEFKRQMFYTFGDYRDLCLGKDIGNDSGKDISG
PF3D7_1239200.1-p1:transcript=PF3D7_1239200.1:gene=PF3D7_1239200:organism=Plasmodium_falciparum_3D7:gene_product=AP2_domain_transcription_factor__putative:transcript_product=AP2_domain_transcription_factor__putative:location=Pf3D7_12_v3:1634695-1642428(+):protein_length=2577:sequence_SO=chromosome:SO=protein_coding_seq71	PF3D7_1239200.1-p1	(1751, 1812)	PF3D7_1239200.1-p1AP2_domain_transcription_factor__putative	TTSTENMFPSHSTNINDSNIVKVVDSHDSINNHEEGLVNALNTIKADKSNGENSYSILDSND
PF3D7_0919900.1-p1:transcript=PF3D7_0919900.1:gene=PF3D7_0919900:organism=Plasmodium_falciparum_3D7:gene_product=regulator_of_chromosome_condensation__putative:transcript_product=regulator_of_chromosome_condensation__putative:location=Pf3D7_09_v3:809659-819804(-):protein_length=3381:sequence_SO=chromosome:SO=protein_coding_seq52	PF3D7_0919900.1-p1	(1276, 1337)	PF3D7_0919900.1-p1regulator_of_chromosome_condensation__putative	YNTKESNKFIEEEKKKVNISLDPNKDNKDNNNINNNYEEIHKDGYILRNYRTNENMEEQKKN
PF3D7_1238500.1-p1:transcript=PF3D7_1238500.1:gene=PF3D7_1238500:organism=Plasmodium_falciparum_3D7:gene_product=conserved_Plasmodium_protein__unknown_function:transcript_product=conserved_Plasmodium_protein__unknown_function:location=Pf3D7_12_v3:1594826-1600526(+):protein_length=1812:sequence_SO=chromosome:SO=protein_coding_seq48	PF3D7_1238500.1-p1	(1176, 1237)	PF3D7_1238500.1-p1conserved_Plasmodium_protein__unknown_function	SDEDENIKSDEEESIKSNEDESIKSDDEENIKLDEDENIKLDEEESIKSNEDESIKSNEEES
PF3D7_0804500.1-p1:transcript=PF3D7_0804500.1:gene=PF3D7_0804500:organism=Plasmodium_falciparum_3D7:gene_product=conserved_Plasmodium_membrane_protein__unknown_function:transcript_product=conserved_Plasmodium_membrane_protein__unknown_function:location=Pf3D7_08_v3:250083-268437(+):protein_length=6034:sequence_SO=chromosome:SO=protein_coding_seq110	PF3D7_0804500.1-p1	(2726, 2787)	PF3D7_0804500.1-p1conserved_Plasmodium_membrane_protein__unknown_function	NGDKISGDKINGDKINGDKINGDKINGDKINGDKINGDNINGDQINGDKINSNNFMETSSTP
PF3D7_0606600.1-p1:transcript=PF3D7_0606600.1:gene=PF3D7_0606600:organism=Plasmodium_falciparum_3D7:gene_product=conserved_Plasmodium_protein__unknown_function:transcript_product=conserved_Plasmodium_protein__unknown_function:location=Pf3D7_06_v3:270332-277762(-):protein_length=2414:sequence_SO=chromosome:SO=protein_coding_seq60	PF3D7_0606600.1-p1	(1476, 1537)	PF3D7_0606600.1-p1conserved_Plasmodium_protein__unknown_function	DSNNMVDDNNNMVDDNNNMVDDNNNMVDDNNNMVDDNNNMVDDNNNMVDDNNNMVDDNNNMV
PFIT_0411300.1-p1:transcript=PFIT_0411300.1:gene=PFIT_0411300:organism=Plasmodium_falciparum_IT:gene_product=erythrocyte_membrane_protein_1__PfEMP1:transcript_product=erythrocyte_membrane_protein_1__PfEMP1:location=PfIT_04_v3:591158-592655(-):protein_length=497:sequence_SO=chromosome:SO=protein_coding_seq18	PFIT_0411300.1-p1	(426, 487)	var	DLEKYNEPYYYDFYEDDIYYDVNDDKASVDHINMDHNKMDNNNSDVPTKVQIEMNVINNQEL
PFIT_0411300.1-p1:transcript=PFIT_0411300.1:gene=PFIT_0411300:organism=Plasmodium_falciparum_IT:gene_product=erythrocyte_membrane_protein_1__PfEMP1:transcript_product=erythrocyte_membrane_protein_1__PfEMP1:location=PfIT_04_v3:591158-592655(-):protein_length=497:sequence_SO=chromosome:SO=protein_coding_seq17	PFIT_0411300.1-p1	(401, 462)	var	NPKPKNKFTNMDTNPDKSTKDTILHDLEKYNEPYYYDFYEDDIYYDVNDDKASVDHINMDHN
PFIT_0411300.1-p1:transcript=PFIT_0411300.1:gene=PFIT_0411300:organism=Plasmodium_falciparum_IT:gene_product=erythrocyte_membrane_protein_1__PfEMP1:transcript_product=erythrocyte_membrane_protein_1__PfEMP1:location=PfIT_04_v3:591158-592655(-):protein_length=497:sequence_SO=chromosome:SO=protein_coding_seq12	PFIT_0411300.1-p1	(276, 337)	var	PYSGIDLINDALNGDYDIYDEILKRKENELFGTKHHTKHTTTNIVTKLTNSDPILNQINLFH
PF3D7_0508500.1-p1:transcript=PF3D7_0508500.1:gene=PF3D7_0508500:organism=Plasmodium_falciparum_3D7:gene_product=guanidine_nucleotide_exchange_factor:transcript_product=guanidine_nucleotide_exchange_factor:location=Pf3D7_05_v3:347219-355039(-):protein_length=2606:sequence_SO=chromosome:SO=protein_coding_seq83	PF3D7_0508500.1-p1	(2051, 2112)	guanidine_nucleotide_exchange_factor	KDMGNIQRPKGVSTFGTHQDNKKINSNEGNESLLRKAKNDNLNDRFEMKEGKGMINGVMKRG
PFIT_1240000.1-p1:transcript=PFIT_1240000.1:gene=PFIT_1240000:organism=Plasmodium_falciparum_IT:gene_product=C_ITvar5_-_erythrocyte_membrane_protein_1__PfEMP1__putative:transcript_product=C_ITvar5_-_erythrocyte_membrane_protein_1__PfEMP1__putative:location=PfIT_12_v3:1641881-1650240(+):protein_length=2084:sequence_SO=chromosome:SO=protein_coding_seq80	PFIT_1240000.1-p1	(1976, 2037)	var	NKPSHNHVLNTDVSIQIDMDNPKTKNEITNMDTNPDKSTTDTILDDLEKYNEPYYYDFYEDD
IGHvar18_seq5	IGHvar18	(101, 162)	var	IKDSDSNGDACAPFRRLNLCNKNLETVSNYNSNARHKLLAEVCYAAKYEGDLIKTHHTKHEQ
DD2var39_seq77	DD2var39	(1901, 1962)	var	NLYTGEEYSYNVNMVNNDNIPINRDNNPYSGIDLINDSLNSNKVDIYDELLKRKENELFGTE
DD2var39_seq74	DD2var39	(1826, 1887)	var	DTQNDIQNDGIPSSKITDNEWNTLKDDFISNMLQNQPKDVPNDYSSGDIPFNTQPNTLYFDN
PF3D7_0514700.1-p1:transcript=PF3D7_0514700.1:gene=PF3D7_0514700:organism=Plasmodium_falciparum_3D7:gene_product=conserved_Plasmodium_protein__unknown_function:transcript_product=conserved_Plasmodium_protein__unknown_function:location=Pf3D7_05_v3:610089-614771(+):protein_length=1560:sequence_SO=chromosome:SO=protein_coding_seq25	PF3D7_0514700.1-p1	(601, 662)	PF3D7_0514700.1-p1conserved_Plasmodium_protein__unknown_function	EHKGEHKGEHKGEHKGEHKGEQKNEQKNEHKGEQKNEQKNEHKGEQKNERGSKRLIHKDNIS
PFIT_bin03300.1-p1:transcript=PFIT_bin03300.1:gene=PFIT_bin03300:organism=Plasmodium_falciparum_IT:gene_product=stevor:transcript_product=stevor:location=PfIT_bin_v3_archived_contig_6:37355-38319(-):protein_length=286:sequence_SO=random_sequence:SO=protein_coding_seq5	PFIT_bin03300.1-p1	(101, 162)	Stevor	AEPMSMIENELLETYEEMFSDKNHVMLKSGRYPNDEDKSDDLSSCECTDINNAKLVKTKGRD
PF3D7_0104600.1-p1:transcript=PF3D7_0104600.1:gene=PF3D7_0104600:organism=Plasmodium_falciparum_3D7:gene_product=conserved_Plasmodium_protein__unknown_function:transcript_product=conserved_Plasmodium_protein__unknown_function:location=Pf3D7_01_v3:206170-210189(+):protein_length=1339:sequence_SO=chromosome:SO=protein_coding_seq3	PF3D7_0104600.1-p1	(51, 112)	PF3D7_0104600.1-p1conserved_Plasmodium_protein__unknown_function	NINNKLSYVTYEENIRIKEKKQKKDYKDEKDEKDDENHKYITKKKCHIKDNHIIYPSQNLKK
Dd2__Surfin4.2_seq2	Dd2__Surfin4.2_seq2	(26, 87)	Surfin	VERFREIFEIYVEDKLEELKRSGSEKYDKDCRDFNYFMDDVKDVFINNDLVKIPVEVRKSIW
Dd2__Surfin4.2_seq3	Dd2__Surfin4.2_seq3	(51, 112)	Surfin	KYDKDCRDFNYFMDDVKDVFINNDLVKIPVEVRKSIWETHVDKNLPTLMKNTTSCKCIRKEH
PFIT_1218700.1-p1:transcript=PFIT_1218700.1:gene=PFIT_1218700:organism=Plasmodium_falciparum_IT:gene_product=formin_2:transcript_product=formin_2:location=PfIT_12_v3:698389-707322(+):protein_length=2977:sequence_SO=chromosome:SO=protein_coding_seq43	PFIT_1218700.1-p1	(1051, 1112)	formin_2	SSGRSIQTSESKESFSDNKKNIIYDHFDKKEKSSFFYNKSQIFHKDENNMKNDFSEYLQKMK
PF3D7_0620400.1-p1:transcript=PF3D7_0620400.1:gene=PF3D7_0620400:organism=Plasmodium_falciparum_3D7:gene_product=merozoite_surface_protein_10:transcript_product=merozoite_surface_protein_10:location=Pf3D7_06_v3:851378-852955(-):protein_length=525:sequence_SO=chromosome:SO=protein_coding_seq3	PF3D7_0620400.1-p1	(51, 112)	merozoite_surface_protein_10	MNNEKNDNKDNKDNIYNDNINNDNINNDNINNEDEYKFLSMKHYKDSLSNKLNNENDHMNYL
PF3D7_1015900.1-p1:transcript=PF3D7_1015900.1:gene=PF3D7_1015900:organism=Plasmodium_falciparum_3D7:gene_product=enolase:transcript_product=enolase:location=Pf3D7_10_v3:637138-639011(+):protein_length=446:sequence_SO=chromosome:SO=protein_coding_seq3	PF3D7_1015900.1-p1	(51, 112)	enolase	LRDNDKSRYLGKGVQKAIKNINEIIAPKLIGMNCTEQKKIDNLMVEELDGSKNEWGWSKSKL
IT4var02_seq29	IT4var02	(701, 762)	var	KTQHKESNNQKSCDKTTKIINDDEEDDEEDDQDKPRILKNPCVNSRDQKVGNVKSVRDVAEE
IT4var02_seq27	IT4var02	(651, 712)	var	GNALNKDEKLDKMKEPDGCNEPNKSNGKSCKNNDVITILLNRLQKEMNSCKTQHKESNNQKS
IT4var02_seq20	IT4var02	(476, 537)	var	KCPKIQTATNIRTYKIEKPIDINILVNNNKKIGLSPELKDDFNDCDLFKRLRRQEWKCKYKC
PFIT_0800100.1-p1:transcript=PFIT_0800100.1:gene=PFIT_0800100:organism=Plasmodium_falciparum_IT:gene_product=B_ITvar13_-_erythrocyte_membrane_protein_1__PfEMP1__putative:transcript_product=B_ITvar13_-_erythrocyte_membrane_protein_1__PfEMP1__putative:location=PfIT_08_v3:2493-14713(+):protein_length=3668:sequence_SO=chromosome:SO=protein_coding_seq56	PFIT_0800100.1-p1	(1376, 1437)	var	NNSRLGWKCIPTSGGDKAATRGSGDTTKQNDSEGSEGEGSHQRAKRHTSDASGEKSAKSGEP
PFIT_1120800.1-p1:transcript=PFIT_1120800.1:gene=PFIT_1120800:organism=Plasmodium_falciparum_IT:gene_product=conserved_Plasmodium_protein__unknown_function:transcript_product=conserved_Plasmodium_protein__unknown_function:location=PfIT_11_v3:688529-692736(+):protein_length=1060:sequence_SO=chromosome:SO=protein_coding_seq14	PFIT_1120800.1-p1	(326, 387)	PFIT_1120800.1-p1conserved_Plasmodium_protein__unknown_function	DDLDFSNVRNKKKEDDVNFSDVRNKKKEDALDFSNVRNKKKEDDLDFSNVRNKNKEDDMDFS
PFCLINvar59_seq84	PFCLINvar59	(2076, 2137)	var	YIYLEGDSGTDSGYTDHYSDITSSSESEYEELDINDIYVPGSPKYKTLIEVVLEPSGNNTTA
PF3D7_1355600.1-p1:transcript=PF3D7_1355600.1:gene=PF3D7_1355600:organism=Plasmodium_falciparum_3D7:gene_product=conserved_Plasmodium_protein__unknown_function:transcript_product=conserved_Plasmodium_protein__unknown_function:location=Pf3D7_13_v3:2202611-2204481(-):protein_length=562:sequence_SO=chromosome:SO=protein_coding_seq8	PF3D7_1355600.1-p1	(176, 237)	PF3D7_1355600.1-p1conserved_Plasmodium_protein__unknown_function	NFNMHFNGNSNINNKFMKDNIFNGNNLNNKFANKKMIDASKIWKKDIPANNIMNYVDKRKVD
PFL2665c_D6_seq15	PFL2665c_D6	(351, 412)	var	LNTDVSIQIDMDNPKPTNEFTYVDSNPNQVDDTYVDSNPDNSSMDTILDDLEKYNEPYYDMY
PF3D7_0701100.1-p1:transcript=PF3D7_0701100.1:gene=PF3D7_0701100:organism=Plasmodium_falciparum_3D7:gene_product=rifin:transcript_product=rifin:location=Pf3D7_07_v3:55562-56781(-):protein_length=329:sequence_SO=chromosome:SO=protein_coding_seq3	PF3D7_0701100.1-p1	(51, 112)	rifin	NDPQMKEVMDNFNRQTQQRFHEYDERMVEKRMQCKDKCDEAIQKIILKDKLEKQMVEQFSTL
PFIT_0924600.1-p1:transcript=PFIT_0924600.1:gene=PFIT_0924600:organism=Plasmodium_falciparum_IT:gene_product=conserved_Plasmodium_membrane_protein__unknown_function:transcript_product=conserved_Plasmodium_membrane_protein__unknown_function:location=PfIT_09_v3:973014-977280(-):protein_length=1232:sequence_SO=chromosome:SO=protein_coding_seq44	PFIT_0924600.1-p1	(1076, 1137)	PFIT_0924600.1-p1conserved_Plasmodium_membrane_protein__unknown_function	SDKELKYSVSVYILFLVCKYCYAPINLNMLLFGQNILNNIILIDNINSYTWLNIFLLILFKT
HB3var09_seq18	HB3var09	(426, 487)	var	KKANGKNGTSITIGKTTINNIYAKEFYKKLKRAKYKDVETFLGKLNEEGICQKPPEVGEEKA
HB3var09_seq14	HB3var09	(326, 387)	var	FDYVPQYLRWFEEWAEDFCRIRKHKLEDAIKKCREKVKEDKKLYCDLNRHDCEKTASGKHDF
PF3D7_1120600.1-p1:transcript=PF3D7_1120600.1:gene=PF3D7_1120600:organism=Plasmodium_falciparum_3D7:gene_product=conserved_Plasmodium_protein__unknown_function:transcript_product=conserved_Plasmodium_protein__unknown_function:location=Pf3D7_11_v3:775233-783639(-):protein_length=2545:sequence_SO=chromosome:SO=protein_coding_seq85	PF3D7_1120600.1-p1	(2101, 2162)	PF3D7_1120600.1-p1conserved_Plasmodium_protein__unknown_function	NNINNIDNMDNKKHIENINNMKNMENMNNINNIENMNNMKNIENMNNMKNIENMNNINNIEN
PF3D7_1308400.1-p1:transcript=PF3D7_1308400.1:gene=PF3D7_1308400:organism=Plasmodium_falciparum_3D7:gene_product=conserved_Plasmodium_protein__unknown_function:transcript_product=conserved_Plasmodium_protein__unknown_function:location=Pf3D7_13_v3:373487-392072(-):protein_length=6147:sequence_SO=chromosome:SO=protein_coding_seq184	PF3D7_1308400.1-p1	(4576, 4637)	PF3D7_1308400.1-p1conserved_Plasmodium_protein__unknown_function	YKEESNNIKNTKYVFDNTNCMNIKKEIYTDEDTIDSIDSLKQAEIFKNKFYKNRKIKRVSKK
PF3D7_1137600.1-p1:transcript=PF3D7_1137600.1:gene=PF3D7_1137600:organism=Plasmodium_falciparum_3D7:gene_product=conserved_Plasmodium_protein__unknown_function:transcript_product=conserved_Plasmodium_protein__unknown_function:location=Pf3D7_11_v3:1474667-1476838(-):protein_length=656:sequence_SO=chromosome:SO=protein_coding_seq22	PF3D7_1137600.1-p1	(526, 587)	PF3D7_1137600.1-p1conserved_Plasmodium_protein__unknown_function	RDNMNNSNNMDNKDNMNNKDNINNKDNMNNKDNINNKDNINNLNCIDNMKHDKLQKDHLETP
PF3D7_1137600.1-p1:transcript=PF3D7_1137600.1:gene=PF3D7_1137600:organism=Plasmodium_falciparum_3D7:gene_product=conserved_Plasmodium_protein__unknown_function:transcript_product=conserved_Plasmodium_protein__unknown_function:location=Pf3D7_11_v3:1474667-1476838(-):protein_length=656:sequence_SO=chromosome:SO=protein_coding_seq21	PF3D7_1137600.1-p1	(501, 562)	PF3D7_1137600.1-p1conserved_Plasmodium_protein__unknown_function	NMDDMDNTDNMNNRGNMNNRDNINNRDNMNNSNNMDNKDNMNNKDNINNKDNMNNKDNINNK
PFIT_0305100.1-p1:transcript=PFIT_0305100.1:gene=PFIT_0305100:organism=Plasmodium_falciparum_IT:gene_product=conserved_Plasmodium_protein__unknown_function:transcript_product=conserved_Plasmodium_protein__unknown_function:location=PfIT_03_v3:198275-201694(+):protein_length=1139:sequence_SO=chromosome:SO=protein_coding_seq11	PFIT_0305100.1-p1	(251, 312)	PFIT_0305100.1-p1conserved_Plasmodium_protein__unknown_function	DNIKSDKINEYDNIKSDKINEYDNIESDKINDYDNIKSDKINDYDNIKSDKINDYDNIKSDK
PFIT_0305100.1-p1:transcript=PFIT_0305100.1:gene=PFIT_0305100:organism=Plasmodium_falciparum_IT:gene_product=conserved_Plasmodium_protein__unknown_function:transcript_product=conserved_Plasmodium_protein__unknown_function:location=PfIT_03_v3:198275-201694(+):protein_length=1139:sequence_SO=chromosome:SO=protein_coding_seq10	PFIT_0305100.1-p1	(226, 287)	PFIT_0305100.1-p1conserved_Plasmodium_protein__unknown_function	NDYDNIKGDKINEYDNIKSDKIYDYDNIKSDKINEYDNIKSDKINEYDNIESDKINDYDNIK
PF3D7_0924000.1-p1:transcript=PF3D7_0924000.1:gene=PF3D7_0924000:organism=Plasmodium_falciparum_3D7:gene_product=patatin-like_phospholipase__putative:transcript_product=patatin-like_phospholipase__putative:location=Pf3D7_09_v3:972548-976637(+):protein_length=1292:sequence_SO=chromosome:SO=protein_coding_seq14	PF3D7_0924000.1-p1	(326, 387)	PF3D7_0924000.1-p1patatin-like_phospholipase__putative	SHGNDISNDINKKDIHKDSQDKKKKYIILKSNSNNEKKLSSGDSDKKKQNKKKYINRIKQGI
PF3D7_1149000.1-p1:transcript=PF3D7_1149000.1:gene=PF3D7_1149000:organism=Plasmodium_falciparum_3D7:gene_product=antigen_332__DBL-like_protein:transcript_product=antigen_332__DBL-like_protein:location=Pf3D7_11_v3:1950210-1968726(+):protein_length=6093:sequence_SO=chromosome:SO=protein_coding_seq33	PF3D7_1149000.1-p1	(801, 862)	antigen_332__DBL-like_protein	NVSEEIPVEEKNVSEEIPVEEKNVSEEIPVEEENVSEEIPEGGIAIEDVPVDEETVTEEITV
PF3D7_1149000.1-p1:transcript=PF3D7_1149000.1:gene=PF3D7_1149000:organism=Plasmodium_falciparum_3D7:gene_product=antigen_332__DBL-like_protein:transcript_product=antigen_332__DBL-like_protein:location=Pf3D7_11_v3:1950210-1968726(+):protein_length=6093:sequence_SO=chromosome:SO=protein_coding_seq32	PF3D7_1149000.1-p1	(776, 837)	antigen_332__DBL-like_protein	EEKSVSEEIPVEEKSVSEEIPVEEKNVSEEIPVEEKNVSEEIPVEEKNVSEEIPVEEENVSE
PF3D7_1149000.1-p1:transcript=PF3D7_1149000.1:gene=PF3D7_1149000:organism=Plasmodium_falciparum_3D7:gene_product=antigen_332__DBL-like_protein:transcript_product=antigen_332__DBL-like_protein:location=Pf3D7_11_v3:1950210-1968726(+):protein_length=6093:sequence_SO=chromosome:SO=protein_coding_seq31	PF3D7_1149000.1-p1	(751, 812)	antigen_332__DBL-like_protein	KPVEEKSVSEEIPVEEKSVSEEIPVEEKSVSEEIPVEEKSVSEEIPVEEKNVSEEIPVEEKN
PF3D7_1149000.1-p1:transcript=PF3D7_1149000.1:gene=PF3D7_1149000:organism=Plasmodium_falciparum_3D7:gene_product=antigen_332__DBL-like_protein:transcript_product=antigen_332__DBL-like_protein:location=Pf3D7_11_v3:1950210-1968726(+):protein_length=6093:sequence_SO=chromosome:SO=protein_coding_seq30	PF3D7_1149000.1-p1	(726, 787)	antigen_332__DBL-like_protein	DEHLSSEETTVTEEDTFKGQLINEEKPVEEKSVSEEIPVEEKSVSEEIPVEEKSVSEEIPVE
PF3D7_1149000.1-p1:transcript=PF3D7_1149000.1:gene=PF3D7_1149000:organism=Plasmodium_falciparum_3D7:gene_product=antigen_332__DBL-like_protein:transcript_product=antigen_332__DBL-like_protein:location=Pf3D7_11_v3:1950210-1968726(+):protein_length=6093:sequence_SO=chromosome:SO=protein_coding_seq37	PF3D7_1149000.1-p1	(901, 962)	antigen_332__DBL-like_protein	EEIIEEKPFTEGEETESLTDEIVEEGVVTDDIPEEQIITEKVQEEEEFVTGELSEEDIINEK
PF3D7_1149000.1-p1:transcript=PF3D7_1149000.1:gene=PF3D7_1149000:organism=Plasmodium_falciparum_3D7:gene_product=antigen_332__DBL-like_protein:transcript_product=antigen_332__DBL-like_protein:location=Pf3D7_11_v3:1950210-1968726(+):protein_length=6093:sequence_SO=chromosome:SO=protein_coding_seq35	PF3D7_1149000.1-p1	(851, 912)	antigen_332__DBL-like_protein	VDEETVTEEITVDEKIYDKLPNEIETVNEEMPVEDETLTEQISSEHERVPEEIIEEKPFTEG
PF3D7_1149000.1-p1:transcript=PF3D7_1149000.1:gene=PF3D7_1149000:organism=Plasmodium_falciparum_3D7:gene_product=antigen_332__DBL-like_protein:transcript_product=antigen_332__DBL-like_protein:location=Pf3D7_11_v3:1950210-1968726(+):protein_length=6093:sequence_SO=chromosome:SO=protein_coding_seq34	PF3D7_1149000.1-p1	(826, 887)	antigen_332__DBL-like_protein	EEIPVEEENVSEEIPEGGIAIEDVPVDEETVTEEITVDEKIYDKLPNEIETVNEEMPVEDET
PF3D7_1149000.1-p1:transcript=PF3D7_1149000.1:gene=PF3D7_1149000:organism=Plasmodium_falciparum_3D7:gene_product=antigen_332__DBL-like_protein:transcript_product=antigen_332__DBL-like_protein:location=Pf3D7_11_v3:1950210-1968726(+):protein_length=6093:sequence_SO=chromosome:SO=protein_coding_seq39	PF3D7_1149000.1-p1	(951, 1012)	antigen_332__DBL-like_protein	GELSEEDIINEKVQEEDESVTEELPEEDIINEKVQEEEESAYQEIVQDGSVTKDVEYKELVN
PF3D7_1149000.1-p1:transcript=PF3D7_1149000.1:gene=PF3D7_1149000:organism=Plasmodium_falciparum_3D7:gene_product=antigen_332__DBL-like_protein:transcript_product=antigen_332__DBL-like_protein:location=Pf3D7_11_v3:1950210-1968726(+):protein_length=6093:sequence_SO=chromosome:SO=protein_coding_seq38	PF3D7_1149000.1-p1	(926, 987)	antigen_332__DBL-like_protein	GVVTDDIPEEQIITEKVQEEEEFVTGELSEEDIINEKVQEEDESVTEELPEEDIINEKVQEE
PF3D7_0910200.1-p1:transcript=PF3D7_0910200.1:gene=PF3D7_0910200:organism=Plasmodium_falciparum_3D7:gene_product=conserved_Plasmodium_protein__unknown_function:transcript_product=conserved_Plasmodium_protein__unknown_function:location=Pf3D7_09_v3:464559-473768(+):protein_length=3069:sequence_SO=chromosome:SO=protein_coding_seq9	PF3D7_0910200.1-p1	(201, 262)	PF3D7_0910200.1-p1conserved_Plasmodium_protein__unknown_function	LENQEKRNEDCYNNNNNNNIKYNLRNENFNKSIFMYDEYTSISCADDIITHVPSNYKKCDEE
PF3D7_1337500.1-p1:transcript=PF3D7_1337500.1:gene=PF3D7_1337500:organism=Plasmodium_falciparum_3D7:gene_product=conserved_Plasmodium_protein__unknown_function:transcript_product=conserved_Plasmodium_protein__unknown_function:location=Pf3D7_13_v3:1509589-1519593(-):protein_length=3334:sequence_SO=chromosome:SO=protein_coding_seq52	PF3D7_1337500.1-p1	(1276, 1337)	PF3D7_1337500.1-p1conserved_Plasmodium_protein__unknown_function	NNDKHIYNNTNNNDKHIYNNTNNNDKHIYNNTNNNDKHIYNNTNNNDKHIYNNTNNNDKHIY
PF3D7_1337500.1-p1:transcript=PF3D7_1337500.1:gene=PF3D7_1337500:organism=Plasmodium_falciparum_3D7:gene_product=conserved_Plasmodium_protein__unknown_function:transcript_product=conserved_Plasmodium_protein__unknown_function:location=Pf3D7_13_v3:1509589-1519593(-):protein_length=3334:sequence_SO=chromosome:SO=protein_coding_seq51	PF3D7_1337500.1-p1	(1251, 1312)	PF3D7_1337500.1-p1conserved_Plasmodium_protein__unknown_function	NTNNNDKHIYNNTNNNDKHIYNNTNNNDKHIYNNTNNNDKHIYNNTNNNDKHIYNNTNNNDK
PF3D7_1337500.1-p1:transcript=PF3D7_1337500.1:gene=PF3D7_1337500:organism=Plasmodium_falciparum_3D7:gene_product=conserved_Plasmodium_protein__unknown_function:transcript_product=conserved_Plasmodium_protein__unknown_function:location=Pf3D7_13_v3:1509589-1519593(-):protein_length=3334:sequence_SO=chromosome:SO=protein_coding_seq50	PF3D7_1337500.1-p1	(1226, 1287)	PF3D7_1337500.1-p1conserved_Plasmodium_protein__unknown_function	IYNNMNNNDKDIYNNTNNNDKHIYNNTNNNDKHIYNNTNNNDKHIYNNTNNNDKHIYNNTNN
PF3D7_1337500.1-p1:transcript=PF3D7_1337500.1:gene=PF3D7_1337500:organism=Plasmodium_falciparum_3D7:gene_product=conserved_Plasmodium_protein__unknown_function:transcript_product=conserved_Plasmodium_protein__unknown_function:location=Pf3D7_13_v3:1509589-1519593(-):protein_length=3334:sequence_SO=chromosome:SO=protein_coding_seq54	PF3D7_1337500.1-p1	(1326, 1387)	PF3D7_1337500.1-p1conserved_Plasmodium_protein__unknown_function	YNNTNNNDKHIYNNTNNNDKHIYNNTNIREKDNDVIYHEIVTRCCRNNTCTCFINNNDSVDV
PFIT_1024700.1-p1:transcript=PFIT_1024700.1:gene=PFIT_1024700:organism=Plasmodium_falciparum_IT:gene_product=conserved_Plasmodium_protein__unknown_function:transcript_product=conserved_Plasmodium_protein__unknown_function:location=PfIT_10_v3:990981-992183(-):protein_length=400:sequence_SO=chromosome:SO=protein_coding_seq6	PFIT_1024700.1-p1	(126, 187)	PFIT_1024700.1-p1conserved_Plasmodium_protein__unknown_function	NKGDNKYNNKGDNKYNNKGDSEYNKCDSEYNKCDSEYNKCDSEYNNKGDNKYNNKDYSEYNK
PF3D7_0404900.1-p1:transcript=PF3D7_0404900.1:gene=PF3D7_0404900:organism=Plasmodium_falciparum_3D7:gene_product=6-cysteine_protein:transcript_product=6-cysteine_protein:location=Pf3D7_04_v3:267244-268380(-):protein_length=378:sequence_SO=chromosome:SO=protein_coding_seq8	PF3D7_0404900.1-p1	(176, 237)	6-cysteine_protein	FNDQADNTTKLNLPKSLNIPNDILNYDVYNSSNNRNDIVVKDEVTNKQIISKRGIMSVFVRS
PFIT_bin00900.1-p1:transcript=PFIT_bin00900.1:gene=PFIT_bin00900:organism=Plasmodium_falciparum_IT:gene_product=erythrocyte_membrane_protein_1__PfEMP1:transcript_product=erythrocyte_membrane_protein_1__PfEMP1:location=PfIT_bin_v3_archived_contig_5:17799-27923(+):protein_length=3071:sequence_SO=random_sequence:SO=protein_coding_seq121	PFIT_bin00900.1-p1	(3001, 3062)	var	MDTILDDLDKPFNEPYYYDMYDDDIYYDVHDHDTPTVDTNAVDVPSKVQIEMDVNTKLVKEK
PF3D7_1442600.1-p1:transcript=PF3D7_1442600.1:gene=PF3D7_1442600:organism=Plasmodium_falciparum_3D7:gene_product=TRAP-like_protein:transcript_product=TRAP-like_protein:location=Pf3D7_14_v3:1730087-1740916(+):protein_length=3543:sequence_SO=chromosome:SO=protein_coding_seq114	PF3D7_1442600.1-p1	(2826, 2887)	TRAP-like_protein	NDKKFEEGNDKEIKEGNDKEIKEGDYKKFEEEIEKQIEEGNDKEIEEEIEKKIEEANDKKFE
PF3D7_1442600.1-p1:transcript=PF3D7_1442600.1:gene=PF3D7_1442600:organism=Plasmodium_falciparum_3D7:gene_product=TRAP-like_protein:transcript_product=TRAP-like_protein:location=Pf3D7_14_v3:1730087-1740916(+):protein_length=3543:sequence_SO=chromosome:SO=protein_coding_seq115	PF3D7_1442600.1-p1	(2851, 2912)	TRAP-like_protein	YKKFEEEIEKQIEEGNDKEIEEEIEKKIEEANDKKFEEGNDKEIKEGNEKEINEGNDKEIKE
PF3D7_1442600.1-p1:transcript=PF3D7_1442600.1:gene=PF3D7_1442600:organism=Plasmodium_falciparum_3D7:gene_product=TRAP-like_protein:transcript_product=TRAP-like_protein:location=Pf3D7_14_v3:1730087-1740916(+):protein_length=3543:sequence_SO=chromosome:SO=protein_coding_seq113	PF3D7_1442600.1-p1	(2801, 2862)	TRAP-like_protein	GNEEEINEGNEKEIKEGNEKEIKEGNDKKFEEGNDKEIKEGNDKEIKEGDYKKFEEEIEKQI
PF3D7_1442600.1-p1:transcript=PF3D7_1442600.1:gene=PF3D7_1442600:organism=Plasmodium_falciparum_3D7:gene_product=TRAP-like_protein:transcript_product=TRAP-like_protein:location=Pf3D7_14_v3:1730087-1740916(+):protein_length=3543:sequence_SO=chromosome:SO=protein_coding_seq119	PF3D7_1442600.1-p1	(2951, 3012)	TRAP-like_protein	EEGNDKEIEEEIEKKIEEANEKKIKEENDKKFEEGNDKEVKEENDKEVKKGNDKEFEEGNDK
PF3D7_0801900.1-p1:transcript=PF3D7_0801900.1:gene=PF3D7_0801900:organism=Plasmodium_falciparum_3D7:gene_product=conserved_Plasmodium_protein__unknown_function:transcript_product=conserved_Plasmodium_protein__unknown_function:location=Pf3D7_08_v3:128849-142837(+):protein_length=4662:sequence_SO=chromosome:SO=protein_coding_seq48	PF3D7_0801900.1-p1	(1176, 1237)	PF3D7_0801900.1-p1conserved_Plasmodium_protein__unknown_function	KKKINKNKIMENNNTNVNNNNTNVGNTNKIIKNNEQLFFKTNTAYINNSDNISNYLLDNIEL
AAC47438_seq89	AAC47438	(2201, 2262)	var	YIYLEGDSGTDSGYTDHYSDITSSSESEYEEMDINDIYVPGSPKYKTLIEVVLEPSGKLSGN
PF3D7_0501700.1-p1:transcript=PF3D7_0501700.1:gene=PF3D7_0501700:organism=Plasmodium_falciparum_3D7:gene_product=anaphase_promoting_complex_subunit__putative:transcript_product=anaphase_promoting_complex_subunit__putative:location=Pf3D7_05_v3:86820-89201(-):protein_length=793:sequence_SO=chromosome:SO=protein_coding_seq13	PF3D7_0501700.1-p1	(301, 362)	PF3D7_0501700.1-p1anaphase_promoting_complex_subunit__putative	DRKDDNNDDYYDNEYKEKMDDYRHNDEKKVEEKNKDGDINLKEMEDLVSNDKDSDELDEFDE
PFIT_0215500.1-p1:transcript=PFIT_0215500.1:gene=PFIT_0215500:organism=Plasmodium_falciparum_IT:gene_product=conserved_Plasmodium_protein__unknown_function:transcript_product=conserved_Plasmodium_protein__unknown_function:location=PfIT_02_v3:609545-613108(-):protein_length=1187:sequence_SO=chromosome:SO=protein_coding_seq28	PFIT_0215500.1-p1	(676, 737)	PFIT_0215500.1-p1conserved_Plasmodium_protein__unknown_function	KKKNNVGNIHKHNVMMTSNHNNILFRSFEYVKVHKLLLFINILIKSNIYINYEWSLYFLSLI
PF3D7_1417200.1-p1:transcript=PF3D7_1417200.1:gene=PF3D7_1417200:organism=Plasmodium_falciparum_3D7:gene_product=NOT_family_protein__putative:transcript_product=NOT_family_protein__putative:location=Pf3D7_14_v3:694585-708177(+):protein_length=4466:sequence_SO=chromosome:SO=protein_coding_seq154	PF3D7_1417200.1-p1	(3826, 3887)	PF3D7_1417200.1-p1NOT_family_protein__putative	VNIALYNLEKDNMLQEELFERIQNKENNENELMDDDMKEKNDVKNVYTPLYDDEKKDMNKEQ
PFIT_1021400.1-p1:transcript=PFIT_1021400.1:gene=PFIT_1021400:organism=Plasmodium_falciparum_IT:gene_product=conserved_Plasmodium_protein_(10b_antigen)__unknown_function:transcript_product=conserved_Plasmodium_protein_(10b_antigen)__unknown_function:location=PfIT_10_v3:840446-847246(-):protein_length=2266:sequence_SO=chromosome:SO=protein_coding_seq32	PFIT_1021400.1-p1	(776, 837)	PFIT_1021400.1-p1conserved_Plasmodium_protein_(10b_antigen)__unknown_function	NNNMEQNTNNNNMYNHNSYANYKHEHLSLNVYEGPLEKNNEWGKKKMNKKNNQSGMNQQNVM
PF3D7_0102200.1-p1:transcript=PF3D7_0102200.1:gene=PF3D7_0102200:organism=Plasmodium_falciparum_3D7:gene_product=ring-infected_erythrocyte_surface_antigen:transcript_product=ring-infected_erythrocyte_surface_antigen:location=Pf3D7_01_v3:98819-102282(+):protein_length=1085:sequence_SO=chromosome:SO=protein_coding_seq36	PF3D7_0102200.1-p1	(876, 937)	ring-infected_erythrocyte_surface_antigen	EMKNQNENVPEHVQHNAEANVEHDAEENVEHDAEENVEENVEENVEENVEENVEENVEENVE
PF3D7_0102200.1-p1:transcript=PF3D7_0102200.1:gene=PF3D7_0102200:organism=Plasmodium_falciparum_3D7:gene_product=ring-infected_erythrocyte_surface_antigen:transcript_product=ring-infected_erythrocyte_surface_antigen:location=Pf3D7_01_v3:98819-102282(+):protein_length=1085:sequence_SO=chromosome:SO=protein_coding_seq37	PF3D7_0102200.1-p1	(901, 962)	ring-infected_erythrocyte_surface_antigen	EENVEHDAEENVEENVEENVEENVEENVEENVEENVEENVEENVEENVEENVEENVEENVEE
PF3D7_1429200.1-p1:transcript=PF3D7_1429200.1:gene=PF3D7_1429200:organism=Plasmodium_falciparum_3D7:gene_product=AP2_domain_transcription_factor_AP2-O3__putative:transcript_product=AP2_domain_transcription_factor_AP2-O3__putative:location=Pf3D7_14_v3:1144518-1148078(-):protein_length=1186:sequence_SO=chromosome:SO=protein_coding_seq40	PF3D7_1429200.1-p1	(976, 1037)	PF3D7_1429200.1-p1AP2_domain_transcription_factor_AP2-O3__putative	LERRRECKDETEKSNEKNILNEENILNENEKSNEKEKSNEKEKSNEKNILNEENILNEENKS
PFIT_0721900.1-p1:transcript=PFIT_0721900.1:gene=PFIT_0721900:organism=Plasmodium_falciparum_IT:gene_product=metallo-hydrolase/oxidoreductase__putative:transcript_product=metallo-hydrolase/oxidoreductase__putative:location=PfIT_07_v3:972544-975555(+):protein_length=1003:sequence_SO=chromosome:SO=protein_coding_seq7	PFIT_0721900.1-p1	(151, 212)	PFIT_0721900.1-p1metallo-hydrolase/oxidoreductase__putative	EDDNKKYEQENRENNNNNNVEKDIQVDVTNNLLSKDNYFIDKKKKNIINSYIEEMDKFLETY
PF3D7_1449700.1-p1:transcript=PF3D7_1449700.1:gene=PF3D7_1449700:organism=Plasmodium_falciparum_3D7:gene_product=exosome_complex_exonuclease_RRP6:transcript_product=exosome_complex_exonuclease_RRP6:location=Pf3D7_14_v3:2038132-2041542(-):protein_length=1136:sequence_SO=chromosome:SO=protein_coding_seq44	PF3D7_1449700.1-p1	(1076, 1137)	exosome_complex_exonuclease_RRP6	SNDNYNENIKKSSVVKKSIDKNIHNNNKKKDKHIYQSYNQQYNIKKTKGLYSKNILSEIDRK
PF3D7_0515300.1-p1:transcript=PF3D7_0515300.1:gene=PF3D7_0515300:organism=Plasmodium_falciparum_3D7:gene_product=phosphatidylinositol_3-kinase:transcript_product=phosphatidylinositol_3-kinase:location=Pf3D7_05_v3:628981-635382(+):protein_length=2133:sequence_SO=chromosome:SO=protein_coding_seq58	PF3D7_0515300.1-p1	(1426, 1487)	phosphatidylinositol_3-kinase	VYGDDNKNIYGDDSKNIYGDDNKNIFSDDNKNLYSDNNNNKHIRYNKYVKNISYEHFNEYPY
PF3D7_1004200.1-p1:transcript=PF3D7_1004200.1:gene=PF3D7_1004200:organism=Plasmodium_falciparum_3D7:gene_product=WD_repeat-containing_protein__putative:transcript_product=WD_repeat-containing_protein__putative:location=Pf3D7_10_v3:187669-196954(-):protein_length=3013:sequence_SO=chromosome:SO=protein_coding_seq15	PF3D7_1004200.1-p1	(351, 412)	PF3D7_1004200.1-p1WD_repeat-containing_protein__putative	DIDDKNYSSSYGSDDNNMYNMNSMYDYLNNNMSSDPQESNIYINSKNKNYGYNKLDRDKYND
RAJ116var18_seq30	RAJ116var18	(726, 787)	var	EGFDKKGVNGIPVGGGLGMTADVVLEGVLELEFSNENTEQDTQNNVSAEEAEEIKHLRDIIK
PFCLINvar71_seq12	PFCLINvar71	(276, 337)	var	DNVPTNLDYVPQHLRWFEEWAEDFCRKKKKKVENLDTQCRGVNSSGEPRYCSRNGYDCEKTK
PF3D7_1038400.1-p1:transcript=PF3D7_1038400.1:gene=PF3D7_1038400:organism=Plasmodium_falciparum_3D7:gene_product=gametocyte-specific_protein:transcript_product=gametocyte-specific_protein:location=Pf3D7_10_v3:1519021-1547825(+):protein_length=9563:sequence_SO=chromosome:SO=protein_coding_seq208	PF3D7_1038400.1-p1	(5176, 5237)	gametocyte-specific_protein	VVPEELVEKVLPEELVEEVVPEELIEEVVTEEVIEEIIPEEIIEEIIPEEVVEERVSIEVVE
PF3D7_1038400.1-p1:transcript=PF3D7_1038400.1:gene=PF3D7_1038400:organism=Plasmodium_falciparum_3D7:gene_product=gametocyte-specific_protein:transcript_product=gametocyte-specific_protein:location=Pf3D7_10_v3:1519021-1547825(+):protein_length=9563:sequence_SO=chromosome:SO=protein_coding_seq209	PF3D7_1038400.1-p1	(5201, 5262)	gametocyte-specific_protein	EEVVTEEVIEEIIPEEIIEEIIPEEVVEERVSIEVVEELVPEELIEEVVAEEIFEEVVPEKL
PF3D7_1038400.1-p1:transcript=PF3D7_1038400.1:gene=PF3D7_1038400:organism=Plasmodium_falciparum_3D7:gene_product=gametocyte-specific_protein:transcript_product=gametocyte-specific_protein:location=Pf3D7_10_v3:1519021-1547825(+):protein_length=9563:sequence_SO=chromosome:SO=protein_coding_seq202	PF3D7_1038400.1-p1	(5026, 5087)	gametocyte-specific_protein	IEEVVPEEVIEEVITEEVVEEVIPEELVEEVIPEISVEVEIPEVLVEEVIPEKLVKVVPEEL
PF3D7_1038400.1-p1:transcript=PF3D7_1038400.1:gene=PF3D7_1038400:organism=Plasmodium_falciparum_3D7:gene_product=gametocyte-specific_protein:transcript_product=gametocyte-specific_protein:location=Pf3D7_10_v3:1519021-1547825(+):protein_length=9563:sequence_SO=chromosome:SO=protein_coding_seq203	PF3D7_1038400.1-p1	(5051, 5112)	gametocyte-specific_protein	ELVEEVIPEISVEVEIPEVLVEEVIPEKLVKVVPEELVEEVIPEELVEEVITEALVEEVVDV
PF3D7_1038400.1-p1:transcript=PF3D7_1038400.1:gene=PF3D7_1038400:organism=Plasmodium_falciparum_3D7:gene_product=gametocyte-specific_protein:transcript_product=gametocyte-specific_protein:location=Pf3D7_10_v3:1519021-1547825(+):protein_length=9563:sequence_SO=chromosome:SO=protein_coding_seq200	PF3D7_1038400.1-p1	(4976, 5037)	gametocyte-specific_protein	VPEEIVEKVVPEEVVEEVVAEEIIEEVITEEVVEEIVPGEVVEEMVPEEIIEEVVPEEVIEE
PF3D7_1038400.1-p1:transcript=PF3D7_1038400.1:gene=PF3D7_1038400:organism=Plasmodium_falciparum_3D7:gene_product=gametocyte-specific_protein:transcript_product=gametocyte-specific_protein:location=Pf3D7_10_v3:1519021-1547825(+):protein_length=9563:sequence_SO=chromosome:SO=protein_coding_seq201	PF3D7_1038400.1-p1	(5001, 5062)	gametocyte-specific_protein	EVITEEVVEEIVPGEVVEEMVPEEIIEEVVPEEVIEEVITEEVVEEVIPEELVEEVIPEISV
PF3D7_1038400.1-p1:transcript=PF3D7_1038400.1:gene=PF3D7_1038400:organism=Plasmodium_falciparum_3D7:gene_product=gametocyte-specific_protein:transcript_product=gametocyte-specific_protein:location=Pf3D7_10_v3:1519021-1547825(+):protein_length=9563:sequence_SO=chromosome:SO=protein_coding_seq206	PF3D7_1038400.1-p1	(5126, 5187)	gametocyte-specific_protein	EVVEEVIPEEVVEEMVPEEVVEEVVPEELVEEVIPEEVVEKVVPEQLVEKVVPEELVEKVLP
PF3D7_1038400.1-p1:transcript=PF3D7_1038400.1:gene=PF3D7_1038400:organism=Plasmodium_falciparum_3D7:gene_product=gametocyte-specific_protein:transcript_product=gametocyte-specific_protein:location=Pf3D7_10_v3:1519021-1547825(+):protein_length=9563:sequence_SO=chromosome:SO=protein_coding_seq207	PF3D7_1038400.1-p1	(5151, 5212)	gametocyte-specific_protein	PEELVEEVIPEEVVEKVVPEQLVEKVVPEELVEKVLPEELVEEVVPEELIEEVVTEEVIEEI
PF3D7_1038400.1-p1:transcript=PF3D7_1038400.1:gene=PF3D7_1038400:organism=Plasmodium_falciparum_3D7:gene_product=gametocyte-specific_protein:transcript_product=gametocyte-specific_protein:location=Pf3D7_10_v3:1519021-1547825(+):protein_length=9563:sequence_SO=chromosome:SO=protein_coding_seq204	PF3D7_1038400.1-p1	(5076, 5137)	gametocyte-specific_protein	PEKLVKVVPEELVEEVIPEELVEEVITEALVEEVVDVVVPEEIFEEVLPEEVVEEVIPEEVV
PF3D7_1038400.1-p1:transcript=PF3D7_1038400.1:gene=PF3D7_1038400:organism=Plasmodium_falciparum_3D7:gene_product=gametocyte-specific_protein:transcript_product=gametocyte-specific_protein:location=Pf3D7_10_v3:1519021-1547825(+):protein_length=9563:sequence_SO=chromosome:SO=protein_coding_seq205	PF3D7_1038400.1-p1	(5101, 5162)	gametocyte-specific_protein	ITEALVEEVVDVVVPEEIFEEVLPEEVVEEVIPEEVVEEMVPEEVVEEVVPEELVEEVIPEE
PFIT_0914400.1-p1:transcript=PFIT_0914400.1:gene=PFIT_0914400:organism=Plasmodium_falciparum_IT:gene_product=met-10+_like_protein__putative:transcript_product=met-10+_like_protein__putative:location=PfIT_09_v3:594505-596989(-):protein_length=771:sequence_SO=chromosome:SO=protein_coding_seq24	PFIT_0914400.1-p1	(576, 637)	PFIT_0914400.1-p1met-10+_like_protein__putative	ENKNENKNENKNENKKDIQNNNMCEKENNISDRKCPYIHNNNNQRNITCDNNNNNNNMNVSG
PF3D7_0900600.1-p1:transcript=PF3D7_0900600.1:gene=PF3D7_0900600:organism=Plasmodium_falciparum_3D7:gene_product=rifin:transcript_product=rifin:location=Pf3D7_09_v3:45902-47236(-):protein_length=367:sequence_SO=chromosome:SO=protein_coding_seq3	PF3D7_0900600.1-p1	(51, 112)	rifin	NDPQMKAVMENYNRQTSDRFKEYDERMQGKRQKCKEQCDKEIQKIVLKDKIDKELTEKFATL
PF3D7_0411800.1-p1:transcript=PF3D7_0411800.1:gene=PF3D7_0411800:organism=Plasmodium_falciparum_3D7:gene_product=conserved_Plasmodium_protein__unknown_function:transcript_product=conserved_Plasmodium_protein__unknown_function:location=Pf3D7_04_v3:519832-525618(-):protein_length=1928:sequence_SO=chromosome:SO=protein_coding_seq44	PF3D7_0411800.1-p1	(1076, 1137)	PF3D7_0411800.1-p1conserved_Plasmodium_protein__unknown_function	DMYNKNKNLDDQTNNQMDNQKDDQTNNQMDNQNDDQTNNQKNNQINNQTNNQMDEQMEHVNR
PF3D7_0935900.1-p1:transcript=PF3D7_0935900.1:gene=PF3D7_0935900:organism=Plasmodium_falciparum_3D7:gene_product=ring-exported_protein_1:transcript_product=ring-exported_protein_1:location=Pf3D7_09_v3:1420483-1422807(-):protein_length=713:sequence_SO=chromosome:SO=protein_coding_seq23	PF3D7_0935900.1-p1	(551, 612)	ring-exported_protein_1	KEVKPQAEKDALAKTENQSGELLTQAEKDALAKKESEAPKGSSTSDKNTTENQLNAEAQSEV
PF3D7_0935900.1-p1:transcript=PF3D7_0935900.1:gene=PF3D7_0935900:organism=Plasmodium_falciparum_3D7:gene_product=ring-exported_protein_1:transcript_product=ring-exported_protein_1:location=Pf3D7_09_v3:1420483-1422807(-):protein_length=713:sequence_SO=chromosome:SO=protein_coding_seq22	PF3D7_0935900.1-p1	(526, 587)	ring-exported_protein_1	ENQNGELLPQAEKDASKLTTTYDQTKEVKPQAEKDALAKTENQSGELLTQAEKDALAKKESE
PF3D7_0708400.1-p1:transcript=PF3D7_0708400.1:gene=PF3D7_0708400:organism=Plasmodium_falciparum_3D7:gene_product=heat_shock_protein_90:transcript_product=heat_shock_protein_90:location=Pf3D7_07_v3:381592-384614(+):protein_length=745:sequence_SO=chromosome:SO=protein_coding_seq10	PF3D7_0708400.1-p1	(226, 287)	heat_shock_protein_90	EGEGEREGEEEEEKKKKTGEDKNADESKEENEDEEKKEDNEEDDNKTDHPKVEDVTEELENA
PF3D7_1335100.1-p1:transcript=PF3D7_1335100.1:gene=PF3D7_1335100:organism=Plasmodium_falciparum_3D7:gene_product=merozoite_surface_protein_7:transcript_product=merozoite_surface_protein_7:location=Pf3D7_13_v3:1419086-1420141(-):protein_length=351:sequence_SO=chromosome:SO=protein_coding_seq7	PF3D7_1335100.1-p1	(151, 212)	merozoite_surface_protein_7	EKSESFPLFQNLGLFGKNVLSKVKAQSETDTQSKNEQEISTQGQEVQKPAQGGESTFQKDLD
PF3D7_0935900.1-p1:transcript=PF3D7_0935900.1:gene=PF3D7_0935900:organism=Plasmodium_falciparum_3D7:gene_product=ring-exported_protein_1:transcript_product=ring-exported_protein_1:location=Pf3D7_09_v3:1420483-1422807(-):protein_length=713:sequence_SO=chromosome:SO=protein_coding_seq27	PF3D7_0935900.1-p1	(651, 712)	ring-exported_protein_1	EAQQEVKSPYEKYSYNKETKPQNDKYTLNKEVKPQNEKYTYNQKVKAENTESEKSLLESSVF
PF3D7_0935900.1-p1:transcript=PF3D7_0935900.1:gene=PF3D7_0935900:organism=Plasmodium_falciparum_3D7:gene_product=ring-exported_protein_1:transcript_product=ring-exported_protein_1:location=Pf3D7_09_v3:1420483-1422807(-):protein_length=713:sequence_SO=chromosome:SO=protein_coding_seq28	PF3D7_0935900.1-p1	(676, 737)	ring-exported_protein_1	AQQEVKSPYEKYSYNKETKPQNDKYTLNKEVKPQNEKYTYNQKVKAENTESEKSLLESSVFN
PFIT_1125750.1-p1:transcript=PFIT_1125750.1:gene=PFIT_1125750:organism=Plasmodium_falciparum_IT:gene_product=hypothetical_protein:transcript_product=hypothetical_protein:location=PfIT_11_v3:914213-918348(+):protein_length=1377:sequence_SO=chromosome:SO=protein_coding_seq12	PFIT_1125750.1-p1	(276, 337)	hypothetical_protein	EDIQKEILNELNEDIQKEILNELNEDIQKYVHKIKEIKTDANLKKQKYREKIKDDNIKSKNN
PF3D7_0905300.1-p1:transcript=PF3D7_0905300.1:gene=PF3D7_0905300:organism=Plasmodium_falciparum_3D7:gene_product=dynein_heavy_chain__putative:transcript_product=dynein_heavy_chain__putative:location=Pf3D7_09_v3:251353-269709(-):protein_length=6118:sequence_SO=chromosome:SO=protein_coding_seq90	PF3D7_0905300.1-p1	(2226, 2287)	PF3D7_0905300.1-p1dynein_heavy_chain__putative	DEEIISKKDISFQDGGLLEESAYLDEEEYINNLNKLDLDNMDFFIKDIINYHLLKKKDDILD
PF3D7_1412200.1-p1:transcript=PF3D7_1412200.1:gene=PF3D7_1412200:organism=Plasmodium_falciparum_3D7:gene_product=conserved_Plasmodium_protein__unknown_function:transcript_product=conserved_Plasmodium_protein__unknown_function:location=Pf3D7_14_v3:487776-490380(-):protein_length=760:sequence_SO=chromosome:SO=protein_coding_seq13	PF3D7_1412200.1-p1	(301, 362)	PF3D7_1412200.1-p1conserved_Plasmodium_protein__unknown_function	SLIFDTTENEKGKKISKNYNDSIMSEDKDSNSSLDVQTNVNKMYSDDKSKRKYSNESKDLRI
PFIT_1228100.1-p1:transcript=PFIT_1228100.1:gene=PFIT_1228100:organism=Plasmodium_falciparum_IT:gene_product=conserved_Plasmodium_protein__unknown_function:transcript_product=conserved_Plasmodium_protein__unknown_function:location=PfIT_12_v3:1105266-1109135(+):protein_length=1289:sequence_SO=chromosome:SO=protein_coding_seq43	PFIT_1228100.1-p1	(1051, 1112)	PFIT_1228100.1-p1conserved_Plasmodium_protein__unknown_function	CDNNLSTHIEEKENIKKCTDNIFNDTFFIFNENSDLYTNEEYKKNRIYSINNKNNINEYVKN
PF3D7_1013200.1-p1:transcript=PF3D7_1013200.1:gene=PF3D7_1013200:organism=Plasmodium_falciparum_3D7:gene_product=conserved_Plasmodium_protein__unknown_function:transcript_product=conserved_Plasmodium_protein__unknown_function:location=Pf3D7_10_v3:511084-514278(+):protein_length=1064:sequence_SO=chromosome:SO=protein_coding_seq11	PF3D7_1013200.1-p1	(251, 312)	PF3D7_1013200.1-p1conserved_Plasmodium_protein__unknown_function	HNNNSNKINDNQNNDKTKGDDNYNTTNNNTNYHVNFHNNKSNRNNYYAYYFYSKKPNNIENN
PF3D7_1013200.1-p1:transcript=PF3D7_1013200.1:gene=PF3D7_1013200:organism=Plasmodium_falciparum_3D7:gene_product=conserved_Plasmodium_protein__unknown_function:transcript_product=conserved_Plasmodium_protein__unknown_function:location=Pf3D7_10_v3:511084-514278(+):protein_length=1064:sequence_SO=chromosome:SO=protein_coding_seq12	PF3D7_1013200.1-p1	(276, 337)	PF3D7_1013200.1-p1conserved_Plasmodium_protein__unknown_function	TNNNTNYHVNFHNNKSNRNNYYAYYFYSKKPNNIENNEESNCDNNSVNKENSNGVKDASKED
PF3D7_0400100.1-p1:transcript=PF3D7_0400100.1:gene=PF3D7_0400100:organism=Plasmodium_falciparum_3D7:gene_product=erythrocyte_membrane_protein_1__PfEMP1:transcript_product=erythrocyte_membrane_protein_1__PfEMP1:location=Pf3D7_04_v3:28706-37677(+):protein_length=2646:sequence_SO=chromosome:SO=protein_coding_seq29	PF3D7_0400100.1-p1	(701, 762)	var	IKDHFGKQKDIIEQTGCDAGVTLAAVLKLEFLNEDTEEKSEKGLDAEEAKEIKHLRQMLEQA
PFI0005w_D2_seq14	PFI0005w_D2	(326, 387)	var	IDNQKKEFLKQKRKYKTEISGGDGGGSSRKKRVARSSSSSDDNGYESKFYKKLKEVGYQDVD
PF3D7_0317700.1-p1:transcript=PF3D7_0317700.1:gene=PF3D7_0317700:organism=Plasmodium_falciparum_3D7:gene_product=CPSF_(cleavage_and_polyadenylation_specific_factor)__subunit_A__putative:transcript_product=CPSF_(cleavage_and_polyadenylation_specific_factor)__subunit_A__putative:location=Pf3D7_03_v3:728259-738076(+):protein_length=2870:sequence_SO=chromosome:SO=protein_coding_seq75	PF3D7_0317700.1-p1	(1851, 1912)	PF3D7_0317700.1-p1CPSF_(cleavage_and_polyadenylation_specific_factor)__subunit_A__putative	KENVGDNIKENVGDNIKENVGDNIKENVGDNIKENVGDNIKENVGDNDNVSNNSYTNYSNSN
PF3D7_0317700.1-p1:transcript=PF3D7_0317700.1:gene=PF3D7_0317700:organism=Plasmodium_falciparum_3D7:gene_product=CPSF_(cleavage_and_polyadenylation_specific_factor)__subunit_A__putative:transcript_product=CPSF_(cleavage_and_polyadenylation_specific_factor)__subunit_A__putative:location=Pf3D7_03_v3:728259-738076(+):protein_length=2870:sequence_SO=chromosome:SO=protein_coding_seq74	PF3D7_0317700.1-p1	(1826, 1887)	PF3D7_0317700.1-p1CPSF_(cleavage_and_polyadenylation_specific_factor)__subunit_A__putative	IKEYVGDNIKENVGDNIKENVGDNIKENVGDNIKENVGDNIKENVGDNIKENVGDNIKENVG
PF3D7_0317700.1-p1:transcript=PF3D7_0317700.1:gene=PF3D7_0317700:organism=Plasmodium_falciparum_3D7:gene_product=CPSF_(cleavage_and_polyadenylation_specific_factor)__subunit_A__putative:transcript_product=CPSF_(cleavage_and_polyadenylation_specific_factor)__subunit_A__putative:location=Pf3D7_03_v3:728259-738076(+):protein_length=2870:sequence_SO=chromosome:SO=protein_coding_seq72	PF3D7_0317700.1-p1	(1776, 1837)	PF3D7_0317700.1-p1CPSF_(cleavage_and_polyadenylation_specific_factor)__subunit_A__putative	DNIKENVGDNIKENVGDNIKENVGDNIKENVGDNIKENVGDNIKENVGDNIKEYVGDNIKEN
PFI0005w_D2_seq15	PFI0005w_D2	(351, 412)	var	GSSRKKRVARSSSSSDDNGYESKFYKKLKEVGYQDVDSFLEKLNNEEICKKITDEKENIDFK
PFIT_0214000.1-p1:transcript=PFIT_0214000.1:gene=PFIT_0214000:organism=Plasmodium_falciparum_IT:gene_product=serine/threonine_protein_kinase__putative:transcript_product=serine/threonine_protein_kinase__putative:location=PfIT_02_v3:539296-544461(+):protein_length=1721:sequence_SO=chromosome:SO=protein_coding_seq47	PFIT_0214000.1-p1	(1151, 1212)	PFIT_0214000.1-p1serine/threonine_protein_kinase__putative	YEGKRKNKYTYYNNYYKINGKNEIHDDYNIKSHGSRINYNIFNIKDNKHNNNDKGEKSCELK
PF3D7_1134200.1-p1:transcript=PF3D7_1134200.1:gene=PF3D7_1134200:organism=Plasmodium_falciparum_3D7:gene_product=conserved_Plasmodium_protein__unknown_function:transcript_product=conserved_Plasmodium_protein__unknown_function:location=Pf3D7_11_v3:1326747-1332164(+):protein_length=1805:sequence_SO=chromosome:SO=protein_coding_seq67	PF3D7_1134200.1-p1	(1651, 1712)	PF3D7_1134200.1-p1conserved_Plasmodium_protein__unknown_function	KFFMKQKKNKSKSNMKQDDYYTDSDQEENVQMNTDGKIIIRLDDDNSFSNNKKKKNHDEISQ
PFIT_0308800.1-p1:transcript=PFIT_0308800.1:gene=PFIT_0308800:organism=Plasmodium_falciparum_IT:gene_product=splicing_factor_3B_subunit_1__putative:transcript_product=splicing_factor_3B_subunit_1__putative:location=PfIT_03_v3:325094-329188(-):protein_length=1364:sequence_SO=chromosome:SO=protein_coding_seq9	PFIT_0308800.1-p1	(201, 262)	PFIT_0308800.1-p1splicing_factor_3B_subunit_1__putative	HDDDNNNYNNTDDANSNDSDADILRGMKNEKNEKKKITNNLKSKWDVVKHEKNNLNMSNMPT
PFIT_0308800.1-p1:transcript=PFIT_0308800.1:gene=PFIT_0308800:organism=Plasmodium_falciparum_IT:gene_product=splicing_factor_3B_subunit_1__putative:transcript_product=splicing_factor_3B_subunit_1__putative:location=PfIT_03_v3:325094-329188(-):protein_length=1364:sequence_SO=chromosome:SO=protein_coding_seq8	PFIT_0308800.1-p1	(176, 237)	PFIT_0308800.1-p1splicing_factor_3B_subunit_1__putative	YNKQGDSTNDTKEKMENENSHGGNSHDDDNNNYNNTDDANSNDSDADILRGMKNEKNEKKKI
PFIT_0308800.1-p1:transcript=PFIT_0308800.1:gene=PFIT_0308800:organism=Plasmodium_falciparum_IT:gene_product=splicing_factor_3B_subunit_1__putative:transcript_product=splicing_factor_3B_subunit_1__putative:location=PfIT_03_v3:325094-329188(-):protein_length=1364:sequence_SO=chromosome:SO=protein_coding_seq5	PFIT_0308800.1-p1	(101, 162)	PFIT_0308800.1-p1splicing_factor_3B_subunit_1__putative	KDHMNDIDLGLTKDKSIKKRENAFQKKKYDYTLSPQRADPFADKSPSPGERTYTDIMLENKK
PFIT_0308800.1-p1:transcript=PFIT_0308800.1:gene=PFIT_0308800:organism=Plasmodium_falciparum_IT:gene_product=splicing_factor_3B_subunit_1__putative:transcript_product=splicing_factor_3B_subunit_1__putative:location=PfIT_03_v3:325094-329188(-):protein_length=1364:sequence_SO=chromosome:SO=protein_coding_seq6	PFIT_0308800.1-p1	(126, 187)	PFIT_0308800.1-p1splicing_factor_3B_subunit_1__putative	KKKYDYTLSPQRADPFADKSPSPGERTYTDIMLENKKKSKMKEASRKLSHYNKQGDSTNDTK
PFIT_0702900.1-p1:transcript=PFIT_0702900.1:gene=PFIT_0702900:organism=Plasmodium_falciparum_IT:gene_product=conserved_Plasmodium_membrane_protein__unknown_function:transcript_product=conserved_Plasmodium_membrane_protein__unknown_function:location=PfIT_07_v3:199240-208971(-):protein_length=3243:sequence_SO=chromosome:SO=protein_coding_seq63	PFIT_0702900.1-p1	(1551, 1612)	PFIT_0702900.1-p1conserved_Plasmodium_membrane_protein__unknown_function	DTNVSDDKKKKNNNNINVDGINNFDQYEGNLLYNNIHRNDDNKKKTKKVLNNNSNNNKKNRK
PFIT_0702900.1-p1:transcript=PFIT_0702900.1:gene=PFIT_0702900:organism=Plasmodium_falciparum_IT:gene_product=conserved_Plasmodium_membrane_protein__unknown_function:transcript_product=conserved_Plasmodium_membrane_protein__unknown_function:location=PfIT_07_v3:199240-208971(-):protein_length=3243:sequence_SO=chromosome:SO=protein_coding_seq62	PFIT_0702900.1-p1	(1526, 1587)	PFIT_0702900.1-p1conserved_Plasmodium_membrane_protein__unknown_function	KKIMSNELFIVHVENINQKLSNYSDDTNVSDDKKKKNNNNINVDGINNFDQYEGNLLYNNIH
PF3D7_0810800.1-p1:transcript=PF3D7_0810800.1:gene=PF3D7_0810800:organism=Plasmodium_falciparum_3D7:gene_product=hydroxymethyldihydropterin_pyrophosphokinase-dihydropteroate_synthase:transcript_product=hydroxymethyldihydropterin_pyrophosphokinase-dihydropteroate_synthase:location=Pf3D7_08_v3:548200-550616(+):protein_length=706:sequence_SO=chromosome:SO=protein_coding_seq5	PF3D7_0810800.1-p1	(101, 162)	hydroxymethyldihydropterin_pyrophosphokinase-dihydropteroate_synthase	KELIDKCEEYETFLKNGKVDNSILKEVNVENYLLECNNIIVKNDEIMKNNLSKYKDKYYTSY
PFIT_0805400.1-p1:transcript=PFIT_0805400.1:gene=PFIT_0805400:organism=Plasmodium_falciparum_IT:gene_product=adenylyl_cyclase_beta:transcript_product=adenylyl_cyclase_beta:location=PfIT_08_v3:233972-241416(+):protein_length=2245:sequence_SO=chromosome:SO=protein_coding_seq52	PFIT_0805400.1-p1	(1276, 1337)	adenylyl_cyclase_beta	DDNHDDDDIHDDNHDDDDIHDDNHDGDDIHDDFHDDDDIHDDIHHDDNIHDDDHHDDDNYNT
PFIT_0718100.1-p1:transcript=PFIT_0718100.1:gene=PFIT_0718100:organism=Plasmodium_falciparum_IT:gene_product=conserved_Plasmodium_membrane_protein__unknown_function:transcript_product=conserved_Plasmodium_membrane_protein__unknown_function:location=PfIT_07_v3:851368-861483(+):protein_length=3371:sequence_SO=chromosome:SO=protein_coding_seq109	PFIT_0718100.1-p1	(2701, 2762)	PFIT_0718100.1-p1conserved_Plasmodium_membrane_protein__unknown_function	AFYIKNEDMHSMVTNNNNIQNEKMMSEKMVNEKMVNEENIIRINKGENLKVKKNSCLYIPIR
PF3D7_1106300.1-p1:transcript=PF3D7_1106300.1:gene=PF3D7_1106300:organism=Plasmodium_falciparum_3D7:gene_product=exonuclease__putative:transcript_product=exonuclease__putative:location=Pf3D7_11_v3:263604-266570(-):protein_length=733:sequence_SO=chromosome:SO=protein_coding_seq14	PF3D7_1106300.1-p1	(326, 387)	PF3D7_1106300.1-p1exonuclease__putative	EYENNEEINNEINNEINNEINNEINNEINNEINNEINDEINKEINNGINNGINNGINNEINN
PF3D7_0400100.1-p1:transcript=PF3D7_0400100.1:gene=PF3D7_0400100:organism=Plasmodium_falciparum_3D7:gene_product=erythrocyte_membrane_protein_1__PfEMP1:transcript_product=erythrocyte_membrane_protein_1__PfEMP1:location=Pf3D7_04_v3:28706-37677(+):protein_length=2646:sequence_SO=chromosome:SO=protein_coding_seq44	PF3D7_0400100.1-p1	(1076, 1137)	var	DFAKKPQFLRWMIEWGEEFCAERGKLEQNIGKSCNGINPIQYCSDNRHPCNKACDEYKNYVE
PF3D7_0400100.1-p1:transcript=PF3D7_0400100.1:gene=PF3D7_0400100:organism=Plasmodium_falciparum_3D7:gene_product=erythrocyte_membrane_protein_1__PfEMP1:transcript_product=erythrocyte_membrane_protein_1__PfEMP1:location=Pf3D7_04_v3:28706-37677(+):protein_length=2646:sequence_SO=chromosome:SO=protein_coding_seq43	PF3D7_0400100.1-p1	(1051, 1112)	var	KKTKIKNDYSYDKVNQSQNGNPSLEDFAKKPQFLRWMIEWGEEFCAERGKLEQNIGKSCNGI
MAL7P1.1_D7_seq8	MAL7P1.1_D7	(176, 237)	var	QNHLVQRKTSENPQKKLEGGEIPEDFKRQMFYTLGDYRDILVGDKTMIEALEKSGDTKIEDI
PF3D7_1405800.1-p1:transcript=PF3D7_1405800.1:gene=PF3D7_1405800:organism=Plasmodium_falciparum_3D7:gene_product=ribosome_biogenesis_protein_BOP1__putative:transcript_product=ribosome_biogenesis_protein_BOP1__putative:location=Pf3D7_14_v3:200493-204143(-):protein_length=966:sequence_SO=chromosome:SO=protein_coding_seq1	PF3D7_1405800.1-p1	(1, 62)	PF3D7_1405800.1-p1ribosome_biogenesis_protein_BOP1__putative	MNQNGEINTKNNEGKNKEQNKDGDKKKVKKLNYDKDELLENDVTKVAGEFDEEKEGNQEMKS
PF3D7_1405800.1-p1:transcript=PF3D7_1405800.1:gene=PF3D7_1405800:organism=Plasmodium_falciparum_3D7:gene_product=ribosome_biogenesis_protein_BOP1__putative:transcript_product=ribosome_biogenesis_protein_BOP1__putative:location=Pf3D7_14_v3:200493-204143(-):protein_length=966:sequence_SO=chromosome:SO=protein_coding_seq5	PF3D7_1405800.1-p1	(101, 162)	PF3D7_1405800.1-p1ribosome_biogenesis_protein_BOP1__putative	TNNSNNEKDENDFIETFKKKNKKNIKKDKKKTKDTDYEDTVVSSEIHDVITGAGDNSNIYIN
RAJ116var05_seq51	RAJ116var05	(1251, 1312)	var	EKNEIKGIYTLPGQDDTTTEKELQKDLQSGKIPEDFIRQMFYTFGDYRDLCIGNDIGNDLEN
RAJ116var36_seq6	RAJ116var36	(126, 187)	var	RRLHLCSHNLESINTTSMTTHKLLAEVCLAAKFEGESLKNYHAQYQTKYNDSQICTVLARSF
IGHvar15_seq13	IGHvar15	(301, 362)	var	VADVPTNFDYVPQYLRWFEEWGEDFCRKKNKKIKDVKRNCREQDKSGTERYCDRDGFDCERT
PFIT_1014000.1-p1:transcript=PFIT_1014000.1:gene=PFIT_1014000:organism=Plasmodium_falciparum_IT:gene_product=conserved_Plasmodium_protein__unknown_function:transcript_product=conserved_Plasmodium_protein__unknown_function:location=PfIT_10_v3:514036-517947(+):protein_length=1303:sequence_SO=chromosome:SO=protein_coding_seq13	PFIT_1014000.1-p1	(301, 362)	PFIT_1014000.1-p1conserved_Plasmodium_protein__unknown_function	NTNIHMDSLENYTNGNIYNKEILEDINFFEDSNDDDYSSIFEDEDNKLKNETSFNDIIPNNI
PF3D7_0903400.1-p1:transcript=PF3D7_0903400.1:gene=PF3D7_0903400:organism=Plasmodium_falciparum_3D7:gene_product=ATP-dependent_RNA_helicase_DDX60__putative:transcript_product=ATP-dependent_RNA_helicase_DDX60__putative:location=Pf3D7_09_v3:151700-159541(-):protein_length=2536:sequence_SO=chromosome:SO=protein_coding_seq34	PF3D7_0903400.1-p1	(826, 887)	PF3D7_0903400.1-p1ATP-dependent_RNA_helicase_DDX60__putative	EREDDEKDGDHEIVKISNISSDLKNKNKKNKRLSDSKHTNEKTIMKKKLCTNIKLKKNNDIF
PF3D7_0903400.1-p1:transcript=PF3D7_0903400.1:gene=PF3D7_0903400:organism=Plasmodium_falciparum_3D7:gene_product=ATP-dependent_RNA_helicase_DDX60__putative:transcript_product=ATP-dependent_RNA_helicase_DDX60__putative:location=Pf3D7_09_v3:151700-159541(-):protein_length=2536:sequence_SO=chromosome:SO=protein_coding_seq33	PF3D7_0903400.1-p1	(801, 862)	PF3D7_0903400.1-p1ATP-dependent_RNA_helicase_DDX60__putative	YDYLRNEEKKKGITQRMKVLFDSSSEREDDEKDGDHEIVKISNISSDLKNKNKKNKRLSDSK
IGHvar27_seq5	IGHvar27	(101, 162)	var	LFNLEGAVCTNSKIKGNEEKINGAGACAPYRRRHMCDLNLEHIDVHNVQNIHDLLGNVLVTA
PF13_0003_D9_seq9	PF13_0003_D9	(201, 262)	var	GEEISYNINMSTNSMDDPKYVSNNVYSGIDLINDSLSGGKPIDIYDEVLKRKENELFGTNYK
RAJ116var35_seq73	RAJ116var35	(1801, 1862)	var	YTKEMNNQLRTNLTTNSGYNDVTLTSGGPNGDTKLDDFSKRPQYFRWLEEWGEDFCRKRKDK
DD2var25_seq92	DD2var25	(2276, 2337)	var	IPEDSKYQYNKLKPDLEEFAKRPQFLRWFTEWAEDFCYHQAEEIKKLEEECNFNTCEQANVE
PFIT_1437900.1-p1:transcript=PFIT_1437900.1:gene=PFIT_1437900:organism=Plasmodium_falciparum_IT:gene_product=conserved_Plasmodium_protein__unknown_function:transcript_product=conserved_Plasmodium_protein__unknown_function:location=PfIT_14_v3:1521589-1524324(-):protein_length=865:sequence_SO=chromosome:SO=protein_coding_seq14	PFIT_1437900.1-p1	(326, 387)	PFIT_1437900.1-p1conserved_Plasmodium_protein__unknown_function	TFNNYLLDDLIQTITRHEDNFQNDELYEEEDKEHYNKVDKENDSSNIKQLNNNNNNNDHIEQ
PFIT_1123800.1-p1:transcript=PFIT_1123800.1:gene=PFIT_1123800:organism=Plasmodium_falciparum_IT:gene_product=dynein_heavy_chain__putative:transcript_product=dynein_heavy_chain__putative:location=PfIT_11_v3:811411-827721(+):protein_length=5253:sequence_SO=chromosome:SO=protein_coding_seq163	PFIT_1123800.1-p1	(4051, 4112)	PFIT_1123800.1-p1dynein_heavy_chain__putative	DDYLGSTKEEEKMEDEEKMEEEKVDEEKMEEEKVDEEKMEDEKVEEKMEEEKVDEENMEEEK
PFIT_1123800.1-p1:transcript=PFIT_1123800.1:gene=PFIT_1123800:organism=Plasmodium_falciparum_IT:gene_product=dynein_heavy_chain__putative:transcript_product=dynein_heavy_chain__putative:location=PfIT_11_v3:811411-827721(+):protein_length=5253:sequence_SO=chromosome:SO=protein_coding_seq162	PFIT_1123800.1-p1	(4026, 4087)	PFIT_1123800.1-p1dynein_heavy_chain__putative	SPNRSPSKVNQEQEYYLKSEDNDFNDDYLGSTKEEEKMEDEEKMEEEKVDEEKMEEEKVDEE
DD2var50_seq98	DD2var50	(2426, 2487)	var	GQGKDFNNVCKNIKKNDTPANGKGSCEFEQTYKTSLESLNETCKGNGKERFEIGQKWNSKYI
PF3D7_1004400.1-p1:transcript=PF3D7_1004400.1:gene=PF3D7_1004400:organism=Plasmodium_falciparum_3D7:gene_product=RNA-binding_protein__putative:transcript_product=RNA-binding_protein__putative:location=Pf3D7_10_v3:207000-209642(-):protein_length=880:sequence_SO=chromosome:SO=protein_coding_seq28	PF3D7_1004400.1-p1	(676, 737)	PF3D7_1004400.1-p1RNA-binding_protein__putative	KEKGGDENISLKNYKNKKENVDHDYENVIESNRGKRRSVKSKNKNENEKKGKTKDELYDDIS
PF3D7_1004400.1-p1:transcript=PF3D7_1004400.1:gene=PF3D7_1004400:organism=Plasmodium_falciparum_3D7:gene_product=RNA-binding_protein__putative:transcript_product=RNA-binding_protein__putative:location=Pf3D7_10_v3:207000-209642(-):protein_length=880:sequence_SO=chromosome:SO=protein_coding_seq24	PF3D7_1004400.1-p1	(576, 637)	PF3D7_1004400.1-p1RNA-binding_protein__putative	FRRDDNEDNKSEVDDSKYKKSTRSMSMIDRDNTYDERVSHRDGHMKDDRDDDMCYDRDDEEK
IT4var19_seq32	IT4var19	(776, 837)	var	QLEKRGGESNLKGDASKGKYTKKNGKAVALNDICSIDVQHSNSTYRSVKPCAGKNTGRFDIG
PFE0005w_D6_seq6	PFE0005w_D6	(126, 187)	var	SGNNTTASDTQNDIQNDGIPSNKFSDNEWNTLKDDFISQYLQSEQPNDLPNDYKSGNVTLNT
PFIT_1407200.1-p1:transcript=PFIT_1407200.1:gene=PFIT_1407200:organism=Plasmodium_falciparum_IT:gene_product=conserved_Plasmodium_protein__unknown_function:transcript_product=conserved_Plasmodium_protein__unknown_function:location=PfIT_14_v3:248829-257309(+):protein_length=2826:sequence_SO=chromosome:SO=protein_coding_seq72	PFIT_1407200.1-p1	(1776, 1837)	PFIT_1407200.1-p1conserved_Plasmodium_protein__unknown_function	LFHSTYSSDEYNSEVQNDRKNESKNKKKKSNHMYNEESEKYKKNINYDNYSDKSGKSYVSNK
PF3D7_0808700.1-p1:transcript=PF3D7_0808700.1:gene=PF3D7_0808700:organism=Plasmodium_falciparum_3D7:gene_product=erythrocyte_membrane_protein_1__PfEMP1:transcript_product=erythrocyte_membrane_protein_1__PfEMP1:location=Pf3D7_08_v3:440408-448062(+):protein_length=2231:sequence_SO=chromosome:SO=protein_coding_seq21	PF3D7_0808700.1-p1	(501, 562)	var	VPGKEWEKKNDNCTSGKLYEPKGDAEGTPIKILKSGENHDDIKQKIDDFCKTEDDESLYAAW
PF3D7_0930700.1-p1:transcript=PF3D7_0930700.1:gene=PF3D7_0930700:organism=Plasmodium_falciparum_3D7:gene_product=conserved_Plasmodium_protein__unknown_function:transcript_product=conserved_Plasmodium_protein__unknown_function:location=Pf3D7_09_v3:1221987-1223606(+):protein_length=463:sequence_SO=chromosome:SO=protein_coding_seq2	PF3D7_0930700.1-p1	(26, 87)	PF3D7_0930700.1-p1conserved_Plasmodium_protein__unknown_function	IFNEIQNEINNTCTSDHIVEEKEGKHINSYNNENEYNNENEYNNKNEYNNKNEYNNKNNVKK
PF3D7_0712000.1-p1:transcript=PF3D7_0712000.1:gene=PF3D7_0712000:organism=Plasmodium_falciparum_3D7:gene_product=erythrocyte_membrane_protein_1__PfEMP1:transcript_product=erythrocyte_membrane_protein_1__PfEMP1:location=Pf3D7_07_v3:527338-535131(-):protein_length=2275:sequence_SO=chromosome:SO=protein_coding_seq74	PF3D7_0712000.1-p1	(1826, 1887)	var	KKKTKSSVGNLFQILQIPKGDYDIPTLKSSNRYIPYASDRYKGKTYIYMEGDSSGDEKYAFM
PF3D7_1208500.1-p1:transcript=PF3D7_1208500.1:gene=PF3D7_1208500:organism=Plasmodium_falciparum_3D7:gene_product=conserved_Plasmodium_protein__unknown_function:transcript_product=conserved_Plasmodium_protein__unknown_function:location=Pf3D7_12_v3:395986-401247(-):protein_length=1753:sequence_SO=chromosome:SO=protein_coding_seq49	PF3D7_1208500.1-p1	(1201, 1262)	PF3D7_1208500.1-p1conserved_Plasmodium_protein__unknown_function	NLHTYTKDEYFSNDIDYEHIKIEENYKNYNNINISSKNNLNHKIINHDDKKDHFVNNKMKDA
PFIT_0207000.1-p1:transcript=PFIT_0207000.1:gene=PFIT_0207000:organism=Plasmodium_falciparum_IT:gene_product=serine_repeat_antigen_4:transcript_product=serine_repeat_antigen_4:location=PfIT_02_v3:255047-258361(-):protein_length=970:sequence_SO=chromosome:SO=protein_coding_seq3	PFIT_0207000.1-p1	(51, 112)	serine_repeat_antigen_4	AGQDASQGAGQDASQGAGQDANPDPTLPKPPSPPADDTKDTGSQGDADSSSSKIEIPPLVKP
PFIT_0207000.1-p1:transcript=PFIT_0207000.1:gene=PFIT_0207000:organism=Plasmodium_falciparum_IT:gene_product=serine_repeat_antigen_4:transcript_product=serine_repeat_antigen_4:location=PfIT_02_v3:255047-258361(-):protein_length=970:sequence_SO=chromosome:SO=protein_coding_seq2	PFIT_0207000.1-p1	(26, 87)	serine_repeat_antigen_4	STTQGGDTDTHQGTPPGEGSDVSQGAGQDASQGAGQDASQGAGQDANPDPTLPKPPSPPADD
PFIT_1334600.1-p1:transcript=PFIT_1334600.1:gene=PFIT_1334600:organism=Plasmodium_falciparum_IT:gene_product=reticulocyte_binding_protein_2_homologue_a:transcript_product=reticulocyte_binding_protein_2_homologue_a:location=PfIT_13_v3:1394908-1404376(+):protein_length=3080:sequence_SO=chromosome:SO=protein_coding_seq84	PFIT_1334600.1-p1	(2076, 2137)	reticulocyte_binding_protein_2_homologue_a	NFEKYKEIFDNVEEYKTLDDTKNAYIVKKAEILKNVDINKTKEDLDIYFNDLDELEKSLTLS
PFIT_1037600.1-p1:transcript=PFIT_1037600.1:gene=PFIT_1037600:organism=Plasmodium_falciparum_IT:gene_product=gametocyte-specific_protein:transcript_product=gametocyte-specific_protein:location=PfIT_10_v3:1449546-1470959(+):protein_length=7099:sequence_SO=chromosome:SO=protein_coding_seq139	PFIT_1037600.1-p1	(3451, 3512)	gametocyte-specific_protein	LVEELIPEEVVQEVITEEVLEEVIPEEIVEELIPEKLIGEVVPEKVVEEVVLEEVVEEVIPE
PF3D7_0420900.1-p1:transcript=PF3D7_0420900.1:gene=PF3D7_0420900:organism=Plasmodium_falciparum_3D7:gene_product=erythrocyte_membrane_protein_1__PfEMP1:transcript_product=erythrocyte_membrane_protein_1__PfEMP1:location=Pf3D7_04_v3:946169-953773(-):protein_length=2201:sequence_SO=chromosome:SO=protein_coding_seq41	PF3D7_0420900.1-p1	(1001, 1062)	var	VGEELQNDLEGNGTIPEEFKRQMFYTLGDYKDIFEGKSIEVGDEKDKQKMKEIEKKIQAHIN
PF3D7_0916200.1-p1:transcript=PF3D7_0916200.1:gene=PF3D7_0916200:organism=Plasmodium_falciparum_3D7:gene_product=conserved_Plasmodium_protein__unknown_function:transcript_product=conserved_Plasmodium_protein__unknown_function:location=Pf3D7_09_v3:675922-679632(+):protein_length=1144:sequence_SO=chromosome:SO=protein_coding_seq14	PF3D7_0916200.1-p1	(326, 387)	PF3D7_0916200.1-p1conserved_Plasmodium_protein__unknown_function	EQNISINDTDQRNIEKLKDKKFTNDKHHEDETNDSNGEQIDDMHKQKNTNKNKKLFLLKDIL
PF3D7_0412700.1-p1:transcript=PF3D7_0412700.1:gene=PF3D7_0412700:organism=Plasmodium_falciparum_3D7:gene_product=erythrocyte_membrane_protein_1__PfEMP1:transcript_product=erythrocyte_membrane_protein_1__PfEMP1:location=Pf3D7_04_v3:561667-569342(-):protein_length=2277:sequence_SO=chromosome:SO=protein_coding_seq43	PF3D7_0412700.1-p1	(1051, 1112)	var	AGVLQTIGGTLENSGEQNPQKKLQESGEIPDDFLRQMFYTLGDYRDILVRGVADDKNGGNNI
PF3D7_0412700.1-p1:transcript=PF3D7_0412700.1:gene=PF3D7_0412700:organism=Plasmodium_falciparum_3D7:gene_product=erythrocyte_membrane_protein_1__PfEMP1:transcript_product=erythrocyte_membrane_protein_1__PfEMP1:location=Pf3D7_04_v3:561667-569342(-):protein_length=2277:sequence_SO=chromosome:SO=protein_coding_seq44	PF3D7_0412700.1-p1	(1076, 1137)	var	SGEIPDDFLRQMFYTLGDYRDILVRGVADDKNGGNNIILNASGNKEDMEKMKKIQQEIDKIL
DD2var16_seq77	DD2var16	(1901, 1962)	var	NVYSGIDLINDSLSGDYDIYDEVLKRKENELFGTNHVKHTSIHSVAKLTNSDPIHNQLELFH
DD2var16_seq73	DD2var16	(1801, 1862)	var	QNDGIPSSKITDNEWNTLKDEFISNMLQNEPNTEPNILRDNVDNNTHPTTSRHNIDQKPFIT
DD2var16_seq72	DD2var16	(1776, 1837)	var	PSGKLSGNTIPTSDKNTPSDTQNDIQNDGIPSSKITDNEWNTLKDEFISNMLQNEPNTEPNI
PFIT_1443800.1-p1:transcript=PFIT_1443800.1:gene=PFIT_1443800:organism=Plasmodium_falciparum_IT:gene_product=TRAP-like_protein:transcript_product=TRAP-like_protein:location=PfIT_14_v3:1755644-1766159(+):protein_length=3442:sequence_SO=chromosome:SO=protein_coding_seq114	PFIT_1443800.1-p1	(2826, 2887)	TRAP-like_protein	KEGNDKKFEEGNDKEIKEGNDKEIKEGDYKKFEEEIEKQIEEGNDKEIEEEIEKKIEEANEK
PFIT_1443800.1-p1:transcript=PFIT_1443800.1:gene=PFIT_1443800:organism=Plasmodium_falciparum_IT:gene_product=TRAP-like_protein:transcript_product=TRAP-like_protein:location=PfIT_14_v3:1755644-1766159(+):protein_length=3442:sequence_SO=chromosome:SO=protein_coding_seq115	PFIT_1443800.1-p1	(2851, 2912)	TRAP-like_protein	EGDYKKFEEEIEKQIEEGNDKEIEEEIEKKIEEANEKKIKEENDKKFEEGNDKEVKEENDKE
PFIT_1443800.1-p1:transcript=PFIT_1443800.1:gene=PFIT_1443800:organism=Plasmodium_falciparum_IT:gene_product=TRAP-like_protein:transcript_product=TRAP-like_protein:location=PfIT_14_v3:1755644-1766159(+):protein_length=3442:sequence_SO=chromosome:SO=protein_coding_seq110	PFIT_1443800.1-p1	(2726, 2787)	TRAP-like_protein	NKEIRERNDKEINEGNDKNFEKEIEKQSEEANEKEIKEGNDKIFEEGNYKEINEGKNKEFEE
PFIT_1443800.1-p1:transcript=PFIT_1443800.1:gene=PFIT_1443800:organism=Plasmodium_falciparum_IT:gene_product=TRAP-like_protein:transcript_product=TRAP-like_protein:location=PfIT_14_v3:1755644-1766159(+):protein_length=3442:sequence_SO=chromosome:SO=protein_coding_seq111	PFIT_1443800.1-p1	(2751, 2812)	TRAP-like_protein	KQSEEANEKEIKEGNDKIFEEGNYKEINEGKNKEFEEGNNKDVKEENEKEINEGNEEEINEG
PFIT_1443800.1-p1:transcript=PFIT_1443800.1:gene=PFIT_1443800:organism=Plasmodium_falciparum_IT:gene_product=TRAP-like_protein:transcript_product=TRAP-like_protein:location=PfIT_14_v3:1755644-1766159(+):protein_length=3442:sequence_SO=chromosome:SO=protein_coding_seq112	PFIT_1443800.1-p1	(2776, 2837)	TRAP-like_protein	EINEGKNKEFEEGNNKDVKEENEKEINEGNEEEINEGNEKEIKEGNEKEIKEGNDKKFEEGN
PFIT_1443800.1-p1:transcript=PFIT_1443800.1:gene=PFIT_1443800:organism=Plasmodium_falciparum_IT:gene_product=TRAP-like_protein:transcript_product=TRAP-like_protein:location=PfIT_14_v3:1755644-1766159(+):protein_length=3442:sequence_SO=chromosome:SO=protein_coding_seq113	PFIT_1443800.1-p1	(2801, 2862)	TRAP-like_protein	INEGNEEEINEGNEKEIKEGNEKEIKEGNDKKFEEGNDKEIKEGNDKEIKEGDYKKFEEEIE
PFIT_1443800.1-p1:transcript=PFIT_1443800.1:gene=PFIT_1443800:organism=Plasmodium_falciparum_IT:gene_product=TRAP-like_protein:transcript_product=TRAP-like_protein:location=PfIT_14_v3:1755644-1766159(+):protein_length=3442:sequence_SO=chromosome:SO=protein_coding_seq118	PFIT_1443800.1-p1	(2926, 2987)	TRAP-like_protein	DKKFEEGNDKEIKEGNEKEIKEGNEKEIKEGNEKEIKEGNDKNFEEDDYKKFEEDDYKKFEE
PFIT_1443800.1-p1:transcript=PFIT_1443800.1:gene=PFIT_1443800:organism=Plasmodium_falciparum_IT:gene_product=TRAP-like_protein:transcript_product=TRAP-like_protein:location=PfIT_14_v3:1755644-1766159(+):protein_length=3442:sequence_SO=chromosome:SO=protein_coding_seq119	PFIT_1443800.1-p1	(2951, 3012)	TRAP-like_protein	KEIKEGNEKEIKEGNDKNFEEDDYKKFEEDDYKKFEERMNKEFEEGNKKVVEEGNKKVVEGG
PF3D7_0917500.1-p1:transcript=PF3D7_0917500.1:gene=PF3D7_0917500:organism=Plasmodium_falciparum_3D7:gene_product=conserved_Plasmodium_protein__unknown_function:transcript_product=conserved_Plasmodium_protein__unknown_function:location=Pf3D7_09_v3:726703-728748(+):protein_length=681:sequence_SO=chromosome:SO=protein_coding_seq10	PF3D7_0917500.1-p1	(226, 287)	PF3D7_0917500.1-p1conserved_Plasmodium_protein__unknown_function	IGKSIFDKKDILYDMNDHKKKAHEYIDDMYTKLNNIEPIIISIIYKQNFWYNNILNKSEYDS
PFIT_0505700.1-p1:transcript=PFIT_0505700.1:gene=PFIT_0505700:organism=Plasmodium_falciparum_IT:gene_product=conserved_Plasmodium_membrane_protein__unknown_function:transcript_product=conserved_Plasmodium_membrane_protein__unknown_function:location=PfIT_05_v3:256355-259075(-):protein_length=906:sequence_SO=chromosome:SO=protein_coding_seq11	PFIT_0505700.1-p1	(251, 312)	PFIT_0505700.1-p1conserved_Plasmodium_membrane_protein__unknown_function	DNKEDKKDTEQVDDNKEDKKYIEQIDKNKEDKKDTEQVDDNKEDKKDPHQTDDKNDGASCEE
PFIT_0505700.1-p1:transcript=PFIT_0505700.1:gene=PFIT_0505700:organism=Plasmodium_falciparum_IT:gene_product=conserved_Plasmodium_membrane_protein__unknown_function:transcript_product=conserved_Plasmodium_membrane_protein__unknown_function:location=PfIT_05_v3:256355-259075(-):protein_length=906:sequence_SO=chromosome:SO=protein_coding_seq10	PFIT_0505700.1-p1	(226, 287)	PFIT_0505700.1-p1conserved_Plasmodium_membrane_protein__unknown_function	NKEDKKDIEQVDDNKEDKKDTEQVDDNKEDKKDTEQVDDNKEDKKYIEQIDKNKEDKKDTEQ
PFIT_0505700.1-p1:transcript=PFIT_0505700.1:gene=PFIT_0505700:organism=Plasmodium_falciparum_IT:gene_product=conserved_Plasmodium_membrane_protein__unknown_function:transcript_product=conserved_Plasmodium_membrane_protein__unknown_function:location=PfIT_05_v3:256355-259075(-):protein_length=906:sequence_SO=chromosome:SO=protein_coding_seq12	PFIT_0505700.1-p1	(276, 337)	PFIT_0505700.1-p1conserved_Plasmodium_membrane_protein__unknown_function	DKNKEDKKDTEQVDDNKEDKKDPHQTDDKNDGASCEEEKKVIMSEIKTIKEDLDNCNITNKK
PFIT_1108700.1-p1:transcript=PFIT_1108700.1:gene=PFIT_1108700:organism=Plasmodium_falciparum_IT:gene_product=mechanosensitive_ion_channel_protein:transcript_product=mechanosensitive_ion_channel_protein:location=PfIT_11_v3:275830-281295(-):protein_length=1821:sequence_SO=chromosome:SO=protein_coding_seq28	PFIT_1108700.1-p1	(676, 737)	mechanosensitive_ion_channel_protein	DTTMNIIKQDQINEKQNYDIITKTKENLMNNSDKGNIDILPNEKYNVDKHIHNINVDKDIKD
PFIT_1108700.1-p1:transcript=PFIT_1108700.1:gene=PFIT_1108700:organism=Plasmodium_falciparum_IT:gene_product=mechanosensitive_ion_channel_protein:transcript_product=mechanosensitive_ion_channel_protein:location=PfIT_11_v3:275830-281295(-):protein_length=1821:sequence_SO=chromosome:SO=protein_coding_seq27	PFIT_1108700.1-p1	(651, 712)	mechanosensitive_ion_channel_protein	IHIEKENYNVNNVKIINNDITNEISDTTMNIIKQDQINEKQNYDIITKTKENLMNNSDKGNI
PF3D7_1443400.1-p1:transcript=PF3D7_1443400.1:gene=PF3D7_1443400:organism=Plasmodium_falciparum_3D7:gene_product=WD_repeat-containing_protein:transcript_product=WD_repeat-containing_protein:location=Pf3D7_14_v3:1776958-1779606(-):protein_length=819:sequence_SO=chromosome:SO=protein_coding_seq2	PF3D7_1443400.1-p1	(26, 87)	WD_repeat-containing_protein	FGGSKKYIKNDYKNEDADINNISYASEFLNNNVDIYYDNKYGINKVCFSPQGKYVAGCTSNG
PFIT_1449700.1-p1:transcript=PFIT_1449700.1:gene=PFIT_1449700:organism=Plasmodium_falciparum_IT:gene_product=conserved_Plasmodium_protein__unknown_function:transcript_product=conserved_Plasmodium_protein__unknown_function:location=PfIT_14_v3:2008562-2019837(-):protein_length=3668:sequence_SO=chromosome:SO=protein_coding_seq16	PFIT_1449700.1-p1	(376, 437)	PFIT_1449700.1-p1conserved_Plasmodium_protein__unknown_function	NNNNNSKKDIYYYKDNKETYNYQEMSNNIVENQYTIGNMNNINNNTYKPINTHMLYDNKNDM
PF3D7_0307900.1-p1:transcript=PF3D7_0307900.1:gene=PF3D7_0307900:organism=Plasmodium_falciparum_3D7:gene_product=conserved_Plasmodium_protein__unknown_function:transcript_product=conserved_Plasmodium_protein__unknown_function:location=Pf3D7_03_v3:340028-351652(-):protein_length=3724:sequence_SO=chromosome:SO=protein_coding_seq26	PF3D7_0307900.1-p1	(626, 687)	PF3D7_0307900.1-p1conserved_Plasmodium_protein__unknown_function	LKENLKEDANEYNNDKENKNNKTKEILKSKNYLENEKRTLEELKLRGKNNIFKKDEKYNSLG
PF3D7_0307900.1-p1:transcript=PF3D7_0307900.1:gene=PF3D7_0307900:organism=Plasmodium_falciparum_3D7:gene_product=conserved_Plasmodium_protein__unknown_function:transcript_product=conserved_Plasmodium_protein__unknown_function:location=Pf3D7_03_v3:340028-351652(-):protein_length=3724:sequence_SO=chromosome:SO=protein_coding_seq20	PF3D7_0307900.1-p1	(476, 537)	PF3D7_0307900.1-p1conserved_Plasmodium_protein__unknown_function	NLILGVNEGEEFNEEVFENIEKELQERKDEKNKNDKTIYNNNEEQTDDLNRNINKIESINNN
PF3D7_0307900.1-p1:transcript=PF3D7_0307900.1:gene=PF3D7_0307900:organism=Plasmodium_falciparum_3D7:gene_product=conserved_Plasmodium_protein__unknown_function:transcript_product=conserved_Plasmodium_protein__unknown_function:location=Pf3D7_03_v3:340028-351652(-):protein_length=3724:sequence_SO=chromosome:SO=protein_coding_seq22	PF3D7_0307900.1-p1	(526, 587)	PF3D7_0307900.1-p1conserved_Plasmodium_protein__unknown_function	RNINKIESINNNNDNNNNINNKKEFNKIRTEHILNKESISKHIKGSPSRDKEIKKLYTTNKN
PF3D7_0307900.1-p1:transcript=PF3D7_0307900.1:gene=PF3D7_0307900:organism=Plasmodium_falciparum_3D7:gene_product=conserved_Plasmodium_protein__unknown_function:transcript_product=conserved_Plasmodium_protein__unknown_function:location=Pf3D7_03_v3:340028-351652(-):protein_length=3724:sequence_SO=chromosome:SO=protein_coding_seq28	PF3D7_0307900.1-p1	(676, 737)	PF3D7_0307900.1-p1conserved_Plasmodium_protein__unknown_function	IFKKDEKYNSLGEVIINEIQINEENKINDIQDGNISKQKIIQSSSRTNDTFNIKDISLNDDL
DD2var32_seq5	DD2var32	(101, 162)	var	PNLEGAVCTNSKIKGNENKIIDIGACAPYRRRNICDYNLEHLNERNVLNTHDLLGNVLVMAK
DD2var32_seq4	DD2var32	(76, 137)	var	WFHTNVWKRTPRERDPCYRRQPKNNPNLEGAVCTNSKIKGNENKIIDIGACAPYRRRNICDY
PF3D7_1138400.1-p1:transcript=PF3D7_1138400.1:gene=PF3D7_1138400:organism=Plasmodium_falciparum_3D7:gene_product=guanylyl_cyclase:transcript_product=guanylyl_cyclase:location=Pf3D7_11_v3:1501011-1513691(-):protein_length=4226:sequence_SO=chromosome:SO=protein_coding_seq135	PF3D7_1138400.1-p1	(3351, 3412)	guanylyl_cyclase	DKTQNILGYYSNKINQNNDSNINEGIINNNMNTFNTIDGDTSNYYVNLKDLSLNDLPNEYIK
PF3D7_1230000.1-p1:transcript=PF3D7_1230000.1:gene=PF3D7_1230000:organism=Plasmodium_falciparum_3D7:gene_product=conserved_Plasmodium_protein__unknown_function:transcript_product=conserved_Plasmodium_protein__unknown_function:location=Pf3D7_12_v3:1233696-1241287(+):protein_length=2001:sequence_SO=chromosome:SO=protein_coding_seq63	PF3D7_1230000.1-p1	(1551, 1612)	PF3D7_1230000.1-p1conserved_Plasmodium_protein__unknown_function	NPCDVSYQHNPYSNNSNHIYDDNYIYEKIKNNELKNDNPFNEILNNSILNNTWIKNKPELGL
PF3D7_0420700.1-p1:transcript=PF3D7_0420700.1:gene=PF3D7_0420700:organism=Plasmodium_falciparum_3D7:gene_product=erythrocyte_membrane_protein_1__PfEMP1:transcript_product=erythrocyte_membrane_protein_1__PfEMP1:location=Pf3D7_04_v3:935031-941875(-):protein_length=2152:sequence_SO=chromosome:SO=protein_coding_seq78	PF3D7_0420700.1-p1	(1926, 1987)	var	TDDSKYVSNNIYSGIDLINDSLNSDQHVDIYDELLKRKENEIFGTNHTKHTTTNSIAKQTHT
PF3D7_0420700.1-p1:transcript=PF3D7_0420700.1:gene=PF3D7_0420700:organism=Plasmodium_falciparum_3D7:gene_product=erythrocyte_membrane_protein_1__PfEMP1:transcript_product=erythrocyte_membrane_protein_1__PfEMP1:location=Pf3D7_04_v3:935031-941875(-):protein_length=2152:sequence_SO=chromosome:SO=protein_coding_seq77	PF3D7_0420700.1-p1	(1901, 1962)	var	LHNGEEVTYNINFDVSKNINEITNTTDDSKYVSNNIYSGIDLINDSLNSDQHVDIYDELLKR
PFIT_1127700.1-p1:transcript=PFIT_1127700.1:gene=PFIT_1127700:organism=Plasmodium_falciparum_IT:gene_product=RNA-binding_protein__putative:transcript_product=RNA-binding_protein__putative:location=PfIT_11_v3:988650-991397(+):protein_length=915:sequence_SO=chromosome:SO=protein_coding_seq14	PFIT_1127700.1-p1	(326, 387)	PFIT_1127700.1-p1RNA-binding_protein__putative	NNNNNKKDNSNSKKSNNSNNSNKSNKSNKSNSNSYSNNDESNRKSLSCDMCSVQNESIRKKE
PF3D7_1474300.1-p1:transcript=PF3D7_1474300.1:gene=PF3D7_1474300:organism=Plasmodium_falciparum_3D7:gene_product=DNA_repair_metallo-beta-lactamase_protein__putative:transcript_product=DNA_repair_metallo-beta-lactamase_protein__putative:location=Pf3D7_14_v3:3040768-3043560(+):protein_length=860:sequence_SO=chromosome:SO=protein_coding_seq2	PF3D7_1474300.1-p1	(26, 87)	PF3D7_1474300.1-p1DNA_repair_metallo-beta-lactamase_protein__putative	RDALRISEDKEKRKICRIFFLTHFHADHYTNINKYFNENVFCSQITKKLLVNIIEVQDKYVH
PFIT_0628600.1-p1:transcript=PFIT_0628600.1:gene=PFIT_0628600:organism=Plasmodium_falciparum_IT:gene_product=SET_domain_protein__putative:transcript_product=SET_domain_protein__putative:location=PfIT_06_v3:1155449-1176384(+):protein_length=6737:sequence_SO=chromosome:SO=protein_coding_seq247	PFIT_0628600.1-p1	(6151, 6212)	PFIT_0628600.1-p1SET_domain_protein__putative	INKLEGNFFNYEEKGNLLGSNVSKIKMNELLECNVGEENFCDDDQKFSDNKNYASDDEEKKK
PF3D7_1038400.1-p1:transcript=PF3D7_1038400.1:gene=PF3D7_1038400:organism=Plasmodium_falciparum_3D7:gene_product=gametocyte-specific_protein:transcript_product=gametocyte-specific_protein:location=Pf3D7_10_v3:1519021-1547825(+):protein_length=9563:sequence_SO=chromosome:SO=protein_coding_seq15	PF3D7_1038400.1-p1	(351, 412)	gametocyte-specific_protein	KDEKDEKDEKDEKDEKDEKDEKDEKDEKDEKGEKDESKGEEKFLKEEKMPKKEENMQDKIER
PF3D7_0700200.1-p1:transcript=PF3D7_0700200.1:gene=PF3D7_0700200:organism=Plasmodium_falciparum_3D7:gene_product=rifin:transcript_product=rifin:location=Pf3D7_07_v3:30097-31269(+):protein_length=323:sequence_SO=chromosome:SO=protein_coding_seq6	PF3D7_0700200.1-p1	(126, 187)	rifin	AIPTCICEKSLADKVEKGCLRCAQNLGGLVPGMGLIGGTAVYAAAVKAATKAGMKEALEGLK
PF3D7_0700200.1-p1:transcript=PF3D7_0700200.1:gene=PF3D7_0700200:organism=Plasmodium_falciparum_3D7:gene_product=rifin:transcript_product=rifin:location=Pf3D7_07_v3:30097-31269(+):protein_length=323:sequence_SO=chromosome:SO=protein_coding_seq3	PF3D7_0700200.1-p1	(51, 112)	rifin	APVNYYSDPQMKEVMDNFNKQTQQRFHEYDERMKTTRQKCKDRCDKDIQKIILKDKIEKELA
PF3D7_0511500.1-p1:transcript=PF3D7_0511500.1:gene=PF3D7_0511500:organism=Plasmodium_falciparum_3D7:gene_product=RNA_pseudouridylate_synthase__putative:transcript_product=RNA_pseudouridylate_synthase__putative:location=Pf3D7_05_v3:486602-516787(+):protein_length=10061:sequence_SO=chromosome:SO=protein_coding_seq201	PF3D7_0511500.1-p1	(5001, 5062)	PF3D7_0511500.1-p1RNA_pseudouridylate_synthase__putative	GPYNMNNVKNKNNNNNNSNNKRKKNEKNEKIDKIEQFLHESELEKDIMNITFNEKEFLGKDL
DD2var24_seq133	DD2var24	(3301, 3362)	var	QIHMDDPKPINEFTYVDSNPNQVDDTYVDSNPDNSSMDTILEDLDKPFNEPYYYDMYDDDIY
DD2var24_seq134	DD2var24	(3326, 3387)	var	TYVDSNPDNSSMDTILEDLDKPFNEPYYYDMYDDDIYYDVNDDNDISTVDTNAMDVPSKVQI
DD2var24_seq135	DD2var24	(3351, 3412)	var	PFNEPYYYDMYDDDIYYDVNDDNDISTVDTNAMDVPSKVQIEMDVNTKLVKEKYPIADVWDI
PF3D7_0804700.1-p1:transcript=PF3D7_0804700.1:gene=PF3D7_0804700:organism=Plasmodium_falciparum_3D7:gene_product=conserved_Plasmodium_protein__unknown_function:transcript_product=conserved_Plasmodium_protein__unknown_function:location=Pf3D7_08_v3:271417-277413(-):protein_length=1998:sequence_SO=chromosome:SO=protein_coding_seq43	PF3D7_0804700.1-p1	(1051, 1112)	PF3D7_0804700.1-p1conserved_Plasmodium_protein__unknown_function	KNVEKDTKNVEKDTKNVEKDTNNVEKGTNNVEKDTKNVDKYTNNEKKMITFINKMEYNNCKI
MAL7P1.50_D2_seq15	MAL7P1.50_D2	(351, 412)	var	GASGGSRQRRNVRSNYDNGYEKKFYKELKNRYGSVETFLVLLNNEKACTAVDDDKGGKIDFK
PFIT_0818400.1-p1:transcript=PFIT_0818400.1:gene=PFIT_0818400:organism=Plasmodium_falciparum_IT:gene_product=conserved_Plasmodium_protein__unknown_function:transcript_product=conserved_Plasmodium_protein__unknown_function:location=PfIT_08_v3:768581-770650(+):protein_length=493:sequence_SO=chromosome:SO=protein_coding_seq15	PFIT_0818400.1-p1	(351, 412)	PFIT_0818400.1-p1conserved_Plasmodium_protein__unknown_function	ITSNGSNALDEKNNYTEENNNNEKKYFKNTNSIGDNDNNKTYQGSNIVNFNYTNNNMVPEKK
PF3D7_0314900.1-p1:transcript=PF3D7_0314900.1:gene=PF3D7_0314900:organism=Plasmodium_falciparum_3D7:gene_product=conserved_Plasmodium_membrane_protein__unknown_function:transcript_product=conserved_Plasmodium_membrane_protein__unknown_function:location=Pf3D7_03_v3:608883-610718(+):protein_length=611:sequence_SO=chromosome:SO=protein_coding_seq12	PF3D7_0314900.1-p1	(276, 337)	PF3D7_0314900.1-p1conserved_Plasmodium_membrane_protein__unknown_function	KNDDDNKNDDDNTSDDNNIIYDEYNNNISDDKNNLSKFVYEKRFNLNLLKDGSDENKYSIVS
PF3D7_1321100.1-p1:transcript=PF3D7_1321100.1:gene=PF3D7_1321100:organism=Plasmodium_falciparum_3D7:gene_product=conserved_Plasmodium_protein__unknown_function:transcript_product=conserved_Plasmodium_protein__unknown_function:location=Pf3D7_13_v3:861442-872332(-):protein_length=3447:sequence_SO=chromosome:SO=protein_coding_seq42	PF3D7_1321100.1-p1	(1026, 1087)	PF3D7_1321100.1-p1conserved_Plasmodium_protein__unknown_function	KDKEETISSDDTLEKGKLDNSNMGDSDEKLKDDMKNNEHENLSAENVPSDENTINDKTKEGS
PF3D7_0115700.1-p1:transcript=PF3D7_0115700.1:gene=PF3D7_0115700:organism=Plasmodium_falciparum_3D7:gene_product=erythrocyte_membrane_protein_1__PfEMP1:transcript_product=erythrocyte_membrane_protein_1__PfEMP1:location=Pf3D7_01_v3:607390-614893(-):protein_length=2203:sequence_SO=chromosome:SO=protein_coding_seq29	PF3D7_0115700.1-p1	(701, 762)	var	GVLEWNLKEEFLKDESTEDKENKVSAEEAKEIKHLKKMLQQAGVDVGDLAAFVGPCTKGPVA
PFIT_0800960.1-p1:transcript=PFIT_0800960.1:gene=PFIT_0800960:organism=Plasmodium_falciparum_IT:gene_product=rifin:transcript_product=rifin:location=PfIT_08_v3:40660-41421(-):protein_length=254:sequence_SO=chromosome:SO=protein_coding_seq1	PFIT_0800960.1-p1	(1, 62)	rifin	IYNQRNHNSTTPHHPPNTRLLCECELYSPANYDNDQEMKEVMQQFEVRTSQRFEEYDERMKT
PFIT_0800960.1-p1:transcript=PFIT_0800960.1:gene=PFIT_0800960:organism=Plasmodium_falciparum_IT:gene_product=rifin:transcript_product=rifin:location=PfIT_08_v3:40660-41421(-):protein_length=254:sequence_SO=chromosome:SO=protein_coding_seq2	PFIT_0800960.1-p1	(26, 87)	rifin	LYSPANYDNDQEMKEVMQQFEVRTSQRFEEYDERMKTTRQKCKDKCDKEIQKIVLKDKIDKE
AAQ73928_seq11	AAQ73928	(251, 312)	var	NREDVWKALTCSAPYNAHYFIKSSDKEHSFSNEHCGHYKNGDPLTNLDYVPQFLRWFDEWAD
AAQ73928_seq17	AAQ73928	(401, 462)	var	GIPKSSINNEYYGEFYKILKNNNYETANEFINLLNEGRYCKKQKPEEENIDFTKTGEKDTFY
AAQ73928_seq16	AAQ73928	(376, 437)	var	GNQREAFRKQKEKYAKEIEAYVTNRGIPKSSINNEYYGEFYKILKNNNYETANEFINLLNEG
PF3D7_0301600.1-p1:transcript=PF3D7_0301600.1:gene=PF3D7_0301600:organism=Plasmodium_falciparum_3D7:gene_product=Plasmodium_exported_protein_(hyp1)__unknown_function:transcript_product=Plasmodium_exported_protein_(hyp1)__unknown_function:location=Pf3D7_03_v3:91115-93463(-):protein_length=732:sequence_SO=chromosome:SO=protein_coding_seq15	PF3D7_0301600.1-p1	(351, 412)	PF3D7_0301600.1-p1Plasmodium_exported_protein_(hyp1)__unknown_function	WDNQNTHDGFPSGWNNYNSENSDHKDQIKVETPYIRVVEEVNDESNNKRDNYDTLNKDSSCN
PF3D7_0301600.1-p1:transcript=PF3D7_0301600.1:gene=PF3D7_0301600:organism=Plasmodium_falciparum_3D7:gene_product=Plasmodium_exported_protein_(hyp1)__unknown_function:transcript_product=Plasmodium_exported_protein_(hyp1)__unknown_function:location=Pf3D7_03_v3:91115-93463(-):protein_length=732:sequence_SO=chromosome:SO=protein_coding_seq11	PF3D7_0301600.1-p1	(251, 312)	PF3D7_0301600.1-p1Plasmodium_exported_protein_(hyp1)__unknown_function	SEYDTYKSEYDTYKSQYDTYKSQYDDRNKYSYPSREGNYVPPFMDENDNRLNNNYRSGFDDT
PF3D7_0301600.1-p1:transcript=PF3D7_0301600.1:gene=PF3D7_0301600:organism=Plasmodium_falciparum_3D7:gene_product=Plasmodium_exported_protein_(hyp1)__unknown_function:transcript_product=Plasmodium_exported_protein_(hyp1)__unknown_function:location=Pf3D7_03_v3:91115-93463(-):protein_length=732:sequence_SO=chromosome:SO=protein_coding_seq10	PF3D7_0301600.1-p1	(226, 287)	PF3D7_0301600.1-p1Plasmodium_exported_protein_(hyp1)__unknown_function	NFLNEDYSNEFESNNFNSPHYDTYKSEYDTYKSEYDTYKSQYDTYKSQYDDRNKYSYPSREG
PF3D7_1327000.1-p1:transcript=PF3D7_1327000.1:gene=PF3D7_1327000:organism=Plasmodium_falciparum_3D7:gene_product=conserved_Plasmodium_protein__unknown_function:transcript_product=conserved_Plasmodium_protein__unknown_function:location=Pf3D7_13_v3:1134070-1138040(-):protein_length=1214:sequence_SO=chromosome:SO=protein_coding_seq12	PF3D7_1327000.1-p1	(276, 337)	PF3D7_1327000.1-p1conserved_Plasmodium_protein__unknown_function	EKENVINNEKDVEENNFFVNKKKVNHDTKNKYPLKDINNTNTKRYFDNEENSSNNICDDNTS
PFL1960w_D2_seq14	PFL1960w_D2	(326, 387)	var	NQRKQFLKQRNKYADEIKKYINEASSSSGSGRQRRGARNENYDGYESKFYDILKNKRYENVD
PF3D7_1142100.1-p1:transcript=PF3D7_1142100.1:gene=PF3D7_1142100:organism=Plasmodium_falciparum_3D7:gene_product=conserved_Plasmodium_protein__unknown_function:transcript_product=conserved_Plasmodium_protein__unknown_function:location=Pf3D7_11_v3:1681868-1690084(-):protein_length=2738:sequence_SO=chromosome:SO=protein_coding_seq79	PF3D7_1142100.1-p1	(1951, 2012)	PF3D7_1142100.1-p1conserved_Plasmodium_protein__unknown_function	KNNNDAQSYKGINNKTIFLEENNDERYNQENEKEKNYTENKEYLKRNENHNNIEEESFIHLS
PF3D7_1142100.1-p1:transcript=PF3D7_1142100.1:gene=PF3D7_1142100:organism=Plasmodium_falciparum_3D7:gene_product=conserved_Plasmodium_protein__unknown_function:transcript_product=conserved_Plasmodium_protein__unknown_function:location=Pf3D7_11_v3:1681868-1690084(-):protein_length=2738:sequence_SO=chromosome:SO=protein_coding_seq77	PF3D7_1142100.1-p1	(1901, 1962)	PF3D7_1142100.1-p1conserved_Plasmodium_protein__unknown_function	EESSGFNNIQHDNTMKSPVDKHMDHNNVPINEWPGDAHEKELNNIFVNKIKNNNDAQSYKGI
PFIT_0112800.1-p1:transcript=PFIT_0112800.1:gene=PFIT_0112800:organism=Plasmodium_falciparum_IT:gene_product=Pfmc-2TM_Maurer's_cleft_two_transmembrane_protein:transcript_product=Pfmc-2TM_Maurer's_cleft_two_transmembrane_protein:location=PfIT_01_v3:490121-490910(-):protein_length=231:sequence_SO=chromosome:SO=protein_coding_seq4	PFIT_0112800.1-p1	(76, 137)	Pfmc-2TM	DLDPQISSLVSLVDNMDITQEKKDKIKTLTLKYINSDDILEQNKSINELKKYSKNEECKEQM
PF3D7_0404700.1-p1:transcript=PF3D7_0404700.1:gene=PF3D7_0404700:organism=Plasmodium_falciparum_3D7:gene_product=dipeptidyl_aminopeptidase_3:transcript_product=dipeptidyl_aminopeptidase_3:location=Pf3D7_04_v3:260454-263418(-):protein_length=939:sequence_SO=chromosome:SO=protein_coding_seq14	PF3D7_0404700.1-p1	(326, 387)	dipeptidyl_aminopeptidase_3	SSGRFNIDKFCWYGKKVQEHSEQPTNKIPVQNISPLSVNADEYNKLYDEKKKIINNLQKSQD
PF10_0001_D6_seq7	PF10_0001_D6	(151, 212)	var	NTTASDTQNDIQNDGIPSSKITDNEWNTLKDEFISQYLQSEQPKDVPNDYKSGNSSTNTNIT
PF10_0001_D6_seq6	PF10_0001_D6	(126, 187)	var	ASGNNTTASGNNTTASGNNTTASGNNTTASDTQNDIQNDGIPSSKITDNEWNTLKDEFISQY
PF10_0001_D6_seq4	PF10_0001_D6	(76, 137)	var	SGYTDHYSDITSSSESEYEEFDINDIYVPGSPKYKTLIEVVLEPSGNNTTASGNNTTASGNN
PF3D7_0319900.1-p1:transcript=PF3D7_0319900.1:gene=PF3D7_0319900:organism=Plasmodium_falciparum_3D7:gene_product=conserved_Plasmodium_protein__unknown_function:transcript_product=conserved_Plasmodium_protein__unknown_function:location=Pf3D7_03_v3:833833-834777(-):protein_length=314:sequence_SO=chromosome:SO=protein_coding_seq6	PF3D7_0319900.1-p1	(126, 187)	PF3D7_0319900.1-p1conserved_Plasmodium_protein__unknown_function	NWKTYEVNNSNVGIKKNDNKSDHINDNDDNKNDNKSDHINDNDDNKNDNKNDHINDNSNNNK
HB3var2csaB_seq117	HB3var2csaB	(2901, 2962)	var	YSGEEYNYNINMVNNDDIPINRDNNVYSGIDLINDSLSGGEPIDIYDEVLKRKENELFGTNH
IT4var16_seq109	IT4var16	(2701, 2762)	var	STSGNRDSYSDKNDPISDNHHPYSGIDLINDSLNSGNHDIYDEILKRKENELFGTKHHPKHT
PF3D7_1145800.1-p1:transcript=PF3D7_1145800.1:gene=PF3D7_1145800:organism=Plasmodium_falciparum_3D7:gene_product=conserved_Plasmodium_protein__unknown_function:transcript_product=conserved_Plasmodium_protein__unknown_function:location=Pf3D7_11_v3:1814957-1817704(-):protein_length=915:sequence_SO=chromosome:SO=protein_coding_seq4	PF3D7_1145800.1-p1	(76, 137)	PF3D7_1145800.1-p1conserved_Plasmodium_protein__unknown_function	CNHLSPEETRGVINVYDNNKMNQHSNNEMNQNSNNKMNQHCNNKMNQHCNNKMNQHCNNKMN
PF3D7_0509400.1-p1:transcript=PF3D7_0509400.1:gene=PF3D7_0509400:organism=Plasmodium_falciparum_3D7:gene_product=RNA_polymerase_I:transcript_product=RNA_polymerase_I:location=Pf3D7_05_v3:389914-398997(-):protein_length=2914:sequence_SO=chromosome:SO=protein_coding_seq40	PF3D7_0509400.1-p1	(976, 1037)	RNA_polymerase_I	NNKKNTNRTNSIMKNTRNSQYNIIQNDLNNNDSKEDYLKKMSILKNQQSLDDNAKISHPVSN
AAM55194_seq45	AAM55194	(1101, 1162)	var	HDTGNFDDCQLQNEFCDEKSDGKDKEKYAFRDTPNDHDAACACNERDKIQPPKEKKKEACAI
AAM55194_seq44	AAM55194	(1076, 1137)	var	NKSGTSDQSTVIGTNTRYENVGAYLHDTGNFDDCQLQNEFCDEKSDGKDKEKYAFRDTPNDH
PFCLINvar69_seq37	PFCLINvar69	(901, 962)	var	GLREAFIKCAAAETFLLWKKYKEDNNGGEDLQNQLKSGKIPEDFKRQMFYTFGDFRDLCLGT
PFIT_0803800.1-p1:transcript=PFIT_0803800.1:gene=PFIT_0803800:organism=Plasmodium_falciparum_IT:gene_product=Plasmodium_exported_protein_(PHISTc)__unknown_function:transcript_product=Plasmodium_exported_protein_(PHISTc)__unknown_function:location=PfIT_08_v3:138782-142309(-):protein_length=1107:sequence_SO=chromosome:SO=protein_coding_seq24	PFIT_0803800.1-p1	(576, 637)	PFIT_0803800.1-p1Plasmodium_exported_protein_(PHISTc)__unknown_function	RRNFDERNQQVNDRRNFDERNQQVNDRRNFDDRDQNVMDRRNFDERNQQVNDRRNFDERNQQ
PFIT_0803800.1-p1:transcript=PFIT_0803800.1:gene=PFIT_0803800:organism=Plasmodium_falciparum_IT:gene_product=Plasmodium_exported_protein_(PHISTc)__unknown_function:transcript_product=Plasmodium_exported_protein_(PHISTc)__unknown_function:location=PfIT_08_v3:138782-142309(-):protein_length=1107:sequence_SO=chromosome:SO=protein_coding_seq25	PFIT_0803800.1-p1	(601, 662)	PFIT_0803800.1-p1Plasmodium_exported_protein_(PHISTc)__unknown_function	DRRNFDDRDQNVMDRRNFDERNQQVNDRRNFDERNQQVNDRRNFDERNQHVNERRNFDERNQ
PFIT_0803800.1-p1:transcript=PFIT_0803800.1:gene=PFIT_0803800:organism=Plasmodium_falciparum_IT:gene_product=Plasmodium_exported_protein_(PHISTc)__unknown_function:transcript_product=Plasmodium_exported_protein_(PHISTc)__unknown_function:location=PfIT_08_v3:138782-142309(-):protein_length=1107:sequence_SO=chromosome:SO=protein_coding_seq26	PFIT_0803800.1-p1	(626, 687)	PFIT_0803800.1-p1Plasmodium_exported_protein_(PHISTc)__unknown_function	NDRRNFDERNQQVNDRRNFDERNQHVNERRNFDERNQHVNDRRNFDERNQQVNDRRNFDERY
PFIT_0803800.1-p1:transcript=PFIT_0803800.1:gene=PFIT_0803800:organism=Plasmodium_falciparum_IT:gene_product=Plasmodium_exported_protein_(PHISTc)__unknown_function:transcript_product=Plasmodium_exported_protein_(PHISTc)__unknown_function:location=PfIT_08_v3:138782-142309(-):protein_length=1107:sequence_SO=chromosome:SO=protein_coding_seq27	PFIT_0803800.1-p1	(651, 712)	PFIT_0803800.1-p1Plasmodium_exported_protein_(PHISTc)__unknown_function	VNERRNFDERNQHVNDRRNFDERNQQVNDRRNFDERYQNVNERRNFDERNQHVNERRNFDER
PFIT_0803800.1-p1:transcript=PFIT_0803800.1:gene=PFIT_0803800:organism=Plasmodium_falciparum_IT:gene_product=Plasmodium_exported_protein_(PHISTc)__unknown_function:transcript_product=Plasmodium_exported_protein_(PHISTc)__unknown_function:location=PfIT_08_v3:138782-142309(-):protein_length=1107:sequence_SO=chromosome:SO=protein_coding_seq20	PFIT_0803800.1-p1	(476, 537)	PFIT_0803800.1-p1Plasmodium_exported_protein_(PHISTc)__unknown_function	FNKKNLFEQRLQSVEGKNFFEGRSNFDERSQNVEGRSHFDERSQIVEQRRNFDDRDQNIMDR
PFIT_0803800.1-p1:transcript=PFIT_0803800.1:gene=PFIT_0803800:organism=Plasmodium_falciparum_IT:gene_product=Plasmodium_exported_protein_(PHISTc)__unknown_function:transcript_product=Plasmodium_exported_protein_(PHISTc)__unknown_function:location=PfIT_08_v3:138782-142309(-):protein_length=1107:sequence_SO=chromosome:SO=protein_coding_seq21	PFIT_0803800.1-p1	(501, 562)	PFIT_0803800.1-p1Plasmodium_exported_protein_(PHISTc)__unknown_function	FDERSQNVEGRSHFDERSQIVEQRRNFDDRDQNIMDRKNFDERNQQVNDRRNFDERNQQVND
PFIT_0803800.1-p1:transcript=PFIT_0803800.1:gene=PFIT_0803800:organism=Plasmodium_falciparum_IT:gene_product=Plasmodium_exported_protein_(PHISTc)__unknown_function:transcript_product=Plasmodium_exported_protein_(PHISTc)__unknown_function:location=PfIT_08_v3:138782-142309(-):protein_length=1107:sequence_SO=chromosome:SO=protein_coding_seq22	PFIT_0803800.1-p1	(526, 587)	PFIT_0803800.1-p1Plasmodium_exported_protein_(PHISTc)__unknown_function	NFDDRDQNIMDRKNFDERNQQVNDRRNFDERNQQVNDRRNFDDRDQNVMDRRNFDERNQQVN
PFIT_0803800.1-p1:transcript=PFIT_0803800.1:gene=PFIT_0803800:organism=Plasmodium_falciparum_IT:gene_product=Plasmodium_exported_protein_(PHISTc)__unknown_function:transcript_product=Plasmodium_exported_protein_(PHISTc)__unknown_function:location=PfIT_08_v3:138782-142309(-):protein_length=1107:sequence_SO=chromosome:SO=protein_coding_seq23	PFIT_0803800.1-p1	(551, 612)	PFIT_0803800.1-p1Plasmodium_exported_protein_(PHISTc)__unknown_function	RNFDERNQQVNDRRNFDDRDQNVMDRRNFDERNQQVNDRRNFDERNQQVNDRRNFDDRDQNV
PFIT_0803800.1-p1:transcript=PFIT_0803800.1:gene=PFIT_0803800:organism=Plasmodium_falciparum_IT:gene_product=Plasmodium_exported_protein_(PHISTc)__unknown_function:transcript_product=Plasmodium_exported_protein_(PHISTc)__unknown_function:location=PfIT_08_v3:138782-142309(-):protein_length=1107:sequence_SO=chromosome:SO=protein_coding_seq28	PFIT_0803800.1-p1	(676, 737)	PFIT_0803800.1-p1Plasmodium_exported_protein_(PHISTc)__unknown_function	QVNDRRNFDERYQNVNERRNFDERNQHVNERRNFDERYQNVNDRRNFDERNQHVNERRNFDQ
PFIT_0803800.1-p1:transcript=PFIT_0803800.1:gene=PFIT_0803800:organism=Plasmodium_falciparum_IT:gene_product=Plasmodium_exported_protein_(PHISTc)__unknown_function:transcript_product=Plasmodium_exported_protein_(PHISTc)__unknown_function:location=PfIT_08_v3:138782-142309(-):protein_length=1107:sequence_SO=chromosome:SO=protein_coding_seq29	PFIT_0803800.1-p1	(701, 762)	PFIT_0803800.1-p1Plasmodium_exported_protein_(PHISTc)__unknown_function	QHVNERRNFDERYQNVNDRRNFDERNQHVNERRNFDQRAPNVEERRYMDPRNPNIPDVRFPH
PREICHvar38_seq22	PREICHvar38	(526, 587)	var	IGPLKKWAADETAKGAKSQDKGETPGAKGVDRSDSDGKTASQEPSDKNPLDKLREAFIESAA
PF3D7_0932700.1-p1:transcript=PF3D7_0932700.1:gene=PF3D7_0932700:organism=Plasmodium_falciparum_3D7:gene_product=conserved_Plasmodium_protein__unknown_function:transcript_product=conserved_Plasmodium_protein__unknown_function:location=Pf3D7_09_v3:1298865-1302575(-):protein_length=1236:sequence_SO=chromosome:SO=protein_coding_seq17	PF3D7_0932700.1-p1	(401, 462)	PF3D7_0932700.1-p1conserved_Plasmodium_protein__unknown_function	VQVKNDTLNNVQVKNDKLNNVQVKNDKLNNVQVKNDKLNNVQVKNDKLKICQVKFFQSKSDV
IT4var33_seq13	IT4var33	(301, 362)	var	TDPPTYFDYVPQYLRWFEEWAEEFCTKRKHKLQNAITNCRDYAQNLYCSGNGYNCKETIRAE
PF3D7_1220700.1-p1:transcript=PF3D7_1220700.1:gene=PF3D7_1220700:organism=Plasmodium_falciparum_3D7:gene_product=conserved_Plasmodium_protein__unknown_function:transcript_product=conserved_Plasmodium_protein__unknown_function:location=Pf3D7_12_v3:822958-827712(-):protein_length=885:sequence_SO=chromosome:SO=protein_coding_seq20	PF3D7_1220700.1-p1	(476, 537)	PF3D7_1220700.1-p1conserved_Plasmodium_protein__unknown_function	YESSEYIKKDDIYQGYNDTLNCHNKNINEKHTQYVNPENSSSSNNSKDIYNINKRDKLSIHK
PFIT_bin01300.1-p1:transcript=PFIT_bin01300.1:gene=PFIT_bin01300:organism=Plasmodium_falciparum_IT:gene_product=stevor:transcript_product=stevor:location=PfIT_bin_v3_archived_contig_5:49723-50746(+):protein_length=306:sequence_SO=random_sequence:SO=protein_coding_seq4	PFIT_bin01300.1-p1	(76, 137)	Stevor	EAIKKYQETHEPYEQLQELVEKKGTKTVGRNDTEPMSTIEKELLETYEQIFGHETDMLKSDM
PFIT_bin01300.1-p1:transcript=PFIT_bin01300.1:gene=PFIT_bin01300:organism=Plasmodium_falciparum_IT:gene_product=stevor:transcript_product=stevor:location=PfIT_bin_v3_archived_contig_5:49723-50746(+):protein_length=306:sequence_SO=random_sequence:SO=protein_coding_seq5	PFIT_bin01300.1-p1	(101, 162)	Stevor	KTVGRNDTEPMSTIEKELLETYEQIFGHETDMLKSDMSQNDDGKSDKSSSCECTDNNNNTEL
PFIT_bin01300.1-p1:transcript=PFIT_bin01300.1:gene=PFIT_bin01300:organism=Plasmodium_falciparum_IT:gene_product=stevor:transcript_product=stevor:location=PfIT_bin_v3_archived_contig_5:49723-50746(+):protein_length=306:sequence_SO=random_sequence:SO=protein_coding_seq6	PFIT_bin01300.1-p1	(126, 187)	Stevor	FGHETDMLKSDMSQNDDGKSDKSSSCECTDNNNNTELAKTKGKDKYLKHLKHRCTRGIYACS
PFIT_bin01300.1-p1:transcript=PFIT_bin01300.1:gene=PFIT_bin01300:organism=Plasmodium_falciparum_IT:gene_product=stevor:transcript_product=stevor:location=PfIT_bin_v3_archived_contig_5:49723-50746(+):protein_length=306:sequence_SO=random_sequence:SO=protein_coding_seq2	PFIT_bin01300.1-p1	(26, 87)	Stevor	YLNNHYNISLIQNNTKRTTIKSRLLAQTQNHNPHYHNDPELKEIIDKLNEEAIKKYQETHEP
PFIT_bin01300.1-p1:transcript=PFIT_bin01300.1:gene=PFIT_bin01300:organism=Plasmodium_falciparum_IT:gene_product=stevor:transcript_product=stevor:location=PfIT_bin_v3_archived_contig_5:49723-50746(+):protein_length=306:sequence_SO=random_sequence:SO=protein_coding_seq3	PFIT_bin01300.1-p1	(51, 112)	Stevor	AQTQNHNPHYHNDPELKEIIDKLNEEAIKKYQETHEPYEQLQELVEKKGTKTVGRNDTEPMS
IT4var45_seq57	IT4var45	(1401, 1462)	var	IKDKKDANGNIEMLVSDSSKNEFEGNDLKDCQNAGIFKGIRKDEWTCGNVCGYDVCGLKTDN
HB3var40_seq103	HB3var40	(2551, 2612)	var	TTASGKNTTASGNNTTASDTQNDIQNDGIPSSKITDNEWNTLKDEFISNMLQSEQNTEPNML
HB3var40_seq104	HB3var40	(2576, 2637)	var	NDGIPSSKITDNEWNTLKDEFISNMLQSEQNTEPNMLGYNVDNNTNPKTLHVSMDEKPFITS
PF3D7_0809100.1-p1:transcript=PF3D7_0809100.1:gene=PF3D7_0809100:organism=Plasmodium_falciparum_3D7:gene_product=erythrocyte_membrane_protein_1__PfEMP1:transcript_product=erythrocyte_membrane_protein_1__PfEMP1:location=Pf3D7_08_v3:459312-466567(+):protein_length=2109:sequence_SO=chromosome:SO=protein_coding_seq4	PF3D7_0809100.1-p1	(76, 137)	var	GGGREYPCKDRPEVRFSDEYGGQCTDSKIKGNEDNKGGACAPFRRLFLCDQHLSHMKAEKIN
MAL7P1.1_D6_seq9	MAL7P1.1_D6	(201, 262)	var	AHTKLNPTYGYNAIKSELEDFVNRPQFLRWFTEWSDEFCTERSIKIKELETKCNDCTVSESG
IT4var21_seq81	IT4var21	(2001, 2062)	var	NVYSGIDLINDSLSGGKPIDIYDEVLKRKENELFGTENTKRTSTQNVAKITNSDPIHNQLEL
IT4var21_seq80	IT4var21	(1976, 2037)	var	YSGEEYSYNVNMVNSMNDIPINRDNNVYSGIDLINDSLSGGKPIDIYDEVLKRKENELFGTE
PF07_0048_D6_seq10	PF07_0048_D6	(226, 287)	var	TKNVDIPMSDKNDVYSGIDLINDSLNSNNVDIYDEVLKRKENELFGTNHPKHTNTHSVTKSS
PF07_0048_D6_seq11	PF07_0048_D6	(251, 312)	var	NSNNVDIYDEVLKRKENELFGTNHPKHTNTHSVTKSSNSDPIDNQLNLFHKWLDRHRDMCEQ
PFCLINvar33_seq11	PFCLINvar33	(251, 312)	var	NRDQIWKAITCAARGNDLYSKNIGNGTTTVSNAKCREGDENPSTNLDYVPQYLRWYDEWAEH
PFCLINvar33_seq13	PFCLINvar33	(301, 362)	var	QYLRWYDEWAEHFCLVRKHKLENVKEACRGEKGNGYKKYCSREGYDCTQTDLRHNNIFVDLD
IGHvar05_seq102	IGHvar05	(2526, 2587)	var	DNKSSHNHVLNTDVSIQIDMNNPKPKNEFTNMDTSPDKSTIDTILDDLEKYNEPYYYDFYKD
IGHvar05_seq103	IGHvar05	(2551, 2612)	var	KNEFTNMDTSPDKSTIDTILDDLEKYNEPYYYDFYKDDIIYHDVDVEKSSMDDIYVDHNNVT
IGHvar38_seq76	IGHvar38	(1876, 1937)	var	SSGDEKYAFMSDTTDVTSSESEYEEMDINDIYVPGSPKYKTLIEVVLEPSGNNTTASGNNTT
PFCLINvar74_seq129	PFCLINvar74	(3201, 3262)	var	PFNEPYYYDMYDDDIYYDVNDDNDISTVNPNNMEKPSKVKIELDVNKKTIKEKYPIADVWDI
PFCLINvar74_seq128	PFCLINvar74	(3176, 3237)	var	YPNNSSMDTILEDLDKPFNEPYYYDMYDDDIYYDVNDDNDISTVNPNNMEKPSKVKIELDVN
PFCLINvar74_seq126	PFCLINvar74	(3126, 3187)	var	LAKLKEEWENETHSGNTHPSDSNKTLNTDVSIQIHMDNPKPINQFTNMDTYPNNSSMDTILE
PFCLINvar74_seq123	PFCLINvar74	(3051, 3112)	var	INDTLSGNEHIDIYDEVLKRKENELFGTNHVKQTSIHSVAKPARDDPIHNQLNLFHTWLDRH
PFCLINvar74_seq122	PFCLINvar74	(3026, 3087)	var	YNINMVNSMDDPKYVSNNIYSGIDLINDTLSGNEHIDIYDEVLKRKENELFGTNHVKQTSIH
PFIT_0201300.1-p1:transcript=PFIT_0201300.1:gene=PFIT_0201300:organism=Plasmodium_falciparum_IT:gene_product=knob-associated_histidine-rich_protein:transcript_product=knob-associated_histidine-rich_protein:location=PfIT_02_v3:50420-52764(-):protein_length=634:sequence_SO=chromosome:SO=protein_coding_seq24	PFIT_0201300.1-p1	(576, 637)	knob-associated_histidine-rich_protein	ATKGASTTAGSTTGATTGANAVQSKDGTADKNAANNGEQVMSRGQAQLQEAGKKKKKRGCCG
PFIT_0201300.1-p1:transcript=PFIT_0201300.1:gene=PFIT_0201300:organism=Plasmodium_falciparum_IT:gene_product=knob-associated_histidine-rich_protein:transcript_product=knob-associated_histidine-rich_protein:location=PfIT_02_v3:50420-52764(-):protein_length=634:sequence_SO=chromosome:SO=protein_coding_seq21	PFIT_0201300.1-p1	(501, 562)	knob-associated_histidine-rich_protein	STNAATPGAKDKTQGGKTDKTGASTNAATNKGQCAAEGATKGATKEASTSKEATKEASTSKG
PFIT_0201300.1-p1:transcript=PFIT_0201300.1:gene=PFIT_0201300:organism=Plasmodium_falciparum_IT:gene_product=knob-associated_histidine-rich_protein:transcript_product=knob-associated_histidine-rich_protein:location=PfIT_02_v3:50420-52764(-):protein_length=634:sequence_SO=chromosome:SO=protein_coding_seq23	PFIT_0201300.1-p1	(551, 612)	knob-associated_histidine-rich_protein	KEATKEASTSKGATKEASTTEGATKGASTTAGSTTGATTGANAVQSKDGTADKNAANNGEQV
PFIT_0201300.1-p1:transcript=PFIT_0201300.1:gene=PFIT_0201300:organism=Plasmodium_falciparum_IT:gene_product=knob-associated_histidine-rich_protein:transcript_product=knob-associated_histidine-rich_protein:location=PfIT_02_v3:50420-52764(-):protein_length=634:sequence_SO=chromosome:SO=protein_coding_seq22	PFIT_0201300.1-p1	(526, 587)	knob-associated_histidine-rich_protein	NAATNKGQCAAEGATKGATKEASTSKEATKEASTSKGATKEASTTEGATKGASTTAGSTTGA
PFIT_0900200.1-p1:transcript=PFIT_0900200.1:gene=PFIT_0900200:organism=Plasmodium_falciparum_IT:gene_product=rifin:transcript_product=rifin:location=PfIT_09_v3:35974-36972(-):protein_length=332:sequence_SO=chromosome:SO=protein_coding_seq3	PFIT_0900200.1-p1	(51, 112)	rifin	DKEIQKIILKDKLEKELMDKFATLQTDIQNDAIPTCVCEKSLADKTEKFCLNCGVNVGGGVA
PFIT_0900200.1-p1:transcript=PFIT_0900200.1:gene=PFIT_0900200:organism=Plasmodium_falciparum_IT:gene_product=rifin:transcript_product=rifin:location=PfIT_09_v3:35974-36972(-):protein_length=332:sequence_SO=chromosome:SO=protein_coding_seq2	PFIT_0900200.1-p1	(26, 87)	rifin	DRTTQRFHEYDERMKTTRQKCREQCDKEIQKIILKDKLEKELMDKFATLQTDIQNDAIPTCV
PFIT_0900200.1-p1:transcript=PFIT_0900200.1:gene=PFIT_0900200:organism=Plasmodium_falciparum_IT:gene_product=rifin:transcript_product=rifin:location=PfIT_09_v3:35974-36972(-):protein_length=332:sequence_SO=chromosome:SO=protein_coding_seq1	PFIT_0900200.1-p1	(1, 62)	rifin	CECELYSPTNYDSDPEMKRVMQQFVDRTTQRFHEYDERMKTTRQKCREQCDKEIQKIILKDK
RAJ116var38_seq82	RAJ116var38	(2026, 2087)	var	KKEFSNMDTNVDTPTMDNMEDDIYYDVNDDENPSVYDIPMDHNKVDVPKKVHVEMKILNNTS
PF3D7_0826100.1-p1:transcript=PF3D7_0826100.1:gene=PF3D7_0826100:organism=Plasmodium_falciparum_3D7:gene_product=E3_ubiquitin-protein_ligase__putative:transcript_product=E3_ubiquitin-protein_ligase__putative:location=Pf3D7_08_v3:1113369-1139144(-):protein_length=8591:sequence_SO=chromosome:SO=protein_coding_seq242	PF3D7_0826100.1-p1	(6026, 6087)	PF3D7_0826100.1-p1E3_ubiquitin-protein_ligase__putative	NNNNENDNNNNISQTRVNNNDQRQVSDLNKDKNQIKDKGSKIEKTEMLTKKYNKNQAQFNMV
TM284S2var1_seq54	TM284S2var1	(1326, 1387)	var	LSWHKYKEDKKKENPTEEAPSLDVEAQTQLNDGIIPEEFKRQMFYTFGDYRDLCLGKDIGND
PF3D7_1414500.1-p1:transcript=PF3D7_1414500.1:gene=PF3D7_1414500:organism=Plasmodium_falciparum_3D7:gene_product=atypical_protein_kinase__ABC-1_family__putative:transcript_product=atypical_protein_kinase__ABC-1_family__putative:location=Pf3D7_14_v3:578369-587529(-):protein_length=2758:sequence_SO=chromosome:SO=protein_coding_seq101	PF3D7_1414500.1-p1	(2501, 2562)	PF3D7_1414500.1-p1atypical_protein_kinase__ABC-1_family__putative	NKENENEEKNKNNKNNYIHNSSNNIKNDQEKSSLNDNKNFDNKLKMYVDNFNIKQYNKYISL
PF3D7_0707200.1-p1:transcript=PF3D7_0707200.1:gene=PF3D7_0707200:organism=Plasmodium_falciparum_3D7:gene_product=conserved_Plasmodium_protein__unknown_function:transcript_product=conserved_Plasmodium_protein__unknown_function:location=Pf3D7_07_v3:329936-336325(-):protein_length=2129:sequence_SO=chromosome:SO=protein_coding_seq41	PF3D7_0707200.1-p1	(1001, 1062)	PF3D7_0707200.1-p1conserved_Plasmodium_protein__unknown_function	ISDDKKISDDKKISDDKKISDDKKISDDKKISDDKKISDDKKISDDKKISDDKKISDDKKIS
PF3D7_0617200.1-p1:transcript=PF3D7_0617200.1:gene=PF3D7_0617200:organism=Plasmodium_falciparum_3D7:gene_product=conserved_Plasmodium_protein__unknown_function:transcript_product=conserved_Plasmodium_protein__unknown_function:location=Pf3D7_06_v3:717050-718917(+):protein_length=446:sequence_SO=chromosome:SO=protein_coding_seq13	PF3D7_0617200.1-p1	(301, 362)	PF3D7_0617200.1-p1conserved_Plasmodium_protein__unknown_function	AYLKKLQEEFKLEESKKQQNAAKKINGEVETNENKDDNKTKNENNNKKAKSKKDKQKTFKLD
RAJ116var08_seq31	RAJ116var08	(751, 812)	var	AEIMQQDAREQLEKRGGESKLKGDATKGEYKRGGQKKNLNGHICNIDKNYTNDTRSYGGPCH
PF3D7_1131600.1-p1:transcript=PF3D7_1131600.1:gene=PF3D7_1131600:organism=Plasmodium_falciparum_3D7:gene_product=conserved_Plasmodium_protein__unknown_function:transcript_product=conserved_Plasmodium_protein__unknown_function:location=Pf3D7_11_v3:1216521-1224812(+):protein_length=2763:sequence_SO=chromosome:SO=protein_coding_seq95	PF3D7_1131600.1-p1	(2351, 2412)	PF3D7_1131600.1-p1conserved_Plasmodium_protein__unknown_function	NGNDHINGNNHIIGNNHINGNNHINGNNHINGNDHINGNDHIIGNNHIIGNNHINGNNHING
PF3D7_1131600.1-p1:transcript=PF3D7_1131600.1:gene=PF3D7_1131600:organism=Plasmodium_falciparum_3D7:gene_product=conserved_Plasmodium_protein__unknown_function:transcript_product=conserved_Plasmodium_protein__unknown_function:location=Pf3D7_11_v3:1216521-1224812(+):protein_length=2763:sequence_SO=chromosome:SO=protein_coding_seq94	PF3D7_1131600.1-p1	(2326, 2387)	PF3D7_1131600.1-p1conserved_Plasmodium_protein__unknown_function	INGNDHINGNDHINGNDHINGNDHINGNDHINGNNHIIGNNHINGNNHINGNNHINGNDHIN
PF3D7_1131600.1-p1:transcript=PF3D7_1131600.1:gene=PF3D7_1131600:organism=Plasmodium_falciparum_3D7:gene_product=conserved_Plasmodium_protein__unknown_function:transcript_product=conserved_Plasmodium_protein__unknown_function:location=Pf3D7_11_v3:1216521-1224812(+):protein_length=2763:sequence_SO=chromosome:SO=protein_coding_seq90	PF3D7_1131600.1-p1	(2226, 2287)	PF3D7_1131600.1-p1conserved_Plasmodium_protein__unknown_function	EETRNILVELVKSYNEEKDEYMRNDKDIPNHNFMNNYINHNHNDNIEFNEKREEDTNKNILD
IT4var16_seq61	IT4var16	(1501, 1562)	var	KKNEFNKQNNKFVRNAYEPNADQEYNDYKLKEGKGPSKQGNHYLLDKCDNKKCSCMEGNVLT
PF3D7_1419100.1-p1:transcript=PF3D7_1419100.1:gene=PF3D7_1419100:organism=Plasmodium_falciparum_3D7:gene_product=ATP-dependent_rRNA_helicase_SPB4__putative:transcript_product=ATP-dependent_rRNA_helicase_SPB4__putative:location=Pf3D7_14_v3:793752-796877(+):protein_length=1041:sequence_SO=chromosome:SO=protein_coding_seq22	PF3D7_1419100.1-p1	(526, 587)	PF3D7_1419100.1-p1ATP-dependent_rRNA_helicase_SPB4__putative	NKKNKNKIYKGIHNDNVDNINVDNISVDNISVDNINVDNHIDYIFQLNSKYNNIFSDADMAN
PF3D7_0728100.1-p1:transcript=PF3D7_0728100.1:gene=PF3D7_0728100:organism=Plasmodium_falciparum_3D7:gene_product=conserved_Plasmodium_membrane_protein__unknown_function:transcript_product=conserved_Plasmodium_membrane_protein__unknown_function:location=Pf3D7_07_v3:1193616-1210301(-):protein_length=5561:sequence_SO=chromosome:SO=protein_coding_seq205	PF3D7_0728100.1-p1	(5101, 5162)	PF3D7_0728100.1-p1conserved_Plasmodium_membrane_protein__unknown_function	EKKKKKKNHVIINDNNINKALYNKGVFSSTNNNIEKDKLTNKSSICVDKKNKNEYKTNEKVI
PF3D7_0500400.1-p1:transcript=PF3D7_0500400.1:gene=PF3D7_0500400:organism=Plasmodium_falciparum_3D7:gene_product=rifin:transcript_product=rifin:location=Pf3D7_05_v3:33056-34378(-):protein_length=374:sequence_SO=chromosome:SO=protein_coding_seq11	PF3D7_0500400.1-p1	(251, 312)	rifin	AGEVILDKCNAFDMGFGILKKDGVTNGLLPKDAVPRVLKGIVGQAEGPAKVAADAARQTVTA
PF3D7_0507800.1-p1:transcript=PF3D7_0507800.1:gene=PF3D7_0507800:organism=Plasmodium_falciparum_3D7:gene_product=conserved_Plasmodium_protein__unknown_function:transcript_product=conserved_Plasmodium_protein__unknown_function:location=Pf3D7_05_v3:322239-326822(+):protein_length=1527:sequence_SO=chromosome:SO=protein_coding_seq43	PF3D7_0507800.1-p1	(1051, 1112)	PF3D7_0507800.1-p1conserved_Plasmodium_protein__unknown_function	KSGDDNKSDDDNKNGDDNKNGDDNKSDDDNKSDDGNFFVENITPEERNKIDEFLKKHNYLYK
PF3D7_1116700.1-p1:transcript=PF3D7_1116700.1:gene=PF3D7_1116700:organism=Plasmodium_falciparum_3D7:gene_product=dipeptidyl_aminopeptidase_1:transcript_product=dipeptidyl_aminopeptidase_1:location=Pf3D7_11_v3:630779-632881(-):protein_length=700:sequence_SO=chromosome:SO=protein_coding_seq14	PF3D7_1116700.1-p1	(326, 387)	dipeptidyl_aminopeptidase_1	PTLIQLNNNLKNTTQTGNKDTNEMDLENYEDTLNSPKRELEINELPKNFTWGDPWNKNTREY
PF3D7_0504800.1-p1:transcript=PF3D7_0504800.1:gene=PF3D7_0504800:organism=Plasmodium_falciparum_3D7:gene_product=conserved_Plasmodium_protein__unknown_function:transcript_product=conserved_Plasmodium_protein__unknown_function:location=Pf3D7_05_v3:187813-204732(-):protein_length=5639:sequence_SO=chromosome:SO=protein_coding_seq28	PF3D7_0504800.1-p1	(676, 737)	PF3D7_0504800.1-p1conserved_Plasmodium_protein__unknown_function	TEKCNNGKKGETTEKCKNALELEEAKFCEKNNSSEHQSYVNNISYDNCNNNIKNSKFRNYTQ
PF3D7_1425300.1-p1:transcript=PF3D7_1425300.1:gene=PF3D7_1425300:organism=Plasmodium_falciparum_3D7:gene_product=conserved_Plasmodium_protein__unknown_function:transcript_product=conserved_Plasmodium_protein__unknown_function:location=Pf3D7_14_v3:985365-987755(-):protein_length=307:sequence_SO=chromosome:SO=protein_coding_seq8	PF3D7_1425300.1-p1	(176, 237)	PF3D7_1425300.1-p1conserved_Plasmodium_protein__unknown_function	EKIKEIYENTVDKLSSQHNEKENQLKENLRDSTKRKVENLIVENNVLSSRIISKDTDEGKKH
DD2var04_seq75	DD2var04	(1851, 1912)	var	GNTKLDKFASRPQYFRWLEEWGEEFCRKKQKKIENIKKDCRVENGKKECSGDGFECNKIGPN
PF3D7_1366400.1-p1:transcript=PF3D7_1366400.1:gene=PF3D7_1366400:organism=Plasmodium_falciparum_3D7:gene_product=rhoptry_protein_RHOP148:transcript_product=rhoptry_protein_RHOP148:location=Pf3D7_13_v3:2655277-2659065(-):protein_length=1262:sequence_SO=chromosome:SO=protein_coding_seq38	PF3D7_1366400.1-p1	(926, 987)	rhoptry_protein_RHOP148	SGDQLSECTEIYEKKNKLTNEQNCCDNSSSEKNISNMKPNYIIDKDYNNNEDNTILSKQTYL
PF3D7_1240600.1-p1:transcript=PF3D7_1240600.1:gene=PF3D7_1240600:organism=Plasmodium_falciparum_3D7:gene_product=erythrocyte_membrane_protein_1__PfEMP1:transcript_product=erythrocyte_membrane_protein_1__PfEMP1:location=Pf3D7_12_v3:1719574-1727456(+):protein_length=2359:sequence_SO=chromosome:SO=protein_coding_seq17	PF3D7_1240600.1-p1	(401, 462)	var	ADEIKKYINEASSSSGSGRQRRGARNENYDGYESKFYDILKNKRYENVDAFLGLLNNEKACQ
PFIT_1037600.1-p1:transcript=PFIT_1037600.1:gene=PFIT_1037600:organism=Plasmodium_falciparum_IT:gene_product=gametocyte-specific_protein:transcript_product=gametocyte-specific_protein:location=PfIT_10_v3:1449546-1470959(+):protein_length=7099:sequence_SO=chromosome:SO=protein_coding_seq259	PFIT_1037600.1-p1	(6451, 6512)	gametocyte-specific_protein	EEVIPEVLVEEEVPEELVEEVIPEELVEEMLPEELIEVVVPEELVEEVVPEIVEEVVPEELV
PFIT_1037600.1-p1:transcript=PFIT_1037600.1:gene=PFIT_1037600:organism=Plasmodium_falciparum_IT:gene_product=gametocyte-specific_protein:transcript_product=gametocyte-specific_protein:location=PfIT_10_v3:1449546-1470959(+):protein_length=7099:sequence_SO=chromosome:SO=protein_coding_seq258	PFIT_1037600.1-p1	(6426, 6487)	gametocyte-specific_protein	VVPEELVEEVVPEELVEEVIPEELVEEVIPEVLVEEEVPEELVEEVIPEELVEEMLPEELIE
PFIT_1037600.1-p1:transcript=PFIT_1037600.1:gene=PFIT_1037600:organism=Plasmodium_falciparum_IT:gene_product=gametocyte-specific_protein:transcript_product=gametocyte-specific_protein:location=PfIT_10_v3:1449546-1470959(+):protein_length=7099:sequence_SO=chromosome:SO=protein_coding_seq255	PFIT_1037600.1-p1	(6351, 6412)	gametocyte-specific_protein	VLEEVIPEKLVEEVVPVELLEEVIPEELIEEVVPEVLVEVIPEKVVEEVIPEELVEEVIPEE
PFIT_1037600.1-p1:transcript=PFIT_1037600.1:gene=PFIT_1037600:organism=Plasmodium_falciparum_IT:gene_product=gametocyte-specific_protein:transcript_product=gametocyte-specific_protein:location=PfIT_10_v3:1449546-1470959(+):protein_length=7099:sequence_SO=chromosome:SO=protein_coding_seq251	PFIT_1037600.1-p1	(6251, 6312)	gametocyte-specific_protein	EELVEEVIPEELVEEVIPEEVPEEVVPEELVEEVISEELVEEVIPEELVEEVIPEEVVEEVV
PF3D7_0202200.1-p1:transcript=PF3D7_0202200.1:gene=PF3D7_0202200:organism=Plasmodium_falciparum_3D7:gene_product=EMP1-trafficking_protein:transcript_product=EMP1-trafficking_protein:location=Pf3D7_02_v3:112547-113682(-):protein_length=290:sequence_SO=chromosome:SO=protein_coding_seq6	PF3D7_0202200.1-p1	(126, 187)	PF3D7_0202200.1-p1EMP1-trafficking_protein	VFKNHLPLPASITKGDSEAEAGGNDSRNTSEKAVSSSNDDNNTNDEGKDKRKLKGICKVKKL
PFIT_1037600.1-p1:transcript=PFIT_1037600.1:gene=PFIT_1037600:organism=Plasmodium_falciparum_IT:gene_product=gametocyte-specific_protein:transcript_product=gametocyte-specific_protein:location=PfIT_10_v3:1449546-1470959(+):protein_length=7099:sequence_SO=chromosome:SO=protein_coding_seq250	PFIT_1037600.1-p1	(6226, 6287)	gametocyte-specific_protein	VVEEVVPEELVEEVIPEEVVEKVVPEELVEEVIPEELVEEVIPEEVPEEVVPEELVEEVISE
PFCLINvar63_seq65	PFCLINvar63	(1601, 1662)	var	DVVDCLLDKLEDKAKKCKDPSSGEKQANCGEYTSPDDEEDLLLEEENTVEAPKICENVLKTP
PFIT_1439600.1-p1:transcript=PFIT_1439600.1:gene=PFIT_1439600:organism=Plasmodium_falciparum_IT:gene_product=metacaspase-like_protein:transcript_product=metacaspase-like_protein:location=PfIT_14_v3:1574568-1582351(+):protein_length=2014:sequence_SO=chromosome:SO=protein_coding_seq31	PFIT_1439600.1-p1	(751, 812)	metacaspase-like_protein	YNDYTNLPNVETYVLSEKSNNLENKEDNNINEKFKNDNNVDKKNNDENNIIKHNVNQNNNEV
PFIT_bin00600.1-p1:transcript=PFIT_bin00600.1:gene=PFIT_bin00600:organism=Plasmodium_falciparum_IT:gene_product=stevor:transcript_product=stevor:location=PfIT_bin_v3_archived_contig_3:51023-52011(-):protein_length=296:sequence_SO=random_sequence:SO=protein_coding_seq5	PFIT_bin00600.1-p1	(101, 162)	Stevor	KYTGGNDTEPMSTLEKELLETYEEVFGNESDMLKSGMSPNVDEKSSACECTDINNIKLGKTK
PFIT_bin00600.1-p1:transcript=PFIT_bin00600.1:gene=PFIT_bin00600:organism=Plasmodium_falciparum_IT:gene_product=stevor:transcript_product=stevor:location=PfIT_bin_v3_archived_contig_3:51023-52011(-):protein_length=296:sequence_SO=random_sequence:SO=protein_coding_seq4	PFIT_bin00600.1-p1	(76, 137)	Stevor	EAIKKYQQTHDPYKQLKEVVEKSGTKYTGGNDTEPMSTLEKELLETYEEVFGNESDMLKSGM
PFIT_bin00600.1-p1:transcript=PFIT_bin00600.1:gene=PFIT_bin00600:organism=Plasmodium_falciparum_IT:gene_product=stevor:transcript_product=stevor:location=PfIT_bin_v3_archived_contig_3:51023-52011(-):protein_length=296:sequence_SO=random_sequence:SO=protein_coding_seq6	PFIT_bin00600.1-p1	(126, 187)	Stevor	FGNESDMLKSGMSPNVDEKSSACECTDINNIKLGKTKGRDKYLKHLKHRCIGGICSCTVGSA
PF3D7_1300100.1-p1:transcript=PF3D7_1300100.1:gene=PF3D7_1300100:organism=Plasmodium_falciparum_3D7:gene_product=erythrocyte_membrane_protein_1__PfEMP1:transcript_product=erythrocyte_membrane_protein_1__PfEMP1:location=Pf3D7_13_v3:21364-28787(+):protein_length=2162:sequence_SO=chromosome:SO=protein_coding_seq41	PF3D7_1300100.1-p1	(1001, 1062)	var	GLDPFGGSVDDEASTPDPQTQLQSGTIPPDFLRQMFYTLGDYRDICIGGDRDIVGDTIVSNK
PF08_0141_D5_seq9	PF08_0141_D5	(201, 262)	var	VQKTLTTKTIYDYDTVTFDGTTKLEDFSKRPQFLRWMTEWGEEFCKKRKEQLENLKDKCPDY
PFIT_0111400.1-p1:transcript=PFIT_0111400.1:gene=PFIT_0111400:organism=Plasmodium_falciparum_IT:gene_product=glutamic_acid-rich_protein:transcript_product=glutamic_acid-rich_protein:location=PfIT_01_v3:430225-432454(-):protein_length=671:sequence_SO=chromosome:SO=protein_coding_seq21	PFIT_0111400.1-p1	(501, 562)	glutamic_acid-rich_protein	KNLSIQEQLIGTIGRVNVVPRRDNHKKKMAKIEEAELQKQKHVDKEEDKKEESKEVEEESKE
PFIT_0111400.1-p1:transcript=PFIT_0111400.1:gene=PFIT_0111400:organism=Plasmodium_falciparum_IT:gene_product=glutamic_acid-rich_protein:transcript_product=glutamic_acid-rich_protein:location=PfIT_01_v3:430225-432454(-):protein_length=671:sequence_SO=chromosome:SO=protein_coding_seq20	PFIT_0111400.1-p1	(476, 537)	glutamic_acid-rich_protein	LSQPQCKLIDEPEQLTLMDKSKVEEKNLSIQEQLIGTIGRVNVVPRRDNHKKKMAKIEEAEL
DD2var28_seq48	DD2var28	(1176, 1237)	var	ECQVQKQFCKKRNGETPPTGTQEDDDYTFREKPKDHDGKCSCDKPPKKDACDIVDGILAGKK
PFCLINvar64_seq23	PFCLINvar64	(551, 612)	var	TNGSSGDCGGTNSDSSLCEPWQCYEGKHVQKDQNAQEDDDDGEYDKDYTNIENAGGLCILQN
PFIT_0109000.1-p1:transcript=PFIT_0109000.1:gene=PFIT_0109000:organism=Plasmodium_falciparum_IT:gene_product=bromodomain_protein__putative:transcript_product=bromodomain_protein__putative:location=PfIT_01_v3:337425-344401(+):protein_length=2272:sequence_SO=chromosome:SO=protein_coding_seq11	PFIT_0109000.1-p1	(251, 312)	PFIT_0109000.1-p1bromodomain_protein__putative	NHKATSKGNDNNNKVGGTQNVAEEISTTKGKLNNIKKSKNNNKCDDNNINNNNNNNCDDNNN
PFIT_0109000.1-p1:transcript=PFIT_0109000.1:gene=PFIT_0109000:organism=Plasmodium_falciparum_IT:gene_product=bromodomain_protein__putative:transcript_product=bromodomain_protein__putative:location=PfIT_01_v3:337425-344401(+):protein_length=2272:sequence_SO=chromosome:SO=protein_coding_seq10	PFIT_0109000.1-p1	(226, 287)	PFIT_0109000.1-p1bromodomain_protein__putative	GTHMNRITKEEKPSNISCIRGNNKNNHKATSKGNDNNNKVGGTQNVAEEISTTKGKLNNIKK
PF3D7_0223500.1-p1:transcript=PF3D7_0223500.1:gene=PF3D7_0223500:organism=Plasmodium_falciparum_3D7:gene_product=erythrocyte_membrane_protein_1__PfEMP1:transcript_product=erythrocyte_membrane_protein_1__PfEMP1:location=Pf3D7_02_v3:916352-923648(-):protein_length=2177:sequence_SO=chromosome:SO=protein_coding_seq4	PF3D7_0223500.1-p1	(76, 137)	var	SNRYPCKNLKGITNEERFSDTLGGQCTNKKIKGNEYSTKSGKDCGACAPYRRLHLCSHNLES
PF3D7_1035200.1-p1:transcript=PF3D7_1035200.1:gene=PF3D7_1035200:organism=Plasmodium_falciparum_3D7:gene_product=S-antigen:transcript_product=S-antigen:location=Pf3D7_10_v3:1394839-1396596(+):protein_length=585:sequence_SO=chromosome:SO=protein_coding_seq7	PF3D7_1035200.1-p1	(151, 212)	S-antigen	DKVSNGGEDEVSNGREDKVSNGGEDEVSNGREDKVSNGGEDEVSNGREDKVSNGREDKVSNG
PF3D7_0504700.1-p1:transcript=PF3D7_0504700.1:gene=PF3D7_0504700:organism=Plasmodium_falciparum_3D7:gene_product=centrosomal_protein_CEP120__putative:transcript_product=centrosomal_protein_CEP120__putative:location=Pf3D7_05_v3:180421-187470(+):protein_length=2349:sequence_SO=chromosome:SO=protein_coding_seq87	PF3D7_0504700.1-p1	(2151, 2212)	PF3D7_0504700.1-p1centrosomal_protein_CEP120__putative	SKHHTDILYNNNNEEKENGPHKNFNVNENIKNVIYEDNYNQCIKRKRNSPPTSYKTIIDRER
PF3D7_0404100.1-p1:transcript=PF3D7_0404100.1:gene=PF3D7_0404100:organism=Plasmodium_falciparum_3D7:gene_product=AP2_domain_transcription_factor_AP2-SP2__putative:transcript_product=AP2_domain_transcription_factor_AP2-SP2__putative:location=Pf3D7_04_v3:224779-231733(-):protein_length=2271:sequence_SO=chromosome:SO=protein_coding_seq8	PF3D7_0404100.1-p1	(176, 237)	PF3D7_0404100.1-p1AP2_domain_transcription_factor_AP2-SP2__putative	FVNNKMGIDNIEGEHKDGIISPNNYIKLKNINENDKINNNDRINNNDKINNNDNINNKKKSS
PFCLINvar69_seq78	PFCLINvar69	(1926, 1987)	var	GKKGDSVLKGDISQAKFKDGGKPSNLNGVCSITKDYTNDKRGSNKGGPCKGKDNDNNGVRMK
PFCLINvar69_seq77	PFCLINvar69	(1901, 1962)	var	AQEIQKEVKKGMLERSVKEGDKGKSGKKGDSVLKGDISQAKFKDGGKPSNLNGVCSITKDYT
DD2var34_seq31	DD2var34	(751, 812)	var	NEEKSKNSLNAEEAEELKHLRQMLQETAVVNGGVAASGVGGTCGANGQKTLMDKLIEHEEGE
DD2var34_seq30	DD2var34	(726, 787)	var	IVKQTGCDPGVTLQEVLKLQFLNENNEEKSKNSLNAEEAEELKHLRQMLQETAVVNGGVAAS
PFIT_1037600.1-p1:transcript=PFIT_1037600.1:gene=PFIT_1037600:organism=Plasmodium_falciparum_IT:gene_product=gametocyte-specific_protein:transcript_product=gametocyte-specific_protein:location=PfIT_10_v3:1449546-1470959(+):protein_length=7099:sequence_SO=chromosome:SO=protein_coding_seq211	PFIT_1037600.1-p1	(5251, 5312)	gametocyte-specific_protein	VVPEEVPEEVVPEELVEEVISEELVEDVIPEELVEEFIPEELVEEVIPEELVEEVIPEVLVE
PFIT_1037600.1-p1:transcript=PFIT_1037600.1:gene=PFIT_1037600:organism=Plasmodium_falciparum_IT:gene_product=gametocyte-specific_protein:transcript_product=gametocyte-specific_protein:location=PfIT_10_v3:1449546-1470959(+):protein_length=7099:sequence_SO=chromosome:SO=protein_coding_seq210	PFIT_1037600.1-p1	(5226, 5287)	gametocyte-specific_protein	HEEVPEEVVPEKLVEEVIPEELFEEVVPEEVPEEVVPEELVEEVISEELVEDVIPEELVEEF
PFIT_1037600.1-p1:transcript=PFIT_1037600.1:gene=PFIT_1037600:organism=Plasmodium_falciparum_IT:gene_product=gametocyte-specific_protein:transcript_product=gametocyte-specific_protein:location=PfIT_10_v3:1449546-1470959(+):protein_length=7099:sequence_SO=chromosome:SO=protein_coding_seq215	PFIT_1037600.1-p1	(5351, 5412)	gametocyte-specific_protein	VPEELVEKVVAEEIVEEVIPEEVVEEVITEKPAEEVIPEELVEEVIPEEIVEEVVPEELVEE
PFIT_1037600.1-p1:transcript=PFIT_1037600.1:gene=PFIT_1037600:organism=Plasmodium_falciparum_IT:gene_product=gametocyte-specific_protein:transcript_product=gametocyte-specific_protein:location=PfIT_10_v3:1449546-1470959(+):protein_length=7099:sequence_SO=chromosome:SO=protein_coding_seq214	PFIT_1037600.1-p1	(5326, 5387)	gametocyte-specific_protein	EELVEEVIPEVLVEEVVTEEVPEEVVPEELVEKVVAEEIVEEVIPEEVVEEVITEKPAEEVI
PFA0015c_D4_seq6	PFA0015c_D4	(126, 187)	var	NTPSKGDGNTVGDDMVPTTNTFTDEEWSELKHDFISNMLQNQPNDVPNDYKSGDIPFNTQPN
RAJ116var33_seq112	RAJ116var33	(2776, 2837)	var	DSLNSDQHIDIYDEVVKRKENELFGTNNTKKNTSTNSVAKNTNSDPITNQLELFHKWLDRHR
IT4var45_seq17	IT4var45	(401, 462)	var	SGGGSGRKKSGASKSNYDGYESKFYDKFKTGYNNVDEFLELLSTEKTCKEVKDDKEEGIINF
IT4var45_seq19	IT4var45	(451, 512)	var	VKDDKEEGIINFKNVNSGKNSDGSNKTFYRTTYCEACPWCGVNGTKGNWTPKNDDDCKPGNE
PFB0010w_D5_seq10	PFB0010w_D5	(226, 287)	var	NNDIPISGKNGTYSGIDLINDSLNSNNVDIYDEVLKRKENELFGTNHTKKNTSTNSVAKELC
PF3D7_1202100.1-p1:transcript=PF3D7_1202100.1:gene=PF3D7_1202100:organism=Plasmodium_falciparum_3D7:gene_product=SRAP_domain-containing_protein__putative:transcript_product=SRAP_domain-containing_protein__putative:location=Pf3D7_12_v3:113787-115923(+):protein_length=401:sequence_SO=chromosome:SO=protein_coding_seq8	PF3D7_1202100.1-p1	(176, 237)	PF3D7_1202100.1-p1SRAP_domain-containing_protein__putative	KEEIKNEIKDEAKGEVKDEAKGEVKDEAKGEVKDEAKDEIKDEAKDEAKDEAKDEAKDEAKE
PF3D7_1479500.1-p1:transcript=PF3D7_1479500.1:gene=PF3D7_1479500:organism=Plasmodium_falciparum_3D7:gene_product=stevor:transcript_product=stevor:location=Pf3D7_14_v3:3269494-3270496(+):protein_length=299:sequence_SO=chromosome:SO=protein_coding_seq5	PF3D7_1479500.1-p1	(101, 162)	Stevor	KYTGGNDAEPMSTLEKELLETYEEIFGNESDMLKSGMSPNVDEKSSTCECTDINNIKLGKTK
PF3D7_0207600.1-p1:transcript=PF3D7_0207600.1:gene=PF3D7_0207600:organism=Plasmodium_falciparum_3D7:gene_product=serine_repeat_antigen_5:transcript_product=serine_repeat_antigen_5:location=Pf3D7_02_v3:303593-307027(-):protein_length=997:sequence_SO=chromosome:SO=protein_coding_seq2	PF3D7_0207600.1-p1	(26, 87)	serine_repeat_antigen_5	SQTGNTGGGQAGNTGGDQAGSTGGSPQGSTGASPQGSTGASPQGSTGASQPGSSEPSNPVSS
PF3D7_0207600.1-p1:transcript=PF3D7_0207600.1:gene=PF3D7_0207600:organism=Plasmodium_falciparum_3D7:gene_product=serine_repeat_antigen_5:transcript_product=serine_repeat_antigen_5:location=Pf3D7_02_v3:303593-307027(-):protein_length=997:sequence_SO=chromosome:SO=protein_coding_seq3	PF3D7_0207600.1-p1	(51, 112)	serine_repeat_antigen_5	PQGSTGASPQGSTGASPQGSTGASQPGSSEPSNPVSSGHSVSTVSVSQTSTSSEKQDTIQVK
PFL0030c_D8_seq7	PFL0030c_D8	(151, 212)	var	IEQYLQNIQKDFILHDSMDEKPFITQIQDRFLDSSHEEVTYNIDWNVPENINRITNNMDDPK
PFIT_0310100.1-p1:transcript=PFIT_0310100.1:gene=PFIT_0310100:organism=Plasmodium_falciparum_IT:gene_product=phd_finger_protein__putative:transcript_product=phd_finger_protein__putative:location=PfIT_03_v3:372405-385094(+):protein_length=4229:sequence_SO=chromosome:SO=protein_coding_seq148	PFIT_0310100.1-p1	(3676, 3737)	PFIT_0310100.1-p1phd_finger_protein__putative	IKKKDDIKKKDDIKKDDIKKDDIKMDDVKDDIKKDDIKDDIKKDDIKKKDDIKKDDIKMDDV
PREICHvar82_seq29	PREICHvar82	(701, 762)	var	NKDKYAFKDTPKDHNDACNCQSRPPPAKKPEGDHNDLGRSERSGEDGMTPRLSPQPPQEKSQ
PF3D7_0930500.1-p1:transcript=PF3D7_0930500.1:gene=PF3D7_0930500:organism=Plasmodium_falciparum_3D7:gene_product=diacylglycerol_kinase__putative:transcript_product=diacylglycerol_kinase__putative:location=Pf3D7_09_v3:1212169-1216500(-):protein_length=1360:sequence_SO=chromosome:SO=protein_coding_seq42	PF3D7_0930500.1-p1	(1026, 1087)	PF3D7_0930500.1-p1diacylglycerol_kinase__putative	ARLALHFDNIRKKYPHFFNSRIGNKILYGEVGFRDFCFNTYKYKLNKNIKIYCDGKKVNIEE
PFIT_1228500.1-p1:transcript=PFIT_1228500.1:gene=PFIT_1228500:organism=Plasmodium_falciparum_IT:gene_product=conserved_Plasmodium_protein__unknown_function:transcript_product=conserved_Plasmodium_protein__unknown_function:location=PfIT_12_v3:1121130-1130633(-):protein_length=3167:sequence_SO=chromosome:SO=protein_coding_seq77	PFIT_1228500.1-p1	(1901, 1962)	PFIT_1228500.1-p1conserved_Plasmodium_protein__unknown_function	SNYNVEMFNKNNRLEDCEEMRDIKKHKKNDMKKNKNNKNNKNNNNNNKEKDDNYNIKNTNEK
PFIT_1228500.1-p1:transcript=PFIT_1228500.1:gene=PFIT_1228500:organism=Plasmodium_falciparum_IT:gene_product=conserved_Plasmodium_protein__unknown_function:transcript_product=conserved_Plasmodium_protein__unknown_function:location=PfIT_12_v3:1121130-1130633(-):protein_length=3167:sequence_SO=chromosome:SO=protein_coding_seq78	PFIT_1228500.1-p1	(1926, 1987)	PFIT_1228500.1-p1conserved_Plasmodium_protein__unknown_function	HKKNDMKKNKNNKNNKNNNNNNKEKDDNYNIKNTNEKMIKNEKDNCNNIENVHYKKIMDKIF
IT4var07_seq50	IT4var07	(1226, 1287)	var	PNPCVNGGDKTRVGKITSVTEIATKMHGEANETMLKNSSNGNDKGESKLKGKAEEGDYSRGG
PFIT_1108900.1-p1:transcript=PFIT_1108900.1:gene=PFIT_1108900:organism=Plasmodium_falciparum_IT:gene_product=conserved_Plasmodium_protein__unknown_function:transcript_product=conserved_Plasmodium_protein__unknown_function:location=PfIT_11_v3:287980-292101(+):protein_length=1294:sequence_SO=chromosome:SO=protein_coding_seq17	PFIT_1108900.1-p1	(401, 462)	PFIT_1108900.1-p1conserved_Plasmodium_protein__unknown_function	DVYVKKDIDEKDNIDNKDNIYNKDDIYKADNIDNKDDIYKADNIYNKDDIYKADNIYKADNI
PF07_0049_D2_seq12	PF07_0049_D2	(276, 337)	var	KKKKKVQNLQKQCRGTDASKEPRYCSRNGFDCEKTISRIGKVRMGKGCTDCFFACHRYENWI
PFIT_1414700.1-p1:transcript=PFIT_1414700.1:gene=PFIT_1414700:organism=Plasmodium_falciparum_IT:gene_product=conserved_Plasmodium_protein__unknown_function:transcript_product=conserved_Plasmodium_protein__unknown_function:location=PfIT_14_v3:570665-575931(-):protein_length=1193:sequence_SO=chromosome:SO=protein_coding_seq38	PFIT_1414700.1-p1	(926, 987)	PFIT_1414700.1-p1conserved_Plasmodium_protein__unknown_function	HNIVKKDNKHMEINKCSKNNETHNNLPMSNDQKNNILDKNNKMIDKNLLKKKSSLQMNSFNS
PF3D7_1025200.1-p1:transcript=PF3D7_1025200.1:gene=PF3D7_1025200:organism=Plasmodium_falciparum_3D7:gene_product=ATP_synthase_mitochondrial_F1_complex_assembly_factor_2__putative:transcript_product=ATP_synthase_mitochondrial_F1_complex_assembly_factor_2__putative:location=Pf3D7_10_v3:1055744-1057030(-):protein_length=428:sequence_SO=chromosome:SO=protein_coding_seq5	PF3D7_1025200.1-p1	(101, 162)	PF3D7_1025200.1-p1ATP_synthase_mitochondrial_F1_complex_assembly_factor_2__putative	VNNLIDFVNLKEHNMLPKNYDHKYNNKGDNKYNNKGDNKYNNKGDSEYNKCDSEYNKCDSEY
PF3D7_1025200.1-p1:transcript=PF3D7_1025200.1:gene=PF3D7_1025200:organism=Plasmodium_falciparum_3D7:gene_product=ATP_synthase_mitochondrial_F1_complex_assembly_factor_2__putative:transcript_product=ATP_synthase_mitochondrial_F1_complex_assembly_factor_2__putative:location=Pf3D7_10_v3:1055744-1057030(-):protein_length=428:sequence_SO=chromosome:SO=protein_coding_seq6	PF3D7_1025200.1-p1	(126, 187)	PF3D7_1025200.1-p1ATP_synthase_mitochondrial_F1_complex_assembly_factor_2__putative	NKGDNKYNNKGDNKYNNKGDSEYNKCDSEYNKCDSEYNKCDSEYNKCDSEYNKCDSEYNKCD
PF3D7_0419700.1-p1:transcript=PF3D7_0419700.1:gene=PF3D7_0419700:organism=Plasmodium_falciparum_3D7:gene_product=apical_merozoite_protein:transcript_product=apical_merozoite_protein:location=Pf3D7_04_v3:873138-874115(+):protein_length=325:sequence_SO=chromosome:SO=protein_coding_seq6	PF3D7_0419700.1-p1	(126, 187)	apical_merozoite_protein	IDKKERNEIYENNDLKKYIIKEIQNNKYLNKEKKSSEDIQILEEHSKKLQKEIHEWLESVNN
HB3var27_seq69	HB3var27	(1701, 1762)	var	KTKPEKPAPPAPSKEPGSTPSAGEKPAQDTKDNPPKDKVPAPAPLPPPPLPSDNTSDILKTT
PF3D7_1145000.1-p1:transcript=PF3D7_1145000.1:gene=PF3D7_1145000:organism=Plasmodium_falciparum_3D7:gene_product=conserved_Plasmodium_protein__unknown_function:transcript_product=conserved_Plasmodium_protein__unknown_function:location=Pf3D7_11_v3:1780084-1782398(-):protein_length=577:sequence_SO=chromosome:SO=protein_coding_seq14	PF3D7_1145000.1-p1	(326, 387)	PF3D7_1145000.1-p1conserved_Plasmodium_protein__unknown_function	ILKHSRNMILSKTKNLKFKQMSNIPIVKETRKKEKIYPRDNNINSTTIKIPDKKNKVYDDKQ
PF3D7_1145000.1-p1:transcript=PF3D7_1145000.1:gene=PF3D7_1145000:organism=Plasmodium_falciparum_3D7:gene_product=conserved_Plasmodium_protein__unknown_function:transcript_product=conserved_Plasmodium_protein__unknown_function:location=Pf3D7_11_v3:1780084-1782398(-):protein_length=577:sequence_SO=chromosome:SO=protein_coding_seq15	PF3D7_1145000.1-p1	(351, 412)	PF3D7_1145000.1-p1conserved_Plasmodium_protein__unknown_function	IVKETRKKEKIYPRDNNINSTTIKIPDKKNKVYDDKQEKNIFEQNMNNKQSNNFLEIYSFDE
MAL6P1.314_D4_seq9	MAL6P1.314_D4	(201, 262)	var	EISYNINMSTNTNNDIPKYVSNNVYSGIDLINDTLSGNKHIDIYDEVLKRKENELFGTNHVK
PF3D7_1300100.1-p1:transcript=PF3D7_1300100.1:gene=PF3D7_1300100:organism=Plasmodium_falciparum_3D7:gene_product=erythrocyte_membrane_protein_1__PfEMP1:transcript_product=erythrocyte_membrane_protein_1__PfEMP1:location=Pf3D7_13_v3:21364-28787(+):protein_length=2162:sequence_SO=chromosome:SO=protein_coding_seq70	PF3D7_1300100.1-p1	(1726, 1787)	var	KKTKRLVDLFSVINIPKSDYDIPTKLSPNRYIPYTSGKYRGKRYIYLEGDSGTDSGYTDHYS
PFIT_1034700.1-p1:transcript=PFIT_1034700.1:gene=PFIT_1034700:organism=Plasmodium_falciparum_IT:gene_product=glutamate-rich_protein:transcript_product=glutamate-rich_protein:location=PfIT_10_v3:1332397-1335954(+):protein_length=1185:sequence_SO=chromosome:SO=protein_coding_seq8	PFIT_1034700.1-p1	(176, 237)	glutamate-rich_protein	EPFPNQKHKDLQQDLNDEPLEPFPTQIHKDYKEKNLINEEDSEPFPRQEHKKVDNHNEEKNV
PFIT_1034700.1-p1:transcript=PFIT_1034700.1:gene=PFIT_1034700:organism=Plasmodium_falciparum_IT:gene_product=glutamate-rich_protein:transcript_product=glutamate-rich_protein:location=PfIT_10_v3:1332397-1335954(+):protein_length=1185:sequence_SO=chromosome:SO=protein_coding_seq9	PFIT_1034700.1-p1	(201, 262)	glutamate-rich_protein	QIHKDYKEKNLINEEDSEPFPRQEHKKVDNHNEEKNVFHENGSANGNQGSLKLKSFDEHLKD
PFIT_1034700.1-p1:transcript=PFIT_1034700.1:gene=PFIT_1034700:organism=Plasmodium_falciparum_IT:gene_product=glutamate-rich_protein:transcript_product=glutamate-rich_protein:location=PfIT_10_v3:1332397-1335954(+):protein_length=1185:sequence_SO=chromosome:SO=protein_coding_seq3	PFIT_1034700.1-p1	(51, 112)	glutamate-rich_protein	PSNNKGKIIRGSNDELNKNSEDVLEQSEKSLVSENVPSGLDIDDIPKESIFIQEDQEGQTHS
PFIT_1034700.1-p1:transcript=PFIT_1034700.1:gene=PFIT_1034700:organism=Plasmodium_falciparum_IT:gene_product=glutamate-rich_protein:transcript_product=glutamate-rich_protein:location=PfIT_10_v3:1332397-1335954(+):protein_length=1185:sequence_SO=chromosome:SO=protein_coding_seq6	PFIT_1034700.1-p1	(126, 187)	glutamate-rich_protein	NNNDSKNESSDIISENNKSNKVQNHFESLSDLELLENSSQDNLDKDTISTEPFPNQKHKDLQ
PFIT_1034700.1-p1:transcript=PFIT_1034700.1:gene=PFIT_1034700:organism=Plasmodium_falciparum_IT:gene_product=glutamate-rich_protein:transcript_product=glutamate-rich_protein:location=PfIT_10_v3:1332397-1335954(+):protein_length=1185:sequence_SO=chromosome:SO=protein_coding_seq5	PFIT_1034700.1-p1	(101, 162)	glutamate-rich_protein	FIQEDQEGQTHSELNPETSEHSKDLNNNDSKNESSDIISENNKSNKVQNHFESLSDLELLEN
PFIT_0101600.1-p1:transcript=PFIT_0101600.1:gene=PFIT_0101600:organism=Plasmodium_falciparum_IT:gene_product=vacuolar_protein_sorting-associated_protein_51__putative:transcript_product=vacuolar_protein_sorting-associated_protein_51__putative:location=PfIT_01_v3:76613-81616(-):protein_length=1667:sequence_SO=chromosome:SO=protein_coding_seq3	PFIT_0101600.1-p1	(51, 112)	PFIT_0101600.1-p1vacuolar_protein_sorting-associated_protein_51__putative	NNSVDDNNFFDKDENIKEKSTILKSSDNNSINLRIDENYKNIENDIKECNEENVMDKMNYID
PF3D7_1415600.1-p1:transcript=PF3D7_1415600.1:gene=PF3D7_1415600:organism=Plasmodium_falciparum_3D7:gene_product=conserved_Plasmodium_protein__unknown_function:transcript_product=conserved_Plasmodium_protein__unknown_function:location=Pf3D7_14_v3:629419-632895(-):protein_length=1158:sequence_SO=chromosome:SO=protein_coding_seq19	PF3D7_1415600.1-p1	(451, 512)	PF3D7_1415600.1-p1conserved_Plasmodium_protein__unknown_function	MHNSYIYNNRDSFRNKEDKEQNDNNYQEEAPFDFFIKKYPSMSKKNNIKRNDINVENIYKGV
PF07_0139_D7_seq6	PF07_0139_D7	(126, 187)	var	SGNNTTASGNNTTASGNNTTASDTQNDIQNDGIPSSKITDNEWNTLKDEFISQYLPNTEPNN
PF3D7_1350500.1-p1:transcript=PF3D7_1350500.1:gene=PF3D7_1350500:organism=Plasmodium_falciparum_3D7:gene_product=conserved_Plasmodium_protein__unknown_function:transcript_product=conserved_Plasmodium_protein__unknown_function:location=Pf3D7_13_v3:2015367-2018801(-):protein_length=1144:sequence_SO=chromosome:SO=protein_coding_seq27	PF3D7_1350500.1-p1	(651, 712)	PF3D7_1350500.1-p1conserved_Plasmodium_protein__unknown_function	ILNSDENFNPENDLYSNKEITIYKVNNNEVSKSSKNNRRYKSEPHYRIVYKNNKSSNTTNNY
PF3D7_1350500.1-p1:transcript=PF3D7_1350500.1:gene=PF3D7_1350500:organism=Plasmodium_falciparum_3D7:gene_product=conserved_Plasmodium_protein__unknown_function:transcript_product=conserved_Plasmodium_protein__unknown_function:location=Pf3D7_13_v3:2015367-2018801(-):protein_length=1144:sequence_SO=chromosome:SO=protein_coding_seq29	PF3D7_1350500.1-p1	(701, 762)	PF3D7_1350500.1-p1conserved_Plasmodium_protein__unknown_function	KNNKSSNTTNNYISPHFMNEENMDENNKNVTFSNNDNNNNNGDKKQKSINNFNNVDEKKESY
PF3D7_1100100.1-p1:transcript=PF3D7_1100100.1:gene=PF3D7_1100100:organism=Plasmodium_falciparum_3D7:gene_product=erythrocyte_membrane_protein_1__PfEMP1:transcript_product=erythrocyte_membrane_protein_1__PfEMP1:location=Pf3D7_11_v3:24160-31598(+):protein_length=2182:sequence_SO=chromosome:SO=protein_coding_seq79	PF3D7_1100100.1-p1	(1951, 2012)	var	NGEEYSYNVNMVNSMNDIPMSGKNDVYSGIDLINDSLSGGEPIDIYDEVLKRKENELFGTNH
PF3D7_0731600.1-p1:transcript=PF3D7_0731600.1:gene=PF3D7_0731600:organism=Plasmodium_falciparum_3D7:gene_product=acyl-CoA_synthetase:transcript_product=acyl-CoA_synthetase:location=Pf3D7_07_v3:1368161-1370596(+):protein_length=811:sequence_SO=chromosome:SO=protein_coding_seq9	PF3D7_0731600.1-p1	(201, 262)	PF3D7_0731600.1-p1acyl-CoA_synthetase	PHLKNLIILDTLNKSNKINSKGLEKSDKNKKSKEKDNGLVNVDYDKEKLKKIKDLKVKARSV
PFIT_0501500.1-p1:transcript=PFIT_0501500.1:gene=PFIT_0501500:organism=Plasmodium_falciparum_IT:gene_product=interspersed_repeat_antigen:transcript_product=interspersed_repeat_antigen:location=PfIT_05_v3:84829-89348(+):protein_length=1447:sequence_SO=chromosome:SO=protein_coding_seq35	PFIT_0501500.1-p1	(851, 912)	interspersed_repeat_antigen	GNKNDKKSKNEKKPSLESVKQNADEQKEQPTDSQISVNAQDSVTTQEPITAQETVTDQEPIT
IT4var12_seq12	IT4var12	(276, 337)	var	TCSNGEKPTGEKCQCIDGTVPTNLDYVPQYLRWFEEWAEEFCRKRNLKLQNAIKNCHGMDDD
IT4var12_seq13	IT4var12	(301, 362)	var	YVPQYLRWFEEWAEEFCRKRNLKLQNAIKNCHGMDDDGKEKYCSRNGYDCTKTIRSIDKYSM
PREICHvar77_seq25	PREICHvar77	(601, 662)	var	FLDNLKGEPCKNNKEDEKENGGANINFGEDKTFQHATNCDPCSTFKIKCNGHDCRGSNGISC
PF3D7_0930100.1-p1:transcript=PF3D7_0930100.1:gene=PF3D7_0930100:organism=Plasmodium_falciparum_3D7:gene_product=conserved_Plasmodium_protein__unknown_function:transcript_product=conserved_Plasmodium_protein__unknown_function:location=Pf3D7_09_v3:1191787-1195239(-):protein_length=1150:sequence_SO=chromosome:SO=protein_coding_seq39	PF3D7_0930100.1-p1	(951, 1012)	PF3D7_0930100.1-p1conserved_Plasmodium_protein__unknown_function	QQNEITEKYSKKNDTFTFNYRIEKEEEEVKKLNELILDKQNVEPQNHLQNNISNEEFYSFVN
PF3D7_1313500.1-p1:transcript=PF3D7_1313500.1:gene=PF3D7_1313500:organism=Plasmodium_falciparum_3D7:gene_product=conserved_Plasmodium_membrane_protein__unknown_function:transcript_product=conserved_Plasmodium_membrane_protein__unknown_function:location=Pf3D7_13_v3:573169-578479(-):protein_length=1737:sequence_SO=chromosome:SO=protein_coding_seq8	PF3D7_1313500.1-p1	(176, 237)	PF3D7_1313500.1-p1conserved_Plasmodium_membrane_protein__unknown_function	NNNNNNNSNDSLIKKIYNKKKLYEIYSDTNFLKEIENKQNISYPYFDKKWNYNFSYEKSYKK
PFIT_1001700.1-p1:transcript=PFIT_1001700.1:gene=PFIT_1001700:organism=Plasmodium_falciparum_IT:gene_product=EMP1-trafficking_protein:transcript_product=EMP1-trafficking_protein:location=PfIT_10_v3:46269-48146(-):protein_length=595:sequence_SO=chromosome:SO=protein_coding_seq15	PFIT_1001700.1-p1	(351, 412)	PFIT_1001700.1-p1EMP1-trafficking_protein	YTMNLDSPLLKGSSGGKTSSNKESNESNEPTKKPSKYTMNLDSPLLKGSSGGETSSNKESNE
PFIT_1001700.1-p1:transcript=PFIT_1001700.1:gene=PFIT_1001700:organism=Plasmodium_falciparum_IT:gene_product=EMP1-trafficking_protein:transcript_product=EMP1-trafficking_protein:location=PfIT_10_v3:46269-48146(-):protein_length=595:sequence_SO=chromosome:SO=protein_coding_seq14	PFIT_1001700.1-p1	(326, 387)	PFIT_1001700.1-p1EMP1-trafficking_protein	GSSGGKTSSNKESNDSNGATKKPSKYTMNLDSPLLKGSSGGKTSSNKESNESNEPTKKPSKY
PFIT_1001700.1-p1:transcript=PFIT_1001700.1:gene=PFIT_1001700:organism=Plasmodium_falciparum_IT:gene_product=EMP1-trafficking_protein:transcript_product=EMP1-trafficking_protein:location=PfIT_10_v3:46269-48146(-):protein_length=595:sequence_SO=chromosome:SO=protein_coding_seq13	PFIT_1001700.1-p1	(301, 362)	PFIT_1001700.1-p1EMP1-trafficking_protein	ESNDSNGATKKPSKYTMNLDSPLLKGSSGGKTSSNKESNDSNGATKKPSKYTMNLDSPLLKG
PF08_0141_D5_seq10	PF08_0141_D5	(226, 287)	var	DFSKRPQFLRWMTEWGEEFCKKRKEQLENLKDKCPDYTCSFDTKKQECENHCKVYEEWLKGW
PFA0005w_D6_seq9	PFA0005w_D6	(201, 262)	var	PFITSIHDRDLYTGEQISYNIHMSTNTMDDPKYVSNNVYSGIDLINDALNGDYDIYDEILKR
PFIT_0112200.1-p1:transcript=PFIT_0112200.1:gene=PFIT_0112200:organism=Plasmodium_falciparum_IT:gene_product=DBL_containing_protein__unknown_function:transcript_product=DBL_containing_protein__unknown_function:location=PfIT_01_v3:470015-479243(+):protein_length=2919:sequence_SO=chromosome:SO=protein_coding_seq50	PFIT_0112200.1-p1	(1226, 1287)	PFIT_0112200.1-p1DBL_containing_protein__unknown_function	KIQEFNMKMGEENKHKSCKELGSCNAQNGESCKEACRSYKEWTDKKLKEYNQQLNKYNSDKI
PFIT_0616500.1-p1:transcript=PFIT_0616500.1:gene=PFIT_0616500:organism=Plasmodium_falciparum_IT:gene_product=erythrocyte_membrane_protein_1__PfEMP1:transcript_product=erythrocyte_membrane_protein_1__PfEMP1:location=PfIT_06_v3:663547-672143(-):protein_length=2760:sequence_SO=chromosome:SO=protein_coding_seq12	PFIT_0616500.1-p1	(276, 337)	var	KTSGQCRCIDRSVPTNLDYVPQYLRWFDEWTEDFCRKRKSQLENAIQNCRGKDEYGEEKYCS
PF3D7_1430300.1-p1:transcript=PF3D7_1430300.1:gene=PF3D7_1430300:organism=Plasmodium_falciparum_3D7:gene_product=acid_phosphatase__putative:transcript_product=acid_phosphatase__putative:location=Pf3D7_14_v3:1191946-1199919(-):protein_length=2657:sequence_SO=chromosome:SO=protein_coding_seq70	PF3D7_1430300.1-p1	(1726, 1787)	PF3D7_1430300.1-p1acid_phosphatase__putative	DQMDSTSNVHEKTKELKNSGSLENKENKENKQNKQNKQNKEYTQYTQYTQNKQNKEYNDKHG
PFIT_0522600.1-p1:transcript=PFIT_0522600.1:gene=PFIT_0522600:organism=Plasmodium_falciparum_IT:gene_product=conserved_Plasmodium_protein__unknown_function:transcript_product=conserved_Plasmodium_protein__unknown_function:location=PfIT_05_v3:914432-942895(+):protein_length=9310:sequence_SO=chromosome:SO=protein_coding_seq336	PFIT_0522600.1-p1	(8376, 8437)	PFIT_0522600.1-p1conserved_Plasmodium_protein__unknown_function	PYTYNGYFYILSLPVRPQFEIINATKFIIAYATDINKYTKRYMNSSNYNTYLNRYNKDGDYS
PFIT_1418600.1-p1:transcript=PFIT_1418600.1:gene=PFIT_1418600:organism=Plasmodium_falciparum_IT:gene_product=conserved_Plasmodium_protein__unknown_function:transcript_product=conserved_Plasmodium_protein__unknown_function:location=PfIT_14_v3:759916-773763(-):protein_length=4615:sequence_SO=chromosome:SO=protein_coding_seq55	PFIT_1418600.1-p1	(1351, 1412)	PFIT_1418600.1-p1conserved_Plasmodium_protein__unknown_function	IYENEKDINNCENNILIGKQENIKNYEENKMIETYYDEMLLKKKSINQLRLISEEMLLSKRE
HB3var1csa_seq140	HB3var1csa	(3476, 3537)	var	DRDLYTGKEISYNINMSTNTNNDIPMNARNDSYRGIDLINDSLSGAKPIDIYDEVLKRKENE
PF3D7_1146800.1-p1:transcript=PF3D7_1146800.1:gene=PF3D7_1146800:organism=Plasmodium_falciparum_3D7:gene_product=conserved_Plasmodium_protein__unknown_function:transcript_product=conserved_Plasmodium_protein__unknown_function:location=Pf3D7_11_v3:1843645-1853372(-):protein_length=3188:sequence_SO=chromosome:SO=protein_coding_seq114	PF3D7_1146800.1-p1	(2826, 2887)	PF3D7_1146800.1-p1conserved_Plasmodium_protein__unknown_function	NHKNNSNNKAKGKNMGKGKKQTPNRMNNTKNVQNGKNTKNINNIKNISNMSNIESINSMTSI
RAJ116var22_seq19	RAJ116var22	(451, 512)	var	QSEPQVEQGKASSVKFTEDNVDKTFAHTEYCEPCPWCGLKDKNDGTWERKGEGHKECPQEKE
PF3D7_0213800.1-p1:transcript=PF3D7_0213800.1:gene=PF3D7_0213800:organism=Plasmodium_falciparum_3D7:gene_product=conserved_Plasmodium_protein__unknown_function:transcript_product=conserved_Plasmodium_protein__unknown_function:location=Pf3D7_02_v3:558585-560594(+):protein_length=669:sequence_SO=chromosome:SO=protein_coding_seq2	PF3D7_0213800.1-p1	(26, 87)	PF3D7_0213800.1-p1conserved_Plasmodium_protein__unknown_function	INSNEELIQNSDVERDCNTETCLNKEKYMNKNEECIRIKRKISNDDNMSIFIKGRKYLFIEN
PF3D7_0912400.1-p1:transcript=PF3D7_0912400.1:gene=PF3D7_0912400:organism=Plasmodium_falciparum_3D7:gene_product=alkaline_phosphatase__putative:transcript_product=alkaline_phosphatase__putative:location=Pf3D7_09_v3:551426-553167(-):protein_length=446:sequence_SO=chromosome:SO=protein_coding_seq5	PF3D7_0912400.1-p1	(101, 162)	PF3D7_0912400.1-p1alkaline_phosphatase__putative	DGIYDDHDYNKNNGDRLYKYKKESKKKYLDYLNVDKNDVRYKRNGAYISKLYIDPDNEKNQV
IT4var34_seq14	IT4var34	(326, 387)	var	DYVPQYLRWFEEWAEDFCRKKKKKLENLQKQCRGKYQDADRYCSRNGFDCEKTVNARGKVRM
IT4var34_seq12	IT4var34	(276, 337)	var	TCSDKLANASYFHATCIDLNGSGAQANHYCRCNGDKPGDDKANIDPPTYFDYVPQYLRWFEE
PF3D7_0700800.1-p1:transcript=PF3D7_0700800.1:gene=PF3D7_0700800:organism=Plasmodium_falciparum_3D7:gene_product=Pfmc-2TM_Maurer's_cleft_two_transmembrane_protein:transcript_product=Pfmc-2TM_Maurer's_cleft_two_transmembrane_protein:location=Pf3D7_07_v3:48300-49106(+):protein_length=231:sequence_SO=chromosome:SO=protein_coding_seq4	PF3D7_0700800.1-p1	(76, 137)	Pfmc-2TM	NPDAEISDLVNLVDNMNITQEKKDEIKNLTLKYMNSDDIKEKNESINELKKYSNNEECKEHM
PF3D7_0402100.1-p1:transcript=PF3D7_0402100.1:gene=PF3D7_0402100:organism=Plasmodium_falciparum_3D7:gene_product=Plasmodium_exported_protein_(PHISTb)__unknown_function:transcript_product=Plasmodium_exported_protein_(PHISTb)__unknown_function:location=Pf3D7_04_v3:123588-125464(-):protein_length=575:sequence_SO=chromosome:SO=protein_coding_seq15	PF3D7_0402100.1-p1	(351, 412)	PF3D7_0402100.1-p1Plasmodium_exported_protein_(PHISTb)__unknown_function	DEEDIEEDNMNYMDSIHDLEYEKEEYNDKYEKKMNTIYHKSGLEKAENYLNFLQMNLLNLKK
PF3D7_0402100.1-p1:transcript=PF3D7_0402100.1:gene=PF3D7_0402100:organism=Plasmodium_falciparum_3D7:gene_product=Plasmodium_exported_protein_(PHISTb)__unknown_function:transcript_product=Plasmodium_exported_protein_(PHISTb)__unknown_function:location=Pf3D7_04_v3:123588-125464(-):protein_length=575:sequence_SO=chromosome:SO=protein_coding_seq14	PF3D7_0402100.1-p1	(326, 387)	PF3D7_0402100.1-p1Plasmodium_exported_protein_(PHISTb)__unknown_function	SDDLHEEMEYHHFKENDKYDEEDEEDEEDIEEDNMNYMDSIHDLEYEKEEYNDKYEKKMNTI
PFIT_0936500.1-p1:transcript=PFIT_0936500.1:gene=PFIT_0936500:organism=Plasmodium_falciparum_IT:gene_product=ring-exported_protein_1:transcript_product=ring-exported_protein_1:location=PfIT_09_v3:1379403-1381418(-):protein_length=610:sequence_SO=chromosome:SO=protein_coding_seq22	PFIT_0936500.1-p1	(526, 587)	ring-exported_protein_1	TETNNTWKKDSWKKKTEEQQNAEAQQEVKSPYEKYSYNKETKPQNDKYTLNKEVKPQNEKYT
PFIT_0535100.1-p1:transcript=PFIT_0535100.1:gene=PFIT_0535100:organism=Plasmodium_falciparum_IT:gene_product=formin_1:transcript_product=formin_1:location=PfIT_05_v3:1451885-1460080(-):protein_length=2731:sequence_SO=chromosome:SO=protein_coding_seq37	PFIT_0535100.1-p1	(901, 962)	formin_1	TNITSKDNSLSKKITILKGKELTKNKSTNIAKDQDITLKIQNKTDNKMDNKINNKMDNKINN
PF13_0001_D6_seq5	PF13_0001_D6	(101, 162)	var	YVPGSPKYKTLIEVVLEPSGNNTTASGKNTPSDTQNDIQSDDIPSSKITDNEWNTLKDDFIY
IGHvar07_seq77	IGHvar07	(1901, 1962)	var	YRDICVDNVPSGIDTVSASGDNPTNKVTMKEISDKIKEMLKKQSGEQPPPDKNPGQTPQEWW
IGHvar07_seq76	IGHvar07	(1876, 1937)	var	DPQIKLNGGDIPDDFLRQMFYTLGDYRDICVDNVPSGIDTVSASGDNPTNKVTMKEISDKIK
IGHvar07_seq75	IGHvar07	(1851, 1912)	var	QEKKKPQNGLVGGVSLHSQEGSPEDDPQIKLNGGDIPDDFLRQMFYTLGDYRDICVDNVPSG
PFIT_bin09600.1-p1:transcript=PFIT_bin09600.1:gene=PFIT_bin09600:organism=Plasmodium_falciparum_IT:gene_product=B_ITvar19_-_erythrocyte_membrane_protein_1__PfEMP1__putative:transcript_product=B_ITvar19_-_erythrocyte_membrane_protein_1__PfEMP1__putative:location=PfIT_bin_v3_archived_contig_27:17-4166(+):protein_length=1177:sequence_SO=random_sequence:SO=protein_coding_seq41	PFIT_bin09600.1-p1	(1001, 1062)	var	KCNCVLHECSGLSVTDSGIPDGSAFGGGLPPGKCKGLEGGPQKKIEPPTSDYINDILKSTIP
PFIT_0322800.1-p1:transcript=PFIT_0322800.1:gene=PFIT_0322800:organism=Plasmodium_falciparum_IT:gene_product=conserved_Plasmodium_protein__unknown_function:transcript_product=conserved_Plasmodium_protein__unknown_function:location=PfIT_03_v3:894916-904008(-):protein_length=2991:sequence_SO=chromosome:SO=protein_coding_seq83	PFIT_0322800.1-p1	(2051, 2112)	PFIT_0322800.1-p1conserved_Plasmodium_protein__unknown_function	YDDDMLYKQNNNFFMYIFSKIKNVYLFVDEINKMVYSIMHRDLNIYNTIIYSFNMQNIHDTN
PFIT_1004200.1-p1:transcript=PFIT_1004200.1:gene=PFIT_1004200:organism=Plasmodium_falciparum_IT:gene_product=conserved_Plasmodium_membrane_protein__unknown_function:transcript_product=conserved_Plasmodium_membrane_protein__unknown_function:location=PfIT_10_v3:153906-157894(+):protein_length=1093:sequence_SO=chromosome:SO=protein_coding_seq27	PFIT_1004200.1-p1	(651, 712)	PFIT_1004200.1-p1conserved_Plasmodium_membrane_protein__unknown_function	SYNVKENNVKEEFQIDNNQSNKKTNNIKEKYCDINNYYYNYTFKKNYNDTTNIQELQQKSNT
PFIT_1004200.1-p1:transcript=PFIT_1004200.1:gene=PFIT_1004200:organism=Plasmodium_falciparum_IT:gene_product=conserved_Plasmodium_membrane_protein__unknown_function:transcript_product=conserved_Plasmodium_membrane_protein__unknown_function:location=PfIT_10_v3:153906-157894(+):protein_length=1093:sequence_SO=chromosome:SO=protein_coding_seq26	PFIT_1004200.1-p1	(626, 687)	PFIT_1004200.1-p1conserved_Plasmodium_membrane_protein__unknown_function	GHEKDDNISANKKNKKYITLSKHGLSYNVKENNVKEEFQIDNNQSNKKTNNIKEKYCDINNY
PFIT_1004200.1-p1:transcript=PFIT_1004200.1:gene=PFIT_1004200:organism=Plasmodium_falciparum_IT:gene_product=conserved_Plasmodium_membrane_protein__unknown_function:transcript_product=conserved_Plasmodium_membrane_protein__unknown_function:location=PfIT_10_v3:153906-157894(+):protein_length=1093:sequence_SO=chromosome:SO=protein_coding_seq28	PFIT_1004200.1-p1	(676, 737)	PFIT_1004200.1-p1conserved_Plasmodium_membrane_protein__unknown_function	NIKEKYCDINNYYYNYTFKKNYNDTTNIQELQQKSNTKDIFPNITKCKNKKKKEDHIIYSDD
PFIT_0321800.1-p1:transcript=PFIT_0321800.1:gene=PFIT_0321800:organism=Plasmodium_falciparum_IT:gene_product=microtubule_and_actin_binding_protein__putative:transcript_product=microtubule_and_actin_binding_protein__putative:location=PfIT_03_v3:846333-852504(-):protein_length=1892:sequence_SO=chromosome:SO=protein_coding_seq26	PFIT_0321800.1-p1	(626, 687)	PFIT_0321800.1-p1microtubule_and_actin_binding_protein__putative	ELAISSNNSSKNSEQVRKKKLLKENMNNLNNVNKNEETNMIYNNKETIMDNENVYINTYNNN
PFIT_0321800.1-p1:transcript=PFIT_0321800.1:gene=PFIT_0321800:organism=Plasmodium_falciparum_IT:gene_product=microtubule_and_actin_binding_protein__putative:transcript_product=microtubule_and_actin_binding_protein__putative:location=PfIT_03_v3:846333-852504(-):protein_length=1892:sequence_SO=chromosome:SO=protein_coding_seq25	PFIT_0321800.1-p1	(601, 662)	PFIT_0321800.1-p1microtubule_and_actin_binding_protein__putative	EKIKQSNSCNEEQNKVKGHFNNIKEELAISSNNSSKNSEQVRKKKLLKENMNNLNNVNKNEE
PF07_0050__D6_seq7	PF07_0050__D6	(151, 212)	var	DNEWNTLKDDFISQYLQSEQPKDVPNDYSSGDIPFNTQPNTLYFDKPEEKPFIMSIHDRDLY
PF07_0050__D6_seq6	PF07_0050__D6	(126, 187)	var	ASGKNTPSDTQNDIQNDGIPSSKITDNEWNTLKDDFISQYLQSEQPKDVPNDYSSGDIPFNT
PF07_0050__D6_seq5	PF07_0050__D6	(101, 162)	var	IYVPGSPKYKTLIEVVLEPSGNNTTASGKNTPSDTQNDIQNDGIPSSKITDNEWNTLKDDFI
HB3var18_seq30	HB3var18	(726, 787)	var	VLEGVLEKDVLLTSLREAYGKPEDIKHIKQLLDEEETAAAGETDNKNNTTIDKLLNHELTDA
PF3D7_0930300.1-p1:transcript=PF3D7_0930300.1:gene=PF3D7_0930300:organism=Plasmodium_falciparum_3D7:gene_product=merozoite_surface_protein_1:transcript_product=merozoite_surface_protein_1:location=Pf3D7_09_v3:1201812-1206974(+):protein_length=1720:sequence_SO=chromosome:SO=protein_coding_seq51	PF3D7_0930300.1-p1	(1251, 1312)	merozoite_surface_protein_1	PQPDVTPSPLSVRVSGSSGSTKEETQIPTSGSLLTELQQVVQLQNYDEEDDSLVVLPIFGES
PF3D7_0930300.1-p1:transcript=PF3D7_0930300.1:gene=PF3D7_0930300:organism=Plasmodium_falciparum_3D7:gene_product=merozoite_surface_protein_1:transcript_product=merozoite_surface_protein_1:location=Pf3D7_09_v3:1201812-1206974(+):protein_length=1720:sequence_SO=chromosome:SO=protein_coding_seq50	PF3D7_0930300.1-p1	(1226, 1287)	merozoite_surface_protein_1	KKVNEALKSYENFLPEAKVTTVVTPPQPDVTPSPLSVRVSGSSGSTKEETQIPTSGSLLTEL
PFIT_1124000.1-p1:transcript=PFIT_1124000.1:gene=PFIT_1124000:organism=Plasmodium_falciparum_IT:gene_product=calcium-dependent_protein_kinase_7:transcript_product=calcium-dependent_protein_kinase_7:location=PfIT_11_v3:841861-848735(+):protein_length=2237:sequence_SO=chromosome:SO=protein_coding_seq39	PFIT_1124000.1-p1	(951, 1012)	calcium-dependent_protein_kinase_7	NQNENQNENQNENQNENQNENQNENQNENQNENQNENQNENQNENQNENQKNNNNILKEKNS
PFIT_1124000.1-p1:transcript=PFIT_1124000.1:gene=PFIT_1124000:organism=Plasmodium_falciparum_IT:gene_product=calcium-dependent_protein_kinase_7:transcript_product=calcium-dependent_protein_kinase_7:location=PfIT_11_v3:841861-848735(+):protein_length=2237:sequence_SO=chromosome:SO=protein_coding_seq32	PFIT_1124000.1-p1	(776, 837)	calcium-dependent_protein_kinase_7	CVNFLNTKNIEQDIKEDDEEEKEKEEKKNGADKKDTIEKEEEEYITNNFSKDKNDTSINKKK
PFIT_1124000.1-p1:transcript=PFIT_1124000.1:gene=PFIT_1124000:organism=Plasmodium_falciparum_IT:gene_product=calcium-dependent_protein_kinase_7:transcript_product=calcium-dependent_protein_kinase_7:location=PfIT_11_v3:841861-848735(+):protein_length=2237:sequence_SO=chromosome:SO=protein_coding_seq33	PFIT_1124000.1-p1	(801, 862)	calcium-dependent_protein_kinase_7	EKKNGADKKDTIEKEEEEYITNNFSKDKNDTSINKKKTKNENNAKLVSFVSDIKTGEENIVD
PFIT_bin02300.1-p1:transcript=PFIT_bin02300.1:gene=PFIT_bin02300:organism=Plasmodium_falciparum_IT:gene_product=rifin:transcript_product=rifin:location=PfIT_bin_v3_archived_contig_6:21917-22915(-):protein_length=332:sequence_SO=random_sequence:SO=protein_coding_seq3	PFIT_bin02300.1-p1	(51, 112)	rifin	TSERFHEYDERMKTTRQKCKEQCNKEIQKIILKDKLEKELAEKFVTLQTDIQNDAIPTCVCE
PFIT_bin02300.1-p1:transcript=PFIT_bin02300.1:gene=PFIT_bin02300:organism=Plasmodium_falciparum_IT:gene_product=rifin:transcript_product=rifin:location=PfIT_bin_v3_archived_contig_6:21917-22915(-):protein_length=332:sequence_SO=random_sequence:SO=protein_coding_seq2	PFIT_bin02300.1-p1	(26, 87)	rifin	CELYSPANYDDDPQMKKVMKNFNRQTSERFHEYDERMKTTRQKCKEQCNKEIQKIILKDKLE
PF3D7_1005500.1-p1:transcript=PF3D7_1005500.1:gene=PF3D7_1005500:organism=Plasmodium_falciparum_3D7:gene_product=regulator_of_nonsense_transcripts_1__putative:transcript_product=regulator_of_nonsense_transcripts_1__putative:location=Pf3D7_10_v3:237506-242245(-):protein_length=1579:sequence_SO=chromosome:SO=protein_coding_seq20	PF3D7_1005500.1-p1	(476, 537)	PF3D7_1005500.1-p1regulator_of_nonsense_transcripts_1__putative	KKHMNVCCDDNKMKDCQNNNNPNKYVDDENMIDGKDNKKYEKKGKQNDVYKEDEKGSYINNS
PF3D7_0832900.1-p1:transcript=PF3D7_0832900.1:gene=PF3D7_0832900:organism=Plasmodium_falciparum_3D7:gene_product=stevor:transcript_product=stevor:location=Pf3D7_08_v3:1414283-1415293(+):protein_length=304:sequence_SO=chromosome:SO=protein_coding_seq2	PF3D7_0832900.1-p1	(26, 87)	Stevor	NNHYNINLIRNNTQRTIIKSRLLAQAKNRNPHYHNDPELKEIIDKMNEEAIKKYQKTHDPYK
PFIT_1134100.1-p1:transcript=PFIT_1134100.1:gene=PFIT_1134100:organism=Plasmodium_falciparum_IT:gene_product=apical_membrane_antigen_1:transcript_product=apical_membrane_antigen_1:location=PfIT_11_v3:1232019-1233887(+):protein_length=622:sequence_SO=chromosome:SO=protein_coding_seq2	PFIT_1134100.1-p1	(26, 87)	apical_membrane_antigen_1	NYWEHPYQKSDVYHPINEHREHPKEYEYPLHQEHTYQQEDSGEDENTLQHAYPIDHEGAEPA
PF3D7_0832900.1-p1:transcript=PF3D7_0832900.1:gene=PF3D7_0832900:organism=Plasmodium_falciparum_3D7:gene_product=stevor:transcript_product=stevor:location=Pf3D7_08_v3:1414283-1415293(+):protein_length=304:sequence_SO=chromosome:SO=protein_coding_seq4	PF3D7_0832900.1-p1	(76, 137)	Stevor	IKKYQKTHDPYKQLKEVVEKNGAKYTGGNDAEPMSTIEKELLETYEEIFGNESDIMLKSGMN
PFIT_0208800.1-p1:transcript=PFIT_0208800.1:gene=PFIT_0208800:organism=Plasmodium_falciparum_IT:gene_product=conserved_Plasmodium_protein__unknown_function:transcript_product=conserved_Plasmodium_protein__unknown_function:location=PfIT_02_v3:336924-338441(-):protein_length=505:sequence_SO=chromosome:SO=protein_coding_seq4	PFIT_0208800.1-p1	(76, 137)	PFIT_0208800.1-p1conserved_Plasmodium_protein__unknown_function	IKLSGDTHARNVINEKKILSEKKNGFTTKYDSKKSYSSKKSSLLNKLPSSEITLNNSNLKFF
DD2var04_seq129	DD2var04	(3201, 3262)	var	SPDNGEEPPEEVVPGKKRPPAQPKKPKPPSRRRPPREVTHSILPEMVSISAFPLSVGIAFAA
DD2var04_seq128	DD2var04	(3176, 3237)	var	KTGEDADTVPPKEQDEVAEPKETPASPDNGEEPPEEVVPGKKRPPAQPKKPKPPSRRRPPRE
PF3D7_0617600.1-p1:transcript=PF3D7_0617600.1:gene=PF3D7_0617600:organism=Plasmodium_falciparum_3D7:gene_product=stevor:transcript_product=stevor:location=Pf3D7_06_v3:738259-739265(-):protein_length=302:sequence_SO=chromosome:SO=protein_coding_seq5	PF3D7_0617600.1-p1	(101, 162)	Stevor	KPVGEHGTEPMSTIEKELLETYEKMFGDKKDIMLKSGMPPNDDDRSDKSITCECTDINNPDL
PFIT_1445300.1-p1:transcript=PFIT_1445300.1:gene=PFIT_1445300:organism=Plasmodium_falciparum_IT:gene_product=conserved_Plasmodium_protein__unknown_function:transcript_product=conserved_Plasmodium_protein__unknown_function:location=PfIT_14_v3:1827097-1850225(-):protein_length=7175:sequence_SO=chromosome:SO=protein_coding_seq43	PFIT_1445300.1-p1	(1051, 1112)	PFIT_1445300.1-p1conserved_Plasmodium_protein__unknown_function	EKRYKKDINKKKKYINDKINENVNDKIDENVNDKINENVNDKIDENVNDKINENVNDKINEN
PF3D7_0500800.1-p1:transcript=PF3D7_0500800.1:gene=PF3D7_0500800:organism=Plasmodium_falciparum_3D7:gene_product=mature_parasite-infected_erythrocyte_surface_antigen:transcript_product=mature_parasite-infected_erythrocyte_surface_antigen:location=Pf3D7_05_v3:43327-47761(-):protein_length=1434:sequence_SO=chromosome:SO=protein_coding_seq28	PF3D7_0500800.1-p1	(676, 737)	mature_parasite-infected_erythrocyte_surface_antigen	NDTESKDKLIGQEIITEEVKEGIKENDTENKDKVIGQEIITEEVKEGIKENDTENKDKVIGQ
PF3D7_0500800.1-p1:transcript=PF3D7_0500800.1:gene=PF3D7_0500800:organism=Plasmodium_falciparum_3D7:gene_product=mature_parasite-infected_erythrocyte_surface_antigen:transcript_product=mature_parasite-infected_erythrocyte_surface_antigen:location=Pf3D7_05_v3:43327-47761(-):protein_length=1434:sequence_SO=chromosome:SO=protein_coding_seq29	PF3D7_0500800.1-p1	(701, 762)	mature_parasite-infected_erythrocyte_surface_antigen	NDTENKDKVIGQEIITEEVKEGIKENDTENKDKVIGQEIITEEVKKEIEKQEEKGNKENILE
PF3D7_0500800.1-p1:transcript=PF3D7_0500800.1:gene=PF3D7_0500800:organism=Plasmodium_falciparum_3D7:gene_product=mature_parasite-infected_erythrocyte_surface_antigen:transcript_product=mature_parasite-infected_erythrocyte_surface_antigen:location=Pf3D7_05_v3:43327-47761(-):protein_length=1434:sequence_SO=chromosome:SO=protein_coding_seq24	PF3D7_0500800.1-p1	(576, 637)	mature_parasite-infected_erythrocyte_surface_antigen	ENDTEGNDKVKGPEIIIEEVKEEIKKQVEDGIKENDTEGNDKVKGPEIITEEVKEEIKKQVE
PF3D7_0500800.1-p1:transcript=PF3D7_0500800.1:gene=PF3D7_0500800:organism=Plasmodium_falciparum_3D7:gene_product=mature_parasite-infected_erythrocyte_surface_antigen:transcript_product=mature_parasite-infected_erythrocyte_surface_antigen:location=Pf3D7_05_v3:43327-47761(-):protein_length=1434:sequence_SO=chromosome:SO=protein_coding_seq25	PF3D7_0500800.1-p1	(601, 662)	mature_parasite-infected_erythrocyte_surface_antigen	KQVEDGIKENDTEGNDKVKGPEIITEEVKEEIKKQVEEGIKENDTEGNDKVKGPEIITEEVK
PF3D7_0500800.1-p1:transcript=PF3D7_0500800.1:gene=PF3D7_0500800:organism=Plasmodium_falciparum_3D7:gene_product=mature_parasite-infected_erythrocyte_surface_antigen:transcript_product=mature_parasite-infected_erythrocyte_surface_antigen:location=Pf3D7_05_v3:43327-47761(-):protein_length=1434:sequence_SO=chromosome:SO=protein_coding_seq26	PF3D7_0500800.1-p1	(626, 687)	mature_parasite-infected_erythrocyte_surface_antigen	EEVKEEIKKQVEEGIKENDTEGNDKVKGPEIITEEVKEEIKKQVEEGIKENDTESKDKLIGQ
PF3D7_0500800.1-p1:transcript=PF3D7_0500800.1:gene=PF3D7_0500800:organism=Plasmodium_falciparum_3D7:gene_product=mature_parasite-infected_erythrocyte_surface_antigen:transcript_product=mature_parasite-infected_erythrocyte_surface_antigen:location=Pf3D7_05_v3:43327-47761(-):protein_length=1434:sequence_SO=chromosome:SO=protein_coding_seq27	PF3D7_0500800.1-p1	(651, 712)	mature_parasite-infected_erythrocyte_surface_antigen	VKGPEIITEEVKEEIKKQVEEGIKENDTESKDKLIGQEIITEEVKEGIKENDTENKDKVIGQ
PF3D7_0500800.1-p1:transcript=PF3D7_0500800.1:gene=PF3D7_0500800:organism=Plasmodium_falciparum_3D7:gene_product=mature_parasite-infected_erythrocyte_surface_antigen:transcript_product=mature_parasite-infected_erythrocyte_surface_antigen:location=Pf3D7_05_v3:43327-47761(-):protein_length=1434:sequence_SO=chromosome:SO=protein_coding_seq20	PF3D7_0500800.1-p1	(476, 537)	mature_parasite-infected_erythrocyte_surface_antigen	NDNEKKDKLLGEGDKEDVKEKNDEQKDKVLGEGDKEDVKEKNDEQKDKVLGEGDKEDVKEKN
PF3D7_0500800.1-p1:transcript=PF3D7_0500800.1:gene=PF3D7_0500800:organism=Plasmodium_falciparum_3D7:gene_product=mature_parasite-infected_erythrocyte_surface_antigen:transcript_product=mature_parasite-infected_erythrocyte_surface_antigen:location=Pf3D7_05_v3:43327-47761(-):protein_length=1434:sequence_SO=chromosome:SO=protein_coding_seq21	PF3D7_0500800.1-p1	(501, 562)	mature_parasite-infected_erythrocyte_surface_antigen	KDKVLGEGDKEDVKEKNDEQKDKVLGEGDKEDVKEKNDGKKDKVIGSEKTQKEIKEKVEKRV
PF3D7_0500800.1-p1:transcript=PF3D7_0500800.1:gene=PF3D7_0500800:organism=Plasmodium_falciparum_3D7:gene_product=mature_parasite-infected_erythrocyte_surface_antigen:transcript_product=mature_parasite-infected_erythrocyte_surface_antigen:location=Pf3D7_05_v3:43327-47761(-):protein_length=1434:sequence_SO=chromosome:SO=protein_coding_seq23	PF3D7_0500800.1-p1	(551, 612)	mature_parasite-infected_erythrocyte_surface_antigen	QKEIKEKVEKRVKKKCKKKVKKGIKENDTEGNDKVKGPEIIIEEVKEEIKKQVEDGIKENDT
PFIT_1138700.1-p1:transcript=PFIT_1138700.1:gene=PFIT_1138700:organism=Plasmodium_falciparum_IT:gene_product=conserved_Plasmodium_protein__unknown_function:transcript_product=conserved_Plasmodium_protein__unknown_function:location=PfIT_11_v3:1425645-1434203(+):protein_length=2852:sequence_SO=chromosome:SO=protein_coding_seq41	PFIT_1138700.1-p1	(1001, 1062)	PFIT_1138700.1-p1conserved_Plasmodium_protein__unknown_function	KYMDVYNLIDENRNILSKLNDEENMKSNEYKNKKNRSMVTVETFASLKSFEREMNLLKSHNE
PFIT_1138700.1-p1:transcript=PFIT_1138700.1:gene=PFIT_1138700:organism=Plasmodium_falciparum_IT:gene_product=conserved_Plasmodium_protein__unknown_function:transcript_product=conserved_Plasmodium_protein__unknown_function:location=PfIT_11_v3:1425645-1434203(+):protein_length=2852:sequence_SO=chromosome:SO=protein_coding_seq40	PFIT_1138700.1-p1	(976, 1037)	PFIT_1138700.1-p1conserved_Plasmodium_protein__unknown_function	SNNNYNDDEQTAILMLQDKNEYSKEKYMDVYNLIDENRNILSKLNDEENMKSNEYKNKKNRS
PFIT_1036100.1-p1:transcript=PFIT_1036100.1:gene=PFIT_1036100:organism=Plasmodium_falciparum_IT:gene_product=conserved_Plasmodium_protein__unknown_function:transcript_product=conserved_Plasmodium_protein__unknown_function:location=PfIT_10_v3:1383251-1388666(-):protein_length=1685:sequence_SO=chromosome:SO=protein_coding_seq10	PFIT_1036100.1-p1	(226, 287)	PFIT_1036100.1-p1conserved_Plasmodium_protein__unknown_function	NIKNVSAVEKHQGEHNVNDNVTSQKSKKKKGTSTHNDIKNSTNENANNDLLKYAIQQKDGKH
PF3D7_0302100.1-p1:transcript=PF3D7_0302100.1:gene=PF3D7_0302100:organism=Plasmodium_falciparum_3D7:gene_product=serine/threonine_protein_kinase:transcript_product=serine/threonine_protein_kinase:location=Pf3D7_03_v3:114070-118086(+):protein_length=1338:sequence_SO=chromosome:SO=protein_coding_seq36	PF3D7_0302100.1-p1	(876, 937)	serine/threonine_protein_kinase	MKNNSNSNNFIYDGHNSSKNKNSSNKKKIDVNYKIGNNGNNAYNDNYYNKNYKNNKNNKNFN
PF3D7_0302100.1-p1:transcript=PF3D7_0302100.1:gene=PF3D7_0302100:organism=Plasmodium_falciparum_3D7:gene_product=serine/threonine_protein_kinase:transcript_product=serine/threonine_protein_kinase:location=Pf3D7_03_v3:114070-118086(+):protein_length=1338:sequence_SO=chromosome:SO=protein_coding_seq37	PF3D7_0302100.1-p1	(901, 962)	serine/threonine_protein_kinase	KKKIDVNYKIGNNGNNAYNDNYYNKNYKNNKNNKNFNDDVVEPSPDQYMHANYNNDIVHAVL
PFCLINvar73_seq31	PFCLINvar73	(751, 812)	var	NERGSRSALKGDASKGTYRRQGMPRKLKKVCRIAKDHSNRNHKDSRGRHLCTSNLEYLINSG
PF3D7_0220000.1-p1:transcript=PF3D7_0220000.1:gene=PF3D7_0220000:organism=Plasmodium_falciparum_3D7:gene_product=liver_stage_antigen_3:transcript_product=liver_stage_antigen_3:location=Pf3D7_02_v3:796752-801586(+):protein_length=1558:sequence_SO=chromosome:SO=protein_coding_seq7	PF3D7_0220000.1-p1	(151, 212)	liver_stage_antigen_3	IIDNLLNNIGQNSEKQESVSENVQVSDELFNELLNSVDVNGEVKENILEESQVNDDIFNSLV
DD2var37_seq83	DD2var37	(2051, 2112)	var	HSGNTHPSDSNKTLNTDVSIQIHMDNPKPINEFTNMDTYPNNSSMDTILEDLDKPFNEPYYY
DD2var37_seq82	DD2var37	(2026, 2087)	var	RDMCEQWNNKEELLDKLKEEWENETHSGNTHPSDSNKTLNTDVSIQIHMDNPKPINEFTNMD
PF3D7_1145200.1-p1:transcript=PF3D7_1145200.1:gene=PF3D7_1145200:organism=Plasmodium_falciparum_3D7:gene_product=serine/threonine_protein_kinase__putative:transcript_product=serine/threonine_protein_kinase__putative:location=Pf3D7_11_v3:1789323-1795370(-):protein_length=2015:sequence_SO=chromosome:SO=protein_coding_seq63	PF3D7_1145200.1-p1	(1551, 1612)	PF3D7_1145200.1-p1serine/threonine_protein_kinase__putative	SYKQIDKKVDVEIYRKEKKNSLDISNNIIINNFMNNTYHHKNNSIEKRTDTPMKYYMDTLNY
PF3D7_0321700.1-p1:transcript=PF3D7_0321700.1:gene=PF3D7_0321700:organism=Plasmodium_falciparum_3D7:gene_product=conserved_Plasmodium_protein__unknown_function:transcript_product=conserved_Plasmodium_protein__unknown_function:location=Pf3D7_03_v3:903764-910118(-):protein_length=1946:sequence_SO=chromosome:SO=protein_coding_seq35	PF3D7_0321700.1-p1	(851, 912)	PF3D7_0321700.1-p1conserved_Plasmodium_protein__unknown_function	ITDEGKKSVVDYDKELSTDVDIDVDVDVDVDVDVDVDDESSNQNISNEKKNKEKKIKNNKNK
IGHvar38_seq83	IGHvar38	(2051, 2112)	var	LTSNNHSPYNDKNDLYSGIDLINDALSGNQHIDIYDEMLKRKENELFGTNHVKQTSIHSVAK
PF3D7_1223500.1-p1:transcript=PF3D7_1223500.1:gene=PF3D7_1223500:organism=Plasmodium_falciparum_3D7:gene_product=conserved_Plasmodium_protein__unknown_function:transcript_product=conserved_Plasmodium_protein__unknown_function:location=Pf3D7_12_v3:946864-960969(-):protein_length=4505:sequence_SO=chromosome:SO=protein_coding_seq12	PF3D7_1223500.1-p1	(276, 337)	PF3D7_1223500.1-p1conserved_Plasmodium_protein__unknown_function	QKDTSNYFLNTIDNDISHISQRNEHFLSFNSFDDQKEDDYGNNVITYDHDIQENNNITTHNN
PF3D7_1126700.1-p1:transcript=PF3D7_1126700.1:gene=PF3D7_1126700:organism=Plasmodium_falciparum_3D7:gene_product=autophagy-related_protein_23__putative:transcript_product=autophagy-related_protein_23__putative:location=Pf3D7_11_v3:1040790-1046087(-):protein_length=926:sequence_SO=chromosome:SO=protein_coding_seq25	PF3D7_1126700.1-p1	(601, 662)	PF3D7_1126700.1-p1autophagy-related_protein_23__putative	LNKNLYLEKKKRGVDKLDYNNVVNKLINYIANEKEENCNMIIKTSDQKLKIENEKNTCLVQK
PF3D7_0206900.2-p1:transcript=PF3D7_0206900.2:gene=PF3D7_0206900:organism=Plasmodium_falciparum_3D7:gene_product=merozoite_surface_protein_5:transcript_product=merozoite_surface_protein_5:location=Pf3D7_02_v3:275540-276577(-):protein_length=261:sequence_SO=chromosome:SO=protein_coding_seq5	PF3D7_0206900.2-p1	(101, 162)	merozoite_surface_protein_5	SNPNLDSSENSSESATRSVDISEHNSNNPETKEENGEEPLDLEINENAEIGQEPPNRLHFDN
PF3D7_0206900.2-p1:transcript=PF3D7_0206900.2:gene=PF3D7_0206900:organism=Plasmodium_falciparum_3D7:gene_product=merozoite_surface_protein_5:transcript_product=merozoite_surface_protein_5:location=Pf3D7_02_v3:275540-276577(-):protein_length=261:sequence_SO=chromosome:SO=protein_coding_seq2	PF3D7_0206900.2-p1	(26, 87)	merozoite_surface_protein_5	DEKGEGGFTSKNKENGNNNRNNENELKEEGSLPTKMNEKNSNSSDKQPNDISHDESKSNSNN
PF3D7_0206900.2-p1:transcript=PF3D7_0206900.2:gene=PF3D7_0206900:organism=Plasmodium_falciparum_3D7:gene_product=merozoite_surface_protein_5:transcript_product=merozoite_surface_protein_5:location=Pf3D7_02_v3:275540-276577(-):protein_length=261:sequence_SO=chromosome:SO=protein_coding_seq1	PF3D7_0206900.2-p1	(1, 62)	merozoite_surface_protein_5	MNGHTHILNLNNKNENFLVVRRLMNDEKGEGGFTSKNKENGNNNRNNENELKEEGSLPTKMN
PF3D7_0206900.2-p1:transcript=PF3D7_0206900.2:gene=PF3D7_0206900:organism=Plasmodium_falciparum_3D7:gene_product=merozoite_surface_protein_5:transcript_product=merozoite_surface_protein_5:location=Pf3D7_02_v3:275540-276577(-):protein_length=261:sequence_SO=chromosome:SO=protein_coding_seq8	PF3D7_0206900.2-p1	(176, 237)	merozoite_surface_protein_5	NKVEKNVTDEMLLYNMMSDQNRKSCAINNGGCSDDQICININNIGVKCICKDGYLLGTKCII
AAQ73928_seq119	AAQ73928	(2951, 3012)	var	ENKGEKEFSNMDTIMDDMEDDIYYDVNDDENPFVDDIPMDHNKVDVPKKVHVEMKILNNTSN
AAQ73928_seq114	AAQ73928	(2826, 2887)	var	IPKYVSNNVYSGIDLINDTLGGNKHIDIYDEVLKRKENELFGTKHPKRTPNNSVAKNTNNDP
AAQ73928_seq110	AAQ73928	(2726, 2787)	var	PSKGDGNTLGDDMVPTTNTFTDEEWNELKHGFISQYIQSRLPMDVPQYDVSKELPMNIVGNV
AAQ73928_seq113	AAQ73928	(2801, 2862)	var	IHDRDLYTGEEISYNIHMSTNTNNDIPKYVSNNVYSGIDLINDTLGGNKHIDIYDEVLKRKE
AAQ73928_seq112	AAQ73928	(2776, 2837)	var	SKELPMNIVGNVLDDGINEKPFITSIHDRDLYTGEEISYNIHMSTNTNNDIPKYVSNNVYSG
RAJ116var38_seq39	RAJ116var38	(951, 1012)	var	LCALTNGVKENDEKKKILEAYSYEELNKKTNSITPLEDFANKPQFLRWMIEWGEEFCKKRKE
HB3var16_seq68	HB3var16	(1676, 1737)	var	TYFFLKKKTKHPVDLFSVIDIPKSDYDIPTKLSPNRYIPYTSDKYRGKRYIYLEGDSGTDSG
PF3D7_0405300.1-p1:transcript=PF3D7_0405300.1:gene=PF3D7_0405300:organism=Plasmodium_falciparum_3D7:gene_product=liver_specific_protein_2__putative:transcript_product=liver_specific_protein_2__putative:location=Pf3D7_04_v3:282403-288297(-):protein_length=1964:sequence_SO=chromosome:SO=protein_coding_seq43	PF3D7_0405300.1-p1	(1051, 1112)	PF3D7_0405300.1-p1liver_specific_protein_2__putative	NNEKKDKFVYEFYTSNKKENIDKEEENNIDDKNIKIEIEPNYEINNNFEEENKNEINVIIDK
PF3D7_0405300.1-p1:transcript=PF3D7_0405300.1:gene=PF3D7_0405300:organism=Plasmodium_falciparum_3D7:gene_product=liver_specific_protein_2__putative:transcript_product=liver_specific_protein_2__putative:location=Pf3D7_04_v3:282403-288297(-):protein_length=1964:sequence_SO=chromosome:SO=protein_coding_seq42	PF3D7_0405300.1-p1	(1026, 1087)	PF3D7_0405300.1-p1liver_specific_protein_2__putative	RDKEIHKDDRIKGITSREKNAEEINNNEKKDKFVYEFYTSNKKENIDKEEENNIDDKNIKIE
PF3D7_0935600.1-p1:transcript=PF3D7_0935600.1:gene=PF3D7_0935600:organism=Plasmodium_falciparum_3D7:gene_product=gametocytogenesis-implicated_protein:transcript_product=gametocytogenesis-implicated_protein:location=Pf3D7_09_v3:1405192-1407022(+):protein_length=512:sequence_SO=chromosome:SO=protein_coding_seq11	PF3D7_0935600.1-p1	(251, 312)	gametocytogenesis-implicated_protein	MEEIVDDGMEEIDLNENSDFIHDGNPLGEYSNMEYELLNEVSASTDFSDYHSVVDEDLINFN
PF3D7_0935600.1-p1:transcript=PF3D7_0935600.1:gene=PF3D7_0935600:organism=Plasmodium_falciparum_3D7:gene_product=gametocytogenesis-implicated_protein:transcript_product=gametocytogenesis-implicated_protein:location=Pf3D7_09_v3:1405192-1407022(+):protein_length=512:sequence_SO=chromosome:SO=protein_coding_seq12	PF3D7_0935600.1-p1	(276, 337)	gametocytogenesis-implicated_protein	PLGEYSNMEYELLNEVSASTDFSDYHSVVDEDLINFNDDVTLETQSMIAHGGSLSEIEETGD
PFIT_1418600.1-p1:transcript=PFIT_1418600.1:gene=PFIT_1418600:organism=Plasmodium_falciparum_IT:gene_product=conserved_Plasmodium_protein__unknown_function:transcript_product=conserved_Plasmodium_protein__unknown_function:location=PfIT_14_v3:759916-773763(-):protein_length=4615:sequence_SO=chromosome:SO=protein_coding_seq176	PFIT_1418600.1-p1	(4376, 4437)	PFIT_1418600.1-p1conserved_Plasmodium_protein__unknown_function	QQINQQQINQQQINQQQINQQQINQQQINQQQINQQQINQQQINQQSMSKYPYQAQEIKKHM
PFIT_1418600.1-p1:transcript=PFIT_1418600.1:gene=PFIT_1418600:organism=Plasmodium_falciparum_IT:gene_product=conserved_Plasmodium_protein__unknown_function:transcript_product=conserved_Plasmodium_protein__unknown_function:location=PfIT_14_v3:759916-773763(-):protein_length=4615:sequence_SO=chromosome:SO=protein_coding_seq174	PFIT_1418600.1-p1	(4326, 4387)	PFIT_1418600.1-p1conserved_Plasmodium_protein__unknown_function	KQQLQQQMNHQQINKHQMNQQQMNKQQMNQQQINQQQMNQQQINQQQINQQQINQQQINQQQ
PF3D7_1417600.1-p1:transcript=PF3D7_1417600.1:gene=PF3D7_1417600:organism=Plasmodium_falciparum_3D7:gene_product=conserved_Plasmodium_protein__unknown_function:transcript_product=conserved_Plasmodium_protein__unknown_function:location=Pf3D7_14_v3:730694-744682(-):protein_length=4662:sequence_SO=chromosome:SO=protein_coding_seq178	PF3D7_1417600.1-p1	(4426, 4487)	PF3D7_1417600.1-p1conserved_Plasmodium_protein__unknown_function	NQQQINQQQINQQQINQQQINQQQINQQQINQQQINQQQINQQSMSKYPYQAQEIKKHMDQL
PF3D7_1417600.1-p1:transcript=PF3D7_1417600.1:gene=PF3D7_1417600:organism=Plasmodium_falciparum_3D7:gene_product=conserved_Plasmodium_protein__unknown_function:transcript_product=conserved_Plasmodium_protein__unknown_function:location=Pf3D7_14_v3:730694-744682(-):protein_length=4662:sequence_SO=chromosome:SO=protein_coding_seq177	PF3D7_1417600.1-p1	(4401, 4462)	PF3D7_1417600.1-p1conserved_Plasmodium_protein__unknown_function	NKQQMNQQQINQQQMNQQQINQQQINQQQINQQQINQQQINQQQINQQQINQQQINQQQINQ
PF3D7_1417600.1-p1:transcript=PF3D7_1417600.1:gene=PF3D7_1417600:organism=Plasmodium_falciparum_3D7:gene_product=conserved_Plasmodium_protein__unknown_function:transcript_product=conserved_Plasmodium_protein__unknown_function:location=Pf3D7_14_v3:730694-744682(-):protein_length=4662:sequence_SO=chromosome:SO=protein_coding_seq176	PF3D7_1417600.1-p1	(4376, 4437)	PF3D7_1417600.1-p1conserved_Plasmodium_protein__unknown_function	KIKQQLQQQMNHQQINKHQMNQQQMNKQQMNQQQINQQQMNQQQINQQQINQQQINQQQINQ
anomel_Saglin:AMEC009308_AMEC013632:to_be_corrected_annotated_twice:_seq15	anopheles	(351, 412)	anopheles protein	AQRLEVLRVLLNQIGDREKKTFHKYLVQAARQFDICEQFIGRGKVDQAVKKQLEELRGKFAT
PFIT_0534000.1-p1:transcript=PFIT_0534000.1:gene=PFIT_0534000:organism=Plasmodium_falciparum_IT:gene_product=conserved_Plasmodium_protein__unknown_function:transcript_product=conserved_Plasmodium_protein__unknown_function:location=PfIT_05_v3:1408014-1413751(+):protein_length=1871:sequence_SO=chromosome:SO=protein_coding_seq2	PFIT_0534000.1-p1	(26, 87)	PFIT_0534000.1-p1conserved_Plasmodium_protein__unknown_function	GVIEKSVVGNKGNDIIKKKSEMKKNDKDDNKKEKNKNMDNKKEKDIIYDNQNEKNKSCDNQN
PFIT_0534000.1-p1:transcript=PFIT_0534000.1:gene=PFIT_0534000:organism=Plasmodium_falciparum_IT:gene_product=conserved_Plasmodium_protein__unknown_function:transcript_product=conserved_Plasmodium_protein__unknown_function:location=PfIT_05_v3:1408014-1413751(+):protein_length=1871:sequence_SO=chromosome:SO=protein_coding_seq9	PFIT_0534000.1-p1	(201, 262)	PFIT_0534000.1-p1conserved_Plasmodium_protein__unknown_function	AIHNFQKLSDKYEELQQKFKVLKNEEIREGEEKDKKDDTNEQAGQMGKDKDDNQIKHNNNNN
PREICHvar90_seq32	PREICHvar90	(776, 837)	var	GKLSHDELLEQVLNKEVLLTSIKEGYGNEEDIIHIKELFQETGVDGTSGLSAPNGQNTTIDK
PREICHvar90_seq31	PREICHvar90	(751, 812)	var	QKEKEWKNIKKHFNTQDIGQQEEMLGKLSHDELLEQVLNKEVLLTSIKEGYGNEEDIIHIKE
PF3D7_0104200.1-p1:transcript=PF3D7_0104200.1:gene=PF3D7_0104200:organism=Plasmodium_falciparum_3D7:gene_product=StAR-related_lipid_transfer_protein:transcript_product=StAR-related_lipid_transfer_protein:location=Pf3D7_01_v3:182822-184222(-):protein_length=466:sequence_SO=chromosome:SO=protein_coding_seq3	PF3D7_0104200.1-p1	(51, 112)	StAR-related_lipid_transfer_protein	DNVYKNKIKSRILKENKEESLETAAVNENTKDVKDSCNYSTPSSVFNNDKENTASFIKTGES
PF3D7_1451200.1-p1:transcript=PF3D7_1451200.1:gene=PF3D7_1451200:organism=Plasmodium_falciparum_3D7:gene_product=conserved_Plasmodium_protein__unknown_function:transcript_product=conserved_Plasmodium_protein__unknown_function:location=Pf3D7_14_v3:2094340-2099736(-):protein_length=1504:sequence_SO=chromosome:SO=protein_coding_seq4	PF3D7_1451200.1-p1	(76, 137)	PF3D7_1451200.1-p1conserved_Plasmodium_protein__unknown_function	GLEEKENIIVNINKNYVSETTDNISSEFKETEKIIPDINFDKLDKEHNNTKDNIIVNNMKNA
PFIT_1007300.1-p1:transcript=PFIT_1007300.1:gene=PFIT_1007300:organism=Plasmodium_falciparum_IT:gene_product=transcription_factor_with_AP2_domain(s):transcript_product=transcription_factor_with_AP2_domain(s):location=PfIT_10_v3:238699-243567(-):protein_length=1622:sequence_SO=chromosome:SO=protein_coding_seq57	PFIT_1007300.1-p1	(1401, 1462)	PFIT_1007300.1-p1transcription_factor_with_AP2_domain(s)	RGIYGSNESINNNGLMDEGRLNFIHTAGKHVDKNNMQSGSTTVVNVLNNDENYIKSNINYTN
PF3D7_1474500.1-p1:transcript=PF3D7_1474500.1:gene=PF3D7_1474500:organism=Plasmodium_falciparum_3D7:gene_product=splicing_factor_3A_subunit_1__putative:transcript_product=splicing_factor_3A_subunit_1__putative:location=Pf3D7_14_v3:3055715-3057820(-):protein_length=701:sequence_SO=chromosome:SO=protein_coding_seq18	PF3D7_1474500.1-p1	(426, 487)	PF3D7_1474500.1-p1splicing_factor_3A_subunit_1__putative	DDEHHDIYDDEYDELDDKLYEHTYEDNSDDNYEDKLNNSYNKSKAYEESNNVMDKAYKHKNV
PFIT_0522600.1-p1:transcript=PFIT_0522600.1:gene=PFIT_0522600:organism=Plasmodium_falciparum_IT:gene_product=conserved_Plasmodium_protein__unknown_function:transcript_product=conserved_Plasmodium_protein__unknown_function:location=PfIT_05_v3:914432-942895(+):protein_length=9310:sequence_SO=chromosome:SO=protein_coding_seq16	PFIT_0522600.1-p1	(376, 437)	PFIT_0522600.1-p1conserved_Plasmodium_protein__unknown_function	IELHVIFKKHDIKALNELKEDIKYFKNVEMCILRHNKEYSSEHHLNNTPRDEMYVKKSCNCY
PF3D7_1100800.1-p1:transcript=PF3D7_1100800.1:gene=PF3D7_1100800:organism=Plasmodium_falciparum_3D7:gene_product=Pfmc-2TM_Maurer's_cleft_two_transmembrane_protein:transcript_product=Pfmc-2TM_Maurer's_cleft_two_transmembrane_protein:location=Pf3D7_11_v3:59550-60328(+):protein_length=231:sequence_SO=chromosome:SO=protein_coding_seq3	PF3D7_1100800.1-p1	(51, 112)	Pfmc-2TM	NKKSNGNTLTNILLKDKGEKGGKKKNPDDQISDLVNLVDNMNITQEKKNEIKNLTLKYMNSD
PF3D7_1100800.1-p1:transcript=PF3D7_1100800.1:gene=PF3D7_1100800:organism=Plasmodium_falciparum_3D7:gene_product=Pfmc-2TM_Maurer's_cleft_two_transmembrane_protein:transcript_product=Pfmc-2TM_Maurer's_cleft_two_transmembrane_protein:location=Pf3D7_11_v3:59550-60328(+):protein_length=231:sequence_SO=chromosome:SO=protein_coding_seq2	PF3D7_1100800.1-p1	(26, 87)	Pfmc-2TM	VENGTYKSSYHNGGIQFRMLAQNNTNKKSNGNTLTNILLKDKGEKGGKKKNPDDQISDLVNL
PF3D7_1100800.1-p1:transcript=PF3D7_1100800.1:gene=PF3D7_1100800:organism=Plasmodium_falciparum_3D7:gene_product=Pfmc-2TM_Maurer's_cleft_two_transmembrane_protein:transcript_product=Pfmc-2TM_Maurer's_cleft_two_transmembrane_protein:location=Pf3D7_11_v3:59550-60328(+):protein_length=231:sequence_SO=chromosome:SO=protein_coding_seq5	PF3D7_1100800.1-p1	(101, 162)	Pfmc-2TM	IKNLTLKYMNSDDIKEKNKSINELKKYSNNEECKEHMDNYLMYLRMQNDIKCLKRKNFWNNI
PF3D7_1100800.1-p1:transcript=PF3D7_1100800.1:gene=PF3D7_1100800:organism=Plasmodium_falciparum_3D7:gene_product=Pfmc-2TM_Maurer's_cleft_two_transmembrane_protein:transcript_product=Pfmc-2TM_Maurer's_cleft_two_transmembrane_protein:location=Pf3D7_11_v3:59550-60328(+):protein_length=231:sequence_SO=chromosome:SO=protein_coding_seq4	PF3D7_1100800.1-p1	(76, 137)	Pfmc-2TM	NPDDQISDLVNLVDNMNITQEKKNEIKNLTLKYMNSDDIKEKNKSINELKKYSNNEECKEHM
PF3D7_1224700.1-p1:transcript=PF3D7_1224700.1:gene=PF3D7_1224700:organism=Plasmodium_falciparum_3D7:gene_product=conserved_Plasmodium_protein__unknown_function:transcript_product=conserved_Plasmodium_protein__unknown_function:location=Pf3D7_12_v3:1003201-1007586(-):protein_length=1461:sequence_SO=chromosome:SO=protein_coding_seq31	PF3D7_1224700.1-p1	(751, 812)	PF3D7_1224700.1-p1conserved_Plasmodium_protein__unknown_function	ENNFKGESYEQIDSLNWEYSYDSNNLNNSNNHYKEINNKSDSIYNRKRHSGSDIYNKKYFEE
PFIT_1150900.1-p1:transcript=PFIT_1150900.1:gene=PFIT_1150900:organism=Plasmodium_falciparum_IT:gene_product=A_ITvar8_-_erythrocyte_membrane_protein_1__PfEMP1__putative:transcript_product=A_ITvar8_-_erythrocyte_membrane_protein_1__PfEMP1__putative:location=PfIT_11_v3:1950798-1964088(+):protein_length=3638:sequence_SO=chromosome:SO=protein_coding_seq31	PFIT_1150900.1-p1	(751, 812)	var	GSSGKIKSVRQVAKEMQREGSVRHDGDISKLKADAKLGQYSKKDVERTLNTECDISLQHSNR
PFCLINvar65_seq32	PFCLINvar65	(776, 837)	var	EDTEENTENSLDAEEAEELKHLQKILKLENENNLAVVNAGTEQKTLMDKLLNHELNDATKCK
HB3var08_seq72	HB3var08	(1776, 1837)	var	KYKKDKNGGTEAQKQLNEGTIPDDFKRQMFYTFGDYRDICLDTDISAKTENGDITKAKSNID
HB3var08_seq77	HB3var08	(1901, 1962)	var	PTLETFAQRPQFLRWMTEWGEEFCKKRKEQVEKLRSECDGYECNEENMDDKKKTCEDACKAY
PF3D7_1036000.1-p1:transcript=PF3D7_1036000.1:gene=PF3D7_1036000:organism=Plasmodium_falciparum_3D7:gene_product=merozoite_surface_protein:transcript_product=merozoite_surface_protein:location=Pf3D7_10_v3:1427127-1428344(+):protein_length=405:sequence_SO=chromosome:SO=protein_coding_seq8	PF3D7_1036000.1-p1	(176, 237)	merozoite_surface_protein	TGRNVPPPSEPNVDTPDPPTAPAPVKVPEDAKLSSSPRPEGPRANNRNENNQNTDPYNHYFA
PF3D7_1036000.1-p1:transcript=PF3D7_1036000.1:gene=PF3D7_1036000:organism=Plasmodium_falciparum_3D7:gene_product=merozoite_surface_protein:transcript_product=merozoite_surface_protein:location=Pf3D7_10_v3:1427127-1428344(+):protein_length=405:sequence_SO=chromosome:SO=protein_coding_seq9	PF3D7_1036000.1-p1	(201, 262)	merozoite_surface_protein	KVPEDAKLSSSPRPEGPRANNRNENNQNTDPYNHYFAWEIGGGAPTYKPENNKNDNILLEHV
PF3D7_1036000.1-p1:transcript=PF3D7_1036000.1:gene=PF3D7_1036000:organism=Plasmodium_falciparum_3D7:gene_product=merozoite_surface_protein:transcript_product=merozoite_surface_protein:location=Pf3D7_10_v3:1427127-1428344(+):protein_length=405:sequence_SO=chromosome:SO=protein_coding_seq5	PF3D7_1036000.1-p1	(101, 162)	merozoite_surface_protein	SNKFQSIEDNNVYNKGIFVGTGIKLNDSQTTSDNYKNERYQIDDEKLKYGGSFDTIFSGFVN
PF3D7_1036000.1-p1:transcript=PF3D7_1036000.1:gene=PF3D7_1036000:organism=Plasmodium_falciparum_3D7:gene_product=merozoite_surface_protein:transcript_product=merozoite_surface_protein:location=Pf3D7_10_v3:1427127-1428344(+):protein_length=405:sequence_SO=chromosome:SO=protein_coding_seq6	PF3D7_1036000.1-p1	(126, 187)	merozoite_surface_protein	NDSQTTSDNYKNERYQIDDEKLKYGGSFDTIFSGFVNLLTPSSPTQNDGSTGRNVPPPSEPN
PF3D7_1036000.1-p1:transcript=PF3D7_1036000.1:gene=PF3D7_1036000:organism=Plasmodium_falciparum_3D7:gene_product=merozoite_surface_protein:transcript_product=merozoite_surface_protein:location=Pf3D7_10_v3:1427127-1428344(+):protein_length=405:sequence_SO=chromosome:SO=protein_coding_seq7	PF3D7_1036000.1-p1	(151, 212)	merozoite_surface_protein	GSFDTIFSGFVNLLTPSSPTQNDGSTGRNVPPPSEPNVDTPDPPTAPAPVKVPEDAKLSSSP
PF3D7_0935800.1-p1:transcript=PF3D7_0935800.1:gene=PF3D7_0935800:organism=Plasmodium_falciparum_3D7:gene_product=cytoadherence_linked_asexual_protein_9:transcript_product=cytoadherence_linked_asexual_protein_9:location=Pf3D7_09_v3:1413840-1419754(+):protein_length=1340:sequence_SO=chromosome:SO=protein_coding_seq51	PF3D7_0935800.1-p1	(1251, 1312)	cytoadherence_linked_asexual_protein_9	MVSRVRNKENVVQEVQEDKGTDITPLPTFDIMDSKQNTNYMYNDNEDYFDDLDDNEQFLNSK
PF3D7_0935800.1-p1:transcript=PF3D7_0935800.1:gene=PF3D7_0935800:organism=Plasmodium_falciparum_3D7:gene_product=cytoadherence_linked_asexual_protein_9:transcript_product=cytoadherence_linked_asexual_protein_9:location=Pf3D7_09_v3:1413840-1419754(+):protein_length=1340:sequence_SO=chromosome:SO=protein_coding_seq53	PF3D7_0935800.1-p1	(1301, 1362)	cytoadherence_linked_asexual_protein_9	FDIMDSKQNTNYMYNDNEDYFDDLDDNEQFLNSKDLLYYDDGIDRTKRYELIPLQRYRYDPF
PF3D7_0935800.1-p1:transcript=PF3D7_0935800.1:gene=PF3D7_0935800:organism=Plasmodium_falciparum_3D7:gene_product=cytoadherence_linked_asexual_protein_9:transcript_product=cytoadherence_linked_asexual_protein_9:location=Pf3D7_09_v3:1413840-1419754(+):protein_length=1340:sequence_SO=chromosome:SO=protein_coding_seq52	PF3D7_0935800.1-p1	(1276, 1337)	cytoadherence_linked_asexual_protein_9	LPTFDIMDSKQNTNYMYNDNEDYFDDLDDNEQFLNSKDLLYYDDGIDRTKRYELIPLQRYRY
PFIT_0811500.1-p1:transcript=PFIT_0811500.1:gene=PFIT_0811500:organism=Plasmodium_falciparum_IT:gene_product=erythrocyte_membrane_protein_1__PfEMP1:transcript_product=erythrocyte_membrane_protein_1__PfEMP1:location=PfIT_08_v3:482075-491065(+):protein_length=2349:sequence_SO=chromosome:SO=protein_coding_seq30	PFIT_0811500.1-p1	(726, 787)	var	NLKLQFLKKDSEDSAEDSQSRDEDAEEMKHLKKILKLENENTLAVVNAGTEENTTIDKLLEQ
PFIT_1037600.1-p1:transcript=PFIT_1037600.1:gene=PFIT_1037600:organism=Plasmodium_falciparum_IT:gene_product=gametocyte-specific_protein:transcript_product=gametocyte-specific_protein:location=PfIT_10_v3:1449546-1470959(+):protein_length=7099:sequence_SO=chromosome:SO=protein_coding_seq107	PFIT_1037600.1-p1	(2651, 2712)	gametocyte-specific_protein	VIPEEVAVEVVPEEVIEEAVPEEIVEEFIPEEQIEEVIQEEIIEQVVPEELIEEVVPEEIIE
PFIT_1037600.1-p1:transcript=PFIT_1037600.1:gene=PFIT_1037600:organism=Plasmodium_falciparum_IT:gene_product=gametocyte-specific_protein:transcript_product=gametocyte-specific_protein:location=PfIT_10_v3:1449546-1470959(+):protein_length=7099:sequence_SO=chromosome:SO=protein_coding_seq106	PFIT_1037600.1-p1	(2626, 2687)	gametocyte-specific_protein	PEVEIEELIPDEVVEEVLPEELVEEVIPEEVAVEVVPEEVIEEAVPEEIVEEFIPEEQIEEV
PFIT_1037600.1-p1:transcript=PFIT_1037600.1:gene=PFIT_1037600:organism=Plasmodium_falciparum_IT:gene_product=gametocyte-specific_protein:transcript_product=gametocyte-specific_protein:location=PfIT_10_v3:1449546-1470959(+):protein_length=7099:sequence_SO=chromosome:SO=protein_coding_seq105	PFIT_1037600.1-p1	(2601, 2662)	gametocyte-specific_protein	EVVEEIIPEVEIEEVLPEEVIEEVVPEVEIEELIPDEVVEEVLPEELVEEVIPEEVAVEVVP
PFIT_1037600.1-p1:transcript=PFIT_1037600.1:gene=PFIT_1037600:organism=Plasmodium_falciparum_IT:gene_product=gametocyte-specific_protein:transcript_product=gametocyte-specific_protein:location=PfIT_10_v3:1449546-1470959(+):protein_length=7099:sequence_SO=chromosome:SO=protein_coding_seq104	PFIT_1037600.1-p1	(2576, 2637)	gametocyte-specific_protein	VKEVIPEEIAEEVIPKELVEEVIPEEVVEEIIPEVEIEEVLPEEVIEEVVPEVEIEELIPDE
PFIT_1037600.1-p1:transcript=PFIT_1037600.1:gene=PFIT_1037600:organism=Plasmodium_falciparum_IT:gene_product=gametocyte-specific_protein:transcript_product=gametocyte-specific_protein:location=PfIT_10_v3:1449546-1470959(+):protein_length=7099:sequence_SO=chromosome:SO=protein_coding_seq103	PFIT_1037600.1-p1	(2551, 2612)	gametocyte-specific_protein	ELIDEVVPEEVTEEVITEEVMPEEVVKEVIPEEIAEEVIPKELVEEVIPEEVVEEIIPEVEI
PFIT_1037600.1-p1:transcript=PFIT_1037600.1:gene=PFIT_1037600:organism=Plasmodium_falciparum_IT:gene_product=gametocyte-specific_protein:transcript_product=gametocyte-specific_protein:location=PfIT_10_v3:1449546-1470959(+):protein_length=7099:sequence_SO=chromosome:SO=protein_coding_seq102	PFIT_1037600.1-p1	(2526, 2587)	gametocyte-specific_protein	VQEVIPEEVVEEIITEVEIEEVLPEELIDEVVPEEVTEEVITEEVMPEEVVKEVIPEEIAEE
PFIT_1037600.1-p1:transcript=PFIT_1037600.1:gene=PFIT_1037600:organism=Plasmodium_falciparum_IT:gene_product=gametocyte-specific_protein:transcript_product=gametocyte-specific_protein:location=PfIT_10_v3:1449546-1470959(+):protein_length=7099:sequence_SO=chromosome:SO=protein_coding_seq101	PFIT_1037600.1-p1	(2501, 2562)	gametocyte-specific_protein	ELVAKEVIEEVITEEVAEEVIPEEIVQEVIPEEVVEEIITEVEIEEVLPEELIDEVVPEEVT
PFIT_1037600.1-p1:transcript=PFIT_1037600.1:gene=PFIT_1037600:organism=Plasmodium_falciparum_IT:gene_product=gametocyte-specific_protein:transcript_product=gametocyte-specific_protein:location=PfIT_10_v3:1449546-1470959(+):protein_length=7099:sequence_SO=chromosome:SO=protein_coding_seq108	PFIT_1037600.1-p1	(2676, 2737)	gametocyte-specific_protein	EEFIPEEQIEEVIQEEIIEQVVPEELIEEVVPEEIIEEVIPEEIVEEVIYEEVIPEELVEEV
MAL6P1.4_D3_seq10	MAL6P1.4_D3	(226, 287)	var	KKDELLTSIKEGYGDANEIKHIKALLEDEENEETQEEETAGADNQKKNTIDWLIQHEEDDAE
PFL1950w_D7_seq11	PFL1950w_D7	(251, 312)	var	DDTKYVSNNVYSGIDLINDSLNSGNQPIDIYDELLKRKENELFGTNHPKHTNTHNVTKSSNS
PF3D7_0522100.1-p1:transcript=PF3D7_0522100.1:gene=PF3D7_0522100:organism=Plasmodium_falciparum_3D7:gene_product=conserved_Plasmodium_protein__unknown_function:transcript_product=conserved_Plasmodium_protein__unknown_function:location=Pf3D7_05_v3:897465-899756(-):protein_length=763:sequence_SO=chromosome:SO=protein_coding_seq16	PF3D7_0522100.1-p1	(376, 437)	PF3D7_0522100.1-p1conserved_Plasmodium_protein__unknown_function	SSASINREKNMKHTIIFDYVENEKDKNINKEKNKKQMNTFVPKYNNLTPKEIHYNSLCGNDN
PF3D7_1201400.1-p1:transcript=PF3D7_1201400.1:gene=PF3D7_1201400:organism=Plasmodium_falciparum_3D7:gene_product=Plasmodium_exported_protein__unknown_function:transcript_product=Plasmodium_exported_protein__unknown_function:location=Pf3D7_12_v3:93581-97146(-):protein_length=1129:sequence_SO=chromosome:SO=protein_coding_seq41	PF3D7_1201400.1-p1	(1001, 1062)	PF3D7_1201400.1-p1Plasmodium_exported_protein__unknown_function	DMNKEENNEGNNEINKKENNKINDDMNKEENNEGNNEINKEENNEENNEENNETNKEENNKG
PF3D7_1201400.1-p1:transcript=PF3D7_1201400.1:gene=PF3D7_1201400:organism=Plasmodium_falciparum_3D7:gene_product=Plasmodium_exported_protein__unknown_function:transcript_product=Plasmodium_exported_protein__unknown_function:location=Pf3D7_12_v3:93581-97146(-):protein_length=1129:sequence_SO=chromosome:SO=protein_coding_seq40	PF3D7_1201400.1-p1	(976, 1037)	PF3D7_1201400.1-p1Plasmodium_exported_protein__unknown_function	NDMNKEENNEGNNEINKEENNKINDDMNKEENNEGNNEINKKENNKINDDMNKEENNEGNNE
PF3D7_0606100.1-p1:transcript=PF3D7_0606100.1:gene=PF3D7_0606100:organism=Plasmodium_falciparum_3D7:gene_product=RNA-binding_protein__putative:transcript_product=RNA-binding_protein__putative:location=Pf3D7_06_v3:257604-259974(+):protein_length=582:sequence_SO=chromosome:SO=protein_coding_seq14	PF3D7_0606100.1-p1	(326, 387)	PF3D7_0606100.1-p1RNA-binding_protein__putative	NNLVQATNPYLLNVNNTENANLQQINLETANSRQEGKRNDTQNDKTEKENEKENEKEKDKEN
PF3D7_1133800.1-p1:transcript=PF3D7_1133800.1:gene=PF3D7_1133800:organism=Plasmodium_falciparum_3D7:gene_product=RNA_(uracil-5-)methyltransferase__putative:transcript_product=RNA_(uracil-5-)methyltransferase__putative:location=Pf3D7_11_v3:1309024-1311793(+):protein_length=857:sequence_SO=chromosome:SO=protein_coding_seq16	PF3D7_1133800.1-p1	(376, 437)	PF3D7_1133800.1-p1RNA_(uracil-5-)methyltransferase__putative	SNIFNEDIDLNNIQDYYDQKQNKKNQTSKDNCINKTVLTDIKTNNSITRETSLNEKMKQYNI
PF3D7_1133800.1-p1:transcript=PF3D7_1133800.1:gene=PF3D7_1133800:organism=Plasmodium_falciparum_3D7:gene_product=RNA_(uracil-5-)methyltransferase__putative:transcript_product=RNA_(uracil-5-)methyltransferase__putative:location=Pf3D7_11_v3:1309024-1311793(+):protein_length=857:sequence_SO=chromosome:SO=protein_coding_seq15	PF3D7_1133800.1-p1	(351, 412)	PF3D7_1133800.1-p1RNA_(uracil-5-)methyltransferase__putative	KCKDQILFNLKSKWMKQNILFGDIESNIFNEDIDLNNIQDYYDQKQNKKNQTSKDNCINKTV
PFIT_1473800.1-p1:transcript=PFIT_1473800.1:gene=PFIT_1473800:organism=Plasmodium_falciparum_IT:gene_product=DNA-directed_RNA_polymerase__alpha_subunit__putative:transcript_product=DNA-directed_RNA_polymerase__alpha_subunit__putative:location=PfIT_14_v3:2989339-2991879(+):protein_length=846:sequence_SO=chromosome:SO=protein_coding_seq32	PFIT_1473800.1-p1	(776, 837)	PFIT_1473800.1-p1DNA-directed_RNA_polymerase__alpha_subunit__putative	QLPIQDTPPPFLDTLEWLKMEVKKENNKKNITQFKNTKGKGTKYKDKFNKNKTYDYDEYLNE
PFIT_0417200.1-p1:transcript=PFIT_0417200.1:gene=PFIT_0417200:organism=Plasmodium_falciparum_IT:gene_product=regulator_of_chromosome_condensation__putative:transcript_product=regulator_of_chromosome_condensation__putative:location=PfIT_04_v3:860150-866188(+):protein_length=2012:sequence_SO=chromosome:SO=protein_coding_seq36	PFIT_0417200.1-p1	(876, 937)	PFIT_0417200.1-p1regulator_of_chromosome_condensation__putative	PFIKGLADSFTFSKKNENNKYSSCDEKYQNHKNHETDEGSNRLYFSDACSSNEKKKSKKHNV
PF3D7_1038400.1-p1:transcript=PF3D7_1038400.1:gene=PF3D7_1038400:organism=Plasmodium_falciparum_3D7:gene_product=gametocyte-specific_protein:transcript_product=gametocyte-specific_protein:location=Pf3D7_10_v3:1519021-1547825(+):protein_length=9563:sequence_SO=chromosome:SO=protein_coding_seq101	PF3D7_1038400.1-p1	(2501, 2562)	gametocyte-specific_protein	EEVVEEVIPEELVEEVIPEEIVEEVLPEEVVKEVIPEEVVEEVIPEELVEEVIPEELVEEVI
PF3D7_1038400.1-p1:transcript=PF3D7_1038400.1:gene=PF3D7_1038400:organism=Plasmodium_falciparum_3D7:gene_product=gametocyte-specific_protein:transcript_product=gametocyte-specific_protein:location=Pf3D7_10_v3:1519021-1547825(+):protein_length=9563:sequence_SO=chromosome:SO=protein_coding_seq100	PF3D7_1038400.1-p1	(2476, 2537)	gametocyte-specific_protein	LVEEVIPEEIVEEVLPEEVVKEVIPEEVVEEVIPEELVEEVIPEEIVEEVLPEEVVKEVIPE
PF3D7_1038400.1-p1:transcript=PF3D7_1038400.1:gene=PF3D7_1038400:organism=Plasmodium_falciparum_3D7:gene_product=gametocyte-specific_protein:transcript_product=gametocyte-specific_protein:location=Pf3D7_10_v3:1519021-1547825(+):protein_length=9563:sequence_SO=chromosome:SO=protein_coding_seq103	PF3D7_1038400.1-p1	(2551, 2612)	gametocyte-specific_protein	EVIPEELVEEVIPEELVEEVVSEELVEEVIPEEIVEEVIPEELLEEVVEEVVPEIVEEVVPE
PF3D7_1038400.1-p1:transcript=PF3D7_1038400.1:gene=PF3D7_1038400:organism=Plasmodium_falciparum_3D7:gene_product=gametocyte-specific_protein:transcript_product=gametocyte-specific_protein:location=Pf3D7_10_v3:1519021-1547825(+):protein_length=9563:sequence_SO=chromosome:SO=protein_coding_seq102	PF3D7_1038400.1-p1	(2526, 2587)	gametocyte-specific_protein	LPEEVVKEVIPEEVVEEVIPEELVEEVIPEELVEEVIPEELVEEVVSEELVEEVIPEEIVEE
PF3D7_1038400.1-p1:transcript=PF3D7_1038400.1:gene=PF3D7_1038400:organism=Plasmodium_falciparum_3D7:gene_product=gametocyte-specific_protein:transcript_product=gametocyte-specific_protein:location=Pf3D7_10_v3:1519021-1547825(+):protein_length=9563:sequence_SO=chromosome:SO=protein_coding_seq105	PF3D7_1038400.1-p1	(2601, 2662)	gametocyte-specific_protein	VVPEIVEEVVPEVVEEVITEEVIPEELIKEVIPEELVEEVIPEEIVEEVIPEEIVEEVISEE
PF3D7_1038400.1-p1:transcript=PF3D7_1038400.1:gene=PF3D7_1038400:organism=Plasmodium_falciparum_3D7:gene_product=gametocyte-specific_protein:transcript_product=gametocyte-specific_protein:location=Pf3D7_10_v3:1519021-1547825(+):protein_length=9563:sequence_SO=chromosome:SO=protein_coding_seq104	PF3D7_1038400.1-p1	(2576, 2637)	gametocyte-specific_protein	VEEVIPEEIVEEVIPEELLEEVVEEVVPEIVEEVVPEVVEEVITEEVIPEELIKEVIPEELV
PF3D7_1038400.1-p1:transcript=PF3D7_1038400.1:gene=PF3D7_1038400:organism=Plasmodium_falciparum_3D7:gene_product=gametocyte-specific_protein:transcript_product=gametocyte-specific_protein:location=Pf3D7_10_v3:1519021-1547825(+):protein_length=9563:sequence_SO=chromosome:SO=protein_coding_seq107	PF3D7_1038400.1-p1	(2651, 2712)	gametocyte-specific_protein	PEEIVEEVISEEVVEEVVPEVVVEEVIPEEIVEEVLPKEIVEEVISEKVVEEMIPEELVEEV
PF3D7_1038400.1-p1:transcript=PF3D7_1038400.1:gene=PF3D7_1038400:organism=Plasmodium_falciparum_3D7:gene_product=gametocyte-specific_protein:transcript_product=gametocyte-specific_protein:location=Pf3D7_10_v3:1519021-1547825(+):protein_length=9563:sequence_SO=chromosome:SO=protein_coding_seq106	PF3D7_1038400.1-p1	(2626, 2687)	gametocyte-specific_protein	ELIKEVIPEELVEEVIPEEIVEEVIPEEIVEEVISEEVVEEVVPEVVVEEVIPEEIVEEVLP
PF3D7_1038400.1-p1:transcript=PF3D7_1038400.1:gene=PF3D7_1038400:organism=Plasmodium_falciparum_3D7:gene_product=gametocyte-specific_protein:transcript_product=gametocyte-specific_protein:location=Pf3D7_10_v3:1519021-1547825(+):protein_length=9563:sequence_SO=chromosome:SO=protein_coding_seq109	PF3D7_1038400.1-p1	(2701, 2762)	gametocyte-specific_protein	EEMIPEELVEEVIPEEVVEEVIPEVEIEEILPEELIEELVAEEVIEEVIPKELIEEVIPEKL
PF3D7_1038400.1-p1:transcript=PF3D7_1038400.1:gene=PF3D7_1038400:organism=Plasmodium_falciparum_3D7:gene_product=gametocyte-specific_protein:transcript_product=gametocyte-specific_protein:location=Pf3D7_10_v3:1519021-1547825(+):protein_length=9563:sequence_SO=chromosome:SO=protein_coding_seq108	PF3D7_1038400.1-p1	(2676, 2737)	gametocyte-specific_protein	VIPEEIVEEVLPKEIVEEVISEKVVEEMIPEELVEEVIPEEVVEEVIPEVEIEEILPEELIE
PFCLINvar32_seq31	PFCLINvar32	(751, 812)	var	HMQKKAKAQLGSGSDKGESALKGNIRNAKFKNGRSPNTLTNVCDITKEHPNDSRRRRHYHRP
PFIT_1473800.1-p1:transcript=PFIT_1473800.1:gene=PFIT_1473800:organism=Plasmodium_falciparum_IT:gene_product=DNA-directed_RNA_polymerase__alpha_subunit__putative:transcript_product=DNA-directed_RNA_polymerase__alpha_subunit__putative:location=PfIT_14_v3:2989339-2991879(+):protein_length=846:sequence_SO=chromosome:SO=protein_coding_seq31	PFIT_1473800.1-p1	(751, 812)	PFIT_1473800.1-p1DNA-directed_RNA_polymerase__alpha_subunit__putative	QKNKSLDPFSQELMNPDNFPKHSNIQLPIQDTPPPFLDTLEWLKMEVKKENNKKNITQFKNT
PF3D7_0501800.1-p1:transcript=PF3D7_0501800.1:gene=PF3D7_0501800:organism=Plasmodium_falciparum_3D7:gene_product=chromosome_assembly_factor_1:transcript_product=chromosome_assembly_factor_1:location=Pf3D7_05_v3:91361-94591(+):protein_length=1076:sequence_SO=chromosome:SO=protein_coding_seq31	PF3D7_0501800.1-p1	(751, 812)	chromosome_assembly_factor_1	NEDGNDEDNTEENVEEKKDDIKEEKQDDLKEEKKDDSKDDSKDDSKDDSKDNSKDDSKGDSK
PF3D7_0501800.1-p1:transcript=PF3D7_0501800.1:gene=PF3D7_0501800:organism=Plasmodium_falciparum_3D7:gene_product=chromosome_assembly_factor_1:transcript_product=chromosome_assembly_factor_1:location=Pf3D7_05_v3:91361-94591(+):protein_length=1076:sequence_SO=chromosome:SO=protein_coding_seq36	PF3D7_0501800.1-p1	(876, 937)	chromosome_assembly_factor_1	ELDINNKLNADEEEGKNDIMDKYNDNNDNVEILNEQDASSELKDKKEERFIYTLGTFDGSVY
PF08_0140_D2_seq14	PF08_0140_D2	(326, 387)	var	EIPKYVSKKVKTNSTINNYYYYDFYEKLQKNEYGNIDAFLNLLKEGKYCKENLPEEEVINFT
PF08_0140_D2_seq13	PF08_0140_D2	(301, 362)	var	ACSLYKIWVANQKKEFEKQKKKYEKEIPKYVSKKVKTNSTINNYYYYDFYEKLQKNEYGNID
DD2var48_seq36	DD2var48	(876, 937)	var	DASQGNYSRGVSGDDFKKNLCGITQKHSNDSRPNGEPCTGKDGSKEGVRMKIGTEWSYIKEK
DD2var48_seq37	DD2var48	(901, 962)	var	KHSNDSRPNGEPCTGKDGSKEGVRMKIGTEWSYIKEKEMSYKDFYLPPRREHMCTSNLENLS
PF3D7_0800500.1-p1:transcript=PF3D7_0800500.1:gene=PF3D7_0800500:organism=Plasmodium_falciparum_3D7:gene_product=rifin:transcript_product=rifin:location=Pf3D7_08_v3:56352-57703(-):protein_length=375:sequence_SO=chromosome:SO=protein_coding_seq4	PF3D7_0800500.1-p1	(76, 137)	rifin	LEYDERMKTTRQKCKDKCDEAIQKIILKDKLEKELMDKFATLHTDMQSDAIPTCVCEKSLAD
PFIT_1037600.1-p1:transcript=PFIT_1037600.1:gene=PFIT_1037600:organism=Plasmodium_falciparum_IT:gene_product=gametocyte-specific_protein:transcript_product=gametocyte-specific_protein:location=PfIT_10_v3:1449546-1470959(+):protein_length=7099:sequence_SO=chromosome:SO=protein_coding_seq67	PFIT_1037600.1-p1	(1651, 1712)	gametocyte-specific_protein	ELVAEVIPEEIVEEVVPEELVEEVVPEEVVEEVIPKEIVEEVVSEEVVEEVIPKEIVEEEVP
PFIT_1037600.1-p1:transcript=PFIT_1037600.1:gene=PFIT_1037600:organism=Plasmodium_falciparum_IT:gene_product=gametocyte-specific_protein:transcript_product=gametocyte-specific_protein:location=PfIT_10_v3:1449546-1470959(+):protein_length=7099:sequence_SO=chromosome:SO=protein_coding_seq64	PFIT_1037600.1-p1	(1576, 1637)	gametocyte-specific_protein	IPEEVVEEVIPEEVVEEVVPEELVEEVVPEELVAEVIPEKLVEEVIPEEVAEEVLPEELIEE
PFIT_1037600.1-p1:transcript=PFIT_1037600.1:gene=PFIT_1037600:organism=Plasmodium_falciparum_IT:gene_product=gametocyte-specific_protein:transcript_product=gametocyte-specific_protein:location=PfIT_10_v3:1449546-1470959(+):protein_length=7099:sequence_SO=chromosome:SO=protein_coding_seq63	PFIT_1037600.1-p1	(1551, 1612)	gametocyte-specific_protein	EELVAEVIPEELIEEVVTEELVEEVIPEEVVEEVIPEEVVEEVVPEELVEEVVPEELVAEVI
PFIT_1037600.1-p1:transcript=PFIT_1037600.1:gene=PFIT_1037600:organism=Plasmodium_falciparum_IT:gene_product=gametocyte-specific_protein:transcript_product=gametocyte-specific_protein:location=PfIT_10_v3:1449546-1470959(+):protein_length=7099:sequence_SO=chromosome:SO=protein_coding_seq62	PFIT_1037600.1-p1	(1526, 1587)	gametocyte-specific_protein	IVEEVIPEELVEEVVPEELVAEVIPEELVAEVIPEELIEEVVTEELVEEVIPEEVVEEVIPE
PF3D7_0628100.1-p1:transcript=PF3D7_0628100.1:gene=PF3D7_0628100:organism=Plasmodium_falciparum_3D7:gene_product=HECT-domain_(ubiquitin-transferase)__putative:transcript_product=HECT-domain_(ubiquitin-transferase)__putative:location=Pf3D7_06_v3:1122801-1153664(-):protein_length=10287:sequence_SO=chromosome:SO=protein_coding_seq161	PF3D7_0628100.1-p1	(4001, 4062)	PF3D7_0628100.1-p1HECT-domain_(ubiquitin-transferase)__putative	PDDYVYNNRCIKYKGMDLKMSNFFFKYYDTNMKKNYNESKIHGFFLLRCLPPIKMFPKQLVI
PFIT_1037600.1-p1:transcript=PFIT_1037600.1:gene=PFIT_1037600:organism=Plasmodium_falciparum_IT:gene_product=gametocyte-specific_protein:transcript_product=gametocyte-specific_protein:location=PfIT_10_v3:1449546-1470959(+):protein_length=7099:sequence_SO=chromosome:SO=protein_coding_seq60	PFIT_1037600.1-p1	(1476, 1537)	gametocyte-specific_protein	VEEVVPEVVEEVVPEIVEEVVPEVVEEVVPEEIIEEKISEEVVEEVLPKEIVEEVIPEELVE
PFIT_1368600.1-p1:transcript=PFIT_1368600.1:gene=PFIT_1368600:organism=Plasmodium_falciparum_IT:gene_product=conserved_Plasmodium_protein__unknown_function:transcript_product=conserved_Plasmodium_protein__unknown_function:location=PfIT_13_v3:2726539-2729244(-):protein_length=901:sequence_SO=chromosome:SO=protein_coding_seq2	PFIT_1368600.1-p1	(26, 87)	PFIT_1368600.1-p1conserved_Plasmodium_protein__unknown_function	GNNKGNLFLHSNKRNNILNRNKYNTNKKCKSILYNKDIENSDISSEEKEALIREQIKKEKEE
PF3D7_1125800.1-p1:transcript=PF3D7_1125800.1:gene=PF3D7_1125800:organism=Plasmodium_falciparum_3D7:gene_product=kelch_domain-containing_protein__putative:transcript_product=kelch_domain-containing_protein__putative:location=Pf3D7_11_v3:1008409-1010853(-):protein_length=592:sequence_SO=chromosome:SO=protein_coding_seq20	PF3D7_1125800.1-p1	(476, 537)	PF3D7_1125800.1-p1kelch_domain-containing_protein__putative	SDVFSMSPLVTYVSYKTLTGKIEQLNTRMKNINETSSENENMNISEFETKITELKEDINKIN
IT4var32a_seq99	IT4var32a	(2451, 2512)	var	YSGQNNVYSGIDPTSDNRGPYSDKNDRISDNHHPYSGIDLINDTLSGNKNIDIYDELLKRKE
IT4var32a_seq91	IT4var32a	(2251, 2312)	var	GTPTPKSSNRYIPYRSGPYKGKTYIYMEGDSDSGHYYEDTTDITSSESEYEELDINDIYVPG
IT4var32a_seq93	IT4var32a	(2301, 2362)	var	EELDINDIYVPGSPKYKTLIEVVLEPSGNNTTVSGNNTRASGKNTPSDTQNDIQDDGIPSSK
PFIT_0202900.1-p1:transcript=PFIT_0202900.1:gene=PFIT_0202900:organism=Plasmodium_falciparum_IT:gene_product=conserved_Plasmodium_protein__unknown_function:transcript_product=conserved_Plasmodium_protein__unknown_function:location=PfIT_02_v3:112012-113922(+):protein_length=636:sequence_SO=chromosome:SO=protein_coding_seq8	PFIT_0202900.1-p1	(176, 237)	PFIT_0202900.1-p1conserved_Plasmodium_protein__unknown_function	KVGSDNNRNKNIIMRHTNINNKEHYLQKKYNIQDDEEEDNETIRSDSKLRDIYSDSQSKDIM
PF3D7_1441300.1-p1:transcript=PF3D7_1441300.1:gene=PF3D7_1441300:organism=Plasmodium_falciparum_3D7:gene_product=serine/threonine_protein_kinase__putative:transcript_product=serine/threonine_protein_kinase__putative:location=Pf3D7_14_v3:1681791-1689157(+):protein_length=2247:sequence_SO=chromosome:SO=protein_coding_seq79	PF3D7_1441300.1-p1	(1951, 2012)	PF3D7_1441300.1-p1serine/threonine_protein_kinase__putative	KKCEPNQQFNDNVKNYKVDNVVSDFILTSEESLMTKKNNKNYKNDKNDKNYFDNSNIISYNE
PREICHvar67_seq22	PREICHvar67	(526, 587)	var	NRQKLYTFTTNAQPTHIDVISFGDIRKEIKNKIDEFCAENGQKDELKEEWKCYEGNDVKKVE
PF3D7_1019400.1-p1:transcript=PF3D7_1019400.1:gene=PF3D7_1019400:organism=Plasmodium_falciparum_3D7:gene_product=60S_ribosomal_protein_L30e__putative:transcript_product=60S_ribosomal_protein_L30e__putative:location=Pf3D7_10_v3:786503-787008(+):protein_length=108:sequence_SO=chromosome:SO=protein_coding_seq3	PF3D7_1019400.1-p1	(51, 112)	PF3D7_1019400.1-p160S_ribosomal_protein_L30e__putative	VSSNCPSIQRSVIEYYAMLSKCGVHDYHGDNNDLGTACGKLFRISCLVITDVGDSDIIKTNE
PF3D7_0529400.2-p1:transcript=PF3D7_0529400.2:gene=PF3D7_0529400:organism=Plasmodium_falciparum_3D7:gene_product=conserved_Plasmodium_protein__unknown_function:transcript_product=conserved_Plasmodium_protein__unknown_function:location=Pf3D7_05_v3:1199165-1205187(+):protein_length=1502:sequence_SO=chromosome:SO=protein_coding_seq36	PF3D7_0529400.2-p1	(876, 937)	PF3D7_0529400.2-p1conserved_Plasmodium_protein__unknown_function	TPDRHDAYDGYRGDLYLNSQYSDMEKHEDVRSYQNSYPYETQNEKGALTIIRLPAENKKQNM
PFD0625c_D4_seq7	PFD0625c_D4	(151, 212)	var	PKNEVGGAAGVLQTIGGTLENSGEQNPQKKLQESGEIPDDFLRQMFYTLGDYRDILVRGVAD
PFD0625c_D4_seq9	PFD0625c_D4	(201, 262)	var	DYRDILVRGVADDKNGGNNIILNASGNKEDMEKMKKIQQEIDKILEKSGSEAASGAQKNSGI
PFD0625c_D4_seq8	PFD0625c_D4	(176, 237)	var	NPQKKLQESGEIPDDFLRQMFYTLGDYRDILVRGVADDKNGGNNIILNASGNKEDMEKMKKI
PFIT_0628200.1-p1:transcript=PFIT_0628200.1:gene=PFIT_0628200:organism=Plasmodium_falciparum_IT:gene_product=phosphatidylcholine-sterol_acyltransferase__putative:transcript_product=phosphatidylcholine-sterol_acyltransferase__putative:location=PfIT_06_v3:1138747-1141326(+):protein_length=859:sequence_SO=chromosome:SO=protein_coding_seq8	PFIT_0628200.1-p1	(176, 237)	PFIT_0628200.1-p1phosphatidylcholine-sterol_acyltransferase__putative	VGQQNDPVGQQNDYVGQQNDYVGQQNDPVGQQNDSVGQQNDYVGQQNDPVGQQNDPVGQQND
PF3D7_0618100.1-p1:transcript=PF3D7_0618100.1:gene=PF3D7_0618100:organism=Plasmodium_falciparum_3D7:gene_product=conserved_Plasmodium_protein__unknown_function:transcript_product=conserved_Plasmodium_protein__unknown_function:location=Pf3D7_06_v3:761939-764170(+):protein_length=743:sequence_SO=chromosome:SO=protein_coding_seq23	PF3D7_0618100.1-p1	(551, 612)	PF3D7_0618100.1-p1conserved_Plasmodium_protein__unknown_function	ENEYNKNVDKNEKESRYEKQYEDKNEDEEKLDYCDDLENNNINKLIVEKLKTNGVMDKLFKN
PFIT_0400900.1-p1:transcript=PFIT_0400900.1:gene=PFIT_0400900:organism=Plasmodium_falciparum_IT:gene_product=surface-associated_interspersed_protein_4.1_(SURFIN_4.1):transcript_product=surface-associated_interspersed_protein_4.1_(SURFIN_4.1):location=PfIT_04_v3:157505-164297(-):protein_length=2221:sequence_SO=chromosome:SO=protein_coding_seq22	PFIT_0400900.1-p1	(526, 587)	Surfin	PQMEAITNKYMPGSIYENPSSGSSHIEDKGQLKDFTIETVKYTSDGLNGFDHEVAVTDPKLL
PFIT_0400900.1-p1:transcript=PFIT_0400900.1:gene=PFIT_0400900:organism=Plasmodium_falciparum_IT:gene_product=surface-associated_interspersed_protein_4.1_(SURFIN_4.1):transcript_product=surface-associated_interspersed_protein_4.1_(SURFIN_4.1):location=PfIT_04_v3:157505-164297(-):protein_length=2221:sequence_SO=chromosome:SO=protein_coding_seq28	PFIT_0400900.1-p1	(676, 737)	Surfin	STTSPTNSYSLPQITLEFEAPAQGTVMGMLGQVNPFSSLAQTSQEDSTSSSESRSSSFSHNS
PFIT_0812500.1-p1:transcript=PFIT_0812500.1:gene=PFIT_0812500:organism=Plasmodium_falciparum_IT:gene_product=peptidase_family_C50__putative:transcript_product=peptidase_family_C50__putative:location=PfIT_08_v3:522171-539597(-):protein_length=5808:sequence_SO=chromosome:SO=protein_coding_seq53	PFIT_0812500.1-p1	(1301, 1362)	PFIT_0812500.1-p1peptidase_family_C50__putative	GCLDMEKKEDDKFNQDSLFMNSVSPLKFVHNNNEEEYNEEKSKNDSTNNIIKHKHTNEKFNE
PF3D7_1442700.1-p1:transcript=PF3D7_1442700.1:gene=PF3D7_1442700:organism=Plasmodium_falciparum_3D7:gene_product=conserved_Plasmodium_protein__unknown_function:transcript_product=conserved_Plasmodium_protein__unknown_function:location=Pf3D7_14_v3:1742113-1749790(+):protein_length=2511:sequence_SO=chromosome:SO=protein_coding_seq65	PF3D7_1442700.1-p1	(1601, 1662)	PF3D7_1442700.1-p1conserved_Plasmodium_protein__unknown_function	KLNNSYDNIVNTLCSSVGGGESFHLSNNKNYKFNQNKSSNITRTSEHINLNSQRNKDKSKII
AY028643_seq13	AY028643	(301, 362)	var	DYVPQYLRWFEEWAEDFCRLRKHKLENAKNKCRKPNGVEKYCDLNRYDCEKTASGKHDFFED
PF3D7_0900900.1-p1:transcript=PF3D7_0900900.1:gene=PF3D7_0900900:organism=Plasmodium_falciparum_3D7:gene_product=stevor:transcript_product=stevor:location=Pf3D7_09_v3:55074-56081(-):protein_length=300:sequence_SO=chromosome:SO=protein_coding_seq4	PF3D7_0900900.1-p1	(76, 137)	Stevor	EAIKKYQQTHDPYKQLKEVVEKNGTKYTGGNDAEPMSTLEKELLETYEEVFGNDNHMLKSGM
PF3D7_0900900.1-p1:transcript=PF3D7_0900900.1:gene=PF3D7_0900900:organism=Plasmodium_falciparum_3D7:gene_product=stevor:transcript_product=stevor:location=Pf3D7_09_v3:55074-56081(-):protein_length=300:sequence_SO=chromosome:SO=protein_coding_seq3	PF3D7_0900900.1-p1	(51, 112)	Stevor	AQTKNHNPHYHNDPELKEIIDKMNEEAIKKYQQTHDPYKQLKEVVEKNGTKYTGGNDAEPMS
PF3D7_1103100.1-p1:transcript=PF3D7_1103100.1:gene=PF3D7_1103100:organism=Plasmodium_falciparum_3D7:gene_product=60S_acidic_ribosomal_protein_P1__putative:transcript_product=60S_acidic_ribosomal_protein_P1__putative:location=Pf3D7_11_v3:140048-140801(-):protein_length=118:sequence_SO=chromosome:SO=protein_coding_seq4	PF3D7_1103100.1-p1	(76, 137)	PF3D7_1103100.1-p160S_acidic_ribosomal_protein_P1__putative	FERALKGKDIQSLLSNLSVGSAPAAAAQVTTEKPSEDKKEAKKEEKVEEEEEEDDLGFSLFG
MAL7P1.1_D9_seq9	MAL7P1.1_D9	(201, 262)	var	IHDRDLNSGEEISYNIHMSTNTNNDIPKYVSNNVYSGIDLINDTLSDNKHIDIYDEVLKRKE
PF3D7_0310200.1-p1:transcript=PF3D7_0310200.1:gene=PF3D7_0310200:organism=Plasmodium_falciparum_3D7:gene_product=phd_finger_protein__putative:transcript_product=phd_finger_protein__putative:location=Pf3D7_03_v3:427290-440942(+):protein_length=4550:sequence_SO=chromosome:SO=protein_coding_seq19	PF3D7_0310200.1-p1	(451, 512)	PF3D7_0310200.1-p1phd_finger_protein__putative	QENIQNNTQENIQENIQNNTQNNTQNNTQNNTQNNTQNNTQGNIKDNIIYHMNDLINNHISD
PF3D7_0609900.1-p1:transcript=PF3D7_0609900.1:gene=PF3D7_0609900:organism=Plasmodium_falciparum_3D7:gene_product=conserved_Plasmodium_protein__unknown_function:transcript_product=conserved_Plasmodium_protein__unknown_function:location=Pf3D7_06_v3:425805-431858(+):protein_length=2017:sequence_SO=chromosome:SO=protein_coding_seq54	PF3D7_0609900.1-p1	(1326, 1387)	PF3D7_0609900.1-p1conserved_Plasmodium_protein__unknown_function	NEEAPSYGKKILMDNKMDDGDDDDDYYYYDDNYFNDKYSDKENDHDNYTHMNVHLENIEKSL
PF3D7_0922100.1-p1:transcript=PF3D7_0922100.1:gene=PF3D7_0922100:organism=Plasmodium_falciparum_3D7:gene_product=ubiquitin-like_protein__putative:transcript_product=ubiquitin-like_protein__putative:location=Pf3D7_09_v3:895415-900304(+):protein_length=1542:sequence_SO=chromosome:SO=protein_coding_seq48	PF3D7_0922100.1-p1	(1176, 1237)	PF3D7_0922100.1-p1ubiquitin-like_protein__putative	DKKKKNHHKKKSSNENNLFKDTNSYKSKSASHSFSDATSSHQEKQEKKNNLHNENASNKLNE
PF3D7_0922100.1-p1:transcript=PF3D7_0922100.1:gene=PF3D7_0922100:organism=Plasmodium_falciparum_3D7:gene_product=ubiquitin-like_protein__putative:transcript_product=ubiquitin-like_protein__putative:location=Pf3D7_09_v3:895415-900304(+):protein_length=1542:sequence_SO=chromosome:SO=protein_coding_seq41	PF3D7_0922100.1-p1	(1001, 1062)	PF3D7_0922100.1-p1ubiquitin-like_protein__putative	HNSTSNMNINADMYGSTNNVNNNANRNNYYPLPYDIRNSANRTNLQQEFEDYYKNFLPYVSD
Palo_Alto_A_MSPDBL1_seq3	MSPDBL1	(51, 112)	MSPDBL1	QDVPITSVDSSKIINANDLEGNSIDDTKGLSVTNSGFDDGSAFGGGLPFSGYSPLQGNHNKC
PF3D7_0500100.1-p1:transcript=PF3D7_0500100.1:gene=PF3D7_0500100:organism=Plasmodium_falciparum_3D7:gene_product=erythrocyte_membrane_protein_1__PfEMP1:transcript_product=erythrocyte_membrane_protein_1__PfEMP1:location=Pf3D7_05_v3:20929-28456(+):protein_length=2207:sequence_SO=chromosome:SO=protein_coding_seq76	PF3D7_0500100.1-p1	(1876, 1937)	var	VPGSPKYKTLIEVVLEPSGNNTTASGNNTTASDTQNDIQNDGIPSNKFSDNEWNTLKDDFIS
PF3D7_0500100.1-p1:transcript=PF3D7_0500100.1:gene=PF3D7_0500100:organism=Plasmodium_falciparum_3D7:gene_product=erythrocyte_membrane_protein_1__PfEMP1:transcript_product=erythrocyte_membrane_protein_1__PfEMP1:location=Pf3D7_05_v3:20929-28456(+):protein_length=2207:sequence_SO=chromosome:SO=protein_coding_seq77	PF3D7_0500100.1-p1	(1901, 1962)	var	GNNTTASDTQNDIQNDGIPSNKFSDNEWNTLKDDFISQYLQSEQPNDLPNDYKSGNVTLNTE
PF3D7_0830600.1-p1:transcript=PF3D7_0830600.1:gene=PF3D7_0830600:organism=Plasmodium_falciparum_3D7:gene_product=Plasmodium_exported_protein_(PHISTc)__unknown_function:transcript_product=Plasmodium_exported_protein_(PHISTc)__unknown_function:location=Pf3D7_08_v3:1303323-1304813(+):protein_length=456:sequence_SO=chromosome:SO=protein_coding_seq16	PF3D7_0830600.1-p1	(376, 437)	PF3D7_0830600.1-p1Plasmodium_exported_protein_(PHISTc)__unknown_function	IPQSTLANEWKKIVTYTNEELIQHNLTNISDFNTLVFNKIYDALDFIEFIKHKRESWKQFRE
PF3D7_1101300.1-p1:transcript=PF3D7_1101300.1:gene=PF3D7_1101300:organism=Plasmodium_falciparum_3D7:gene_product=rifin:transcript_product=rifin:location=Pf3D7_11_v3:73244-74442(-):protein_length=330:sequence_SO=chromosome:SO=protein_coding_seq6	PF3D7_1101300.1-p1	(126, 187)	rifin	DIPTCVCEKSLGDKVEKSCLKCGKNLGGFIPGLGLIGGTAVYAAAVNAATKAGMKAALDELK
PF3D7_1101300.1-p1:transcript=PF3D7_1101300.1:gene=PF3D7_1101300:organism=Plasmodium_falciparum_3D7:gene_product=rifin:transcript_product=rifin:location=Pf3D7_11_v3:73244-74442(-):protein_length=330:sequence_SO=chromosome:SO=protein_coding_seq4	PF3D7_1101300.1-p1	(76, 137)	rifin	FEEYNERLLENKQKCKEQCDKEIQKIILKDKLEKELAEKFVTLQTDISINDIPTCVCEKSLG
PF3D7_1101300.1-p1:transcript=PF3D7_1101300.1:gene=PF3D7_1101300:organism=Plasmodium_falciparum_3D7:gene_product=rifin:transcript_product=rifin:location=Pf3D7_11_v3:73244-74442(-):protein_length=330:sequence_SO=chromosome:SO=protein_coding_seq3	PF3D7_1101300.1-p1	(51, 112)	rifin	SPANYDSDPEMKAVMQGFDRQTSQRFEEYNERLLENKQKCKEQCDKEIQKIILKDKLEKELA
PF3D7_1101300.1-p1:transcript=PF3D7_1101300.1:gene=PF3D7_1101300:organism=Plasmodium_falciparum_3D7:gene_product=rifin:transcript_product=rifin:location=Pf3D7_11_v3:73244-74442(-):protein_length=330:sequence_SO=chromosome:SO=protein_coding_seq9	PF3D7_1101300.1-p1	(201, 262)	rifin	KDLVTATNFNCKDALLRRIDTITTPLCKSDEAVNNLYCSLKSGKQPMGFSKIKSKISNAAEW
PFIT_0501500.1-p1:transcript=PFIT_0501500.1:gene=PFIT_0501500:organism=Plasmodium_falciparum_IT:gene_product=interspersed_repeat_antigen:transcript_product=interspersed_repeat_antigen:location=PfIT_05_v3:84829-89348(+):protein_length=1447:sequence_SO=chromosome:SO=protein_coding_seq53	PFIT_0501500.1-p1	(1301, 1362)	interspersed_repeat_antigen	TVTTQEPVTTQEPVTTQEPVTTQEPVTPQQPVTPQQTVKPQQPVTPQQPATPQQPATPQQPA
PFIT_0501500.1-p1:transcript=PFIT_0501500.1:gene=PFIT_0501500:organism=Plasmodium_falciparum_IT:gene_product=interspersed_repeat_antigen:transcript_product=interspersed_repeat_antigen:location=PfIT_05_v3:84829-89348(+):protein_length=1447:sequence_SO=chromosome:SO=protein_coding_seq51	PFIT_0501500.1-p1	(1251, 1312)	interspersed_repeat_antigen	QEPVTTQEPVTTQEPVTTQEPVTTQEPVTTQEPVTTQEPVTTQETVAPQETVTTQEPVTTQE
PF3D7_0222100.1-p1:transcript=PF3D7_0222100.1:gene=PF3D7_0222100:organism=Plasmodium_falciparum_3D7:gene_product=Pfmc-2TM_Maurer's_cleft_two_transmembrane_protein:transcript_product=Pfmc-2TM_Maurer's_cleft_two_transmembrane_protein:location=Pf3D7_02_v3:878468-879251(-):protein_length=229:sequence_SO=chromosome:SO=protein_coding_seq4	PF3D7_0222100.1-p1	(76, 137)	Pfmc-2TM	ISSLVSLVDNMDITQEKKDKIKNLSLKYINSRDVKEKNESINELQKYSNNEECKEYMDSYLM
PFIT_1325700.1-p1:transcript=PFIT_1325700.1:gene=PFIT_1325700:organism=Plasmodium_falciparum_IT:gene_product=conserved_Plasmodium_protein__unknown_function:transcript_product=conserved_Plasmodium_protein__unknown_function:location=PfIT_13_v3:1064013-1070402(-):protein_length=2129:sequence_SO=chromosome:SO=protein_coding_seq72	PFIT_1325700.1-p1	(1776, 1837)	PFIT_1325700.1-p1conserved_Plasmodium_protein__unknown_function	DHNNKNNNNNNKNNNNNNKNNDHNNNNKNNSTFFKLKNIFCGAAFKDKECVKQDIHHNNELT
PF3D7_0726300.1-p1:transcript=PF3D7_0726300.1:gene=PF3D7_0726300:organism=Plasmodium_falciparum_3D7:gene_product=DNA_mismatch_repair_protein_PMS1__putative:transcript_product=DNA_mismatch_repair_protein_PMS1__putative:location=Pf3D7_07_v3:1104156-1108364(+):protein_length=1330:sequence_SO=chromosome:SO=protein_coding_seq28	PF3D7_0726300.1-p1	(676, 737)	PF3D7_0726300.1-p1DNA_mismatch_repair_protein_PMS1__putative	KNNIYEYKLNNDDTKNNIYEYKLNNDDTKNNIYEYKLNNDDSNNTIYEYKLNNDDSNNTIYE
PFIT_1431000.1-p1:transcript=PFIT_1431000.1:gene=PFIT_1431000:organism=Plasmodium_falciparum_IT:gene_product=coatamer_beta_subunit__putative:transcript_product=coatamer_beta_subunit__putative:location=PfIT_14_v3:1196701-1201243(+):protein_length=1407:sequence_SO=chromosome:SO=protein_coding_seq41	PFIT_1431000.1-p1	(1001, 1062)	PFIT_1431000.1-p1coatamer_beta_subunit__putative	NTFDGNNTFDGNNTFDGNNTFDGNNTFDGNNTFDGNNTFDGNNILEKSTYSRNKLFLNDQGE
PF3D7_1018700.1-p1:transcript=PF3D7_1018700.1:gene=PF3D7_1018700:organism=Plasmodium_falciparum_3D7:gene_product=conserved_Plasmodium_protein__unknown_function:transcript_product=conserved_Plasmodium_protein__unknown_function:location=Pf3D7_10_v3:747028-748887(+):protein_length=619:sequence_SO=chromosome:SO=protein_coding_seq1	PF3D7_1018700.1-p1	(1, 62)	PF3D7_1018700.1-p1conserved_Plasmodium_protein__unknown_function	MEDTEPDDEGEEYKIGKNIIHNNFYNQNFIKKFFFENIERKEIDYLKRDKKSSNNNKKFIVH
PF3D7_1040400.1-p1:transcript=PF3D7_1040400.1:gene=PF3D7_1040400:organism=Plasmodium_falciparum_3D7:gene_product=rifin:transcript_product=rifin:location=Pf3D7_10_v3:1612530-1613735(+):protein_length=348:sequence_SO=chromosome:SO=protein_coding_seq3	PF3D7_1040400.1-p1	(51, 112)	rifin	IPKYDNDADMKSVKENFDRQTSQRFEEYEERMIKNRQKRKEQRDKNIQKIIHKDKMEKNLAE
PFIT_1411300.1-p1:transcript=PFIT_1411300.1:gene=PFIT_1411300:organism=Plasmodium_falciparum_IT:gene_product=conserved_Plasmodium_protein__unknown_function:transcript_product=conserved_Plasmodium_protein__unknown_function:location=PfIT_14_v3:434238-447453(-):protein_length=4340:sequence_SO=chromosome:SO=protein_coding_seq91	PFIT_1411300.1-p1	(2251, 2312)	PFIT_1411300.1-p1conserved_Plasmodium_protein__unknown_function	VICEGLCEPSMQNTQKRKENKLQDDKRGENKIENDEMKDHKIDDNIKENDEMKDHKIDDNIK
PFIT_1411300.1-p1:transcript=PFIT_1411300.1:gene=PFIT_1411300:organism=Plasmodium_falciparum_IT:gene_product=conserved_Plasmodium_protein__unknown_function:transcript_product=conserved_Plasmodium_protein__unknown_function:location=PfIT_14_v3:434238-447453(-):protein_length=4340:sequence_SO=chromosome:SO=protein_coding_seq92	PFIT_1411300.1-p1	(2276, 2337)	PFIT_1411300.1-p1conserved_Plasmodium_protein__unknown_function	KRGENKIENDEMKDHKIDDNIKENDEMKDHKIDDNIKENNEMKDHKIDDNIKENDEMKDHKI
PFIT_1411300.1-p1:transcript=PFIT_1411300.1:gene=PFIT_1411300:organism=Plasmodium_falciparum_IT:gene_product=conserved_Plasmodium_protein__unknown_function:transcript_product=conserved_Plasmodium_protein__unknown_function:location=PfIT_14_v3:434238-447453(-):protein_length=4340:sequence_SO=chromosome:SO=protein_coding_seq93	PFIT_1411300.1-p1	(2301, 2362)	PFIT_1411300.1-p1conserved_Plasmodium_protein__unknown_function	EMKDHKIDDNIKENNEMKDHKIDDNIKENDEMKDHKIDDNIIENYEMKDHKIDDNIKENDEM
PFIT_1411300.1-p1:transcript=PFIT_1411300.1:gene=PFIT_1411300:organism=Plasmodium_falciparum_IT:gene_product=conserved_Plasmodium_protein__unknown_function:transcript_product=conserved_Plasmodium_protein__unknown_function:location=PfIT_14_v3:434238-447453(-):protein_length=4340:sequence_SO=chromosome:SO=protein_coding_seq94	PFIT_1411300.1-p1	(2326, 2387)	PFIT_1411300.1-p1conserved_Plasmodium_protein__unknown_function	IKENDEMKDHKIDDNIIENYEMKDHKIDDNIKENDEMKDHKIDDNIIKNDEMKDHKIDDNIK
PFIT_1411300.1-p1:transcript=PFIT_1411300.1:gene=PFIT_1411300:organism=Plasmodium_falciparum_IT:gene_product=conserved_Plasmodium_protein__unknown_function:transcript_product=conserved_Plasmodium_protein__unknown_function:location=PfIT_14_v3:434238-447453(-):protein_length=4340:sequence_SO=chromosome:SO=protein_coding_seq95	PFIT_1411300.1-p1	(2351, 2412)	PFIT_1411300.1-p1conserved_Plasmodium_protein__unknown_function	KIDDNIKENDEMKDHKIDDNIIKNDEMKDHKIDDNIKENDNIKDNFILEEQNLESQRTLIMI
PFIT_1411300.1-p1:transcript=PFIT_1411300.1:gene=PFIT_1411300:organism=Plasmodium_falciparum_IT:gene_product=conserved_Plasmodium_protein__unknown_function:transcript_product=conserved_Plasmodium_protein__unknown_function:location=PfIT_14_v3:434238-447453(-):protein_length=4340:sequence_SO=chromosome:SO=protein_coding_seq97	PFIT_1411300.1-p1	(2401, 2462)	PFIT_1411300.1-p1conserved_Plasmodium_protein__unknown_function	QNLESQRTLIMINKEDDIRDDKKKNEESEQNIEEYFCSKNNESSENNLNNSYACFMELNNNK
DD2var47_seq108	DD2var47	(2676, 2737)	var	YVPGSPKYKTLIEVVLEPSGNNTTASGKNTPSDTQNDIQNDGIPSSKITDNEWNTLKDEFIS
DD2var47_seq109	DD2var47	(2701, 2762)	var	SGKNTPSDTQNDIQNDGIPSSKITDNEWNTLKDEFISQYLQSEQPNDVPNDYTSGNSSTNTN
PFIT_0932200.1-p1:transcript=PFIT_0932200.1:gene=PFIT_0932200:organism=Plasmodium_falciparum_IT:gene_product=conserved_Plasmodium_protein__unknown_function:transcript_product=conserved_Plasmodium_protein__unknown_function:location=PfIT_09_v3:1249147-1251514(+):protein_length=687:sequence_SO=chromosome:SO=protein_coding_seq17	PFIT_0932200.1-p1	(401, 462)	PFIT_0932200.1-p1conserved_Plasmodium_protein__unknown_function	KDAFGYIDEVVEQYEQEEKNKNKNKNNGDENSVMEGNKNKEEENIVMEENKNKEEENIVMEE
PF3D7_0832400.1-p1:transcript=PF3D7_0832400.1:gene=PF3D7_0832400:organism=Plasmodium_falciparum_3D7:gene_product=stevor:transcript_product=stevor:location=Pf3D7_08_v3:1399560-1400583(-):protein_length=304:sequence_SO=chromosome:SO=protein_coding_seq4	PF3D7_0832400.1-p1	(76, 137)	Stevor	EAIKKYQQTHDPYEQLQELVEKKGTNPLGGHGVKPMSTIDKELLETYEEMFCDKSHIKSGMY
PF3D7_0832400.1-p1:transcript=PF3D7_0832400.1:gene=PF3D7_0832400:organism=Plasmodium_falciparum_3D7:gene_product=stevor:transcript_product=stevor:location=Pf3D7_08_v3:1399560-1400583(-):protein_length=304:sequence_SO=chromosome:SO=protein_coding_seq5	PF3D7_0832400.1-p1	(101, 162)	Stevor	NPLGGHGVKPMSTIDKELLETYEEMFCDKSHIKSGMYPNDDEGSDTSSRCECSDTNNTDLAK
PFIT_bin02100.1-p1:transcript=PFIT_bin02100.1:gene=PFIT_bin02100:organism=Plasmodium_falciparum_IT:gene_product=B_ITvar29_-_erythrocyte_membrane_protein_1__PfEMP1__putative:transcript_product=B_ITvar29_-_erythrocyte_membrane_protein_1__PfEMP1__putative:location=PfIT_bin_v3_archived_contig_6:2856-10980(+):protein_length=2189:sequence_SO=random_sequence:SO=protein_coding_seq18	PFIT_bin02100.1-p1	(426, 487)	var	KLNEEDVCKKVDDEEGGKINFAEKHDDNNNDKTKGTFYRSKYCQPCPDCGVKKVNNGNKWEE
PF3D7_1208200.1-p1:transcript=PF3D7_1208200.1:gene=PF3D7_1208200:organism=Plasmodium_falciparum_3D7:gene_product=cysteine_repeat_modular_protein_3:transcript_product=cysteine_repeat_modular_protein_3:location=Pf3D7_12_v3:376552-387483(+):protein_length=3525:sequence_SO=chromosome:SO=protein_coding_seq30	PF3D7_1208200.1-p1	(726, 787)	cysteine_repeat_modular_protein_3	ITFIKIEELSDIDIQYNEYDTTLYYGKKFSLDPLIKSPNINEFKMEQIDKFTNKIINTGLTI
DD2var23_seq65	DD2var23	(1601, 1662)	var	DCKSQPGQKQQPCVDNPSPSGENSILDDENLDQTTIEIPGVCNTVEEPEETTKDKKEPKKEQ
DD2var21_seq93	DD2var21	(2301, 2362)	var	TYQEPNEGTCIFKKGSLSSIGITTNQCESTGKDRLKMGDEWNCNGKTLDGQNKLCIPPRRKD
HB3var04_seq48	HB3var04	(1176, 1237)	var	PPKEINGKCDCKVTHRPQPPLAPPPPPPSRPQGESKHDHRGRNEPGGQGQRPARPSPPPDPR
PF3D7_0113100.1-p1:transcript=PF3D7_0113100.1:gene=PF3D7_0113100:organism=Plasmodium_falciparum_3D7:gene_product=surface-associated_interspersed_protein_1.1_(SURFIN_1.1):transcript_product=surface-associated_interspersed_protein_1.1_(SURFIN_1.1):location=Pf3D7_01_v3:495244-500076(+):protein_length=1555:sequence_SO=chromosome:SO=protein_coding_seq24	PF3D7_0113100.1-p1	(576, 637)	Surfin	YMYVWEEVEKDKWKSEKEMFIDTYINKLKDKKEYDEVEYDEKKNKELIKLLNDMKKMEILNT
PFIT_0203400.1-p1:transcript=PFIT_0203400.1:gene=PFIT_0203400:organism=Plasmodium_falciparum_IT:gene_product=conserved_Plasmodium_protein__unknown_function:transcript_product=conserved_Plasmodium_protein__unknown_function:location=PfIT_02_v3:127972-134805(-):protein_length=2277:sequence_SO=chromosome:SO=protein_coding_seq73	PFIT_0203400.1-p1	(1801, 1862)	PFIT_0203400.1-p1conserved_Plasmodium_protein__unknown_function	VQRDHVNRKENVNVKANANVKANANVKENANVKANANVKANANVKANANVKENANVKENANV
PF3D7_0914900.1-p1:transcript=PF3D7_0914900.1:gene=PF3D7_0914900:organism=Plasmodium_falciparum_3D7:gene_product=BSD-domain_protein__putative:transcript_product=BSD-domain_protein__putative:location=Pf3D7_09_v3:636621-638750(+):protein_length=709:sequence_SO=chromosome:SO=protein_coding_seq21	PF3D7_0914900.1-p1	(501, 562)	PF3D7_0914900.1-p1BSD-domain_protein__putative	KLNEESKYTNIKEDNEQNICPSDSNIYLKDISKIKIENNDFQKISEYNTKFLDEISEANRSA
PFIT_bin05800.1-p1:transcript=PFIT_bin05800.1:gene=PFIT_bin05800:organism=Plasmodium_falciparum_IT:gene_product=stevor:transcript_product=stevor:location=PfIT_bin_v3_archived_contig_11:33426-34423(-):protein_length=299:sequence_SO=random_sequence:SO=protein_coding_seq5	PFIT_bin05800.1-p1	(101, 162)	Stevor	KHVGGHAAESMSTIEKELLETYEERFGKESDMLKSGMSPNVDEKSSTCECTDINNIKLGKTK
PFIT_bin05800.1-p1:transcript=PFIT_bin05800.1:gene=PFIT_bin05800:organism=Plasmodium_falciparum_IT:gene_product=stevor:transcript_product=stevor:location=PfIT_bin_v3_archived_contig_11:33426-34423(-):protein_length=299:sequence_SO=random_sequence:SO=protein_coding_seq4	PFIT_bin05800.1-p1	(76, 137)	Stevor	EAIKKYQQTHDPYKQLKEVVEKNGAKHVGGHAAESMSTIEKELLETYEERFGKESDMLKSGM
PFIT_bin05800.1-p1:transcript=PFIT_bin05800.1:gene=PFIT_bin05800:organism=Plasmodium_falciparum_IT:gene_product=stevor:transcript_product=stevor:location=PfIT_bin_v3_archived_contig_11:33426-34423(-):protein_length=299:sequence_SO=random_sequence:SO=protein_coding_seq3	PFIT_bin05800.1-p1	(51, 112)	Stevor	AQTQIHNPHYHNDPELKEIIDKMNEEAIKKYQQTHDPYKQLKEVVEKNGAKHVGGHAAESMS
PF3D7_1416600.1-p1:transcript=PF3D7_1416600.1:gene=PF3D7_1416600:organism=Plasmodium_falciparum_3D7:gene_product=conserved_Plasmodium_protein__unknown_function:transcript_product=conserved_Plasmodium_protein__unknown_function:location=Pf3D7_14_v3:669692-678772(-):protein_length=3026:sequence_SO=chromosome:SO=protein_coding_seq45	PF3D7_1416600.1-p1	(1101, 1162)	PF3D7_1416600.1-p1conserved_Plasmodium_protein__unknown_function	NKIHYPSPNKLKKMNSIHNTQETEKLRKLKNNNGNKCTYEKGEEKNKNFCSQSRNNSLTSFR
PF3D7_1416600.1-p1:transcript=PF3D7_1416600.1:gene=PF3D7_1416600:organism=Plasmodium_falciparum_3D7:gene_product=conserved_Plasmodium_protein__unknown_function:transcript_product=conserved_Plasmodium_protein__unknown_function:location=Pf3D7_14_v3:669692-678772(-):protein_length=3026:sequence_SO=chromosome:SO=protein_coding_seq46	PF3D7_1416600.1-p1	(1126, 1187)	PF3D7_1416600.1-p1conserved_Plasmodium_protein__unknown_function	LRKLKNNNGNKCTYEKGEEKNKNFCSQSRNNSLTSFRNKNDKNIKKNVLTKKDSILNQDKIN
PF3D7_1330800.1-p1:transcript=PF3D7_1330800.1:gene=PF3D7_1330800:organism=Plasmodium_falciparum_3D7:gene_product=RNA-binding_protein__putative:transcript_product=RNA-binding_protein__putative:location=Pf3D7_13_v3:1294615-1296966(+):protein_length=596:sequence_SO=chromosome:SO=protein_coding_seq4	PF3D7_1330800.1-p1	(76, 137)	PF3D7_1330800.1-p1RNA-binding_protein__putative	DSSSDSDDDSEEDNKIEIKNENKKENKKENKNENKNENKNENKNESKKENKKEVKKDDSSSD
PF3D7_1330800.1-p1:transcript=PF3D7_1330800.1:gene=PF3D7_1330800:organism=Plasmodium_falciparum_3D7:gene_product=RNA-binding_protein__putative:transcript_product=RNA-binding_protein__putative:location=Pf3D7_13_v3:1294615-1296966(+):protein_length=596:sequence_SO=chromosome:SO=protein_coding_seq5	PF3D7_1330800.1-p1	(101, 162)	PF3D7_1330800.1-p1RNA-binding_protein__putative	NKKENKNENKNENKNENKNESKKENKKEVKKDDSSSDSDSSSDSDDSDDSDSDEVEEKKEKE
PFCLINvar09_seq20	PFCLINvar09	(476, 537)	var	DDKCNIKLYKPKNGEQGTEIKILKSGEEPTEIGKKLNEFCDGKNGESLYDPWKCYKEDDIEE
PF3D7_1025000.1-p1:transcript=PF3D7_1025000.1:gene=PF3D7_1025000:organism=Plasmodium_falciparum_3D7:gene_product=formin_2__putative:transcript_product=formin_2__putative:location=Pf3D7_10_v3:1045608-1049760(-):protein_length=980:sequence_SO=chromosome:SO=protein_coding_seq16	PF3D7_1025000.1-p1	(376, 437)	PF3D7_1025000.1-p1formin_2__putative	EGYDQMNNDDLNNVDHLGFNDGYDKFRQGHVVDKDLNSTNEKKKKKMKKNKKSYTNIELNHK
PF3D7_1025000.1-p1:transcript=PF3D7_1025000.1:gene=PF3D7_1025000:organism=Plasmodium_falciparum_3D7:gene_product=formin_2__putative:transcript_product=formin_2__putative:location=Pf3D7_10_v3:1045608-1049760(-):protein_length=980:sequence_SO=chromosome:SO=protein_coding_seq14	PF3D7_1025000.1-p1	(326, 387)	PF3D7_1025000.1-p1formin_2__putative	GKKESIHFGDDEENDDKNGDNNKNDDNDEDDDNDDDNFHNNDKQFFSTNFEGYDQMNNDDLN
PF3D7_1303800.1-p1:transcript=PF3D7_1303800.1:gene=PF3D7_1303800:organism=Plasmodium_falciparum_3D7:gene_product=conserved_Plasmodium_protein__unknown_function:transcript_product=conserved_Plasmodium_protein__unknown_function:location=Pf3D7_13_v3:184845-212660(-):protein_length=9271:sequence_SO=chromosome:SO=protein_coding_seq243	PF3D7_1303800.1-p1	(6051, 6112)	PF3D7_1303800.1-p1conserved_Plasmodium_protein__unknown_function	INYGDNINNGDNINNGDNINNGDNINYCDNINYCDNINYGDNINYGDNINYGDNINYGDNIN
PFIT_1320300.1-p1:transcript=PFIT_1320300.1:gene=PFIT_1320300:organism=Plasmodium_falciparum_IT:gene_product=conserved_Plasmodium_protein__unknown_function:transcript_product=conserved_Plasmodium_protein__unknown_function:location=PfIT_13_v3:828868-838545(-):protein_length=3042:sequence_SO=chromosome:SO=protein_coding_seq6	PFIT_1320300.1-p1	(126, 187)	PFIT_1320300.1-p1conserved_Plasmodium_protein__unknown_function	NISNTFTNIKIQKLKDKHNKKNSDIKNVSTDKKKENDNNKNNNNKKNNKKIPIIYIPFNDIK
PFIT_1321400.1-p1:transcript=PFIT_1321400.1:gene=PFIT_1321400:organism=Plasmodium_falciparum_IT:gene_product=conserved_Plasmodium_protein__unknown_function:transcript_product=conserved_Plasmodium_protein__unknown_function:location=PfIT_13_v3:896848-909389(+):protein_length=3457:sequence_SO=chromosome:SO=protein_coding_seq129	PFIT_1321400.1-p1	(3201, 3262)	PFIT_1321400.1-p1conserved_Plasmodium_protein__unknown_function	RSNKSNVQNLIKKYDNRRESPNVSHKTANSIKPKTHLENTKIVNKANDTFLQVQGQRNISNT
PFIT_1437400.1-p1:transcript=PFIT_1437400.1:gene=PFIT_1437400:organism=Plasmodium_falciparum_IT:gene_product=conserved_Plasmodium_protein__unknown_function:transcript_product=conserved_Plasmodium_protein__unknown_function:location=PfIT_14_v3:1493421-1500191(-):protein_length=2256:sequence_SO=chromosome:SO=protein_coding_seq87	PFIT_1437400.1-p1	(2151, 2212)	PFIT_1437400.1-p1conserved_Plasmodium_protein__unknown_function	NQVYQKEYDKPNVTKYQLKVKKITFNSKNQSKQINNTIFNNLDLYNNKNYDYFYYNKNCNLE
PF3D7_1150400.1-p1:transcript=PF3D7_1150400.1:gene=PF3D7_1150400:organism=Plasmodium_falciparum_3D7:gene_product=erythrocyte_membrane_protein_1__PfEMP1:transcript_product=erythrocyte_membrane_protein_1__PfEMP1:location=Pf3D7_11_v3:2025817-2035886(+):protein_length=3119:sequence_SO=chromosome:SO=protein_coding_seq117	PF3D7_1150400.1-p1	(2901, 2962)	var	GDEISYNINMSTNTNNDIPKYVSNNVYSGIDLINDTLSGNQHIDIYDELLKRKENELFGTNY
PFIT_1205900.1-p1:transcript=PFIT_1205900.1:gene=PFIT_1205900:organism=Plasmodium_falciparum_IT:gene_product=conserved_Plasmodium_protein__unknown_function:transcript_product=conserved_Plasmodium_protein__unknown_function:location=PfIT_12_v3:235692-244031(-):protein_length=2779:sequence_SO=chromosome:SO=protein_coding_seq83	PFIT_1205900.1-p1	(2051, 2112)	PFIT_1205900.1-p1conserved_Plasmodium_protein__unknown_function	KKEEEKKKMEEEKKKMEEEKKKKEEEKKKKEEEKKKEEMELLEYERIQEEIKFLEEMKEKEH
PFIT_1323000.1-p1:transcript=PFIT_1323000.1:gene=PFIT_1323000:organism=Plasmodium_falciparum_IT:gene_product=vacuolar_protein_sorting-associated_protein_52__putative:transcript_product=vacuolar_protein_sorting-associated_protein_52__putative:location=PfIT_13_v3:950027-953881(-):protein_length=1284:sequence_SO=chromosome:SO=protein_coding_seq40	PFIT_1323000.1-p1	(976, 1037)	PFIT_1323000.1-p1vacuolar_protein_sorting-associated_protein_52__putative	NEQFKEDIIMENLYDKNVNFVKHNNEGIEKNKDESKITTEKRKHNNNNICAHSNENSYLNKI
PF3D7_1148000.1-p1:transcript=PF3D7_1148000.1:gene=PF3D7_1148000:organism=Plasmodium_falciparum_3D7:gene_product=serine/threonine_protein_kinase__putative:transcript_product=serine/threonine_protein_kinase__putative:location=Pf3D7_11_v3:1909210-1913499(-):protein_length=1429:sequence_SO=chromosome:SO=protein_coding_seq32	PF3D7_1148000.1-p1	(776, 837)	PF3D7_1148000.1-p1serine/threonine_protein_kinase__putative	KNLNEEKHASQRIGKNEKEHIIKTNAQKEKEKEKENKISNIKEKQTPKDNNANKNDNINKEY
PFIT_1100400.1-p1:transcript=PFIT_1100400.1:gene=PFIT_1100400:organism=Plasmodium_falciparum_IT:gene_product=rifin:transcript_product=rifin:location=PfIT_11_v3:9644-10912(-):protein_length=346:sequence_SO=chromosome:SO=protein_coding_seq7	PFIT_1100400.1-p1	(151, 212)	rifin	GAIAPWWGLVCGVGYAGWTNYVATTIAKMATDAGIEAGVKVGLAKVTEIVTKLLTDSAHKVP
PFIT_0920000.1-p1:transcript=PFIT_0920000.1:gene=PFIT_0920000:organism=Plasmodium_falciparum_IT:gene_product=regulator_of_chromosome_condensation__putative:transcript_product=regulator_of_chromosome_condensation__putative:location=PfIT_09_v3:790912-800562(-):protein_length=3216:sequence_SO=chromosome:SO=protein_coding_seq22	PFIT_0920000.1-p1	(526, 587)	PFIT_0920000.1-p1regulator_of_chromosome_condensation__putative	VSDEVKGNDQNDLEKLNMDEMKIEKIDTKGDGDKIKDGDKIKDGDKIKDGDDIKDGDKIKYG
PFIT_0920000.1-p1:transcript=PFIT_0920000.1:gene=PFIT_0920000:organism=Plasmodium_falciparum_IT:gene_product=regulator_of_chromosome_condensation__putative:transcript_product=regulator_of_chromosome_condensation__putative:location=PfIT_09_v3:790912-800562(-):protein_length=3216:sequence_SO=chromosome:SO=protein_coding_seq25	PFIT_0920000.1-p1	(601, 662)	PFIT_0920000.1-p1regulator_of_chromosome_condensation__putative	NIKDGDKIKYGDGKNNVVVNLSDKNIDSSDVKSANDTYSQKSEKNIHNKKIDDIFKESNTQF
PFIT_0920000.1-p1:transcript=PFIT_0920000.1:gene=PFIT_0920000:organism=Plasmodium_falciparum_IT:gene_product=regulator_of_chromosome_condensation__putative:transcript_product=regulator_of_chromosome_condensation__putative:location=PfIT_09_v3:790912-800562(-):protein_length=3216:sequence_SO=chromosome:SO=protein_coding_seq24	PFIT_0920000.1-p1	(576, 637)	PFIT_0920000.1-p1regulator_of_chromosome_condensation__putative	DDIKDGDKIKYGDNINDDDNTNDDDNIKDGDKIKYGDGKNNVVVNLSDKNIDSSDVKSANDT
PFIT_1008000.1-p1:transcript=PFIT_1008000.1:gene=PFIT_1008000:organism=Plasmodium_falciparum_IT:gene_product=conserved_Plasmodium_membrane_protein__unknown_function:transcript_product=conserved_Plasmodium_membrane_protein__unknown_function:location=PfIT_10_v3:289305-293189(+):protein_length=1294:sequence_SO=chromosome:SO=protein_coding_seq38	PFIT_1008000.1-p1	(926, 987)	PFIT_1008000.1-p1conserved_Plasmodium_membrane_protein__unknown_function	INNDDAKNNDDSKNNDDAKNNDDAKNNDDDINNDDGKNDDDNNIISTKNNIHFNEKNIKHCE
PF3D7_0101000.1-p1:transcript=PF3D7_0101000.1:gene=PF3D7_0101000:organism=Plasmodium_falciparum_3D7:gene_product=rifin:transcript_product=rifin:location=Pf3D7_01_v3:65817-66989(-):protein_length=358:sequence_SO=chromosome:SO=protein_coding_seq4	PF3D7_0101000.1-p1	(76, 137)	rifin	TSQRFEEYNERLLENKQKCKEQCEKDIQKIILKDKLEKELMDKFATLHTDIQSDAIPTCVCE
PF3D7_0912500.1-p1:transcript=PF3D7_0912500.1:gene=PF3D7_0912500:organism=Plasmodium_falciparum_3D7:gene_product=SAP_domain-containing_protein__putative:transcript_product=SAP_domain-containing_protein__putative:location=Pf3D7_09_v3:556090-557958(+):protein_length=288:sequence_SO=chromosome:SO=protein_coding_seq7	PF3D7_0912500.1-p1	(151, 212)	PF3D7_0912500.1-p1SAP_domain-containing_protein__putative	NDHKNNPNKDSNDQKSKIVIQEITFNDVSSSSQNTLQRNIISTDDNDSYLSEEKKRELRRKR
IGHvar34_seq58	IGHvar34	(1426, 1487)	var	GDNSHTLEEFTTRPQFLRWMTEWGEHFCREHKVEKGKLAAKCGDCAVDPDDGSKCDGECGEC
IGHvar34_seq53	IGHvar34	(1301, 1362)	var	KKKEQKTGTTTKPDEVVQIQLESGTIPDDFKRRMFYTFGDYRDLCIGTDISSKKVTTVGVGK
PFIT_1024300.1-p1:transcript=PFIT_1024300.1:gene=PFIT_1024300:organism=Plasmodium_falciparum_IT:gene_product=conserved_Plasmodium_protein__unknown_function:transcript_product=conserved_Plasmodium_protein__unknown_function:location=PfIT_10_v3:970992-975185(+):protein_length=1397:sequence_SO=chromosome:SO=protein_coding_seq50	PFIT_1024300.1-p1	(1226, 1287)	PFIT_1024300.1-p1conserved_Plasmodium_protein__unknown_function	KDVDDNGPNDPFYDGTFNVLNNDIKENEQDADIIAQGSSGQTQEYIKDVENNVERNNENNIK
PFCLINvar43_seq45	PFCLINvar43	(1101, 1162)	var	NSDDPQSPQSKLEKGEIPPDFLRQMFYTLGDYRDILMGNTDMVGDTIVTTKDSGGSSETKKI
PF3D7_1240300.1-p1:transcript=PF3D7_1240300.1:gene=PF3D7_1240300:organism=Plasmodium_falciparum_3D7:gene_product=erythrocyte_membrane_protein_1__PfEMP1:transcript_product=erythrocyte_membrane_protein_1__PfEMP1:location=Pf3D7_12_v3:1694150-1703087(+):protein_length=2646:sequence_SO=chromosome:SO=protein_coding_seq105	PF3D7_1240300.1-p1	(2601, 2662)	var	EKYNEPYYYDMYDDDIYYDVNDHDASTVDSNNMDVPSKVQIEMDVNTKLVKEKYPIADVWDI
PF3D7_1240300.1-p1:transcript=PF3D7_1240300.1:gene=PF3D7_1240300:organism=Plasmodium_falciparum_3D7:gene_product=erythrocyte_membrane_protein_1__PfEMP1:transcript_product=erythrocyte_membrane_protein_1__PfEMP1:location=Pf3D7_12_v3:1694150-1703087(+):protein_length=2646:sequence_SO=chromosome:SO=protein_coding_seq104	PF3D7_1240300.1-p1	(2576, 2637)	var	SMDTILEDLEKYNEPYYYDMYDDDIYYDVNDHDASTVDSNNMDVPSKVQIEMDVNTKLVKEK
PF3D7_1240300.1-p1:transcript=PF3D7_1240300.1:gene=PF3D7_1240300:organism=Plasmodium_falciparum_3D7:gene_product=erythrocyte_membrane_protein_1__PfEMP1:transcript_product=erythrocyte_membrane_protein_1__PfEMP1:location=Pf3D7_12_v3:1694150-1703087(+):protein_length=2646:sequence_SO=chromosome:SO=protein_coding_seq102	PF3D7_1240300.1-p1	(2526, 2587)	var	HPSDSNKTLNTDVSIQIHMDNPKPINEFTYVDSNPNQVDDTYVDSNPDNSSMDTILEDLEKY
PFIT_0604900.1-p1:transcript=PFIT_0604900.1:gene=PFIT_0604900:organism=Plasmodium_falciparum_IT:gene_product=conserved_Plasmodium_protein__unknown_function:transcript_product=conserved_Plasmodium_protein__unknown_function:location=PfIT_06_v3:192936-196130(-):protein_length=1064:sequence_SO=chromosome:SO=protein_coding_seq7	PFIT_0604900.1-p1	(151, 212)	PFIT_0604900.1-p1conserved_Plasmodium_protein__unknown_function	YISCTDVMNSEKTRNSDNFNNSYITSSANNNVVSKSGSYKCDAENNNTNMKDLSDINNNNNN
PF3D7_1116000.1-p1:transcript=PF3D7_1116000.1:gene=PF3D7_1116000:organism=Plasmodium_falciparum_3D7:gene_product=rhoptry_neck_protein_4:transcript_product=rhoptry_neck_protein_4:location=Pf3D7_11_v3:602983-606918(-):protein_length=1201:sequence_SO=chromosome:SO=protein_coding_seq21	PF3D7_1116000.1-p1	(501, 562)	rhoptry_neck_protein_4	ATTNESTHNEHATTTTNEPTHNEHSTTPTNESTHSENATTSTNEQHSHDQNTEVHPNDKLAL
PF3D7_1116000.1-p1:transcript=PF3D7_1116000.1:gene=PF3D7_1116000:organism=Plasmodium_falciparum_3D7:gene_product=rhoptry_neck_protein_4:transcript_product=rhoptry_neck_protein_4:location=Pf3D7_11_v3:602983-606918(-):protein_length=1201:sequence_SO=chromosome:SO=protein_coding_seq20	PF3D7_1116000.1-p1	(476, 537)	rhoptry_neck_protein_4	TTNEPTHNEHATTTTNEPIHNEHATATTNESTHNEHATTTTNEPTHNEHSTTPTNESTHSEN
PFIT_1325000.1-p1:transcript=PFIT_1325000.1:gene=PFIT_1325000:organism=Plasmodium_falciparum_IT:gene_product=conserved_Plasmodium_protein__unknown_function:transcript_product=conserved_Plasmodium_protein__unknown_function:location=PfIT_13_v3:1035791-1040275(+):protein_length=1494:sequence_SO=chromosome:SO=protein_coding_seq36	PFIT_1325000.1-p1	(876, 937)	PFIT_1325000.1-p1conserved_Plasmodium_protein__unknown_function	INNYMINKYNNDIYQDIISCDQGSEHGKEDTCNNIERFYNDNVKMKNTYNYKKRPYNYATDI
PF3D7_1318400.1-p1:transcript=PF3D7_1318400.1:gene=PF3D7_1318400:organism=Plasmodium_falciparum_3D7:gene_product=structural_maintenance_of_chromosomes_protein_2__putative:transcript_product=structural_maintenance_of_chromosomes_protein_2__putative:location=Pf3D7_13_v3:760326-764139(-):protein_length=1218:sequence_SO=chromosome:SO=protein_coding_seq11	PF3D7_1318400.1-p1	(251, 312)	PF3D7_1318400.1-p1structural_maintenance_of_chromosomes_protein_2__putative	EEKIEDAKSEEKILEKGIKEIDKDIEKYKIEKEKIVKETNTASEPMKILISQKEELEKKISQ
PFIT_1120800.1-p1:transcript=PFIT_1120800.1:gene=PFIT_1120800:organism=Plasmodium_falciparum_IT:gene_product=conserved_Plasmodium_protein__unknown_function:transcript_product=conserved_Plasmodium_protein__unknown_function:location=PfIT_11_v3:688529-692736(+):protein_length=1060:sequence_SO=chromosome:SO=protein_coding_seq28	PFIT_1120800.1-p1	(676, 737)	PFIT_1120800.1-p1conserved_Plasmodium_protein__unknown_function	EKNTEHKKEETEKKKFIPKRVIMYQQELKEKEERNLKLLEQQRKEREMRLQLIRSKTQGTSS
IT4var29_seq53	IT4var29	(1301, 1362)	var	KHCSNDQNSGEKGTEDKKNNKIDFENITQTFSRSTYCKTCPPNKVSCNVIRGTNHCTPVNGN
DD2var52_seq97	DD2var52	(2401, 2462)	var	FMSDTTDITSSESEYEELDINDIYVPGSPKYKTLIEVVLEPSKSNGNTPSKGDGNTLGDDMV
DD2var52_seq99	DD2var52	(2451, 2512)	var	KGDGNTLGDDMVPTTNTFTDEEWNELKHDFISQYIQSRLPMDVPQYDVSTELPMNIVGNVLD
PF3D7_0425800.1-p1:transcript=PF3D7_0425800.1:gene=PF3D7_0425800:organism=Plasmodium_falciparum_3D7:gene_product=erythrocyte_membrane_protein_1__PfEMP1:transcript_product=erythrocyte_membrane_protein_1__PfEMP1:location=Pf3D7_04_v3:1156423-1167821(+):protein_length=3553:sequence_SO=chromosome:SO=protein_coding_seq98	PF3D7_0425800.1-p1	(2426, 2487)	var	SENPQKKLEGGEIPEDFKRQMFYTLGDYRDILVGDKTMIEALEKSGDTKIEDISEKIPKILD
PF3D7_0425800.1-p1:transcript=PF3D7_0425800.1:gene=PF3D7_0425800:organism=Plasmodium_falciparum_3D7:gene_product=erythrocyte_membrane_protein_1__PfEMP1:transcript_product=erythrocyte_membrane_protein_1__PfEMP1:location=Pf3D7_04_v3:1156423-1167821(+):protein_length=3553:sequence_SO=chromosome:SO=protein_coding_seq90	PF3D7_0425800.1-p1	(2226, 2287)	var	KQGSAPTATTPTVEDICATVAKALKGDKSLNAACALKYGKNNSRLGWKCIPTSGDKTDTSEN
PF3D7_0425800.1-p1:transcript=PF3D7_0425800.1:gene=PF3D7_0425800:organism=Plasmodium_falciparum_3D7:gene_product=erythrocyte_membrane_protein_1__PfEMP1:transcript_product=erythrocyte_membrane_protein_1__PfEMP1:location=Pf3D7_04_v3:1156423-1167821(+):protein_length=3553:sequence_SO=chromosome:SO=protein_coding_seq97	PF3D7_0425800.1-p1	(2401, 2462)	var	KYKVDKEIEEKEKQAAQNHLVQRKTSENPQKKLEGGEIPEDFKRQMFYTLGDYRDILVGDKT
PF3D7_0216000.1-p1:transcript=PF3D7_0216000.1:gene=PF3D7_0216000:organism=Plasmodium_falciparum_3D7:gene_product=DEAD/DEAH_box_helicase__putative:transcript_product=DEAD/DEAH_box_helicase__putative:location=Pf3D7_02_v3:658636-664629(+):protein_length=1997:sequence_SO=chromosome:SO=protein_coding_seq65	PF3D7_0216000.1-p1	(1601, 1662)	PF3D7_0216000.1-p1DEAD/DEAH_box_helicase__putative	QRDRNKEEDQDEDKDDDKDKDKDKDKEEEEEKKRKHILNNNNNNGIQNGSSINEGVKEKILD
PF3D7_0216000.1-p1:transcript=PF3D7_0216000.1:gene=PF3D7_0216000:organism=Plasmodium_falciparum_3D7:gene_product=DEAD/DEAH_box_helicase__putative:transcript_product=DEAD/DEAH_box_helicase__putative:location=Pf3D7_02_v3:658636-664629(+):protein_length=1997:sequence_SO=chromosome:SO=protein_coding_seq69	PF3D7_0216000.1-p1	(1701, 1762)	PF3D7_0216000.1-p1DEAD/DEAH_box_helicase__putative	EECDVDNIIQNKNNKRLKMECQKDDKDDDINSNIHMDEKKKIYMSSEKDDTTKEYSDTHDPY
PF3D7_1312700.1-p1:transcript=PF3D7_1312700.1:gene=PF3D7_1312700:organism=Plasmodium_falciparum_3D7:gene_product=conserved_Plasmodium_protein__unknown_function:transcript_product=conserved_Plasmodium_protein__unknown_function:location=Pf3D7_13_v3:532270-533958(-):protein_length=562:sequence_SO=chromosome:SO=protein_coding_seq10	PF3D7_1312700.1-p1	(226, 287)	PF3D7_1312700.1-p1conserved_Plasmodium_protein__unknown_function	KIDNNDKIDNIDKNDNNDKNDNIDKNVNIDKNVNIDKIDNIHKNDNIHKNDNNDKIGIHHMI
PFIT_1465600.1-p1:transcript=PFIT_1465600.1:gene=PFIT_1465600:organism=Plasmodium_falciparum_IT:gene_product=conserved_Plasmodium_membrane_protein__unknown_function:transcript_product=conserved_Plasmodium_membrane_protein__unknown_function:location=PfIT_14_v3:2630901-2641234(+):protein_length=3256:sequence_SO=chromosome:SO=protein_coding_seq106	PFIT_1465600.1-p1	(2626, 2687)	PFIT_1465600.1-p1conserved_Plasmodium_membrane_protein__unknown_function	SNQLKEENNVQYSLEGEKKKTQDELKDDEQEKHENMNEEEHNNLFSMKKNNLFFNMKEKFLK
PFIT_0419300.1-p1:transcript=PFIT_0419300.1:gene=PFIT_0419300:organism=Plasmodium_falciparum_IT:gene_product=erythrocyte_membrane_protein_1__PfEMP1:transcript_product=erythrocyte_membrane_protein_1__PfEMP1:location=PfIT_04_v3:960583-967294(-):protein_length=2152:sequence_SO=chromosome:SO=protein_coding_seq1	PFIT_0419300.1-p1	(1, 62)	var	MVPPGGRQGGSGEDGIDDKDAKHVLDEIGEKVYKEKVKKDDAKTYKEALKGNLASATNRSVE
PF3D7_1038400.1-p1:transcript=PF3D7_1038400.1:gene=PF3D7_1038400:organism=Plasmodium_falciparum_3D7:gene_product=gametocyte-specific_protein:transcript_product=gametocyte-specific_protein:location=Pf3D7_10_v3:1519021-1547825(+):protein_length=9563:sequence_SO=chromosome:SO=protein_coding_seq59	PF3D7_1038400.1-p1	(1451, 1512)	gametocyte-specific_protein	LVEEVVPEELVEDVIPEELIAEVVSEELVEEEIPEEVLEEVIPEELVEEVIPEELVEEVIPE
PF3D7_1036400.1-p1:transcript=PF3D7_1036400.1:gene=PF3D7_1036400:organism=Plasmodium_falciparum_3D7:gene_product=liver_stage_antigen_1:transcript_product=liver_stage_antigen_1:location=Pf3D7_10_v3:1436316-1439804(+):protein_length=1162:sequence_SO=chromosome:SO=protein_coding_seq11	PF3D7_1036400.1-p1	(251, 312)	liver_stage_antigen_1	LEQERRAKEKLQEQQSDLEQERLAKEKLQEQQSDLEQERLAKEKLQEQQSDLEQERLAKEKL
MAL6P1.4_D11_seq12	MAL6P1.4_D11	(276, 337)	var	TLSGNAHIDIYDELLKRKENELFGTNHVKHTSTHSVAKHTNSDPIHNQLNLFHTWLDRHRDM
PF3D7_1026300.1-p1:transcript=PF3D7_1026300.1:gene=PF3D7_1026300:organism=Plasmodium_falciparum_3D7:gene_product=conserved_Plasmodium_protein__unknown_function:transcript_product=conserved_Plasmodium_protein__unknown_function:location=Pf3D7_10_v3:1106086-1109451(+):protein_length=1121:sequence_SO=chromosome:SO=protein_coding_seq41	PF3D7_1026300.1-p1	(1001, 1062)	PF3D7_1026300.1-p1conserved_Plasmodium_protein__unknown_function	KTNKEKTHHIKNKIYKNQLNYRNYYMSEKDNNIQYIKGGNEKNENDEKFYNNYKHFNMSRLS
PF3D7_1036400.1-p1:transcript=PF3D7_1036400.1:gene=PF3D7_1036400:organism=Plasmodium_falciparum_3D7:gene_product=liver_stage_antigen_1:transcript_product=liver_stage_antigen_1:location=Pf3D7_10_v3:1436316-1439804(+):protein_length=1162:sequence_SO=chromosome:SO=protein_coding_seq10	PF3D7_1036400.1-p1	(226, 287)	liver_stage_antigen_1	KLQEQQSDLERTKTSKEKLHEQQSDLEQERRAKEKLQEQQSDLEQERLAKEKLQEQQSDLEQ
PF3D7_1036400.1-p1:transcript=PF3D7_1036400.1:gene=PF3D7_1036400:organism=Plasmodium_falciparum_3D7:gene_product=liver_stage_antigen_1:transcript_product=liver_stage_antigen_1:location=Pf3D7_10_v3:1436316-1439804(+):protein_length=1162:sequence_SO=chromosome:SO=protein_coding_seq17	PF3D7_1036400.1-p1	(401, 462)	liver_stage_antigen_1	QSDLEQERRAKEKLQEQQSDLEQERRAKEKLQEQQSDLEQERRAKEKLQEQQSDLEQERLAK
PF3D7_0709300.1-p1:transcript=PF3D7_0709300.1:gene=PF3D7_0709300:organism=Plasmodium_falciparum_3D7:gene_product=Cg2_protein__putative:transcript_product=Cg2_protein__putative:location=Pf3D7_07_v3:413560-421749(-):protein_length=2729:sequence_SO=chromosome:SO=protein_coding_seq91	PF3D7_0709300.1-p1	(2251, 2312)	PF3D7_0709300.1-p1Cg2_protein__putative	NKMNGDNKMNGDNKMNGDNKMNGDNKMNGDNKMNGDNKMNGDNKMNGDNKMNGDNKMNGDNK
PF3D7_0709300.1-p1:transcript=PF3D7_0709300.1:gene=PF3D7_0709300:organism=Plasmodium_falciparum_3D7:gene_product=Cg2_protein__putative:transcript_product=Cg2_protein__putative:location=Pf3D7_07_v3:413560-421749(-):protein_length=2729:sequence_SO=chromosome:SO=protein_coding_seq90	PF3D7_0709300.1-p1	(2226, 2287)	PF3D7_0709300.1-p1Cg2_protein__putative	VGEEVDEEDAWFYCLQKKKKINGDDNKMNGDNKMNGDNKMNGDNKMNGDNKMNGDNKMNGDN
PF3D7_0709300.1-p1:transcript=PF3D7_0709300.1:gene=PF3D7_0709300:organism=Plasmodium_falciparum_3D7:gene_product=Cg2_protein__putative:transcript_product=Cg2_protein__putative:location=Pf3D7_07_v3:413560-421749(-):protein_length=2729:sequence_SO=chromosome:SO=protein_coding_seq92	PF3D7_0709300.1-p1	(2276, 2337)	PF3D7_0709300.1-p1Cg2_protein__putative	KMNGDNKMNGDNKMNGDNKMNGDNKMNGDNKMNGDNKMNGDNKMNGDNKMNGDDNKINGDDN
PF3D7_1036400.1-p1:transcript=PF3D7_1036400.1:gene=PF3D7_1036400:organism=Plasmodium_falciparum_3D7:gene_product=liver_stage_antigen_1:transcript_product=liver_stage_antigen_1:location=Pf3D7_10_v3:1436316-1439804(+):protein_length=1162:sequence_SO=chromosome:SO=protein_coding_seq15	PF3D7_1036400.1-p1	(351, 412)	liver_stage_antigen_1	SDLEQDRLAKEKLQEQQSDLEQERLAKEKLQEQQSDLEQERRAKEKLQEQQSDLEQERRAKE
PFIT_0104200.1-p1:transcript=PFIT_0104200.1:gene=PFIT_0104200:organism=Plasmodium_falciparum_IT:gene_product=asparagine-rich_antigen_Pfa35-2:transcript_product=asparagine-rich_antigen_Pfa35-2:location=PfIT_01_v3:180325-189549(+):protein_length=3074:sequence_SO=chromosome:SO=protein_coding_seq43	PFIT_0104200.1-p1	(1051, 1112)	asparagine-rich_antigen_Pfa35-2	KDHNQDKDHNQDKDHNQDQNQDQNEDSIIKNNHIISIEDDKKECEIYYHRDNNIINFDKTDN
PF3D7_1222400.1-p1:transcript=PF3D7_1222400.1:gene=PF3D7_1222400:organism=Plasmodium_falciparum_3D7:gene_product=AP2_domain_transcription_factor:transcript_product=AP2_domain_transcription_factor:location=Pf3D7_12_v3:890581-898257(+):protein_length=2558:sequence_SO=chromosome:SO=protein_coding_seq85	PF3D7_1222400.1-p1	(2101, 2162)	PF3D7_1222400.1-p1AP2_domain_transcription_factor	NNTDNFSEKNIEHIYLNTQHNYINTNQGPLIPYEQENNNNEETQKKRKKKKQIPQMLEINKN
PF3D7_1201100.1-p1:transcript=PF3D7_1201100.1:gene=PF3D7_1201100:organism=Plasmodium_falciparum_3D7:gene_product=RESA-like_protein_with_PHIST_and_DnaJ_domains:transcript_product=RESA-like_protein_with_PHIST_and_DnaJ_domains:location=Pf3D7_12_v3:81449-84451(-):protein_length=900:sequence_SO=chromosome:SO=protein_coding_seq18	PF3D7_1201100.1-p1	(426, 487)	RESA-like_protein_with_PHIST_and_DnaJ_domains	RMSERLKELREYEKRKKEKEQNNSKYVFDYGSFEEKSESEKSLDISKNFIFSEEVRSTNSGM
PFIT_0323300.1-p1:transcript=PFIT_0323300.1:gene=PFIT_0323300:organism=Plasmodium_falciparum_IT:gene_product=conserved_Plasmodium_protein__unknown_function:transcript_product=conserved_Plasmodium_protein__unknown_function:location=PfIT_03_v3:918480-919808(+):protein_length=442:sequence_SO=chromosome:SO=protein_coding_seq10	PFIT_0323300.1-p1	(226, 287)	PFIT_0323300.1-p1conserved_Plasmodium_protein__unknown_function	MVVKKKKKKIINNDNIKGDVLQSDDIKGDILQSDSICPSSTNNINSVGYNSVINSFLFYIRS
PFIT_0219400.1-p1:transcript=PFIT_0219400.1:gene=PFIT_0219400:organism=Plasmodium_falciparum_IT:gene_product=liver_stage_antigen_3:transcript_product=liver_stage_antigen_3:location=PfIT_02_v3:741166-745148(+):protein_length=1274:sequence_SO=chromosome:SO=protein_coding_seq12	PFIT_0219400.1-p1	(276, 337)	liver_stage_antigen_3	EENVAPTVEEIVAPTVEEIVAPSVEESVAENVATNLSDNLLSNLLGGIETEEIKDSILNEIE
PFIT_0219400.1-p1:transcript=PFIT_0219400.1:gene=PFIT_0219400:organism=Plasmodium_falciparum_IT:gene_product=liver_stage_antigen_3:transcript_product=liver_stage_antigen_3:location=PfIT_02_v3:741166-745148(+):protein_length=1274:sequence_SO=chromosome:SO=protein_coding_seq11	PFIT_0219400.1-p1	(251, 312)	liver_stage_antigen_3	DDGSVASSVEESIASSVDESIDSSIEENVAPTVEEIVAPTVEEIVAPSVEESVAENVATNLS
PFIT_0219400.1-p1:transcript=PFIT_0219400.1:gene=PFIT_0219400:organism=Plasmodium_falciparum_IT:gene_product=liver_stage_antigen_3:transcript_product=liver_stage_antigen_3:location=PfIT_02_v3:741166-745148(+):protein_length=1274:sequence_SO=chromosome:SO=protein_coding_seq17	PFIT_0219400.1-p1	(401, 462)	liver_stage_antigen_3	EEEKKEVIDVIEEVKEEVATTLIETVEQAEEKSANTITEIFENLEENAVESNENVAENLEKL
PF3D7_1110200.1-p1:transcript=PF3D7_1110200.1:gene=PF3D7_1110200:organism=Plasmodium_falciparum_3D7:gene_product=pre-mRNA-processing_factor_6__putative:transcript_product=pre-mRNA-processing_factor_6__putative:location=Pf3D7_11_v3:405495-409717(+):protein_length=1329:sequence_SO=chromosome:SO=protein_coding_seq10	PF3D7_1110200.1-p1	(226, 287)	PF3D7_1110200.1-p1pre-mRNA-processing_factor_6__putative	GLRTPYGLQNSLSGLKTPLSGLQNSLSGLKTPLSGLQNSLSGLKTPLSGLQNSLSGLKTPLS
PFIT_1201100.1-p1:transcript=PFIT_1201100.1:gene=PFIT_1201100:organism=Plasmodium_falciparum_IT:gene_product=Plasmodium_exported_protein__unknown_function:transcript_product=Plasmodium_exported_protein__unknown_function:location=PfIT_12_v3:48311-51930(-):protein_length=1149:sequence_SO=chromosome:SO=protein_coding_seq33	PFIT_1201100.1-p1	(801, 862)	PFIT_1201100.1-p1Plasmodium_exported_protein__unknown_function	EINDKRNNEENNDESNEVNNEESNEVNNEENNDVYNEENNEINKEENNEVNNEEMNEVNNEV
PFIT_1201100.1-p1:transcript=PFIT_1201100.1:gene=PFIT_1201100:organism=Plasmodium_falciparum_IT:gene_product=Plasmodium_exported_protein__unknown_function:transcript_product=Plasmodium_exported_protein__unknown_function:location=PfIT_12_v3:48311-51930(-):protein_length=1149:sequence_SO=chromosome:SO=protein_coding_seq35	PFIT_1201100.1-p1	(851, 912)	PFIT_1201100.1-p1Plasmodium_exported_protein__unknown_function	NNEEMNEVNNEVNNEEMNEVNNEENNEENNEENNEENNEEMNEVNNEENNEVNNEENNEVNN
PFIT_1201100.1-p1:transcript=PFIT_1201100.1:gene=PFIT_1201100:organism=Plasmodium_falciparum_IT:gene_product=Plasmodium_exported_protein__unknown_function:transcript_product=Plasmodium_exported_protein__unknown_function:location=PfIT_12_v3:48311-51930(-):protein_length=1149:sequence_SO=chromosome:SO=protein_coding_seq39	PFIT_1201100.1-p1	(951, 1012)	PFIT_1201100.1-p1Plasmodium_exported_protein__unknown_function	NKEENNKGNDEINNEGNNKGNDDMNNDMNKEENNEGNNKGNDDMNNDMNKEENNEGNNEINK
PFCLINvar37_seq76	PFCLINvar37	(1876, 1937)	var	SDITSSSESEYEEMDINDIYVPGSPKYKTLIEVVLEPSGNNTTASGNNTPSDTQNDIQNDGI
IGHvar39_seq78	IGHvar39	(1926, 1987)	var	NADKKNIIKTTYSYDKLKSPNNGSVSLEEFSSRPQFLRWFTEWGDEFCTERQEKEEKVKNYC
IGHvar39_seq79	IGHvar39	(1951, 2012)	var	SLEEFSSRPQFLRWFTEWGDEFCTERQEKEEKVKNYCTENYDGCAKNNKHPNCDKACKAYRK
PFCLINvar60_seq17	PFCLINvar60	(401, 462)	var	HGTINNMYAKDFYEKLGNEHRTVDTFLKLLNKEKECKNHPDVGEGKRTFIDFNDNIETFSHT
PFCLINvar60_seq16	PFCLINvar60	(376, 437)	var	ELEFLKQKKKYKNEIKERGPTKKTSHGTINNMYAKDFYEKLGNEHRTVDTFLKLLNKEKECK
PFCLINvar60_seq19	PFCLINvar60	(451, 512)	var	DFNDNIETFSHTKICEPCPWCGVKPGGPPWKDNDIDSCGKKEIISFGNKDTTDISILSTNDE
AAQ73927_seq16	AAQ73927	(376, 437)	var	EECTSYNEWLKKKEGEFNKQNNKYEKEIENDQSNSHSTYDNELYNNLKGNYPSFKKFVETLK
PF3D7_1338700.1-p1:transcript=PF3D7_1338700.1:gene=PF3D7_1338700:organism=Plasmodium_falciparum_3D7:gene_product=conserved_Plasmodium_protein__unknown_function:transcript_product=conserved_Plasmodium_protein__unknown_function:location=Pf3D7_13_v3:1561255-1563123(-):protein_length=622:sequence_SO=chromosome:SO=protein_coding_seq1	PF3D7_1338700.1-p1	(1, 62)	PF3D7_1338700.1-p1conserved_Plasmodium_protein__unknown_function	MEKLKGAHLVCTSDNKIENTKLNSKKKYSNLVRIFKEEVDYLKKKKQEDIIFEQKKKELLKM
PFIT_0907600.1-p1:transcript=PFIT_0907600.1:gene=PFIT_0907600:organism=Plasmodium_falciparum_IT:gene_product=ATP-dependent_heat_shock_protein__putative:transcript_product=ATP-dependent_heat_shock_protein__putative:location=PfIT_09_v3:334494-337265(-):protein_length=923:sequence_SO=chromosome:SO=protein_coding_seq9	PFIT_0907600.1-p1	(201, 262)	PFIT_0907600.1-p1ATP-dependent_heat_shock_protein__putative	NINGNNINNINNINSMNNINNINSINSINNNNINNSYNSYNNCKYINNNNNNNDYNNFSRHG
PFIT_0731650.1-p1:transcript=PFIT_0731650.1:gene=PFIT_0731650:organism=Plasmodium_falciparum_IT:gene_product=rifin:transcript_product=rifin:location=PfIT_07_v3:1388855-1389931(+):protein_length=358:sequence_SO=chromosome:SO=protein_coding_seq12	PFIT_0731650.1-p1	(276, 337)	rifin	VGEATQGAAEVAKKASESATAEITEKQTALIEAGFNSSITSINASIIAILIIVLIMVIIYLI
PFIT_0731650.1-p1:transcript=PFIT_0731650.1:gene=PFIT_0731650:organism=Plasmodium_falciparum_IT:gene_product=rifin:transcript_product=rifin:location=PfIT_07_v3:1388855-1389931(+):protein_length=358:sequence_SO=chromosome:SO=protein_coding_seq11	PFIT_0731650.1-p1	(251, 312)	rifin	HLRDAGGNKIGPPASHAIPQMINNLVGEATQGAAEVAKKASESATAEITEKQTALIEAGFNS
PF11_0008_D8_seq16	PF11_0008_D8	(376, 437)	var	YNEPFYDIFEDDVYYDVYDENPFVDDIPMDHNKVDVPKKVHIEMKILNNTSNGSLEQQFPIS
PF11_0008_D8_seq10	PF11_0008_D8	(226, 287)	var	VSNNVYSGIDLINDTLSGNQHIDIYDEVLKRKENELFGTNYKKNTSNNNVAKLTNSDPIMNQ
PF3D7_0629700.1-p1:transcript=PF3D7_0629700.1:gene=PF3D7_0629700:organism=Plasmodium_falciparum_3D7:gene_product=SET_domain_protein__putative:transcript_product=SET_domain_protein__putative:location=Pf3D7_06_v3:1221941-1242922(+):protein_length=6753:sequence_SO=chromosome:SO=protein_coding_seq63	PF3D7_0629700.1-p1	(1551, 1612)	PF3D7_0629700.1-p1SET_domain_protein__putative	TSCSALYKKVKKGKNKNGENKNGENKNGDIKNDDIKNDDIKNDDIRNDDDKNDENEENTKEC
PFIT_bin07600.1-p1:transcript=PFIT_bin07600.1:gene=PFIT_bin07600:organism=Plasmodium_falciparum_IT:gene_product=erythrocyte_membrane_protein_1__PfEMP1:transcript_product=erythrocyte_membrane_protein_1__PfEMP1:location=PfIT_bin_v3_archived_contig_18:5940-15665(-):protein_length=2975:sequence_SO=random_sequence:SO=protein_coding_seq118	PFIT_bin07600.1-p1	(2926, 2987)	var	DLEKYNEPYYDVQDDIYYDVHDHDASTVDTNAMDVPSKVQIEMDVNTKLVKEKYPISDVWDI
PFIT_bin07600.1-p1:transcript=PFIT_bin07600.1:gene=PFIT_bin07600:organism=Plasmodium_falciparum_IT:gene_product=erythrocyte_membrane_protein_1__PfEMP1:transcript_product=erythrocyte_membrane_protein_1__PfEMP1:location=PfIT_bin_v3_archived_contig_18:5940-15665(-):protein_length=2975:sequence_SO=random_sequence:SO=protein_coding_seq111	PFIT_bin07600.1-p1	(2751, 2812)	var	SIHDRNLYSGEEYNYNVNMVNNDDIPINRDNNVYSGIDLINDALNGDYDIYDEILKRKENEL
PFIT_0701400.1-p1:transcript=PFIT_0701400.1:gene=PFIT_0701400:organism=Plasmodium_falciparum_IT:gene_product=Plasmodium_exported_protein__unknown_function:transcript_product=Plasmodium_exported_protein__unknown_function:location=PfIT_07_v3:137196-138228(-):protein_length=253:sequence_SO=chromosome:SO=protein_coding_seq3	PFIT_0701400.1-p1	(51, 112)	PFIT_0701400.1-p1Plasmodium_exported_protein__unknown_function	RSYKKRKGMRILKSSSVTKDRLYRGTVFDEDDNVDGHHKKTKAHGLFEEIEKRNGFDLNDDT
PF3D7_1417600.1-p1:transcript=PF3D7_1417600.1:gene=PF3D7_1417600:organism=Plasmodium_falciparum_3D7:gene_product=conserved_Plasmodium_protein__unknown_function:transcript_product=conserved_Plasmodium_protein__unknown_function:location=Pf3D7_14_v3:730694-744682(-):protein_length=4662:sequence_SO=chromosome:SO=protein_coding_seq46	PF3D7_1417600.1-p1	(1126, 1187)	PF3D7_1417600.1-p1conserved_Plasmodium_protein__unknown_function	IEENVNKELLKKHKIYKKDYYTVENVHINHIQYDDNNLYYNDDLYNYYQSKNDDGYLDLSNH
IGHvar13_seq86	IGHvar13	(2126, 2187)	var	LDKYNEPYYDVQDDIYYDVNDDHDTSTVDTNAMDVPSKVQIEMDVNTKLVKEKYPIADVWDI
PFIT_0111600.1-p1:transcript=PFIT_0111600.1:gene=PFIT_0111600:organism=Plasmodium_falciparum_IT:gene_product=Plasmodium_exported_protein__unknown_function:transcript_product=Plasmodium_exported_protein__unknown_function:location=PfIT_01_v3:443241-445151(-):protein_length=593:sequence_SO=chromosome:SO=protein_coding_seq5	PFIT_0111600.1-p1	(101, 162)	PFIT_0111600.1-p1Plasmodium_exported_protein__unknown_function	ISDTSTNKTNTLFEPSNVKKEEQKNKQTKNSGLSHMFSSEINKTQTNESNNKREISLTVKNQ
PFIT_0111600.1-p1:transcript=PFIT_0111600.1:gene=PFIT_0111600:organism=Plasmodium_falciparum_IT:gene_product=Plasmodium_exported_protein__unknown_function:transcript_product=Plasmodium_exported_protein__unknown_function:location=PfIT_01_v3:443241-445151(-):protein_length=593:sequence_SO=chromosome:SO=protein_coding_seq4	PFIT_0111600.1-p1	(76, 137)	PFIT_0111600.1-p1Plasmodium_exported_protein__unknown_function	ECPFNHYCSYQEKKQHYRILADYHNISDTSTNKTNTLFEPSNVKKEEQKNKQTKNSGLSHMF
PFIT_0111600.1-p1:transcript=PFIT_0111600.1:gene=PFIT_0111600:organism=Plasmodium_falciparum_IT:gene_product=Plasmodium_exported_protein__unknown_function:transcript_product=Plasmodium_exported_protein__unknown_function:location=PfIT_01_v3:443241-445151(-):protein_length=593:sequence_SO=chromosome:SO=protein_coding_seq6	PFIT_0111600.1-p1	(126, 187)	PFIT_0111600.1-p1Plasmodium_exported_protein__unknown_function	KQTKNSGLSHMFSSEINKTQTNESNNKREISLTVKNQKNQTNKSKNNKKDKRNISISNKRNQ
PFIT_1235600.1-p1:transcript=PFIT_1235600.1:gene=PFIT_1235600:organism=Plasmodium_falciparum_IT:gene_product=pre-mRNA-splicing_factor_SYF1__putative:transcript_product=pre-mRNA-splicing_factor_SYF1__putative:location=PfIT_12_v3:1448197-1451867(-):protein_length=1012:sequence_SO=chromosome:SO=protein_coding_seq22	PFIT_1235600.1-p1	(526, 587)	PFIT_1235600.1-p1pre-mRNA-splicing_factor_SYF1__putative	VDIDTNLIIDLYMDKINYLLDQRKTYIADIKLKNNKNNVYIWLSKIDSIINEEEKIHLYDES
PFIT_0508500.1-p1:transcript=PFIT_0508500.1:gene=PFIT_0508500:organism=Plasmodium_falciparum_IT:gene_product=guanidine_nucleotide_exchange_factor:transcript_product=guanidine_nucleotide_exchange_factor:location=PfIT_05_v3:355150-362973(-):protein_length=2607:sequence_SO=chromosome:SO=protein_coding_seq85	PFIT_0508500.1-p1	(2101, 2162)	guanidine_nucleotide_exchange_factor	GNNPMGGYNPMGGNNPMGGYNPMGGNNPMGGNNPMGGNNPMGGYNPMGGNNTMGGNNPMGGY
PFIT_0508500.1-p1:transcript=PFIT_0508500.1:gene=PFIT_0508500:organism=Plasmodium_falciparum_IT:gene_product=guanidine_nucleotide_exchange_factor:transcript_product=guanidine_nucleotide_exchange_factor:location=PfIT_05_v3:355150-362973(-):protein_length=2607:sequence_SO=chromosome:SO=protein_coding_seq82	PFIT_0508500.1-p1	(2026, 2087)	guanidine_nucleotide_exchange_factor	LGKDMGNIQRPKGVSTFGTHQDNKKINSNEGNESLLRKAKNDNLNDRFEMKEGKGMINGVMK
PF3D7_1120600.1-p1:transcript=PF3D7_1120600.1:gene=PF3D7_1120600:organism=Plasmodium_falciparum_3D7:gene_product=conserved_Plasmodium_protein__unknown_function:transcript_product=conserved_Plasmodium_protein__unknown_function:location=Pf3D7_11_v3:775233-783639(-):protein_length=2545:sequence_SO=chromosome:SO=protein_coding_seq43	PF3D7_1120600.1-p1	(1051, 1112)	PF3D7_1120600.1-p1conserved_Plasmodium_protein__unknown_function	KESYLENAKDVIKKESPLNNVEDTKKEESYSKNIENANKEEYESNEETYVNKMEEDSNDIED
PF3D7_1120600.1-p1:transcript=PF3D7_1120600.1:gene=PF3D7_1120600:organism=Plasmodium_falciparum_3D7:gene_product=conserved_Plasmodium_protein__unknown_function:transcript_product=conserved_Plasmodium_protein__unknown_function:location=Pf3D7_11_v3:775233-783639(-):protein_length=2545:sequence_SO=chromosome:SO=protein_coding_seq47	PF3D7_1120600.1-p1	(1151, 1212)	PF3D7_1120600.1-p1conserved_Plasmodium_protein__unknown_function	KESIEISNLNKRESCTSNINNFRIRENQSNMVEYENKRKSDNIEINNLNKADIYVNSIKNVS
PF3D7_1120600.1-p1:transcript=PF3D7_1120600.1:gene=PF3D7_1120600:organism=Plasmodium_falciparum_3D7:gene_product=conserved_Plasmodium_protein__unknown_function:transcript_product=conserved_Plasmodium_protein__unknown_function:location=Pf3D7_11_v3:775233-783639(-):protein_length=2545:sequence_SO=chromosome:SO=protein_coding_seq49	PF3D7_1120600.1-p1	(1201, 1262)	PF3D7_1120600.1-p1conserved_Plasmodium_protein__unknown_function	ADIYVNSIKNVSKRNSSYNKKERDSKKDRDSVYDENRRKSSAYQINDIYNIRDKSKEKIDMD
PF3D7_1149000.1-p1:transcript=PF3D7_1149000.1:gene=PF3D7_1149000:organism=Plasmodium_falciparum_3D7:gene_product=antigen_332__DBL-like_protein:transcript_product=antigen_332__DBL-like_protein:location=Pf3D7_11_v3:1950210-1968726(+):protein_length=6093:sequence_SO=chromosome:SO=protein_coding_seq208	PF3D7_1149000.1-p1	(5176, 5237)	antigen_332__DBL-like_protein	STEGLEEVSNTEDVEEVSSTEDVEEGSVAENVKETKSITEEVSVEEDIITDKVSVEQEVMAE
MAL6P1.1_D6_seq5	MAL6P1.1_D6	(101, 162)	var	YVPHAPKYKTLIEVVLEPSGNNTTASGNNTTASGNNTTASGNNTTASGNNTTASDTQNDIQN
PFA0005w_D2_seq14	PFA0005w_D2	(326, 387)	var	WIDNQKLEFEKQKEKYTKEIKKKHPTTIIIKTANRKTTINNLYVKEFYKKLQEKYGDVENFL
PFA0005w_D2_seq11	PFA0005w_D2	(251, 312)	var	VPQYLRWFEEWAEDFCRLRKHKLKDAKNKCRGDSGNDRYCDLNRYDCTQTIRGNEHFVEKDD
PFIT_0207400.1-p1:transcript=PFIT_0207400.1:gene=PFIT_0207400:organism=Plasmodium_falciparum_IT:gene_product=conserved_Plasmodium_protein__unknown_function:transcript_product=conserved_Plasmodium_protein__unknown_function:location=PfIT_02_v3:274085-281321(+):protein_length=1790:sequence_SO=chromosome:SO=protein_coding_seq27	PFIT_0207400.1-p1	(651, 712)	PFIT_0207400.1-p1conserved_Plasmodium_protein__unknown_function	ENEGGKKKVQRQKKYHQENDERDAYKRNNAKYEEDDNREQVEKNDEGEKNDEGGKKGEGEKK
DD2var20_seq40	DD2var20	(976, 1037)	var	TQLQSGTIPNDFLRLMFYTLGDYRDILVRGGGDTNSGSEKEGGGSNSDRNIVLLASGSTEEE
DD2var20_seq46	DD2var20	(1126, 1187)	var	EIKEENSETQPKVGTSQHPETTKLKDFVEIPTYFRWLEEWGEEFCRKRKHKLEEIDKECAQD
PF3D7_0613800.1-p1:transcript=PF3D7_0613800.1:gene=PF3D7_0613800:organism=Plasmodium_falciparum_3D7:gene_product=AP2_domain_transcription_factor__putative:transcript_product=AP2_domain_transcription_factor__putative:location=Pf3D7_06_v3:566139-578993(+):protein_length=4109:sequence_SO=chromosome:SO=protein_coding_seq33	PF3D7_0613800.1-p1	(801, 862)	PF3D7_0613800.1-p1AP2_domain_transcription_factor__putative	NMTHKQIKLDSVSTDMNSKKYYLLKNETSPLERHNKDKDTITSSNISFLKNTPSEYMLHKEH
PF3D7_0613800.1-p1:transcript=PF3D7_0613800.1:gene=PF3D7_0613800:organism=Plasmodium_falciparum_3D7:gene_product=AP2_domain_transcription_factor__putative:transcript_product=AP2_domain_transcription_factor__putative:location=Pf3D7_06_v3:566139-578993(+):protein_length=4109:sequence_SO=chromosome:SO=protein_coding_seq34	PF3D7_0613800.1-p1	(826, 887)	PF3D7_0613800.1-p1AP2_domain_transcription_factor__putative	NETSPLERHNKDKDTITSSNISFLKNTPSEYMLHKEHVINRVTKNDDMQDDKYETSKNSDQH
PF3D7_0936800.1-p1:transcript=PF3D7_0936800.1:gene=PF3D7_0936800:organism=Plasmodium_falciparum_3D7:gene_product=Plasmodium_exported_protein_(PHISTc)__unknown_function:transcript_product=Plasmodium_exported_protein_(PHISTc)__unknown_function:location=Pf3D7_09_v3:1458392-1459862(+):protein_length=383:sequence_SO=chromosome:SO=protein_coding_seq13	PF3D7_0936800.1-p1	(301, 362)	PF3D7_0936800.1-p1Plasmodium_exported_protein_(PHISTc)__unknown_function	HKVQPPKVQQQKVQPPKSQQQKVQPPKSQQQKVQPPKVQQQKVQPPKVQKPKLQNQKGQKQV
PF3D7_1309700.1-p1:transcript=PF3D7_1309700.1:gene=PF3D7_1309700:organism=Plasmodium_falciparum_3D7:gene_product=vacuolar_protein_sorting-associated_protein_18__putative:transcript_product=vacuolar_protein_sorting-associated_protein_18__putative:location=Pf3D7_13_v3:440265-445283(+):protein_length=1672:sequence_SO=chromosome:SO=protein_coding_seq51	PF3D7_1309700.1-p1	(1251, 1312)	PF3D7_1309700.1-p1vacuolar_protein_sorting-associated_protein_18__putative	NTNEQDNINKQDNINKQDNINKQDNTNKQDNTNEQDNTNEQNSVNEKDIINSQDNLTSRENI
PFIT_0703200.1-p1:transcript=PFIT_0703200.1:gene=PFIT_0703200:organism=Plasmodium_falciparum_IT:gene_product=conserved_Plasmodium_membrane_protein__unknown_function:transcript_product=conserved_Plasmodium_membrane_protein__unknown_function:location=PfIT_07_v3:229358-234766(+):protein_length=1802:sequence_SO=chromosome:SO=protein_coding_seq25	PFIT_0703200.1-p1	(601, 662)	PFIT_0703200.1-p1conserved_Plasmodium_membrane_protein__unknown_function	AFLKNKEDQQIMDIKSKNDNMEIKRDNIKSKNDNIEIKKDNIKGKNDNMEIKRDNIKGKNDN
PFIT_0703200.1-p1:transcript=PFIT_0703200.1:gene=PFIT_0703200:organism=Plasmodium_falciparum_IT:gene_product=conserved_Plasmodium_membrane_protein__unknown_function:transcript_product=conserved_Plasmodium_membrane_protein__unknown_function:location=PfIT_07_v3:229358-234766(+):protein_length=1802:sequence_SO=chromosome:SO=protein_coding_seq24	PFIT_0703200.1-p1	(576, 637)	PFIT_0703200.1-p1conserved_Plasmodium_membrane_protein__unknown_function	NFITHTNNNLNIDEDTKKMQKDIFSAFLKNKEDQQIMDIKSKNDNMEIKRDNIKSKNDNIEI
RAJ116var30_seq2	RAJ116var30	(26, 87)	var	GGGGNDYSDAKHLLDSIGEEVYKEKVKSESNGFKDDLKGDLQKATNRSGETVSSNKPCELVK
IT4var61_seq19	IT4var61	(451, 512)	var	KPPEVGNQKADAANFTKDNLEKTFSHTTYCQACPWCGVKRNGGGWKAKSDGECAKEKKTYKK
PFIT_1336700.1-p1:transcript=PFIT_1336700.1:gene=PFIT_1336700:organism=Plasmodium_falciparum_IT:gene_product=conserved_Plasmodium_protein__unknown_function:transcript_product=conserved_Plasmodium_protein__unknown_function:location=PfIT_13_v3:1463389-1472484(-):protein_length=3031:sequence_SO=chromosome:SO=protein_coding_seq21	PFIT_1336700.1-p1	(501, 562)	PFIT_1336700.1-p1conserved_Plasmodium_protein__unknown_function	KTKTDLNHSEYDKGIKDEHTNSNINLSNVKLKYINIITYYMDLLSPFNKCYSEKNGTTNEDQ
PF3D7_0703500.1-p1:transcript=PF3D7_0703500.1:gene=PF3D7_0703500:organism=Plasmodium_falciparum_3D7:gene_product=erythrocyte_membrane-associated_antigen:transcript_product=erythrocyte_membrane-associated_antigen:location=Pf3D7_07_v3:135606-142505(+):protein_length=2299:sequence_SO=chromosome:SO=protein_coding_seq20	PF3D7_0703500.1-p1	(476, 537)	erythrocyte_membrane-associated_antigen	NKTSSSSYAPNFKRETSDDISNNNINYNNTNYNNTNYNNTNYNNNNYNKIKDSNNNSNNNMI
PF3D7_0703500.1-p1:transcript=PF3D7_0703500.1:gene=PF3D7_0703500:organism=Plasmodium_falciparum_3D7:gene_product=erythrocyte_membrane-associated_antigen:transcript_product=erythrocyte_membrane-associated_antigen:location=Pf3D7_07_v3:135606-142505(+):protein_length=2299:sequence_SO=chromosome:SO=protein_coding_seq21	PF3D7_0703500.1-p1	(501, 562)	erythrocyte_membrane-associated_antigen	NYNNTNYNNTNYNNTNYNNNNYNKIKDSNNNSNNNMIIMTNEMNSIDLHKNINILTMESSNC
PF3D7_1134300.1-p1:transcript=PF3D7_1134300.1:gene=PF3D7_1134300:organism=Plasmodium_falciparum_3D7:gene_product=conserved_Plasmodium_protein__unknown_function:transcript_product=conserved_Plasmodium_protein__unknown_function:location=Pf3D7_11_v3:1333536-1340219(+):protein_length=2227:sequence_SO=chromosome:SO=protein_coding_seq81	PF3D7_1134300.1-p1	(2001, 2062)	PF3D7_1134300.1-p1conserved_Plasmodium_protein__unknown_function	ENQDNENNNKEENHDNENNNKEENQDNENNNKEENQDNENNNKEENQDNENNNKEENQKNEN
IT4var32a_seq100	IT4var32a	(2476, 2537)	var	DRISDNHHPYSGIDLINDTLSGNKNIDIYDELLKRKENELFGTEHHPKRTTTNHFATPTRDD
PF3D7_0607700.1-p1:transcript=PF3D7_0607700.1:gene=PF3D7_0607700:organism=Plasmodium_falciparum_3D7:gene_product=conserved_Plasmodium_protein__unknown_function:transcript_product=conserved_Plasmodium_protein__unknown_function:location=Pf3D7_06_v3:320740-328998(+):protein_length=2752:sequence_SO=chromosome:SO=protein_coding_seq44	PF3D7_0607700.1-p1	(1076, 1137)	PF3D7_0607700.1-p1conserved_Plasmodium_protein__unknown_function	NLQRGDNLQRGDNLQRGDNLQNGDNLQNGDNLQRGDNLQNGENLQSGENLQSGENLQSGENL
PFIT_bin09100.1-p1:transcript=PFIT_bin09100.1:gene=PFIT_bin09100:organism=Plasmodium_falciparum_IT:gene_product=BC_ITvar16_-_erythrocyte_membrane_protein_1__putative:transcript_product=BC_ITvar16_-_erythrocyte_membrane_protein_1__putative:location=PfIT_bin_v3_archived_contig_24:254-7927(-):protein_length=2558:sequence_SO=random_sequence:SO=protein_coding_seq51	PFIT_bin09100.1-p1	(1251, 1312)	var	EEQKHFCTSGDKENKDKYAFREKPKDHDDACACENNTKPQPAPKKEEEACNMVNTILSAHAG
PFIT_1025000.1-p1:transcript=PFIT_1025000.1:gene=PFIT_1025000:organism=Plasmodium_falciparum_IT:gene_product=conserved_Plasmodium_protein__unknown_function:transcript_product=conserved_Plasmodium_protein__unknown_function:location=PfIT_10_v3:1003073-1022326(-):protein_length=5728:sequence_SO=chromosome:SO=protein_coding_seq191	PFIT_1025000.1-p1	(4751, 4812)	PFIT_1025000.1-p1conserved_Plasmodium_protein__unknown_function	KLKKNFYDNQNYYKEGENYEHGQENSDLFRTFDTYSEDEEEELEKYNKDDEKRDIDSIEYYM
IGHvar30_seq17	IGHvar30	(401, 462)	var	GSKINEEYYKEFYEKLKNEYKDVHNFLTLLNEGRYCKEELQGEENVDFTNTNEKGASYRSKY
IGHvar30_seq19	IGHvar30	(451, 512)	var	TNEKGASYRSKYCKVCPYCGVDCVGTNCKPKKEIYPNCEIDEIYSPDGAETTEINVINSGDK
PF3D7_1035200.1-p1:transcript=PF3D7_1035200.1:gene=PF3D7_1035200:organism=Plasmodium_falciparum_3D7:gene_product=S-antigen:transcript_product=S-antigen:location=Pf3D7_10_v3:1394839-1396596(+):protein_length=585:sequence_SO=chromosome:SO=protein_coding_seq5	PF3D7_1035200.1-p1	(101, 162)	S-antigen	SEDEVSNGREDKVSNGGEDEVSNGGEDEVSNGREDKVSNGGEDEVSNGREDKVSNGGEDEVS
PFIT_bin10500.1-p1:transcript=PFIT_bin10500.1:gene=PFIT_bin10500:organism=Plasmodium_falciparum_IT:gene_product=erythrocyte_membrane_protein_1__PfEMP1:transcript_product=erythrocyte_membrane_protein_1__PfEMP1:location=PfIT_bin_v3_archived_contig_40:4-8125(-):protein_length=2203:sequence_SO=random_sequence:SO=protein_coding_seq76	PFIT_bin10500.1-p1	(1876, 1937)	var	INDIYVPGSPKYKTLIEVVLEPSGNNTPTSDIPSDNTPTNKFADNEWNQLKDDFISNMLQNQ
PFIT_bin10500.1-p1:transcript=PFIT_bin10500.1:gene=PFIT_bin10500:organism=Plasmodium_falciparum_IT:gene_product=erythrocyte_membrane_protein_1__PfEMP1:transcript_product=erythrocyte_membrane_protein_1__PfEMP1:location=PfIT_bin_v3_archived_contig_40:4-8125(-):protein_length=2203:sequence_SO=random_sequence:SO=protein_coding_seq73	PFIT_bin10500.1-p1	(1801, 1862)	var	TKSSVGNLFQILQIPKSDYDIPTLKSSNRYIPYVSDRYKGKTYIYMEGDSDEDKYAFMSDTT
PF3D7_1362700.1-p1:transcript=PF3D7_1362700.1:gene=PF3D7_1362700:organism=Plasmodium_falciparum_3D7:gene_product=conserved_Plasmodium_protein__unknown_function:transcript_product=conserved_Plasmodium_protein__unknown_function:location=Pf3D7_13_v3:2510355-2516474(+):protein_length=2039:sequence_SO=chromosome:SO=protein_coding_seq73	PF3D7_1362700.1-p1	(1801, 1862)	PF3D7_1362700.1-p1conserved_Plasmodium_protein__unknown_function	TQIKNEFNSKEYDKTSDCDKNNTPLKNGCNQGFQDNNRHKNKQNKQDKQNKQDKQNKQNKQN
PF3D7_1011800.1-p1:transcript=PF3D7_1011800.1:gene=PF3D7_1011800:organism=Plasmodium_falciparum_3D7:gene_product=PRE-binding_protein:transcript_product=PRE-binding_protein:location=Pf3D7_10_v3:455398-458817(+):protein_length=1139:sequence_SO=chromosome:SO=protein_coding_seq45	PF3D7_1011800.1-p1	(1101, 1162)	PRE-binding_protein	DVTKNETQEKEEQQQEKKKDKQEENQELNQTEKEQEKEQEKEQEKEQEKEQEKEQEKQSNEN
PF3D7_0504800.1-p1:transcript=PF3D7_0504800.1:gene=PF3D7_0504800:organism=Plasmodium_falciparum_3D7:gene_product=conserved_Plasmodium_protein__unknown_function:transcript_product=conserved_Plasmodium_protein__unknown_function:location=Pf3D7_05_v3:187813-204732(-):protein_length=5639:sequence_SO=chromosome:SO=protein_coding_seq144	PF3D7_0504800.1-p1	(3576, 3637)	PF3D7_0504800.1-p1conserved_Plasmodium_protein__unknown_function	QDTYNNNMNTLFKLNECDKKKGEIKNMSLNKNDNIKKGCYLKCKSQNDEKDNKLLNNKNITT
DD2var32_seq140	DD2var32	(3476, 3537)	var	IEIDMDDTTGKKELSNMDTILDDMEDDIYYDVNDENPFVDHIPMDHNKVDVPKKVHVEMKIH
PFIT_1241100.1-p1:transcript=PFIT_1241100.1:gene=PFIT_1241100:organism=Plasmodium_falciparum_IT:gene_product=erythrocyte_membrane_protein_1__PfEMP1:transcript_product=erythrocyte_membrane_protein_1__PfEMP1:location=PfIT_12_v3:1689275-1697107(+):protein_length=2231:sequence_SO=chromosome:SO=protein_coding_seq18	PFIT_1241100.1-p1	(426, 487)	var	SGSSRRQKRGVGGTTNYDGYEKKFYNKLKDDGNYSDVDKFLDLLSKEDVCKKVEDDKGGKID
PFIT_1241100.1-p1:transcript=PFIT_1241100.1:gene=PFIT_1241100:organism=Plasmodium_falciparum_IT:gene_product=erythrocyte_membrane_protein_1__PfEMP1:transcript_product=erythrocyte_membrane_protein_1__PfEMP1:location=PfIT_12_v3:1689275-1697107(+):protein_length=2231:sequence_SO=chromosome:SO=protein_coding_seq17	PFIT_1241100.1-p1	(401, 462)	var	EKQKEQFDKQKEKYPIEIRKYESGASGSSRRQKRGVGGTTNYDGYEKKFYNKLKDDGNYSDV
DD2var29_seq17	DD2var29	(401, 462)	var	EISGGDGGGSSRKKRVARSSSSSDDNGYESKFYKKLKEVGYQDVDSFLEKLNNEEICKKITD
DD2var29_seq18	DD2var29	(426, 487)	var	NGYESKFYKKLKEVGYQDVDSFLEKLNNEEICKKITDEKENIDFKTADNSLNKNINKEGTFY
PF3D7_1025500.1-p1:transcript=PF3D7_1025500.1:gene=PF3D7_1025500:organism=Plasmodium_falciparum_3D7:gene_product=conserved_Plasmodium_protein__unknown_function:transcript_product=conserved_Plasmodium_protein__unknown_function:location=Pf3D7_10_v3:1067652-1086992(-):protein_length=5767:sequence_SO=chromosome:SO=protein_coding_seq115	PF3D7_1025500.1-p1	(2851, 2912)	PF3D7_1025500.1-p1conserved_Plasmodium_protein__unknown_function	IKNKNSSGTDNNITHKKKEPKNEKENSFEEEDNEKSYCRQGTKEIFNNNDLNIYKLKDDDIM
PF3D7_0935900.1-p1:transcript=PF3D7_0935900.1:gene=PF3D7_0935900:organism=Plasmodium_falciparum_3D7:gene_product=ring-exported_protein_1:transcript_product=ring-exported_protein_1:location=Pf3D7_09_v3:1420483-1422807(-):protein_length=713:sequence_SO=chromosome:SO=protein_coding_seq17	PF3D7_0935900.1-p1	(401, 462)	ring-exported_protein_1	KLTTTYDQTKEVKPQAEKDASKLTTTYDQTKEVKPQAEKDALAKTENQNGELLPQAEKDASK
PFIT_0718100.1-p1:transcript=PFIT_0718100.1:gene=PFIT_0718100:organism=Plasmodium_falciparum_IT:gene_product=conserved_Plasmodium_membrane_protein__unknown_function:transcript_product=conserved_Plasmodium_membrane_protein__unknown_function:location=PfIT_07_v3:851368-861483(+):protein_length=3371:sequence_SO=chromosome:SO=protein_coding_seq9	PFIT_0718100.1-p1	(201, 262)	PFIT_0718100.1-p1conserved_Plasmodium_membrane_protein__unknown_function	DYDKNYVHRQNQNVNDKNNNCDENNKTEEGESKHKSTTYIPKNSDNNNDKDIFNKMNEKIKN
PFIT_0718100.1-p1:transcript=PFIT_0718100.1:gene=PFIT_0718100:organism=Plasmodium_falciparum_IT:gene_product=conserved_Plasmodium_membrane_protein__unknown_function:transcript_product=conserved_Plasmodium_membrane_protein__unknown_function:location=PfIT_07_v3:851368-861483(+):protein_length=3371:sequence_SO=chromosome:SO=protein_coding_seq6	PFIT_0718100.1-p1	(126, 187)	PFIT_0718100.1-p1conserved_Plasmodium_membrane_protein__unknown_function	SNVFMSIGIHELKEDYQNQDKDKDKDKDKDIDHDKDKDNDQDNDQDNDQDNDQDNDQDNDQD
PFIT_1123800.1-p1:transcript=PFIT_1123800.1:gene=PFIT_1123800:organism=Plasmodium_falciparum_IT:gene_product=dynein_heavy_chain__putative:transcript_product=dynein_heavy_chain__putative:location=PfIT_11_v3:811411-827721(+):protein_length=5253:sequence_SO=chromosome:SO=protein_coding_seq63	PFIT_1123800.1-p1	(1551, 1612)	PFIT_1123800.1-p1dynein_heavy_chain__putative	EEKNKNANENSNEIETNKYNKKEELTNNRDGDGDGDDDDNIKNDKDEKDEKEETIIKLISSY
PF3D7_0628100.1-p1:transcript=PF3D7_0628100.1:gene=PF3D7_0628100:organism=Plasmodium_falciparum_3D7:gene_product=HECT-domain_(ubiquitin-transferase)__putative:transcript_product=HECT-domain_(ubiquitin-transferase)__putative:location=Pf3D7_06_v3:1122801-1153664(-):protein_length=10287:sequence_SO=chromosome:SO=protein_coding_seq261	PF3D7_0628100.1-p1	(6501, 6562)	PF3D7_0628100.1-p1HECT-domain_(ubiquitin-transferase)__putative	ENEKEVEKDENVHDEKDKVEQIEHEKKKEKDDKEAWLLHYDDGKDTNVKVKKFSNCRISKNE
PF3D7_1335000.1-p1:transcript=PF3D7_1335000.1:gene=PF3D7_1335000:organism=Plasmodium_falciparum_3D7:gene_product=MSP7-like_protein:transcript_product=MSP7-like_protein:location=Pf3D7_13_v3:1416316-1417458(-):protein_length=380:sequence_SO=chromosome:SO=protein_coding_seq4	PF3D7_1335000.1-p1	(76, 137)	PF3D7_1335000.1-p1MSP7-like_protein	LVIGQEGQTDNEGPHTETKPERSVESGGTGDSVSNHESELPRDTETREVVTTVQPGTQLGES
PFIT_0201200.1-p1:transcript=PFIT_0201200.1:gene=PFIT_0201200:organism=Plasmodium_falciparum_IT:gene_product=erythrocyte_membrane_protein_3:transcript_product=erythrocyte_membrane_protein_3:location=PfIT_02_v3:41247-45890(-):protein_length=1482:sequence_SO=chromosome:SO=protein_coding_seq57	PFIT_0201200.1-p1	(1401, 1462)	erythrocyte_membrane_protein_3	PNEGQQNTGLKNAANKGQQNNDLENDGLKHKPNQGQKHTELNNKNLKNKPTDGLKNVKDDEL
PFIT_0201200.1-p1:transcript=PFIT_0201200.1:gene=PFIT_0201200:organism=Plasmodium_falciparum_IT:gene_product=erythrocyte_membrane_protein_3:transcript_product=erythrocyte_membrane_protein_3:location=PfIT_02_v3:41247-45890(-):protein_length=1482:sequence_SO=chromosome:SO=protein_coding_seq56	PFIT_0201200.1-p1	(1376, 1437)	erythrocyte_membrane_protein_3	NERQQNTGLKNTPSEGQQNTGLKNTPNEGQQNTGLKNAANKGQQNNDLENDGLKHKPNQGQK
PFIT_0201200.1-p1:transcript=PFIT_0201200.1:gene=PFIT_0201200:organism=Plasmodium_falciparum_IT:gene_product=erythrocyte_membrane_protein_3:transcript_product=erythrocyte_membrane_protein_3:location=PfIT_02_v3:41247-45890(-):protein_length=1482:sequence_SO=chromosome:SO=protein_coding_seq55	PFIT_0201200.1-p1	(1351, 1412)	erythrocyte_membrane_protein_3	ERQQNTGLKNTASKGQQNTGLKNAPNERQQNTGLKNTPSEGQQNTGLKNTPNEGQQNTGLKN
PFIT_0201200.1-p1:transcript=PFIT_0201200.1:gene=PFIT_0201200:organism=Plasmodium_falciparum_IT:gene_product=erythrocyte_membrane_protein_3:transcript_product=erythrocyte_membrane_protein_3:location=PfIT_02_v3:41247-45890(-):protein_length=1482:sequence_SO=chromosome:SO=protein_coding_seq53	PFIT_0201200.1-p1	(1301, 1362)	erythrocyte_membrane_protein_3	QQNTGLKNTPNERQQNTGLKNTPNERQQNTGLKNTPSEGQQNNDLKNTPNERQQNTGLKNTA
PFIT_0201200.1-p1:transcript=PFIT_0201200.1:gene=PFIT_0201200:organism=Plasmodium_falciparum_IT:gene_product=erythrocyte_membrane_protein_3:transcript_product=erythrocyte_membrane_protein_3:location=PfIT_02_v3:41247-45890(-):protein_length=1482:sequence_SO=chromosome:SO=protein_coding_seq52	PFIT_0201200.1-p1	(1276, 1337)	erythrocyte_membrane_protein_3	QNTGLKNAANKGQQNTGLKNTPSKGQQNTGLKNTPNERQQNTGLKNTPNERQQNTGLKNTPS
PFIT_0201200.1-p1:transcript=PFIT_0201200.1:gene=PFIT_0201200:organism=Plasmodium_falciparum_IT:gene_product=erythrocyte_membrane_protein_3:transcript_product=erythrocyte_membrane_protein_3:location=PfIT_02_v3:41247-45890(-):protein_length=1482:sequence_SO=chromosome:SO=protein_coding_seq51	PFIT_0201200.1-p1	(1251, 1312)	erythrocyte_membrane_protein_3	NTGLKNAANKGQQNTGLKNTPSEGQQNTGLKNAANKGQQNTGLKNTPSKGQQNTGLKNTPNE
PFIT_0201200.1-p1:transcript=PFIT_0201200.1:gene=PFIT_0201200:organism=Plasmodium_falciparum_IT:gene_product=erythrocyte_membrane_protein_3:transcript_product=erythrocyte_membrane_protein_3:location=PfIT_02_v3:41247-45890(-):protein_length=1482:sequence_SO=chromosome:SO=protein_coding_seq50	PFIT_0201200.1-p1	(1226, 1287)	erythrocyte_membrane_protein_3	TGLKNTPSEGQQNTGLKNTPSEGQQNTGLKNAANKGQQNTGLKNTPSEGQQNTGLKNAANKG
PF08_0142_D6_seq11	PF08_0142_D6	(251, 312)	var	DSLSGNRDPTSANHDSYSGNHHPYSGIDLINDSISGNQHIDIYDELLKRKENELFGTNNPKR
PF08_0142_D6_seq17	PF08_0142_D6	(401, 462)	var	NMDTILEDLDKPFNEPYYYDMYDDDIYYDVNDHDTSTVDSNAMDVPSKVQIEMDVNTKLVKE
DD2var13_seq94	DD2var13	(2326, 2387)	var	QNDIQNDGIPSSKITDNEWNQLKDEFISQYLQSEPNTEPNMLGYNVDNNTHPTTSHHNVEEK
DD2var13_seq91	DD2var13	(2251, 2312)	var	TDSGYTDHYSDITSSESEYEEMDINDIYVPGSPKYKTLIEVVLEPSGNNTTASGNNTTASGN
DD2var13_seq93	DD2var13	(2301, 2362)	var	TASGNNTTASGNNTTASGKNTPSDTQNDIQNDGIPSSKITDNEWNQLKDEFISQYLQSEPNT
PFIT_0410600.1-p1:transcript=PFIT_0410600.1:gene=PFIT_0410600:organism=Plasmodium_falciparum_IT:gene_product=conserved_Apicomplexan_protein__unknown_function:transcript_product=conserved_Apicomplexan_protein__unknown_function:location=PfIT_04_v3:564603-566831(+):protein_length=742:sequence_SO=chromosome:SO=protein_coding_seq26	PFIT_0410600.1-p1	(626, 687)	PFIT_0410600.1-p1conserved_Apicomplexan_protein__unknown_function	HDNIKDNEHAYNQDNIKDNEHENNQDNIKDNKHDHIQDNIKDNKHDHIQDNIKDNKHDHNQA
PFIT_0733300.1-p1:transcript=PFIT_0733300.1:gene=PFIT_0733300:organism=Plasmodium_falciparum_IT:gene_product=rifin:transcript_product=rifin:location=PfIT_07_v3:1468938-1470352(+):protein_length=379:sequence_SO=chromosome:SO=protein_coding_seq3	PFIT_0733300.1-p1	(51, 112)	rifin	PANYDNDPQIKELMDNFNKQTQQRLREYDDRMVEKRKLCKEQCDKEIQKIILKDKIEKELTE
PF3D7_0220000.1-p1:transcript=PF3D7_0220000.1:gene=PF3D7_0220000:organism=Plasmodium_falciparum_3D7:gene_product=liver_stage_antigen_3:transcript_product=liver_stage_antigen_3:location=Pf3D7_02_v3:796752-801586(+):protein_length=1558:sequence_SO=chromosome:SO=protein_coding_seq49	PF3D7_0220000.1-p1	(1201, 1262)	liver_stage_antigen_3	LKGSILDMLKGDMELGDMDKESLEDVTAKLGERVESLKDVLSSALGMDEEQMKTRKKAQRPK
PF3D7_0220000.1-p1:transcript=PF3D7_0220000.1:gene=PF3D7_0220000:organism=Plasmodium_falciparum_3D7:gene_product=liver_stage_antigen_3:transcript_product=liver_stage_antigen_3:location=Pf3D7_02_v3:796752-801586(+):protein_length=1558:sequence_SO=chromosome:SO=protein_coding_seq41	PF3D7_0220000.1-p1	(1001, 1062)	liver_stage_antigen_3	AVEINDITSKLIEETQELNEVEADLIKDMEKLKELEKALSEDSKEIIDAKDDTLEKVIEEEH
PF3D7_0220000.1-p1:transcript=PF3D7_0220000.1:gene=PF3D7_0220000:organism=Plasmodium_falciparum_3D7:gene_product=liver_stage_antigen_3:transcript_product=liver_stage_antigen_3:location=Pf3D7_02_v3:796752-801586(+):protein_length=1558:sequence_SO=chromosome:SO=protein_coding_seq40	PF3D7_0220000.1-p1	(976, 1037)	liver_stage_antigen_3	QDNDMDESVEKVLELKNMEEELMKDAVEINDITSKLIEETQELNEVEADLIKDMEKLKELEK
PF3D7_0220000.1-p1:transcript=PF3D7_0220000.1:gene=PF3D7_0220000:organism=Plasmodium_falciparum_3D7:gene_product=liver_stage_antigen_3:transcript_product=liver_stage_antigen_3:location=Pf3D7_02_v3:796752-801586(+):protein_length=1558:sequence_SO=chromosome:SO=protein_coding_seq45	PF3D7_0220000.1-p1	(1101, 1162)	liver_stage_antigen_3	EIKELESEILEDYKELKTIETDILEEKKEIEKDHFEKFEEEAEEIKDLEADILKEVSSLEVE
PF3D7_0220000.1-p1:transcript=PF3D7_0220000.1:gene=PF3D7_0220000:organism=Plasmodium_falciparum_3D7:gene_product=liver_stage_antigen_3:transcript_product=liver_stage_antigen_3:location=Pf3D7_02_v3:796752-801586(+):protein_length=1558:sequence_SO=chromosome:SO=protein_coding_seq44	PF3D7_0220000.1-p1	(1076, 1137)	liver_stage_antigen_3	DVEEDKIEKVSDLKDLEEDILKEVKEIKELESEILEDYKELKTIETDILEEKKEIEKDHFEK
PF3D7_0220000.1-p1:transcript=PF3D7_0220000.1:gene=PF3D7_0220000:organism=Plasmodium_falciparum_3D7:gene_product=liver_stage_antigen_3:transcript_product=liver_stage_antigen_3:location=Pf3D7_02_v3:796752-801586(+):protein_length=1558:sequence_SO=chromosome:SO=protein_coding_seq46	PF3D7_0220000.1-p1	(1126, 1187)	liver_stage_antigen_3	EKKEIEKDHFEKFEEEAEEIKDLEADILKEVSSLEVEEEKKLEEVHELKEEVEHIISGDAHI
PF3D7_0410300.1-p1:transcript=PF3D7_0410300.1:gene=PF3D7_0410300:organism=Plasmodium_falciparum_3D7:gene_product=protein_phosphatase_PPM1__putative:transcript_product=protein_phosphatase_PPM1__putative:location=Pf3D7_04_v3:470528-473596(-):protein_length=906:sequence_SO=chromosome:SO=protein_coding_seq20	PF3D7_0410300.1-p1	(476, 537)	PF3D7_0410300.1-p1protein_phosphatase_PPM1__putative	YEHVDGNKYEHVDGNKNKNVDGNKNKNVDGNKYEHVYDNQKNNVTNSVNTFCSYKYSARCAK
PFIT_1475500.1-p1:transcript=PFIT_1475500.1:gene=PFIT_1475500:organism=Plasmodium_falciparum_IT:gene_product=conserved_Plasmodium_protein__unknown_function:transcript_product=conserved_Plasmodium_protein__unknown_function:location=PfIT_14_v3:3066331-3077356(+):protein_length=2983:sequence_SO=chromosome:SO=protein_coding_seq4	PFIT_1475500.1-p1	(76, 137)	PFIT_1475500.1-p1conserved_Plasmodium_protein__unknown_function	TSDVINVLYDYKNSNLKSSQNKDKDIISSNHEDIINNTLSISNKLKNDDIFEKSMLLVNNKL
PF3D7_1405100.1-p1:transcript=PF3D7_1405100.1:gene=PF3D7_1405100:organism=Plasmodium_falciparum_3D7:gene_product=GTPase-activating_protein__putative:transcript_product=GTPase-activating_protein__putative:location=Pf3D7_14_v3:175503-179705(-):protein_length=1157:sequence_SO=chromosome:SO=protein_coding_seq3	PF3D7_1405100.1-p1	(51, 112)	PF3D7_1405100.1-p1GTPase-activating_protein__putative	ERIMSGGEEKIYMSNIEGKEKNNLNDSNILDKGRSRSSSNNVFKNIDKENDRKKNDDIKDKE
PFIT_1304500.1-p1:transcript=PFIT_1304500.1:gene=PFIT_1304500:organism=Plasmodium_falciparum_IT:gene_product=conserved_Plasmodium_protein__unknown_function:transcript_product=conserved_Plasmodium_protein__unknown_function:location=PfIT_13_v3:225653-236408(-):protein_length=3526:sequence_SO=chromosome:SO=protein_coding_seq68	PFIT_1304500.1-p1	(1676, 1737)	PFIT_1304500.1-p1conserved_Plasmodium_protein__unknown_function	NTSQIMIKQLNKLKGNKNNIEKTNGNINMMSLTNSNKKMNEKGTSKGGLTNRNNNKNKQNID
PFIT_1018600.1-p1:transcript=PFIT_1018600.1:gene=PFIT_1018600:organism=Plasmodium_falciparum_IT:gene_product=conserved_Plasmodium_protein__unknown_function:transcript_product=conserved_Plasmodium_protein__unknown_function:location=PfIT_10_v3:701544-707240(-):protein_length=1898:sequence_SO=chromosome:SO=protein_coding_seq71	PFIT_1018600.1-p1	(1751, 1812)	PFIT_1018600.1-p1conserved_Plasmodium_protein__unknown_function	KKTNQKINIKHLHVVNDNENIIVNNFNKSETQIINDTRKEVYSIVQNQKKSTFLRDKNGTKN
PFIT_0317700.1-p1:transcript=PFIT_0317700.1:gene=PFIT_0317700:organism=Plasmodium_falciparum_IT:gene_product=CPSF_(cleavage_and_polyadenylation_specific_factor)__subunit_A__putative:transcript_product=CPSF_(cleavage_and_polyadenylation_specific_factor)__subunit_A__putative:location=PfIT_03_v3:671324-680874(+):protein_length=2803:sequence_SO=chromosome:SO=protein_coding_seq61	PFIT_0317700.1-p1	(1501, 1562)	PFIT_0317700.1-p1CPSF_(cleavage_and_polyadenylation_specific_factor)__subunit_A__putative	KKKNMGAECMCRNDDNKNGDKKEKKMKKKEHKKKSSTFSNNSDYSDNSNNSNNSDYSDYSDY
PF3D7_0421100.1-p1:transcript=PF3D7_0421100.1:gene=PF3D7_0421100:organism=Plasmodium_falciparum_3D7:gene_product=erythrocyte_membrane_protein_1__PfEMP1:transcript_product=erythrocyte_membrane_protein_1__PfEMP1:location=Pf3D7_04_v3:958067-965611(-):protein_length=2181:sequence_SO=chromosome:SO=protein_coding_seq40	PF3D7_0421100.1-p1	(976, 1037)	var	VDTSNVGEELQNDLEGNGTIPEEFKRQMFYTLGDYKDIFEGKSIEVGDEKDKQKMKEIEKKI
PFIT_0416600.1-p1:transcript=PFIT_0416600.1:gene=PFIT_0416600:organism=Plasmodium_falciparum_IT:gene_product=conserved_Plasmodium_protein__unknown_function:transcript_product=conserved_Plasmodium_protein__unknown_function:location=PfIT_04_v3:819777-835917(+):protein_length=4875:sequence_SO=chromosome:SO=protein_coding_seq130	PFIT_0416600.1-p1	(3226, 3287)	PFIT_0416600.1-p1conserved_Plasmodium_protein__unknown_function	LLSTCKINCVFYINYIKPEEVIKINYKSYNFTYDLILRPLNKQFLKSIYYILCKLNNSSNNV
PF3D7_1329000.1-p1:transcript=PF3D7_1329000.1:gene=PF3D7_1329000:organism=Plasmodium_falciparum_3D7:gene_product=DNA-directed_RNA_polymerase_III_subunit_RPC1__putative:transcript_product=DNA-directed_RNA_polymerase_III_subunit_RPC1__putative:location=Pf3D7_13_v3:1217917-1225535(-):protein_length=2356:sequence_SO=chromosome:SO=protein_coding_seq16	PF3D7_1329000.1-p1	(376, 437)	PF3D7_1329000.1-p1DNA-directed_RNA_polymerase_III_subunit_RPC1__putative	DEVVIPKIIAMRLTYPETVNKYNIDKLKMLIKNGCNKWPGANYIIKKSKKGIDPYSDISTSY
PF3D7_1012700.1-p1:transcript=PF3D7_1012700.1:gene=PF3D7_1012700:organism=Plasmodium_falciparum_3D7:gene_product=NLI_interacting_factor-like_phosphatase__putative:transcript_product=NLI_interacting_factor-like_phosphatase__putative:location=Pf3D7_10_v3:487252-491828(+):protein_length=1438:sequence_SO=chromosome:SO=protein_coding_seq45	PF3D7_1012700.1-p1	(1101, 1162)	PF3D7_1012700.1-p1NLI_interacting_factor-like_phosphatase__putative	YEDDFEGEFVNLKDQEDEIHMFLDDDFEGEFVYLKDDKNDEDYTYMDDYMDGKYSNVKHQKD
PF3D7_0410900.1-p1:transcript=PF3D7_0410900.1:gene=PF3D7_0410900:organism=Plasmodium_falciparum_3D7:gene_product=conserved_Plasmodium_protein__unknown_function:transcript_product=conserved_Plasmodium_protein__unknown_function:location=Pf3D7_04_v3:490442-493375(-):protein_length=977:sequence_SO=chromosome:SO=protein_coding_seq24	PF3D7_0410900.1-p1	(576, 637)	PF3D7_0410900.1-p1conserved_Plasmodium_protein__unknown_function	KELKEVIKKIQFDAKINMNNNKSDVINNMNNNKSDVINNMNNNKSDVINNMSSDHIKNDHIK
PF3D7_0724000.1-p1:transcript=PF3D7_0724000.1:gene=PF3D7_0724000:organism=Plasmodium_falciparum_3D7:gene_product=Rab_GTPase_activator_and_protein_kinase__putative:transcript_product=Rab_GTPase_activator_and_protein_kinase__putative:location=Pf3D7_07_v3:1006335-1012145(+):protein_length=1936:sequence_SO=chromosome:SO=protein_coding_seq70	PF3D7_0724000.1-p1	(1726, 1787)	PF3D7_0724000.1-p1Rab_GTPase_activator_and_protein_kinase__putative	IYYKKGNFKNCEQRKTKINKQKNNNNNNSNNTYNNELAKNVNNHNNMNNTYHELAKNIKNIY
IGHvar35_seq88	IGHvar35	(2176, 2237)	var	VLVPPRRRQLCVKNMTTKLSAIEKKNDFKNELMTSAYNEGKLLGEKYNNDKEKALQAMKYSF
RAJ116var13_seq17	RAJ116var13	(401, 462)	var	VHWIDKKKEEFDKQKNKYDKEIKKYENGASSSSGSGSRRQTRSARGSNSDNNGYEKIFYEKL
PF3D7_1224400.1-p1:transcript=PF3D7_1224400.1:gene=PF3D7_1224400:organism=Plasmodium_falciparum_3D7:gene_product=conserved_Plasmodium_protein__unknown_function:transcript_product=conserved_Plasmodium_protein__unknown_function:location=Pf3D7_12_v3:994255-996438(+):protein_length=595:sequence_SO=chromosome:SO=protein_coding_seq5	PF3D7_1224400.1-p1	(101, 162)	PF3D7_1224400.1-p1conserved_Plasmodium_protein__unknown_function	FNKHNYSNTRYDNNVTGNYFDFDNYYVSNMDNTNNPEKEIYKYDENIEIDGKNKKNNKRLKR
PF3D7_1224400.1-p1:transcript=PF3D7_1224400.1:gene=PF3D7_1224400:organism=Plasmodium_falciparum_3D7:gene_product=conserved_Plasmodium_protein__unknown_function:transcript_product=conserved_Plasmodium_protein__unknown_function:location=Pf3D7_12_v3:994255-996438(+):protein_length=595:sequence_SO=chromosome:SO=protein_coding_seq1	PF3D7_1224400.1-p1	(1, 62)	PF3D7_1224400.1-p1conserved_Plasmodium_protein__unknown_function	MHNNHIFEDDDIILTDRFLSDESSENDKREKKKYIKENKKNIENVSNVLLNNNFNKNVGMKR
PF3D7_1224400.1-p1:transcript=PF3D7_1224400.1:gene=PF3D7_1224400:organism=Plasmodium_falciparum_3D7:gene_product=conserved_Plasmodium_protein__unknown_function:transcript_product=conserved_Plasmodium_protein__unknown_function:location=Pf3D7_12_v3:994255-996438(+):protein_length=595:sequence_SO=chromosome:SO=protein_coding_seq2	PF3D7_1224400.1-p1	(26, 87)	PF3D7_1224400.1-p1conserved_Plasmodium_protein__unknown_function	NDKREKKKYIKENKKNIENVSNVLLNNNFNKNVGMKRNNSIFNNEENKDKNYFTNNDLIEHK
PF3D7_0631400.1-p1:transcript=PF3D7_0631400.1:gene=PF3D7_0631400:organism=Plasmodium_falciparum_3D7:gene_product=Pfmc-2TM_Maurer's_cleft_two_transmembrane_protein:transcript_product=Pfmc-2TM_Maurer's_cleft_two_transmembrane_protein:location=Pf3D7_06_v3:1318327-1319116(-):protein_length=231:sequence_SO=chromosome:SO=protein_coding_seq4	PF3D7_0631400.1-p1	(76, 137)	Pfmc-2TM	ISSLVSLVDNMDITQEKKDKIKNLSLKYINSRDVKEKNESINELQKYSNNEECKEQMDSYLM
PF3D7_0223400.1-p1:transcript=PF3D7_0223400.1:gene=PF3D7_0223400:organism=Plasmodium_falciparum_3D7:gene_product=rifin:transcript_product=rifin:location=Pf3D7_02_v3:913244-914457(+):protein_length=327:sequence_SO=chromosome:SO=protein_coding_seq3	PF3D7_0223400.1-p1	(51, 112)	rifin	NYDSDPEMKRVMQQFVDRTTQRFHEYDNRMKDKRQKCKDKCDKEIQKIILKDKLEKELMDKF
PF3D7_0410300.1-p1:transcript=PF3D7_0410300.1:gene=PF3D7_0410300:organism=Plasmodium_falciparum_3D7:gene_product=protein_phosphatase_PPM1__putative:transcript_product=protein_phosphatase_PPM1__putative:location=Pf3D7_04_v3:470528-473596(-):protein_length=906:sequence_SO=chromosome:SO=protein_coding_seq19	PF3D7_0410300.1-p1	(451, 512)	PF3D7_0410300.1-p1protein_phosphatase_PPM1__putative	KNKNVNGNKYEHVDGNKYEHVDGNKYEHVDGNKYEHVDGNKNKNVDGNKNKNVDGNKYEHVY
PF3D7_0410300.1-p1:transcript=PF3D7_0410300.1:gene=PF3D7_0410300:organism=Plasmodium_falciparum_3D7:gene_product=protein_phosphatase_PPM1__putative:transcript_product=protein_phosphatase_PPM1__putative:location=Pf3D7_04_v3:470528-473596(-):protein_length=906:sequence_SO=chromosome:SO=protein_coding_seq18	PF3D7_0410300.1-p1	(426, 487)	PF3D7_0410300.1-p1protein_phosphatase_PPM1__putative	MGRLEEKKMGDILEGVNSSINVDGNKNKNVNGNKYEHVDGNKYEHVDGNKYEHVDGNKYEHV
PF3D7_1254200.1-p1:transcript=PF3D7_1254200.1:gene=PF3D7_1254200:organism=Plasmodium_falciparum_3D7:gene_product=rifin:transcript_product=rifin:location=Pf3D7_12_v3:2207830-2209115(+):protein_length=351:sequence_SO=chromosome:SO=protein_coding_seq3	PF3D7_1254200.1-p1	(51, 112)	rifin	NYDNDPQMKEVMDNFNRQTQQRFHEYDERMVEKRMQCKDKCDKEIQKIILKDKLEKQMEQQL
PF3D7_1254200.1-p1:transcript=PF3D7_1254200.1:gene=PF3D7_1254200:organism=Plasmodium_falciparum_3D7:gene_product=rifin:transcript_product=rifin:location=Pf3D7_12_v3:2207830-2209115(+):protein_length=351:sequence_SO=chromosome:SO=protein_coding_seq4	PF3D7_1254200.1-p1	(76, 137)	rifin	YDERMVEKRMQCKDKCDKEIQKIILKDKLEKQMEQQLTTLETKIDTNDIPTCVCEKSMTDKV
IGHvar33_seq19	IGHvar33	(451, 512)	var	KKLSNEKICQKKIQVRDETADNVDFTKGKAKETFDHTEYCQACPWCGVKEQKAKGGKWEPKT
PF11_0008_D8_seq9	PF11_0008_D8	(201, 262)	var	RDLYTGEEIKYNINMGTNSMDDPTYVSNNVYSGIDLINDTLSGNQHIDIYDEVLKRKENELF
PF3D7_1452000.1-p1:transcript=PF3D7_1452000.1:gene=PF3D7_1452000:organism=Plasmodium_falciparum_3D7:gene_product=rhoptry_neck_protein_2:transcript_product=rhoptry_neck_protein_2:location=Pf3D7_14_v3:2134298-2140867(+):protein_length=2189:sequence_SO=chromosome:SO=protein_coding_seq29	PF3D7_1452000.1-p1	(701, 762)	rhoptry_neck_protein_2	NAYPHNGMLNNGTEYNVHYGNSDSNNTNDSMLNENYYSDSDYDDHTPGNKKKVYKSVAERNK
PF3D7_1452000.1-p1:transcript=PF3D7_1452000.1:gene=PF3D7_1452000:organism=Plasmodium_falciparum_3D7:gene_product=rhoptry_neck_protein_2:transcript_product=rhoptry_neck_protein_2:location=Pf3D7_14_v3:2134298-2140867(+):protein_length=2189:sequence_SO=chromosome:SO=protein_coding_seq20	PF3D7_1452000.1-p1	(476, 537)	rhoptry_neck_protein_2	YGPNGAYGPNGTYGHNGKYGSKGTYGNNETPYYVEHPEYDNGKSMSDFHVKDSKDNIGPGGD
PF3D7_1452000.1-p1:transcript=PF3D7_1452000.1:gene=PF3D7_1452000:organism=Plasmodium_falciparum_3D7:gene_product=rhoptry_neck_protein_2:transcript_product=rhoptry_neck_protein_2:location=Pf3D7_14_v3:2134298-2140867(+):protein_length=2189:sequence_SO=chromosome:SO=protein_coding_seq21	PF3D7_1452000.1-p1	(501, 562)	rhoptry_neck_protein_2	GNNETPYYVEHPEYDNGKSMSDFHVKDSKDNIGPGGDYPNLYQNIYGNEKNPNIFPGSPRNI
PF3D7_1452000.1-p1:transcript=PF3D7_1452000.1:gene=PF3D7_1452000:organism=Plasmodium_falciparum_3D7:gene_product=rhoptry_neck_protein_2:transcript_product=rhoptry_neck_protein_2:location=Pf3D7_14_v3:2134298-2140867(+):protein_length=2189:sequence_SO=chromosome:SO=protein_coding_seq23	PF3D7_1452000.1-p1	(551, 612)	rhoptry_neck_protein_2	NPNIFPGSPRNINVYSVHHIPNNGANGGLNSGANGGLNNGANDGLNNGANGGLNNGANGGLN
PF3D7_1452000.1-p1:transcript=PF3D7_1452000.1:gene=PF3D7_1452000:organism=Plasmodium_falciparum_3D7:gene_product=rhoptry_neck_protein_2:transcript_product=rhoptry_neck_protein_2:location=Pf3D7_14_v3:2134298-2140867(+):protein_length=2189:sequence_SO=chromosome:SO=protein_coding_seq24	PF3D7_1452000.1-p1	(576, 637)	rhoptry_neck_protein_2	NGGLNSGANGGLNNGANDGLNNGANGGLNNGANGGLNNGANGGLNNGMNNGMNNGMNNGMNN
PF3D7_1452000.1-p1:transcript=PF3D7_1452000.1:gene=PF3D7_1452000:organism=Plasmodium_falciparum_3D7:gene_product=rhoptry_neck_protein_2:transcript_product=rhoptry_neck_protein_2:location=Pf3D7_14_v3:2134298-2140867(+):protein_length=2189:sequence_SO=chromosome:SO=protein_coding_seq25	PF3D7_1452000.1-p1	(601, 662)	rhoptry_neck_protein_2	GGLNNGANGGLNNGANGGLNNGMNNGMNNGMNNGMNNGMNNGMNNGMNNGTNGGLNNGMNNG
PF3D7_1452000.1-p1:transcript=PF3D7_1452000.1:gene=PF3D7_1452000:organism=Plasmodium_falciparum_3D7:gene_product=rhoptry_neck_protein_2:transcript_product=rhoptry_neck_protein_2:location=Pf3D7_14_v3:2134298-2140867(+):protein_length=2189:sequence_SO=chromosome:SO=protein_coding_seq26	PF3D7_1452000.1-p1	(626, 687)	rhoptry_neck_protein_2	GMNNGMNNGMNNGMNNGMNNGMNNGTNGGLNNGMNNGMNNGMNNGMNNGIHDDLYNSENSTF
PF3D7_1452000.1-p1:transcript=PF3D7_1452000.1:gene=PF3D7_1452000:organism=Plasmodium_falciparum_3D7:gene_product=rhoptry_neck_protein_2:transcript_product=rhoptry_neck_protein_2:location=Pf3D7_14_v3:2134298-2140867(+):protein_length=2189:sequence_SO=chromosome:SO=protein_coding_seq27	PF3D7_1452000.1-p1	(651, 712)	rhoptry_neck_protein_2	TNGGLNNGMNNGMNNGMNNGMNNGIHDDLYNSENSTFNNGLNNSGRTGLNNAYPHNGMLNNG
PF3D7_0916000.1-p1:transcript=PF3D7_0916000.1:gene=PF3D7_0916000:organism=Plasmodium_falciparum_3D7:gene_product=major_facilitator_superfamily_domain-containing_protein__putative:transcript_product=major_facilitator_superfamily_domain-containing_protein__putative:location=Pf3D7_09_v3:667255-671725(-):protein_length=1379:sequence_SO=chromosome:SO=protein_coding_seq1	PF3D7_0916000.1-p1	(1, 62)	PF3D7_0916000.1-p1major_facilitator_superfamily_domain-containing_protein__putative	MAEIKNLIKKKENIYNKSDKINNNKESNNIYINKNINIYNNKNIHIYNNEHNNYKEPKEIFQ
RAJ116var24_seq41	RAJ116var24	(1001, 1062)	var	KPEELDKKLKEGKIDDEFMRQMFYTLGDYRDILYSGSNDTTSVSKDTSSSSNDNLKNIVLEA
RAJ116var24_seq40	RAJ116var24	(976, 1037)	var	LWHKYKMDKKKEEEERKEQVEYTSPKPEELDKKLKEGKIDDEFMRQMFYTLGDYRDILYSGS
PF3D7_1338600.1-p1:transcript=PF3D7_1338600.1:gene=PF3D7_1338600:organism=Plasmodium_falciparum_3D7:gene_product=conserved_Plasmodium_protein__unknown_function:transcript_product=conserved_Plasmodium_protein__unknown_function:location=Pf3D7_13_v3:1556659-1559734(-):protein_length=947:sequence_SO=chromosome:SO=protein_coding_seq9	PF3D7_1338600.1-p1	(201, 262)	PF3D7_1338600.1-p1conserved_Plasmodium_protein__unknown_function	FLKDKIKNDTDQCATLNCFDKNDLEDDLTEYDAAFNGIGPWPSTEELIKHQNNIEYDKTDME
HB3var06_seq129	HB3var06	(3201, 3262)	var	IHDRDLYTGEEISYNINMSTNSMDDPKYVSNNVYSGIDLINDTLSGDRIDIYDELLKRKENE
HB3var06_seq124	HB3var06	(3076, 3137)	var	EGDSSGDEKYAFMSDTTDVTSSESEYEELDINDIYVPGSPKYKTLIEVVLEPSKSNGNTLGD
HB3var06_seq122	HB3var06	(3026, 3087)	var	FMKKKPKSPVDLLRVLNIPKRDYEMPTLKSKNRYIPYASDRYKGKTYIYMEGDSSGDEKYAF
PF3D7_1325900.1-p1:transcript=PF3D7_1325900.1:gene=PF3D7_1325900:organism=Plasmodium_falciparum_3D7:gene_product=conserved_Plasmodium_protein__unknown_function:transcript_product=conserved_Plasmodium_protein__unknown_function:location=Pf3D7_13_v3:1076161-1084587(-):protein_length=2756:sequence_SO=chromosome:SO=protein_coding_seq101	PF3D7_1325900.1-p1	(2501, 2562)	PF3D7_1325900.1-p1conserved_Plasmodium_protein__unknown_function	SSVCSHMSSPSPSRISSNSIFHFKQTDNQNVENADPNIIIDNNNSNTKEKKKNSLTNLILKD
PF3D7_1325900.1-p1:transcript=PF3D7_1325900.1:gene=PF3D7_1325900:organism=Plasmodium_falciparum_3D7:gene_product=conserved_Plasmodium_protein__unknown_function:transcript_product=conserved_Plasmodium_protein__unknown_function:location=Pf3D7_13_v3:1076161-1084587(-):protein_length=2756:sequence_SO=chromosome:SO=protein_coding_seq100	PF3D7_1325900.1-p1	(2476, 2537)	PF3D7_1325900.1-p1conserved_Plasmodium_protein__unknown_function	NDEIILLKNKNKTLLHKRDTNKNTSSSVCSHMSSPSPSRISSNSIFHFKQTDNQNVENADPN
RAJ116var37_seq11	RAJ116var37	(251, 312)	var	QQVWNAITCSAEENDRYSKTVDDGKTTLWNEKCGRELSSVPTNLDYVPQYLRWFEEWAEEFC
RAJ116var37_seq12	RAJ116var37	(276, 337)	var	TTLWNEKCGRELSSVPTNLDYVPQYLRWFEEWAEEFCRKRKKKLENAIKKCRQGDDDKERYC
PF3D7_1026600.1-p1:transcript=PF3D7_1026600.1:gene=PF3D7_1026600:organism=Plasmodium_falciparum_3D7:gene_product=conserved_Plasmodium_protein__unknown_function:transcript_product=conserved_Plasmodium_protein__unknown_function:location=Pf3D7_10_v3:1113495-1118573(-):protein_length=1692:sequence_SO=chromosome:SO=protein_coding_seq51	PF3D7_1026600.1-p1	(1251, 1312)	PF3D7_1026600.1-p1conserved_Plasmodium_protein__unknown_function	IIEKEGPIKMFSSSTSIISDGKIDSIHKSDEEEKINDLKEDSNVNIYVKEKGKGKVFMKKGI
PF3D7_1026600.1-p1:transcript=PF3D7_1026600.1:gene=PF3D7_1026600:organism=Plasmodium_falciparum_3D7:gene_product=conserved_Plasmodium_protein__unknown_function:transcript_product=conserved_Plasmodium_protein__unknown_function:location=Pf3D7_10_v3:1113495-1118573(-):protein_length=1692:sequence_SO=chromosome:SO=protein_coding_seq50	PF3D7_1026600.1-p1	(1226, 1287)	PF3D7_1026600.1-p1conserved_Plasmodium_protein__unknown_function	GRHSFFNANKLLNSIEIKIGEHNSKIIEKEGPIKMFSSSTSIISDGKIDSIHKSDEEEKIND
PFIT_1475300.1-p1:transcript=PFIT_1475300.1:gene=PFIT_1475300:organism=Plasmodium_falciparum_IT:gene_product=conserved_Plasmodium_membrane_protein__unknown_function:transcript_product=conserved_Plasmodium_membrane_protein__unknown_function:location=PfIT_14_v3:3045996-3061013(-):protein_length=4777:sequence_SO=chromosome:SO=protein_coding_seq186	PFIT_1475300.1-p1	(4626, 4687)	PFIT_1475300.1-p1conserved_Plasmodium_membrane_protein__unknown_function	DDKKKNEDNTKILGNQNEYIYNNKLITNKNVSNANIHFPIKSDIYGEEQNCYNKNINNSNTT
IGHvar32_seq131	IGHvar32	(3251, 3312)	var	DDIEDDIYYDVNDDENPSVDDIPMDHNKVDVPKKVHVEMKILNNTSNGTLEPEFPISDVWNI
MAL8P1.220_D6_seq6	MAL8P1.220_D6	(126, 187)	var	SGNNTPTSGKNTTASDTQNDIQSDDTPSSKITDNEWNTLKDEFISQYIQSEQPNDYKSGNSS
HB3var06_seq134	HB3var06	(3326, 3387)	var	DGGDIPNDNKKLNTDVSFEIDMDETKGKKEFSNMDTILDDMEDDIYYDVNDENPSVDNIPMD
PF3D7_0506900.1-p1:transcript=PF3D7_0506900.1:gene=PF3D7_0506900:organism=Plasmodium_falciparum_3D7:gene_product=rhomboid_protease_ROM4:transcript_product=rhomboid_protease_ROM4:location=Pf3D7_05_v3:288776-291055(-):protein_length=759:sequence_SO=chromosome:SO=protein_coding_seq12	PF3D7_0506900.1-p1	(276, 337)	rhomboid_protease_ROM4	IKIIVTSDENLHTLPSGAVGRRAPLNPFSSPILGKYRRKNKNAKAKVKDPRLNNNPLIGRLT
PFIT_0522600.1-p1:transcript=PFIT_0522600.1:gene=PFIT_0522600:organism=Plasmodium_falciparum_IT:gene_product=conserved_Plasmodium_protein__unknown_function:transcript_product=conserved_Plasmodium_protein__unknown_function:location=PfIT_05_v3:914432-942895(+):protein_length=9310:sequence_SO=chromosome:SO=protein_coding_seq326	PFIT_0522600.1-p1	(8126, 8187)	PFIT_0522600.1-p1conserved_Plasmodium_protein__unknown_function	TYKNLFQLERKKLNEHKCNNISSIQPLIEENETFFEKQFNNSNSLGKENSSNYEKSINQNRD
PF3D7_1240400.1-p1:transcript=PF3D7_1240400.1:gene=PF3D7_1240400:organism=Plasmodium_falciparum_3D7:gene_product=erythrocyte_membrane_protein_1__PfEMP1:transcript_product=erythrocyte_membrane_protein_1__PfEMP1:location=Pf3D7_12_v3:1704512-1712490(+):protein_length=2287:sequence_SO=chromosome:SO=protein_coding_seq37	PF3D7_1240400.1-p1	(901, 962)	var	KQKYAKNNSRLGWKCVTPSGDQKATSEGNGDANRRVARQTSESGEKSGDKDGAICIPPRRRR
IT4var64_seq50	IT4var64	(1226, 1287)	var	NYKDQCTCTDKSTPPRRRHRLRSGQVVRGRQVVRGRQVVRGRQVVRGRSGRDFVVGQEEEEE
RAJ116var10_seq78	RAJ116var10	(1926, 1987)	var	SYSGTIGSISDKTSPYSGIDLINDSLNSNKVDIYDEVLKRKENELFGTNHPKHTNTHSVTKS
IGHvar14_seq12	IGHvar14	(276, 337)	var	KKSDDTIVFTDNRKCGHYEGDPPTNLDYVPQFLRWYDEWAEEFCRKRKIKLKNIKDVCRNES
IGHvar14_seq17	IGHvar14	(401, 462)	var	VSNKSKFVGNINNEYYKDFYTKLKNNYETLEKFLNLLNEGKYCKEALPEEEVINFTKTDEKE
PF3D7_1341600.1-p1:transcript=PF3D7_1341600.1:gene=PF3D7_1341600:organism=Plasmodium_falciparum_3D7:gene_product=GPI_mannosyltransferase_3:transcript_product=GPI_mannosyltransferase_3:location=Pf3D7_13_v3:1642119-1644479(+):protein_length=786:sequence_SO=chromosome:SO=protein_coding_seq11	PF3D7_1341600.1-p1	(251, 312)	GPI_mannosyltransferase_3	KGKKHLNEWTNLKERRNDHHFDTYENNFIYHKGTQNCKQYDKNMVDQNVCGQNMVDHIIQNR
PFIT_1034800.1-p1:transcript=PFIT_1034800.1:gene=PFIT_1034800:organism=Plasmodium_falciparum_IT:gene_product=merozoite_surface_protein_3:transcript_product=merozoite_surface_protein_3:location=PfIT_10_v3:1337251-1338396(+):protein_length=381:sequence_SO=chromosome:SO=protein_coding_seq10	PFIT_1034800.1-p1	(226, 287)	merozoite_surface_protein_3	GGVPEHKKEENMLSHLYVSSKDKENISKENDDVLDEKEEEAEETEEEELEEKNEEETESEIS
PF3D7_0114000.1-p1:transcript=PF3D7_0114000.1:gene=PF3D7_0114000:organism=Plasmodium_falciparum_3D7:gene_product=exported_protein_family_1:transcript_product=exported_protein_family_1:location=Pf3D7_01_v3:542480-546983(+):protein_length=1463:sequence_SO=chromosome:SO=protein_coding_seq18	PF3D7_0114000.1-p1	(426, 487)	exported_protein_family_1	EDMEDKEEEGKKEESEDKENAEELGKREVSEDKENAEEVREEEASEDKEDAEELGKGEVSED
PF3D7_0114000.1-p1:transcript=PF3D7_0114000.1:gene=PF3D7_0114000:organism=Plasmodium_falciparum_3D7:gene_product=exported_protein_family_1:transcript_product=exported_protein_family_1:location=Pf3D7_01_v3:542480-546983(+):protein_length=1463:sequence_SO=chromosome:SO=protein_coding_seq19	PF3D7_0114000.1-p1	(451, 512)	exported_protein_family_1	KREVSEDKENAEEVREEEASEDKEDAEELGKGEVSEDIEDKEEEGEKEESEDKGDKEEEGKK
PF3D7_0114000.1-p1:transcript=PF3D7_0114000.1:gene=PF3D7_0114000:organism=Plasmodium_falciparum_3D7:gene_product=exported_protein_family_1:transcript_product=exported_protein_family_1:location=Pf3D7_01_v3:542480-546983(+):protein_length=1463:sequence_SO=chromosome:SO=protein_coding_seq17	PF3D7_0114000.1-p1	(401, 462)	exported_protein_family_1	AEEVREEEASEDKEDAEELGKGEVSEDMEDKEEEGKKEESEDKENAEELGKREVSEDKENAE
anofar_SG1a:AFAF017561:to_be_corrected:_seq14	anopheles	(326, 387)	anopheles protein	LEIMKQIKQRNKKNFHDRLVALAKQVDICEQFMRDQKGDLSGADDLVKLKRQFADPDSTKSY
PF3D7_1336200.1-p1:transcript=PF3D7_1336200.1:gene=PF3D7_1336200:organism=Plasmodium_falciparum_3D7:gene_product=conserved_Plasmodium_protein__unknown_function:transcript_product=conserved_Plasmodium_protein__unknown_function:location=Pf3D7_13_v3:1474274-1475661(+):protein_length=297:sequence_SO=chromosome:SO=protein_coding_seq4	PF3D7_1336200.1-p1	(76, 137)	PF3D7_1336200.1-p1conserved_Plasmodium_protein__unknown_function	KRKRKESKRDIYKEKVKYDKKESNSNDENKNDRGNEKDRKNNSDIENNSDSEYINDKEKDRK
PF3D7_1364400.1-p1:transcript=PF3D7_1364400.1:gene=PF3D7_1364400:organism=Plasmodium_falciparum_3D7:gene_product=conserved_Plasmodium_protein__unknown_function:transcript_product=conserved_Plasmodium_protein__unknown_function:location=Pf3D7_13_v3:2585032-2594829(+):protein_length=3265:sequence_SO=chromosome:SO=protein_coding_seq77	PF3D7_1364400.1-p1	(1901, 1962)	PF3D7_1364400.1-p1conserved_Plasmodium_protein__unknown_function	FLKYFTIKKKFTDIVITKINFLYSKLKEKKKKICHMLITKEIKNNDMLYPYLNKCIEENCVN
PF3D7_1100300.1-p1:transcript=PF3D7_1100300.1:gene=PF3D7_1100300:organism=Plasmodium_falciparum_3D7:gene_product=rifin:transcript_product=rifin:location=Pf3D7_11_v3:45056-46233(+):protein_length=340:sequence_SO=chromosome:SO=protein_coding_seq4	PF3D7_1100300.1-p1	(76, 137)	rifin	RMKTTRQKCKDKCDKEIQKIILKDKLEKQMAQQFSTLHTDIQSDAIPTCVCEKSLADKVEKG
PF3D7_0917900.1-p1:transcript=PF3D7_0917900.1:gene=PF3D7_0917900:organism=Plasmodium_falciparum_3D7:gene_product=heat_shock_protein_70:transcript_product=heat_shock_protein_70:location=Pf3D7_09_v3:737985-740276(+):protein_length=652:sequence_SO=chromosome:SO=protein_coding_seq25	PF3D7_0917900.1-p1	(601, 662)	heat_shock_protein_70	LSAVKDAEDWLNNNSNADSEALKQKLKDLEAVCQPIIVKLYGQPGGPSPQPSGDEDVDSDEL
PF3D7_0100800.1-p1:transcript=PF3D7_0100800.1:gene=PF3D7_0100800:organism=Plasmodium_falciparum_3D7:gene_product=rifin:transcript_product=rifin:location=Pf3D7_01_v3:59772-61003(+):protein_length=344:sequence_SO=chromosome:SO=protein_coding_seq3	PF3D7_0100800.1-p1	(51, 112)	rifin	APSNYENDSEMKEVMEIFDRQTSERFREYDERMQHKRKQCKEQCEKDIQKIILKDKIEKELT
PF3D7_0100800.1-p1:transcript=PF3D7_0100800.1:gene=PF3D7_0100800:organism=Plasmodium_falciparum_3D7:gene_product=rifin:transcript_product=rifin:location=Pf3D7_01_v3:59772-61003(+):protein_length=344:sequence_SO=chromosome:SO=protein_coding_seq4	PF3D7_0100800.1-p1	(76, 137)	rifin	FREYDERMQHKRKQCKEQCEKDIQKIILKDKIEKELTEKFGALQTDIRTEDIPTCVCEKSVA
PFIT_0207000.1-p1:transcript=PFIT_0207000.1:gene=PFIT_0207000:organism=Plasmodium_falciparum_IT:gene_product=serine_repeat_antigen_4:transcript_product=serine_repeat_antigen_4:location=PfIT_02_v3:255047-258361(-):protein_length=970:sequence_SO=chromosome:SO=protein_coding_seq31	PFIT_0207000.1-p1	(751, 812)	serine_repeat_antigen_4	SPEFYHNLYYKTFNSNKEEKSMNKNSYVYGQDTTPVENEAPGSGVQKPTELSSTESQTVSPP
PFIT_1036200.1-p1:transcript=PFIT_1036200.1:gene=PFIT_1036200:organism=Plasmodium_falciparum_IT:gene_product=DNA_polymerase_zeta_catalytic_subunit__putative:transcript_product=DNA_polymerase_zeta_catalytic_subunit__putative:location=PfIT_10_v3:1393016-1400289(+):protein_length=2245:sequence_SO=chromosome:SO=protein_coding_seq76	PFIT_1036200.1-p1	(1876, 1937)	PFIT_1036200.1-p1DNA_polymerase_zeta_catalytic_subunit__putative	VSHPHFIRGIYRSFRFDCGSTEQLEISEDNCNNDSEKNGDIEKNDNIEKNDNIEKIGDIEKI
PF3D7_1149000.1-p1:transcript=PF3D7_1149000.1:gene=PF3D7_1149000:organism=Plasmodium_falciparum_3D7:gene_product=antigen_332__DBL-like_protein:transcript_product=antigen_332__DBL-like_protein:location=Pf3D7_11_v3:1950210-1968726(+):protein_length=6093:sequence_SO=chromosome:SO=protein_coding_seq114	PF3D7_1149000.1-p1	(2826, 2887)	antigen_332__DBL-like_protein	TEEVEEEGSVVEEIVEEEGSVVEEIVEEEGSVSEVVDETELVNDEIVEQAPFTEEVEEQVSV
PF3D7_1149000.1-p1:transcript=PF3D7_1149000.1:gene=PF3D7_1149000:organism=Plasmodium_falciparum_3D7:gene_product=antigen_332__DBL-like_protein:transcript_product=antigen_332__DBL-like_protein:location=Pf3D7_11_v3:1950210-1968726(+):protein_length=6093:sequence_SO=chromosome:SO=protein_coding_seq111	PF3D7_1149000.1-p1	(2751, 2812)	antigen_332__DBL-like_protein	GSVSGEVDETEYVTEEVEEEGSVVEEIVEEEGSVSGEVDETEYVTEEVEEEGSVVEEIVEEE
PF3D7_1149000.1-p1:transcript=PF3D7_1149000.1:gene=PF3D7_1149000:organism=Plasmodium_falciparum_3D7:gene_product=antigen_332__DBL-like_protein:transcript_product=antigen_332__DBL-like_protein:location=Pf3D7_11_v3:1950210-1968726(+):protein_length=6093:sequence_SO=chromosome:SO=protein_coding_seq110	PF3D7_1149000.1-p1	(2726, 2787)	antigen_332__DBL-like_protein	VDETEYVTEEVEEEGSVVEEIVEEEGSVSGEVDETEYVTEEVEEEGSVVEEIVEEEGSVSGE
PFCLINvar62_seq9	PFCLINvar62	(201, 262)	var	RDMFKRNNHDNVEKGLREVFKKIHEDLSPEVQKHYEDDGSVNYYKLREDWWNVNREQVWKAI
PFIT_1107300.1-p1:transcript=PFIT_1107300.1:gene=PFIT_1107300:organism=Plasmodium_falciparum_IT:gene_product=conserved_Plasmodium_protein__unknown_function:transcript_product=conserved_Plasmodium_protein__unknown_function:location=PfIT_11_v3:201226-207430(-):protein_length=1987:sequence_SO=chromosome:SO=protein_coding_seq7	PFIT_1107300.1-p1	(151, 212)	PFIT_1107300.1-p1conserved_Plasmodium_protein__unknown_function	GLQNLMNQKVVENNKMDENIKMDENKKMDENIKMDENKKMDENIKMDENIKMDENIKMDENI
PF3D7_1442600.1-p1:transcript=PF3D7_1442600.1:gene=PF3D7_1442600:organism=Plasmodium_falciparum_3D7:gene_product=TRAP-like_protein:transcript_product=TRAP-like_protein:location=Pf3D7_14_v3:1730087-1740916(+):protein_length=3543:sequence_SO=chromosome:SO=protein_coding_seq72	PF3D7_1442600.1-p1	(1776, 1837)	TRAP-like_protein	DESLEKIKEENGNTRKNKGSINNEEKIEEEKENVKNDETIIGKKEENTESDDLKIQKISNEN
PF3D7_1442600.1-p1:transcript=PF3D7_1442600.1:gene=PF3D7_1442600:organism=Plasmodium_falciparum_3D7:gene_product=TRAP-like_protein:transcript_product=TRAP-like_protein:location=Pf3D7_14_v3:1730087-1740916(+):protein_length=3543:sequence_SO=chromosome:SO=protein_coding_seq73	PF3D7_1442600.1-p1	(1801, 1862)	TRAP-like_protein	KIEEEKENVKNDETIIGKKEENTESDDLKIQKISNENINKNILYTDNYNKDKSYNAQGGTHG
PF3D7_1319200.1-p1:transcript=PF3D7_1319200.1:gene=PF3D7_1319200:organism=Plasmodium_falciparum_3D7:gene_product=conserved_Plasmodium_protein__unknown_function:transcript_product=conserved_Plasmodium_protein__unknown_function:location=Pf3D7_13_v3:792381-794987(-):protein_length=868:sequence_SO=chromosome:SO=protein_coding_seq3	PF3D7_1319200.1-p1	(51, 112)	PF3D7_1319200.1-p1conserved_Plasmodium_protein__unknown_function	NNNNKKNNNNNNDEGLEKNTGKFYNKNKGFSYLKRDCNSLDTYYKAWDKLNIDDIDRNAEQI
PF3D7_1028700.1-p1:transcript=PF3D7_1028700.1:gene=PF3D7_1028700:organism=Plasmodium_falciparum_3D7:gene_product=merozoite_TRAP-like_protein:transcript_product=merozoite_TRAP-like_protein:location=Pf3D7_10_v3:1181005-1182501(+):protein_length=498:sequence_SO=chromosome:SO=protein_coding_seq17	PF3D7_1028700.1-p1	(401, 462)	merozoite_TRAP-like_protein	ALYEHMNTKDQEHTQHEQPNDSAHGHFEDYSKLYIASGVATLVLLGGSITFYFLRKEKTEKV
PF3D7_1028700.1-p1:transcript=PF3D7_1028700.1:gene=PF3D7_1028700:organism=Plasmodium_falciparum_3D7:gene_product=merozoite_TRAP-like_protein:transcript_product=merozoite_TRAP-like_protein:location=Pf3D7_10_v3:1181005-1182501(+):protein_length=498:sequence_SO=chromosome:SO=protein_coding_seq12	PF3D7_1028700.1-p1	(276, 337)	merozoite_TRAP-like_protein	YTSSSVHNSTNNERKSDEDLDNIEGDNITKEERIVPINNKNYDNHDEHSNIHEHDTSRNVDN
PF3D7_1028700.1-p1:transcript=PF3D7_1028700.1:gene=PF3D7_1028700:organism=Plasmodium_falciparum_3D7:gene_product=merozoite_TRAP-like_protein:transcript_product=merozoite_TRAP-like_protein:location=Pf3D7_10_v3:1181005-1182501(+):protein_length=498:sequence_SO=chromosome:SO=protein_coding_seq13	PF3D7_1028700.1-p1	(301, 362)	merozoite_TRAP-like_protein	DNITKEERIVPINNKNYDNHDEHSNIHEHDTSRNVDNEKYNSNDDLPNLSTYDYDMNNDSYK
PF3D7_1028700.1-p1:transcript=PF3D7_1028700.1:gene=PF3D7_1028700:organism=Plasmodium_falciparum_3D7:gene_product=merozoite_TRAP-like_protein:transcript_product=merozoite_TRAP-like_protein:location=Pf3D7_10_v3:1181005-1182501(+):protein_length=498:sequence_SO=chromosome:SO=protein_coding_seq19	PF3D7_1028700.1-p1	(451, 512)	merozoite_TRAP-like_protein	SGVATLVLLGGSITFYFLRKEKTEKVVQEETKEENFEVMFNDDALKGKDNKAMDEEEFWALE
PF3D7_0516000.1-p1:transcript=PF3D7_0516000.1:gene=PF3D7_0516000:organism=Plasmodium_falciparum_3D7:gene_product=RAP_protein__putative:transcript_product=RAP_protein__putative:location=Pf3D7_05_v3:663551-666917(+):protein_length=1084:sequence_SO=chromosome:SO=protein_coding_seq10	PF3D7_0516000.1-p1	(226, 287)	PF3D7_0516000.1-p1RAP_protein__putative	VKTRRGNEENEENGKNEENGKNEKNEENGKNEKNEENGKNEKNEKNEENGKNGKNGKNEKNE
PF3D7_1301200.1-p1:transcript=PF3D7_1301200.1:gene=PF3D7_1301200:organism=Plasmodium_falciparum_3D7:gene_product=glycophorin_binding_protein:transcript_product=glycophorin_binding_protein:location=Pf3D7_13_v3:73099-74413(-):protein_length=377:sequence_SO=chromosome:SO=protein_coding_seq11	PF3D7_1301200.1-p1	(251, 312)	glycophorin_binding_protein	QILTHTDPNDETSADPEGQIMKAWAADPEYLKHVNVLYQILTNTDPNDETSADPEGQIMKAW
PF3D7_0322200.1-p1:transcript=PF3D7_0322200.1:gene=PF3D7_0322200:organism=Plasmodium_falciparum_3D7:gene_product=conserved_Plasmodium_protein__unknown_function:transcript_product=conserved_Plasmodium_protein__unknown_function:location=Pf3D7_03_v3:933188-937006(-):protein_length=753:sequence_SO=chromosome:SO=protein_coding_seq9	PF3D7_0322200.1-p1	(201, 262)	PF3D7_0322200.1-p1conserved_Plasmodium_protein__unknown_function	HTNKTELSNQKTHNFKTQQTEKKYNNIHNYKNQKLKCKIIPDNYNNLSYSQNIKHVNNDLNK
HB3var47_seq30	HB3var47	(726, 787)	var	TDDIERIEALLKETGVAASGVSGIGGATGKNTKIDKFLQEELNEANRCKNCQETQKPGGDGA
PF3D7_1417600.1-p1:transcript=PF3D7_1417600.1:gene=PF3D7_1417600:organism=Plasmodium_falciparum_3D7:gene_product=conserved_Plasmodium_protein__unknown_function:transcript_product=conserved_Plasmodium_protein__unknown_function:location=Pf3D7_14_v3:730694-744682(-):protein_length=4662:sequence_SO=chromosome:SO=protein_coding_seq94	PF3D7_1417600.1-p1	(2326, 2387)	PF3D7_1417600.1-p1conserved_Plasmodium_protein__unknown_function	YYFDDYFDEHFEDYLDDYFEDEWDDYVDENFVDNSDEFFEEDVNEFKKINNIDENTTNNNST
PF3D7_0307700.1-p1:transcript=PF3D7_0307700.1:gene=PF3D7_0307700:organism=Plasmodium_falciparum_3D7:gene_product=conserved_Plasmodium_protein__unknown_function:transcript_product=conserved_Plasmodium_protein__unknown_function:location=Pf3D7_03_v3:328787-335269(-):protein_length=1826:sequence_SO=chromosome:SO=protein_coding_seq59	PF3D7_0307700.1-p1	(1451, 1512)	PF3D7_0307700.1-p1conserved_Plasmodium_protein__unknown_function	PQTIGQQLAEPINQQLNHQLSQQMNQQMNQQMNQQISHQMNAQLDQQMNHQMNHQMSHQMNQ
PF3D7_0526600.1-p1:transcript=PF3D7_0526600.1:gene=PF3D7_0526600:organism=Plasmodium_falciparum_3D7:gene_product=conserved_Plasmodium_protein__unknown_function:transcript_product=conserved_Plasmodium_protein__unknown_function:location=Pf3D7_05_v3:1101203-1114777(+):protein_length=4524:sequence_SO=chromosome:SO=protein_coding_seq162	PF3D7_0526600.1-p1	(4026, 4087)	PF3D7_0526600.1-p1conserved_Plasmodium_protein__unknown_function	TEYICSRYKKRICAGRDDSENNVSIKKNVKEDNVDKEEDKNVIVDDVVEKYIIDKVIVDYLK
PF3D7_0723700.1-p1:transcript=PF3D7_0723700.1:gene=PF3D7_0723700:organism=Plasmodium_falciparum_3D7:gene_product=metallo-hydrolase/oxidoreductase__putative:transcript_product=metallo-hydrolase/oxidoreductase__putative:location=Pf3D7_07_v3:988145-991243(+):protein_length=1032:sequence_SO=chromosome:SO=protein_coding_seq6	PF3D7_0723700.1-p1	(126, 187)	PF3D7_0723700.1-p1metallo-hydrolase/oxidoreductase__putative	LFINRYLVEEMLEDDNKKYEQENRENNNNNNNVEKDIQVDVTNNLLSKDNYFIDKKKKNIIN
PF3D7_1308400.1-p1:transcript=PF3D7_1308400.1:gene=PF3D7_1308400:organism=Plasmodium_falciparum_3D7:gene_product=conserved_Plasmodium_protein__unknown_function:transcript_product=conserved_Plasmodium_protein__unknown_function:location=Pf3D7_13_v3:373487-392072(-):protein_length=6147:sequence_SO=chromosome:SO=protein_coding_seq104	PF3D7_1308400.1-p1	(2576, 2637)	PF3D7_1308400.1-p1conserved_Plasmodium_protein__unknown_function	NIIKNKQKNVYVEKKITNDEYIKYNNIYNKEEATNMFLLSSAHNKLDNKLEKYMKQQKRSKR
IGHvar01_seq18	IGHvar01	(426, 487)	var	VRRQRRDARSTGSSSNYDGYESKFYEKLKETNYKDVEKFLEKLNEGICKKPPEASGETADAA
IGHvar01_seq12	IGHvar01	(276, 337)	var	KLSNASYFHATCSDSDGNSKSQANKYCRCNNDQPNDDKPNIDPPTYFDYVPQYLRWFEEWAE
IGHvar01_seq17	IGHvar01	(401, 462)	var	IDNQKEQFDKQKKKYETEISVGGSGVRRQRRDARSTGSSSNYDGYESKFYEKLKETNYKDVE
PFIT_0211500.1-p1:transcript=PFIT_0211500.1:gene=PFIT_0211500:organism=Plasmodium_falciparum_IT:gene_product=conserved_Plasmodium_protein__unknown_function:transcript_product=conserved_Plasmodium_protein__unknown_function:location=PfIT_02_v3:428637-434210(+):protein_length=1857:sequence_SO=chromosome:SO=protein_coding_seq19	PFIT_0211500.1-p1	(451, 512)	PFIT_0211500.1-p1conserved_Plasmodium_protein__unknown_function	VNMQNENHFNVMNDEMKNYNNVKRINSISHIPYMNNLKNYNEHTSMVKGKGNTNRKKSNNLK
PF3D7_0201900.1-p1:transcript=PF3D7_0201900.1:gene=PF3D7_0201900:organism=Plasmodium_falciparum_3D7:gene_product=erythrocyte_membrane_protein_3:transcript_product=erythrocyte_membrane_protein_3:location=Pf3D7_02_v3:91318-98838(-):protein_length=2441:sequence_SO=chromosome:SO=protein_coding_seq29	PF3D7_0201900.1-p1	(701, 762)	erythrocyte_membrane_protein_3	VDEYDQTELAKGKEVTNKPHENLEEYNETDLAKGKEVTNKPHESVDEYDQSELAKGKDITNK
PF3D7_0201900.1-p1:transcript=PF3D7_0201900.1:gene=PF3D7_0201900:organism=Plasmodium_falciparum_3D7:gene_product=erythrocyte_membrane_protein_3:transcript_product=erythrocyte_membrane_protein_3:location=Pf3D7_02_v3:91318-98838(-):protein_length=2441:sequence_SO=chromosome:SO=protein_coding_seq28	PF3D7_0201900.1-p1	(676, 737)	erythrocyte_membrane_protein_3	HESVDEYDQSELAKGKDITNKPHESVDEYDQTELAKGKEVTNKPHENLEEYNETDLAKGKEV
PF3D7_0201900.1-p1:transcript=PF3D7_0201900.1:gene=PF3D7_0201900:organism=Plasmodium_falciparum_3D7:gene_product=erythrocyte_membrane_protein_3:transcript_product=erythrocyte_membrane_protein_3:location=Pf3D7_02_v3:91318-98838(-):protein_length=2441:sequence_SO=chromosome:SO=protein_coding_seq25	PF3D7_0201900.1-p1	(601, 662)	erythrocyte_membrane_protein_3	REYQLDNEVRDELPEYEKGHVSREYQLDNEVRDELPEYEKGHVSREYQLDNEGPSTLKEYDQ
PF3D7_0201900.1-p1:transcript=PF3D7_0201900.1:gene=PF3D7_0201900:organism=Plasmodium_falciparum_3D7:gene_product=erythrocyte_membrane_protein_3:transcript_product=erythrocyte_membrane_protein_3:location=Pf3D7_02_v3:91318-98838(-):protein_length=2441:sequence_SO=chromosome:SO=protein_coding_seq27	PF3D7_0201900.1-p1	(651, 712)	erythrocyte_membrane_protein_3	NEGPSTLKEYDQTELAKGKDITNKPHESVDEYDQSELAKGKDITNKPHESVDEYDQTELAKG
PFIT_0400600.1-p1:transcript=PFIT_0400600.1:gene=PFIT_0400600:organism=Plasmodium_falciparum_IT:gene_product=acyl-CoA_synthetase:transcript_product=acyl-CoA_synthetase:location=PfIT_04_v3:138732-141671(-):protein_length=979:sequence_SO=chromosome:SO=protein_coding_seq10	PFIT_0400600.1-p1	(226, 287)	PFIT_0400600.1-p1acyl-CoA_synthetase	DEKKYEGLRKDSNNKKNNKNNKDNKNNKGNKNNKDNKNNKGNKNNKDNEKNHHHHNNNNSIN
PF3D7_0416100.1-p1:transcript=PF3D7_0416100.1:gene=PF3D7_0416100:organism=Plasmodium_falciparum_3D7:gene_product=glutamyl-tRNA(Gln)_amidotransferase_subunit_A:transcript_product=glutamyl-tRNA(Gln)_amidotransferase_subunit_A:location=Pf3D7_04_v3:706529-709009(+):protein_length=826:sequence_SO=chromosome:SO=protein_coding_seq19	PF3D7_0416100.1-p1	(451, 512)	glutamyl-tRNA(Gln)_amidotransferase_subunit_A	DEHKKDDDNIRNNIICDDHKKDDDNIRNNIICDDHKKDDDNIRNNVKCNDHKKDDDNIRNNV
PF3D7_1200400.1-p1:transcript=PF3D7_1200400.1:gene=PF3D7_1200400:organism=Plasmodium_falciparum_3D7:gene_product=erythrocyte_membrane_protein_1__PfEMP1:transcript_product=erythrocyte_membrane_protein_1__PfEMP1:location=Pf3D7_12_v3:32703-41940(+):protein_length=2860:sequence_SO=chromosome:SO=protein_coding_seq103	PF3D7_1200400.1-p1	(2551, 2612)	var	VLEPSKRDTQNDIPNDIQNDIQSDGIPSSKITDNEWNTLKDEFISQYLQSEQPNDYKNGNIP
PF3D7_1200400.1-p1:transcript=PF3D7_1200400.1:gene=PF3D7_1200400:organism=Plasmodium_falciparum_3D7:gene_product=erythrocyte_membrane_protein_1__PfEMP1:transcript_product=erythrocyte_membrane_protein_1__PfEMP1:location=Pf3D7_12_v3:32703-41940(+):protein_length=2860:sequence_SO=chromosome:SO=protein_coding_seq104	PF3D7_1200400.1-p1	(2576, 2637)	var	IPSSKITDNEWNTLKDEFISQYLQSEQPNDYKNGNIPLNTQPNTLYFDKPEEKPFITSIHDR
PF3D7_1200400.1-p1:transcript=PF3D7_1200400.1:gene=PF3D7_1200400:organism=Plasmodium_falciparum_3D7:gene_product=erythrocyte_membrane_protein_1__PfEMP1:transcript_product=erythrocyte_membrane_protein_1__PfEMP1:location=Pf3D7_12_v3:32703-41940(+):protein_length=2860:sequence_SO=chromosome:SO=protein_coding_seq107	PF3D7_1200400.1-p1	(2651, 2712)	var	MVNSMDDIPINRDNNVYSGIDLINDALNGDYDIYDELLKRKENELFGKNYKKNTSNNSVAKL
PF3D7_1200400.1-p1:transcript=PF3D7_1200400.1:gene=PF3D7_1200400:organism=Plasmodium_falciparum_3D7:gene_product=erythrocyte_membrane_protein_1__PfEMP1:transcript_product=erythrocyte_membrane_protein_1__PfEMP1:location=Pf3D7_12_v3:32703-41940(+):protein_length=2860:sequence_SO=chromosome:SO=protein_coding_seq108	PF3D7_1200400.1-p1	(2676, 2737)	var	ALNGDYDIYDELLKRKENELFGKNYKKNTSNNSVAKLTNSDPIMNQLDLLHKWLDRHRDMCE
PFIT_0701200.1-p1:transcript=PFIT_0701200.1:gene=PFIT_0701200:organism=Plasmodium_falciparum_IT:gene_product=sporozoite_threonine_and_asparagine-rich_protein:transcript_product=sporozoite_threonine_and_asparagine-rich_protein:location=PfIT_07_v3:129239-131085(+):protein_length=559:sequence_SO=chromosome:SO=protein_coding_seq12	PFIT_0701200.1-p1	(276, 337)	sporozoite_threonine_and_asparagine-rich_protein	TNTNVISTDNSKTNVISTDNSKTNTISTDNDNADTILTDNDNNTDIILTDNNNTDTISTDND
PFIT_0701200.1-p1:transcript=PFIT_0701200.1:gene=PFIT_0701200:organism=Plasmodium_falciparum_IT:gene_product=sporozoite_threonine_and_asparagine-rich_protein:transcript_product=sporozoite_threonine_and_asparagine-rich_protein:location=PfIT_07_v3:129239-131085(+):protein_length=559:sequence_SO=chromosome:SO=protein_coding_seq13	PFIT_0701200.1-p1	(301, 362)	sporozoite_threonine_and_asparagine-rich_protein	ISTDNDNADTILTDNDNNTDIILTDNNNTDTISTDNDNADTKATDNNNNTNTKATDNNNTKI
PF3D7_1437000.1-p1:transcript=PF3D7_1437000.1:gene=PF3D7_1437000:organism=Plasmodium_falciparum_3D7:gene_product=N-acetyltransferase__putative:transcript_product=N-acetyltransferase__putative:location=Pf3D7_14_v3:1502648-1504861(+):protein_length=544:sequence_SO=chromosome:SO=protein_coding_seq5	PF3D7_1437000.1-p1	(101, 162)	PF3D7_1437000.1-p1N-acetyltransferase__putative	IRAKLEFLNHIRKDCPDLENLYKSYINVEGCNFWVAEVYDNNFGSASRTTCSDIHEREKIIL
HB3var08_seq1	HB3var08	(1, 62)	var	MVIQKTGGGGRIEDTTAKHIFDRIGKDVYDEIVEKGDAEKYYDDLHGSLKDARFEKDPNGQQ
PF3D7_0825000.1-p1:transcript=PF3D7_0825000.1:gene=PF3D7_0825000:organism=Plasmodium_falciparum_3D7:gene_product=conserved_Plasmodium_protein__unknown_function:transcript_product=conserved_Plasmodium_protein__unknown_function:location=Pf3D7_08_v3:1086048-1091248(+):protein_length=1664:sequence_SO=chromosome:SO=protein_coding_seq32	PF3D7_0825000.1-p1	(776, 837)	PF3D7_0825000.1-p1conserved_Plasmodium_protein__unknown_function	YFDMMKPGVVDNIINIKENELVLQKNEKKKDIFNKSHGNEKIEPLKDFNNKNVKVTNILKNK
PFCLINvar25_seq17	PFCLINvar25	(401, 462)	var	KYTNGTTNSKGKKRNTRGGSNYDGYEKKFYKKMKEKNNYETVENFLDLLNNETTCTKNSEIE
PF3D7_1446500.1-p1:transcript=PF3D7_1446500.1:gene=PF3D7_1446500:organism=Plasmodium_falciparum_3D7:gene_product=conserved_Plasmodium_protein__unknown_function:transcript_product=conserved_Plasmodium_protein__unknown_function:location=Pf3D7_14_v3:1907197-1916202(+):protein_length=3001:sequence_SO=chromosome:SO=protein_coding_seq58	PF3D7_1446500.1-p1	(1426, 1487)	PF3D7_1446500.1-p1conserved_Plasmodium_protein__unknown_function	KDDKDKATIFGSPSNKDDKDKATIFGFSSNKDDKDKAPIFGFSSNKDDKDKAPIFGSPSNKD
PFIT_0802100.1-p1:transcript=PFIT_0802100.1:gene=PFIT_0802100:organism=Plasmodium_falciparum_IT:gene_product=Plasmodium_exported_protein__unknown_function:transcript_product=Plasmodium_exported_protein__unknown_function:location=PfIT_08_v3:75365-76103(+):protein_length=204:sequence_SO=chromosome:SO=protein_coding_seq5	PFIT_0802100.1-p1	(101, 162)	PFIT_0802100.1-p1Plasmodium_exported_protein__unknown_function	KNHYTEHVSSLNNGSHRNSIQTLRGKLEFYDNLFIDKMLDLRIQKKHSPLLYLLLLTLFDLY
PFIT_0722000.1-p1:transcript=PFIT_0722000.1:gene=PFIT_0722000:organism=Plasmodium_falciparum_IT:gene_product=conserved_Plasmodium_protein__unknown_function:transcript_product=conserved_Plasmodium_protein__unknown_function:location=PfIT_07_v3:977521-984576(+):protein_length=2201:sequence_SO=chromosome:SO=protein_coding_seq29	PFIT_0722000.1-p1	(701, 762)	PFIT_0722000.1-p1conserved_Plasmodium_protein__unknown_function	IVNDEIVNDEIVNDEIVDDEIVDDKIVNDKIVNDKIVNNKIVNDKIVNDKIVNDKIVNDKIV
PFIT_0722000.1-p1:transcript=PFIT_0722000.1:gene=PFIT_0722000:organism=Plasmodium_falciparum_IT:gene_product=conserved_Plasmodium_protein__unknown_function:transcript_product=conserved_Plasmodium_protein__unknown_function:location=PfIT_07_v3:977521-984576(+):protein_length=2201:sequence_SO=chromosome:SO=protein_coding_seq28	PFIT_0722000.1-p1	(676, 737)	PFIT_0722000.1-p1conserved_Plasmodium_protein__unknown_function	IVNEENKSGDSNEQDINNDEIVNDEIVNDEIVNDEIVNDEIVDDEIVDDKIVNDKIVNDKIV
PFIT_1021200.1-p1:transcript=PFIT_1021200.1:gene=PFIT_1021200:organism=Plasmodium_falciparum_IT:gene_product=conserved_Plasmodium_membrane_protein__unknown_function:transcript_product=conserved_Plasmodium_membrane_protein__unknown_function:location=PfIT_10_v3:808026-829921(-):protein_length=6944:sequence_SO=chromosome:SO=protein_coding_seq206	PFIT_1021200.1-p1	(5126, 5187)	PFIT_1021200.1-p1conserved_Plasmodium_membrane_protein__unknown_function	VNKNNEETETSDYYIEHNENKKNIELSSHDNNSFDNEKRKTSLGMTKSKGYNDLFTVKFRKS
PFIT_1021200.1-p1:transcript=PFIT_1021200.1:gene=PFIT_1021200:organism=Plasmodium_falciparum_IT:gene_product=conserved_Plasmodium_membrane_protein__unknown_function:transcript_product=conserved_Plasmodium_membrane_protein__unknown_function:location=PfIT_10_v3:808026-829921(-):protein_length=6944:sequence_SO=chromosome:SO=protein_coding_seq207	PFIT_1021200.1-p1	(5151, 5212)	PFIT_1021200.1-p1conserved_Plasmodium_membrane_protein__unknown_function	LSSHDNNSFDNEKRKTSLGMTKSKGYNDLFTVKFRKSVNENDKIDEYKENSFEDSSTYNDSF
PFIT_0712700.1-p1:transcript=PFIT_0712700.1:gene=PFIT_0712700:organism=Plasmodium_falciparum_IT:gene_product=conserved_Plasmodium_protein__unknown_function:transcript_product=conserved_Plasmodium_protein__unknown_function:location=PfIT_07_v3:653944-655599(+):protein_length=551:sequence_SO=chromosome:SO=protein_coding_seq8	PFIT_0712700.1-p1	(176, 237)	PFIT_0712700.1-p1conserved_Plasmodium_protein__unknown_function	SSGSYKSSDSSKSSDSSKSSGSSKSSGSSKSSDSSKSSDSSKSSDSSKSSDSSKSSDSDNSS
PFIT_0712700.1-p1:transcript=PFIT_0712700.1:gene=PFIT_0712700:organism=Plasmodium_falciparum_IT:gene_product=conserved_Plasmodium_protein__unknown_function:transcript_product=conserved_Plasmodium_protein__unknown_function:location=PfIT_07_v3:653944-655599(+):protein_length=551:sequence_SO=chromosome:SO=protein_coding_seq7	PFIT_0712700.1-p1	(151, 212)	PFIT_0712700.1-p1conserved_Plasmodium_protein__unknown_function	MSDVISSKRYSDKSSDSSKSSGSSKSSGSYKSSDSSKSSDSSKSSGSSKSSGSSKSSDSSKS
PF3D7_1372400.1-p1:transcript=PF3D7_1372400.1:gene=PF3D7_1372400:organism=Plasmodium_falciparum_3D7:gene_product=acyl-CoA_synthetase:transcript_product=acyl-CoA_synthetase:location=Pf3D7_13_v3:2850891-2853482(+):protein_length=863:sequence_SO=chromosome:SO=protein_coding_seq9	PF3D7_1372400.1-p1	(201, 262)	PF3D7_1372400.1-p1acyl-CoA_synthetase	LKNLIILDTLSKNKEINLNKEENNNDKKNKSSGNSTSVKGNDLSNMIEITCSGPLEYDKEKL
IGHvar25_seq74	IGHvar25	(1826, 1887)	var	KYKTLIEVVLEPSKSDGHIPHSAGSPLGDGDSNPLGDDMVGTTIFTDEEWSELKHDFISQYI
PFIT_1430100.1-p1:transcript=PFIT_1430100.1:gene=PFIT_1430100:organism=Plasmodium_falciparum_IT:gene_product=conserved_Plasmodium_protein__unknown_function:transcript_product=conserved_Plasmodium_protein__unknown_function:location=PfIT_14_v3:1160939-1165267(-):protein_length=1442:sequence_SO=chromosome:SO=protein_coding_seq13	PFIT_1430100.1-p1	(301, 362)	PFIT_1430100.1-p1conserved_Plasmodium_protein__unknown_function	TEESSMEHQTNYLYVDKEEENIKDDNKYDKRDNKKGYLQDESKNNKINDSSIIGSISHTNNN
PF3D7_1448500.1-p1:transcript=PF3D7_1448500.1:gene=PF3D7_1448500:organism=Plasmodium_falciparum_3D7:gene_product=conserved_Plasmodium_protein__unknown_function:transcript_product=conserved_Plasmodium_protein__unknown_function:location=Pf3D7_14_v3:1984189-1995574(-):protein_length=3704:sequence_SO=chromosome:SO=protein_coding_seq91	PF3D7_1448500.1-p1	(2251, 2312)	PF3D7_1448500.1-p1conserved_Plasmodium_protein__unknown_function	NTHKNLLHNNLNPKDVINNNIEKEEVLYDTFIKTNDNTEIVDDRLSFFNDNLDVEDDKYYHF
DD2var50_seq73	DD2var50	(1801, 1862)	var	FKKEKEKKESYVIGQIEFDEEEEDPQSQLERGQIPDEFKRQMFYTFGDYRDICLGKDIGSDV
IGHvar23_seq54	IGHvar23	(1326, 1387)	var	VETHFAWHRYKEDNKKAEDELKKGTIPEEFKRQMFYTFGDYRDLCLDKNIGSDVSDVESKIK
PFIT_0108600.1-p1:transcript=PFIT_0108600.1:gene=PFIT_0108600:organism=Plasmodium_falciparum_IT:gene_product=selenocysteine-specific_elongation_factor_selB_homologue__putative:transcript_product=selenocysteine-specific_elongation_factor_selB_homologue__putative:location=PfIT_01_v3:330032-332536(-):protein_length=834:sequence_SO=chromosome:SO=protein_coding_seq11	PFIT_0108600.1-p1	(251, 312)	PFIT_0108600.1-p1selenocysteine-specific_elongation_factor_selB_homologue__putative	GDPPNLLNDDKKDPPNLLNDDKKDPSILLSDDKKDPPNLLNDDKKDPPNLLNDDKKDPSILL
anocul_epoxy_hydrolase:ACUA004043:to_be_corrected:_seq2	anopheles	(26, 87)	anopheles protein	WLNVTYWIPTPRPNPPDTLNHSKWGIHRYIEVNDIKLHYVEKGSSSKPMMLFLHGVPDFWYT
PF3D7_1348300.1-p1:transcript=PF3D7_1348300.1:gene=PF3D7_1348300:organism=Plasmodium_falciparum_3D7:gene_product=elongation_factor_Tu__putative:transcript_product=elongation_factor_Tu__putative:location=Pf3D7_13_v3:1929091-1933721(-):protein_length=1394:sequence_SO=chromosome:SO=protein_coding_seq6	PF3D7_1348300.1-p1	(126, 187)	PF3D7_1348300.1-p1elongation_factor_Tu__putative	IKSNDIQSNDIKSNDIQSNDIQSNDKQSNDKQSNDIQSNDIQSNDKQSNDIKSSDNIINSDN
PF3D7_1348300.1-p1:transcript=PF3D7_1348300.1:gene=PF3D7_1348300:organism=Plasmodium_falciparum_3D7:gene_product=elongation_factor_Tu__putative:transcript_product=elongation_factor_Tu__putative:location=Pf3D7_13_v3:1929091-1933721(-):protein_length=1394:sequence_SO=chromosome:SO=protein_coding_seq7	PF3D7_1348300.1-p1	(151, 212)	PF3D7_1348300.1-p1elongation_factor_Tu__putative	KQSNDKQSNDIQSNDIQSNDKQSNDIKSSDNIINSDNINSGQNIPKEEKNNMDTFSINIIDT
PF3D7_1017600.1-p1:transcript=PF3D7_1017600.1:gene=PF3D7_1017600:organism=Plasmodium_falciparum_3D7:gene_product=conserved_Plasmodium_protein__unknown_function:transcript_product=conserved_Plasmodium_protein__unknown_function:location=Pf3D7_10_v3:705537-708452(+):protein_length=971:sequence_SO=chromosome:SO=protein_coding_seq13	PF3D7_1017600.1-p1	(301, 362)	PF3D7_1017600.1-p1conserved_Plasmodium_protein__unknown_function	ENEKNEENEKNEKNEENEKNEENEKNEKNETKEHPTVNPVFNNNDIKQNILKEDEKDIDFLF
PFIT_0413800.1-p1:transcript=PFIT_0413800.1:gene=PFIT_0413800:organism=Plasmodium_falciparum_IT:gene_product=conserved_Plasmodium_protein__unknown_function:transcript_product=conserved_Plasmodium_protein__unknown_function:location=PfIT_04_v3:698971-705489(-):protein_length=2172:sequence_SO=chromosome:SO=protein_coding_seq12	PFIT_0413800.1-p1	(276, 337)	PFIT_0413800.1-p1conserved_Plasmodium_protein__unknown_function	NDNNKNDDNNKNNDNNKNNDNNKNNDNNNNDNNNNNNNSERDVCYSSNNKHCNSEKRLNQEK
PF3D7_0808700.1-p1:transcript=PF3D7_0808700.1:gene=PF3D7_0808700:organism=Plasmodium_falciparum_3D7:gene_product=erythrocyte_membrane_protein_1__PfEMP1:transcript_product=erythrocyte_membrane_protein_1__PfEMP1:location=Pf3D7_08_v3:440408-448062(+):protein_length=2231:sequence_SO=chromosome:SO=protein_coding_seq81	PF3D7_0808700.1-p1	(2001, 2062)	var	NVYSGIDLINDTLSGNKHIDIYDEVLKRKENELFGTNHVKQTSIHSVAKLTNSDPIHKQLDL
PF3D7_0808700.1-p1:transcript=PF3D7_0808700.1:gene=PF3D7_0808700:organism=Plasmodium_falciparum_3D7:gene_product=erythrocyte_membrane_protein_1__PfEMP1:transcript_product=erythrocyte_membrane_protein_1__PfEMP1:location=Pf3D7_08_v3:440408-448062(+):protein_length=2231:sequence_SO=chromosome:SO=protein_coding_seq80	PF3D7_0808700.1-p1	(1976, 2037)	var	LYTGEEYNYNVNMVNSMDDTKYVSNNVYSGIDLINDTLSGNKHIDIYDEVLKRKENELFGTN
PF3D7_0321800.1-p1:transcript=PF3D7_0321800.1:gene=PF3D7_0321800:organism=Plasmodium_falciparum_3D7:gene_product=WD_repeat-containing_protein__putative:transcript_product=WD_repeat-containing_protein__putative:location=Pf3D7_03_v3:912916-921036(+):protein_length=2706:sequence_SO=chromosome:SO=protein_coding_seq45	PF3D7_0321800.1-p1	(1101, 1162)	PF3D7_0321800.1-p1WD_repeat-containing_protein__putative	NYDKYNNNNNNIYNNKYCENSFLKKTNICNKCSNEKKCIHTLNNEKTNNKTKLRAKKLHYKI
PF3D7_0600700.1-p1:transcript=PF3D7_0600700.1:gene=PF3D7_0600700:organism=Plasmodium_falciparum_3D7:gene_product=rifin:transcript_product=rifin:location=Pf3D7_06_v3:31965-33244(-):protein_length=349:sequence_SO=chromosome:SO=protein_coding_seq3	PF3D7_0600700.1-p1	(51, 112)	rifin	DDDPQMKEVMVKFSKQTQQRFEEYDERMKTTRQKCKDKCDKEIQKIILKDRLEKQMEQQLTT
PF3D7_0600700.1-p1:transcript=PF3D7_0600700.1:gene=PF3D7_0600700:organism=Plasmodium_falciparum_3D7:gene_product=rifin:transcript_product=rifin:location=Pf3D7_06_v3:31965-33244(-):protein_length=349:sequence_SO=chromosome:SO=protein_coding_seq8	PF3D7_0600700.1-p1	(176, 237)	rifin	AKKAALAEATDAAIEAGMNAVSLKIEELGTVFKPSEGFVNLSSIVNKLTYNNGDALVESAKN
PF3D7_0404100.1-p1:transcript=PF3D7_0404100.1:gene=PF3D7_0404100:organism=Plasmodium_falciparum_3D7:gene_product=AP2_domain_transcription_factor_AP2-SP2__putative:transcript_product=AP2_domain_transcription_factor_AP2-SP2__putative:location=Pf3D7_04_v3:224779-231733(-):protein_length=2271:sequence_SO=chromosome:SO=protein_coding_seq44	PF3D7_0404100.1-p1	(1076, 1137)	PF3D7_0404100.1-p1AP2_domain_transcription_factor_AP2-SP2__putative	LINKNDDTHNNDINNIHNKCDMDHLYNHIIPYKNIKITEEYKSNKKNDTNHNKYTNKKKISK
PFIT_1478100.1-p1:transcript=PFIT_1478100.1:gene=PFIT_1478100:organism=Plasmodium_falciparum_IT:gene_product=Plasmodium_exported_protein_(hyp17)__unknown_function:transcript_product=Plasmodium_exported_protein_(hyp17)__unknown_function:location=PfIT_14_v3:3190030-3193348(+):protein_length=1075:sequence_SO=chromosome:SO=protein_coding_seq13	PFIT_1478100.1-p1	(301, 362)	PFIT_1478100.1-p1Plasmodium_exported_protein_(hyp17)__unknown_function	SKNYEVNNNDRETNDISSKMETQNEPTIKNSNDTNDVKKEDTNITQQGRVNSNSSNINGVKS
PF3D7_0216000.1-p1:transcript=PF3D7_0216000.1:gene=PF3D7_0216000:organism=Plasmodium_falciparum_3D7:gene_product=DEAD/DEAH_box_helicase__putative:transcript_product=DEAD/DEAH_box_helicase__putative:location=Pf3D7_02_v3:658636-664629(+):protein_length=1997:sequence_SO=chromosome:SO=protein_coding_seq34	PF3D7_0216000.1-p1	(826, 887)	PF3D7_0216000.1-p1DEAD/DEAH_box_helicase__putative	THGQQNGYNNKKGYDTMYEHNENNTKICNYKNARENYYNISHVVKEKVKQPSILIGGELMKY
PFIT_1222300.1-p1:transcript=PFIT_1222300.1:gene=PFIT_1222300:organism=Plasmodium_falciparum_IT:gene_product=transcription_factor_with_AP2_domain(s):transcript_product=transcription_factor_with_AP2_domain(s):location=PfIT_12_v3:859653-867020(+):protein_length=2455:sequence_SO=chromosome:SO=protein_coding_seq53	PFIT_1222300.1-p1	(1301, 1362)	PFIT_1222300.1-p1transcription_factor_with_AP2_domain(s)	PINSTQDYNTNYDKNGCLGTLTCDIKNKNNKNNKNNKNNKNNKNNKNNKNKNNNDNNNNNNN
PFIT_0522600.1-p1:transcript=PFIT_0522600.1:gene=PFIT_0522600:organism=Plasmodium_falciparum_IT:gene_product=conserved_Plasmodium_protein__unknown_function:transcript_product=conserved_Plasmodium_protein__unknown_function:location=PfIT_05_v3:914432-942895(+):protein_length=9310:sequence_SO=chromosome:SO=protein_coding_seq206	PFIT_0522600.1-p1	(5126, 5187)	PFIT_0522600.1-p1conserved_Plasmodium_protein__unknown_function	KRSMNDEVLDEECIKKMNLNKYSLKNTYKGKKRITLDMDKIEMESEDLNRSKMVSQIDSNNN
PF3D7_1101100.1-p1:transcript=PF3D7_1101100.1:gene=PF3D7_1101100:organism=Plasmodium_falciparum_3D7:gene_product=rifin:transcript_product=rifin:location=Pf3D7_11_v3:66686-67965(-):protein_length=349:sequence_SO=chromosome:SO=protein_coding_seq4	PF3D7_1101100.1-p1	(76, 137)	rifin	YDERMKTTRQKCKDKCDKEIQKIILKDKLEKELNEKFLTLQTDIQNDAIPTCVCEKSLADKV
PFD0625c_D6_seq16	PFD0625c_D6	(376, 437)	var	TNMDTNPDKSTMDTILDDLEKYNEPYYYDFYKHDIYYDVNDDKASEDHINMDHNKMDNNNSD
PFIT_0601500.1-p1:transcript=PFIT_0601500.1:gene=PFIT_0601500:organism=Plasmodium_falciparum_IT:gene_product=conserved_Plasmodium_protein__unknown_function:transcript_product=conserved_Plasmodium_protein__unknown_function:location=PfIT_06_v3:49547-54226(-):protein_length=1304:sequence_SO=chromosome:SO=protein_coding_seq17	PFIT_0601500.1-p1	(401, 462)	PFIT_0601500.1-p1conserved_Plasmodium_protein__unknown_function	NKKERKTFSDFPPEQFMQNKNDSKENMNEDSKKKISFTLNKSKNKIFQTYNRYLNNKNNKSI
PF3D7_1149100.1-p1:transcript=PF3D7_1149100.1:gene=PF3D7_1149100:organism=Plasmodium_falciparum_3D7:gene_product=Plasmodium_exported_protein__unknown_function:transcript_product=Plasmodium_exported_protein__unknown_function:location=Pf3D7_11_v3:1972400-1973874(+):protein_length=450:sequence_SO=chromosome:SO=protein_coding_seq7	PF3D7_1149100.1-p1	(151, 212)	PF3D7_1149100.1-p1Plasmodium_exported_protein__unknown_function	PLRNNDTKKENCESCKKEKTETQEESLNKEVVEGCSTGMCPLKNNDTKKENCESCKKEKTET
PF3D7_0912600.1-p1:transcript=PF3D7_0912600.1:gene=PF3D7_0912600:organism=Plasmodium_falciparum_3D7:gene_product=conserved_Plasmodium_protein__unknown_function:transcript_product=conserved_Plasmodium_protein__unknown_function:location=Pf3D7_09_v3:559144-561979(+):protein_length=906:sequence_SO=chromosome:SO=protein_coding_seq12	PF3D7_0912600.1-p1	(276, 337)	PF3D7_0912600.1-p1conserved_Plasmodium_protein__unknown_function	DNNEMIENMKKNNFNNKKYKNVLYNNAGEENNINPFIKNNPFTINRIEDVLKKNNKNNLNIS
PF3D7_0800200.1-p1:transcript=PF3D7_0800200.1:gene=PF3D7_0800200:organism=Plasmodium_falciparum_3D7:gene_product=erythrocyte_membrane_protein_1__PfEMP1:transcript_product=erythrocyte_membrane_protein_1__PfEMP1:location=Pf3D7_08_v3:29700-39033(-):protein_length=2858:sequence_SO=chromosome:SO=protein_coding_seq112	PF3D7_0800200.1-p1	(2776, 2837)	var	IEIDMDDPKGKKEFSNMDTILDDIEDDIYYDVNDDENPSVDNIPMDHNKVDVPKKVHVEMKI
PF3D7_0800200.1-p1:transcript=PF3D7_0800200.1:gene=PF3D7_0800200:organism=Plasmodium_falciparum_3D7:gene_product=erythrocyte_membrane_protein_1__PfEMP1:transcript_product=erythrocyte_membrane_protein_1__PfEMP1:location=Pf3D7_08_v3:29700-39033(-):protein_length=2858:sequence_SO=chromosome:SO=protein_coding_seq113	PF3D7_0800200.1-p1	(2801, 2862)	var	DDIEDDIYYDVNDDENPSVDNIPMDHNKVDVPKKVHVEMKILNNTSNGSLEPEFPISDVWNI
PF3D7_0800200.1-p1:transcript=PF3D7_0800200.1:gene=PF3D7_0800200:organism=Plasmodium_falciparum_3D7:gene_product=erythrocyte_membrane_protein_1__PfEMP1:transcript_product=erythrocyte_membrane_protein_1__PfEMP1:location=Pf3D7_08_v3:29700-39033(-):protein_length=2858:sequence_SO=chromosome:SO=protein_coding_seq111	PF3D7_0800200.1-p1	(2751, 2812)	var	NEQWNKDNDGGNVPIDNRSLNTDVWIEIDMDDPKGKKEFSNMDTILDDIEDDIYYDVNDDEN
PF3D7_1451200.1-p1:transcript=PF3D7_1451200.1:gene=PF3D7_1451200:organism=Plasmodium_falciparum_3D7:gene_product=conserved_Plasmodium_protein__unknown_function:transcript_product=conserved_Plasmodium_protein__unknown_function:location=Pf3D7_14_v3:2094340-2099736(-):protein_length=1504:sequence_SO=chromosome:SO=protein_coding_seq47	PF3D7_1451200.1-p1	(1151, 1212)	PF3D7_1451200.1-p1conserved_Plasmodium_protein__unknown_function	DKLNLTFECINEVHNEKEENADKNEPNNLSKLKFNNKEDEEFKINKENANMNLDNVLKNDNM
PFIT_0722300.1-p1:transcript=PFIT_0722300.1:gene=PFIT_0722300:organism=Plasmodium_falciparum_IT:gene_product=conserved_Plasmodium_protein__unknown_function:transcript_product=conserved_Plasmodium_protein__unknown_function:location=PfIT_07_v3:997583-1000756(-):protein_length=1011:sequence_SO=chromosome:SO=protein_coding_seq1	PFIT_0722300.1-p1	(1, 62)	PFIT_0722300.1-p1conserved_Plasmodium_protein__unknown_function	MEQNDVQSNVLKKKKKERNILNNDKDLNFENEKYIKKERRKNSENGFVNLREWTVKVQNRYE
PFIT_0316200.1-p1:transcript=PFIT_0316200.1:gene=PFIT_0316200:organism=Plasmodium_falciparum_IT:gene_product=conserved_Plasmodium_protein__unknown_function:transcript_product=conserved_Plasmodium_protein__unknown_function:location=PfIT_03_v3:593302-600635(-):protein_length=2402:sequence_SO=chromosome:SO=protein_coding_seq8	PFIT_0316200.1-p1	(176, 237)	PFIT_0316200.1-p1conserved_Plasmodium_protein__unknown_function	DDNNNNKNHYVDNNNNNNNHCGVYFKRKRKEKNVDNISYHNIVKDFFLDVCKYSKDYEKEKL
PF3D7_1431900.1-p1:transcript=PF3D7_1431900.1:gene=PF3D7_1431900:organism=Plasmodium_falciparum_3D7:gene_product=inner_membrane_complex_suture_component__putative:transcript_product=inner_membrane_complex_suture_component__putative:location=Pf3D7_14_v3:1253540-1256878(+):protein_length=732:sequence_SO=chromosome:SO=protein_coding_seq7	PF3D7_1431900.1-p1	(151, 212)	PF3D7_1431900.1-p1inner_membrane_complex_suture_component__putative	PEILSTYAKCLESCPSSNIVSKDIADLNKDKNKDKNKYFVESYFFSYKKKNNNNNNIVIDKR
PFIT_0316200.1-p1:transcript=PFIT_0316200.1:gene=PFIT_0316200:organism=Plasmodium_falciparum_IT:gene_product=conserved_Plasmodium_protein__unknown_function:transcript_product=conserved_Plasmodium_protein__unknown_function:location=PfIT_03_v3:593302-600635(-):protein_length=2402:sequence_SO=chromosome:SO=protein_coding_seq7	PFIT_0316200.1-p1	(151, 212)	PFIT_0316200.1-p1conserved_Plasmodium_protein__unknown_function	NNKNHCDDNNNKNHCDDNNNNKNHCDDNNNNKNHYVDNNNNNNNHCGVYFKRKRKEKNVDNI
PF3D7_0310200.1-p1:transcript=PF3D7_0310200.1:gene=PF3D7_0310200:organism=Plasmodium_falciparum_3D7:gene_product=phd_finger_protein__putative:transcript_product=phd_finger_protein__putative:location=Pf3D7_03_v3:427290-440942(+):protein_length=4550:sequence_SO=chromosome:SO=protein_coding_seq141	PF3D7_0310200.1-p1	(3501, 3562)	PF3D7_0310200.1-p1phd_finger_protein__putative	TTQPYESINCYAGLVRNTCSTDKINTNDVNVKRENVSKNDLQDVKDDNDKTRNGDIGINDEI
PF3D7_1302500.1-p1:transcript=PF3D7_1302500.1:gene=PF3D7_1302500:organism=Plasmodium_falciparum_3D7:gene_product=conserved_Plasmodium_protein__unknown_function:transcript_product=conserved_Plasmodium_protein__unknown_function:location=Pf3D7_13_v3:131849-140594(-):protein_length=2743:sequence_SO=chromosome:SO=protein_coding_seq39	PF3D7_1302500.1-p1	(951, 1012)	PF3D7_1302500.1-p1conserved_Plasmodium_protein__unknown_function	NIEHKCVKSTYKENKNNDINCKNKQTNDKNLKSNPSDNKGTNNSEIVKKLNKYDKFMKMCLL
PFIT_1025000.1-p1:transcript=PFIT_1025000.1:gene=PFIT_1025000:organism=Plasmodium_falciparum_IT:gene_product=conserved_Plasmodium_protein__unknown_function:transcript_product=conserved_Plasmodium_protein__unknown_function:location=PfIT_10_v3:1003073-1022326(-):protein_length=5728:sequence_SO=chromosome:SO=protein_coding_seq140	PFIT_1025000.1-p1	(3476, 3537)	PFIT_1025000.1-p1conserved_Plasmodium_protein__unknown_function	MFNVNKQKINKKKIKDDINNKIEDDINNKIEDDINNKIEGDNKNKIEDDINNKIEDDINNKI
PFD0005w_D7_seq6	PFD0005w_D7	(126, 187)	var	SGNNTTASGNNTTASGNNTTASGKNTPSDTQNDIQSDGIPSSKITDNEWNTLKDEFISQYIQ
PFD0005w_D7_seq7	PFD0005w_D7	(151, 212)	var	TPSDTQNDIQSDGIPSSKITDNEWNTLKDEFISQYIQSEQPKDVPNDYSSGDIPFNTQHNTL
PF3D7_1002400.1-p1:transcript=PF3D7_1002400.1:gene=PF3D7_1002400:organism=Plasmodium_falciparum_3D7:gene_product=RNA-binding_protein__putative:transcript_product=RNA-binding_protein__putative:location=Pf3D7_10_v3:121115-123291(+):protein_length=248:sequence_SO=chromosome:SO=protein_coding_seq6	PF3D7_1002400.1-p1	(126, 187)	PF3D7_1002400.1-p1RNA-binding_protein__putative	YGRKYDRPYDRRRYDSRRVNPYGRDRMRNFGYRNNGYRHDRYDRRPRNDYRNYDRRSIDNKY
PF3D7_1219300.1-p1:transcript=PF3D7_1219300.1:gene=PF3D7_1219300:organism=Plasmodium_falciparum_3D7:gene_product=erythrocyte_membrane_protein_1__PfEMP1:transcript_product=erythrocyte_membrane_protein_1__PfEMP1:location=Pf3D7_12_v3:766654-774197(-):protein_length=2256:sequence_SO=chromosome:SO=protein_coding_seq68	PF3D7_1219300.1-p1	(1676, 1737)	var	CKDPSSGENQKTPCQEYTPPDDDEDLLLEEENTVKAPTFCPKPPKKEEQTEETCDKAADEKV
PFIT_0933800.1-p1:transcript=PFIT_0933800.1:gene=PFIT_0933800:organism=Plasmodium_falciparum_IT:gene_product=conserved_Plasmodium_protein__unknown_function:transcript_product=conserved_Plasmodium_protein__unknown_function:location=PfIT_09_v3:1298612-1301578(+):protein_length=988:sequence_SO=chromosome:SO=protein_coding_seq21	PFIT_0933800.1-p1	(501, 562)	PFIT_0933800.1-p1conserved_Plasmodium_protein__unknown_function	LSREEVSLNNNNNNYVERDKIYMNEPKENKVSNQNNNLNKNIKSNIRIERIHINTNNKDSSS
PFIT_1430600.1-p1:transcript=PFIT_1430600.1:gene=PFIT_1430600:organism=Plasmodium_falciparum_IT:gene_product=rRNA_(adenosine-2'-O-)-methyltransferase__putative:transcript_product=rRNA_(adenosine-2'-O-)-methyltransferase__putative:location=PfIT_14_v3:1181347-1189626(+):protein_length=2759:sequence_SO=chromosome:SO=protein_coding_seq100	PFIT_1430600.1-p1	(2476, 2537)	PFIT_1430600.1-p1rRNA_(adenosine-2'-O-)-methyltransferase__putative	DVHKKSDDVHKKGDDVHKKSDDVHKKSDDVHKKGDDIDKKSDDIDKKSDDIDKKSDDIDKKS
PFIT_0504000.1-p1:transcript=PFIT_0504000.1:gene=PFIT_0504000:organism=Plasmodium_falciparum_IT:gene_product=cation_transporting_P-ATPase:transcript_product=cation_transporting_P-ATPase:location=PfIT_05_v3:167196-174487(+):protein_length=2373:sequence_SO=chromosome:SO=protein_coding_seq70	PFIT_0504000.1-p1	(1726, 1787)	cation_transporting_P-ATPase	SNTKNINSSIHSNMSNMELNHDEMKHSPKSPASKFLSFENFFKSGKKKNIKNNNKTDNENNY
PFD1000c_D6_seq4	PFD1000c_D6	(76, 137)	var	SGYTDHYSDITSSESEYEEMDINDIYVPGSPKYKTLIEVVLEPSKSNGNTLGDDMVPTTNTF
PFD1000c_D6_seq9	PFD1000c_D6	(201, 262)	var	SYNINMSTNSMDDIPINRDNNVYSGIDLINDTLSGNQHIDIYDEVLKRKENELFGTKHHTKR
PF3D7_1003700.1-p1:transcript=PF3D7_1003700.1:gene=PF3D7_1003700:organism=Plasmodium_falciparum_3D7:gene_product=MKT1_domain-containing_protein__putative:transcript_product=MKT1_domain-containing_protein__putative:location=Pf3D7_10_v3:166743-170669(-):protein_length=1308:sequence_SO=chromosome:SO=protein_coding_seq43	PF3D7_1003700.1-p1	(1051, 1112)	PF3D7_1003700.1-p1MKT1_domain-containing_protein__putative	MNNDIETMNDHLLKDKLENQKETEHLSKNNDFKGYDMTTNNHISITQPNKKNNDHINMKEIN
PF3D7_1003700.1-p1:transcript=PF3D7_1003700.1:gene=PF3D7_1003700:organism=Plasmodium_falciparum_3D7:gene_product=MKT1_domain-containing_protein__putative:transcript_product=MKT1_domain-containing_protein__putative:location=Pf3D7_10_v3:166743-170669(-):protein_length=1308:sequence_SO=chromosome:SO=protein_coding_seq44	PF3D7_1003700.1-p1	(1076, 1137)	PF3D7_1003700.1-p1MKT1_domain-containing_protein__putative	LSKNNDFKGYDMTTNNHISITQPNKKNNDHINMKEINDKFYTNEQPEDKHMKVDKNQKYGIN
PF3D7_1003700.1-p1:transcript=PF3D7_1003700.1:gene=PF3D7_1003700:organism=Plasmodium_falciparum_3D7:gene_product=MKT1_domain-containing_protein__putative:transcript_product=MKT1_domain-containing_protein__putative:location=Pf3D7_10_v3:166743-170669(-):protein_length=1308:sequence_SO=chromosome:SO=protein_coding_seq45	PF3D7_1003700.1-p1	(1101, 1162)	PF3D7_1003700.1-p1MKT1_domain-containing_protein__putative	KNNDHINMKEINDKFYTNEQPEDKHMKVDKNQKYGINQVEHKDKRSLIELENNDKNIIYKEN
PF3D7_1110900.1-p1:transcript=PF3D7_1110900.1:gene=PF3D7_1110900:organism=Plasmodium_falciparum_3D7:gene_product=ES2_protein__putative:transcript_product=ES2_protein__putative:location=Pf3D7_11_v3:431906-433645(-):protein_length=579:sequence_SO=chromosome:SO=protein_coding_seq7	PF3D7_1110900.1-p1	(151, 212)	PF3D7_1110900.1-p1ES2_protein__putative	NKFNSDVESYHFSNNMDNTSDHFKYIKKKKKKKDPYGNNYNDEYVDSQSESSSGYNKKENIK
PF08_0107_D2_seq15	PF08_0107_D2	(351, 412)	var	GGKSRKKRAARSSSSSSYDNGYEKKFYDQLKAGGYNGVNSFLDLLSKEKTCKDITDTEGGKI
PF3D7_1239200.1-p1:transcript=PF3D7_1239200.1:gene=PF3D7_1239200:organism=Plasmodium_falciparum_3D7:gene_product=AP2_domain_transcription_factor__putative:transcript_product=AP2_domain_transcription_factor__putative:location=Pf3D7_12_v3:1634695-1642428(+):protein_length=2577:sequence_SO=chromosome:SO=protein_coding_seq68	PF3D7_1239200.1-p1	(1676, 1737)	PF3D7_1239200.1-p1AP2_domain_transcription_factor__putative	NINVIPLVNKNYSDISSSYDIKKKNLHKNKKKHKNHINDNNIINVDYNMKGADNINNINSNM
PF3D7_1201000.1-p1:transcript=PF3D7_1201000.1:gene=PF3D7_1201000:organism=Plasmodium_falciparum_3D7:gene_product=Plasmodium_exported_protein_(PHISTb)__unknown_function:transcript_product=Plasmodium_exported_protein_(PHISTb)__unknown_function:location=Pf3D7_12_v3:76846-79067(-):protein_length=653:sequence_SO=chromosome:SO=protein_coding_seq16	PF3D7_1201000.1-p1	(376, 437)	PF3D7_1201000.1-p1Plasmodium_exported_protein_(PHISTb)__unknown_function	EKDEKEKDEKEKKVSNIKNNLRAVPQNSGSNFDEFLDVKEANEIVQDVLQEFVEGKISEEED
PF3D7_1442600.1-p1:transcript=PF3D7_1442600.1:gene=PF3D7_1442600:organism=Plasmodium_falciparum_3D7:gene_product=TRAP-like_protein:transcript_product=TRAP-like_protein:location=Pf3D7_14_v3:1730087-1740916(+):protein_length=3543:sequence_SO=chromosome:SO=protein_coding_seq112	PF3D7_1442600.1-p1	(2776, 2837)	TRAP-like_protein	EGKNKEFEEGNNKDVKEENEKEINEGNEEEINEGNEKEIKEGNEKEIKEGNDKKFEEGNDKE
PFIT_1227000.1-p1:transcript=PFIT_1227000.1:gene=PFIT_1227000:organism=Plasmodium_falciparum_IT:gene_product=conserved_Plasmodium_protein__unknown_function:transcript_product=conserved_Plasmodium_protein__unknown_function:location=PfIT_12_v3:1057613-1061104(+):protein_length=1163:sequence_SO=chromosome:SO=protein_coding_seq37	PFIT_1227000.1-p1	(901, 962)	PFIT_1227000.1-p1conserved_Plasmodium_protein__unknown_function	NNFKENHQTGDNNNDNNNNKNNKNDNNNNNNNKDIKNKEENNIYYNNHNLDNLNYIPFDNFF
PF3D7_1442600.1-p1:transcript=PF3D7_1442600.1:gene=PF3D7_1442600:organism=Plasmodium_falciparum_3D7:gene_product=TRAP-like_protein:transcript_product=TRAP-like_protein:location=Pf3D7_14_v3:1730087-1740916(+):protein_length=3543:sequence_SO=chromosome:SO=protein_coding_seq110	PF3D7_1442600.1-p1	(2726, 2787)	TRAP-like_protein	IRERNDKEINEGNDKNFEKEIEKQSEEANEKEIKEGNDKIFEEGNYKEINEGKNKEFEEGNN
PF3D7_1442600.1-p1:transcript=PF3D7_1442600.1:gene=PF3D7_1442600:organism=Plasmodium_falciparum_3D7:gene_product=TRAP-like_protein:transcript_product=TRAP-like_protein:location=Pf3D7_14_v3:1730087-1740916(+):protein_length=3543:sequence_SO=chromosome:SO=protein_coding_seq111	PF3D7_1442600.1-p1	(2751, 2812)	TRAP-like_protein	EEANEKEIKEGNDKIFEEGNYKEINEGKNKEFEEGNNKDVKEENEKEINEGNEEEINEGNEK
PFCLINvar33_seq31	PFCLINvar33	(751, 812)	var	PCVDKSGATPTKTLTVVATDIQEEVHKKMVKNSGTDSSGESKLKGDISRGKFYEGRKVNYLE
PFIT_0405500.1-p1:transcript=PFIT_0405500.1:gene=PFIT_0405500:organism=Plasmodium_falciparum_IT:gene_product=conserved_Plasmodium_protein__unknown_function:transcript_product=conserved_Plasmodium_protein__unknown_function:location=PfIT_04_v3:381982-388187(-):protein_length=1757:sequence_SO=chromosome:SO=protein_coding_seq46	PFIT_0405500.1-p1	(1126, 1187)	PFIT_0405500.1-p1conserved_Plasmodium_protein__unknown_function	VDDKKNNIMNVDEKRKSDHPSYERVLKMEGSNKNEEGYSNTDKILKNEKNEKNVNEKKGEND
PFCLINvar40_seq40	PFCLINvar40	(976, 1037)	var	DTETKKMDKELHDNLTTNPKYTYSKVTFTEPNGTPLPTFAQTPQFLRWFTEWGDQFCREQKK
PFCLINvar40_seq41	PFCLINvar40	(1001, 1062)	var	VTFTEPNGTPLPTFAQTPQFLRWFTEWGDQFCREQKKELDILVKGCEKCDVSDIDGTCDKNG
PF3D7_0919900.1-p1:transcript=PF3D7_0919900.1:gene=PF3D7_0919900:organism=Plasmodium_falciparum_3D7:gene_product=regulator_of_chromosome_condensation__putative:transcript_product=regulator_of_chromosome_condensation__putative:location=Pf3D7_09_v3:809659-819804(-):protein_length=3381:sequence_SO=chromosome:SO=protein_coding_seq63	PF3D7_0919900.1-p1	(1551, 1612)	PF3D7_0919900.1-p1regulator_of_chromosome_condensation__putative	EAHILRVRNYKVGYLNKGNHISRKQQNNNIIKKKRSISSFSLNQQDNSNDNSDVNSFNIIKN
PFIT_0103100.1-p1:transcript=PFIT_0103100.1:gene=PFIT_0103100:organism=Plasmodium_falciparum_IT:gene_product=conserved_Plasmodium_protein__unknown_function:transcript_product=conserved_Plasmodium_protein__unknown_function:location=PfIT_01_v3:148107-152141(+):protein_length=1344:sequence_SO=chromosome:SO=protein_coding_seq2	PFIT_0103100.1-p1	(26, 87)	PFIT_0103100.1-p1conserved_Plasmodium_protein__unknown_function	NLKNFSFLFYHHIKNKKKETPIYPKNINNKLLYVTYEENIRIKEKKQKKDYKDEKDEKDDKD
PFIT_0103100.1-p1:transcript=PFIT_0103100.1:gene=PFIT_0103100:organism=Plasmodium_falciparum_IT:gene_product=conserved_Plasmodium_protein__unknown_function:transcript_product=conserved_Plasmodium_protein__unknown_function:location=PfIT_01_v3:148107-152141(+):protein_length=1344:sequence_SO=chromosome:SO=protein_coding_seq3	PFIT_0103100.1-p1	(51, 112)	PFIT_0103100.1-p1conserved_Plasmodium_protein__unknown_function	NINNKLLYVTYEENIRIKEKKQKKDYKDEKDEKDDKDEKDEKDDKDEKDDENHKYITKKKCH
PF3D7_0702300.1-p1:transcript=PF3D7_0702300.1:gene=PF3D7_0702300:organism=Plasmodium_falciparum_3D7:gene_product=sporozoite_threonine_and_asparagine-rich_protein:transcript_product=sporozoite_threonine_and_asparagine-rich_protein:location=Pf3D7_07_v3:96761-98730(+):protein_length=594:sequence_SO=chromosome:SO=protein_coding_seq15	PF3D7_0702300.1-p1	(351, 412)	sporozoite_threonine_and_asparagine-rich_protein	DNADTILTDNDNNTDIILTDNNNTDTISTDNDNADTKATDNNNNTNTKATDNNNTKIISPDN
PF3D7_0702300.1-p1:transcript=PF3D7_0702300.1:gene=PF3D7_0702300:organism=Plasmodium_falciparum_3D7:gene_product=sporozoite_threonine_and_asparagine-rich_protein:transcript_product=sporozoite_threonine_and_asparagine-rich_protein:location=Pf3D7_07_v3:96761-98730(+):protein_length=594:sequence_SO=chromosome:SO=protein_coding_seq17	PF3D7_0702300.1-p1	(401, 462)	sporozoite_threonine_and_asparagine-rich_protein	DNNNTKIISPDNNNTKTTSTDNNNNTNTKATDNNNTKTISNDNNNTKTISTDNNNTKTISND
PF3D7_0702300.1-p1:transcript=PF3D7_0702300.1:gene=PF3D7_0702300:organism=Plasmodium_falciparum_3D7:gene_product=sporozoite_threonine_and_asparagine-rich_protein:transcript_product=sporozoite_threonine_and_asparagine-rich_protein:location=Pf3D7_07_v3:96761-98730(+):protein_length=594:sequence_SO=chromosome:SO=protein_coding_seq16	PF3D7_0702300.1-p1	(376, 437)	sporozoite_threonine_and_asparagine-rich_protein	TISTDNDNADTKATDNNNNTNTKATDNNNTKIISPDNNNTKTTSTDNNNNTNTKATDNNNTK
PF3D7_0702300.1-p1:transcript=PF3D7_0702300.1:gene=PF3D7_0702300:organism=Plasmodium_falciparum_3D7:gene_product=sporozoite_threonine_and_asparagine-rich_protein:transcript_product=sporozoite_threonine_and_asparagine-rich_protein:location=Pf3D7_07_v3:96761-98730(+):protein_length=594:sequence_SO=chromosome:SO=protein_coding_seq11	PF3D7_0702300.1-p1	(251, 312)	sporozoite_threonine_and_asparagine-rich_protein	NINTTQNLTTSTNTTTVSTDNNNINTKPIDNNNTDIKSTDNYNTGTKETDNKNTDIKATDNN
PF3D7_0702300.1-p1:transcript=PF3D7_0702300.1:gene=PF3D7_0702300:organism=Plasmodium_falciparum_3D7:gene_product=sporozoite_threonine_and_asparagine-rich_protein:transcript_product=sporozoite_threonine_and_asparagine-rich_protein:location=Pf3D7_07_v3:96761-98730(+):protein_length=594:sequence_SO=chromosome:SO=protein_coding_seq10	PF3D7_0702300.1-p1	(226, 287)	sporozoite_threonine_and_asparagine-rich_protein	TNSTDNSNTNTNLTDNTSTTKKLTDNINTTQNLTTSTNTTTVSTDNNNINTKPIDNNNTDIK
PF3D7_0702300.1-p1:transcript=PF3D7_0702300.1:gene=PF3D7_0702300:organism=Plasmodium_falciparum_3D7:gene_product=sporozoite_threonine_and_asparagine-rich_protein:transcript_product=sporozoite_threonine_and_asparagine-rich_protein:location=Pf3D7_07_v3:96761-98730(+):protein_length=594:sequence_SO=chromosome:SO=protein_coding_seq13	PF3D7_0702300.1-p1	(301, 362)	sporozoite_threonine_and_asparagine-rich_protein	NKNTDIKATDNNNITTTTDNTNTNVISTDNSKTNVISTDNSKTNTISTDNDNADTILTDNDN
PF3D7_0702300.1-p1:transcript=PF3D7_0702300.1:gene=PF3D7_0702300:organism=Plasmodium_falciparum_3D7:gene_product=sporozoite_threonine_and_asparagine-rich_protein:transcript_product=sporozoite_threonine_and_asparagine-rich_protein:location=Pf3D7_07_v3:96761-98730(+):protein_length=594:sequence_SO=chromosome:SO=protein_coding_seq19	PF3D7_0702300.1-p1	(451, 512)	sporozoite_threonine_and_asparagine-rich_protein	TDNNNTKTISNDNNNTNTISTDNNNNNTNQYVFANNYNETTSDDELNKDSCDYSEEKENIKS
PFIT_0511600.1-p1:transcript=PFIT_0511600.1:gene=PFIT_0511600:organism=Plasmodium_falciparum_IT:gene_product=RNA_pseudouridylate_synthase__putative:transcript_product=RNA_pseudouridylate_synthase__putative:location=PfIT_05_v3:494706-524771(+):protein_length=10021:sequence_SO=chromosome:SO=protein_coding_seq315	PFIT_0511600.1-p1	(7851, 7912)	PFIT_0511600.1-p1RNA_pseudouridylate_synthase__putative	TTITTSVEIPNDEHIKKILLKKPTNKILRKLNYDDFFTNKKKKDMNKENMKKTDEQKIKEEI
PFIT_0511600.1-p1:transcript=PFIT_0511600.1:gene=PFIT_0511600:organism=Plasmodium_falciparum_IT:gene_product=RNA_pseudouridylate_synthase__putative:transcript_product=RNA_pseudouridylate_synthase__putative:location=PfIT_05_v3:494706-524771(+):protein_length=10021:sequence_SO=chromosome:SO=protein_coding_seq316	PFIT_0511600.1-p1	(7876, 7937)	PFIT_0511600.1-p1RNA_pseudouridylate_synthase__putative	KILRKLNYDDFFTNKKKKDMNKENMKKTDEQKIKEEIKQTQDEEDTYLDLIDNEIKKRLRTN
PF3D7_1430400.1-p1:transcript=PF3D7_1430400.1:gene=PF3D7_1430400:organism=Plasmodium_falciparum_3D7:gene_product=autophagy_protein_5__putative:transcript_product=autophagy_protein_5__putative:location=Pf3D7_14_v3:1201748-1204339(+):protein_length=863:sequence_SO=chromosome:SO=protein_coding_seq9	PF3D7_1430400.1-p1	(201, 262)	PF3D7_1430400.1-p1autophagy_protein_5__putative	RNISTNTNNSSNVNHQQNCDRTDDDTLHKGDDILHKGDDILHKGDDILHKGDDILHKGDDIL
PF3D7_0104300.1-p1:transcript=PF3D7_0104300.1:gene=PF3D7_0104300:organism=Plasmodium_falciparum_3D7:gene_product=ubiquitin_carboxyl-terminal_hydrolase_1__putative:transcript_product=ubiquitin_carboxyl-terminal_hydrolase_1__putative:location=Pf3D7_01_v3:190269-201230(+):protein_length=3499:sequence_SO=chromosome:SO=protein_coding_seq102	PF3D7_0104300.1-p1	(2526, 2587)	PF3D7_0104300.1-p1ubiquitin_carboxyl-terminal_hydrolase_1__putative	NERTYAENLHNMNNIHNNKFCPSSYRHTQNILNMNSTHNNSSVNNNFNKMNHSISEKMGKNK
RAJ116var14_seq52	RAJ116var14	(1276, 1337)	var	LNGNSSAGDNNCCEEIKKHTSASDFLKDLKHCKDAQNNSGEKGNELDFTNTKTTFGPLDYCK
PF3D7_0413100.1-p1:transcript=PF3D7_0413100.1:gene=PF3D7_0413100:organism=Plasmodium_falciparum_3D7:gene_product=erythrocyte_membrane_protein_1__PfEMP1:transcript_product=erythrocyte_membrane_protein_1__PfEMP1:location=Pf3D7_04_v3:591949-599849(-):protein_length=2326:sequence_SO=chromosome:SO=protein_coding_seq17	PF3D7_0413100.1-p1	(401, 462)	var	QKEQFDKQKKKYTDEINEASRSSRRQKRGARSTGSSSNYDGYESKFYNILKDDYGTVDDFLK
PF3D7_0926800.1-p1:transcript=PF3D7_0926800.1:gene=PF3D7_0926800:organism=Plasmodium_falciparum_3D7:gene_product=conserved_Plasmodium_protein__unknown_function:transcript_product=conserved_Plasmodium_protein__unknown_function:location=Pf3D7_09_v3:1092844-1096521(-):protein_length=1225:sequence_SO=chromosome:SO=protein_coding_seq42	PF3D7_0926800.1-p1	(1026, 1087)	PF3D7_0926800.1-p1conserved_Plasmodium_protein__unknown_function	ANTNANISMNIENVSKTNKETYIKKNIHMIHKSNNNVSNATPNITNPTNSKMNNIVKKKKKN
PF3D7_0926800.1-p1:transcript=PF3D7_0926800.1:gene=PF3D7_0926800:organism=Plasmodium_falciparum_3D7:gene_product=conserved_Plasmodium_protein__unknown_function:transcript_product=conserved_Plasmodium_protein__unknown_function:location=Pf3D7_09_v3:1092844-1096521(-):protein_length=1225:sequence_SO=chromosome:SO=protein_coding_seq44	PF3D7_0926800.1-p1	(1076, 1137)	PF3D7_0926800.1-p1conserved_Plasmodium_protein__unknown_function	KMNNIVKKKKKNTQQINTLQTKKTNKNTVLKIKGGEEKQKKIIQTKNITSKVLNKNIANKGE
PF3D7_0926800.1-p1:transcript=PF3D7_0926800.1:gene=PF3D7_0926800:organism=Plasmodium_falciparum_3D7:gene_product=conserved_Plasmodium_protein__unknown_function:transcript_product=conserved_Plasmodium_protein__unknown_function:location=Pf3D7_09_v3:1092844-1096521(-):protein_length=1225:sequence_SO=chromosome:SO=protein_coding_seq45	PF3D7_0926800.1-p1	(1101, 1162)	PF3D7_0926800.1-p1conserved_Plasmodium_protein__unknown_function	KNTVLKIKGGEEKQKKIIQTKNITSKVLNKNIANKGETVLVPSKKKEKLMNNSEKKDKEENC
PFCLINvar54_seq82	PFCLINvar54	(2026, 2087)	var	ELLKRKENELFGTNHVKQTSIHSVAKLTNSDPIHNQLELFHKWLDRHRDMCEKWNNKEEVLD
PFCLINvar54_seq80	PFCLINvar54	(1976, 2037)	var	NNNLYSGENNVYGGIDPTGDNRGLTSGKHDSYSGIDLINDSLSGDYDIYDELLKRKENELFG
PF3D7_0406500.1-p1:transcript=PF3D7_0406500.1:gene=PF3D7_0406500:organism=Plasmodium_falciparum_3D7:gene_product=NYN_domain-containing_protein__putative:transcript_product=NYN_domain-containing_protein__putative:location=Pf3D7_04_v3:334282-344054(-):protein_length=3211:sequence_SO=chromosome:SO=protein_coding_seq4	PF3D7_0406500.1-p1	(76, 137)	PF3D7_0406500.1-p1NYN_domain-containing_protein__putative	KDDTIERINQKVVKTKKNHLINEEEKNIHEDINQNGNKSKPDDNKSKPDDNKSKPDDNKSKP
PF3D7_0406500.1-p1:transcript=PF3D7_0406500.1:gene=PF3D7_0406500:organism=Plasmodium_falciparum_3D7:gene_product=NYN_domain-containing_protein__putative:transcript_product=NYN_domain-containing_protein__putative:location=Pf3D7_04_v3:334282-344054(-):protein_length=3211:sequence_SO=chromosome:SO=protein_coding_seq3	PF3D7_0406500.1-p1	(51, 112)	PF3D7_0406500.1-p1NYN_domain-containing_protein__putative	SNLINIINNKNDIMKTTDVKNDKTLKDDTIERINQKVVKTKKNHLINEEEKNIHEDINQNGN
PF3D7_0800100.1-p1:transcript=PF3D7_0800100.1:gene=PF3D7_0800100:organism=Plasmodium_falciparum_3D7:gene_product=erythrocyte_membrane_protein_1__PfEMP1:transcript_product=erythrocyte_membrane_protein_1__PfEMP1:location=Pf3D7_08_v3:21361-28653(+):protein_length=2120:sequence_SO=chromosome:SO=protein_coding_seq16	PF3D7_0800100.1-p1	(376, 437)	var	TCIPFGPWIDNQKKEFLKQRNKYQNEISSNSRKKRSTSNNNYKGYDEEFYKILKEDYGDVEQ
PF3D7_0800100.1-p1:transcript=PF3D7_0800100.1:gene=PF3D7_0800100:organism=Plasmodium_falciparum_3D7:gene_product=erythrocyte_membrane_protein_1__PfEMP1:transcript_product=erythrocyte_membrane_protein_1__PfEMP1:location=Pf3D7_08_v3:21361-28653(+):protein_length=2120:sequence_SO=chromosome:SO=protein_coding_seq17	PF3D7_0800100.1-p1	(401, 462)	var	EISSNSRKKRSTSNNNYKGYDEEFYKILKEDYGDVEQFLEKLSREGICQSQPTVGNQKADAA
PFIT_0616600.1-p1:transcript=PFIT_0616600.1:gene=PFIT_0616600:organism=Plasmodium_falciparum_IT:gene_product=rifin:transcript_product=rifin:location=PfIT_06_v3:676124-677412(-):protein_length=380:sequence_SO=chromosome:SO=protein_coding_seq4	PFIT_0616600.1-p1	(76, 137)	rifin	FNKQTEQRFEEYNERMNKNRQKCKEQCDKEIQKIILKDKIEKELSGTLSALQTDIQSDAIPT
PF3D7_1303800.1-p1:transcript=PF3D7_1303800.1:gene=PF3D7_1303800:organism=Plasmodium_falciparum_3D7:gene_product=conserved_Plasmodium_protein__unknown_function:transcript_product=conserved_Plasmodium_protein__unknown_function:location=Pf3D7_13_v3:184845-212660(-):protein_length=9271:sequence_SO=chromosome:SO=protein_coding_seq75	PF3D7_1303800.1-p1	(1851, 1912)	PF3D7_1303800.1-p1conserved_Plasmodium_protein__unknown_function	DETCCLNRCTNKRIINDKKLSFLKLNKYNVTHFLSDDEYIRKRNNHSDECYYNKNKYMYHPL
[truncated: 8,847 more rows]
