# Supplementary material for: Proteome-wide antigenic profiling in Ugandan cohorts identifies associations between age, exposure intensity, and responses to repeat-containing antigens in Plasmodium falciparum
Source: bioRxiv preprint, doi:10.1101/2022.06.24.497532, version 1 (2022-06-26)
Supplement: Supplemental Table 5 [file 497532_file07.xlsx]

## Sheet: All motifs
NOTE: Due to character limit in cells in Excel, overflow of text from the second column goes into the subsequent row for three motifs - PEEVVEE, EEVVEEV, QKIILKD
Interprotein motif	Proteins sharing the motif
NEKNEKN	{'PF3D7_0313400.1-p1:transcript=PF3D7_0313400.1:gene=PF3D7_0313400:organism=Plasmodium_falciparum_3D7:gene_product=conserved_Plasmodium_protein__unknown_function:transcript_product=conserved_Plasmodium_protein__unknown_function:location=Pf3D7_03_v3:545828-548182(-):protein_length=784:sequence_SO=chromosome:SO=protein_coding_seq7', 'PF3D7_0721000.1-p1:transcript=PF3D7_0721000.1:gene=PF3D7_0721000:…
RIEKEKQ	{'PF3D7_1335300.1-p1:transcript=PF3D7_1335300.1:gene=PF3D7_1335300:organism=Plasmodium_falciparum_3D7:gene_product=reticulocyte_binding_protein_2_homologue_b:transcript_product=reticulocyte_binding_protein_2_homologue_b:location=Pf3D7_13_v3:1428874-1438852(-):protein_length=3254:sequence_SO=chromosome:SO=protein_coding_seq108', 'PF3D7_1335400.1-p1:transcript=PF3D7_1335400.1:gene=PF3D7_1335400:org…
AWAADPE|AYAADPE	{'PF3D7_1401000.1-p1:transcript=PF3D7_1401000.1:gene=PF3D7_1401000:organism=Plasmodium_falciparum_3D7:gene_product=glycophorin_binding_protein:transcript_product=glycophorin_binding_protein:location=Pf3D7_14_v3:34693-35773(-):protein_length=307:sequence_SO=chromosome:SO=protein_coding_seq11', 'PF3D7_1401000.1-p1:transcript=PF3D7_1401000.1:gene=PF3D7_1401000:organism=Plasmodium_falciparum_3D7:gene…
EQERLQK	{'PF3D7_1335400.1-p1:transcript=PF3D7_1335400.1:gene=PF3D7_1335400:organism=Plasmodium_falciparum_3D7:gene_product=reticulocyte_binding_protein_2_homologue_a:transcript_product=reticulocyte_binding_protein_2_homologue_a:location=Pf3D7_13_v3:1440779-1450385(+):protein_length=3130:sequence_SO=chromosome:SO=protein_coding_seq110', 'PF3D7_1335400.1-p1:transcript=PF3D7_1335400.1:gene=PF3D7_1335400:org…
NIMSGDN|NIMSGEN	{'PFIT_1342100.1-p1:transcript=PFIT_1342100.1:gene=PFIT_1342100:organism=Plasmodium_falciparum_IT:gene_product=transcription_factor_with_AP2_domain(s):transcript_product=transcription_factor_with_AP2_domain(s):location=PfIT_13_v3:1634784-1646174(-):protein_length=3796:sequence_SO=chromosome:SO=protein_coding_seq29', 'PF3D7_1342900.1-p1:transcript=PF3D7_1342900.1:gene=PF3D7_1342900:organism=Plasmo…
KEDVKED	{'PF3D7_0715200.1-p1:transcript=PF3D7_0715200.1:gene=PF3D7_0715200:organism=Plasmodium_falciparum_3D7:gene_product=conserved_Plasmodium_protein__unknown_function:transcript_product=conserved_Plasmodium_protein__unknown_function:location=Pf3D7_07_v3:676061-682681(-):protein_length=2206:sequence_SO=chromosome:SO=protein_coding_seq20', 'PFIT_0713300.1-p1:transcript=PFIT_0713300.1:gene=PFIT_0713300:o…
DERNQNV	{'PF3D7_0801000.1-p1:transcript=PF3D7_0801000.1:gene=PF3D7_0801000:organism=Plasmodium_falciparum_3D7:gene_product=Plasmodium_exported_protein_(PHISTc)__unknown_function:transcript_product=Plasmodium_exported_protein_(PHISTc)__unknown_function:location=Pf3D7_08_v3:84568-88422(-):protein_length=1219:sequence_SO=chromosome:SO=protein_coding_seq29', 'PF3D7_0801000.1-p1:transcript=PF3D7_0801000.1:gen…
EIIKNDE	{'PF3D7_1125700.1-p1:transcript=PF3D7_1125700.1:gene=PF3D7_1125700:organism=Plasmodium_falciparum_3D7:gene_product=kelch_domain-containing_protein__putative:transcript_product=kelch_domain-containing_protein__putative:location=Pf3D7_11_v3:1004780-1007354(-):protein_length=669:sequence_SO=chromosome:SO=protein_coding_seq24', 'PF3D7_1125700.1-p1:transcript=PF3D7_1125700.1:gene=PF3D7_1125700:organis…
YINGNMQ	{'PF3D7_0322700.1-p1:transcript=PF3D7_0322700.1:gene=PF3D7_0322700:organism=Plasmodium_falciparum_3D7:gene_product=conserved_Plasmodium_protein__unknown_function:transcript_product=conserved_Plasmodium_protein__unknown_function:location=Pf3D7_03_v3:952964-962367(-):protein_length=3096:sequence_SO=chromosome:SO=protein_coding_seq106', 'PF3D7_0322700.1-p1:transcript=PF3D7_0322700.1:gene=PF3D7_03227…
GSINSSL|GTINSSL	{'PF3D7_1208500.1-p1:transcript=PF3D7_1208500.1:gene=PF3D7_1208500:organism=Plasmodium_falciparum_3D7:gene_product=conserved_Plasmodium_protein__unknown_function:transcript_product=conserved_Plasmodium_protein__unknown_function:location=Pf3D7_12_v3:395986-401247(-):protein_length=1753:sequence_SO=chromosome:SO=protein_coding_seq10', 'PF3D7_1123500.1-p1:transcript=PF3D7_1123500.1:gene=PF3D7_112350…
DLKNTPN|DLKQTPN	{'PF3D7_0420000.1-p1:transcript=PF3D7_0420000.1:gene=PF3D7_0420000:organism=Plasmodium_falciparum_3D7:gene_product=zinc_finger_protein__putative:transcript_product=zinc_finger_protein__putative:location=Pf3D7_04_v3:894612-904724(-):protein_length=3370:sequence_SO=chromosome:SO=protein_coding_seq15', 'PF3D7_0201900.1-p1:transcript=PF3D7_0201900.1:gene=PF3D7_0201900:organism=Plasmodium_falciparum_3…
INNNIKN|LNNNIKN	{'PFIT_1021400.1-p1:transcript=PFIT_1021400.1:gene=PFIT_1021400:organism=Plasmodium_falciparum_IT:gene_product=conserved_Plasmodium_protein_(10b_antigen)__unknown_function:transcript_product=conserved_Plasmodium_protein_(10b_antigen)__unknown_function:location=PfIT_10_v3:840446-847246(-):protein_length=2266:sequence_SO=chromosome:SO=protein_coding_seq11', 'PF3D7_1021900.1-p1:transcript=PF3D7_1021…
IQSDGIP	{'PFI0005w_D6_seq5', 'PFL0020w_D8_seq6', 'PFD0005w_D7_seq6', 'PFIT_0400100.1-p1:transcript=PFIT_0400100.1:gene=PFIT_0400100:organism=Plasmodium_falciparum_IT:gene_product=rifin:transcript_product=rifin:location=PfIT_04_v3:117611-118957(+):protein_length=370:sequence_SO=chromosome:SO=protein_coding_seq4', 'PFD0005w_D7_seq7', 'PF3D7_0900100.1-p1:transcript=PF3D7_0900100.1:gene=PF3D7_0900100:organis…
DNKNGDD	{'PF3D7_0722200.1-p1:transcript=PF3D7_0722200.1:gene=PF3D7_0722200:organism=Plasmodium_falciparum_3D7:gene_product=rhoptry-associated_leucine_zipper-like_protein_1:transcript_product=rhoptry-associated_leucine_zipper-like_protein_1:location=Pf3D7_07_v3:946363-948612(+):protein_length=749:sequence_SO=chromosome:SO=protein_coding_seq18', 'PF3D7_0507800.1-p1:transcript=PF3D7_0507800.1:gene=PF3D7_050…
EELIEKV	{'PF3D7_1035900.1-p1:transcript=PF3D7_1035900.1:gene=PF3D7_1035900:organism=Plasmodium_falciparum_3D7:gene_product=probable_protein__unknown_function:transcript_product=probable_protein__unknown_function:location=Pf3D7_10_v3:1423983-1425683(+):protein_length=566:sequence_SO=chromosome:SO=protein_coding_seq11', 'PF3D7_1035900.1-p1:transcript=PF3D7_1035900.1:gene=PF3D7_1035900:organism=Plasmodium_f…
QEQQQKE	{'PF3D7_1335400.1-p1:transcript=PF3D7_1335400.1:gene=PF3D7_1335400:organism=Plasmodium_falciparum_3D7:gene_product=reticulocyte_binding_protein_2_homologue_a:transcript_product=reticulocyte_binding_protein_2_homologue_a:location=Pf3D7_13_v3:1440779-1450385(+):protein_length=3130:sequence_SO=chromosome:SO=protein_coding_seq110', 'PF3D7_1335300.1-p1:transcript=PF3D7_1335300.1:gene=PF3D7_1335300:org…
DDNKNGD	{'PF3D7_0507800.1-p1:transcript=PF3D7_0507800.1:gene=PF3D7_0507800:organism=Plasmodium_falciparum_3D7:gene_product=conserved_Plasmodium_protein__unknown_function:transcript_product=conserved_Plasmodium_protein__unknown_function:location=Pf3D7_05_v3:322239-326822(+):protein_length=1527:sequence_SO=chromosome:SO=protein_coding_seq41', 'PF3D7_0722200.1-p1:transcript=PF3D7_0722200.1:gene=PF3D7_072220…
NKEKTNN|NKEKTQN	{'IT4var02_seq64', 'PF3D7_0202000.1-p1:transcript=PF3D7_0202000.1:gene=PF3D7_0202000:organism=Plasmodium_falciparum_3D7:gene_product=knob-associated_histidine-rich_protein:transcript_product=knob-associated_histidine-rich_protein:location=Pf3D7_02_v3:103385-105796(-):protein_length=654:sequence_SO=chromosome:SO=protein_coding_seq19', 'PF3D7_0202000.1-p1:transcript=PF3D7_0202000.1:gene=PF3D7_02020…
KNENKNE	{'PFIT_0914400.1-p1:transcript=PFIT_0914400.1:gene=PFIT_0914400:organism=Plasmodium_falciparum_IT:gene_product=met-10+_like_protein__putative:transcript_product=met-10+_like_protein__putative:location=PfIT_09_v3:594505-596989(-):protein_length=771:sequence_SO=chromosome:SO=protein_coding_seq24', 'PF3D7_1330800.1-p1:transcript=PF3D7_1330800.1:gene=PF3D7_1330800:organism=Plasmodium_falciparum_3D7:g…
KNVSEEI	{'PF3D7_1149000.1-p1:transcript=PF3D7_1149000.1:gene=PF3D7_1149000:organism=Plasmodium_falciparum_3D7:gene_product=antigen_332__DBL-like_protein:transcript_product=antigen_332__DBL-like_protein:location=Pf3D7_11_v3:1950210-1968726(+):protein_length=6093:sequence_SO=chromosome:SO=protein_coding_seq33', 'PF3D7_1149000.1-p1:transcript=PF3D7_1149000.1:gene=PF3D7_1149000:organism=Plasmodium_falciparum…
GDNNKKD|GDNNKKE	{'TM284S2var1_seq47', 'PF3D7_1019700.1-p1:transcript=PF3D7_1019700.1:gene=PF3D7_1019700:organism=Plasmodium_falciparum_3D7:gene_product=conserved_Plasmodium_protein__unknown_function:transcript_product=conserved_Plasmodium_protein__unknown_function:location=Pf3D7_10_v3:800278-803502(-):protein_length=1074:sequence_SO=chromosome:SO=protein_coding_seq14', 'PF3D7_1019700.1-p1:transcript=PF3D7_101970…
QEKERLE	{'PF3D7_1335300.1-p1:transcript=PF3D7_1335300.1:gene=PF3D7_1335300:organism=Plasmodium_falciparum_3D7:gene_product=reticulocyte_binding_protein_2_homologue_b:transcript_product=reticulocyte_binding_protein_2_homologue_b:location=Pf3D7_13_v3:1428874-1438852(-):protein_length=3254:sequence_SO=chromosome:SO=protein_coding_seq108', 'PF3D7_1335400.1-p1:transcript=PF3D7_1335400.1:gene=PF3D7_1335400:org…
RERLEKA	{'PF3D7_1335400.1-p1:transcript=PF3D7_1335400.1:gene=PF3D7_1335400:organism=Plasmodium_falciparum_3D7:gene_product=reticulocyte_binding_protein_2_homologue_a:transcript_product=reticulocyte_binding_protein_2_homologue_a:location=Pf3D7_13_v3:1440779-1450385(+):protein_length=3130:sequence_SO=chromosome:SO=protein_coding_seq106', 'PF3D7_1335300.1-p1:transcript=PF3D7_1335300.1:gene=PF3D7_1335300:org…
EEDVEED	{'PF3D7_0220000.1-p1:transcript=PF3D7_0220000.1:gene=PF3D7_0220000:organism=Plasmodium_falciparum_3D7:gene_product=liver_stage_antigen_3:transcript_product=liver_stage_antigen_3:location=Pf3D7_02_v3:796752-801586(+):protein_length=1558:sequence_SO=chromosome:SO=protein_coding_seq52', 'PF3D7_0220000.1-p1:transcript=PF3D7_0220000.1:gene=PF3D7_0220000:organism=Plasmodium_falciparum_3D7:gene_product=…
GDEKLIL	{'PF3D7_1335400.1-p1:transcript=PF3D7_1335400.1:gene=PF3D7_1335400:organism=Plasmodium_falciparum_3D7:gene_product=reticulocyte_binding_protein_2_homologue_a:transcript_product=reticulocyte_binding_protein_2_homologue_a:location=Pf3D7_13_v3:1440779-1450385(+):protein_length=3130:sequence_SO=chromosome:SO=protein_coding_seq106', 'PF3D7_1335300.1-p1:transcript=PF3D7_1335300.1:gene=PF3D7_1335300:org…
VKKVIKK	{'PF3D7_0500800.1-p1:transcript=PF3D7_0500800.1:gene=PF3D7_0500800:organism=Plasmodium_falciparum_3D7:gene_product=mature_parasite-infected_erythrocyte_surface_antigen:transcript_product=mature_parasite-infected_erythrocyte_surface_antigen:location=Pf3D7_05_v3:43327-47761(-):protein_length=1434:sequence_SO=chromosome:SO=protein_coding_seq32', 'PF3D7_1016300.1-p1:transcript=PF3D7_1016300.1:gene=PF…
KNNNNKK	{'PF3D7_1321100.1-p1:transcript=PF3D7_1321100.1:gene=PF3D7_1321100:organism=Plasmodium_falciparum_3D7:gene_product=conserved_Plasmodium_protein__unknown_function:transcript_product=conserved_Plasmodium_protein__unknown_function:location=Pf3D7_13_v3:861442-872332(-):protein_length=3447:sequence_SO=chromosome:SO=protein_coding_seq6', 'PF3D7_1456000.1-p1:transcript=PF3D7_1456000.1:gene=PF3D7_1456000…
NGNVNGN	{'PF3D7_1406600.1-p1:transcript=PF3D7_1406600.1:gene=PF3D7_1406600:organism=Plasmodium_falciparum_3D7:gene_product=ATP-dependent_Clp_protease_regulatory_subunit_ClpC__putative:transcript_product=ATP-dependent_Clp_protease_regulatory_subunit_ClpC__putative:location=Pf3D7_14_v3:239747-243772(+):protein_length=1341:sequence_SO=chromosome:SO=protein_coding_seq7', 'PF3D7_0407800.1-p1:transcript=PF3D7_…
NKNGDDN|NKQGDDN	{'PF3D7_0507800.1-p1:transcript=PF3D7_0507800.1:gene=PF3D7_0507800:organism=Plasmodium_falciparum_3D7:gene_product=conserved_Plasmodium_protein__unknown_function:transcript_product=conserved_Plasmodium_protein__unknown_function:location=Pf3D7_05_v3:322239-326822(+):protein_length=1527:sequence_SO=chromosome:SO=protein_coding_seq41', 'PF3D7_0309200.1-p1:transcript=PF3D7_0309200.1:gene=PF3D7_030920…
DQKDQKD	{'PF3D7_1023100.1-p1:transcript=PF3D7_1023100.1:gene=PF3D7_1023100:organism=Plasmodium_falciparum_3D7:gene_product=dynein_heavy_chain__putative:transcript_product=dynein_heavy_chain__putative:location=Pf3D7_10_v3:963497-980560(-):protein_length=5687:sequence_SO=chromosome:SO=protein_coding_seq82', 'PF3D7_1023100.1-p1:transcript=PF3D7_1023100.1:gene=PF3D7_1023100:organism=Plasmodium_falciparum_3D7…
EDDKNEK|EEDKNEK	{'PF3D7_1035300.1-p1:transcript=PF3D7_1035300.1:gene=PF3D7_1035300:organism=Plasmodium_falciparum_3D7:gene_product=glutamate-rich_protein:transcript_product=glutamate-rich_protein:location=Pf3D7_10_v3:1399195-1402896(+):protein_length=1233:sequence_SO=chromosome:SO=protein_coding_seq36', 'PF3D7_1035300.1-p1:transcript=PF3D7_1035300.1:gene=PF3D7_1035300:organism=Plasmodium_falciparum_3D7:gene_prod…
VNLSDKN	{'PF3D7_0919900.1-p1:transcript=PF3D7_0919900.1:gene=PF3D7_0919900:organism=Plasmodium_falciparum_3D7:gene_product=regulator_of_chromosome_condensation__putative:transcript_product=regulator_of_chromosome_condensation__putative:location=Pf3D7_09_v3:809659-819804(-):protein_length=3381:sequence_SO=chromosome:SO=protein_coding_seq24', 'PFIT_0920000.1-p1:transcript=PFIT_0920000.1:gene=PFIT_0920000:o…
PEEVLPE|PEEVVPE	{'PF3D7_1038400.1-p1:transcript=PF3D7_1038400.1:gene=PF3D7_1038400:organism=Plasmodium_falciparum_3D7:gene_product=gametocyte-specific_protein:transcript_product=gametocyte-specific_protein:location=Pf3D7_10_v3:1519021-1547825(+):protein_length=9563:sequence_SO=chromosome:SO=protein_coding_seq271', 'PF3D7_1038400.1-p1:transcript=PF3D7_1038400.1:gene=PF3D7_1038400:organism=Plasmodium_falciparum_3D…
NGDDNKN	{'PF3D7_0722200.1-p1:transcript=PF3D7_0722200.1:gene=PF3D7_0722200:organism=Plasmodium_falciparum_3D7:gene_product=rhoptry-associated_leucine_zipper-like_protein_1:transcript_product=rhoptry-associated_leucine_zipper-like_protein_1:location=Pf3D7_07_v3:946363-948612(+):protein_length=749:sequence_SO=chromosome:SO=protein_coding_seq18', 'PF3D7_0507800.1-p1:transcript=PF3D7_0507800.1:gene=PF3D7_050…
KKKKRYD|KKRKRYD	{'PF3D7_0308100.1-p1:transcript=PF3D7_0308100.1:gene=PF3D7_0308100:organism=Plasmodium_falciparum_3D7:gene_product=zinc_finger_protein__putative:transcript_product=zinc_finger_protein__putative:location=Pf3D7_03_v3:356319-361454(+):protein_length=1711:sequence_SO=chromosome:SO=protein_coding_seq37', 'PF3D7_1366300.1-p1:transcript=PF3D7_1366300.1:gene=PF3D7_1366300:organism=Plasmodium_falciparum_3…
EEIIEEK	{'PF3D7_1038400.1-p1:transcript=PF3D7_1038400.1:gene=PF3D7_1038400:organism=Plasmodium_falciparum_3D7:gene_product=gametocyte-specific_protein:transcript_product=gametocyte-specific_protein:location=Pf3D7_10_v3:1519021-1547825(+):protein_length=9563:sequence_SO=chromosome:SO=protein_coding_seq87', 'PF3D7_1038400.1-p1:transcript=PF3D7_1038400.1:gene=PF3D7_1038400:organism=Plasmodium_falciparum_3D7…
EILPEEL	{'PF3D7_1038400.1-p1:transcript=PF3D7_1038400.1:gene=PF3D7_1038400:organism=Plasmodium_falciparum_3D7:gene_product=gametocyte-specific_protein:transcript_product=gametocyte-specific_protein:location=Pf3D7_10_v3:1519021-1547825(+):protein_length=9563:sequence_SO=chromosome:SO=protein_coding_seq85', 'PF3D7_1038400.1-p1:transcript=PF3D7_1038400.1:gene=PF3D7_1038400:organism=Plasmodium_falciparum_3D7…
DIKRDNI|EIKRDNI	{'PF3D7_0704300.1-p1:transcript=PF3D7_0704300.1:gene=PF3D7_0704300:organism=Plasmodium_falciparum_3D7:gene_product=conserved_Plasmodium_membrane_protein__unknown_function:transcript_product=conserved_Plasmodium_membrane_protein__unknown_function:location=Pf3D7_07_v3:197691-203249(+):protein_length=1852:sequence_SO=chromosome:SO=protein_coding_seq25', 'PF3D7_0718000.1-p1:transcript=PF3D7_0718000.1…
SGPSGTS	{'Plasmodiumfalciparum_AMA1_[K1_allele]_full-length_seq3', 'Plasmodiumfalciparum_AMA1_[K1_allele]_full-length_seq2', 'Plasmodiumfalciparum_AMA1_[K1_allele]_full-length_seq4', 'PF3D7_0930300.1-p1:transcript=PF3D7_0930300.1:gene=PF3D7_0930300:organism=Plasmodium_falciparum_3D7:gene_product=merozoite_surface_protein_1:transcript_product=merozoite_surface_protein_1:location=Pf3D7_09_v3:1201812-120697…
NTLPRSN	{'Plasmodiumfalciparum_AMA1_[K1_allele]_full-length_seq4', 'PF3D7_0930300.1-p1:transcript=PF3D7_0930300.1:gene=PF3D7_0930300:organism=Plasmodium_falciparum_3D7:gene_product=merozoite_surface_protein_1:transcript_product=merozoite_surface_protein_1:location=Pf3D7_09_v3:1201812-1206974(+):protein_length=1720:sequence_SO=chromosome:SO=protein_coding_seq5', 'PF3D7_0930300.1-p1:transcript=PF3D7_093030…
LDSEEIK	{'PF3D7_1149000.1-p1:transcript=PF3D7_1149000.1:gene=PF3D7_1149000:organism=Plasmodium_falciparum_3D7:gene_product=antigen_332__DBL-like_protein:transcript_product=antigen_332__DBL-like_protein:location=Pf3D7_11_v3:1950210-1968726(+):protein_length=6093:sequence_SO=chromosome:SO=protein_coding_seq169', 'PF3D7_1149000.1-p1:transcript=PF3D7_1149000.1:gene=PF3D7_1149000:organism=Plasmodium_falciparu…
EGQTHSE	{'anodir_cE5-anophelin:ADIR011024::_seq3', 'PF3D7_1035300.1-p1:transcript=PF3D7_1035300.1:gene=PF3D7_1035300:organism=Plasmodium_falciparum_3D7:gene_product=glutamate-rich_protein:transcript_product=glutamate-rich_protein:location=Pf3D7_10_v3:1399195-1402896(+):protein_length=1233:sequence_SO=chromosome:SO=protein_coding_seq4', 'PF3D7_1035300.1-p1:transcript=PF3D7_1035300.1:gene=PF3D7_1035300:org…
ERLQKEE	{'PF3D7_1335400.1-p1:transcript=PF3D7_1335400.1:gene=PF3D7_1335400:organism=Plasmodium_falciparum_3D7:gene_product=reticulocyte_binding_protein_2_homologue_a:transcript_product=reticulocyte_binding_protein_2_homologue_a:location=Pf3D7_13_v3:1440779-1450385(+):protein_length=3130:sequence_SO=chromosome:SO=protein_coding_seq110', 'PF3D7_1335400.1-p1:transcript=PF3D7_1335400.1:gene=PF3D7_1335400:org…
QIMKAWA|QIMKAYA	{'PF3D7_1401000.1-p1:transcript=PF3D7_1401000.1:gene=PF3D7_1401000:organism=Plasmodium_falciparum_3D7:gene_product=glycophorin_binding_protein:transcript_product=glycophorin_binding_protein:location=Pf3D7_14_v3:34693-35773(-):protein_length=307:sequence_SO=chromosome:SO=protein_coding_seq11', 'PF3D7_1401000.1-p1:transcript=PF3D7_1401000.1:gene=PF3D7_1401000:organism=Plasmodium_falciparum_3D7:gene…
EIVEEEV	{'PF3D7_1149000.1-p1:transcript=PF3D7_1149000.1:gene=PF3D7_1149000:organism=Plasmodium_falciparum_3D7:gene_product=antigen_332__DBL-like_protein:transcript_product=antigen_332__DBL-like_protein:location=Pf3D7_11_v3:1950210-1968726(+):protein_length=6093:sequence_SO=chromosome:SO=protein_coding_seq81', 'PF3D7_1149000.1-p1:transcript=PF3D7_1149000.1:gene=PF3D7_1149000:organism=Plasmodium_falciparum…
AKQEEER	{'PF3D7_1335300.1-p1:transcript=PF3D7_1335300.1:gene=PF3D7_1335300:organism=Plasmodium_falciparum_3D7:gene_product=reticulocyte_binding_protein_2_homologue_b:transcript_product=reticulocyte_binding_protein_2_homologue_b:location=Pf3D7_13_v3:1428874-1438852(-):protein_length=3254:sequence_SO=chromosome:SO=protein_coding_seq108', 'PF3D7_1335400.1-p1:transcript=PF3D7_1335400.1:gene=PF3D7_1335400:org…
EKHDDNN|EKRDDNN	{'PF3D7_0712000.1-p1:transcript=PF3D7_0712000.1:gene=PF3D7_0712000:organism=Plasmodium_falciparum_3D7:gene_product=erythrocyte_membrane_protein_1__PfEMP1:transcript_product=erythrocyte_membrane_protein_1__PfEMP1:location=Pf3D7_07_v3:527338-535131(-):protein_length=2275:sequence_SO=chromosome:SO=protein_coding_seq19', 'PFIT_bin00100.1-p1:transcript=PFIT_bin00100.1:gene=PFIT_bin00100:organism=Plasm…
VVVNLSD	{'PF3D7_0919900.1-p1:transcript=PF3D7_0919900.1:gene=PF3D7_0919900:organism=Plasmodium_falciparum_3D7:gene_product=regulator_of_chromosome_condensation__putative:transcript_product=regulator_of_chromosome_condensation__putative:location=Pf3D7_09_v3:809659-819804(-):protein_length=3381:sequence_SO=chromosome:SO=protein_coding_seq24', 'PFIT_0920000.1-p1:transcript=PFIT_0920000.1:gene=PFIT_0920000:o…
ENIMSGD|ENIMSGE	{'PFIT_1342100.1-p1:transcript=PFIT_1342100.1:gene=PFIT_1342100:organism=Plasmodium_falciparum_IT:gene_product=transcription_factor_with_AP2_domain(s):transcript_product=transcription_factor_with_AP2_domain(s):location=PfIT_13_v3:1634784-1646174(-):protein_length=3796:sequence_SO=chromosome:SO=protein_coding_seq29', 'PF3D7_1342900.1-p1:transcript=PF3D7_1342900.1:gene=PF3D7_1342900:organism=Plasmo…
DEKLILK	{'PF3D7_1335400.1-p1:transcript=PF3D7_1335400.1:gene=PF3D7_1335400:organism=Plasmodium_falciparum_3D7:gene_product=reticulocyte_binding_protein_2_homologue_a:transcript_product=reticulocyte_binding_protein_2_homologue_a:location=Pf3D7_13_v3:1440779-1450385(+):protein_length=3130:sequence_SO=chromosome:SO=protein_coding_seq106', 'PF3D7_1335300.1-p1:transcript=PF3D7_1335300.1:gene=PF3D7_1335300:org…
SGDDNKS	{'PF3D7_0507800.1-p1:transcript=PF3D7_0507800.1:gene=PF3D7_0507800:organism=Plasmodium_falciparum_3D7:gene_product=conserved_Plasmodium_protein__unknown_function:transcript_product=conserved_Plasmodium_protein__unknown_function:location=Pf3D7_05_v3:322239-326822(+):protein_length=1527:sequence_SO=chromosome:SO=protein_coding_seq41', 'PFIT_1105400.1-p1:transcript=PFIT_1105400.1:gene=PFIT_1105400:o…
NMENNDD	{'PFIT_1120200.1-p1:transcript=PFIT_1120200.1:gene=PFIT_1120200:organism=Plasmodium_falciparum_IT:gene_product=ubiquitin-protein_ligase__putative:transcript_product=ubiquitin-protein_ligase__putative:location=PfIT_11_v3:660584-666901(+):protein_length=2105:sequence_SO=chromosome:SO=protein_coding_seq75', 'PFIT_1120200.1-p1:transcript=PFIT_1120200.1:gene=PFIT_1120200:organism=Plasmodium_falciparum…
DDKNNDN	{'PF3D7_0918700.1-p1:transcript=PF3D7_0918700.1:gene=PF3D7_0918700:organism=Plasmodium_falciparum_3D7:gene_product=conserved_Plasmodium_protein__unknown_function:transcript_product=conserved_Plasmodium_protein__unknown_function:location=Pf3D7_09_v3:769452-772105(+):protein_length=737:sequence_SO=chromosome:SO=protein_coding_seq14', 'PF3D7_0918700.1-p1:transcript=PF3D7_0918700.1:gene=PF3D7_0918700…
EEAEEIK	{'PF3D7_0220000.1-p1:transcript=PF3D7_0220000.1:gene=PF3D7_0220000:organism=Plasmodium_falciparum_3D7:gene_product=liver_stage_antigen_3:transcript_product=liver_stage_antigen_3:location=Pf3D7_02_v3:796752-801586(+):protein_length=1558:sequence_SO=chromosome:SO=protein_coding_seq46', 'HB3var24_seq30', 'PF3D7_0220000.1-p1:transcript=PF3D7_0220000.1:gene=PF3D7_0220000:organism=Plasmodium_falciparum…
EEIIEEV	{'PF3D7_1038400.1-p1:transcript=PF3D7_1038400.1:gene=PF3D7_1038400:organism=Plasmodium_falciparum_3D7:gene_product=gametocyte-specific_protein:transcript_product=gametocyte-specific_protein:location=Pf3D7_10_v3:1519021-1547825(+):protein_length=9563:sequence_SO=chromosome:SO=protein_coding_seq200', 'PF3D7_1038400.1-p1:transcript=PF3D7_1038400.1:gene=PF3D7_1038400:organism=Plasmodium_falciparum_3D…
EYRKHVN	{'PF3D7_1401000.1-p1:transcript=PF3D7_1401000.1:gene=PF3D7_1401000:organism=Plasmodium_falciparum_3D7:gene_product=glycophorin_binding_protein:transcript_product=glycophorin_binding_protein:location=Pf3D7_14_v3:34693-35773(-):protein_length=307:sequence_SO=chromosome:SO=protein_coding_seq11', 'PF3D7_1401000.1-p1:transcript=PF3D7_1401000.1:gene=PF3D7_1401000:organism=Plasmodium_falciparum_3D7:gene…
EEVEENV|EEVEEQV	{'PF3D7_0102200.1-p1:transcript=PF3D7_0102200.1:gene=PF3D7_0102200:organism=Plasmodium_falciparum_3D7:gene_product=ring-infected_erythrocyte_surface_antigen:transcript_product=ring-infected_erythrocyte_surface_antigen:location=Pf3D7_01_v3:98819-102282(+):protein_length=1085:sequence_SO=chromosome:SO=protein_coding_seq38', 'PF3D7_0102200.1-p1:transcript=PF3D7_0102200.1:gene=PF3D7_0102200:organism=…
RQEQERL	{'PF3D7_1335400.1-p1:transcript=PF3D7_1335400.1:gene=PF3D7_1335400:organism=Plasmodium_falciparum_3D7:gene_product=reticulocyte_binding_protein_2_homologue_a:transcript_product=reticulocyte_binding_protein_2_homologue_a:location=Pf3D7_13_v3:1440779-1450385(+):protein_length=3130:sequence_SO=chromosome:SO=protein_coding_seq110', 'PF3D7_1335400.1-p1:transcript=PF3D7_1335400.1:gene=PF3D7_1335400:org…
VKNDVKN	{'PF3D7_1404900.1-p1:transcript=PF3D7_1404900.1:gene=PF3D7_1404900:organism=Plasmodium_falciparum_3D7:gene_product=conserved_Plasmodium_protein__unknown_function:transcript_product=conserved_Plasmodium_protein__unknown_function:location=Pf3D7_14_v3:170000-170893(+):protein_length=297:sequence_SO=chromosome:SO=protein_coding_seq2', 'PF3D7_0611800.1-p1:transcript=PF3D7_0611800.1:gene=PF3D7_0611800:…
GPSGPSG	{'Plasmodiumfalciparum_AMA1_[K1_allele]_full-length_seq3', 'Plasmodiumfalciparum_AMA1_[K1_allele]_full-length_seq2', 'Plasmodiumfalciparum_AMA1_[K1_allele]_full-length_seq4', 'PF3D7_0930300.1-p1:transcript=PF3D7_0930300.1:gene=PF3D7_0930300:organism=Plasmodium_falciparum_3D7:gene_product=merozoite_surface_protein_1:transcript_product=merozoite_surface_protein_1:location=Pf3D7_09_v3:1201812-120697…
SPSSRSN	{'Plasmodiumfalciparum_AMA1_[K1_allele]_full-length_seq4', 'PF3D7_0930300.1-p1:transcript=PF3D7_0930300.1:gene=PF3D7_0930300:organism=Plasmodium_falciparum_3D7:gene_product=merozoite_surface_protein_1:transcript_product=merozoite_surface_protein_1:location=Pf3D7_09_v3:1201812-1206974(+):protein_length=1720:sequence_SO=chromosome:SO=protein_coding_seq5', 'PF3D7_0930300.1-p1:transcript=PF3D7_093030…
EYITEEE	{'PF3D7_1229600.1-p1:transcript=PF3D7_1229600.1:gene=PF3D7_1229600:organism=Plasmodium_falciparum_3D7:gene_product=conserved_Plasmodium_protein__unknown_function:transcript_product=conserved_Plasmodium_protein__unknown_function:location=Pf3D7_12_v3:1214043-1217715(-):protein_length=1163:sequence_SO=chromosome:SO=protein_coding_seq22', 'PF3D7_1036300.1-p1:transcript=PF3D7_1036300.1:gene=PF3D7_1036…
NVQNLQN	{'PFIT_0914100.1-p1:transcript=PFIT_0914100.1:gene=PFIT_0914100:organism=Plasmodium_falciparum_IT:gene_product=pseudouridylate_synthase__putative:transcript_product=pseudouridylate_synthase__putative:location=PfIT_09_v3:579330-582215(+):protein_length=961:sequence_SO=chromosome:SO=protein_coding_seq19', 'PFIT_0914100.1-p1:transcript=PFIT_0914100.1:gene=PFIT_0914100:organism=Plasmodium_falciparum_…
NDISSKE|NDISTKE	{'PF3D7_0530900.1-p1:transcript=PF3D7_0530900.1:gene=PF3D7_0530900:organism=Plasmodium_falciparum_3D7:gene_product=formin_1:transcript_product=formin_1:location=Pf3D7_05_v3:1257723-1265750(-):protein_length=2675:sequence_SO=chromosome:SO=protein_coding_seq71', 'IT4var02_seq65', 'IT4var02_seq64', 'PFIT_bin08900.1-p1:transcript=PFIT_bin08900.1:gene=PFIT_bin08900:organism=Plasmodium_falciparum_IT:ge…
VPEEVVE	{'PF3D7_1038400.1-p1:transcript=PF3D7_1038400.1:gene=PF3D7_1038400:organism=Plasmodium_falciparum_3D7:gene_product=gametocyte-specific_protein:transcript_product=gametocyte-specific_protein:location=Pf3D7_10_v3:1519021-1547825(+):protein_length=9563:sequence_SO=chromosome:SO=protein_coding_seq247', 'PF3D7_1035900.1-p1:transcript=PF3D7_1035900.1:gene=PF3D7_1035900:organism=Plasmodium_falciparum_3D…
DSNNMDI|DSNNMDV	{'PFIT_0731700.1-p1:transcript=PFIT_0731700.1:gene=PFIT_0731700:organism=Plasmodium_falciparum_IT:gene_product=erythrocyte_membrane_protein_1__PfEMP1:transcript_product=erythrocyte_membrane_protein_1__PfEMP1:location=PfIT_07_v3:1391055-1398246(-):protein_length=2073:sequence_SO=chromosome:SO=protein_coding_seq82', 'HB3var08_seq130', 'PF3D7_0426000.1-p1:transcript=PF3D7_0426000.1:gene=PF3D7_042600…
EEITTKG	{'PF3D7_0930300.1-p1:transcript=PF3D7_0930300.1:gene=PF3D7_0930300:organism=Plasmodium_falciparum_3D7:gene_product=merozoite_surface_protein_1:transcript_product=merozoite_surface_protein_1:location=Pf3D7_09_v3:1201812-1206974(+):protein_length=1720:sequence_SO=chromosome:SO=protein_coding_seq3', 'Plasmodiumfalciparum_AMA1_[K1_allele]_full-length_seq2', 'PF3D7_0930300.1-p1:transcript=PF3D7_093030…
NNNTKTT	{'PF3D7_0702300.1-p1:transcript=PF3D7_0702300.1:gene=PF3D7_0702300:organism=Plasmodium_falciparum_3D7:gene_product=sporozoite_threonine_and_asparagine-rich_protein:transcript_product=sporozoite_threonine_and_asparagine-rich_protein:location=Pf3D7_07_v3:96761-98730(+):protein_length=594:sequence_SO=chromosome:SO=protein_coding_seq16', 'RAJ116var17_seq5', 'RAJ116var17_seq6', 'PF3D7_0702300.1-p1:tra…
NDKNEKN	{'PF3D7_1434500.1-p1:transcript=PF3D7_1434500.1:gene=PF3D7_1434500:organism=Plasmodium_falciparum_3D7:gene_product=dynein-related_AAA-type_ATPase__putative:transcript_product=dynein-related_AAA-type_ATPase__putative:location=Pf3D7_14_v3:1378348-1402665(-):protein_length=8105:sequence_SO=chromosome:SO=protein_coding_seq290', 'PFIT_0719200.1-p1:transcript=PFIT_0719200.1:gene=PFIT_0719200:organism=P…
INNDKNN	{'PF3D7_1103400.1-p1:transcript=PF3D7_1103400.1:gene=PF3D7_1103400:organism=Plasmodium_falciparum_3D7:gene_product=FeS_cluster_assembly_protein_SufD__putative:transcript_product=FeS_cluster_assembly_protein_SufD__putative:location=Pf3D7_11_v3:146427-150815(+):protein_length=1462:sequence_SO=chromosome:SO=protein_coding_seq10', 'PF3D7_0510000.1-p1:transcript=PF3D7_0510000.1:gene=PF3D7_0510000:orga…
NNKNENK	{'PFIT_1224800.1-p1:transcript=PFIT_1224800.1:gene=PFIT_1224800:organism=Plasmodium_falciparum_IT:gene_product=isoleucine--tRNA_ligase__putative:transcript_product=isoleucine--tRNA_ligase__putative:location=PfIT_12_v3:971180-976688(+):protein_length=1698:sequence_SO=chromosome:SO=protein_coding_seq40', 'PF3D7_0500800.1-p1:transcript=PF3D7_0500800.1:gene=PF3D7_0500800:organism=Plasmodium_falciparu…
KEEEERK	{'RAJ116var24_seq40', 'PF3D7_1335400.1-p1:transcript=PF3D7_1335400.1:gene=PF3D7_1335400:organism=Plasmodium_falciparum_3D7:gene_product=reticulocyte_binding_protein_2_homologue_a:transcript_product=reticulocyte_binding_protein_2_homologue_a:location=Pf3D7_13_v3:1440779-1450385(+):protein_length=3130:sequence_SO=chromosome:SO=protein_coding_seq106', 'PF3D7_1335300.1-p1:transcript=PF3D7_1335300.1:g…
EDIIKEN|EDIVKEN	{'PF3D7_1035600.1-p1:transcript=PF3D7_1035600.1:gene=PF3D7_1035600:organism=Plasmodium_falciparum_3D7:gene_product=merozoite_surface_protein:transcript_product=merozoite_surface_protein:location=Pf3D7_10_v3:1409281-1410555(+):protein_length=424:sequence_SO=chromosome:SO=protein_coding_seq11', 'PF3D7_1035600.1-p1:transcript=PF3D7_1035600.1:gene=PF3D7_1035600:organism=Plasmodium_falciparum_3D7:gene…
KDGDKIK	{'PFIT_0920000.1-p1:transcript=PFIT_0920000.1:gene=PFIT_0920000:organism=Plasmodium_falciparum_IT:gene_product=regulator_of_chromosome_condensation__putative:transcript_product=regulator_of_chromosome_condensation__putative:location=PfIT_09_v3:790912-800562(-):protein_length=3216:sequence_SO=chromosome:SO=protein_coding_seq24', 'PF3D7_0919900.1-p1:transcript=PF3D7_0919900.1:gene=PF3D7_0919900:org…
DLLFDLE	{'PF3D7_1149200.1-p1:transcript=PF3D7_1149200.1:gene=PF3D7_1149200:organism=Plasmodium_falciparum_3D7:gene_product=ring-infected_erythrocyte_surface_antigen:transcript_product=ring-infected_erythrocyte_surface_antigen:location=Pf3D7_11_v3:1976407-1979804(+):protein_length=1090:sequence_SO=chromosome:SO=protein_coding_seq17', 'PF3D7_0102200.1-p1:transcript=PF3D7_0102200.1:gene=PF3D7_0102200:organi…
DKNDEND|DKNDENE	{'PF3D7_0703900.1-p1:transcript=PF3D7_0703900.1:gene=PF3D7_0703900:organism=Plasmodium_falciparum_3D7:gene_product=conserved_Plasmodium_membrane_protein__unknown_function:transcript_product=conserved_Plasmodium_membrane_protein__unknown_function:location=Pf3D7_07_v3:153320-166396(-):protein_length=4358:sequence_SO=chromosome:SO=protein_coding_seq10', 'PF3D7_1230500.1-p1:transcript=PF3D7_1230500.1…
NNNKKKN	{'PFIT_1029700.1-p1:transcript=PFIT_1029700.1:gene=PFIT_1029700:organism=Plasmodium_falciparum_IT:gene_product=conserved_Plasmodium_protein__unknown_function:transcript_product=conserved_Plasmodium_protein__unknown_function:location=PfIT_10_v3:1168291-1171638(-):protein_length=1115:sequence_SO=chromosome:SO=protein_coding_seq40', 'PF3D7_1324300.1-p1:transcript=PF3D7_1324300.1:gene=PF3D7_1324300:o…
KERERLE	{'PF3D7_1335400.1-p1:transcript=PF3D7_1335400.1:gene=PF3D7_1335400:organism=Plasmodium_falciparum_3D7:gene_product=reticulocyte_binding_protein_2_homologue_a:transcript_product=reticulocyte_binding_protein_2_homologue_a:location=Pf3D7_13_v3:1440779-1450385(+):protein_length=3130:sequence_SO=chromosome:SO=protein_coding_seq106', 'PF3D7_1335300.1-p1:transcript=PF3D7_1335300.1:gene=PF3D7_1335300:org…
VLLKEEV|VVLKEEV	{'PFIT_0731700.1-p1:transcript=PFIT_0731700.1:gene=PFIT_0731700:organism=Plasmodium_falciparum_IT:gene_product=erythrocyte_membrane_protein_1__PfEMP1:transcript_product=erythrocyte_membrane_protein_1__PfEMP1:location=PfIT_07_v3:1391055-1398246(-):protein_length=2073:sequence_SO=chromosome:SO=protein_coding_seq43', 'PFCLINvar37_seq48', 'PFCLINvar37_seq49', 'PF3D7_0220000.1-p1:transcript=PF3D7_0220…
IKEDVKE	{'PF3D7_0715200.1-p1:transcript=PF3D7_0715200.1:gene=PF3D7_0715200:organism=Plasmodium_falciparum_3D7:gene_product=conserved_Plasmodium_protein__unknown_function:transcript_product=conserved_Plasmodium_protein__unknown_function:location=Pf3D7_07_v3:676061-682681(-):protein_length=2206:sequence_SO=chromosome:SO=protein_coding_seq20', 'PFIT_0713300.1-p1:transcript=PFIT_0713300.1:gene=PFIT_0713300:o…
TQKDQKD	{'PF3D7_1023100.1-p1:transcript=PF3D7_1023100.1:gene=PF3D7_1023100:organism=Plasmodium_falciparum_3D7:gene_product=dynein_heavy_chain__putative:transcript_product=dynein_heavy_chain__putative:location=Pf3D7_10_v3:963497-980560(-):protein_length=5687:sequence_SO=chromosome:SO=protein_coding_seq81', 'PFIT_1022600.1-p1:transcript=PFIT_1022600.1:gene=PFIT_1022600:organism=Plasmodium_falciparum_IT:gen…
NQSNKKT	{'PFIT_1435800.1-p1:transcript=PFIT_1435800.1:gene=PFIT_1435800:organism=Plasmodium_falciparum_IT:gene_product=methionine_aminopeptidase_2:transcript_product=methionine_aminopeptidase_2:location=PfIT_14_v3:1430017-1431906(+):protein_length=629:sequence_SO=chromosome:SO=protein_coding_seq4', 'PF3D7_1004600.1-p1:transcript=PF3D7_1004600.1:gene=PF3D7_1004600:organism=Plasmodium_falciparum_3D7:gene_p…
SDALYTD	{'PF3D7_1149200.1-p1:transcript=PF3D7_1149200.1:gene=PF3D7_1149200:organism=Plasmodium_falciparum_3D7:gene_product=ring-infected_erythrocyte_surface_antigen:transcript_product=ring-infected_erythrocyte_surface_antigen:location=Pf3D7_11_v3:1976407-1979804(+):protein_length=1090:sequence_SO=chromosome:SO=protein_coding_seq17', 'PF3D7_0102200.1-p1:transcript=PF3D7_0102200.1:gene=PF3D7_0102200:organi…
NVEENIE|NVEENVE	{'PF3D7_1149200.1-p1:transcript=PF3D7_1149200.1:gene=PF3D7_1149200:organism=Plasmodium_falciparum_3D7:gene_product=ring-infected_erythrocyte_surface_antigen:transcript_product=ring-infected_erythrocyte_surface_antigen:location=Pf3D7_11_v3:1976407-1979804(+):protein_length=1090:sequence_SO=chromosome:SO=protein_coding_seq38', 'PF3D7_1149200.1-p1:transcript=PF3D7_1149200.1:gene=PF3D7_1149200:organi…
EKVLEEV	{'PF3D7_1038400.1-p1:transcript=PF3D7_1038400.1:gene=PF3D7_1038400:organism=Plasmodium_falciparum_3D7:gene_product=gametocyte-specific_protein:transcript_product=gametocyte-specific_protein:location=Pf3D7_10_v3:1519021-1547825(+):protein_length=9563:sequence_SO=chromosome:SO=protein_coding_seq362', 'PF3D7_1035900.1-p1:transcript=PF3D7_1035900.1:gene=PF3D7_1035900:organism=Plasmodium_falciparum_3D…
KQEKERL	{'PF3D7_1335300.1-p1:transcript=PF3D7_1335300.1:gene=PF3D7_1335300:organism=Plasmodium_falciparum_3D7:gene_product=reticulocyte_binding_protein_2_homologue_b:transcript_product=reticulocyte_binding_protein_2_homologue_b:location=Pf3D7_13_v3:1428874-1438852(-):protein_length=3254:sequence_SO=chromosome:SO=protein_coding_seq108', 'PF3D7_1335400.1-p1:transcript=PF3D7_1335400.1:gene=PF3D7_1335400:org…
EEDLYPR	{'PFIT_1478600.1-p1:transcript=PFIT_1478600.1:gene=PFIT_1478600:organism=Plasmodium_falciparum_IT:gene_product=Plasmodium_exported_protein_(PHISTb)__unknown_function:transcript_product=Plasmodium_exported_protein_(PHISTb)__unknown_function:location=PfIT_14_v3:3210330-3211978(+):protein_length=494:sequence_SO=chromosome:SO=protein_coding_seq16', 'PF3D7_1477500.1-p1:transcript=PF3D7_1477500.1:gene=…
DIKSSDN|DIKSTDN	{'PF3D7_0702300.1-p1:transcript=PF3D7_0702300.1:gene=PF3D7_0702300:organism=Plasmodium_falciparum_3D7:gene_product=sporozoite_threonine_and_asparagine-rich_protein:transcript_product=sporozoite_threonine_and_asparagine-rich_protein:location=Pf3D7_07_v3:96761-98730(+):protein_length=594:sequence_SO=chromosome:SO=protein_coding_seq11', 'PF3D7_1348300.1-p1:transcript=PF3D7_1348300.1:gene=PF3D7_13483…
EEDIEED	{'PF3D7_0220000.1-p1:transcript=PF3D7_0220000.1:gene=PF3D7_0220000:organism=Plasmodium_falciparum_3D7:gene_product=liver_stage_antigen_3:transcript_product=liver_stage_antigen_3:location=Pf3D7_02_v3:796752-801586(+):protein_length=1558:sequence_SO=chromosome:SO=protein_coding_seq52', 'PF3D7_0220000.1-p1:transcript=PF3D7_0220000.1:gene=PF3D7_0220000:organism=Plasmodium_falciparum_3D7:gene_product=…
NVDGINN	{'PF3D7_0405300.1-p1:transcript=PF3D7_0405300.1:gene=PF3D7_0405300:organism=Plasmodium_falciparum_3D7:gene_product=liver_specific_protein_2__putative:transcript_product=liver_specific_protein_2__putative:location=Pf3D7_04_v3:282403-288297(-):protein_length=1964:sequence_SO=chromosome:SO=protein_coding_seq37', 'PF3D7_0405300.1-p1:transcript=PF3D7_0405300.1:gene=PF3D7_0405300:organism=Plasmodium_fa…
RLEREKQ	{'PF3D7_1335400.1-p1:transcript=PF3D7_1335400.1:gene=PF3D7_1335400:organism=Plasmodium_falciparum_3D7:gene_product=reticulocyte_binding_protein_2_homologue_a:transcript_product=reticulocyte_binding_protein_2_homologue_a:location=Pf3D7_13_v3:1440779-1450385(+):protein_length=3130:sequence_SO=chromosome:SO=protein_coding_seq110', 'PF3D7_1335300.1-p1:transcript=PF3D7_1335300.1:gene=PF3D7_1335300:org…
NNNFNHN|NNNFNKN	{'PF3D7_1224400.1-p1:transcript=PF3D7_1224400.1:gene=PF3D7_1224400:organism=Plasmodium_falciparum_3D7:gene_product=conserved_Plasmodium_protein__unknown_function:transcript_product=conserved_Plasmodium_protein__unknown_function:location=Pf3D7_12_v3:994255-996438(+):protein_length=595:sequence_SO=chromosome:SO=protein_coding_seq2', 'PF3D7_0518700.1-p1:transcript=PF3D7_0518700.1:gene=PF3D7_0518700:…
TEEVKEE	{'PF3D7_0500800.1-p1:transcript=PF3D7_0500800.1:gene=PF3D7_0500800:organism=Plasmodium_falciparum_3D7:gene_product=mature_parasite-infected_erythrocyte_surface_antigen:transcript_product=mature_parasite-infected_erythrocyte_surface_antigen:location=Pf3D7_05_v3:43327-47761(-):protein_length=1434:sequence_SO=chromosome:SO=protein_coding_seq27', 'PF3D7_0500800.1-p1:transcript=PF3D7_0500800.1:gene=PF…
QKEEALK	{'PF3D7_1335400.1-p1:transcript=PF3D7_1335400.1:gene=PF3D7_1335400:organism=Plasmodium_falciparum_3D7:gene_product=reticulocyte_binding_protein_2_homologue_a:transcript_product=reticulocyte_binding_protein_2_homologue_a:location=Pf3D7_13_v3:1440779-1450385(+):protein_length=3130:sequence_SO=chromosome:SO=protein_coding_seq110', 'PF3D7_1335400.1-p1:transcript=PF3D7_1335400.1:gene=PF3D7_1335400:org…
NDNINDN	{'PF3D7_1343900.1-p1:transcript=PF3D7_1343900.1:gene=PF3D7_1343900:organism=Plasmodium_falciparum_3D7:gene_product=U4/U6_small_nuclear_ribonucleoprotein_PRP4__putative:transcript_product=U4/U6_small_nuclear_ribonucleoprotein_PRP4__putative:location=Pf3D7_13_v3:1756212-1758158(+):protein_length=648:sequence_SO=chromosome:SO=protein_coding_seq15', 'PF3D7_1343900.1-p1:transcript=PF3D7_1343900.1:gene…
KNDDIKK|KNDEIKK	{'PF3D7_1359700.1-p1:transcript=PF3D7_1359700.1:gene=PF3D7_1359700:organism=Plasmodium_falciparum_3D7:gene_product=conserved_Plasmodium_protein__unknown_function:transcript_product=conserved_Plasmodium_protein__unknown_function:location=Pf3D7_13_v3:2381165-2392261(+):protein_length=3698:sequence_SO=chromosome:SO=protein_coding_seq37', 'PF3D7_1359700.1-p1:transcript=PF3D7_1359700.1:gene=PF3D7_1359…
EELVEKV	{'PF3D7_1035900.1-p1:transcript=PF3D7_1035900.1:gene=PF3D7_1035900:organism=Plasmodium_falciparum_3D7:gene_product=probable_protein__unknown_function:transcript_product=probable_protein__unknown_function:location=Pf3D7_10_v3:1423983-1425683(+):protein_length=566:sequence_SO=chromosome:SO=protein_coding_seq11', 'PF3D7_1035900.1-p1:transcript=PF3D7_1035900.1:gene=PF3D7_1035900:organism=Plasmodium_f…
KKGNDKE|KKGNEKE	{'PF3D7_1442600.1-p1:transcript=PF3D7_1442600.1:gene=PF3D7_1442600:organism=Plasmodium_falciparum_3D7:gene_product=TRAP-like_protein:transcript_product=TRAP-like_protein:location=Pf3D7_14_v3:1730087-1740916(+):protein_length=3543:sequence_SO=chromosome:SO=protein_coding_seq119', 'PF3D7_1442600.1-p1:transcript=PF3D7_1442600.1:gene=PF3D7_1442600:organism=Plasmodium_falciparum_3D7:gene_product=TRAP-…
VDEDNNN	{'PF3D7_0803100.1-p1:transcript=PF3D7_0803100.1:gene=PF3D7_0803100:organism=Plasmodium_falciparum_3D7:gene_product=U3_small_nucleolar_RNA-associated_protein_14__putative:transcript_product=U3_small_nucleolar_RNA-associated_protein_14__putative:location=Pf3D7_08_v3:199181-202918(-):protein_length=1245:sequence_SO=chromosome:SO=protein_coding_seq32', 'PF3D7_0803100.1-p1:transcript=PF3D7_0803100.1:g…
NDNTNSK	{'PF3D7_0613800.1-p1:transcript=PF3D7_0613800.1:gene=PF3D7_0613800:organism=Plasmodium_falciparum_3D7:gene_product=AP2_domain_transcription_factor__putative:transcript_product=AP2_domain_transcription_factor__putative:location=Pf3D7_06_v3:566139-578993(+):protein_length=4109:sequence_SO=chromosome:SO=protein_coding_seq47', 'PF3D7_0613800.1-p1:transcript=PF3D7_0613800.1:gene=PF3D7_0613800:organism…
NTDPNDE	{'PF3D7_1016300.1-p1:transcript=PF3D7_1016300.1:gene=PF3D7_1016300:organism=Plasmodium_falciparum_3D7:gene_product=glycophorin_binding_protein:transcript_product=glycophorin_binding_protein:location=Pf3D7_10_v3:650898-653567(-):protein_length=824:sequence_SO=chromosome:SO=protein_coding_seq31', 'PF3D7_1016300.1-p1:transcript=PF3D7_1016300.1:gene=PF3D7_1016300:organism=Plasmodium_falciparum_3D7:ge…
NVQNAQN	{'PF3D7_1472200.1-p1:transcript=PF3D7_1472200.1:gene=PF3D7_1472200:organism=Plasmodium_falciparum_3D7:gene_product=histone_deacetylase__putative:transcript_product=histone_deacetylase__putative:location=Pf3D7_14_v3:2945662-2952551(+):protein_length=2251:sequence_SO=chromosome:SO=protein_coding_seq29', 'PFIT_0727000.1-p1:transcript=PFIT_0727000.1:gene=PFIT_0727000:organism=Plasmodium_falciparum_IT…
KENVKED	{'PFIT_0713300.1-p1:transcript=PFIT_0713300.1:gene=PFIT_0713300:organism=Plasmodium_falciparum_IT:gene_product=conserved_Plasmodium_protein__unknown_function:transcript_product=conserved_Plasmodium_protein__unknown_function:location=PfIT_07_v3:662284-668904(-):protein_length=2206:sequence_SO=chromosome:SO=protein_coding_seq20', 'PF3D7_0715200.1-p1:transcript=PF3D7_0715200.1:gene=PF3D7_0715200:org…
EREKQEQ	{'PF3D7_1335400.1-p1:transcript=PF3D7_1335400.1:gene=PF3D7_1335400:organism=Plasmodium_falciparum_3D7:gene_product=reticulocyte_binding_protein_2_homologue_a:transcript_product=reticulocyte_binding_protein_2_homologue_a:location=Pf3D7_13_v3:1440779-1450385(+):protein_length=3130:sequence_SO=chromosome:SO=protein_coding_seq110', 'PF3D7_1335300.1-p1:transcript=PF3D7_1335300.1:gene=PF3D7_1335300:org…
NVLYQIL	{'PF3D7_1401000.1-p1:transcript=PF3D7_1401000.1:gene=PF3D7_1401000:organism=Plasmodium_falciparum_3D7:gene_product=glycophorin_binding_protein:transcript_product=glycophorin_binding_protein:location=Pf3D7_14_v3:34693-35773(-):protein_length=307:sequence_SO=chromosome:SO=protein_coding_seq11', 'PF3D7_1401000.1-p1:transcript=PF3D7_1401000.1:gene=PF3D7_1401000:organism=Plasmodium_falciparum_3D7:gene…
SNIIERK|SQIIERK	{'PF3D7_1231800.1-p1:transcript=PF3D7_1231800.1:gene=PF3D7_1231800:organism=Plasmodium_falciparum_3D7:gene_product=asparagine-rich_protein__putative:transcript_product=asparagine-rich_protein__putative:location=Pf3D7_12_v3:1314696-1320170(+):protein_length=1824:sequence_SO=chromosome:SO=protein_coding_seq5', 'PF3D7_1231800.1-p1:transcript=PF3D7_1231800.1:gene=PF3D7_1231800:organism=Plasmodium_fal…
DNNNKKK	{'PFIT_1008700.1-p1:transcript=PFIT_1008700.1:gene=PFIT_1008700:organism=Plasmodium_falciparum_IT:gene_product=small_subunit_rRNA_synthesis-associated_protein__putative:transcript_product=small_subunit_rRNA_synthesis-associated_protein__putative:location=PfIT_10_v3:312368-315118(+):protein_length=916:sequence_SO=chromosome:SO=protein_coding_seq12', 'PF3D7_0511500.1-p1:transcript=PF3D7_0511500.1:g…
DNIKNKG	{'PF3D7_1003400.1-p1:transcript=PF3D7_1003400.1:gene=PF3D7_1003400:organism=Plasmodium_falciparum_3D7:gene_product=conserved_Plasmodium_protein__unknown_function:transcript_product=conserved_Plasmodium_protein__unknown_function:location=Pf3D7_10_v3:152364-158516(-):protein_length=2050:sequence_SO=chromosome:SO=protein_coding_seq39', 'PF3D7_0405300.1-p1:transcript=PF3D7_0405300.1:gene=PF3D7_040530…
NMQNLQN	{'PF3D7_0322700.1-p1:transcript=PF3D7_0322700.1:gene=PF3D7_0322700:organism=Plasmodium_falciparum_3D7:gene_product=conserved_Plasmodium_protein__unknown_function:transcript_product=conserved_Plasmodium_protein__unknown_function:location=Pf3D7_03_v3:952964-962367(-):protein_length=3096:sequence_SO=chromosome:SO=protein_coding_seq106', 'PF3D7_0322700.1-p1:transcript=PF3D7_0322700.1:gene=PF3D7_03227…
EELKRQE	{'PF3D7_1335400.1-p1:transcript=PF3D7_1335400.1:gene=PF3D7_1335400:organism=Plasmodium_falciparum_3D7:gene_product=reticulocyte_binding_protein_2_homologue_a:transcript_product=reticulocyte_binding_protein_2_homologue_a:location=Pf3D7_13_v3:1440779-1450385(+):protein_length=3130:sequence_SO=chromosome:SO=protein_coding_seq110', 'PF3D7_1335400.1-p1:transcript=PF3D7_1335400.1:gene=PF3D7_1335400:org…
IINNNKK|ILNNNKK	{'PFIT_0812500.1-p1:transcript=PFIT_0812500.1:gene=PFIT_0812500:organism=Plasmodium_falciparum_IT:gene_product=peptidase_family_C50__putative:transcript_product=peptidase_family_C50__putative:location=PfIT_08_v3:522171-539597(-):protein_length=5808:sequence_SO=chromosome:SO=protein_coding_seq112', 'PF3D7_1430300.1-p1:transcript=PF3D7_1430300.1:gene=PF3D7_1430300:organism=Plasmodium_falciparum_3D7…
DALYTDE	{'PF3D7_1149200.1-p1:transcript=PF3D7_1149200.1:gene=PF3D7_1149200:organism=Plasmodium_falciparum_3D7:gene_product=ring-infected_erythrocyte_surface_antigen:transcript_product=ring-infected_erythrocyte_surface_antigen:location=Pf3D7_11_v3:1976407-1979804(+):protein_length=1090:sequence_SO=chromosome:SO=protein_coding_seq17', 'PF3D7_0102200.1-p1:transcript=PF3D7_0102200.1:gene=PF3D7_0102200:organi…
VNHSEKV	{'PF3D7_0220100.1-p1:transcript=PF3D7_0220100.1:gene=PF3D7_0220100:organism=Plasmodium_falciparum_3D7:gene_product=DnaJ_protein__putative:transcript_product=DnaJ_protein__putative:location=Pf3D7_02_v3:804520-807741(+):protein_length=997:sequence_SO=chromosome:SO=protein_coding_seq20', 'PF3D7_0220100.1-p1:transcript=PF3D7_0220100.1:gene=PF3D7_0220100:organism=Plasmodium_falciparum_3D7:gene_product…
KHEKNEK|KKEKNEK	{'PF3D7_1417200.1-p1:transcript=PF3D7_1417200.1:gene=PF3D7_1417200:organism=Plasmodium_falciparum_3D7:gene_product=NOT_family_protein__putative:transcript_product=NOT_family_protein__putative:location=Pf3D7_14_v3:694585-708177(+):protein_length=4466:sequence_SO=chromosome:SO=protein_coding_seq45', 'PF3D7_1417200.1-p1:transcript=PF3D7_1417200.1:gene=PF3D7_1417200:organism=Plasmodium_falciparum_3D7…
TSGPSGP	{'PF3D7_0930300.1-p1:transcript=PF3D7_0930300.1:gene=PF3D7_0930300:organism=Plasmodium_falciparum_3D7:gene_product=merozoite_surface_protein_1:transcript_product=merozoite_surface_protein_1:location=Pf3D7_09_v3:1201812-1206974(+):protein_length=1720:sequence_SO=chromosome:SO=protein_coding_seq3', 'Plasmodiumfalciparum_AMA1_[K1_allele]_full-length_seq2', 'PF3D7_0930300.1-p1:transcript=PF3D7_093030…
KGNENKI	{'PF11_0008_D2_seq1', 'PF3D7_1100200.1-p1:transcript=PF3D7_1100200.1:gene=PF3D7_1100200:organism=Plasmodium_falciparum_3D7:gene_product=erythrocyte_membrane_protein_1__PfEMP1:transcript_product=erythrocyte_membrane_protein_1__PfEMP1:location=Pf3D7_11_v3:32666-42386(-):protein_length=2994:sequence_SO=chromosome:SO=protein_coding_seq5', 'DD2var32_seq4', 'PF11_0008_D2_seq2', 'PF3D7_1100200.1-p1:tran…
LFDLEKQ	{'PF3D7_1149200.1-p1:transcript=PF3D7_1149200.1:gene=PF3D7_1149200:organism=Plasmodium_falciparum_3D7:gene_product=ring-infected_erythrocyte_surface_antigen:transcript_product=ring-infected_erythrocyte_surface_antigen:location=Pf3D7_11_v3:1976407-1979804(+):protein_length=1090:sequence_SO=chromosome:SO=protein_coding_seq17', 'PF3D7_0102200.1-p1:transcript=PF3D7_0102200.1:gene=PF3D7_0102200:organi…
MSGENIM	{'PF3D7_1342900.1-p1:transcript=PF3D7_1342900.1:gene=PF3D7_1342900:organism=Plasmodium_falciparum_3D7:gene_product=AP2_domain_transcription_factor__putative:transcript_product=AP2_domain_transcription_factor__putative:location=Pf3D7_13_v3:1682393-1693969(-):protein_length=3858:sequence_SO=chromosome:SO=protein_coding_seq27', 'PFIT_1342100.1-p1:transcript=PFIT_1342100.1:gene=PFIT_1342100:organism=…
DNIKSKN	{'PF3D7_0704300.1-p1:transcript=PF3D7_0704300.1:gene=PF3D7_0704300:organism=Plasmodium_falciparum_3D7:gene_product=conserved_Plasmodium_membrane_protein__unknown_function:transcript_product=conserved_Plasmodium_membrane_protein__unknown_function:location=Pf3D7_07_v3:197691-203249(+):protein_length=1852:sequence_SO=chromosome:SO=protein_coding_seq25', 'PFIT_1125750.1-p1:transcript=PFIT_1125750.1:g…
NGNNLNN	{'PF3D7_1355600.1-p1:transcript=PF3D7_1355600.1:gene=PF3D7_1355600:organism=Plasmodium_falciparum_3D7:gene_product=conserved_Plasmodium_protein__unknown_function:transcript_product=conserved_Plasmodium_protein__unknown_function:location=Pf3D7_13_v3:2202611-2204481(-):protein_length=562:sequence_SO=chromosome:SO=protein_coding_seq7', 'PF3D7_0525200.1-p1:transcript=PF3D7_0525200.1:gene=PF3D7_052520…
IIEEDIK	{'PF3D7_0715200.1-p1:transcript=PF3D7_0715200.1:gene=PF3D7_0715200:organism=Plasmodium_falciparum_3D7:gene_product=conserved_Plasmodium_protein__unknown_function:transcript_product=conserved_Plasmodium_protein__unknown_function:location=Pf3D7_07_v3:676061-682681(-):protein_length=2206:sequence_SO=chromosome:SO=protein_coding_seq19', 'PF3D7_0715200.1-p1:transcript=PF3D7_0715200.1:gene=PF3D7_071520…
EEELRKK	{'PF3D7_1335300.1-p1:transcript=PF3D7_1335300.1:gene=PF3D7_1335300:organism=Plasmodium_falciparum_3D7:gene_product=reticulocyte_binding_protein_2_homologue_b:transcript_product=reticulocyte_binding_protein_2_homologue_b:location=Pf3D7_13_v3:1428874-1438852(-):protein_length=3254:sequence_SO=chromosome:SO=protein_coding_seq111', 'PF3D7_1335300.1-p1:transcript=PF3D7_1335300.1:gene=PF3D7_1335300:org…
NTKNIEN|NTKNIEQ	{'PF3D7_1120600.1-p1:transcript=PF3D7_1120600.1:gene=PF3D7_1120600:organism=Plasmodium_falciparum_3D7:gene_product=conserved_Plasmodium_protein__unknown_function:transcript_product=conserved_Plasmodium_protein__unknown_function:location=Pf3D7_11_v3:775233-783639(-):protein_length=2545:sequence_SO=chromosome:SO=protein_coding_seq82', 'PF3D7_1123100.1-p1:transcript=PF3D7_1123100.1:gene=PF3D7_112310…
PEYRKHL|PEYRKHV	{'PF3D7_1016300.1-p1:transcript=PF3D7_1016300.1:gene=PF3D7_1016300:organism=Plasmodium_falciparum_3D7:gene_product=glycophorin_binding_protein:transcript_product=glycophorin_binding_protein:location=Pf3D7_10_v3:650898-653567(-):protein_length=824:sequence_SO=chromosome:SO=protein_coding_seq31', 'PF3D7_1016300.1-p1:transcript=PF3D7_1016300.1:gene=PF3D7_1016300:organism=Plasmodium_falciparum_3D7:ge…
KKKEEDL	{'PF3D7_0620400.1-p1:transcript=PF3D7_0620400.1:gene=PF3D7_0620400:organism=Plasmodium_falciparum_3D7:gene_product=merozoite_surface_protein_10:transcript_product=merozoite_surface_protein_10:location=Pf3D7_06_v3:851378-852955(-):protein_length=525:sequence_SO=chromosome:SO=protein_coding_seq9', 'PF3D7_1311100.1-p1:transcript=PF3D7_1311100.1:gene=PF3D7_1311100:organism=Plasmodium_falciparum_3D7:g…
KEKNESI	{"PF3D7_0114100.1-p1:transcript=PF3D7_0114100.1:gene=PF3D7_0114100:organism=Plasmodium_falciparum_3D7:gene_product=Pfmc-2TM_Maurer's_cleft_two_transmembrane_protein:transcript_product=Pfmc-2TM_Maurer's_cleft_two_transmembrane_protein:location=Pf3D7_01_v3:547597-548380(-):protein_length=229:sequence_SO=chromosome:SO=protein_coding_seq4", "PF3D7_0222100.1-p1:transcript=PF3D7_0222100.1:gene=PF3D7_02…
KEEELRK	{'PF3D7_1335400.1-p1:transcript=PF3D7_1335400.1:gene=PF3D7_1335400:organism=Plasmodium_falciparum_3D7:gene_product=reticulocyte_binding_protein_2_homologue_a:transcript_product=reticulocyte_binding_protein_2_homologue_a:location=Pf3D7_13_v3:1440779-1450385(+):protein_length=3130:sequence_SO=chromosome:SO=protein_coding_seq109', 'PF3D7_1335300.1-p1:transcript=PF3D7_1335300.1:gene=PF3D7_1335300:org…
NVDEDNN	{'PF3D7_0803100.1-p1:transcript=PF3D7_0803100.1:gene=PF3D7_0803100:organism=Plasmodium_falciparum_3D7:gene_product=U3_small_nucleolar_RNA-associated_protein_14__putative:transcript_product=U3_small_nucleolar_RNA-associated_protein_14__putative:location=Pf3D7_08_v3:199181-202918(-):protein_length=1245:sequence_SO=chromosome:SO=protein_coding_seq32', 'PF3D7_0803100.1-p1:transcript=PF3D7_0803100.1:g…
AFGGGLP	{'IT4var31_seq65', 'PFIT_bin09600.1-p1:transcript=PFIT_bin09600.1:gene=PFIT_bin09600:organism=Plasmodium_falciparum_IT:gene_product=B_ITvar19_-_erythrocyte_membrane_protein_1__PfEMP1__putative:transcript_product=B_ITvar19_-_erythrocyte_membrane_protein_1__PfEMP1__putative:location=PfIT_bin_v3_archived_contig_27:17-4166(+):protein_length=1177:sequence_SO=random_sequence:SO=protein_coding_seq40', '…
EKAKQEE	{'PF3D7_1335300.1-p1:transcript=PF3D7_1335300.1:gene=PF3D7_1335300:organism=Plasmodium_falciparum_3D7:gene_product=reticulocyte_binding_protein_2_homologue_b:transcript_product=reticulocyte_binding_protein_2_homologue_b:location=Pf3D7_13_v3:1428874-1438852(-):protein_length=3254:sequence_SO=chromosome:SO=protein_coding_seq108', 'PF3D7_1335400.1-p1:transcript=PF3D7_1335400.1:gene=PF3D7_1335400:org…
ENTNENI|ENTNENV	{'PF3D7_0722800.1-p1:transcript=PF3D7_0722800.1:gene=PF3D7_0722800:organism=Plasmodium_falciparum_3D7:gene_product=conserved_Plasmodium_protein__unknown_function:transcript_product=conserved_Plasmodium_protein__unknown_function:location=Pf3D7_07_v3:963370-965109(+):protein_length=579:sequence_SO=chromosome:SO=protein_coding_seq7', 'PF3D7_1410300.1-p1:transcript=PF3D7_1410300.1:gene=PF3D7_1410300:…
NNNKKNN	{'PF3D7_1324300.1-p1:transcript=PF3D7_1324300.1:gene=PF3D7_1324300:organism=Plasmodium_falciparum_3D7:gene_product=conserved_Plasmodium_membrane_protein__unknown_function:transcript_product=conserved_Plasmodium_membrane_protein__unknown_function:location=Pf3D7_13_v3:1002748-1019303(-):protein_length=5415:sequence_SO=chromosome:SO=protein_coding_seq74', 'PF3D7_0809800.1-p1:transcript=PF3D7_0809800…
KNEKNEK	{'PF3D7_0721000.1-p1:transcript=PF3D7_0721000.1:gene=PF3D7_0721000:organism=Plasmodium_falciparum_3D7:gene_product=conserved_Plasmodium_membrane_protein__unknown_function:transcript_product=conserved_Plasmodium_membrane_protein__unknown_function:location=Pf3D7_07_v3:904143-914671(+):protein_length=3459:sequence_SO=chromosome:SO=protein_coding_seq112', 'PFIT_0405500.1-p1:transcript=PFIT_0405500.1:…
NELLSHN	{'PF3D7_1335400.1-p1:transcript=PF3D7_1335400.1:gene=PF3D7_1335400:organism=Plasmodium_falciparum_3D7:gene_product=reticulocyte_binding_protein_2_homologue_a:transcript_product=reticulocyte_binding_protein_2_homologue_a:location=Pf3D7_13_v3:1440779-1450385(+):protein_length=3130:sequence_SO=chromosome:SO=protein_coding_seq106', 'PF3D7_1335300.1-p1:transcript=PF3D7_1335300.1:gene=PF3D7_1335300:org…
KKKKNLD	{"PF3D7_0222100.1-p1:transcript=PF3D7_0222100.1:gene=PF3D7_0222100:organism=Plasmodium_falciparum_3D7:gene_product=Pfmc-2TM_Maurer's_cleft_two_transmembrane_protein:transcript_product=Pfmc-2TM_Maurer's_cleft_two_transmembrane_protein:location=Pf3D7_02_v3:878468-879251(-):protein_length=229:sequence_SO=chromosome:SO=protein_coding_seq3", 'PF3D7_0710800.1-p1:transcript=PF3D7_0710800.1:gene=PF3D7_07…
KNKNNKN|KNKNNKQ	{'PF3D7_1456500.1-p1:transcript=PF3D7_1456500.1:gene=PF3D7_1456500:organism=Plasmodium_falciparum_3D7:gene_product=conserved_Plasmodium_protein__unknown_function:transcript_product=conserved_Plasmodium_protein__unknown_function:location=Pf3D7_14_v3:2314380-2321555(+):protein_length=2391:sequence_SO=chromosome:SO=protein_coding_seq57', 'PF3D7_1222600.1-p1:transcript=PF3D7_1222600.1:gene=PF3D7_1222…
PEGQIMK|PEGQIMR	{'PF3D7_1016300.1-p1:transcript=PF3D7_1016300.1:gene=PF3D7_1016300:organism=Plasmodium_falciparum_3D7:gene_product=glycophorin_binding_protein:transcript_product=glycophorin_binding_protein:location=Pf3D7_10_v3:650898-653567(-):protein_length=824:sequence_SO=chromosome:SO=protein_coding_seq31', 'PF3D7_1016300.1-p1:transcript=PF3D7_1016300.1:gene=PF3D7_1016300:organism=Plasmodium_falciparum_3D7:ge…
PEGQIMK	{'PF3D7_1401000.1-p1:transcript=PF3D7_1401000.1:gene=PF3D7_1401000:organism=Plasmodium_falciparum_3D7:gene_product=glycophorin_binding_protein:transcript_product=glycophorin_binding_protein:location=Pf3D7_14_v3:34693-35773(-):protein_length=307:sequence_SO=chromosome:SO=protein_coding_seq11', 'PF3D7_1401000.1-p1:transcript=PF3D7_1401000.1:gene=PF3D7_1401000:organism=Plasmodium_falciparum_3D7:gene…
ENYYSDS	{'PF3D7_0723400.1-p1:transcript=PF3D7_0723400.1:gene=PF3D7_0723400:organism=Plasmodium_falciparum_3D7:gene_product=conserved_Plasmodium_protein__unknown_function:transcript_product=conserved_Plasmodium_protein__unknown_function:location=Pf3D7_07_v3:978920-983188(-):protein_length=1422:sequence_SO=chromosome:SO=protein_coding_seq9', 'PF3D7_1452000.1-p1:transcript=PF3D7_1452000.1:gene=PF3D7_1452000…
DDNKKCD	{'PFIT_0102100.1-p1:transcript=PFIT_0102100.1:gene=PFIT_0102100:organism=Plasmodium_falciparum_IT:gene_product=ATP-dependent_RNA_helicase__putative:transcript_product=ATP-dependent_RNA_helicase__putative:location=PfIT_01_v3:103331-108500(+):protein_length=1561:sequence_SO=chromosome:SO=protein_coding_seq29', 'PF3D7_1362900.1-p1:transcript=PF3D7_1362900.1:gene=PF3D7_1362900:organism=Plasmodium_fal…
NVQNVQN	{'PFIT_0914100.1-p1:transcript=PFIT_0914100.1:gene=PFIT_0914100:organism=Plasmodium_falciparum_IT:gene_product=pseudouridylate_synthase__putative:transcript_product=pseudouridylate_synthase__putative:location=PfIT_09_v3:579330-582215(+):protein_length=961:sequence_SO=chromosome:SO=protein_coding_seq18', 'PF3D7_0903300.1-p1:transcript=PF3D7_0903300.1:gene=PF3D7_0903300:organism=Plasmodium_falcipar…
HSEKLNH	{'PF3D7_0220100.1-p1:transcript=PF3D7_0220100.1:gene=PF3D7_0220100:organism=Plasmodium_falciparum_3D7:gene_product=DnaJ_protein__putative:transcript_product=DnaJ_protein__putative:location=Pf3D7_02_v3:804520-807741(+):protein_length=997:sequence_SO=chromosome:SO=protein_coding_seq20', 'PF3D7_0220100.1-p1:transcript=PF3D7_0220100.1:gene=PF3D7_0220100:organism=Plasmodium_falciparum_3D7:gene_product…
DDIKNDD|DDIRNDD	{'PF3D7_0629700.1-p1:transcript=PF3D7_0629700.1:gene=PF3D7_0629700:organism=Plasmodium_falciparum_3D7:gene_product=SET_domain_protein__putative:transcript_product=SET_domain_protein__putative:location=Pf3D7_06_v3:1221941-1242922(+):protein_length=6753:sequence_SO=chromosome:SO=protein_coding_seq63', 'PF3D7_1359700.1-p1:transcript=PF3D7_1359700.1:gene=PF3D7_1359700:organism=Plasmodium_falciparum_3…
SGPSGPS	{'Plasmodiumfalciparum_AMA1_[K1_allele]_full-length_seq3', 'Plasmodiumfalciparum_AMA1_[K1_allele]_full-length_seq2', 'Plasmodiumfalciparum_AMA1_[K1_allele]_full-length_seq4', 'PF3D7_0930300.1-p1:transcript=PF3D7_0930300.1:gene=PF3D7_0930300:organism=Plasmodium_falciparum_3D7:gene_product=merozoite_surface_protein_1:transcript_product=merozoite_surface_protein_1:location=Pf3D7_09_v3:1201812-120697…
DIKDLGD	{'PF3D7_1335400.1-p1:transcript=PF3D7_1335400.1:gene=PF3D7_1335400:organism=Plasmodium_falciparum_3D7:gene_product=reticulocyte_binding_protein_2_homologue_a:transcript_product=reticulocyte_binding_protein_2_homologue_a:location=Pf3D7_13_v3:1440779-1450385(+):protein_length=3130:sequence_SO=chromosome:SO=protein_coding_seq106', 'PF3D7_1335300.1-p1:transcript=PF3D7_1335300.1:gene=PF3D7_1335300:org…
EEIEKQI|EEIEKQV	{'PF3D7_0500800.1-p1:transcript=PF3D7_0500800.1:gene=PF3D7_0500800:organism=Plasmodium_falciparum_3D7:gene_product=mature_parasite-infected_erythrocyte_surface_antigen:transcript_product=mature_parasite-infected_erythrocyte_surface_antigen:location=Pf3D7_05_v3:43327-47761(-):protein_length=1434:sequence_SO=chromosome:SO=protein_coding_seq32', 'PF3D7_1442600.1-p1:transcript=PF3D7_1442600.1:gene=PF…
ERIEKEK	{'PF3D7_1335300.1-p1:transcript=PF3D7_1335300.1:gene=PF3D7_1335300:organism=Plasmodium_falciparum_3D7:gene_product=reticulocyte_binding_protein_2_homologue_b:transcript_product=reticulocyte_binding_protein_2_homologue_b:location=Pf3D7_13_v3:1428874-1438852(-):protein_length=3254:sequence_SO=chromosome:SO=protein_coding_seq108', 'PF3D7_1335400.1-p1:transcript=PF3D7_1335400.1:gene=PF3D7_1335400:org…
NDMKKNK	{'PFIT_1228500.1-p1:transcript=PFIT_1228500.1:gene=PFIT_1228500:organism=Plasmodium_falciparum_IT:gene_product=conserved_Plasmodium_protein__unknown_function:transcript_product=conserved_Plasmodium_protein__unknown_function:location=PfIT_12_v3:1121130-1130633(-):protein_length=3167:sequence_SO=chromosome:SO=protein_coding_seq78', 'PFIT_1228500.1-p1:transcript=PFIT_1228500.1:gene=PFIT_1228500:orga…
EKQEQLK	{'PF3D7_1335300.1-p1:transcript=PF3D7_1335300.1:gene=PF3D7_1335300:organism=Plasmodium_falciparum_3D7:gene_product=reticulocyte_binding_protein_2_homologue_b:transcript_product=reticulocyte_binding_protein_2_homologue_b:location=Pf3D7_13_v3:1428874-1438852(-):protein_length=3254:sequence_SO=chromosome:SO=protein_coding_seq108', 'PF3D7_1335400.1-p1:transcript=PF3D7_1335400.1:gene=PF3D7_1335400:org…
QKYMDML	{'PF3D7_1149200.1-p1:transcript=PF3D7_1149200.1:gene=PF3D7_1149200:organism=Plasmodium_falciparum_3D7:gene_product=ring-infected_erythrocyte_surface_antigen:transcript_product=ring-infected_erythrocyte_surface_antigen:location=Pf3D7_11_v3:1976407-1979804(+):protein_length=1090:sequence_SO=chromosome:SO=protein_coding_seq17', 'PF3D7_0102200.1-p1:transcript=PF3D7_0102200.1:gene=PF3D7_0102200:organi…
KDEKEKI|KEEKEKI	{'PF3D7_0405300.1-p1:transcript=PF3D7_0405300.1:gene=PF3D7_0405300:organism=Plasmodium_falciparum_3D7:gene_product=liver_specific_protein_2__putative:transcript_product=liver_specific_protein_2__putative:location=Pf3D7_04_v3:282403-288297(-):protein_length=1964:sequence_SO=chromosome:SO=protein_coding_seq25', 'PF3D7_0223500.1-p1:transcript=PF3D7_0223500.1:gene=PF3D7_0223500:organism=Plasmodium_fa…
KITNSKK|KLTNSKK	{'PFIT_1240500.1-p1:transcript=PFIT_1240500.1:gene=PFIT_1240500:organism=Plasmodium_falciparum_IT:gene_product=erythrocyte_membrane_protein_1__PfEMP1:transcript_product=erythrocyte_membrane_protein_1__PfEMP1:location=PfIT_12_v3:1670057-1678296(+):protein_length=2429:sequence_SO=chromosome:SO=protein_coding_seq34', 'HB3var22_seq66', 'PFIT_1240500.1-p1:transcript=PFIT_1240500.1:gene=PFIT_1240500:or…
DNIDKND|DNIEKND	{'PFIT_1036200.1-p1:transcript=PFIT_1036200.1:gene=PFIT_1036200:organism=Plasmodium_falciparum_IT:gene_product=DNA_polymerase_zeta_catalytic_subunit__putative:transcript_product=DNA_polymerase_zeta_catalytic_subunit__putative:location=PfIT_10_v3:1393016-1400289(+):protein_length=2245:sequence_SO=chromosome:SO=protein_coding_seq76', 'PF3D7_1312700.1-p1:transcript=PF3D7_1312700.1:gene=PF3D7_1312700…
NNNKKEI	{'PF3D7_1324300.1-p1:transcript=PF3D7_1324300.1:gene=PF3D7_1324300:organism=Plasmodium_falciparum_3D7:gene_product=conserved_Plasmodium_membrane_protein__unknown_function:transcript_product=conserved_Plasmodium_membrane_protein__unknown_function:location=Pf3D7_13_v3:1002748-1019303(-):protein_length=5415:sequence_SO=chromosome:SO=protein_coding_seq73', 'PF3D7_1324300.1-p1:transcript=PF3D7_1324300…
IKKDDIK	{'PF3D7_0310200.1-p1:transcript=PF3D7_0310200.1:gene=PF3D7_0310200:organism=Plasmodium_falciparum_3D7:gene_product=phd_finger_protein__putative:transcript_product=phd_finger_protein__putative:location=Pf3D7_03_v3:427290-440942(+):protein_length=4550:sequence_SO=chromosome:SO=protein_coding_seq159', 'PF3D7_0310200.1-p1:transcript=PF3D7_0310200.1:gene=PF3D7_0310200:organism=Plasmodium_falciparum_3D…
DSKINVD|DSKINVE	{'PF3D7_1200900.1-p1:transcript=PF3D7_1200900.1:gene=PF3D7_1200900:organism=Plasmodium_falciparum_3D7:gene_product=Plasmodium_exported_protein_(PHISTc)__unknown_function:transcript_product=Plasmodium_exported_protein_(PHISTc)__unknown_function:location=Pf3D7_12_v3:73229-74522(-):protein_length=383:sequence_SO=chromosome:SO=protein_coding_seq8', 'PF3D7_1200900.1-p1:transcript=PF3D7_1200900.1:gene=…
NDEVKNN	{'PF3D7_1017600.1-p1:transcript=PF3D7_1017600.1:gene=PF3D7_1017600:organism=Plasmodium_falciparum_3D7:gene_product=conserved_Plasmodium_protein__unknown_function:transcript_product=conserved_Plasmodium_protein__unknown_function:location=Pf3D7_10_v3:705537-708452(+):protein_length=971:sequence_SO=chromosome:SO=protein_coding_seq27', 'PF3D7_1337400.1-p1:transcript=PF3D7_1337400.1:gene=PF3D7_1337400…
KEKNKLK	{'PF3D7_1107300.1-p1:transcript=PF3D7_1107300.1:gene=PF3D7_1107300:organism=Plasmodium_falciparum_3D7:gene_product=polyadenylate-binding_protein-interacting_protein_1__putative:transcript_product=polyadenylate-binding_protein-interacting_protein_1__putative:location=Pf3D7_11_v3:301283-311287(-):protein_length=3334:sequence_SO=chromosome:SO=protein_coding_seq63', 'PF3D7_1107300.1-p1:transcript=PF3…
NNNNSKD	{'PF3D7_1112600.1-p1:transcript=PF3D7_1112600.1:gene=PF3D7_1112600:organism=Plasmodium_falciparum_3D7:gene_product=DNA_helicase__putative:transcript_product=DNA_helicase__putative:location=Pf3D7_11_v3:478823-480946(-):protein_length=707:sequence_SO=chromosome:SO=protein_coding_seq18', 'PF3D7_1443100.1-p1:transcript=PF3D7_1443100.1:gene=PF3D7_1443100:organism=Plasmodium_falciparum_3D7:gene_product…
LKRQEQE	{'PF3D7_1335400.1-p1:transcript=PF3D7_1335400.1:gene=PF3D7_1335400:organism=Plasmodium_falciparum_3D7:gene_product=reticulocyte_binding_protein_2_homologue_a:transcript_product=reticulocyte_binding_protein_2_homologue_a:location=Pf3D7_13_v3:1440779-1450385(+):protein_length=3130:sequence_SO=chromosome:SO=protein_coding_seq110', 'PF3D7_1335400.1-p1:transcript=PF3D7_1335400.1:gene=PF3D7_1335400:org…
NNQLNNN	{'PF3D7_1134600.1-p1:transcript=PF3D7_1134600.1:gene=PF3D7_1134600:organism=Plasmodium_falciparum_3D7:gene_product=zinc_finger_protein__putative:transcript_product=zinc_finger_protein__putative:location=Pf3D7_11_v3:1350621-1355789(-):protein_length=1722:sequence_SO=chromosome:SO=protein_coding_seq41', 'PFIT_1021400.1-p1:transcript=PFIT_1021400.1:gene=PFIT_1021400:organism=Plasmodium_falciparum_IT…
NNENNEN	{'PFIT_1237200.1-p1:transcript=PFIT_1237200.1:gene=PFIT_1237200:organism=Plasmodium_falciparum_IT:gene_product=conserved_Plasmodium_protein__unknown_function:transcript_product=conserved_Plasmodium_protein__unknown_function:location=PfIT_12_v3:1510268-1515331(-):protein_length=1687:sequence_SO=chromosome:SO=protein_coding_seq36', 'PFIT_1434600.1-p1:transcript=PFIT_1434600.1:gene=PFIT_1434600:orga…
YPRHPGL	{'PFIT_1478600.1-p1:transcript=PFIT_1478600.1:gene=PFIT_1478600:organism=Plasmodium_falciparum_IT:gene_product=Plasmodium_exported_protein_(PHISTb)__unknown_function:transcript_product=Plasmodium_exported_protein_(PHISTb)__unknown_function:location=PfIT_14_v3:3210330-3211978(+):protein_length=494:sequence_SO=chromosome:SO=protein_coding_seq16', 'PF3D7_1477500.1-p1:transcript=PF3D7_1477500.1:gene=…
SSRSNTL	{'Plasmodiumfalciparum_AMA1_[K1_allele]_full-length_seq4', 'PF3D7_0930300.1-p1:transcript=PF3D7_0930300.1:gene=PF3D7_0930300:organism=Plasmodium_falciparum_3D7:gene_product=merozoite_surface_protein_1:transcript_product=merozoite_surface_protein_1:location=Pf3D7_09_v3:1201812-1206974(+):protein_length=1720:sequence_SO=chromosome:SO=protein_coding_seq5', 'PF3D7_0930300.1-p1:transcript=PF3D7_093030…
TDNNNNT	{'PF3D7_0702300.1-p1:transcript=PF3D7_0702300.1:gene=PF3D7_0702300:organism=Plasmodium_falciparum_3D7:gene_product=sporozoite_threonine_and_asparagine-rich_protein:transcript_product=sporozoite_threonine_and_asparagine-rich_protein:location=Pf3D7_07_v3:96761-98730(+):protein_length=594:sequence_SO=chromosome:SO=protein_coding_seq16', 'PFIT_bin01300.1-p1:transcript=PFIT_bin01300.1:gene=PFIT_bin013…
SEDKDDK|SEDKEDK	{'PF3D7_0918700.1-p1:transcript=PF3D7_0918700.1:gene=PF3D7_0918700:organism=Plasmodium_falciparum_3D7:gene_product=conserved_Plasmodium_protein__unknown_function:transcript_product=conserved_Plasmodium_protein__unknown_function:location=Pf3D7_09_v3:769452-772105(+):protein_length=737:sequence_SO=chromosome:SO=protein_coding_seq14', 'PF3D7_0114000.1-p1:transcript=PF3D7_0114000.1:gene=PF3D7_0114000…
KILNNKI|KIVNNKI	{'PF3D7_0723800.1-p1:transcript=PF3D7_0723800.1:gene=PF3D7_0723800:organism=Plasmodium_falciparum_3D7:gene_product=conserved_Plasmodium_protein__unknown_function:transcript_product=conserved_Plasmodium_protein__unknown_function:location=Pf3D7_07_v3:993232-1000233(+):protein_length=2190:sequence_SO=chromosome:SO=protein_coding_seq29', 'PF3D7_0723800.1-p1:transcript=PF3D7_0723800.1:gene=PF3D7_07238…
LRKKEQE	{'PF3D7_1335300.1-p1:transcript=PF3D7_1335300.1:gene=PF3D7_1335300:organism=Plasmodium_falciparum_3D7:gene_product=reticulocyte_binding_protein_2_homologue_b:transcript_product=reticulocyte_binding_protein_2_homologue_b:location=Pf3D7_13_v3:1428874-1438852(-):protein_length=3254:sequence_SO=chromosome:SO=protein_coding_seq111', 'PF3D7_1335300.1-p1:transcript=PF3D7_1335300.1:gene=PF3D7_1335300:org…
EVIIEEV	{'PF3D7_1038400.1-p1:transcript=PF3D7_1038400.1:gene=PF3D7_1038400:organism=Plasmodium_falciparum_3D7:gene_product=gametocyte-specific_protein:transcript_product=gametocyte-specific_protein:location=Pf3D7_10_v3:1519021-1547825(+):protein_length=9563:sequence_SO=chromosome:SO=protein_coding_seq183', 'PF3D7_1038400.1-p1:transcript=PF3D7_1038400.1:gene=PF3D7_1038400:organism=Plasmodium_falciparum_3D…
DPEYRKH	{'PF3D7_1016300.1-p1:transcript=PF3D7_1016300.1:gene=PF3D7_1016300:organism=Plasmodium_falciparum_3D7:gene_product=glycophorin_binding_protein:transcript_product=glycophorin_binding_protein:location=Pf3D7_10_v3:650898-653567(-):protein_length=824:sequence_SO=chromosome:SO=protein_coding_seq31', 'PF3D7_1016300.1-p1:transcript=PF3D7_1016300.1:gene=PF3D7_1016300:organism=Plasmodium_falciparum_3D7:ge…
GSAFGGG	{'DD2var25_seq139', 'IT4var31_seq65', 'IT4var31_seq64', 'PFIT_bin09600.1-p1:transcript=PFIT_bin09600.1:gene=PFIT_bin09600:organism=Plasmodium_falciparum_IT:gene_product=B_ITvar19_-_erythrocyte_membrane_protein_1__PfEMP1__putative:transcript_product=B_ITvar19_-_erythrocyte_membrane_protein_1__PfEMP1__putative:location=PfIT_bin_v3_archived_contig_27:17-4166(+):protein_length=1177:sequence_SO=random…
KLNKEAI|KLNKEGI	{'PF3D7_0402600.1-p1:transcript=PF3D7_0402600.1:gene=PF3D7_0402600:organism=Plasmodium_falciparum_3D7:gene_product=stevor:transcript_product=stevor:location=Pf3D7_04_v3:159279-160314(-):protein_length=301:sequence_SO=chromosome:SO=protein_coding_seq3', 'PFIT_0800600.1-p1:transcript=PFIT_0800600.1:gene=PFIT_0800600:organism=Plasmodium_falciparum_IT:gene_product=stevor:transcript_product=stevor:loc…
PSSRSNT	{'Plasmodiumfalciparum_AMA1_[K1_allele]_full-length_seq4', 'PF3D7_0930300.1-p1:transcript=PF3D7_0930300.1:gene=PF3D7_0930300:organism=Plasmodium_falciparum_3D7:gene_product=merozoite_surface_protein_1:transcript_product=merozoite_surface_protein_1:location=Pf3D7_09_v3:1201812-1206974(+):protein_length=1720:sequence_SO=chromosome:SO=protein_coding_seq5', 'PF3D7_0930300.1-p1:transcript=PF3D7_093030…
QEQERLQ	{'PF3D7_1335400.1-p1:transcript=PF3D7_1335400.1:gene=PF3D7_1335400:organism=Plasmodium_falciparum_3D7:gene_product=reticulocyte_binding_protein_2_homologue_a:transcript_product=reticulocyte_binding_protein_2_homologue_a:location=Pf3D7_13_v3:1440779-1450385(+):protein_length=3130:sequence_SO=chromosome:SO=protein_coding_seq110', 'PF3D7_1335400.1-p1:transcript=PF3D7_1335400.1:gene=PF3D7_1335400:org…
KDNNINS|RDNNINS	{'PF3D7_0103600.1-p1:transcript=PF3D7_0103600.1:gene=PF3D7_0103600:organism=Plasmodium_falciparum_3D7:gene_product=ATP-dependent_RNA_helicase__putative:transcript_product=ATP-dependent_RNA_helicase__putative:location=Pf3D7_01_v3:161131-166229(+):protein_length=1534:sequence_SO=chromosome:SO=protein_coding_seq28', 'PFIT_0102100.1-p1:transcript=PFIT_0102100.1:gene=PFIT_0102100:organism=Plasmodium_f…
ELKRQEQ	{'PF3D7_1335400.1-p1:transcript=PF3D7_1335400.1:gene=PF3D7_1335400:organism=Plasmodium_falciparum_3D7:gene_product=reticulocyte_binding_protein_2_homologue_a:transcript_product=reticulocyte_binding_protein_2_homologue_a:location=Pf3D7_13_v3:1440779-1450385(+):protein_length=3130:sequence_SO=chromosome:SO=protein_coding_seq110', 'PF3D7_1335400.1-p1:transcript=PF3D7_1335400.1:gene=PF3D7_1335400:org…
SKSSGSS|SRSSGSS	{'PF3D7_1033200.1-p1:transcript=PF3D7_1033200.1:gene=PF3D7_1033200:organism=Plasmodium_falciparum_3D7:gene_product=early_transcribed_membrane_protein_10.2:transcript_product=early_transcribed_membrane_protein_10.2:location=Pf3D7_10_v3:1335222-1336289(+):protein_length=355:sequence_SO=chromosome:SO=protein_coding_seq12', 'PF3D7_0714600.1-p1:transcript=PF3D7_0714600.1:gene=PF3D7_0714600:organism=Pl…
DVKKVIK|EVKKVIK	{'PF3D7_0500800.1-p1:transcript=PF3D7_0500800.1:gene=PF3D7_0500800:organism=Plasmodium_falciparum_3D7:gene_product=mature_parasite-infected_erythrocyte_surface_antigen:transcript_product=mature_parasite-infected_erythrocyte_surface_antigen:location=Pf3D7_05_v3:43327-47761(-):protein_length=1434:sequence_SO=chromosome:SO=protein_coding_seq32', 'HB3var20_seq62', 'HB3var20_seq64', 'PF3D7_0500800.1-p…
KYMDMLD	{'PF3D7_1149200.1-p1:transcript=PF3D7_1149200.1:gene=PF3D7_1149200:organism=Plasmodium_falciparum_3D7:gene_product=ring-infected_erythrocyte_surface_antigen:transcript_product=ring-infected_erythrocyte_surface_antigen:location=Pf3D7_11_v3:1976407-1979804(+):protein_length=1090:sequence_SO=chromosome:SO=protein_coding_seq17', 'PF3D7_0102200.1-p1:transcript=PF3D7_0102200.1:gene=PF3D7_0102200:organi…
NNDKKNN	{'PF3D7_0511500.1-p1:transcript=PF3D7_0511500.1:gene=PF3D7_0511500:organism=Plasmodium_falciparum_3D7:gene_product=RNA_pseudouridylate_synthase__putative:transcript_product=RNA_pseudouridylate_synthase__putative:location=Pf3D7_05_v3:486602-516787(+):protein_length=10061:sequence_SO=chromosome:SO=protein_coding_seq45', 'PFIT_1136300.1-p1:transcript=PFIT_1136300.1:gene=PFIT_1136300:organism=Plasmod…
GNMQNLQ	{'PF3D7_0322700.1-p1:transcript=PF3D7_0322700.1:gene=PF3D7_0322700:organism=Plasmodium_falciparum_3D7:gene_product=conserved_Plasmodium_protein__unknown_function:transcript_product=conserved_Plasmodium_protein__unknown_function:location=Pf3D7_03_v3:952964-962367(-):protein_length=3096:sequence_SO=chromosome:SO=protein_coding_seq106', 'PF3D7_0322700.1-p1:transcript=PF3D7_0322700.1:gene=PF3D7_03227…
MILNEEE|MVLNEEE	{'PF3D7_0930300.1-p1:transcript=PF3D7_0930300.1:gene=PF3D7_0930300:organism=Plasmodium_falciparum_3D7:gene_product=merozoite_surface_protein_1:transcript_product=merozoite_surface_protein_1:location=Pf3D7_09_v3:1201812-1206974(+):protein_length=1720:sequence_SO=chromosome:SO=protein_coding_seq3', 'Plasmodiumfalciparum_AMA1_[K1_allele]_full-length_seq2', 'PF3D7_0930300.1-p1:transcript=PF3D7_093030…
EKERLER	{'PF3D7_1335300.1-p1:transcript=PF3D7_1335300.1:gene=PF3D7_1335300:organism=Plasmodium_falciparum_3D7:gene_product=reticulocyte_binding_protein_2_homologue_b:transcript_product=reticulocyte_binding_protein_2_homologue_b:location=Pf3D7_13_v3:1428874-1438852(-):protein_length=3254:sequence_SO=chromosome:SO=protein_coding_seq108', 'PF3D7_1335400.1-p1:transcript=PF3D7_1335400.1:gene=PF3D7_1335400:org…
LPRSNTS	{'Plasmodiumfalciparum_AMA1_[K1_allele]_full-length_seq4', 'PF3D7_0930300.1-p1:transcript=PF3D7_0930300.1:gene=PF3D7_0930300:organism=Plasmodium_falciparum_3D7:gene_product=merozoite_surface_protein_1:transcript_product=merozoite_surface_protein_1:location=Pf3D7_09_v3:1201812-1206974(+):protein_length=1720:sequence_SO=chromosome:SO=protein_coding_seq5', 'PF3D7_0930300.1-p1:transcript=PF3D7_093030…
ENIENNE	{'PF3D7_0620400.1-p1:transcript=PF3D7_0620400.1:gene=PF3D7_0620400:organism=Plasmodium_falciparum_3D7:gene_product=merozoite_surface_protein_10:transcript_product=merozoite_surface_protein_10:location=Pf3D7_06_v3:851378-852955(-):protein_length=525:sequence_SO=chromosome:SO=protein_coding_seq6', 'PF3D7_0620400.1-p1:transcript=PF3D7_0620400.1:gene=PF3D7_0620400:organism=Plasmodium_falciparum_3D7:g…
NEDSSNI	{'PF3D7_0919800.1-p1:transcript=PF3D7_0919800.1:gene=PF3D7_0919800:organism=Plasmodium_falciparum_3D7:gene_product=TLD_domain-containing_protein:transcript_product=TLD_domain-containing_protein:location=Pf3D7_09_v3:804417-807920(-):protein_length=1078:sequence_SO=chromosome:SO=protein_coding_seq20', 'PFIT_1145100.1-p1:transcript=PFIT_1145100.1:gene=PFIT_1145100:organism=Plasmodium_falciparum_IT:g…
KAKQEEE	{'PF3D7_1335300.1-p1:transcript=PF3D7_1335300.1:gene=PF3D7_1335300:organism=Plasmodium_falciparum_3D7:gene_product=reticulocyte_binding_protein_2_homologue_b:transcript_product=reticulocyte_binding_protein_2_homologue_b:location=Pf3D7_13_v3:1428874-1438852(-):protein_length=3254:sequence_SO=chromosome:SO=protein_coding_seq108', 'PF3D7_1335400.1-p1:transcript=PF3D7_1335400.1:gene=PF3D7_1335400:org…
DIQSDDI	{'RAJ116var23_seq118', 'PFIT_1240400.1-p1:transcript=PFIT_1240400.1:gene=PFIT_1240400:organism=Plasmodium_falciparum_IT:gene_product=C_ITvar5_-_erythrocyte_membrane_protein_1__PfEMP1__putative:transcript_product=C_ITvar5_-_erythrocyte_membrane_protein_1__PfEMP1__putative:location=PfIT_12_v3:1660899-1668623(+):protein_length=2155:sequence_SO=chromosome:SO=protein_coding_seq73', 'PFIT_0710800.1-p1:…
DNNNINT|ENNNINT	{'PF3D7_0702300.1-p1:transcript=PF3D7_0702300.1:gene=PF3D7_0702300:organism=Plasmodium_falciparum_3D7:gene_product=sporozoite_threonine_and_asparagine-rich_protein:transcript_product=sporozoite_threonine_and_asparagine-rich_protein:location=Pf3D7_07_v3:96761-98730(+):protein_length=594:sequence_SO=chromosome:SO=protein_coding_seq11', 'PF3D7_0702300.1-p1:transcript=PF3D7_0702300.1:gene=PF3D7_07023…
MDNMNNM	{'PF3D7_1419400.1-p1:transcript=PF3D7_1419400.1:gene=PF3D7_1419400:organism=Plasmodium_falciparum_3D7:gene_product=conserved_Plasmodium_membrane_protein__unknown_function:transcript_product=conserved_Plasmodium_membrane_protein__unknown_function:location=Pf3D7_14_v3:804425-811369(-):protein_length=2201:sequence_SO=chromosome:SO=protein_coding_seq22', 'PF3D7_1137600.1-p1:transcript=PF3D7_1137600.1…
KKNKSKS	{'PF3D7_0501400.1-p1:transcript=PF3D7_0501400.1:gene=PF3D7_0501400:organism=Plasmodium_falciparum_3D7:gene_product=interspersed_repeat_antigen:transcript_product=interspersed_repeat_antigen:location=Pf3D7_05_v3:74509-79842(+):protein_length=1720:sequence_SO=chromosome:SO=protein_coding_seq68', 'PF3D7_0501400.1-p1:transcript=PF3D7_0501400.1:gene=PF3D7_0501400:organism=Plasmodium_falciparum_3D7:gen…
KSNGNTL	{"PF3D7_0701600.1-p1:transcript=PF3D7_0701600.1:gene=PF3D7_0701600:organism=Plasmodium_falciparum_3D7:gene_product=Pfmc-2TM_Maurer's_cleft_two_transmembrane_protein:transcript_product=Pfmc-2TM_Maurer's_cleft_two_transmembrane_protein:location=Pf3D7_07_v3:71049-71860(+):protein_length=235:sequence_SO=chromosome:SO=protein_coding_seq2", 'DD2var03_seq107', 'PF3D7_0420900.1-p1:transcript=PF3D7_042090…
DKYDDKY|DKYEDKY	{'PF3D7_0505000.1-p1:transcript=PF3D7_0505000.1:gene=PF3D7_0505000:organism=Plasmodium_falciparum_3D7:gene_product=conserved_Plasmodium_membrane_protein__unknown_function:transcript_product=conserved_Plasmodium_membrane_protein__unknown_function:location=Pf3D7_05_v3:209062-218189(-):protein_length=2975:sequence_SO=chromosome:SO=protein_coding_seq106', 'PFIT_1325800.1-p1:transcript=PFIT_1325800.1:…
KKKKDMN	{'PF3D7_0511500.1-p1:transcript=PF3D7_0511500.1:gene=PF3D7_0511500:organism=Plasmodium_falciparum_3D7:gene_product=RNA_pseudouridylate_synthase__putative:transcript_product=RNA_pseudouridylate_synthase__putative:location=Pf3D7_05_v3:486602-516787(+):protein_length=10061:sequence_SO=chromosome:SO=protein_coding_seq316', 'PF3D7_0511500.1-p1:transcript=PF3D7_0511500.1:gene=PF3D7_0511500:organism=Pla…
YNIKNTN	{'PFIT_1228500.1-p1:transcript=PFIT_1228500.1:gene=PFIT_1228500:organism=Plasmodium_falciparum_IT:gene_product=conserved_Plasmodium_protein__unknown_function:transcript_product=conserved_Plasmodium_protein__unknown_function:location=PfIT_12_v3:1121130-1130633(-):protein_length=3167:sequence_SO=chromosome:SO=protein_coding_seq78', 'PFIT_1228500.1-p1:transcript=PFIT_1228500.1:gene=PFIT_1228500:orga…
RSNTLPR	{'Plasmodiumfalciparum_AMA1_[K1_allele]_full-length_seq4', 'PF3D7_0930300.1-p1:transcript=PF3D7_0930300.1:gene=PF3D7_0930300:organism=Plasmodium_falciparum_3D7:gene_product=merozoite_surface_protein_1:transcript_product=merozoite_surface_protein_1:location=Pf3D7_09_v3:1201812-1206974(+):protein_length=1720:sequence_SO=chromosome:SO=protein_coding_seq5', 'PF3D7_0930300.1-p1:transcript=PF3D7_093030…
KQEQLKK	{'PF3D7_1335300.1-p1:transcript=PF3D7_1335300.1:gene=PF3D7_1335300:organism=Plasmodium_falciparum_3D7:gene_product=reticulocyte_binding_protein_2_homologue_b:transcript_product=reticulocyte_binding_protein_2_homologue_b:location=Pf3D7_13_v3:1428874-1438852(-):protein_length=3254:sequence_SO=chromosome:SO=protein_coding_seq108', 'PF3D7_1335400.1-p1:transcript=PF3D7_1335400.1:gene=PF3D7_1335400:org…
TSKDEED	{'PF3D7_1035700.1-p1:transcript=PF3D7_1035700.1:gene=PF3D7_1035700:organism=Plasmodium_falciparum_3D7:gene_product=duffy_binding-like_merozoite_surface_protein:transcript_product=duffy_binding-like_merozoite_surface_protein:location=Pf3D7_10_v3:1413200-1415293(+):protein_length=697:sequence_SO=chromosome:SO=protein_coding_seq23', 'PF3D7_1035700.1-p1:transcript=PF3D7_1035700.1:gene=PF3D7_1035700:o…
KNNKNNN	{'PFIT_1123800.1-p1:transcript=PFIT_1123800.1:gene=PFIT_1123800:organism=Plasmodium_falciparum_IT:gene_product=dynein_heavy_chain__putative:transcript_product=dynein_heavy_chain__putative:location=PfIT_11_v3:811411-827721(+):protein_length=5253:sequence_SO=chromosome:SO=protein_coding_seq192', 'PF3D7_1228800.1-p1:transcript=PF3D7_1228800.1:gene=PF3D7_1228800:organism=Plasmodium_falciparum_3D7:gen…
ENMNNIN|ENMNNLN	{'PF3D7_1120600.1-p1:transcript=PF3D7_1120600.1:gene=PF3D7_1120600:organism=Plasmodium_falciparum_3D7:gene_product=conserved_Plasmodium_protein__unknown_function:transcript_product=conserved_Plasmodium_protein__unknown_function:location=Pf3D7_11_v3:775233-783639(-):protein_length=2545:sequence_SO=chromosome:SO=protein_coding_seq87', 'PFIT_0321800.1-p1:transcript=PFIT_0321800.1:gene=PFIT_0321800:o…
EKQEKER	{'PF3D7_1335300.1-p1:transcript=PF3D7_1335300.1:gene=PF3D7_1335300:organism=Plasmodium_falciparum_3D7:gene_product=reticulocyte_binding_protein_2_homologue_b:transcript_product=reticulocyte_binding_protein_2_homologue_b:location=Pf3D7_13_v3:1428874-1438852(-):protein_length=3254:sequence_SO=chromosome:SO=protein_coding_seq108', 'PF3D7_1335400.1-p1:transcript=PF3D7_1335400.1:gene=PF3D7_1335400:org…
NDNNNSK|NDNNNTK	{'PF3D7_0702300.1-p1:transcript=PF3D7_0702300.1:gene=PF3D7_0702300:organism=Plasmodium_falciparum_3D7:gene_product=sporozoite_threonine_and_asparagine-rich_protein:transcript_product=sporozoite_threonine_and_asparagine-rich_protein:location=Pf3D7_07_v3:96761-98730(+):protein_length=594:sequence_SO=chromosome:SO=protein_coding_seq18', 'PF3D7_1112600.1-p1:transcript=PF3D7_1112600.1:gene=PF3D7_11126…
IEETKKD|VEETKKD	{'PF3D7_0730900.1-p1:transcript=PF3D7_0730900.1:gene=PF3D7_0730900:organism=Plasmodium_falciparum_3D7:gene_product=EMP1-trafficking_protein:transcript_product=EMP1-trafficking_protein:location=Pf3D7_07_v3:1325375-1331813(+):protein_length=2110:sequence_SO=chromosome:SO=protein_coding_seq54', 'PF3D7_0730900.1-p1:transcript=PF3D7_0730900.1:gene=PF3D7_0730900:organism=Plasmodium_falciparum_3D7:gene_…
PPADASD	{'Plasmodiumfalciparum_AMA1_[K1_allele]_full-length_seq4', 'PF3D7_0930300.1-p1:transcript=PF3D7_0930300.1:gene=PF3D7_0930300:organism=Plasmodium_falciparum_3D7:gene_product=merozoite_surface_protein_1:transcript_product=merozoite_surface_protein_1:location=Pf3D7_09_v3:1201812-1206974(+):protein_length=1720:sequence_SO=chromosome:SO=protein_coding_seq5', 'PF3D7_0930300.1-p1:transcript=PF3D7_093030…
SNNSYSN|SNNSYTN	{'PF3D7_0317700.1-p1:transcript=PF3D7_0317700.1:gene=PF3D7_0317700:organism=Plasmodium_falciparum_3D7:gene_product=CPSF_(cleavage_and_polyadenylation_specific_factor)__subunit_A__putative:transcript_product=CPSF_(cleavage_and_polyadenylation_specific_factor)__subunit_A__putative:location=Pf3D7_03_v3:728259-738076(+):protein_length=2870:sequence_SO=chromosome:SO=protein_coding_seq75', 'PFIT_100730…
DIQNDAI|DIQNDGI	{'PF3D7_1240300.1-p1:transcript=PF3D7_1240300.1:gene=PF3D7_1240300:organism=Plasmodium_falciparum_3D7:gene_product=erythrocyte_membrane_protein_1__PfEMP1:transcript_product=erythrocyte_membrane_protein_1__PfEMP1:location=Pf3D7_12_v3:1694150-1703087(+):protein_length=2646:sequence_SO=chromosome:SO=protein_coding_seq93', 'MAL7P1.56_D6_seq6', 'PFIT_0900200.1-p1:transcript=PFIT_0900200.1:gene=PFIT_09…
NNKYNVD	{'PF3D7_0803100.1-p1:transcript=PF3D7_0803100.1:gene=PF3D7_0803100:organism=Plasmodium_falciparum_3D7:gene_product=U3_small_nucleolar_RNA-associated_protein_14__putative:transcript_product=U3_small_nucleolar_RNA-associated_protein_14__putative:location=Pf3D7_08_v3:199181-202918(-):protein_length=1245:sequence_SO=chromosome:SO=protein_coding_seq32', 'PF3D7_0803100.1-p1:transcript=PF3D7_0803100.1:g…
NDDNKLN|NDDNKVN	{'PF3D7_1206500.1-p1:transcript=PF3D7_1206500.1:gene=PF3D7_1206500:organism=Plasmodium_falciparum_3D7:gene_product=Tat_binding_protein_1(TBP-1)-interacting_protein__putative:transcript_product=Tat_binding_protein_1(TBP-1)-interacting_protein__putative:location=Pf3D7_12_v3:292424-294379(+):protein_length=651:sequence_SO=chromosome:SO=protein_coding_seq2', 'PF3D7_1206500.1-p1:transcript=PF3D7_12065…
EKNEKNM	{'PF3D7_1143100.1-p1:transcript=PF3D7_1143100.1:gene=PF3D7_1143100:organism=Plasmodium_falciparum_3D7:gene_product=AP2_domain_transcription_factor_AP2-O__putative:transcript_product=AP2_domain_transcription_factor_AP2-O__putative:location=Pf3D7_11_v3:1720047-1724861(-):protein_length=1604:sequence_SO=chromosome:SO=protein_coding_seq25', 'PFIT_1143800.1-p1:transcript=PFIT_1143800.1:gene=PFIT_11438…
EQQQKEE	{'PF3D7_1335400.1-p1:transcript=PF3D7_1335400.1:gene=PF3D7_1335400:organism=Plasmodium_falciparum_3D7:gene_product=reticulocyte_binding_protein_2_homologue_a:transcript_product=reticulocyte_binding_protein_2_homologue_a:location=Pf3D7_13_v3:1440779-1450385(+):protein_length=3130:sequence_SO=chromosome:SO=protein_coding_seq110', 'PF3D7_1335300.1-p1:transcript=PF3D7_1335300.1:gene=PF3D7_1335300:org…
KVNHSEK	{'PF3D7_0220100.1-p1:transcript=PF3D7_0220100.1:gene=PF3D7_0220100:organism=Plasmodium_falciparum_3D7:gene_product=DnaJ_protein__putative:transcript_product=DnaJ_protein__putative:location=Pf3D7_02_v3:804520-807741(+):protein_length=997:sequence_SO=chromosome:SO=protein_coding_seq20', 'PF3D7_0220100.1-p1:transcript=PF3D7_0220100.1:gene=PF3D7_0220100:organism=Plasmodium_falciparum_3D7:gene_product…
GWEFGGG	{'PF3D7_1035500.1-p1:transcript=PF3D7_1035500.1:gene=PF3D7_1035500:organism=Plasmodium_falciparum_3D7:gene_product=merozoite_surface_protein_6:transcript_product=merozoite_surface_protein_6:location=Pf3D7_10_v3:1407276-1408391(+):protein_length=371:sequence_SO=chromosome:SO=protein_coding_seq7', 'PF3D7_1035400.1-p1:transcript=PF3D7_1035400.1:gene=PF3D7_1035400:organism=Plasmodium_falciparum_3D7:g…
PSGPSGT	{'Plasmodiumfalciparum_AMA1_[K1_allele]_full-length_seq3', 'Plasmodiumfalciparum_AMA1_[K1_allele]_full-length_seq2', 'Plasmodiumfalciparum_AMA1_[K1_allele]_full-length_seq4', 'PF3D7_0930300.1-p1:transcript=PF3D7_0930300.1:gene=PF3D7_0930300:organism=Plasmodium_falciparum_3D7:gene_product=merozoite_surface_protein_1:transcript_product=merozoite_surface_protein_1:location=Pf3D7_09_v3:1201812-120697…
NVKEDII	{'PFIT_0713300.1-p1:transcript=PFIT_0713300.1:gene=PFIT_0713300:organism=Plasmodium_falciparum_IT:gene_product=conserved_Plasmodium_protein__unknown_function:transcript_product=conserved_Plasmodium_protein__unknown_function:location=PfIT_07_v3:662284-668904(-):protein_length=2206:sequence_SO=chromosome:SO=protein_coding_seq20', 'PF3D7_0715200.1-p1:transcript=PF3D7_0715200.1:gene=PF3D7_0715200:org…
DNTSEET|DQTSEET	{'PFIT_0730400_PFIT_0730400.1_erythrocyte_binding_antigen-175_InterPro_seq42', 'PF3D7_0731500.1-p1:transcript=PF3D7_0731500.1:gene=PF3D7_0731500:organism=Plasmodium_falciparum_3D7:gene_product=erythrocyte_binding_antigen-175:transcript_product=erythrocyte_binding_antigen-175:location=Pf3D7_07_v3:1358055-1362929(+):protein_length=1502:sequence_SO=chromosome:SO=protein_coding_seq44', 'PF3D7_0113000…
WAADPEY|YAADPEY	{'PF3D7_1016300.1-p1:transcript=PF3D7_1016300.1:gene=PF3D7_1016300:organism=Plasmodium_falciparum_3D7:gene_product=glycophorin_binding_protein:transcript_product=glycophorin_binding_protein:location=Pf3D7_10_v3:650898-653567(-):protein_length=824:sequence_SO=chromosome:SO=protein_coding_seq31', 'PF3D7_1016300.1-p1:transcript=PF3D7_1016300.1:gene=PF3D7_1016300:organism=Plasmodium_falciparum_3D7:ge…
ETSADPE	{'PF3D7_1401000.1-p1:transcript=PF3D7_1401000.1:gene=PF3D7_1401000:organism=Plasmodium_falciparum_3D7:gene_product=glycophorin_binding_protein:transcript_product=glycophorin_binding_protein:location=Pf3D7_14_v3:34693-35773(-):protein_length=307:sequence_SO=chromosome:SO=protein_coding_seq11', 'PF3D7_1401000.1-p1:transcript=PF3D7_1401000.1:gene=PF3D7_1401000:organism=Plasmodium_falciparum_3D7:gene…
KNNDNND	{'PFIT_1137600.1-p1:transcript=PFIT_1137600.1:gene=PFIT_1137600:organism=Plasmodium_falciparum_IT:gene_product=subtilisin-like_protease_2:transcript_product=subtilisin-like_protease_2:location=PfIT_11_v3:1393491-1397671(+):protein_length=1345:sequence_SO=chromosome:SO=protein_coding_seq21', 'PF3D7_1229600.1-p1:transcript=PF3D7_1229600.1:gene=PF3D7_1229600:organism=Plasmodium_falciparum_3D7:gene_p…
KNDKKNK	{'PF3D7_0501400.1-p1:transcript=PF3D7_0501400.1:gene=PF3D7_0501400:organism=Plasmodium_falciparum_3D7:gene_product=interspersed_repeat_antigen:transcript_product=interspersed_repeat_antigen:location=Pf3D7_05_v3:74509-79842(+):protein_length=1720:sequence_SO=chromosome:SO=protein_coding_seq17', 'PF3D7_0501400.1-p1:transcript=PF3D7_0501400.1:gene=PF3D7_0501400:organism=Plasmodium_falciparum_3D7:gen…
IIKKNDN|VIKKNDN	{'PF3D7_1013500.1-p1:transcript=PF3D7_1013500.1:gene=PF3D7_1013500:organism=Plasmodium_falciparum_3D7:gene_product=phosphoinositide-specific_phospholipase_C:transcript_product=phosphoinositide-specific_phospholipase_C:location=Pf3D7_10_v3:526840-531448(+):protein_length=1385:sequence_SO=chromosome:SO=protein_coding_seq37', 'PF3D7_0507800.1-p1:transcript=PF3D7_0507800.1:gene=PF3D7_0507800:organism…
KKNSSNN|KKNTSNN	{'PFIT_0710900.1-p1:transcript=PFIT_0710900.1:gene=PFIT_0710900:organism=Plasmodium_falciparum_IT:gene_product=erythrocyte_membrane_protein_1__PfEMP1:transcript_product=erythrocyte_membrane_protein_1__PfEMP1:location=PfIT_07_v3:565906-575206(+):protein_length=2727:sequence_SO=chromosome:SO=protein_coding_seq102', 'PFCLINvar32_seq119', 'IGHvar25_seq80', 'RAJ116var38_seq77', 'PFCLINvar32_seq120', '…
NVNGNVN	{'PF3D7_0407800.1-p1:transcript=PF3D7_0407800.1:gene=PF3D7_0407800:organism=Plasmodium_falciparum_3D7:gene_product=conserved_Plasmodium_protein__unknown_function:transcript_product=conserved_Plasmodium_protein__unknown_function:location=Pf3D7_04_v3:384924-390806(+):protein_length=1960:sequence_SO=chromosome:SO=protein_coding_seq47', 'PFIT_0515500.1-p1:transcript=PFIT_0515500.1:gene=PFIT_0515500:o…
SEEDFEE	{'PF3D7_1038400.1-p1:transcript=PF3D7_1038400.1:gene=PF3D7_1038400:organism=Plasmodium_falciparum_3D7:gene_product=gametocyte-specific_protein:transcript_product=gametocyte-specific_protein:location=Pf3D7_10_v3:1519021-1547825(+):protein_length=9563:sequence_SO=chromosome:SO=protein_coding_seq228', 'PF3D7_1324200.1-p1:transcript=PF3D7_1324200.1:gene=PF3D7_1324200:organism=Plasmodium_falciparum_3D…
DNNNTKI|DNNNTKL	{'PF3D7_0702300.1-p1:transcript=PF3D7_0702300.1:gene=PF3D7_0702300:organism=Plasmodium_falciparum_3D7:gene_product=sporozoite_threonine_and_asparagine-rich_protein:transcript_product=sporozoite_threonine_and_asparagine-rich_protein:location=Pf3D7_07_v3:96761-98730(+):protein_length=594:sequence_SO=chromosome:SO=protein_coding_seq16', 'PFIT_0901800.1-p1:transcript=PFIT_0901800.1:gene=PFIT_0901800:…
NHSEKVN	{'PF3D7_0220100.1-p1:transcript=PF3D7_0220100.1:gene=PF3D7_0220100:organism=Plasmodium_falciparum_3D7:gene_product=DnaJ_protein__putative:transcript_product=DnaJ_protein__putative:location=Pf3D7_02_v3:804520-807741(+):protein_length=997:sequence_SO=chromosome:SO=protein_coding_seq20', 'PF3D7_0220100.1-p1:transcript=PF3D7_0220100.1:gene=PF3D7_0220100:organism=Plasmodium_falciparum_3D7:gene_product…
INKKFSD|INKKYSD	{'PF3D7_1350700.1-p1:transcript=PF3D7_1350700.1:gene=PF3D7_1350700:organism=Plasmodium_falciparum_3D7:gene_product=N6-adenine-specific_methylase__putative:transcript_product=N6-adenine-specific_methylase__putative:location=Pf3D7_13_v3:2023259-2024944(+):protein_length=561:sequence_SO=chromosome:SO=protein_coding_seq9', 'PF3D7_1350700.1-p1:transcript=PF3D7_1350700.1:gene=PF3D7_1350700:organism=Pla…
KLNHSEK|KVNHSEK	{'PF3D7_0220100.1-p1:transcript=PF3D7_0220100.1:gene=PF3D7_0220100:organism=Plasmodium_falciparum_3D7:gene_product=DnaJ_protein__putative:transcript_product=DnaJ_protein__putative:location=Pf3D7_02_v3:804520-807741(+):protein_length=997:sequence_SO=chromosome:SO=protein_coding_seq20', 'PF3D7_0220100.1-p1:transcript=PF3D7_0220100.1:gene=PF3D7_0220100:organism=Plasmodium_falciparum_3D7:gene_product…
ENNENNE	{'PFIT_1237200.1-p1:transcript=PFIT_1237200.1:gene=PFIT_1237200:organism=Plasmodium_falciparum_IT:gene_product=conserved_Plasmodium_protein__unknown_function:transcript_product=conserved_Plasmodium_protein__unknown_function:location=PfIT_12_v3:1510268-1515331(-):protein_length=1687:sequence_SO=chromosome:SO=protein_coding_seq36', 'PFIT_1434600.1-p1:transcript=PFIT_1434600.1:gene=PFIT_1434600:orga…
KIVEEEG|KVVEEEG	{'PF3D7_1035900.1-p1:transcript=PF3D7_1035900.1:gene=PF3D7_1035900:organism=Plasmodium_falciparum_3D7:gene_product=probable_protein__unknown_function:transcript_product=probable_protein__unknown_function:location=Pf3D7_10_v3:1423983-1425683(+):protein_length=566:sequence_SO=chromosome:SO=protein_coding_seq19', 'PF3D7_1149000.1-p1:transcript=PF3D7_1149000.1:gene=PF3D7_1149000:organism=Plasmodium_f…
LNHSEKV|VNHSEKV	{'PF3D7_0220100.1-p1:transcript=PF3D7_0220100.1:gene=PF3D7_0220100:organism=Plasmodium_falciparum_3D7:gene_product=DnaJ_protein__putative:transcript_product=DnaJ_protein__putative:location=Pf3D7_02_v3:804520-807741(+):protein_length=997:sequence_SO=chromosome:SO=protein_coding_seq20', 'PF3D7_0220100.1-p1:transcript=PF3D7_0220100.1:gene=PF3D7_0220100:organism=Plasmodium_falciparum_3D7:gene_product…
NNNDIKD	{'PF3D7_1335400.1-p1:transcript=PF3D7_1335400.1:gene=PF3D7_1335400:organism=Plasmodium_falciparum_3D7:gene_product=reticulocyte_binding_protein_2_homologue_a:transcript_product=reticulocyte_binding_protein_2_homologue_a:location=Pf3D7_13_v3:1440779-1450385(+):protein_length=3130:sequence_SO=chromosome:SO=protein_coding_seq106', 'PF3D7_1335300.1-p1:transcript=PF3D7_1335300.1:gene=PF3D7_1335300:org…
EDNIKNK|EDNVKNK	{'PF3D7_1003400.1-p1:transcript=PF3D7_1003400.1:gene=PF3D7_1003400:organism=Plasmodium_falciparum_3D7:gene_product=conserved_Plasmodium_protein__unknown_function:transcript_product=conserved_Plasmodium_protein__unknown_function:location=Pf3D7_10_v3:152364-158516(-):protein_length=2050:sequence_SO=chromosome:SO=protein_coding_seq39', 'PF3D7_0405300.1-p1:transcript=PF3D7_0405300.1:gene=PF3D7_040530…
YKNNKNN	{'PF3D7_0302100.1-p1:transcript=PF3D7_0302100.1:gene=PF3D7_0302100:organism=Plasmodium_falciparum_3D7:gene_product=serine/threonine_protein_kinase:transcript_product=serine/threonine_protein_kinase:location=Pf3D7_03_v3:114070-118086(+):protein_length=1338:sequence_SO=chromosome:SO=protein_coding_seq37', 'PFIT_1123900.1-p1:transcript=PFIT_1123900.1:gene=PFIT_1123900:organism=Plasmodium_falciparum_…
QSDDIPS|QSDDIPT	{'RAJ116var23_seq118', 'PFIT_1240400.1-p1:transcript=PFIT_1240400.1:gene=PFIT_1240400:organism=Plasmodium_falciparum_IT:gene_product=C_ITvar5_-_erythrocyte_membrane_protein_1__PfEMP1__putative:transcript_product=C_ITvar5_-_erythrocyte_membrane_protein_1__PfEMP1__putative:location=PfIT_12_v3:1660899-1668623(+):protein_length=2155:sequence_SO=chromosome:SO=protein_coding_seq73', 'PFIT_0710800.1-p1:…
ERLEREK	{'PF3D7_1335400.1-p1:transcript=PF3D7_1335400.1:gene=PF3D7_1335400:organism=Plasmodium_falciparum_3D7:gene_product=reticulocyte_binding_protein_2_homologue_a:transcript_product=reticulocyte_binding_protein_2_homologue_a:location=Pf3D7_13_v3:1440779-1450385(+):protein_length=3130:sequence_SO=chromosome:SO=protein_coding_seq110', 'PF3D7_1335300.1-p1:transcript=PF3D7_1335300.1:gene=PF3D7_1335300:org…
KNNKQHD|KNNKQKD	{'PF3D7_1456500.1-p1:transcript=PF3D7_1456500.1:gene=PF3D7_1456500:organism=Plasmodium_falciparum_3D7:gene_product=conserved_Plasmodium_protein__unknown_function:transcript_product=conserved_Plasmodium_protein__unknown_function:location=Pf3D7_14_v3:2314380-2321555(+):protein_length=2391:sequence_SO=chromosome:SO=protein_coding_seq57', 'PF3D7_1456500.1-p1:transcript=PF3D7_1456500.1:gene=PF3D7_1456…
EETEKNI|EETEKQI	{'PFIT_1205900.1-p1:transcript=PFIT_1205900.1:gene=PFIT_1205900:organism=Plasmodium_falciparum_IT:gene_product=conserved_Plasmodium_protein__unknown_function:transcript_product=conserved_Plasmodium_protein__unknown_function:location=PfIT_12_v3:235692-244031(-):protein_length=2779:sequence_SO=chromosome:SO=protein_coding_seq60', 'PF3D7_1442600.1-p1:transcript=PF3D7_1442600.1:gene=PF3D7_1442600:org…
YSDISSS|YSDITSS	{'AAC47438_seq89', 'PF3D7_0324900.1-p1:transcript=PF3D7_0324900.1:gene=PF3D7_0324900:organism=Plasmodium_falciparum_3D7:gene_product=erythrocyte_membrane_protein_1__PfEMP1:transcript_product=erythrocyte_membrane_protein_1__PfEMP1:location=Pf3D7_03_v3:1030822-1038254(-):protein_length=2169:sequence_SO=chromosome:SO=protein_coding_seq73', 'PREICHvar45_seq38', 'IT4var27_seq106', 'PF3D7_1255200.1-p1:…
KGASAQS	{'PF3D7_0930300.1-p1:transcript=PF3D7_0930300.1:gene=PF3D7_0930300:organism=Plasmodium_falciparum_3D7:gene_product=merozoite_surface_protein_1:transcript_product=merozoite_surface_protein_1:location=Pf3D7_09_v3:1201812-1206974(+):protein_length=1720:sequence_SO=chromosome:SO=protein_coding_seq3', 'Plasmodiumfalciparum_AMA1_[K1_allele]_full-length_seq2', 'PF3D7_0930300.1-p1:transcript=PF3D7_093030…
MKKNKNN	{'PF3D7_1228800.1-p1:transcript=PF3D7_1228800.1:gene=PF3D7_1228800:organism=Plasmodium_falciparum_3D7:gene_product=WD_repeat-containing_protein__putative:transcript_product=WD_repeat-containing_protein__putative:location=Pf3D7_12_v3:1169557-1179186(-):protein_length=3209:sequence_SO=chromosome:SO=protein_coding_seq79', 'PF3D7_1228800.1-p1:transcript=PF3D7_1228800.1:gene=PF3D7_1228800:organism=Pla…
IIKEDVK	{'PF3D7_0715200.1-p1:transcript=PF3D7_0715200.1:gene=PF3D7_0715200:organism=Plasmodium_falciparum_3D7:gene_product=conserved_Plasmodium_protein__unknown_function:transcript_product=conserved_Plasmodium_protein__unknown_function:location=Pf3D7_07_v3:676061-682681(-):protein_length=2206:sequence_SO=chromosome:SO=protein_coding_seq20', 'PFIT_0713300.1-p1:transcript=PFIT_0713300.1:gene=PFIT_0713300:o…
DNNNNKN|ENNNNKN	{'PF3D7_0316200.1-p1:transcript=PF3D7_0316200.1:gene=PF3D7_0316200:organism=Plasmodium_falciparum_3D7:gene_product=conserved_Plasmodium_protein__unknown_function:transcript_product=conserved_Plasmodium_protein__unknown_function:location=Pf3D7_03_v3:649849-657247(-):protein_length=2423:sequence_SO=chromosome:SO=protein_coding_seq8', 'PFIT_1227000.1-p1:transcript=PFIT_1227000.1:gene=PFIT_1227000:or…
EENKNEV	{'PF3D7_1420700.1-p1:transcript=PF3D7_1420700.1:gene=PF3D7_1420700:organism=Plasmodium_falciparum_3D7:gene_product=surface_protein_P113:transcript_product=surface_protein_P113:location=Pf3D7_14_v3:860011-863080(+):protein_length=969:sequence_SO=chromosome:SO=protein_coding_seq35', 'PFIT_0506500.1-p1:transcript=PFIT_0506500.1:gene=PFIT_0506500:organism=Plasmodium_falciparum_IT:gene_product=conserv…
KSGDDNK|KSGDENK	{'DD2var04_seq31', 'PF3D7_0507800.1-p1:transcript=PF3D7_0507800.1:gene=PF3D7_0507800:organism=Plasmodium_falciparum_3D7:gene_product=conserved_Plasmodium_protein__unknown_function:transcript_product=conserved_Plasmodium_protein__unknown_function:location=Pf3D7_05_v3:322239-326822(+):protein_length=1527:sequence_SO=chromosome:SO=protein_coding_seq41', 'PFIT_1105400.1-p1:transcript=PFIT_1105400.1:g…
KNDKNDK	{'PF3D7_1441300.1-p1:transcript=PF3D7_1441300.1:gene=PF3D7_1441300:organism=Plasmodium_falciparum_3D7:gene_product=serine/threonine_protein_kinase__putative:transcript_product=serine/threonine_protein_kinase__putative:location=Pf3D7_14_v3:1681791-1689157(+):protein_length=2247:sequence_SO=chromosome:SO=protein_coding_seq80', 'PF3D7_1441300.1-p1:transcript=PF3D7_1441300.1:gene=PF3D7_1441300:organi…
NDDNKLN	{'PF3D7_1206500.1-p1:transcript=PF3D7_1206500.1:gene=PF3D7_1206500:organism=Plasmodium_falciparum_3D7:gene_product=Tat_binding_protein_1(TBP-1)-interacting_protein__putative:transcript_product=Tat_binding_protein_1(TBP-1)-interacting_protein__putative:location=Pf3D7_12_v3:292424-294379(+):protein_length=651:sequence_SO=chromosome:SO=protein_coding_seq2', 'PF3D7_1206500.1-p1:transcript=PF3D7_12065…
NKNNNNK	{'PF3D7_1106700.1-p1:transcript=PF3D7_1106700.1:gene=PF3D7_1106700:organism=Plasmodium_falciparum_3D7:gene_product=DNA_replication_ATP-dependent_helicase/nuclease_DNA2__putative:transcript_product=DNA_replication_ATP-dependent_helicase/nuclease_DNA2__putative:location=Pf3D7_11_v3:279920-282994(-):protein_length=1024:sequence_SO=chromosome:SO=protein_coding_seq27', 'PFIT_1307800.1-p1:transcript=PF…
EQLQKEE	{'PF3D7_1335400.1-p1:transcript=PF3D7_1335400.1:gene=PF3D7_1335400:organism=Plasmodium_falciparum_3D7:gene_product=reticulocyte_binding_protein_2_homologue_a:transcript_product=reticulocyte_binding_protein_2_homologue_a:location=Pf3D7_13_v3:1440779-1450385(+):protein_length=3130:sequence_SO=chromosome:SO=protein_coding_seq110', 'PF3D7_1335300.1-p1:transcript=PF3D7_1335300.1:gene=PF3D7_1335300:org…
AKDAAEK|AKEAAEK	{'PF3D7_1479800.1-p1:transcript=PF3D7_1479800.1:gene=PF3D7_1479800:organism=Plasmodium_falciparum_3D7:gene_product=rifin:transcript_product=rifin:location=Pf3D7_14_v3:3279500-3280662(+):protein_length=344:sequence_SO=chromosome:SO=protein_coding_seq7', 'PF08_0140_D1_seq2', 'PFIT_0300600.1-p1:transcript=PFIT_0300600.1:gene=PFIT_0300600:organism=Plasmodium_falciparum_IT:gene_product=rifin:transcrip…
ENIMSGE	{'PFIT_1342100.1-p1:transcript=PFIT_1342100.1:gene=PFIT_1342100:organism=Plasmodium_falciparum_IT:gene_product=transcription_factor_with_AP2_domain(s):transcript_product=transcription_factor_with_AP2_domain(s):location=PfIT_13_v3:1634784-1646174(-):protein_length=3796:sequence_SO=chromosome:SO=protein_coding_seq29', 'PF3D7_1342900.1-p1:transcript=PF3D7_1342900.1:gene=PF3D7_1342900:organism=Plasmo…
EEVLEEV	{'PF3D7_1038400.1-p1:transcript=PF3D7_1038400.1:gene=PF3D7_1038400:organism=Plasmodium_falciparum_3D7:gene_product=gametocyte-specific_protein:transcript_product=gametocyte-specific_protein:location=Pf3D7_10_v3:1519021-1547825(+):protein_length=9563:sequence_SO=chromosome:SO=protein_coding_seq301', 'PF3D7_1038400.1-p1:transcript=PF3D7_1038400.1:gene=PF3D7_1038400:organism=Plasmodium_falciparum_3D…
KEGNEKE	{'PF3D7_1442600.1-p1:transcript=PF3D7_1442600.1:gene=PF3D7_1442600:organism=Plasmodium_falciparum_3D7:gene_product=TRAP-like_protein:transcript_product=TRAP-like_protein:location=Pf3D7_14_v3:1730087-1740916(+):protein_length=3543:sequence_SO=chromosome:SO=protein_coding_seq115', 'PF3D7_1442600.1-p1:transcript=PF3D7_1442600.1:gene=PF3D7_1442600:organism=Plasmodium_falciparum_3D7:gene_product=TRAP-…
IEKELLK	{'PFIT_1000100.1-p1:transcript=PFIT_1000100.1:gene=PFIT_1000100:organism=Plasmodium_falciparum_IT:gene_product=stevor:transcript_product=stevor:location=PfIT_10_v3:1056-2045(+):protein_length=290:sequence_SO=chromosome:SO=protein_coding_seq4', 'PFIT_1000100.1-p1:transcript=PFIT_1000100.1:gene=PFIT_1000100:organism=Plasmodium_falciparum_IT:gene_product=stevor:transcript_product=stevor:location=PfI…
QKEEELK	{'PF3D7_1335400.1-p1:transcript=PF3D7_1335400.1:gene=PF3D7_1335400:organism=Plasmodium_falciparum_3D7:gene_product=reticulocyte_binding_protein_2_homologue_a:transcript_product=reticulocyte_binding_protein_2_homologue_a:location=Pf3D7_13_v3:1440779-1450385(+):protein_length=3130:sequence_SO=chromosome:SO=protein_coding_seq110', 'PF3D7_1335400.1-p1:transcript=PF3D7_1335400.1:gene=PF3D7_1335400:org…
KYNVDED	{'PF3D7_0803100.1-p1:transcript=PF3D7_0803100.1:gene=PF3D7_0803100:organism=Plasmodium_falciparum_3D7:gene_product=U3_small_nucleolar_RNA-associated_protein_14__putative:transcript_product=U3_small_nucleolar_RNA-associated_protein_14__putative:location=Pf3D7_08_v3:199181-202918(-):protein_length=1245:sequence_SO=chromosome:SO=protein_coding_seq32', 'PF3D7_0803100.1-p1:transcript=PF3D7_0803100.1:g…
LEREKQE	{'PF3D7_1335400.1-p1:transcript=PF3D7_1335400.1:gene=PF3D7_1335400:organism=Plasmodium_falciparum_3D7:gene_product=reticulocyte_binding_protein_2_homologue_a:transcript_product=reticulocyte_binding_protein_2_homologue_a:location=Pf3D7_13_v3:1440779-1450385(+):protein_length=3130:sequence_SO=chromosome:SO=protein_coding_seq110', 'PF3D7_1335300.1-p1:transcript=PF3D7_1335300.1:gene=PF3D7_1335300:org…
ELRKKEQ	{'PF3D7_1335300.1-p1:transcript=PF3D7_1335300.1:gene=PF3D7_1335300:organism=Plasmodium_falciparum_3D7:gene_product=reticulocyte_binding_protein_2_homologue_b:transcript_product=reticulocyte_binding_protein_2_homologue_b:location=Pf3D7_13_v3:1428874-1438852(-):protein_length=3254:sequence_SO=chromosome:SO=protein_coding_seq111', 'PF3D7_1335300.1-p1:transcript=PF3D7_1335300.1:gene=PF3D7_1335300:org…
SAQSGTS	{'PF3D7_0930300.1-p1:transcript=PF3D7_0930300.1:gene=PF3D7_0930300:organism=Plasmodium_falciparum_3D7:gene_product=merozoite_surface_protein_1:transcript_product=merozoite_surface_protein_1:location=Pf3D7_09_v3:1201812-1206974(+):protein_length=1720:sequence_SO=chromosome:SO=protein_coding_seq3', 'Plasmodiumfalciparum_AMA1_[K1_allele]_full-length_seq2', 'PF3D7_0930300.1-p1:transcript=PF3D7_093030…
EEIPEVV|EEVPEVV	{'PF3D7_1038400.1-p1:transcript=PF3D7_1038400.1:gene=PF3D7_1038400:organism=Plasmodium_falciparum_3D7:gene_product=gametocyte-specific_protein:transcript_product=gametocyte-specific_protein:location=Pf3D7_10_v3:1519021-1547825(+):protein_length=9563:sequence_SO=chromosome:SO=protein_coding_seq90', 'PF3D7_1038400.1-p1:transcript=PF3D7_1038400.1:gene=PF3D7_1038400:organism=Plasmodium_falciparum_3D7…
NNDKTKG	{'PF3D7_1013200.1-p1:transcript=PF3D7_1013200.1:gene=PF3D7_1013200:organism=Plasmodium_falciparum_3D7:gene_product=conserved_Plasmodium_protein__unknown_function:transcript_product=conserved_Plasmodium_protein__unknown_function:location=Pf3D7_10_v3:511084-514278(+):protein_length=1064:sequence_SO=chromosome:SO=protein_coding_seq11', 'PFIT_bin00100.1-p1:transcript=PFIT_bin00100.1:gene=PFIT_bin0010…
ILNHKNN|ILNKKNN	{'PF3D7_1318300.1-p1:transcript=PF3D7_1318300.1:gene=PF3D7_1318300:organism=Plasmodium_falciparum_3D7:gene_product=conserved_Plasmodium_protein__unknown_function:transcript_product=conserved_Plasmodium_protein__unknown_function:location=Pf3D7_13_v3:753910-759432(+):protein_length=1840:sequence_SO=chromosome:SO=protein_coding_seq42', 'PF3D7_0622900.1-p1:transcript=PF3D7_0622900.1:gene=PF3D7_062290…
NNDIKDL	{'PF3D7_1335400.1-p1:transcript=PF3D7_1335400.1:gene=PF3D7_1335400:organism=Plasmodium_falciparum_3D7:gene_product=reticulocyte_binding_protein_2_homologue_a:transcript_product=reticulocyte_binding_protein_2_homologue_a:location=Pf3D7_13_v3:1440779-1450385(+):protein_length=3130:sequence_SO=chromosome:SO=protein_coding_seq106', 'PF3D7_1335300.1-p1:transcript=PF3D7_1335300.1:gene=PF3D7_1335300:org…
EKQEQLQ	{'PF3D7_1335400.1-p1:transcript=PF3D7_1335400.1:gene=PF3D7_1335400:organism=Plasmodium_falciparum_3D7:gene_product=reticulocyte_binding_protein_2_homologue_a:transcript_product=reticulocyte_binding_protein_2_homologue_a:location=Pf3D7_13_v3:1440779-1450385(+):protein_length=3130:sequence_SO=chromosome:SO=protein_coding_seq110', 'PF3D7_1335300.1-p1:transcript=PF3D7_1335300.1:gene=PF3D7_1335300:org…
IEKEEEE	{'PF3D7_0930100.1-p1:transcript=PF3D7_0930100.1:gene=PF3D7_0930100:organism=Plasmodium_falciparum_3D7:gene_product=conserved_Plasmodium_protein__unknown_function:transcript_product=conserved_Plasmodium_protein__unknown_function:location=Pf3D7_09_v3:1191787-1195239(-):protein_length=1150:sequence_SO=chromosome:SO=protein_coding_seq39', 'PF3D7_1123100.1-p1:transcript=PF3D7_1123100.1:gene=PF3D7_1123…
RKERERI|RKERERL	{'PF3D7_1335400.1-p1:transcript=PF3D7_1335400.1:gene=PF3D7_1335400:organism=Plasmodium_falciparum_3D7:gene_product=reticulocyte_binding_protein_2_homologue_a:transcript_product=reticulocyte_binding_protein_2_homologue_a:location=Pf3D7_13_v3:1440779-1450385(+):protein_length=3130:sequence_SO=chromosome:SO=protein_coding_seq106', 'PF3D7_1335300.1-p1:transcript=PF3D7_1335300.1:gene=PF3D7_1335300:org…
NKKNNKN	{'PF3D7_0214100.1-p1:transcript=PF3D7_0214100.1:gene=PF3D7_0214100:organism=Plasmodium_falciparum_3D7:gene_product=protein_transport_protein_SEC31:transcript_product=protein_transport_protein_SEC31:location=Pf3D7_02_v3:568529-573315(-):protein_length=1471:sequence_SO=chromosome:SO=protein_coding_seq4', 'PF3D7_1318300.1-p1:transcript=PF3D7_1318300.1:gene=PF3D7_1318300:organism=Plasmodium_falciparu…
VPEEIIE	{'PF3D7_1038400.1-p1:transcript=PF3D7_1038400.1:gene=PF3D7_1038400:organism=Plasmodium_falciparum_3D7:gene_product=gametocyte-specific_protein:transcript_product=gametocyte-specific_protein:location=Pf3D7_10_v3:1519021-1547825(+):protein_length=9563:sequence_SO=chromosome:SO=protein_coding_seq87', 'PF3D7_1038400.1-p1:transcript=PF3D7_1038400.1:gene=PF3D7_1038400:organism=Plasmodium_falciparum_3D7…
QLQKEEE	{'PF3D7_1335400.1-p1:transcript=PF3D7_1335400.1:gene=PF3D7_1335400:organism=Plasmodium_falciparum_3D7:gene_product=reticulocyte_binding_protein_2_homologue_a:transcript_product=reticulocyte_binding_protein_2_homologue_a:location=Pf3D7_13_v3:1440779-1450385(+):protein_length=3130:sequence_SO=chromosome:SO=protein_coding_seq110', 'PF3D7_1335300.1-p1:transcript=PF3D7_1335300.1:gene=PF3D7_1335300:org…
QNKQNKE	{'PF3D7_0202400.1-p1:transcript=PF3D7_0202400.1:gene=PF3D7_0202400:organism=Plasmodium_falciparum_3D7:gene_product=gamete_antigen_27/25__putative:transcript_product=gamete_antigen_27/25__putative:location=Pf3D7_02_v3:120524-124102(+):protein_length=1192:sequence_SO=chromosome:SO=protein_coding_seq5', 'PF3D7_1430300.1-p1:transcript=PF3D7_1430300.1:gene=PF3D7_1430300:organism=Plasmodium_falciparum_…
SDSKINV|TDSKINV	{'PF3D7_1200900.1-p1:transcript=PF3D7_1200900.1:gene=PF3D7_1200900:organism=Plasmodium_falciparum_3D7:gene_product=Plasmodium_exported_protein_(PHISTc)__unknown_function:transcript_product=Plasmodium_exported_protein_(PHISTc)__unknown_function:location=Pf3D7_12_v3:73229-74522(-):protein_length=383:sequence_SO=chromosome:SO=protein_coding_seq8', 'PF3D7_1200900.1-p1:transcript=PF3D7_1200900.1:gene=…
SGASPPA	{'Plasmodiumfalciparum_AMA1_[K1_allele]_full-length_seq4', 'PF3D7_0930300.1-p1:transcript=PF3D7_0930300.1:gene=PF3D7_0930300:organism=Plasmodium_falciparum_3D7:gene_product=merozoite_surface_protein_1:transcript_product=merozoite_surface_protein_1:location=Pf3D7_09_v3:1201812-1206974(+):protein_length=1720:sequence_SO=chromosome:SO=protein_coding_seq5', 'PF3D7_0930300.1-p1:transcript=PF3D7_093030…
ERNKEMD|ERNREMD	{'PF3D7_1228800.1-p1:transcript=PF3D7_1228800.1:gene=PF3D7_1228800:organism=Plasmodium_falciparum_3D7:gene_product=WD_repeat-containing_protein__putative:transcript_product=WD_repeat-containing_protein__putative:location=Pf3D7_12_v3:1169557-1179186(-):protein_length=3209:sequence_SO=chromosome:SO=protein_coding_seq55', 'PFIT_1228500.1-p1:transcript=PFIT_1228500.1:gene=PFIT_1228500:organism=Plasmo…
DNNNTKT	{'PF3D7_0702300.1-p1:transcript=PF3D7_0702300.1:gene=PF3D7_0702300:organism=Plasmodium_falciparum_3D7:gene_product=sporozoite_threonine_and_asparagine-rich_protein:transcript_product=sporozoite_threonine_and_asparagine-rich_protein:location=Pf3D7_07_v3:96761-98730(+):protein_length=594:sequence_SO=chromosome:SO=protein_coding_seq16', 'PF3D7_0702300.1-p1:transcript=PF3D7_0702300.1:gene=PF3D7_07023…
SNTLPRS	{'Plasmodiumfalciparum_AMA1_[K1_allele]_full-length_seq4', 'PF3D7_0930300.1-p1:transcript=PF3D7_0930300.1:gene=PF3D7_0930300:organism=Plasmodium_falciparum_3D7:gene_product=merozoite_surface_protein_1:transcript_product=merozoite_surface_protein_1:location=Pf3D7_09_v3:1201812-1206974(+):protein_length=1720:sequence_SO=chromosome:SO=protein_coding_seq5', 'PF3D7_0930300.1-p1:transcript=PF3D7_093030…
QEIITEE|QEVITEE	{'PF3D7_0500800.1-p1:transcript=PF3D7_0500800.1:gene=PF3D7_0500800:organism=Plasmodium_falciparum_3D7:gene_product=mature_parasite-infected_erythrocyte_surface_antigen:transcript_product=mature_parasite-infected_erythrocyte_surface_antigen:location=Pf3D7_05_v3:43327-47761(-):protein_length=1434:sequence_SO=chromosome:SO=protein_coding_seq28', 'PF3D7_0500800.1-p1:transcript=PF3D7_0500800.1:gene=PF…
EQERQEQ	{'PF3D7_1335400.1-p1:transcript=PF3D7_1335400.1:gene=PF3D7_1335400:organism=Plasmodium_falciparum_3D7:gene_product=reticulocyte_binding_protein_2_homologue_a:transcript_product=reticulocyte_binding_protein_2_homologue_a:location=Pf3D7_13_v3:1440779-1450385(+):protein_length=3130:sequence_SO=chromosome:SO=protein_coding_seq110', 'PF3D7_1335300.1-p1:transcript=PF3D7_1335300.1:gene=PF3D7_1335300:org…
NKELLNK	{'PF3D7_1117900.1-p1:transcript=PF3D7_1117900.1:gene=PF3D7_1117900:organism=Plasmodium_falciparum_3D7:gene_product=conserved_Plasmodium_protein__unknown_function:transcript_product=conserved_Plasmodium_protein__unknown_function:location=Pf3D7_11_v3:678752-683281(+):protein_length=1471:sequence_SO=chromosome:SO=protein_coding_seq53', 'PF3D7_0201900.1-p1:transcript=PF3D7_0201900.1:gene=PF3D7_020190…
KNNDHIN	{'PF3D7_1229600.1-p1:transcript=PF3D7_1229600.1:gene=PF3D7_1229600:organism=Plasmodium_falciparum_3D7:gene_product=conserved_Plasmodium_protein__unknown_function:transcript_product=conserved_Plasmodium_protein__unknown_function:location=Pf3D7_12_v3:1214043-1217715(-):protein_length=1163:sequence_SO=chromosome:SO=protein_coding_seq18', 'PF3D7_1003700.1-p1:transcript=PF3D7_1003700.1:gene=PF3D7_1003…
DNMDNMN|ENMDNMN	{'PF3D7_1415500.1-p1:transcript=PF3D7_1415500.1:gene=PF3D7_1415500:organism=Plasmodium_falciparum_3D7:gene_product=conserved_Plasmodium_membrane_protein__unknown_function:transcript_product=conserved_Plasmodium_membrane_protein__unknown_function:location=Pf3D7_14_v3:624486-628250(-):protein_length=1148:sequence_SO=chromosome:SO=protein_coding_seq23', 'PF3D7_1120600.1-p1:transcript=PF3D7_1120600.1…
GPSGTSP	{'Plasmodiumfalciparum_AMA1_[K1_allele]_full-length_seq3', 'Plasmodiumfalciparum_AMA1_[K1_allele]_full-length_seq2', 'Plasmodiumfalciparum_AMA1_[K1_allele]_full-length_seq4', 'PF3D7_0930300.1-p1:transcript=PF3D7_0930300.1:gene=PF3D7_0930300:organism=Plasmodium_falciparum_3D7:gene_product=merozoite_surface_protein_1:transcript_product=merozoite_surface_protein_1:location=Pf3D7_09_v3:1201812-120697…
EDLYPRH	{'PFIT_1478600.1-p1:transcript=PFIT_1478600.1:gene=PFIT_1478600:organism=Plasmodium_falciparum_IT:gene_product=Plasmodium_exported_protein_(PHISTb)__unknown_function:transcript_product=Plasmodium_exported_protein_(PHISTb)__unknown_function:location=PfIT_14_v3:3210330-3211978(+):protein_length=494:sequence_SO=chromosome:SO=protein_coding_seq16', 'PF3D7_1477500.1-p1:transcript=PF3D7_1477500.1:gene=…
NNNKKDN	{'PFIT_1127700.1-p1:transcript=PFIT_1127700.1:gene=PFIT_1127700:organism=Plasmodium_falciparum_IT:gene_product=RNA-binding_protein__putative:transcript_product=RNA-binding_protein__putative:location=PfIT_11_v3:988650-991397(+):protein_length=915:sequence_SO=chromosome:SO=protein_coding_seq14', 'PFIT_1456800.1-p1:transcript=PFIT_1456800.1:gene=PFIT_1456800:organism=Plasmodium_falciparum_IT:gene_pr…
EITTKGA	{'PF3D7_0930300.1-p1:transcript=PF3D7_0930300.1:gene=PF3D7_0930300:organism=Plasmodium_falciparum_3D7:gene_product=merozoite_surface_protein_1:transcript_product=merozoite_surface_protein_1:location=Pf3D7_09_v3:1201812-1206974(+):protein_length=1720:sequence_SO=chromosome:SO=protein_coding_seq3', 'Plasmodiumfalciparum_AMA1_[K1_allele]_full-length_seq2', 'PF3D7_0930300.1-p1:transcript=PF3D7_093030…
NFDNNKN|NYDNNKN	{'PF3D7_0725100.1-p1:transcript=PF3D7_0725100.1:gene=PF3D7_0725100:organism=Plasmodium_falciparum_3D7:gene_product=conserved_Plasmodium_membrane_protein__unknown_function:transcript_product=conserved_Plasmodium_membrane_protein__unknown_function:location=Pf3D7_07_v3:1065252-1070240(+):protein_length=1576:sequence_SO=chromosome:SO=protein_coding_seq12', 'PF3D7_0728200.1-p1:transcript=PF3D7_0728200…
KNKNNKN	{'PF3D7_1222600.1-p1:transcript=PF3D7_1222600.1:gene=PF3D7_1222600:organism=Plasmodium_falciparum_3D7:gene_product=AP2_domain_transcription_factor_AP2-G:transcript_product=AP2_domain_transcription_factor_AP2-G:location=Pf3D7_12_v3:907203-914501(+):protein_length=2432:sequence_SO=chromosome:SO=protein_coding_seq75', 'PF3D7_1222600.1-p1:transcript=PF3D7_1222600.1:gene=PF3D7_1222600:organism=Plasmod…
NNDKDIF|NNDKDIY	{'PF3D7_1202300.1-p1:transcript=PF3D7_1202300.1:gene=PF3D7_1202300:organism=Plasmodium_falciparum_3D7:gene_product=dynein_heavy_chain__putative:transcript_product=dynein_heavy_chain__putative:location=Pf3D7_12_v3:119402-141499(+):protein_length=5718:sequence_SO=chromosome:SO=protein_coding_seq212', 'PF3D7_1337500.1-p1:transcript=PF3D7_1337500.1:gene=PF3D7_1337500:organism=Plasmodium_falciparum_3D…
KQEQLQK	{'PF3D7_1335400.1-p1:transcript=PF3D7_1335400.1:gene=PF3D7_1335400:organism=Plasmodium_falciparum_3D7:gene_product=reticulocyte_binding_protein_2_homologue_a:transcript_product=reticulocyte_binding_protein_2_homologue_a:location=Pf3D7_13_v3:1440779-1450385(+):protein_length=3130:sequence_SO=chromosome:SO=protein_coding_seq110', 'PF3D7_1335300.1-p1:transcript=PF3D7_1335300.1:gene=PF3D7_1335300:org…
EIITEEV	{'PF3D7_1038400.1-p1:transcript=PF3D7_1038400.1:gene=PF3D7_1038400:organism=Plasmodium_falciparum_3D7:gene_product=gametocyte-specific_protein:transcript_product=gametocyte-specific_protein:location=Pf3D7_10_v3:1519021-1547825(+):protein_length=9563:sequence_SO=chromosome:SO=protein_coding_seq245', 'PF3D7_0500800.1-p1:transcript=PF3D7_0500800.1:gene=PF3D7_0500800:organism=Plasmodium_falciparum_3D…
NKNNKNN	{'PF3D7_1222600.1-p1:transcript=PF3D7_1222600.1:gene=PF3D7_1222600:organism=Plasmodium_falciparum_3D7:gene_product=AP2_domain_transcription_factor_AP2-G:transcript_product=AP2_domain_transcription_factor_AP2-G:location=Pf3D7_12_v3:907203-914501(+):protein_length=2432:sequence_SO=chromosome:SO=protein_coding_seq52', 'PF3D7_1228800.1-p1:transcript=PF3D7_1228800.1:gene=PF3D7_1228800:organism=Plasmod…
ERERLEK	{'PF3D7_1335400.1-p1:transcript=PF3D7_1335400.1:gene=PF3D7_1335400:organism=Plasmodium_falciparum_3D7:gene_product=reticulocyte_binding_protein_2_homologue_a:transcript_product=reticulocyte_binding_protein_2_homologue_a:location=Pf3D7_13_v3:1440779-1450385(+):protein_length=3130:sequence_SO=chromosome:SO=protein_coding_seq106', 'PF3D7_1335300.1-p1:transcript=PF3D7_1335300.1:gene=PF3D7_1335300:org…
KAHEKKE|KGHEKKE	{'PF3D7_0202000.1-p1:transcript=PF3D7_0202000.1:gene=PF3D7_0202000:organism=Plasmodium_falciparum_3D7:gene_product=knob-associated_histidine-rich_protein:transcript_product=knob-associated_histidine-rich_protein:location=Pf3D7_02_v3:103385-105796(-):protein_length=654:sequence_SO=chromosome:SO=protein_coding_seq18', 'PF3D7_0202000.1-p1:transcript=PF3D7_0202000.1:gene=PF3D7_0202000:organism=Plasmo…
KRQEQER	{'PF3D7_1335400.1-p1:transcript=PF3D7_1335400.1:gene=PF3D7_1335400:organism=Plasmodium_falciparum_3D7:gene_product=reticulocyte_binding_protein_2_homologue_a:transcript_product=reticulocyte_binding_protein_2_homologue_a:location=Pf3D7_13_v3:1440779-1450385(+):protein_length=3130:sequence_SO=chromosome:SO=protein_coding_seq110', 'PF3D7_1335400.1-p1:transcript=PF3D7_1335400.1:gene=PF3D7_1335400:org…
KAWAADP|KAYAADP	{'PF3D7_1401000.1-p1:transcript=PF3D7_1401000.1:gene=PF3D7_1401000:organism=Plasmodium_falciparum_3D7:gene_product=glycophorin_binding_protein:transcript_product=glycophorin_binding_protein:location=Pf3D7_14_v3:34693-35773(-):protein_length=307:sequence_SO=chromosome:SO=protein_coding_seq11', 'PF3D7_1401000.1-p1:transcript=PF3D7_1401000.1:gene=PF3D7_1401000:organism=Plasmodium_falciparum_3D7:gene…
KENNDKD|KENNEKD	{'PF3D7_1202300.1-p1:transcript=PF3D7_1202300.1:gene=PF3D7_1202300:organism=Plasmodium_falciparum_3D7:gene_product=dynein_heavy_chain__putative:transcript_product=dynein_heavy_chain__putative:location=Pf3D7_12_v3:119402-141499(+):protein_length=5718:sequence_SO=chromosome:SO=protein_coding_seq212', 'PF3D7_1202300.1-p1:transcript=PF3D7_1202300.1:gene=PF3D7_1202300:organism=Plasmodium_falciparum_3D…
VEEEGEK	{'PF3D7_1035900.1-p1:transcript=PF3D7_1035900.1:gene=PF3D7_1035900:organism=Plasmodium_falciparum_3D7:gene_product=probable_protein__unknown_function:transcript_product=probable_protein__unknown_function:location=Pf3D7_10_v3:1423983-1425683(+):protein_length=566:sequence_SO=chromosome:SO=protein_coding_seq19', 'PF3D7_1035900.1-p1:transcript=PF3D7_1035900.1:gene=PF3D7_1035900:organism=Plasmodium_f…
VDGENKK	{'PF3D7_0108700.1-p1:transcript=PF3D7_0108700.1:gene=PF3D7_0108700:organism=Plasmodium_falciparum_3D7:gene_product=secreted_ookinete_protein__putative:transcript_product=secreted_ookinete_protein__putative:location=Pf3D7_01_v3:352314-356211(-):protein_length=1152:sequence_SO=chromosome:SO=protein_coding_seq5', 'PF3D7_0108700.1-p1:transcript=PF3D7_0108700.1:gene=PF3D7_0108700:organism=Plasmodium_f…
QDVKDDN	{'PF3D7_0904900.1-p1:transcript=PF3D7_0904900.1:gene=PF3D7_0904900:organism=Plasmodium_falciparum_3D7:gene_product=copper-transporting_ATPase:transcript_product=copper-transporting_ATPase:location=Pf3D7_09_v3:224875-232831(-):protein_length=2568:sequence_SO=chromosome:SO=protein_coding_seq54', 'PF3D7_0310200.1-p1:transcript=PF3D7_0310200.1:gene=PF3D7_0310200:organism=Plasmodium_falciparum_3D7:gen…
KDDVKDD	{'PF3D7_1303800.1-p1:transcript=PF3D7_1303800.1:gene=PF3D7_1303800:organism=Plasmodium_falciparum_3D7:gene_product=conserved_Plasmodium_protein__unknown_function:transcript_product=conserved_Plasmodium_protein__unknown_function:location=Pf3D7_13_v3:184845-212660(-):protein_length=9271:sequence_SO=chromosome:SO=protein_coding_seq18', 'PF3D7_0310200.1-p1:transcript=PF3D7_0310200.1:gene=PF3D7_031020…
DIQSDAI|DIQSDGI	{'PF3D7_0100900.1-p1:transcript=PF3D7_0100900.1:gene=PF3D7_0100900:organism=Plasmodium_falciparum_3D7:gene_product=rifin:transcript_product=rifin:location=Pf3D7_01_v3:62187-63400(-):protein_length=350:sequence_SO=chromosome:SO=protein_coding_seq5', 'PF3D7_1040500.1-p1:transcript=PF3D7_1040500.1:gene=PF3D7_1040500:organism=Plasmodium_falciparum_3D7:gene_product=rifin:transcript_product=rifin:locat…
NLQNVQN	{'PF3D7_0322700.1-p1:transcript=PF3D7_0322700.1:gene=PF3D7_0322700:organism=Plasmodium_falciparum_3D7:gene_product=conserved_Plasmodium_protein__unknown_function:transcript_product=conserved_Plasmodium_protein__unknown_function:location=Pf3D7_03_v3:952964-962367(-):protein_length=3096:sequence_SO=chromosome:SO=protein_coding_seq105', 'PFIT_0322800.1-p1:transcript=PFIT_0322800.1:gene=PFIT_0322800:…
KKNKNNK	{'PF3D7_1456500.1-p1:transcript=PF3D7_1456500.1:gene=PF3D7_1456500:organism=Plasmodium_falciparum_3D7:gene_product=conserved_Plasmodium_protein__unknown_function:transcript_product=conserved_Plasmodium_protein__unknown_function:location=Pf3D7_14_v3:2314380-2321555(+):protein_length=2391:sequence_SO=chromosome:SO=protein_coding_seq57', 'PFIT_1029700.1-p1:transcript=PFIT_1029700.1:gene=PFIT_1029700…
GDDNKNG	{'PF3D7_0722200.1-p1:transcript=PF3D7_0722200.1:gene=PF3D7_0722200:organism=Plasmodium_falciparum_3D7:gene_product=rhoptry-associated_leucine_zipper-like_protein_1:transcript_product=rhoptry-associated_leucine_zipper-like_protein_1:location=Pf3D7_07_v3:946363-948612(+):protein_length=749:sequence_SO=chromosome:SO=protein_coding_seq18', 'PF3D7_0507800.1-p1:transcript=PF3D7_0507800.1:gene=PF3D7_050…
RNNKNEN	{'PF3D7_0500800.1-p1:transcript=PF3D7_0500800.1:gene=PF3D7_0500800:organism=Plasmodium_falciparum_3D7:gene_product=mature_parasite-infected_erythrocyte_surface_antigen:transcript_product=mature_parasite-infected_erythrocyte_surface_antigen:location=Pf3D7_05_v3:43327-47761(-):protein_length=1434:sequence_SO=chromosome:SO=protein_coding_seq40', 'PF3D7_0500800.1-p1:transcript=PF3D7_0500800.1:gene=PF…
TEEVIEE	{'PF3D7_1038400.1-p1:transcript=PF3D7_1038400.1:gene=PF3D7_1038400:organism=Plasmodium_falciparum_3D7:gene_product=gametocyte-specific_protein:transcript_product=gametocyte-specific_protein:location=Pf3D7_10_v3:1519021-1547825(+):protein_length=9563:sequence_SO=chromosome:SO=protein_coding_seq209', 'PF3D7_1038400.1-p1:transcript=PF3D7_1038400.1:gene=PF3D7_1038400:organism=Plasmodium_falciparum_3D…
AEENVEE	{'PF3D7_0102200.1-p1:transcript=PF3D7_0102200.1:gene=PF3D7_0102200:organism=Plasmodium_falciparum_3D7:gene_product=ring-infected_erythrocyte_surface_antigen:transcript_product=ring-infected_erythrocyte_surface_antigen:location=Pf3D7_01_v3:98819-102282(+):protein_length=1085:sequence_SO=chromosome:SO=protein_coding_seq37', 'PF3D7_1149200.1-p1:transcript=PF3D7_1149200.1:gene=PF3D7_1149200:organism=…
EDTEEKS|EETEEKS	{'PF3D7_0501400.1-p1:transcript=PF3D7_0501400.1:gene=PF3D7_0501400:organism=Plasmodium_falciparum_3D7:gene_product=interspersed_repeat_antigen:transcript_product=interspersed_repeat_antigen:location=Pf3D7_05_v3:74509-79842(+):protein_length=1720:sequence_SO=chromosome:SO=protein_coding_seq47', 'DD2var45_seq31', 'PF3D7_0400100.1-p1:transcript=PF3D7_0400100.1:gene=PF3D7_0400100:organism=Plasmodium_…
NNKNNKN	{'PFIT_1227000.1-p1:transcript=PFIT_1227000.1:gene=PFIT_1227000:organism=Plasmodium_falciparum_IT:gene_product=conserved_Plasmodium_protein__unknown_function:transcript_product=conserved_Plasmodium_protein__unknown_function:location=PfIT_12_v3:1057613-1061104(+):protein_length=1163:sequence_SO=chromosome:SO=protein_coding_seq37', 'PF3D7_0302100.1-p1:transcript=PF3D7_0302100.1:gene=PF3D7_0302100:o…
IKDGDKI	{'PFIT_0920000.1-p1:transcript=PFIT_0920000.1:gene=PFIT_0920000:organism=Plasmodium_falciparum_IT:gene_product=regulator_of_chromosome_condensation__putative:transcript_product=regulator_of_chromosome_condensation__putative:location=PfIT_09_v3:790912-800562(-):protein_length=3216:sequence_SO=chromosome:SO=protein_coding_seq24', 'PF3D7_0919900.1-p1:transcript=PF3D7_0919900.1:gene=PF3D7_0919900:org…
VKEDIIE	{'PF3D7_0715200.1-p1:transcript=PF3D7_0715200.1:gene=PF3D7_0715200:organism=Plasmodium_falciparum_3D7:gene_product=conserved_Plasmodium_protein__unknown_function:transcript_product=conserved_Plasmodium_protein__unknown_function:location=Pf3D7_07_v3:676061-682681(-):protein_length=2206:sequence_SO=chromosome:SO=protein_coding_seq19', 'PF3D7_0715200.1-p1:transcript=PF3D7_0715200.1:gene=PF3D7_071520…
NKKSNGN	{"PF3D7_1100800.1-p1:transcript=PF3D7_1100800.1:gene=PF3D7_1100800:organism=Plasmodium_falciparum_3D7:gene_product=Pfmc-2TM_Maurer's_cleft_two_transmembrane_protein:transcript_product=Pfmc-2TM_Maurer's_cleft_two_transmembrane_protein:location=Pf3D7_11_v3:59550-60328(+):protein_length=231:sequence_SO=chromosome:SO=protein_coding_seq2", "PF3D7_1100800.1-p1:transcript=PF3D7_1100800.1:gene=PF3D7_1100…
NINDNIN	{'PF3D7_1343900.1-p1:transcript=PF3D7_1343900.1:gene=PF3D7_1343900:organism=Plasmodium_falciparum_3D7:gene_product=U4/U6_small_nuclear_ribonucleoprotein_PRP4__putative:transcript_product=U4/U6_small_nuclear_ribonucleoprotein_PRP4__putative:location=Pf3D7_13_v3:1756212-1758158(+):protein_length=648:sequence_SO=chromosome:SO=protein_coding_seq15', 'PF3D7_1343900.1-p1:transcript=PF3D7_1343900.1:gene…
EKNVSEE	{'PF3D7_1149000.1-p1:transcript=PF3D7_1149000.1:gene=PF3D7_1149000:organism=Plasmodium_falciparum_3D7:gene_product=antigen_332__DBL-like_protein:transcript_product=antigen_332__DBL-like_protein:location=Pf3D7_11_v3:1950210-1968726(+):protein_length=6093:sequence_SO=chromosome:SO=protein_coding_seq33', 'PF3D7_1149000.1-p1:transcript=PF3D7_1149000.1:gene=PF3D7_1149000:organism=Plasmodium_falciparum…
MEKKMEK	{'PFIT_0202400.1-p1:transcript=PFIT_0202400.1:gene=PFIT_0202400:organism=Plasmodium_falciparum_IT:gene_product=protein_kinase__putative:transcript_product=protein_kinase__putative:location=PfIT_02_v3:95554-103023(-):protein_length=2489:sequence_SO=chromosome:SO=protein_coding_seq43', 'PF3D7_1235400.1-p1:transcript=PF3D7_1235400.1:gene=PF3D7_1235400:organism=Plasmodium_falciparum_3D7:gene_product=…
TKGASAQ	{'PF3D7_0930300.1-p1:transcript=PF3D7_0930300.1:gene=PF3D7_0930300:organism=Plasmodium_falciparum_3D7:gene_product=merozoite_surface_protein_1:transcript_product=merozoite_surface_protein_1:location=Pf3D7_09_v3:1201812-1206974(+):protein_length=1720:sequence_SO=chromosome:SO=protein_coding_seq3', 'Plasmodiumfalciparum_AMA1_[K1_allele]_full-length_seq2', 'PF3D7_0930300.1-p1:transcript=PF3D7_093030…
EEVEKEE	{'PF3D7_0114000.1-p1:transcript=PF3D7_0114000.1:gene=PF3D7_0114000:organism=Plasmodium_falciparum_3D7:gene_product=exported_protein_family_1:transcript_product=exported_protein_family_1:location=Pf3D7_01_v3:542480-546983(+):protein_length=1463:sequence_SO=chromosome:SO=protein_coding_seq31', 'PF3D7_0722200.1-p1:transcript=PF3D7_0722200.1:gene=PF3D7_0722200:organism=Plasmodium_falciparum_3D7:gene_…
INDNIND	{'PF3D7_1343900.1-p1:transcript=PF3D7_1343900.1:gene=PF3D7_1343900:organism=Plasmodium_falciparum_3D7:gene_product=U4/U6_small_nuclear_ribonucleoprotein_PRP4__putative:transcript_product=U4/U6_small_nuclear_ribonucleoprotein_PRP4__putative:location=Pf3D7_13_v3:1756212-1758158(+):protein_length=648:sequence_SO=chromosome:SO=protein_coding_seq15', 'PF3D7_1343900.1-p1:transcript=PF3D7_1343900.1:gene…
KEEDDEE	{'PF3D7_1035700.1-p1:transcript=PF3D7_1035700.1:gene=PF3D7_1035700:organism=Plasmodium_falciparum_3D7:gene_product=duffy_binding-like_merozoite_surface_protein:transcript_product=duffy_binding-like_merozoite_surface_protein:location=Pf3D7_10_v3:1413200-1415293(+):protein_length=697:sequence_SO=chromosome:SO=protein_coding_seq24', 'PF3D7_0202400.1-p1:transcript=PF3D7_0202400.1:gene=PF3D7_0202400:o…
EGQIMKA	{'PF3D7_1401000.1-p1:transcript=PF3D7_1401000.1:gene=PF3D7_1401000:organism=Plasmodium_falciparum_3D7:gene_product=glycophorin_binding_protein:transcript_product=glycophorin_binding_protein:location=Pf3D7_14_v3:34693-35773(-):protein_length=307:sequence_SO=chromosome:SO=protein_coding_seq11', 'PF3D7_1401000.1-p1:transcript=PF3D7_1401000.1:gene=PF3D7_1401000:organism=Plasmodium_falciparum_3D7:gene…
KNNNNIK|KNNQNIK	{'PF3D7_0914500.1-p1:transcript=PF3D7_0914500.1:gene=PF3D7_0914500:organism=Plasmodium_falciparum_3D7:gene_product=conserved_Plasmodium_protein__unknown_function:transcript_product=conserved_Plasmodium_protein__unknown_function:location=Pf3D7_09_v3:620788-626149(-):protein_length=1728:sequence_SO=chromosome:SO=protein_coding_seq3', 'PF3D7_1110300.1-p1:transcript=PF3D7_1110300.1:gene=PF3D7_1110300…
NKMNGDN|NKMNGEN	{'PFIT_1342100.1-p1:transcript=PFIT_1342100.1:gene=PFIT_1342100:organism=Plasmodium_falciparum_IT:gene_product=transcription_factor_with_AP2_domain(s):transcript_product=transcription_factor_with_AP2_domain(s):location=PfIT_13_v3:1634784-1646174(-):protein_length=3796:sequence_SO=chromosome:SO=protein_coding_seq29', 'PF3D7_0709300.1-p1:transcript=PF3D7_0709300.1:gene=PF3D7_0709300:organism=Plasmo…
PEYRKHL	{'PF3D7_1016300.1-p1:transcript=PF3D7_1016300.1:gene=PF3D7_1016300:organism=Plasmodium_falciparum_3D7:gene_product=glycophorin_binding_protein:transcript_product=glycophorin_binding_protein:location=Pf3D7_10_v3:650898-653567(-):protein_length=824:sequence_SO=chromosome:SO=protein_coding_seq31', 'PF3D7_1016300.1-p1:transcript=PF3D7_1016300.1:gene=PF3D7_1016300:organism=Plasmodium_falciparum_3D7:ge…
KEEEGKK	{'PF3D7_0114000.1-p1:transcript=PF3D7_0114000.1:gene=PF3D7_0114000:organism=Plasmodium_falciparum_3D7:gene_product=exported_protein_family_1:transcript_product=exported_protein_family_1:location=Pf3D7_01_v3:542480-546983(+):protein_length=1463:sequence_SO=chromosome:SO=protein_coding_seq17', 'PF3D7_0114000.1-p1:transcript=PF3D7_0114000.1:gene=PF3D7_0114000:organism=Plasmodium_falciparum_3D7:gene_…
SESSEET	{'PF3D7_1334500.1-p1:transcript=PF3D7_1334500.1:gene=PF3D7_1334500:organism=Plasmodium_falciparum_3D7:gene_product=MSP7-like_protein:transcript_product=MSP7-like_protein:location=Pf3D7_13_v3:1405731-1407512(-):protein_length=593:sequence_SO=chromosome:SO=protein_coding_seq12', 'IGHvar39_seq118', 'PFCLINvar49_seq87', 'IGHvar39_seq117'}
SRSNTLP	{'Plasmodiumfalciparum_AMA1_[K1_allele]_full-length_seq4', 'PF3D7_0930300.1-p1:transcript=PF3D7_0930300.1:gene=PF3D7_0930300:organism=Plasmodium_falciparum_3D7:gene_product=merozoite_surface_protein_1:transcript_product=merozoite_surface_protein_1:location=Pf3D7_09_v3:1201812-1206974(+):protein_length=1720:sequence_SO=chromosome:SO=protein_coding_seq5', 'PF3D7_0930300.1-p1:transcript=PF3D7_093030…
PEEIAEE|PEEVAEE	{'PF3D7_1038400.1-p1:transcript=PF3D7_1038400.1:gene=PF3D7_1038400:organism=Plasmodium_falciparum_3D7:gene_product=gametocyte-specific_protein:transcript_product=gametocyte-specific_protein:location=Pf3D7_10_v3:1519021-1547825(+):protein_length=9563:sequence_SO=chromosome:SO=protein_coding_seq131', 'PF3D7_1038400.1-p1:transcript=PF3D7_1038400.1:gene=PF3D7_1038400:organism=Plasmodium_falciparum_3D…
EKKDSFL|EKKESFL	{'PF3D7_0506900.1-p1:transcript=PF3D7_0506900.1:gene=PF3D7_0506900:organism=Plasmodium_falciparum_3D7:gene_product=rhomboid_protease_ROM4:transcript_product=rhomboid_protease_ROM4:location=Pf3D7_05_v3:288776-291055(-):protein_length=759:sequence_SO=chromosome:SO=protein_coding_seq6', 'PF3D7_0506900.1-p1:transcript=PF3D7_0506900.1:gene=PF3D7_0506900:organism=Plasmodium_falciparum_3D7:gene_product=…
SNINNKY	{'PFCLINvar48_seq17', 'IGHvar19_seq17', 'PFCLINvar48_seq16', 'IGHvar32_seq16', 'PF3D7_0504000.1-p1:transcript=PF3D7_0504000.1:gene=PF3D7_0504000:organism=Plasmodium_falciparum_3D7:gene_product=cation_transporting_P-ATPase:transcript_product=cation_transporting_P-ATPase:location=Pf3D7_05_v3:157625-164968(+):protein_length=2393:sequence_SO=chromosome:SO=protein_coding_seq69', 'IGHvar32_seq17', 'IGH…
HKEEEHK	{'PF3D7_0113000.1-p1:transcript=PF3D7_0113000.1:gene=PF3D7_0113000:organism=Plasmodium_falciparum_3D7:gene_product=glutamic_acid-rich_protein:transcript_product=glutamic_acid-rich_protein:location=Pf3D7_01_v3:487892-490127(-):protein_length=673:sequence_SO=chromosome:SO=protein_coding_seq14', 'PF3D7_1309400.1-p1:transcript=PF3D7_1309400.1:gene=PF3D7_1309400:organism=Plasmodium_falciparum_3D7:gene…
YAADPEY	{'PF3D7_1016300.1-p1:transcript=PF3D7_1016300.1:gene=PF3D7_1016300:organism=Plasmodium_falciparum_3D7:gene_product=glycophorin_binding_protein:transcript_product=glycophorin_binding_protein:location=Pf3D7_10_v3:650898-653567(-):protein_length=824:sequence_SO=chromosome:SO=protein_coding_seq31', 'PF3D7_1016300.1-p1:transcript=PF3D7_1016300.1:gene=PF3D7_1016300:organism=Plasmodium_falciparum_3D7:ge…
LKKQEQE|LKRQEQE	{'PF3D7_1335400.1-p1:transcript=PF3D7_1335400.1:gene=PF3D7_1335400:organism=Plasmodium_falciparum_3D7:gene_product=reticulocyte_binding_protein_2_homologue_a:transcript_product=reticulocyte_binding_protein_2_homologue_a:location=Pf3D7_13_v3:1440779-1450385(+):protein_length=3130:sequence_SO=chromosome:SO=protein_coding_seq110', 'PF3D7_1335300.1-p1:transcript=PF3D7_1335300.1:gene=PF3D7_1335300:org…
LLSHNNN	{'PF3D7_1335400.1-p1:transcript=PF3D7_1335400.1:gene=PF3D7_1335400:organism=Plasmodium_falciparum_3D7:gene_product=reticulocyte_binding_protein_2_homologue_a:transcript_product=reticulocyte_binding_protein_2_homologue_a:location=Pf3D7_13_v3:1440779-1450385(+):protein_length=3130:sequence_SO=chromosome:SO=protein_coding_seq106', 'PF3D7_1335300.1-p1:transcript=PF3D7_1335300.1:gene=PF3D7_1335300:org…
DKKNNKD|DKKNNRD	{'PF3D7_0511500.1-p1:transcript=PF3D7_0511500.1:gene=PF3D7_0511500:organism=Plasmodium_falciparum_3D7:gene_product=RNA_pseudouridylate_synthase__putative:transcript_product=RNA_pseudouridylate_synthase__putative:location=Pf3D7_05_v3:486602-516787(+):protein_length=10061:sequence_SO=chromosome:SO=protein_coding_seq45', 'PF3D7_0511500.1-p1:transcript=PF3D7_0511500.1:gene=PF3D7_0511500:organism=Plas…
NENNENN	{'PFIT_1237200.1-p1:transcript=PFIT_1237200.1:gene=PFIT_1237200:organism=Plasmodium_falciparum_IT:gene_product=conserved_Plasmodium_protein__unknown_function:transcript_product=conserved_Plasmodium_protein__unknown_function:location=PfIT_12_v3:1510268-1515331(-):protein_length=1687:sequence_SO=chromosome:SO=protein_coding_seq36', 'PFIT_1434600.1-p1:transcript=PFIT_1434600.1:gene=PFIT_1434600:orga…
QEQLQKE	{'PF3D7_1335400.1-p1:transcript=PF3D7_1335400.1:gene=PF3D7_1335400:organism=Plasmodium_falciparum_3D7:gene_product=reticulocyte_binding_protein_2_homologue_a:transcript_product=reticulocyte_binding_protein_2_homologue_a:location=Pf3D7_13_v3:1440779-1450385(+):protein_length=3130:sequence_SO=chromosome:SO=protein_coding_seq110', 'PF3D7_1335300.1-p1:transcript=PF3D7_1335300.1:gene=PF3D7_1335300:org…
EKHEKNE|EKKEKNE	{'PF3D7_1417200.1-p1:transcript=PF3D7_1417200.1:gene=PF3D7_1417200:organism=Plasmodium_falciparum_3D7:gene_product=NOT_family_protein__putative:transcript_product=NOT_family_protein__putative:location=Pf3D7_14_v3:694585-708177(+):protein_length=4466:sequence_SO=chromosome:SO=protein_coding_seq45', 'PF3D7_1417200.1-p1:transcript=PF3D7_1417200.1:gene=PF3D7_1417200:organism=Plasmodium_falciparum_3D7…
EEVAEEV	{'PF3D7_1035900.1-p1:transcript=PF3D7_1035900.1:gene=PF3D7_1035900:organism=Plasmodium_falciparum_3D7:gene_product=probable_protein__unknown_function:transcript_product=probable_protein__unknown_function:location=Pf3D7_10_v3:1423983-1425683(+):protein_length=566:sequence_SO=chromosome:SO=protein_coding_seq19', 'PF3D7_1038400.1-p1:transcript=PF3D7_1038400.1:gene=PF3D7_1038400:organism=Plasmodium_f…
TEEVLEE	{'PF3D7_1149000.1-p1:transcript=PF3D7_1149000.1:gene=PF3D7_1149000:organism=Plasmodium_falciparum_3D7:gene_product=antigen_332__DBL-like_protein:transcript_product=antigen_332__DBL-like_protein:location=Pf3D7_11_v3:1950210-1968726(+):protein_length=6093:sequence_SO=chromosome:SO=protein_coding_seq178', 'PF3D7_1038400.1-p1:transcript=PF3D7_1038400.1:gene=PF3D7_1038400:organism=Plasmodium_falciparu…
VQNVQNV	{'PFIT_0727000.1-p1:transcript=PFIT_0727000.1:gene=PFIT_0727000:organism=Plasmodium_falciparum_IT:gene_product=conserved_Plasmodium_membrane_protein__unknown_function:transcript_product=conserved_Plasmodium_membrane_protein__unknown_function:location=PfIT_07_v3:1184181-1200791(-):protein_length=5536:sequence_SO=chromosome:SO=protein_coding_seq190', 'PF3D7_0322700.1-p1:transcript=PF3D7_0322700.1:g…
KNKNNNN	{'PF3D7_0218600.1-p1:transcript=PF3D7_0218600.1:gene=PF3D7_0218600:organism=Plasmodium_falciparum_3D7:gene_product=conserved_Plasmodium_protein__unknown_function:transcript_product=conserved_Plasmodium_protein__unknown_function:location=Pf3D7_02_v3:755418-762560(+):protein_length=2380:sequence_SO=chromosome:SO=protein_coding_seq40', 'PF3D7_1435600.1-p1:transcript=PF3D7_1435600.1:gene=PF3D7_143560…
KSKNEKQ	{'PF3D7_0501400.1-p1:transcript=PF3D7_0501400.1:gene=PF3D7_0501400:organism=Plasmodium_falciparum_3D7:gene_product=interspersed_repeat_antigen:transcript_product=interspersed_repeat_antigen:location=Pf3D7_05_v3:74509-79842(+):protein_length=1720:sequence_SO=chromosome:SO=protein_coding_seq34', 'PF3D7_0501400.1-p1:transcript=PF3D7_0501400.1:gene=PF3D7_0501400:organism=Plasmodium_falciparum_3D7:gen…
RLEKAKQ	{'PF3D7_1335300.1-p1:transcript=PF3D7_1335300.1:gene=PF3D7_1335300:organism=Plasmodium_falciparum_3D7:gene_product=reticulocyte_binding_protein_2_homologue_b:transcript_product=reticulocyte_binding_protein_2_homologue_b:location=Pf3D7_13_v3:1428874-1438852(-):protein_length=3254:sequence_SO=chromosome:SO=protein_coding_seq108', 'PF3D7_1335400.1-p1:transcript=PF3D7_1335400.1:gene=PF3D7_1335400:org…
NNDKNDN|NNEKNDN	{'PF3D7_1312700.1-p1:transcript=PF3D7_1312700.1:gene=PF3D7_1312700:organism=Plasmodium_falciparum_3D7:gene_product=conserved_Plasmodium_protein__unknown_function:transcript_product=conserved_Plasmodium_protein__unknown_function:location=Pf3D7_13_v3:532270-533958(-):protein_length=562:sequence_SO=chromosome:SO=protein_coding_seq9', 'PF3D7_1312700.1-p1:transcript=PF3D7_1312700.1:gene=PF3D7_1312700:…
NVQQNVQ	{'PF3D7_1474000.1-p1:transcript=PF3D7_1474000.1:gene=PF3D7_1474000:organism=Plasmodium_falciparum_3D7:gene_product=probable_protein__unknown_function:transcript_product=probable_protein__unknown_function:location=Pf3D7_14_v3:3011585-3017899(-):protein_length=2104:sequence_SO=chromosome:SO=protein_coding_seq67', 'PFIT_0518700.1-p1:transcript=PFIT_0518700.1:gene=PFIT_0518700:organism=Plasmodium_fal…
IKNDDIK	{'PF3D7_1359700.1-p1:transcript=PF3D7_1359700.1:gene=PF3D7_1359700:organism=Plasmodium_falciparum_3D7:gene_product=conserved_Plasmodium_protein__unknown_function:transcript_product=conserved_Plasmodium_protein__unknown_function:location=Pf3D7_13_v3:2381165-2392261(+):protein_length=3698:sequence_SO=chromosome:SO=protein_coding_seq37', 'PF3D7_1359700.1-p1:transcript=PF3D7_1359700.1:gene=PF3D7_1359…
DIIKEDV	{'PF3D7_0715200.1-p1:transcript=PF3D7_0715200.1:gene=PF3D7_0715200:organism=Plasmodium_falciparum_3D7:gene_product=conserved_Plasmodium_protein__unknown_function:transcript_product=conserved_Plasmodium_protein__unknown_function:location=Pf3D7_07_v3:676061-682681(-):protein_length=2206:sequence_SO=chromosome:SO=protein_coding_seq20', 'PFIT_0713300.1-p1:transcript=PFIT_0713300.1:gene=PFIT_0713300:o…
QKNNKKN|QKQNKKN	{'PF3D7_1324300.1-p1:transcript=PF3D7_1324300.1:gene=PF3D7_1324300:organism=Plasmodium_falciparum_3D7:gene_product=conserved_Plasmodium_membrane_protein__unknown_function:transcript_product=conserved_Plasmodium_membrane_protein__unknown_function:location=Pf3D7_13_v3:1002748-1019303(-):protein_length=5415:sequence_SO=chromosome:SO=protein_coding_seq73', 'PF3D7_1133800.1-p1:transcript=PF3D7_1133800…
RKHVNVL	{'PF3D7_1401000.1-p1:transcript=PF3D7_1401000.1:gene=PF3D7_1401000:organism=Plasmodium_falciparum_3D7:gene_product=glycophorin_binding_protein:transcript_product=glycophorin_binding_protein:location=Pf3D7_14_v3:34693-35773(-):protein_length=307:sequence_SO=chromosome:SO=protein_coding_seq11', 'PF3D7_1401000.1-p1:transcript=PF3D7_1401000.1:gene=PF3D7_1401000:organism=Plasmodium_falciparum_3D7:gene…
EKQVEEG	{'PF3D7_0500800.1-p1:transcript=PF3D7_0500800.1:gene=PF3D7_0500800:organism=Plasmodium_falciparum_3D7:gene_product=mature_parasite-infected_erythrocyte_surface_antigen:transcript_product=mature_parasite-infected_erythrocyte_surface_antigen:location=Pf3D7_05_v3:43327-47761(-):protein_length=1434:sequence_SO=chromosome:SO=protein_coding_seq32', 'PF3D7_1442600.1-p1:transcript=PF3D7_1442600.1:gene=PF…
MNGDNKM	{'PFIT_1342100.1-p1:transcript=PFIT_1342100.1:gene=PFIT_1342100:organism=Plasmodium_falciparum_IT:gene_product=transcription_factor_with_AP2_domain(s):transcript_product=transcription_factor_with_AP2_domain(s):location=PfIT_13_v3:1634784-1646174(-):protein_length=3796:sequence_SO=chromosome:SO=protein_coding_seq29', 'PF3D7_0709300.1-p1:transcript=PF3D7_0709300.1:gene=PF3D7_0709300:organism=Plasmo…
DKKKKIE	{'PF3D7_0932100.1-p1:transcript=PF3D7_0932100.1:gene=PF3D7_0932100:organism=Plasmodium_falciparum_3D7:gene_product=protein_MAM3__putative:transcript_product=protein_MAM3__putative:location=Pf3D7_09_v3:1279219-1283879(-):protein_length=1274:sequence_SO=chromosome:SO=protein_coding_seq26', 'PF3D7_0505400.1-p1:transcript=PF3D7_0505400.1:gene=PF3D7_0505400:organism=Plasmodium_falciparum_3D7:gene_prod…
DNNNNKN	{'PF3D7_0316200.1-p1:transcript=PF3D7_0316200.1:gene=PF3D7_0316200:organism=Plasmodium_falciparum_3D7:gene_product=conserved_Plasmodium_protein__unknown_function:transcript_product=conserved_Plasmodium_protein__unknown_function:location=Pf3D7_03_v3:649849-657247(-):protein_length=2423:sequence_SO=chromosome:SO=protein_coding_seq8', 'PFIT_1227000.1-p1:transcript=PFIT_1227000.1:gene=PFIT_1227000:or…
QNLQNVQ	{'PF3D7_0322700.1-p1:transcript=PF3D7_0322700.1:gene=PF3D7_0322700:organism=Plasmodium_falciparum_3D7:gene_product=conserved_Plasmodium_protein__unknown_function:transcript_product=conserved_Plasmodium_protein__unknown_function:location=Pf3D7_03_v3:952964-962367(-):protein_length=3096:sequence_SO=chromosome:SO=protein_coding_seq105', 'PFIT_0322800.1-p1:transcript=PFIT_0322800.1:gene=PFIT_0322800:…
KNDDIKN	{'PF3D7_0629700.1-p1:transcript=PF3D7_0629700.1:gene=PF3D7_0629700:organism=Plasmodium_falciparum_3D7:gene_product=SET_domain_protein__putative:transcript_product=SET_domain_protein__putative:location=Pf3D7_06_v3:1221941-1242922(+):protein_length=6753:sequence_SO=chromosome:SO=protein_coding_seq63', 'PF3D7_1359700.1-p1:transcript=PF3D7_1359700.1:gene=PF3D7_1359700:organism=Plasmodium_falciparum_3…
KNDMKKN	{'PFIT_1228500.1-p1:transcript=PFIT_1228500.1:gene=PFIT_1228500:organism=Plasmodium_falciparum_IT:gene_product=conserved_Plasmodium_protein__unknown_function:transcript_product=conserved_Plasmodium_protein__unknown_function:location=PfIT_12_v3:1121130-1130633(-):protein_length=3167:sequence_SO=chromosome:SO=protein_coding_seq78', 'PFIT_1228500.1-p1:transcript=PFIT_1228500.1:gene=PFIT_1228500:orga…
VNYSEKV	{'PF3D7_0220100.1-p1:transcript=PF3D7_0220100.1:gene=PF3D7_0220100:organism=Plasmodium_falciparum_3D7:gene_product=DnaJ_protein__putative:transcript_product=DnaJ_protein__putative:location=Pf3D7_02_v3:804520-807741(+):protein_length=997:sequence_SO=chromosome:SO=protein_coding_seq17', 'PF3D7_0220100.1-p1:transcript=PF3D7_0220100.1:gene=PF3D7_0220100:organism=Plasmodium_falciparum_3D7:gene_product…
SEEIVEE	{'PF3D7_1149000.1-p1:transcript=PF3D7_1149000.1:gene=PF3D7_1149000:organism=Plasmodium_falciparum_3D7:gene_product=antigen_332__DBL-like_protein:transcript_product=antigen_332__DBL-like_protein:location=Pf3D7_11_v3:1950210-1968726(+):protein_length=6093:sequence_SO=chromosome:SO=protein_coding_seq120', 'PF3D7_1149000.1-p1:transcript=PF3D7_1149000.1:gene=PF3D7_1149000:organism=Plasmodium_falciparu…
KNMDNMN|KNMENMN	{'PF3D7_1415500.1-p1:transcript=PF3D7_1415500.1:gene=PF3D7_1415500:organism=Plasmodium_falciparum_3D7:gene_product=conserved_Plasmodium_membrane_protein__unknown_function:transcript_product=conserved_Plasmodium_membrane_protein__unknown_function:location=Pf3D7_14_v3:624486-628250(-):protein_length=1148:sequence_SO=chromosome:SO=protein_coding_seq23', 'PF3D7_1415500.1-p1:transcript=PF3D7_1415500.1…
NNDNDVN|NNENDVN	{'PF3D7_0800300.1-p1:transcript=PF3D7_0800300.1:gene=PF3D7_0800300:organism=Plasmodium_falciparum_3D7:gene_product=erythrocyte_membrane_protein_1__PfEMP1:transcript_product=erythrocyte_membrane_protein_1__PfEMP1:location=Pf3D7_08_v3:40948-50939(+):protein_length=2980:sequence_SO=chromosome:SO=protein_coding_seq60', 'DD2var36_seq60', 'PF3D7_1434500.1-p1:transcript=PF3D7_1434500.1:gene=PF3D7_143450…
MKNIKND	{'PF3D7_1143100.1-p1:transcript=PF3D7_1143100.1:gene=PF3D7_1143100:organism=Plasmodium_falciparum_3D7:gene_product=AP2_domain_transcription_factor_AP2-O__putative:transcript_product=AP2_domain_transcription_factor_AP2-O__putative:location=Pf3D7_11_v3:1720047-1724861(-):protein_length=1604:sequence_SO=chromosome:SO=protein_coding_seq27', 'PFIT_1143800.1-p1:transcript=PFIT_1143800.1:gene=PFIT_11438…
EERKERE	{'PF3D7_1335300.1-p1:transcript=PF3D7_1335300.1:gene=PF3D7_1335300:organism=Plasmodium_falciparum_3D7:gene_product=reticulocyte_binding_protein_2_homologue_b:transcript_product=reticulocyte_binding_protein_2_homologue_b:location=Pf3D7_13_v3:1428874-1438852(-):protein_length=3254:sequence_SO=chromosome:SO=protein_coding_seq108', 'PF3D7_1335400.1-p1:transcript=PF3D7_1335400.1:gene=PF3D7_1335400:org…
KNNNMEH|KNNNMEK	{'PF3D7_0103300.1-p1:transcript=PF3D7_0103300.1:gene=PF3D7_0103300:organism=Plasmodium_falciparum_3D7:gene_product=conserved_Plasmodium_protein__unknown_function:transcript_product=conserved_Plasmodium_protein__unknown_function:location=Pf3D7_01_v3:143640-146396(-):protein_length=918:sequence_SO=chromosome:SO=protein_coding_seq21', 'PF3D7_0213900.1-p1:transcript=PF3D7_0213900.1:gene=PF3D7_0213900…
DKENGTK|EKENGTK	{'PF3D7_0600200.1-p1:transcript=PF3D7_0600200.1:gene=PF3D7_0600200:organism=Plasmodium_falciparum_3D7:gene_product=erythrocyte_membrane_protein_1__PfEMP1:transcript_product=erythrocyte_membrane_protein_1__PfEMP1:location=Pf3D7_06_v3:3503-12835(+):protein_length=2879:sequence_SO=chromosome:SO=protein_coding_seq55', 'PF3D7_1221900.1-p1:transcript=PF3D7_1221900.1:gene=PF3D7_1221900:organism=Plasmodi…
ENVKEDI	{'PFIT_0713300.1-p1:transcript=PFIT_0713300.1:gene=PFIT_0713300:organism=Plasmodium_falciparum_IT:gene_product=conserved_Plasmodium_protein__unknown_function:transcript_product=conserved_Plasmodium_protein__unknown_function:location=PfIT_07_v3:662284-668904(-):protein_length=2206:sequence_SO=chromosome:SO=protein_coding_seq20', 'PF3D7_0715200.1-p1:transcript=PF3D7_0715200.1:gene=PF3D7_0715200:org…
KQKEKYT|KQKERYT	{'PFA0005w_D2_seq14', 'IT4var45_seq16', 'PF3D7_1227700.1-p1:transcript=PF3D7_1227700.1:gene=PF3D7_1227700:organism=Plasmodium_falciparum_3D7:gene_product=conserved_Plasmodium_protein__unknown_function:transcript_product=conserved_Plasmodium_protein__unknown_function:location=Pf3D7_12_v3:1128939-1131686(-):protein_length=771:sequence_SO=chromosome:SO=protein_coding_seq19', 'PFCLINvar74_seq14', 'DD…
MQNLQNV	{'PF3D7_0322700.1-p1:transcript=PF3D7_0322700.1:gene=PF3D7_0322700:organism=Plasmodium_falciparum_3D7:gene_product=conserved_Plasmodium_protein__unknown_function:transcript_product=conserved_Plasmodium_protein__unknown_function:location=Pf3D7_03_v3:952964-962367(-):protein_length=3096:sequence_SO=chromosome:SO=protein_coding_seq106', 'PF3D7_0322700.1-p1:transcript=PF3D7_0322700.1:gene=PF3D7_03227…
EEENDEK|EEENEEK	{'PF3D7_0830500.1-p1:transcript=PF3D7_0830500.1:gene=PF3D7_0830500:organism=Plasmodium_falciparum_3D7:gene_product=sporozoite_and_liver_stage_tryptophan-rich_protein__putative:transcript_product=sporozoite_and_liver_stage_tryptophan-rich_protein__putative:location=Pf3D7_08_v3:1296134-1298328(-):protein_length=675:sequence_SO=chromosome:SO=protein_coding_seq19', 'PFIT_1123800.1-p1:transcript=PFIT_…
DIEEDVE	{'PF3D7_0220000.1-p1:transcript=PF3D7_0220000.1:gene=PF3D7_0220000:organism=Plasmodium_falciparum_3D7:gene_product=liver_stage_antigen_3:transcript_product=liver_stage_antigen_3:location=Pf3D7_02_v3:796752-801586(+):protein_length=1558:sequence_SO=chromosome:SO=protein_coding_seq52', 'PF3D7_0220000.1-p1:transcript=PF3D7_0220000.1:gene=PF3D7_0220000:organism=Plasmodium_falciparum_3D7:gene_product=…
NKDISNK	{'PF3D7_0201900.1-p1:transcript=PF3D7_0201900.1:gene=PF3D7_0201900:organism=Plasmodium_falciparum_3D7:gene_product=erythrocyte_membrane_protein_3:transcript_product=erythrocyte_membrane_protein_3:location=Pf3D7_02_v3:91318-98838(-):protein_length=2441:sequence_SO=chromosome:SO=protein_coding_seq52', 'PF3D7_0201900.1-p1:transcript=PF3D7_0201900.1:gene=PF3D7_0201900:organism=Plasmodium_falciparum_3…
PEEVVEE	{'PF3D7_1038400.1-p1:transcript=PF3D7_1038400.1:gene=PF3D7_1038400:organism=Plasmodium_falciparum_3D7:gene_product=gametocyte-specific_protein:transcript_product=gametocyte-specific_protein:location=Pf3D7_10_v3:1519021-1547825(+):protein_length=9563:sequence_SO=chromosome:SO=protein_coding_seq331', 'PF3D7_1038400.1-p1:transcript=PF3D7_1038400.1:gene=PF3D7_1038400:organism=Plasmodium_falciparum_3D…
ametocyte-specific_protein:location=Pf3D7_10_v3:1519021-1547825(+):protein_length=9563:sequence_SO=chromosome:SO=protein_coding_seq283', 'PF3D7_1038400.1-p1:transcript=PF3D7_1038400.1:gene=PF3D7_1038400:organism=Plasmodium_falciparum_3D7:gene_product=gametocyte-specific_protein:transcript_product=gametocyte-specific_protein:location=Pf3D7_10_v3:1519021-1547825(+):protein_length=9563:sequence_SO=c…
SNINNKF|SNINNKY	{'PF3D7_1355600.1-p1:transcript=PF3D7_1355600.1:gene=PF3D7_1355600:organism=Plasmodium_falciparum_3D7:gene_product=conserved_Plasmodium_protein__unknown_function:transcript_product=conserved_Plasmodium_protein__unknown_function:location=Pf3D7_13_v3:2202611-2204481(-):protein_length=562:sequence_SO=chromosome:SO=protein_coding_seq8', 'PFCLINvar48_seq17', 'IGHvar19_seq17', 'PF3D7_1355600.1-p1:trans…
KSNSTIN|KTNSTIN	{'PF3D7_0800300.1-p1:transcript=PF3D7_0800300.1:gene=PF3D7_0800300:organism=Plasmodium_falciparum_3D7:gene_product=erythrocyte_membrane_protein_1__PfEMP1:transcript_product=erythrocyte_membrane_protein_1__PfEMP1:location=Pf3D7_08_v3:40948-50939(+):protein_length=2980:sequence_SO=chromosome:SO=protein_coding_seq17', 'PF08_0140_D2_seq14', 'PF08_0140_D2_seq13', 'PF3D7_1021800.1-p1:transcript=PF3D7_1…
EEVLPEE	{'PF3D7_1038400.1-p1:transcript=PF3D7_1038400.1:gene=PF3D7_1038400:organism=Plasmodium_falciparum_3D7:gene_product=gametocyte-specific_protein:transcript_product=gametocyte-specific_protein:location=Pf3D7_10_v3:1519021-1547825(+):protein_length=9563:sequence_SO=chromosome:SO=protein_coding_seq295', 'PF3D7_1038400.1-p1:transcript=PF3D7_1038400.1:gene=PF3D7_1038400:organism=Plasmodium_falciparum_3D…
DDGKSDK|DDGKTDK	{'PFIT_bin01300.1-p1:transcript=PFIT_bin01300.1:gene=PFIT_bin01300:organism=Plasmodium_falciparum_IT:gene_product=stevor:transcript_product=stevor:location=PfIT_bin_v3_archived_contig_5:49723-50746(+):protein_length=306:sequence_SO=random_sequence:SO=protein_coding_seq5', 'PFIT_bin01300.1-p1:transcript=PFIT_bin01300.1:gene=PFIT_bin01300:organism=Plasmodium_falciparum_IT:gene_product=stevor:transc…
MKAWAAD|MKAYAAD	{'PF3D7_1401000.1-p1:transcript=PF3D7_1401000.1:gene=PF3D7_1401000:organism=Plasmodium_falciparum_3D7:gene_product=glycophorin_binding_protein:transcript_product=glycophorin_binding_protein:location=Pf3D7_14_v3:34693-35773(-):protein_length=307:sequence_SO=chromosome:SO=protein_coding_seq11', 'PF3D7_1401000.1-p1:transcript=PF3D7_1401000.1:gene=PF3D7_1401000:organism=Plasmodium_falciparum_3D7:gene…
ILGWEFG	{'PF3D7_1035500.1-p1:transcript=PF3D7_1035500.1:gene=PF3D7_1035500:organism=Plasmodium_falciparum_3D7:gene_product=merozoite_surface_protein_6:transcript_product=merozoite_surface_protein_6:location=Pf3D7_10_v3:1407276-1408391(+):protein_length=371:sequence_SO=chromosome:SO=protein_coding_seq7', 'PF3D7_1035400.1-p1:transcript=PF3D7_1035400.1:gene=PF3D7_1035400:organism=Plasmodium_falciparum_3D7:g…
FDLEKQK	{'PF3D7_1149200.1-p1:transcript=PF3D7_1149200.1:gene=PF3D7_1149200:organism=Plasmodium_falciparum_3D7:gene_product=ring-infected_erythrocyte_surface_antigen:transcript_product=ring-infected_erythrocyte_surface_antigen:location=Pf3D7_11_v3:1976407-1979804(+):protein_length=1090:sequence_SO=chromosome:SO=protein_coding_seq17', 'PF3D7_0102200.1-p1:transcript=PF3D7_0102200.1:gene=PF3D7_0102200:organi…
EDEWVTD|EDEYVTD	{'PFIT_bin00100.1-p1:transcript=PFIT_bin00100.1:gene=PFIT_bin00100:organism=Plasmodium_falciparum_IT:gene_product=stB_CS2var_-_erythrocyte_membrane_protein_1__putative:transcript_product=stB_CS2var_-_erythrocyte_membrane_protein_1__putative:location=PfIT_bin_v3_archived_contig_1:7-6690(+):protein_length=2228:sequence_SO=random_sequence:SO=protein_coding_seq87', 'IT4var32a_seq87', 'PF3D7_1149000.1…
ASAQSGT	{'PF3D7_0930300.1-p1:transcript=PF3D7_0930300.1:gene=PF3D7_0930300:organism=Plasmodium_falciparum_3D7:gene_product=merozoite_surface_protein_1:transcript_product=merozoite_surface_protein_1:location=Pf3D7_09_v3:1201812-1206974(+):protein_length=1720:sequence_SO=chromosome:SO=protein_coding_seq3', 'Plasmodiumfalciparum_AMA1_[K1_allele]_full-length_seq2', 'PF3D7_0930300.1-p1:transcript=PF3D7_093030…
SDDKENA|SEDKENA	{'PF3D7_0114000.1-p1:transcript=PF3D7_0114000.1:gene=PF3D7_0114000:organism=Plasmodium_falciparum_3D7:gene_product=exported_protein_family_1:transcript_product=exported_protein_family_1:location=Pf3D7_01_v3:542480-546983(+):protein_length=1463:sequence_SO=chromosome:SO=protein_coding_seq17', 'PF3D7_0114000.1-p1:transcript=PF3D7_0114000.1:gene=PF3D7_0114000:organism=Plasmodium_falciparum_3D7:gene_…
NINSKNN|NINSKQN	{'PF3D7_1229600.1-p1:transcript=PF3D7_1229600.1:gene=PF3D7_1229600:organism=Plasmodium_falciparum_3D7:gene_product=conserved_Plasmodium_protein__unknown_function:transcript_product=conserved_Plasmodium_protein__unknown_function:location=Pf3D7_12_v3:1214043-1217715(-):protein_length=1163:sequence_SO=chromosome:SO=protein_coding_seq18', 'PFIT_0102100.1-p1:transcript=PFIT_0102100.1:gene=PFIT_0102100…
ETQKDQK	{'PF3D7_1023100.1-p1:transcript=PF3D7_1023100.1:gene=PF3D7_1023100:organism=Plasmodium_falciparum_3D7:gene_product=dynein_heavy_chain__putative:transcript_product=dynein_heavy_chain__putative:location=Pf3D7_10_v3:963497-980560(-):protein_length=5687:sequence_SO=chromosome:SO=protein_coding_seq81', 'PFIT_1022600.1-p1:transcript=PFIT_1022600.1:gene=PFIT_1022600:organism=Plasmodium_falciparum_IT:gen…
NVVVNLS	{'PF3D7_0919900.1-p1:transcript=PF3D7_0919900.1:gene=PF3D7_0919900:organism=Plasmodium_falciparum_3D7:gene_product=regulator_of_chromosome_condensation__putative:transcript_product=regulator_of_chromosome_condensation__putative:location=Pf3D7_09_v3:809659-819804(-):protein_length=3381:sequence_SO=chromosome:SO=protein_coding_seq24', 'PFIT_0920000.1-p1:transcript=PFIT_0920000.1:gene=PFIT_0920000:o…
NNMKNMD|NNMKNME	{'PF3D7_1415500.1-p1:transcript=PF3D7_1415500.1:gene=PF3D7_1415500:organism=Plasmodium_falciparum_3D7:gene_product=conserved_Plasmodium_membrane_protein__unknown_function:transcript_product=conserved_Plasmodium_membrane_protein__unknown_function:location=Pf3D7_14_v3:624486-628250(-):protein_length=1148:sequence_SO=chromosome:SO=protein_coding_seq23', 'PF3D7_1415500.1-p1:transcript=PF3D7_1415500.1…
QELDEQK|QELEEQK	{'PF3D7_1335300.1-p1:transcript=PF3D7_1335300.1:gene=PF3D7_1335300:organism=Plasmodium_falciparum_3D7:gene_product=reticulocyte_binding_protein_2_homologue_b:transcript_product=reticulocyte_binding_protein_2_homologue_b:location=Pf3D7_13_v3:1428874-1438852(-):protein_length=3254:sequence_SO=chromosome:SO=protein_coding_seq111', 'PF3D7_1222700.1-p1:transcript=PF3D7_1222700.1:gene=PF3D7_1222700:org…
KEDIIKE	{'PFIT_0713300.1-p1:transcript=PFIT_0713300.1:gene=PFIT_0713300:organism=Plasmodium_falciparum_IT:gene_product=conserved_Plasmodium_protein__unknown_function:transcript_product=conserved_Plasmodium_protein__unknown_function:location=PfIT_07_v3:662284-668904(-):protein_length=2206:sequence_SO=chromosome:SO=protein_coding_seq20', 'PF3D7_0715200.1-p1:transcript=PF3D7_0715200.1:gene=PF3D7_0715200:org…
IQSDDIP	{'RAJ116var23_seq118', 'PFIT_1240400.1-p1:transcript=PFIT_1240400.1:gene=PFIT_1240400:organism=Plasmodium_falciparum_IT:gene_product=C_ITvar5_-_erythrocyte_membrane_protein_1__PfEMP1__putative:transcript_product=C_ITvar5_-_erythrocyte_membrane_protein_1__PfEMP1__putative:location=PfIT_12_v3:1660899-1668623(+):protein_length=2155:sequence_SO=chromosome:SO=protein_coding_seq73', 'PFIT_0710800.1-p1:…
EKDDNYN	{'PFIT_1228500.1-p1:transcript=PFIT_1228500.1:gene=PFIT_1228500:organism=Plasmodium_falciparum_IT:gene_product=conserved_Plasmodium_protein__unknown_function:transcript_product=conserved_Plasmodium_protein__unknown_function:location=PfIT_12_v3:1121130-1130633(-):protein_length=3167:sequence_SO=chromosome:SO=protein_coding_seq78', 'PFIT_1228500.1-p1:transcript=PFIT_1228500.1:gene=PFIT_1228500:orga…
NKDNIYN	{'PFIT_1423400.1-p1:transcript=PFIT_1423400.1:gene=PFIT_1423400:organism=Plasmodium_falciparum_IT:gene_product=conserved_Plasmodium_protein__unknown_function:transcript_product=conserved_Plasmodium_protein__unknown_function:location=PfIT_14_v3:928046-932965(+):protein_length=1639:sequence_SO=chromosome:SO=protein_coding_seq11', 'PF3D7_0620400.1-p1:transcript=PF3D7_0620400.1:gene=PF3D7_0620400:org…
KNDDIKN|KNDDIRN	{'PF3D7_0629700.1-p1:transcript=PF3D7_0629700.1:gene=PF3D7_0629700:organism=Plasmodium_falciparum_3D7:gene_product=SET_domain_protein__putative:transcript_product=SET_domain_protein__putative:location=Pf3D7_06_v3:1221941-1242922(+):protein_length=6753:sequence_SO=chromosome:SO=protein_coding_seq63', 'PF3D7_1359700.1-p1:transcript=PF3D7_1359700.1:gene=PF3D7_1359700:organism=Plasmodium_falciparum_3…
NDKNDKN	{'PF3D7_1441300.1-p1:transcript=PF3D7_1441300.1:gene=PF3D7_1441300:organism=Plasmodium_falciparum_3D7:gene_product=serine/threonine_protein_kinase__putative:transcript_product=serine/threonine_protein_kinase__putative:location=Pf3D7_14_v3:1681791-1689157(+):protein_length=2247:sequence_SO=chromosome:SO=protein_coding_seq80', 'PF3D7_1441300.1-p1:transcript=PF3D7_1441300.1:gene=PF3D7_1441300:organi…
NYKNDKN	{'PF3D7_1441300.1-p1:transcript=PF3D7_1441300.1:gene=PF3D7_1441300:organism=Plasmodium_falciparum_3D7:gene_product=serine/threonine_protein_kinase__putative:transcript_product=serine/threonine_protein_kinase__putative:location=Pf3D7_14_v3:1681791-1689157(+):protein_length=2247:sequence_SO=chromosome:SO=protein_coding_seq80', 'PF3D7_1037400.1-p1:transcript=PF3D7_1037400.1:gene=PF3D7_1037400:organi…
EETESIK	{'PF3D7_1149000.1-p1:transcript=PF3D7_1149000.1:gene=PF3D7_1149000:organism=Plasmodium_falciparum_3D7:gene_product=antigen_332__DBL-like_protein:transcript_product=antigen_332__DBL-like_protein:location=Pf3D7_11_v3:1950210-1968726(+):protein_length=6093:sequence_SO=chromosome:SO=protein_coding_seq174', 'PF3D7_0220000.1-p1:transcript=PF3D7_0220000.1:gene=PF3D7_0220000:organism=Plasmodium_falciparu…
IMKAWAA|IMKAYAA	{'PF3D7_1401000.1-p1:transcript=PF3D7_1401000.1:gene=PF3D7_1401000:organism=Plasmodium_falciparum_3D7:gene_product=glycophorin_binding_protein:transcript_product=glycophorin_binding_protein:location=Pf3D7_14_v3:34693-35773(-):protein_length=307:sequence_SO=chromosome:SO=protein_coding_seq11', 'PF3D7_1401000.1-p1:transcript=PF3D7_1401000.1:gene=PF3D7_1401000:organism=Plasmodium_falciparum_3D7:gene…
SSDSENI	{'PF3D7_0620400.1-p1:transcript=PF3D7_0620400.1:gene=PF3D7_0620400:organism=Plasmodium_falciparum_3D7:gene_product=merozoite_surface_protein_10:transcript_product=merozoite_surface_protein_10:location=Pf3D7_06_v3:851378-852955(-):protein_length=525:sequence_SO=chromosome:SO=protein_coding_seq12', 'PF3D7_0620400.1-p1:transcript=PF3D7_0620400.1:gene=PF3D7_0620400:organism=Plasmodium_falciparum_3D7:…
EALKKQE|EALKRQE	{'PF3D7_1335400.1-p1:transcript=PF3D7_1335400.1:gene=PF3D7_1335400:organism=Plasmodium_falciparum_3D7:gene_product=reticulocyte_binding_protein_2_homologue_a:transcript_product=reticulocyte_binding_protein_2_homologue_a:location=Pf3D7_13_v3:1440779-1450385(+):protein_length=3130:sequence_SO=chromosome:SO=protein_coding_seq110', 'PF3D7_1335300.1-p1:transcript=PF3D7_1335300.1:gene=PF3D7_1335300:org…
EEIVEEE	{'PF3D7_1149000.1-p1:transcript=PF3D7_1149000.1:gene=PF3D7_1149000:organism=Plasmodium_falciparum_3D7:gene_product=antigen_332__DBL-like_protein:transcript_product=antigen_332__DBL-like_protein:location=Pf3D7_11_v3:1950210-1968726(+):protein_length=6093:sequence_SO=chromosome:SO=protein_coding_seq79', 'PF3D7_1149000.1-p1:transcript=PF3D7_1149000.1:gene=PF3D7_1149000:organism=Plasmodium_falciparum…
MKNMDNM|MKNMENM	{'PF3D7_1415500.1-p1:transcript=PF3D7_1415500.1:gene=PF3D7_1415500:organism=Plasmodium_falciparum_3D7:gene_product=conserved_Plasmodium_membrane_protein__unknown_function:transcript_product=conserved_Plasmodium_membrane_protein__unknown_function:location=Pf3D7_14_v3:624486-628250(-):protein_length=1148:sequence_SO=chromosome:SO=protein_coding_seq23', 'PF3D7_1415500.1-p1:transcript=PF3D7_1415500.1…
EKVVKEE	{'PF3D7_1038400.1-p1:transcript=PF3D7_1038400.1:gene=PF3D7_1038400:organism=Plasmodium_falciparum_3D7:gene_product=gametocyte-specific_protein:transcript_product=gametocyte-specific_protein:location=Pf3D7_10_v3:1519021-1547825(+):protein_length=9563:sequence_SO=chromosome:SO=protein_coding_seq34', 'PF3D7_1149000.1-p1:transcript=PF3D7_1149000.1:gene=PF3D7_1149000:organism=Plasmodium_falciparum_3D7…
NDKDNDK	{'PF3D7_1245600.1-p1:transcript=PF3D7_1245600.1:gene=PF3D7_1245600:organism=Plasmodium_falciparum_3D7:gene_product=kinesin__putative:transcript_product=kinesin__putative:location=Pf3D7_12_v3:1900249-1905066(-):protein_length=1605:sequence_SO=chromosome:SO=protein_coding_seq19', 'PF3D7_1245600.1-p1:transcript=PF3D7_1245600.1:gene=PF3D7_1245600:organism=Plasmodium_falciparum_3D7:gene_product=kinesi…
YRKHVNV	{'PF3D7_1401000.1-p1:transcript=PF3D7_1401000.1:gene=PF3D7_1401000:organism=Plasmodium_falciparum_3D7:gene_product=glycophorin_binding_protein:transcript_product=glycophorin_binding_protein:location=Pf3D7_14_v3:34693-35773(-):protein_length=307:sequence_SO=chromosome:SO=protein_coding_seq11', 'PF3D7_1401000.1-p1:transcript=PF3D7_1401000.1:gene=PF3D7_1401000:organism=Plasmodium_falciparum_3D7:gene…
LNNNDSK	{'PF3D7_0509400.1-p1:transcript=PF3D7_0509400.1:gene=PF3D7_0509400:organism=Plasmodium_falciparum_3D7:gene_product=RNA_polymerase_I:transcript_product=RNA_polymerase_I:location=Pf3D7_05_v3:389914-398997(-):protein_length=2914:sequence_SO=chromosome:SO=protein_coding_seq40', 'PF3D7_1035300.1-p1:transcript=PF3D7_1035300.1:gene=PF3D7_1035300:organism=Plasmodium_falciparum_3D7:gene_product=glutamate-…
EKQIEEG|EKQVEEG	{'PF3D7_0500800.1-p1:transcript=PF3D7_0500800.1:gene=PF3D7_0500800:organism=Plasmodium_falciparum_3D7:gene_product=mature_parasite-infected_erythrocyte_surface_antigen:transcript_product=mature_parasite-infected_erythrocyte_surface_antigen:location=Pf3D7_05_v3:43327-47761(-):protein_length=1434:sequence_SO=chromosome:SO=protein_coding_seq32', 'PF3D7_1442600.1-p1:transcript=PF3D7_1442600.1:gene=PF…
ENVEENV	{'PF3D7_1149200.1-p1:transcript=PF3D7_1149200.1:gene=PF3D7_1149200:organism=Plasmodium_falciparum_3D7:gene_product=ring-infected_erythrocyte_surface_antigen:transcript_product=ring-infected_erythrocyte_surface_antigen:location=Pf3D7_11_v3:1976407-1979804(+):protein_length=1090:sequence_SO=chromosome:SO=protein_coding_seq38', 'PF3D7_1149200.1-p1:transcript=PF3D7_1149200.1:gene=PF3D7_1149200:organi…
QNVQNAQ	{'PF3D7_1472200.1-p1:transcript=PF3D7_1472200.1:gene=PF3D7_1472200:organism=Plasmodium_falciparum_3D7:gene_product=histone_deacetylase__putative:transcript_product=histone_deacetylase__putative:location=Pf3D7_14_v3:2945662-2952551(+):protein_length=2251:sequence_SO=chromosome:SO=protein_coding_seq29', 'PFIT_0727000.1-p1:transcript=PFIT_0727000.1:gene=PFIT_0727000:organism=Plasmodium_falciparum_IT…
YSNDINI	{'PF3D7_1139300.1-p1:transcript=PF3D7_1139300.1:gene=PF3D7_1139300:organism=Plasmodium_falciparum_3D7:gene_product=AP2_domain_transcription_factor__putative:transcript_product=AP2_domain_transcription_factor__putative:location=Pf3D7_11_v3:1556744-1565045(-):protein_length=2653:sequence_SO=chromosome:SO=protein_coding_seq1', 'PF3D7_0704100.1-p1:transcript=PF3D7_0704100.1:gene=PF3D7_0704100:organis…
EHKEEEH	{'PF3D7_0113000.1-p1:transcript=PF3D7_0113000.1:gene=PF3D7_0113000:organism=Plasmodium_falciparum_3D7:gene_product=glutamic_acid-rich_protein:transcript_product=glutamic_acid-rich_protein:location=Pf3D7_01_v3:487892-490127(-):protein_length=673:sequence_SO=chromosome:SO=protein_coding_seq14', 'PF3D7_1309400.1-p1:transcript=PF3D7_1309400.1:gene=PF3D7_1309400:organism=Plasmodium_falciparum_3D7:gene…
NTDPNDD|NTDPNDE	{'PF3D7_1016300.1-p1:transcript=PF3D7_1016300.1:gene=PF3D7_1016300:organism=Plasmodium_falciparum_3D7:gene_product=glycophorin_binding_protein:transcript_product=glycophorin_binding_protein:location=Pf3D7_10_v3:650898-653567(-):protein_length=824:sequence_SO=chromosome:SO=protein_coding_seq31', 'PF3D7_1016300.1-p1:transcript=PF3D7_1016300.1:gene=PF3D7_1016300:organism=Plasmodium_falciparum_3D7:ge…
DNIKNKG|DNVKNKG	{'PF3D7_1003400.1-p1:transcript=PF3D7_1003400.1:gene=PF3D7_1003400:organism=Plasmodium_falciparum_3D7:gene_product=conserved_Plasmodium_protein__unknown_function:transcript_product=conserved_Plasmodium_protein__unknown_function:location=Pf3D7_10_v3:152364-158516(-):protein_length=2050:sequence_SO=chromosome:SO=protein_coding_seq39', 'PF3D7_0405300.1-p1:transcript=PF3D7_0405300.1:gene=PF3D7_040530…
DVEEDIE	{'PF3D7_0220000.1-p1:transcript=PF3D7_0220000.1:gene=PF3D7_0220000:organism=Plasmodium_falciparum_3D7:gene_product=liver_stage_antigen_3:transcript_product=liver_stage_antigen_3:location=Pf3D7_02_v3:796752-801586(+):protein_length=1558:sequence_SO=chromosome:SO=protein_coding_seq52', 'PF3D7_0220000.1-p1:transcript=PF3D7_0220000.1:gene=PF3D7_0220000:organism=Plasmodium_falciparum_3D7:gene_product=…
NKEENNK	{'PF3D7_1201400.1-p1:transcript=PF3D7_1201400.1:gene=PF3D7_1201400:organism=Plasmodium_falciparum_3D7:gene_product=Plasmodium_exported_protein__unknown_function:transcript_product=Plasmodium_exported_protein__unknown_function:location=Pf3D7_12_v3:93581-97146(-):protein_length=1129:sequence_SO=chromosome:SO=protein_coding_seq39', 'PF3D7_1201400.1-p1:transcript=PF3D7_1201400.1:gene=PF3D7_1201400:or…
DIKKDDI	{'PF3D7_0310200.1-p1:transcript=PF3D7_0310200.1:gene=PF3D7_0310200:organism=Plasmodium_falciparum_3D7:gene_product=phd_finger_protein__putative:transcript_product=phd_finger_protein__putative:location=Pf3D7_03_v3:427290-440942(+):protein_length=4550:sequence_SO=chromosome:SO=protein_coding_seq159', 'PF3D7_0310200.1-p1:transcript=PF3D7_0310200.1:gene=PF3D7_0310200:organism=Plasmodium_falciparum_3D…
NIMSGEN	{'PFIT_1342100.1-p1:transcript=PFIT_1342100.1:gene=PFIT_1342100:organism=Plasmodium_falciparum_IT:gene_product=transcription_factor_with_AP2_domain(s):transcript_product=transcription_factor_with_AP2_domain(s):location=PfIT_13_v3:1634784-1646174(-):protein_length=3796:sequence_SO=chromosome:SO=protein_coding_seq29', 'PF3D7_1342900.1-p1:transcript=PF3D7_1342900.1:gene=PF3D7_1342900:organism=Plasmo…
EKEKQEK	{'PF3D7_1335300.1-p1:transcript=PF3D7_1335300.1:gene=PF3D7_1335300:organism=Plasmodium_falciparum_3D7:gene_product=reticulocyte_binding_protein_2_homologue_b:transcript_product=reticulocyte_binding_protein_2_homologue_b:location=Pf3D7_13_v3:1428874-1438852(-):protein_length=3254:sequence_SO=chromosome:SO=protein_coding_seq108', 'PF3D7_1335400.1-p1:transcript=PF3D7_1335400.1:gene=PF3D7_1335400:org…
NKDNKDN	{'PF3D7_0620400.1-p1:transcript=PF3D7_0620400.1:gene=PF3D7_0620400:organism=Plasmodium_falciparum_3D7:gene_product=merozoite_surface_protein_10:transcript_product=merozoite_surface_protein_10:location=Pf3D7_06_v3:851378-852955(-):protein_length=525:sequence_SO=chromosome:SO=protein_coding_seq3', 'PF3D7_0919900.1-p1:transcript=PF3D7_0919900.1:gene=PF3D7_0919900:organism=Plasmodium_falciparum_3D7:g…
LNELLSH	{'PF3D7_1335400.1-p1:transcript=PF3D7_1335400.1:gene=PF3D7_1335400:organism=Plasmodium_falciparum_3D7:gene_product=reticulocyte_binding_protein_2_homologue_a:transcript_product=reticulocyte_binding_protein_2_homologue_a:location=Pf3D7_13_v3:1440779-1450385(+):protein_length=3130:sequence_SO=chromosome:SO=protein_coding_seq106', 'PF3D7_1335300.1-p1:transcript=PF3D7_1335300.1:gene=PF3D7_1335300:org…
SGTSPSS	{'Plasmodiumfalciparum_AMA1_[K1_allele]_full-length_seq3', 'Plasmodiumfalciparum_AMA1_[K1_allele]_full-length_seq4', 'PF3D7_0930300.1-p1:transcript=PF3D7_0930300.1:gene=PF3D7_0930300:organism=Plasmodium_falciparum_3D7:gene_product=merozoite_surface_protein_1:transcript_product=merozoite_surface_protein_1:location=Pf3D7_09_v3:1201812-1206974(+):protein_length=1720:sequence_SO=chromosome:SO=protein…
NKDNIHE	{'PF3D7_0405300.1-p1:transcript=PF3D7_0405300.1:gene=PF3D7_0405300:organism=Plasmodium_falciparum_3D7:gene_product=liver_specific_protein_2__putative:transcript_product=liver_specific_protein_2__putative:location=Pf3D7_04_v3:282403-288297(-):protein_length=1964:sequence_SO=chromosome:SO=protein_coding_seq74', 'PF3D7_0618000.1-p1:transcript=PF3D7_0618000.1:gene=PF3D7_0618000:organism=Plasmodium_fa…
TKKVNYS	{'PF3D7_0220100.1-p1:transcript=PF3D7_0220100.1:gene=PF3D7_0220100:organism=Plasmodium_falciparum_3D7:gene_product=DnaJ_protein__putative:transcript_product=DnaJ_protein__putative:location=Pf3D7_02_v3:804520-807741(+):protein_length=997:sequence_SO=chromosome:SO=protein_coding_seq17', 'PF3D7_0220100.1-p1:transcript=PF3D7_0220100.1:gene=PF3D7_0220100:organism=Plasmodium_falciparum_3D7:gene_product…
SEEIIEE	{'PF3D7_1149000.1-p1:transcript=PF3D7_1149000.1:gene=PF3D7_1149000:organism=Plasmodium_falciparum_3D7:gene_product=antigen_332__DBL-like_protein:transcript_product=antigen_332__DBL-like_protein:location=Pf3D7_11_v3:1950210-1968726(+):protein_length=6093:sequence_SO=chromosome:SO=protein_coding_seq80', 'PF3D7_1222700.1-p1:transcript=PF3D7_1222700.1:gene=PF3D7_1222700:organism=Plasmodium_falciparum…
KIEKEKI	{'PF3D7_1318400.1-p1:transcript=PF3D7_1318400.1:gene=PF3D7_1318400:organism=Plasmodium_falciparum_3D7:gene_product=structural_maintenance_of_chromosomes_protein_2__putative:transcript_product=structural_maintenance_of_chromosomes_protein_2__putative:location=Pf3D7_13_v3:760326-764139(-):protein_length=1218:sequence_SO=chromosome:SO=protein_coding_seq11', 'PF3D7_0405300.1-p1:transcript=PF3D7_04053…
VQNVQNA	{'PF3D7_1472200.1-p1:transcript=PF3D7_1472200.1:gene=PF3D7_1472200:organism=Plasmodium_falciparum_3D7:gene_product=histone_deacetylase__putative:transcript_product=histone_deacetylase__putative:location=Pf3D7_14_v3:2945662-2952551(+):protein_length=2251:sequence_SO=chromosome:SO=protein_coding_seq29', 'PFIT_0727000.1-p1:transcript=PFIT_0727000.1:gene=PFIT_0727000:organism=Plasmodium_falciparum_IT…
EEVVPEK	{'PF3D7_1038400.1-p1:transcript=PF3D7_1038400.1:gene=PF3D7_1038400:organism=Plasmodium_falciparum_3D7:gene_product=gametocyte-specific_protein:transcript_product=gametocyte-specific_protein:location=Pf3D7_10_v3:1519021-1547825(+):protein_length=9563:sequence_SO=chromosome:SO=protein_coding_seq271', 'PF3D7_1038400.1-p1:transcript=PF3D7_1038400.1:gene=PF3D7_1038400:organism=Plasmodium_falciparum_3D…
NDNVDNI	{'PF3D7_0322700.1-p1:transcript=PF3D7_0322700.1:gene=PF3D7_0322700:organism=Plasmodium_falciparum_3D7:gene_product=conserved_Plasmodium_protein__unknown_function:transcript_product=conserved_Plasmodium_protein__unknown_function:location=Pf3D7_03_v3:952964-962367(-):protein_length=3096:sequence_SO=chromosome:SO=protein_coding_seq58', 'PFIT_0322800.1-p1:transcript=PFIT_0322800.1:gene=PFIT_0322800:o…
GDSKLKG|GESKLKG	{'RAJ116var08_seq31', 'PFIT_1232300.1-p1:transcript=PFIT_1232300.1:gene=PFIT_1232300:organism=Plasmodium_falciparum_IT:gene_product=CG2-related_protein__putative:transcript_product=CG2-related_protein__putative:location=PfIT_12_v3:1291215-1294687(-):protein_length=1072:sequence_SO=chromosome:SO=protein_coding_seq26', 'IT4var07_seq50', 'PFIT_1232300.1-p1:transcript=PFIT_1232300.1:gene=PFIT_1232300…
EDIIKED	{'PFIT_0713300.1-p1:transcript=PFIT_0713300.1:gene=PFIT_0713300:organism=Plasmodium_falciparum_IT:gene_product=conserved_Plasmodium_protein__unknown_function:transcript_product=conserved_Plasmodium_protein__unknown_function:location=PfIT_07_v3:662284-668904(-):protein_length=2206:sequence_SO=chromosome:SO=protein_coding_seq20', 'PF3D7_0715200.1-p1:transcript=PF3D7_0715200.1:gene=PF3D7_0715200:org…
EKKKKEE|ERKKKEE	{'IT4var06_seq63', 'PFIT_1205900.1-p1:transcript=PFIT_1205900.1:gene=PFIT_1205900:organism=Plasmodium_falciparum_IT:gene_product=conserved_Plasmodium_protein__unknown_function:transcript_product=conserved_Plasmodium_protein__unknown_function:location=PfIT_12_v3:235692-244031(-):protein_length=2779:sequence_SO=chromosome:SO=protein_coding_seq83', 'IGHvar26_seq58', 'PF13_0003_D5_seq9', 'IT4var06_se…
LQKEEEL	{'PF3D7_1335400.1-p1:transcript=PF3D7_1335400.1:gene=PF3D7_1335400:organism=Plasmodium_falciparum_3D7:gene_product=reticulocyte_binding_protein_2_homologue_a:transcript_product=reticulocyte_binding_protein_2_homologue_a:location=Pf3D7_13_v3:1440779-1450385(+):protein_length=3130:sequence_SO=chromosome:SO=protein_coding_seq110', 'PF3D7_1335400.1-p1:transcript=PF3D7_1335400.1:gene=PF3D7_1335400:org…
HEKNEKN|KEKNEKN	{'PF3D7_1417200.1-p1:transcript=PF3D7_1417200.1:gene=PF3D7_1417200:organism=Plasmodium_falciparum_3D7:gene_product=NOT_family_protein__putative:transcript_product=NOT_family_protein__putative:location=Pf3D7_14_v3:694585-708177(+):protein_length=4466:sequence_SO=chromosome:SO=protein_coding_seq45', 'PF3D7_1417200.1-p1:transcript=PF3D7_1417200.1:gene=PF3D7_1417200:organism=Plasmodium_falciparum_3D7…
IKENVKE	{'PFIT_0713300.1-p1:transcript=PFIT_0713300.1:gene=PFIT_0713300:organism=Plasmodium_falciparum_IT:gene_product=conserved_Plasmodium_protein__unknown_function:transcript_product=conserved_Plasmodium_protein__unknown_function:location=PfIT_07_v3:662284-668904(-):protein_length=2206:sequence_SO=chromosome:SO=protein_coding_seq20', 'PF3D7_0715200.1-p1:transcript=PF3D7_0715200.1:gene=PF3D7_0715200:org…
DSNNMDI	{'PFIT_0731700.1-p1:transcript=PFIT_0731700.1:gene=PFIT_0731700:organism=Plasmodium_falciparum_IT:gene_product=erythrocyte_membrane_protein_1__PfEMP1:transcript_product=erythrocyte_membrane_protein_1__PfEMP1:location=PfIT_07_v3:1391055-1398246(-):protein_length=2073:sequence_SO=chromosome:SO=protein_coding_seq82', 'PFIT_0731700.1-p1:transcript=PFIT_0731700.1:gene=PFIT_0731700:organism=Plasmodium_…
SSDNNNN|STDNNNN	{'PF3D7_0702300.1-p1:transcript=PF3D7_0702300.1:gene=PF3D7_0702300:organism=Plasmodium_falciparum_3D7:gene_product=sporozoite_threonine_and_asparagine-rich_protein:transcript_product=sporozoite_threonine_and_asparagine-rich_protein:location=Pf3D7_07_v3:96761-98730(+):protein_length=594:sequence_SO=chromosome:SO=protein_coding_seq16', 'PF3D7_0702300.1-p1:transcript=PF3D7_0702300.1:gene=PF3D7_07023…
RLQKEEE	{'PF3D7_1335400.1-p1:transcript=PF3D7_1335400.1:gene=PF3D7_1335400:organism=Plasmodium_falciparum_3D7:gene_product=reticulocyte_binding_protein_2_homologue_a:transcript_product=reticulocyte_binding_protein_2_homologue_a:location=Pf3D7_13_v3:1440779-1450385(+):protein_length=3130:sequence_SO=chromosome:SO=protein_coding_seq110', 'PF3D7_1335400.1-p1:transcript=PF3D7_1335400.1:gene=PF3D7_1335400:org…
IKNIDGI|IKNVDGI	{'PF3D7_1203300.1-p1:transcript=PF3D7_1203300.1:gene=PF3D7_1203300:organism=Plasmodium_falciparum_3D7:gene_product=conserved_Plasmodium_protein__unknown_function:transcript_product=conserved_Plasmodium_protein__unknown_function:location=Pf3D7_12_v3:173875-176853(-):protein_length=992:sequence_SO=chromosome:SO=protein_coding_seq9', 'PF3D7_1203300.1-p1:transcript=PF3D7_1203300.1:gene=PF3D7_1203300:…
VDENVEE|VEENVEE	{'PF3D7_1149200.1-p1:transcript=PF3D7_1149200.1:gene=PF3D7_1149200:organism=Plasmodium_falciparum_3D7:gene_product=ring-infected_erythrocyte_surface_antigen:transcript_product=ring-infected_erythrocyte_surface_antigen:location=Pf3D7_11_v3:1976407-1979804(+):protein_length=1090:sequence_SO=chromosome:SO=protein_coding_seq38', 'PF3D7_1149200.1-p1:transcript=PF3D7_1149200.1:gene=PF3D7_1149200:organi…
KHVNVLY	{'PF3D7_1401000.1-p1:transcript=PF3D7_1401000.1:gene=PF3D7_1401000:organism=Plasmodium_falciparum_3D7:gene_product=glycophorin_binding_protein:transcript_product=glycophorin_binding_protein:location=Pf3D7_14_v3:34693-35773(-):protein_length=307:sequence_SO=chromosome:SO=protein_coding_seq11', 'PF3D7_1401000.1-p1:transcript=PF3D7_1401000.1:gene=PF3D7_1401000:organism=Plasmodium_falciparum_3D7:gene…
LEKGIKE|VEKGIKE	{'PF3D7_0500800.1-p1:transcript=PF3D7_0500800.1:gene=PF3D7_0500800:organism=Plasmodium_falciparum_3D7:gene_product=mature_parasite-infected_erythrocyte_surface_antigen:transcript_product=mature_parasite-infected_erythrocyte_surface_antigen:location=Pf3D7_05_v3:43327-47761(-):protein_length=1434:sequence_SO=chromosome:SO=protein_coding_seq32', 'PF3D7_1318400.1-p1:transcript=PF3D7_1318400.1:gene=PF…
VTEEVIE	{'PF3D7_1038400.1-p1:transcript=PF3D7_1038400.1:gene=PF3D7_1038400:organism=Plasmodium_falciparum_3D7:gene_product=gametocyte-specific_protein:transcript_product=gametocyte-specific_protein:location=Pf3D7_10_v3:1519021-1547825(+):protein_length=9563:sequence_SO=chromosome:SO=protein_coding_seq209', 'PF3D7_1038400.1-p1:transcript=PF3D7_1038400.1:gene=PF3D7_1038400:organism=Plasmodium_falciparum_3D…
EENVEEN	{'PF3D7_1149200.1-p1:transcript=PF3D7_1149200.1:gene=PF3D7_1149200:organism=Plasmodium_falciparum_3D7:gene_product=ring-infected_erythrocyte_surface_antigen:transcript_product=ring-infected_erythrocyte_surface_antigen:location=Pf3D7_11_v3:1976407-1979804(+):protein_length=1090:sequence_SO=chromosome:SO=protein_coding_seq38', 'PF3D7_1149200.1-p1:transcript=PF3D7_1149200.1:gene=PF3D7_1149200:organi…
SAFGGGL	{'IT4var31_seq65', 'IT4var31_seq64', 'PFIT_bin09600.1-p1:transcript=PFIT_bin09600.1:gene=PFIT_bin09600:organism=Plasmodium_falciparum_IT:gene_product=B_ITvar19_-_erythrocyte_membrane_protein_1__PfEMP1__putative:transcript_product=B_ITvar19_-_erythrocyte_membrane_protein_1__PfEMP1__putative:location=PfIT_bin_v3_archived_contig_27:17-4166(+):protein_length=1177:sequence_SO=random_sequence:SO=protei…
QNVQNVQ	{'PFIT_0914100.1-p1:transcript=PFIT_0914100.1:gene=PFIT_0914100:organism=Plasmodium_falciparum_IT:gene_product=pseudouridylate_synthase__putative:transcript_product=pseudouridylate_synthase__putative:location=PfIT_09_v3:579330-582215(+):protein_length=961:sequence_SO=chromosome:SO=protein_coding_seq18', 'PF3D7_0903300.1-p1:transcript=PF3D7_0903300.1:gene=PF3D7_0903300:organism=Plasmodium_falcipar…
GKNEKNE	{'PF3D7_0516000.1-p1:transcript=PF3D7_0516000.1:gene=PF3D7_0516000:organism=Plasmodium_falciparum_3D7:gene_product=RAP_protein__putative:transcript_product=RAP_protein__putative:location=Pf3D7_05_v3:663551-666917(+):protein_length=1084:sequence_SO=chromosome:SO=protein_coding_seq10', 'PF3D7_1478600.1-p1:transcript=PF3D7_1478600.1:gene=PF3D7_1478600:organism=Plasmodium_falciparum_3D7:gene_product=…
QNVEQNV	{'PF3D7_1474000.1-p1:transcript=PF3D7_1474000.1:gene=PF3D7_1474000:organism=Plasmodium_falciparum_3D7:gene_product=probable_protein__unknown_function:transcript_product=probable_protein__unknown_function:location=Pf3D7_14_v3:3011585-3017899(-):protein_length=2104:sequence_SO=chromosome:SO=protein_coding_seq67', 'PF3D7_1146800.1-p1:transcript=PF3D7_1146800.1:gene=PF3D7_1146800:organism=Plasmodium_…
EDIIEED	{'PF3D7_0715200.1-p1:transcript=PF3D7_0715200.1:gene=PF3D7_0715200:organism=Plasmodium_falciparum_3D7:gene_product=conserved_Plasmodium_protein__unknown_function:transcript_product=conserved_Plasmodium_protein__unknown_function:location=Pf3D7_07_v3:676061-682681(-):protein_length=2206:sequence_SO=chromosome:SO=protein_coding_seq19', 'PF3D7_0715200.1-p1:transcript=PF3D7_0715200.1:gene=PF3D7_071520…
KIKELEE	{'PF3D7_0216900.1-p1:transcript=PF3D7_0216900.1:gene=PF3D7_0216900:organism=Plasmodium_falciparum_3D7:gene_product=conserved_Plasmodium_protein__unknown_function:transcript_product=conserved_Plasmodium_protein__unknown_function:location=Pf3D7_02_v3:701245-702894(+):protein_length=549:sequence_SO=chromosome:SO=protein_coding_seq19', 'PFCLINvar06_seq57', 'PFCLINvar06_seq58', 'PF3D7_0216900.1-p1:tra…
INDKINE	{'PF3D7_0604500.1-p1:transcript=PF3D7_0604500.1:gene=PF3D7_0604500:organism=Plasmodium_falciparum_3D7:gene_product=conserved_Plasmodium_protein__unknown_function:transcript_product=conserved_Plasmodium_protein__unknown_function:location=Pf3D7_06_v3:189012-198078(+):protein_length=2874:sequence_SO=chromosome:SO=protein_coding_seq105', 'PF3D7_0604500.1-p1:transcript=PF3D7_0604500.1:gene=PF3D7_06045…
KEIEEEI|KELEEEI	{'PF3D7_1442600.1-p1:transcript=PF3D7_1442600.1:gene=PF3D7_1442600:organism=Plasmodium_falciparum_3D7:gene_product=TRAP-like_protein:transcript_product=TRAP-like_protein:location=Pf3D7_14_v3:1730087-1740916(+):protein_length=3543:sequence_SO=chromosome:SO=protein_coding_seq114', 'PF3D7_1442600.1-p1:transcript=PF3D7_1442600.1:gene=PF3D7_1442600:organism=Plasmodium_falciparum_3D7:gene_product=TRAP-…
NNKNFDN|NNKNYDN	{'PF3D7_0725100.1-p1:transcript=PF3D7_0725100.1:gene=PF3D7_0725100:organism=Plasmodium_falciparum_3D7:gene_product=conserved_Plasmodium_membrane_protein__unknown_function:transcript_product=conserved_Plasmodium_membrane_protein__unknown_function:location=Pf3D7_07_v3:1065252-1070240(+):protein_length=1576:sequence_SO=chromosome:SO=protein_coding_seq11', 'PF3D7_0725100.1-p1:transcript=PF3D7_0725100…
LEKQKYM	{'PF3D7_1149200.1-p1:transcript=PF3D7_1149200.1:gene=PF3D7_1149200:organism=Plasmodium_falciparum_3D7:gene_product=ring-infected_erythrocyte_surface_antigen:transcript_product=ring-infected_erythrocyte_surface_antigen:location=Pf3D7_11_v3:1976407-1979804(+):protein_length=1090:sequence_SO=chromosome:SO=protein_coding_seq17', 'PF3D7_0102200.1-p1:transcript=PF3D7_0102200.1:gene=PF3D7_0102200:organi…
NKNTDIK	{'PF3D7_0702300.1-p1:transcript=PF3D7_0702300.1:gene=PF3D7_0702300:organism=Plasmodium_falciparum_3D7:gene_product=sporozoite_threonine_and_asparagine-rich_protein:transcript_product=sporozoite_threonine_and_asparagine-rich_protein:location=Pf3D7_07_v3:96761-98730(+):protein_length=594:sequence_SO=chromosome:SO=protein_coding_seq11', 'PF3D7_0702300.1-p1:transcript=PF3D7_0702300.1:gene=PF3D7_07023…
NKIEESN	{'PF3D7_0221700.1-p1:transcript=PF3D7_0221700.1:gene=PF3D7_0221700:organism=Plasmodium_falciparum_3D7:gene_product=Plasmodium_exported_protein__unknown_function:transcript_product=Plasmodium_exported_protein__unknown_function:location=Pf3D7_02_v3:869508-871124(-):protein_length=493:sequence_SO=chromosome:SO=protein_coding_seq12', 'PF3D7_0221700.1-p1:transcript=PF3D7_0221700.1:gene=PF3D7_0221700:o…
KIILKDK	{'PF3D7_1040700.1-p1:transcript=PF3D7_1040700.1:gene=PF3D7_1040700:organism=Plasmodium_falciparum_3D7:gene_product=rifin:transcript_product=rifin:location=Pf3D7_10_v3:1622368-1623684(+):protein_length=372:sequence_SO=chromosome:SO=protein_coding_seq3', 'PFIT_bin07100.1-p1:transcript=PFIT_bin07100.1:gene=PFIT_bin07100:organism=Plasmodium_falciparum_IT:gene_product=rifin:transcript_product=rifin:lo…
script_product=rifin:location=Pf3D7_04_v3:1152504-1153633(-):protein_length=324:sequence_SO=chromosome:SO=protein_coding_seq3', 'PF3D7_1300200.1-p1:transcript=PF3D7_1300200.1:gene=PF3D7_1300200:organism=Plasmodium_falciparum_3D7:gene_product=rifin:transcript_product=rifin:location=Pf3D7_13_v3:30605-31881(-):protein_length=348:sequence_SO=chromosome:SO=protein_coding_seq4', 'PF3D7_1101300.1-p1:tra…
NGDNKMN	{'PFIT_1342100.1-p1:transcript=PFIT_1342100.1:gene=PFIT_1342100:organism=Plasmodium_falciparum_IT:gene_product=transcription_factor_with_AP2_domain(s):transcript_product=transcription_factor_with_AP2_domain(s):location=PfIT_13_v3:1634784-1646174(-):protein_length=3796:sequence_SO=chromosome:SO=protein_coding_seq29', 'PF3D7_0709300.1-p1:transcript=PF3D7_0709300.1:gene=PF3D7_0709300:organism=Plasmo…
KDQKDQK	{'PF3D7_1023100.1-p1:transcript=PF3D7_1023100.1:gene=PF3D7_1023100:organism=Plasmodium_falciparum_3D7:gene_product=dynein_heavy_chain__putative:transcript_product=dynein_heavy_chain__putative:location=Pf3D7_10_v3:963497-980560(-):protein_length=5687:sequence_SO=chromosome:SO=protein_coding_seq82', 'PF3D7_1023100.1-p1:transcript=PF3D7_1023100.1:gene=PF3D7_1023100:organism=Plasmodium_falciparum_3D7…
TSPSSRS	{'Plasmodiumfalciparum_AMA1_[K1_allele]_full-length_seq4', 'PF3D7_0930300.1-p1:transcript=PF3D7_0930300.1:gene=PF3D7_0930300:organism=Plasmodium_falciparum_3D7:gene_product=merozoite_surface_protein_1:transcript_product=merozoite_surface_protein_1:location=Pf3D7_09_v3:1201812-1206974(+):protein_length=1720:sequence_SO=chromosome:SO=protein_coding_seq5', 'PF3D7_0930300.1-p1:transcript=PF3D7_093030…
TSSGASP	{'Plasmodiumfalciparum_AMA1_[K1_allele]_full-length_seq4', 'PF3D7_0930300.1-p1:transcript=PF3D7_0930300.1:gene=PF3D7_0930300:organism=Plasmodium_falciparum_3D7:gene_product=merozoite_surface_protein_1:transcript_product=merozoite_surface_protein_1:location=Pf3D7_09_v3:1201812-1206974(+):protein_length=1720:sequence_SO=chromosome:SO=protein_coding_seq5', 'PF3D7_0930300.1-p1:transcript=PF3D7_093030…
NNDVVKN	{'PFIT_1325700.1-p1:transcript=PFIT_1325700.1:gene=PFIT_1325700:organism=Plasmodium_falciparum_IT:gene_product=conserved_Plasmodium_protein__unknown_function:transcript_product=conserved_Plasmodium_protein__unknown_function:location=PfIT_13_v3:1064013-1070402(-):protein_length=2129:sequence_SO=chromosome:SO=protein_coding_seq59', 'PFIT_1325700.1-p1:transcript=PFIT_1325700.1:gene=PFIT_1325700:orga…
EDNNNKY	{'PF3D7_0803100.1-p1:transcript=PF3D7_0803100.1:gene=PF3D7_0803100:organism=Plasmodium_falciparum_3D7:gene_product=U3_small_nucleolar_RNA-associated_protein_14__putative:transcript_product=U3_small_nucleolar_RNA-associated_protein_14__putative:location=Pf3D7_08_v3:199181-202918(-):protein_length=1245:sequence_SO=chromosome:SO=protein_coding_seq32', 'PF3D7_0803100.1-p1:transcript=PF3D7_0803100.1:g…
KNDNKDN|KNENKDN	{'PF3D7_0620400.1-p1:transcript=PF3D7_0620400.1:gene=PF3D7_0620400:organism=Plasmodium_falciparum_3D7:gene_product=merozoite_surface_protein_10:transcript_product=merozoite_surface_protein_10:location=Pf3D7_06_v3:851378-852955(-):protein_length=525:sequence_SO=chromosome:SO=protein_coding_seq3', 'PF3D7_0500800.1-p1:transcript=PF3D7_0500800.1:gene=PF3D7_0500800:organism=Plasmodium_falciparum_3D7:g…
YNVDEDN	{'PF3D7_0803100.1-p1:transcript=PF3D7_0803100.1:gene=PF3D7_0803100:organism=Plasmodium_falciparum_3D7:gene_product=U3_small_nucleolar_RNA-associated_protein_14__putative:transcript_product=U3_small_nucleolar_RNA-associated_protein_14__putative:location=Pf3D7_08_v3:199181-202918(-):protein_length=1245:sequence_SO=chromosome:SO=protein_coding_seq32', 'PF3D7_0803100.1-p1:transcript=PF3D7_0803100.1:g…
QNVQQNV	{'PF3D7_1474000.1-p1:transcript=PF3D7_1474000.1:gene=PF3D7_1474000:organism=Plasmodium_falciparum_3D7:gene_product=probable_protein__unknown_function:transcript_product=probable_protein__unknown_function:location=Pf3D7_14_v3:3011585-3017899(-):protein_length=2104:sequence_SO=chromosome:SO=protein_coding_seq67', 'PFIT_0518700.1-p1:transcript=PFIT_0518700.1:gene=PFIT_0518700:organism=Plasmodium_fal…
KEEELKR	{'PF3D7_1335400.1-p1:transcript=PF3D7_1335400.1:gene=PF3D7_1335400:organism=Plasmodium_falciparum_3D7:gene_product=reticulocyte_binding_protein_2_homologue_a:transcript_product=reticulocyte_binding_protein_2_homologue_a:location=Pf3D7_13_v3:1440779-1450385(+):protein_length=3130:sequence_SO=chromosome:SO=protein_coding_seq110', 'PF3D7_1335400.1-p1:transcript=PF3D7_1335400.1:gene=PF3D7_1335400:org…
IEEDIKE	{'PF3D7_0715200.1-p1:transcript=PF3D7_0715200.1:gene=PF3D7_0715200:organism=Plasmodium_falciparum_3D7:gene_product=conserved_Plasmodium_protein__unknown_function:transcript_product=conserved_Plasmodium_protein__unknown_function:location=Pf3D7_07_v3:676061-682681(-):protein_length=2206:sequence_SO=chromosome:SO=protein_coding_seq21', 'PFIT_0713300.1-p1:transcript=PFIT_0713300.1:gene=PFIT_0713300:o…
EEEITTK	{'PF3D7_0930300.1-p1:transcript=PF3D7_0930300.1:gene=PF3D7_0930300:organism=Plasmodium_falciparum_3D7:gene_product=merozoite_surface_protein_1:transcript_product=merozoite_surface_protein_1:location=Pf3D7_09_v3:1201812-1206974(+):protein_length=1720:sequence_SO=chromosome:SO=protein_coding_seq3', 'Plasmodiumfalciparum_AMA1_[K1_allele]_full-length_seq2', 'PF3D7_0930300.1-p1:transcript=PF3D7_093030…
DLEKQKY	{'PF3D7_1149200.1-p1:transcript=PF3D7_1149200.1:gene=PF3D7_1149200:organism=Plasmodium_falciparum_3D7:gene_product=ring-infected_erythrocyte_surface_antigen:transcript_product=ring-infected_erythrocyte_surface_antigen:location=Pf3D7_11_v3:1976407-1979804(+):protein_length=1090:sequence_SO=chromosome:SO=protein_coding_seq17', 'PF3D7_0102200.1-p1:transcript=PF3D7_0102200.1:gene=PF3D7_0102200:organi…
EKKNEIK	{"PF3D7_1100800.1-p1:transcript=PF3D7_1100800.1:gene=PF3D7_1100800:organism=Plasmodium_falciparum_3D7:gene_product=Pfmc-2TM_Maurer's_cleft_two_transmembrane_protein:transcript_product=Pfmc-2TM_Maurer's_cleft_two_transmembrane_protein:location=Pf3D7_11_v3:59550-60328(+):protein_length=231:sequence_SO=chromosome:SO=protein_coding_seq3", 'MAL6P1.316_D5_seq8', "PF3D7_1100800.1-p1:transcript=PF3D7_110…
ALYTDED	{'PF3D7_1149200.1-p1:transcript=PF3D7_1149200.1:gene=PF3D7_1149200:organism=Plasmodium_falciparum_3D7:gene_product=ring-infected_erythrocyte_surface_antigen:transcript_product=ring-infected_erythrocyte_surface_antigen:location=Pf3D7_11_v3:1976407-1979804(+):protein_length=1090:sequence_SO=chromosome:SO=protein_coding_seq17', 'PF3D7_0102200.1-p1:transcript=PF3D7_0102200.1:gene=PF3D7_0102200:organi…
EKNEKNE	{'PF3D7_1417200.1-p1:transcript=PF3D7_1417200.1:gene=PF3D7_1417200:organism=Plasmodium_falciparum_3D7:gene_product=NOT_family_protein__putative:transcript_product=NOT_family_protein__putative:location=Pf3D7_14_v3:694585-708177(+):protein_length=4466:sequence_SO=chromosome:SO=protein_coding_seq45', 'PF3D7_1417200.1-p1:transcript=PF3D7_1417200.1:gene=PF3D7_1417200:organism=Plasmodium_falciparum_3D7…
ENEKNEK	{'PF3D7_0313400.1-p1:transcript=PF3D7_0313400.1:gene=PF3D7_0313400:organism=Plasmodium_falciparum_3D7:gene_product=conserved_Plasmodium_protein__unknown_function:transcript_product=conserved_Plasmodium_protein__unknown_function:location=Pf3D7_03_v3:545828-548182(-):protein_length=784:sequence_SO=chromosome:SO=protein_coding_seq7', 'PFIT_1143800.1-p1:transcript=PFIT_1143800.1:gene=PFIT_1143800:org…
TEDVEEV|TEEVEEV	{'PF3D7_1149000.1-p1:transcript=PF3D7_1149000.1:gene=PF3D7_1149000:organism=Plasmodium_falciparum_3D7:gene_product=antigen_332__DBL-like_protein:transcript_product=antigen_332__DBL-like_protein:location=Pf3D7_11_v3:1950210-1968726(+):protein_length=6093:sequence_SO=chromosome:SO=protein_coding_seq208', 'PF3D7_1038400.1-p1:transcript=PF3D7_1038400.1:gene=PF3D7_1038400:organism=Plasmodium_falciparu…
PRSNTSS	{'Plasmodiumfalciparum_AMA1_[K1_allele]_full-length_seq4', 'PF3D7_0930300.1-p1:transcript=PF3D7_0930300.1:gene=PF3D7_0930300:organism=Plasmodium_falciparum_3D7:gene_product=merozoite_surface_protein_1:transcript_product=merozoite_surface_protein_1:location=Pf3D7_09_v3:1201812-1206974(+):protein_length=1720:sequence_SO=chromosome:SO=protein_coding_seq5', 'PF3D7_0930300.1-p1:transcript=PF3D7_093030…
VKNEVKS	{'PF3D7_0401900.1-p1:transcript=PF3D7_0401900.1:gene=PF3D7_0401900:organism=Plasmodium_falciparum_3D7:gene_product=acyl-CoA_synthetase:transcript_product=acyl-CoA_synthetase:location=Pf3D7_04_v3:108380-111295(-):protein_length=971:sequence_SO=chromosome:SO=protein_coding_seq33', 'PF3D7_0401900.1-p1:transcript=PF3D7_0401900.1:gene=PF3D7_0401900:organism=Plasmodium_falciparum_3D7:gene_product=acyl-…
EKTNEKT	{'PFIT_0909100.1-p1:transcript=PFIT_0909100.1:gene=PFIT_0909100:organism=Plasmodium_falciparum_IT:gene_product=conserved_Plasmodium_protein__unknown_function:transcript_product=conserved_Plasmodium_protein__unknown_function:location=PfIT_09_v3:389109-392246(-):protein_length=993:sequence_SO=chromosome:SO=protein_coding_seq13', 'PF3D7_0604500.1-p1:transcript=PF3D7_0604500.1:gene=PF3D7_0604500:orga…
DLNNNDS	{'PF3D7_0509400.1-p1:transcript=PF3D7_0509400.1:gene=PF3D7_0509400:organism=Plasmodium_falciparum_3D7:gene_product=RNA_polymerase_I:transcript_product=RNA_polymerase_I:location=Pf3D7_05_v3:389914-398997(-):protein_length=2914:sequence_SO=chromosome:SO=protein_coding_seq40', 'PF3D7_1035300.1-p1:transcript=PF3D7_1035300.1:gene=PF3D7_1035300:organism=Plasmodium_falciparum_3D7:gene_product=glutamate-…
NNKDNKN	{'PF3D7_0424700.1-p1:transcript=PF3D7_0424700.1:gene=PF3D7_0424700:organism=Plasmodium_falciparum_3D7:gene_product=serine/threonine_protein_kinase__FIKK_family:transcript_product=serine/threonine_protein_kinase__FIKK_family:location=Pf3D7_04_v3:1118430-1122414(+):protein_length=1222:sequence_SO=chromosome:SO=protein_coding_seq37', 'PF3D7_1475200.1-p1:transcript=PF3D7_1475200.1:gene=PF3D7_1475200:…
DDIKNDD	{'PF3D7_0629700.1-p1:transcript=PF3D7_0629700.1:gene=PF3D7_0629700:organism=Plasmodium_falciparum_3D7:gene_product=SET_domain_protein__putative:transcript_product=SET_domain_protein__putative:location=Pf3D7_06_v3:1221941-1242922(+):protein_length=6753:sequence_SO=chromosome:SO=protein_coding_seq63', 'PF3D7_1359700.1-p1:transcript=PF3D7_1359700.1:gene=PF3D7_1359700:organism=Plasmodium_falciparum_3…
NNNNKKN	{'PF3D7_1324300.1-p1:transcript=PF3D7_1324300.1:gene=PF3D7_1324300:organism=Plasmodium_falciparum_3D7:gene_product=conserved_Plasmodium_membrane_protein__unknown_function:transcript_product=conserved_Plasmodium_membrane_protein__unknown_function:location=Pf3D7_13_v3:1002748-1019303(-):protein_length=5415:sequence_SO=chromosome:SO=protein_coding_seq74', 'PF3D7_1324300.1-p1:transcript=PF3D7_1324300…
DKQKNSI|EKQKNSI	{'PFIT_1206800.1-p1:transcript=PFIT_1206800.1:gene=PFIT_1206800:organism=Plasmodium_falciparum_IT:gene_product=conserved_Plasmodium_protein__unknown_function:transcript_product=conserved_Plasmodium_protein__unknown_function:location=PfIT_12_v3:284255-292450(-):protein_length=2731:sequence_SO=chromosome:SO=protein_coding_seq89', 'PFIT_1206800.1-p1:transcript=PFIT_1206800.1:gene=PFIT_1206800:organi…
SEKLNHS	{'PF3D7_0220100.1-p1:transcript=PF3D7_0220100.1:gene=PF3D7_0220100:organism=Plasmodium_falciparum_3D7:gene_product=DnaJ_protein__putative:transcript_product=DnaJ_protein__putative:location=Pf3D7_02_v3:804520-807741(+):protein_length=997:sequence_SO=chromosome:SO=protein_coding_seq20', 'PF3D7_0220100.1-p1:transcript=PF3D7_0220100.1:gene=PF3D7_0220100:organism=Plasmodium_falciparum_3D7:gene_product…
NMNNIDN|NMNNIEN	{'PF3D7_1120600.1-p1:transcript=PF3D7_1120600.1:gene=PF3D7_1120600:organism=Plasmodium_falciparum_3D7:gene_product=conserved_Plasmodium_protein__unknown_function:transcript_product=conserved_Plasmodium_protein__unknown_function:location=Pf3D7_11_v3:775233-783639(-):protein_length=2545:sequence_SO=chromosome:SO=protein_coding_seq82', 'PF3D7_1221900.1-p1:transcript=PF3D7_1221900.1:gene=PF3D7_122190…
KEDIIEE	{'PF3D7_0715200.1-p1:transcript=PF3D7_0715200.1:gene=PF3D7_0715200:organism=Plasmodium_falciparum_3D7:gene_product=conserved_Plasmodium_protein__unknown_function:transcript_product=conserved_Plasmodium_protein__unknown_function:location=Pf3D7_07_v3:676061-682681(-):protein_length=2206:sequence_SO=chromosome:SO=protein_coding_seq19', 'PF3D7_0715200.1-p1:transcript=PF3D7_0715200.1:gene=PF3D7_071520…
NKENMNH|NKENMNK	{'PF3D7_1352800.1-p1:transcript=PF3D7_1352800.1:gene=PF3D7_1352800:organism=Plasmodium_falciparum_3D7:gene_product=vacuolar_fusion_protein_MON1__putative:transcript_product=vacuolar_fusion_protein_MON1__putative:location=Pf3D7_13_v3:2110352-2113356(+):protein_length=884:sequence_SO=chromosome:SO=protein_coding_seq14', 'PF3D7_0612200.1-p1:transcript=PF3D7_0612200.1:gene=PF3D7_0612200:organism=Plas…
NEKNEKH|NEKNEKK	{'PF3D7_0721000.1-p1:transcript=PF3D7_0721000.1:gene=PF3D7_0721000:organism=Plasmodium_falciparum_3D7:gene_product=conserved_Plasmodium_membrane_protein__unknown_function:transcript_product=conserved_Plasmodium_membrane_protein__unknown_function:location=Pf3D7_07_v3:904143-914671(+):protein_length=3459:sequence_SO=chromosome:SO=protein_coding_seq112', 'PF3D7_0507800.1-p1:transcript=PF3D7_0507800.…
TSADPEG	{'PF3D7_1016300.1-p1:transcript=PF3D7_1016300.1:gene=PF3D7_1016300:organism=Plasmodium_falciparum_3D7:gene_product=glycophorin_binding_protein:transcript_product=glycophorin_binding_protein:location=Pf3D7_10_v3:650898-653567(-):protein_length=824:sequence_SO=chromosome:SO=protein_coding_seq31', 'PF3D7_1016300.1-p1:transcript=PF3D7_1016300.1:gene=PF3D7_1016300:organism=Plasmodium_falciparum_3D7:ge…
IQNDAIP|IQNDGIP	{'PF3D7_1240300.1-p1:transcript=PF3D7_1240300.1:gene=PF3D7_1240300:organism=Plasmodium_falciparum_3D7:gene_product=erythrocyte_membrane_protein_1__PfEMP1:transcript_product=erythrocyte_membrane_protein_1__PfEMP1:location=Pf3D7_12_v3:1694150-1703087(+):protein_length=2646:sequence_SO=chromosome:SO=protein_coding_seq93', 'MAL7P1.56_D6_seq6', 'PFIT_0900200.1-p1:transcript=PFIT_0900200.1:gene=PFIT_09…
IQSDAIP|IQSDGIP	{'PF3D7_0100900.1-p1:transcript=PF3D7_0100900.1:gene=PF3D7_0100900:organism=Plasmodium_falciparum_3D7:gene_product=rifin:transcript_product=rifin:location=Pf3D7_01_v3:62187-63400(-):protein_length=350:sequence_SO=chromosome:SO=protein_coding_seq5', 'PF3D7_1040500.1-p1:transcript=PF3D7_1040500.1:gene=PF3D7_1040500:organism=Plasmodium_falciparum_3D7:gene_product=rifin:transcript_product=rifin:locat…
DNKSGDD	{'PFIT_1105400.1-p1:transcript=PFIT_1105400.1:gene=PFIT_1105400:organism=Plasmodium_falciparum_IT:gene_product=radial_spoke_head_protein__putative:transcript_product=radial_spoke_head_protein__putative:location=PfIT_11_v3:135836-137785(+):protein_length=649:sequence_SO=chromosome:SO=protein_coding_seq11', 'PF3D7_0507800.1-p1:transcript=PF3D7_0507800.1:gene=PF3D7_0507800:organism=Plasmodium_falcip…
EDIEEDV	{'PF3D7_0220000.1-p1:transcript=PF3D7_0220000.1:gene=PF3D7_0220000:organism=Plasmodium_falciparum_3D7:gene_product=liver_stage_antigen_3:transcript_product=liver_stage_antigen_3:location=Pf3D7_02_v3:796752-801586(+):protein_length=1558:sequence_SO=chromosome:SO=protein_coding_seq52', 'PF3D7_0220000.1-p1:transcript=PF3D7_0220000.1:gene=PF3D7_0220000:organism=Plasmodium_falciparum_3D7:gene_product=…
RELIKKD|RELIKKE	{'PF3D7_1002000.1-p1:transcript=PF3D7_1002000.1:gene=PF3D7_1002000:organism=Plasmodium_falciparum_3D7:gene_product=Plasmodium_exported_protein_(hyp2)__unknown_function:transcript_product=Plasmodium_exported_protein_(hyp2)__unknown_function:location=Pf3D7_10_v3:103118-104683(-):protein_length=469:sequence_SO=chromosome:SO=protein_coding_seq14', 'PF3D7_1002000.1-p1:transcript=PF3D7_1002000.1:gene=P…
NNKEKDD	{'PFIT_1228500.1-p1:transcript=PFIT_1228500.1:gene=PFIT_1228500:organism=Plasmodium_falciparum_IT:gene_product=conserved_Plasmodium_protein__unknown_function:transcript_product=conserved_Plasmodium_protein__unknown_function:location=PfIT_12_v3:1121130-1130633(-):protein_length=3167:sequence_SO=chromosome:SO=protein_coding_seq78', 'PFIT_1228500.1-p1:transcript=PFIT_1228500.1:gene=PFIT_1228500:orga…
VEEKNLS|VEEKNVS	{'PF3D7_0113000.1-p1:transcript=PF3D7_0113000.1:gene=PF3D7_0113000:organism=Plasmodium_falciparum_3D7:gene_product=glutamic_acid-rich_protein:transcript_product=glutamic_acid-rich_protein:location=Pf3D7_01_v3:487892-490127(-):protein_length=673:sequence_SO=chromosome:SO=protein_coding_seq20', 'PF3D7_1149000.1-p1:transcript=PF3D7_1149000.1:gene=PF3D7_1149000:organism=Plasmodium_falciparum_3D7:gene…
NDDIKND|NDDIRND	{'PF3D7_0629700.1-p1:transcript=PF3D7_0629700.1:gene=PF3D7_0629700:organism=Plasmodium_falciparum_3D7:gene_product=SET_domain_protein__putative:transcript_product=SET_domain_protein__putative:location=Pf3D7_06_v3:1221941-1242922(+):protein_length=6753:sequence_SO=chromosome:SO=protein_coding_seq63', 'PF3D7_1359700.1-p1:transcript=PF3D7_1359700.1:gene=PF3D7_1359700:organism=Plasmodium_falciparum_3…
DNIEINN|DNIEVNN	{'PF3D7_1120600.1-p1:transcript=PF3D7_1120600.1:gene=PF3D7_1120600:organism=Plasmodium_falciparum_3D7:gene_product=conserved_Plasmodium_protein__unknown_function:transcript_product=conserved_Plasmodium_protein__unknown_function:location=Pf3D7_11_v3:775233-783639(-):protein_length=2545:sequence_SO=chromosome:SO=protein_coding_seq47', 'PF3D7_1002000.1-p1:transcript=PF3D7_1002000.1:gene=PF3D7_100200…
EKNMKNM	{'PF3D7_1143100.1-p1:transcript=PF3D7_1143100.1:gene=PF3D7_1143100:organism=Plasmodium_falciparum_3D7:gene_product=AP2_domain_transcription_factor_AP2-O__putative:transcript_product=AP2_domain_transcription_factor_AP2-O__putative:location=Pf3D7_11_v3:1720047-1724861(-):protein_length=1604:sequence_SO=chromosome:SO=protein_coding_seq27', 'PFIT_1143800.1-p1:transcript=PFIT_1143800.1:gene=PFIT_11438…
GQIMKAW|GQIMKAY	{'PF3D7_1401000.1-p1:transcript=PF3D7_1401000.1:gene=PF3D7_1401000:organism=Plasmodium_falciparum_3D7:gene_product=glycophorin_binding_protein:transcript_product=glycophorin_binding_protein:location=Pf3D7_14_v3:34693-35773(-):protein_length=307:sequence_SO=chromosome:SO=protein_coding_seq11', 'PF3D7_1401000.1-p1:transcript=PF3D7_1401000.1:gene=PF3D7_1401000:organism=Plasmodium_falciparum_3D7:gene…
NKKNNNN	{'PF3D7_1324300.1-p1:transcript=PF3D7_1324300.1:gene=PF3D7_1324300:organism=Plasmodium_falciparum_3D7:gene_product=conserved_Plasmodium_membrane_protein__unknown_function:transcript_product=conserved_Plasmodium_membrane_protein__unknown_function:location=Pf3D7_13_v3:1002748-1019303(-):protein_length=5415:sequence_SO=chromosome:SO=protein_coding_seq74', 'PF3D7_0713900.1-p1:transcript=PF3D7_0713900…
ETESIKD|ETESIKE	{'PF3D7_1149000.1-p1:transcript=PF3D7_1149000.1:gene=PF3D7_1149000:organism=Plasmodium_falciparum_3D7:gene_product=antigen_332__DBL-like_protein:transcript_product=antigen_332__DBL-like_protein:location=Pf3D7_11_v3:1950210-1968726(+):protein_length=6093:sequence_SO=chromosome:SO=protein_coding_seq174', 'PF3D7_0220000.1-p1:transcript=PF3D7_0220000.1:gene=PF3D7_0220000:organism=Plasmodium_falciparu…
ASPPADA	{'Plasmodiumfalciparum_AMA1_[K1_allele]_full-length_seq4', 'PF3D7_0930300.1-p1:transcript=PF3D7_0930300.1:gene=PF3D7_0930300:organism=Plasmodium_falciparum_3D7:gene_product=merozoite_surface_protein_1:transcript_product=merozoite_surface_protein_1:location=Pf3D7_09_v3:1201812-1206974(+):protein_length=1720:sequence_SO=chromosome:SO=protein_coding_seq5', 'PF3D7_0930300.1-p1:transcript=PF3D7_093030…
HEKNNLN|KEKNNLN	{'PF3D7_1467600.1-p1:transcript=PF3D7_1467600.1:gene=PF3D7_1467600:organism=Plasmodium_falciparum_3D7:gene_product=conserved_Plasmodium_protein__unknown_function:transcript_product=conserved_Plasmodium_protein__unknown_function:location=Pf3D7_14_v3:2757665-2764150(-):protein_length=2104:sequence_SO=chromosome:SO=protein_coding_seq17', 'PF3D7_0308900.1-p1:transcript=PF3D7_0308900.1:gene=PF3D7_0308…
ERLEKAK	{'PF3D7_1335400.1-p1:transcript=PF3D7_1335400.1:gene=PF3D7_1335400:organism=Plasmodium_falciparum_3D7:gene_product=reticulocyte_binding_protein_2_homologue_a:transcript_product=reticulocyte_binding_protein_2_homologue_a:location=Pf3D7_13_v3:1440779-1450385(+):protein_length=3130:sequence_SO=chromosome:SO=protein_coding_seq106', 'PF3D7_1335300.1-p1:transcript=PF3D7_1335300.1:gene=PF3D7_1335300:org…
DEIIKND	{'PF3D7_1125700.1-p1:transcript=PF3D7_1125700.1:gene=PF3D7_1125700:organism=Plasmodium_falciparum_3D7:gene_product=kelch_domain-containing_protein__putative:transcript_product=kelch_domain-containing_protein__putative:location=Pf3D7_11_v3:1004780-1007354(-):protein_length=669:sequence_SO=chromosome:SO=protein_coding_seq24', 'PF3D7_1125700.1-p1:transcript=PF3D7_1125700.1:gene=PF3D7_1125700:organis…
KENNENN	{'PFIT_0920700.1-p1:transcript=PFIT_0920700.1:gene=PFIT_0920700:organism=Plasmodium_falciparum_IT:gene_product=conserved_Plasmodium_protein__unknown_function:transcript_product=conserved_Plasmodium_protein__unknown_function:location=PfIT_09_v3:824139-828221(+):protein_length=1360:sequence_SO=chromosome:SO=protein_coding_seq6', 'PF3D7_0419900.1-p1:transcript=PF3D7_0419900.1:gene=PF3D7_0419900:orga…
KENLKED|KENVKED	{'PFIT_0713300.1-p1:transcript=PFIT_0713300.1:gene=PFIT_0713300:organism=Plasmodium_falciparum_IT:gene_product=conserved_Plasmodium_protein__unknown_function:transcript_product=conserved_Plasmodium_protein__unknown_function:location=PfIT_07_v3:662284-668904(-):protein_length=2206:sequence_SO=chromosome:SO=protein_coding_seq20', 'PF3D7_0307900.1-p1:transcript=PF3D7_0307900.1:gene=PF3D7_0307900:org…
DNNNKYN	{'PF3D7_0803100.1-p1:transcript=PF3D7_0803100.1:gene=PF3D7_0803100:organism=Plasmodium_falciparum_3D7:gene_product=U3_small_nucleolar_RNA-associated_protein_14__putative:transcript_product=U3_small_nucleolar_RNA-associated_protein_14__putative:location=Pf3D7_08_v3:199181-202918(-):protein_length=1245:sequence_SO=chromosome:SO=protein_coding_seq32', 'PF3D7_0803100.1-p1:transcript=PF3D7_0803100.1:g…
IKNMKNV|LKNMKNV	{'PF3D7_0407800.1-p1:transcript=PF3D7_0407800.1:gene=PF3D7_0407800:organism=Plasmodium_falciparum_3D7:gene_product=conserved_Plasmodium_protein__unknown_function:transcript_product=conserved_Plasmodium_protein__unknown_function:location=Pf3D7_04_v3:384924-390806(+):protein_length=1960:sequence_SO=chromosome:SO=protein_coding_seq38', 'PF3D7_0723400.1-p1:transcript=PF3D7_0723400.1:gene=PF3D7_072340…
EEVKKVI	{'PF3D7_0500800.1-p1:transcript=PF3D7_0500800.1:gene=PF3D7_0500800:organism=Plasmodium_falciparum_3D7:gene_product=mature_parasite-infected_erythrocyte_surface_antigen:transcript_product=mature_parasite-infected_erythrocyte_surface_antigen:location=Pf3D7_05_v3:43327-47761(-):protein_length=1434:sequence_SO=chromosome:SO=protein_coding_seq30', 'PF3D7_0500800.1-p1:transcript=PF3D7_0500800.1:gene=PF…
DNINKKD|ENINKKD	{'PF3D7_1350700.1-p1:transcript=PF3D7_1350700.1:gene=PF3D7_1350700:organism=Plasmodium_falciparum_3D7:gene_product=N6-adenine-specific_methylase__putative:transcript_product=N6-adenine-specific_methylase__putative:location=Pf3D7_13_v3:2023259-2024944(+):protein_length=561:sequence_SO=chromosome:SO=protein_coding_seq9', 'PFIT_0830600.1-p1:transcript=PFIT_0830600.1:gene=PFIT_0830600:organism=Plasmo…
SHNNNDI	{'PF3D7_1335400.1-p1:transcript=PF3D7_1335400.1:gene=PF3D7_1335400:organism=Plasmodium_falciparum_3D7:gene_product=reticulocyte_binding_protein_2_homologue_a:transcript_product=reticulocyte_binding_protein_2_homologue_a:location=Pf3D7_13_v3:1440779-1450385(+):protein_length=3130:sequence_SO=chromosome:SO=protein_coding_seq106', 'PF3D7_1335300.1-p1:transcript=PF3D7_1335300.1:gene=PF3D7_1335300:org…
ENKDDNK|EQKDDNK	{'PF3D7_0505700.1-p1:transcript=PF3D7_0505700.1:gene=PF3D7_0505700:organism=Plasmodium_falciparum_3D7:gene_product=conserved_Plasmodium_membrane_protein__unknown_function:transcript_product=conserved_Plasmodium_membrane_protein__unknown_function:location=Pf3D7_05_v3:247801-250575(-):protein_length=924:sequence_SO=chromosome:SO=protein_coding_seq9', 'PF3D7_0725100.1-p1:transcript=PF3D7_0725100.1:g…
ADASDSD	{'Plasmodiumfalciparum_AMA1_[K1_allele]_full-length_seq4', 'PF3D7_0930300.1-p1:transcript=PF3D7_0930300.1:gene=PF3D7_0930300:organism=Plasmodium_falciparum_3D7:gene_product=merozoite_surface_protein_1:transcript_product=merozoite_surface_protein_1:location=Pf3D7_09_v3:1201812-1206974(+):protein_length=1720:sequence_SO=chromosome:SO=protein_coding_seq5', 'PF3D7_0930300.1-p1:transcript=PF3D7_093030…
MKNEKND|MKNEKNE	{'PF3D7_1229600.1-p1:transcript=PF3D7_1229600.1:gene=PF3D7_1229600:organism=Plasmodium_falciparum_3D7:gene_product=conserved_Plasmodium_protein__unknown_function:transcript_product=conserved_Plasmodium_protein__unknown_function:location=Pf3D7_12_v3:1214043-1217715(-):protein_length=1163:sequence_SO=chromosome:SO=protein_coding_seq23', 'PF3D7_0308900.1-p1:transcript=PF3D7_0308900.1:gene=PF3D7_0308…
NVEENVE	{'PF3D7_1149200.1-p1:transcript=PF3D7_1149200.1:gene=PF3D7_1149200:organism=Plasmodium_falciparum_3D7:gene_product=ring-infected_erythrocyte_surface_antigen:transcript_product=ring-infected_erythrocyte_surface_antigen:location=Pf3D7_11_v3:1976407-1979804(+):protein_length=1090:sequence_SO=chromosome:SO=protein_coding_seq38', 'PF3D7_1149200.1-p1:transcript=PF3D7_1149200.1:gene=PF3D7_1149200:organi…
DSSKSSG|DSSKTSG	{'PFIT_0112000.1-p1:transcript=PFIT_0112000.1:gene=PFIT_0112000:organism=Plasmodium_falciparum_IT:gene_product=surface-associated_interspersed_protein_1.2_(SURFIN_1.2):transcript_product=surface-associated_interspersed_protein_1.2_(SURFIN_1.2):location=PfIT_01_v3:454288-460712(+):protein_length=2109:sequence_SO=chromosome:SO=protein_coding_seq28', 'PF3D7_0714600.1-p1:transcript=PF3D7_0714600.1:ge…
NKNNNME|QKNNNME	{'PF3D7_0103300.1-p1:transcript=PF3D7_0103300.1:gene=PF3D7_0103300:organism=Plasmodium_falciparum_3D7:gene_product=conserved_Plasmodium_protein__unknown_function:transcript_product=conserved_Plasmodium_protein__unknown_function:location=Pf3D7_01_v3:143640-146396(-):protein_length=918:sequence_SO=chromosome:SO=protein_coding_seq21', 'PF3D7_0213900.1-p1:transcript=PF3D7_0213900.1:gene=PF3D7_0213900…
DDDDDSY	{'PF3D7_0511500.1-p1:transcript=PF3D7_0511500.1:gene=PF3D7_0511500:organism=Plasmodium_falciparum_3D7:gene_product=RNA_pseudouridylate_synthase__putative:transcript_product=RNA_pseudouridylate_synthase__putative:location=Pf3D7_05_v3:486602-516787(+):protein_length=10061:sequence_SO=chromosome:SO=protein_coding_seq89', 'PF3D7_0511500.1-p1:transcript=PF3D7_0511500.1:gene=PF3D7_0511500:organism=Plas…
NKDNIFN|NKDNIYN	{'PFIT_1423400.1-p1:transcript=PFIT_1423400.1:gene=PFIT_1423400:organism=Plasmodium_falciparum_IT:gene_product=conserved_Plasmodium_protein__unknown_function:transcript_product=conserved_Plasmodium_protein__unknown_function:location=PfIT_14_v3:928046-932965(+):protein_length=1639:sequence_SO=chromosome:SO=protein_coding_seq11', 'PF3D7_0525200.1-p1:transcript=PF3D7_0525200.1:gene=PF3D7_0525200:org…
NEKINDK	{'PF3D7_0811800.1-p1:transcript=PF3D7_0811800.1:gene=PF3D7_0811800:organism=Plasmodium_falciparum_3D7:gene_product=conserved_Plasmodium_protein__unknown_function:transcript_product=conserved_Plasmodium_protein__unknown_function:location=Pf3D7_08_v3:593649-595412(-):protein_length=587:sequence_SO=chromosome:SO=protein_coding_seq17', 'PF3D7_1444100.1-p1:transcript=PF3D7_1444100.1:gene=PF3D7_1444100…
ERKERER	{'PF3D7_1335300.1-p1:transcript=PF3D7_1335300.1:gene=PF3D7_1335300:organism=Plasmodium_falciparum_3D7:gene_product=reticulocyte_binding_protein_2_homologue_b:transcript_product=reticulocyte_binding_protein_2_homologue_b:location=Pf3D7_13_v3:1428874-1438852(-):protein_length=3254:sequence_SO=chromosome:SO=protein_coding_seq108', 'PF3D7_1335400.1-p1:transcript=PF3D7_1335400.1:gene=PF3D7_1335400:org…
IKEDIIK	{'PF3D7_0715200.1-p1:transcript=PF3D7_0715200.1:gene=PF3D7_0715200:organism=Plasmodium_falciparum_3D7:gene_product=conserved_Plasmodium_protein__unknown_function:transcript_product=conserved_Plasmodium_protein__unknown_function:location=Pf3D7_07_v3:676061-682681(-):protein_length=2206:sequence_SO=chromosome:SO=protein_coding_seq19', 'PF3D7_0715200.1-p1:transcript=PF3D7_0715200.1:gene=PF3D7_071520…
LNHSEKL	{'PF3D7_0220100.1-p1:transcript=PF3D7_0220100.1:gene=PF3D7_0220100:organism=Plasmodium_falciparum_3D7:gene_product=DnaJ_protein__putative:transcript_product=DnaJ_protein__putative:location=Pf3D7_02_v3:804520-807741(+):protein_length=997:sequence_SO=chromosome:SO=protein_coding_seq20', 'PF3D7_0220100.1-p1:transcript=PF3D7_0220100.1:gene=PF3D7_0220100:organism=Plasmodium_falciparum_3D7:gene_product…
VAEEIVE	{'PF3D7_1149000.1-p1:transcript=PF3D7_1149000.1:gene=PF3D7_1149000:organism=Plasmodium_falciparum_3D7:gene_product=antigen_332__DBL-like_protein:transcript_product=antigen_332__DBL-like_protein:location=Pf3D7_11_v3:1950210-1968726(+):protein_length=6093:sequence_SO=chromosome:SO=protein_coding_seq156', 'PF3D7_1149000.1-p1:transcript=PF3D7_1149000.1:gene=PF3D7_1149000:organism=Plasmodium_falciparu…
ENEKDIN|ENEKEIN	{'PF3D7_1417600.1-p1:transcript=PF3D7_1417600.1:gene=PF3D7_1417600:organism=Plasmodium_falciparum_3D7:gene_product=conserved_Plasmodium_protein__unknown_function:transcript_product=conserved_Plasmodium_protein__unknown_function:location=Pf3D7_14_v3:730694-744682(-):protein_length=4662:sequence_SO=chromosome:SO=protein_coding_seq55', 'PF3D7_1442600.1-p1:transcript=PF3D7_1442600.1:gene=PF3D7_144260…
NDNIDKN|NDNIEKN	{'PFIT_1036200.1-p1:transcript=PFIT_1036200.1:gene=PFIT_1036200:organism=Plasmodium_falciparum_IT:gene_product=DNA_polymerase_zeta_catalytic_subunit__putative:transcript_product=DNA_polymerase_zeta_catalytic_subunit__putative:location=PfIT_10_v3:1393016-1400289(+):protein_length=2245:sequence_SO=chromosome:SO=protein_coding_seq76', 'PF3D7_1312700.1-p1:transcript=PF3D7_1312700.1:gene=PF3D7_1312700…
LEKAKQE	{'PF3D7_1335300.1-p1:transcript=PF3D7_1335300.1:gene=PF3D7_1335300:organism=Plasmodium_falciparum_3D7:gene_product=reticulocyte_binding_protein_2_homologue_b:transcript_product=reticulocyte_binding_protein_2_homologue_b:location=Pf3D7_13_v3:1428874-1438852(-):protein_length=3254:sequence_SO=chromosome:SO=protein_coding_seq108', 'PF3D7_1335400.1-p1:transcript=PF3D7_1335400.1:gene=PF3D7_1335400:org…
QILNNTD	{'PF3D7_1401000.1-p1:transcript=PF3D7_1401000.1:gene=PF3D7_1401000:organism=Plasmodium_falciparum_3D7:gene_product=glycophorin_binding_protein:transcript_product=glycophorin_binding_protein:location=Pf3D7_14_v3:34693-35773(-):protein_length=307:sequence_SO=chromosome:SO=protein_coding_seq11', 'PF3D7_1401000.1-p1:transcript=PF3D7_1401000.1:gene=PF3D7_1401000:organism=Plasmodium_falciparum_3D7:gene…
KEDDNKK	{'PF3D7_1141700.1-p1:transcript=PF3D7_1141700.1:gene=PF3D7_1141700:organism=Plasmodium_falciparum_3D7:gene_product=OTU_domain-containing_protein__putative:transcript_product=OTU_domain-containing_protein__putative:location=Pf3D7_11_v3:1669951-1671512(+):protein_length=313:sequence_SO=chromosome:SO=protein_coding_seq2', 'PFIT_0102100.1-p1:transcript=PFIT_0102100.1:gene=PFIT_0102100:organism=Plasmo…
KNSSNNN|KNTSNNN	{'PFIT_0710900.1-p1:transcript=PFIT_0710900.1:gene=PFIT_0710900:organism=Plasmodium_falciparum_IT:gene_product=erythrocyte_membrane_protein_1__PfEMP1:transcript_product=erythrocyte_membrane_protein_1__PfEMP1:location=PfIT_07_v3:565906-575206(+):protein_length=2727:sequence_SO=chromosome:SO=protein_coding_seq102', 'PFCLINvar32_seq119', 'PFCLINvar32_seq120', 'DD2var52_seq103', 'PFCLINvar56_seq83', …
NDIKDLG	{'PF3D7_1335400.1-p1:transcript=PF3D7_1335400.1:gene=PF3D7_1335400:organism=Plasmodium_falciparum_3D7:gene_product=reticulocyte_binding_protein_2_homologue_a:transcript_product=reticulocyte_binding_protein_2_homologue_a:location=Pf3D7_13_v3:1440779-1450385(+):protein_length=3130:sequence_SO=chromosome:SO=protein_coding_seq106', 'PF3D7_1335300.1-p1:transcript=PF3D7_1335300.1:gene=PF3D7_1335300:org…
DDNKSGD	{'PFIT_1105400.1-p1:transcript=PFIT_1105400.1:gene=PFIT_1105400:organism=Plasmodium_falciparum_IT:gene_product=radial_spoke_head_protein__putative:transcript_product=radial_spoke_head_protein__putative:location=PfIT_11_v3:135836-137785(+):protein_length=649:sequence_SO=chromosome:SO=protein_coding_seq11', 'PF3D7_0507800.1-p1:transcript=PF3D7_0507800.1:gene=PF3D7_0507800:organism=Plasmodium_falcip…
NYSEKVN	{'PF3D7_0220100.1-p1:transcript=PF3D7_0220100.1:gene=PF3D7_0220100:organism=Plasmodium_falciparum_3D7:gene_product=DnaJ_protein__putative:transcript_product=DnaJ_protein__putative:location=Pf3D7_02_v3:804520-807741(+):protein_length=997:sequence_SO=chromosome:SO=protein_coding_seq17', 'PF3D7_0220100.1-p1:transcript=PF3D7_0220100.1:gene=PF3D7_0220100:organism=Plasmodium_falciparum_3D7:gene_product…
EEEKSVS	{'PF3D7_0909900.1-p1:transcript=PF3D7_0909900.1:gene=PF3D7_0909900:organism=Plasmodium_falciparum_3D7:gene_product=helicase_SKI2W__putative:transcript_product=helicase_SKI2W__putative:location=Pf3D7_09_v3:447928-452049(+):protein_length=1373:sequence_SO=chromosome:SO=protein_coding_seq2', 'PF3D7_1149000.1-p1:transcript=PF3D7_1149000.1:gene=PF3D7_1149000:organism=Plasmodium_falciparum_3D7:gene_pro…
KDDNYNI	{'PFIT_1228500.1-p1:transcript=PFIT_1228500.1:gene=PFIT_1228500:organism=Plasmodium_falciparum_IT:gene_product=conserved_Plasmodium_protein__unknown_function:transcript_product=conserved_Plasmodium_protein__unknown_function:location=PfIT_12_v3:1121130-1130633(-):protein_length=3167:sequence_SO=chromosome:SO=protein_coding_seq78', 'PFIT_1228500.1-p1:transcript=PFIT_1228500.1:gene=PFIT_1228500:orga…
TLPRSNT	{'Plasmodiumfalciparum_AMA1_[K1_allele]_full-length_seq4', 'PF3D7_0930300.1-p1:transcript=PF3D7_0930300.1:gene=PF3D7_0930300:organism=Plasmodium_falciparum_3D7:gene_product=merozoite_surface_protein_1:transcript_product=merozoite_surface_protein_1:location=Pf3D7_09_v3:1201812-1206974(+):protein_length=1720:sequence_SO=chromosome:SO=protein_coding_seq5', 'PF3D7_0930300.1-p1:transcript=PF3D7_093030…
INGNMQN	{'PF3D7_0322700.1-p1:transcript=PF3D7_0322700.1:gene=PF3D7_0322700:organism=Plasmodium_falciparum_3D7:gene_product=conserved_Plasmodium_protein__unknown_function:transcript_product=conserved_Plasmodium_protein__unknown_function:location=Pf3D7_03_v3:952964-962367(-):protein_length=3096:sequence_SO=chromosome:SO=protein_coding_seq106', 'PF3D7_0322700.1-p1:transcript=PF3D7_0322700.1:gene=PF3D7_03227…
KNSKSKN|KNSRSKN	{'PF3D7_0830500.1-p1:transcript=PF3D7_0830500.1:gene=PF3D7_0830500:organism=Plasmodium_falciparum_3D7:gene_product=sporozoite_and_liver_stage_tryptophan-rich_protein__putative:transcript_product=sporozoite_and_liver_stage_tryptophan-rich_protein__putative:location=Pf3D7_08_v3:1296134-1298328(-):protein_length=675:sequence_SO=chromosome:SO=protein_coding_seq5', 'PF3D7_1209300.1-p1:transcript=PF3D7…
NNKNNNN	{'PF3D7_1028400.1-p1:transcript=PF3D7_1028400.1:gene=PF3D7_1028400:organism=Plasmodium_falciparum_3D7:gene_product=nucleolar_preribosomal_assembly_protein__putative:transcript_product=nucleolar_preribosomal_assembly_protein__putative:location=Pf3D7_10_v3:1169940-1171391(+):protein_length=483:sequence_SO=chromosome:SO=protein_coding_seq13', 'PF3D7_0713500.1-p1:transcript=PF3D7_0713500.1:gene=PF3D7…
NKNGDNN	{'PF3D7_0728200.1-p1:transcript=PF3D7_0728200.1:gene=PF3D7_0728200:organism=Plasmodium_falciparum_3D7:gene_product=actin-like_protein__putative:transcript_product=actin-like_protein__putative:location=Pf3D7_07_v3:1211657-1213517(+):protein_length=552:sequence_SO=chromosome:SO=protein_coding_seq13', 'PF3D7_1249100.1-p1:transcript=PF3D7_1249100.1:gene=PF3D7_1249100:organism=Plasmodium_falciparum_3D…
ITTKGAS	{'PF3D7_0930300.1-p1:transcript=PF3D7_0930300.1:gene=PF3D7_0930300:organism=Plasmodium_falciparum_3D7:gene_product=merozoite_surface_protein_1:transcript_product=merozoite_surface_protein_1:location=Pf3D7_09_v3:1201812-1206974(+):protein_length=1720:sequence_SO=chromosome:SO=protein_coding_seq3', 'Plasmodiumfalciparum_AMA1_[K1_allele]_full-length_seq2', 'PF3D7_0930300.1-p1:transcript=PF3D7_093030…
MENNDDK	{'PFIT_1120200.1-p1:transcript=PFIT_1120200.1:gene=PFIT_1120200:organism=Plasmodium_falciparum_IT:gene_product=ubiquitin-protein_ligase__putative:transcript_product=ubiquitin-protein_ligase__putative:location=PfIT_11_v3:660584-666901(+):protein_length=2105:sequence_SO=chromosome:SO=protein_coding_seq75', 'PFIT_1469000.1-p1:transcript=PFIT_1469000.1:gene=PFIT_1469000:organism=Plasmodium_falciparum…
SKAHEKK|SKGHEKK	{'PF3D7_0202000.1-p1:transcript=PF3D7_0202000.1:gene=PF3D7_0202000:organism=Plasmodium_falciparum_3D7:gene_product=knob-associated_histidine-rich_protein:transcript_product=knob-associated_histidine-rich_protein:location=Pf3D7_02_v3:103385-105796(-):protein_length=654:sequence_SO=chromosome:SO=protein_coding_seq18', 'PF3D7_0202000.1-p1:transcript=PF3D7_0202000.1:gene=PF3D7_0202000:organism=Plasmo…
RKKKEEK	{'IGHvar26_seq58', 'PF11_0008_D4_seq9', 'HB3var03_seq59', 'HB3var03_seq58', 'IGHvar26_seq57', 'IGHvar30_seq39', 'PF3D7_0113000.1-p1:transcript=PF3D7_0113000.1:gene=PF3D7_0113000:organism=Plasmodium_falciparum_3D7:gene_product=glutamic_acid-rich_protein:transcript_product=glutamic_acid-rich_protein:location=Pf3D7_01_v3:487892-490127(-):protein_length=673:sequence_SO=chromosome:SO=protein_coding_se…
KSGDDNK	{'PF3D7_0507800.1-p1:transcript=PF3D7_0507800.1:gene=PF3D7_0507800:organism=Plasmodium_falciparum_3D7:gene_product=conserved_Plasmodium_protein__unknown_function:transcript_product=conserved_Plasmodium_protein__unknown_function:location=Pf3D7_05_v3:322239-326822(+):protein_length=1527:sequence_SO=chromosome:SO=protein_coding_seq41', 'PFIT_1105400.1-p1:transcript=PFIT_1105400.1:gene=PFIT_1105400:o…
EALKRQE	{'PF3D7_1335400.1-p1:transcript=PF3D7_1335400.1:gene=PF3D7_1335400:organism=Plasmodium_falciparum_3D7:gene_product=reticulocyte_binding_protein_2_homologue_a:transcript_product=reticulocyte_binding_protein_2_homologue_a:location=Pf3D7_13_v3:1440779-1450385(+):protein_length=3130:sequence_SO=chromosome:SO=protein_coding_seq110', 'PF3D7_1335400.1-p1:transcript=PF3D7_1335400.1:gene=PF3D7_1335400:org…
EEKINND	{'PFIT_1419900.1-p1:transcript=PFIT_1419900.1:gene=PFIT_1419900:organism=Plasmodium_falciparum_IT:gene_product=DEAD/DEAH_box_ATP-dependent_RNA_helicase__putative:transcript_product=DEAD/DEAH_box_ATP-dependent_RNA_helicase__putative:location=PfIT_14_v3:811096-813841(-):protein_length=878:sequence_SO=chromosome:SO=protein_coding_seq2', 'PF3D7_0510000.1-p1:transcript=PF3D7_0510000.1:gene=PF3D7_05100…
KNDVKGE|KNEVKGE	{'PF3D7_1133900.1-p1:transcript=PF3D7_1133900.1:gene=PF3D7_1133900:organism=Plasmodium_falciparum_3D7:gene_product=conserved_Plasmodium_protein__unknown_function:transcript_product=conserved_Plasmodium_protein__unknown_function:location=Pf3D7_11_v3:1313257-1317173(+):protein_length=1231:sequence_SO=chromosome:SO=protein_coding_seq26', 'PF3D7_1420700.1-p1:transcript=PF3D7_1420700.1:gene=PF3D7_1420…
IENIENN	{'PF3D7_0620400.1-p1:transcript=PF3D7_0620400.1:gene=PF3D7_0620400:organism=Plasmodium_falciparum_3D7:gene_product=merozoite_surface_protein_10:transcript_product=merozoite_surface_protein_10:location=Pf3D7_06_v3:851378-852955(-):protein_length=525:sequence_SO=chromosome:SO=protein_coding_seq6', 'PF3D7_0620400.1-p1:transcript=PF3D7_0620400.1:gene=PF3D7_0620400:organism=Plasmodium_falciparum_3D7:g…
DDIKDGD	{'PF3D7_0919900.1-p1:transcript=PF3D7_0919900.1:gene=PF3D7_0919900:organism=Plasmodium_falciparum_3D7:gene_product=regulator_of_chromosome_condensation__putative:transcript_product=regulator_of_chromosome_condensation__putative:location=Pf3D7_09_v3:809659-819804(-):protein_length=3381:sequence_SO=chromosome:SO=protein_coding_seq24', 'PFIT_0920000.1-p1:transcript=PFIT_0920000.1:gene=PFIT_0920000:o…
LYTDEDL	{'PF3D7_1149200.1-p1:transcript=PF3D7_1149200.1:gene=PF3D7_1149200:organism=Plasmodium_falciparum_3D7:gene_product=ring-infected_erythrocyte_surface_antigen:transcript_product=ring-infected_erythrocyte_surface_antigen:location=Pf3D7_11_v3:1976407-1979804(+):protein_length=1090:sequence_SO=chromosome:SO=protein_coding_seq17', 'PF3D7_0102200.1-p1:transcript=PF3D7_0102200.1:gene=PF3D7_0102200:organi…
QKDQKDQ	{'PF3D7_1023100.1-p1:transcript=PF3D7_1023100.1:gene=PF3D7_1023100:organism=Plasmodium_falciparum_3D7:gene_product=dynein_heavy_chain__putative:transcript_product=dynein_heavy_chain__putative:location=Pf3D7_10_v3:963497-980560(-):protein_length=5687:sequence_SO=chromosome:SO=protein_coding_seq82', 'PF3D7_1023100.1-p1:transcript=PF3D7_1023100.1:gene=PF3D7_1023100:organism=Plasmodium_falciparum_3D7…
EVAEEVV	{'PF3D7_1038400.1-p1:transcript=PF3D7_1038400.1:gene=PF3D7_1038400:organism=Plasmodium_falciparum_3D7:gene_product=gametocyte-specific_protein:transcript_product=gametocyte-specific_protein:location=Pf3D7_10_v3:1519021-1547825(+):protein_length=9563:sequence_SO=chromosome:SO=protein_coding_seq233', 'PF3D7_1035900.1-p1:transcript=PF3D7_1035900.1:gene=PF3D7_1035900:organism=Plasmodium_falciparum_3D…
NEGKNKE	{'PF3D7_1442600.1-p1:transcript=PF3D7_1442600.1:gene=PF3D7_1442600:organism=Plasmodium_falciparum_3D7:gene_product=TRAP-like_protein:transcript_product=TRAP-like_protein:location=Pf3D7_14_v3:1730087-1740916(+):protein_length=3543:sequence_SO=chromosome:SO=protein_coding_seq110', 'PF3D7_1442600.1-p1:transcript=PF3D7_1442600.1:gene=PF3D7_1442600:organism=Plasmodium_falciparum_3D7:gene_product=TRAP-…
DNMNNMK|ENMNNMK	{'PF3D7_1415500.1-p1:transcript=PF3D7_1415500.1:gene=PF3D7_1415500:organism=Plasmodium_falciparum_3D7:gene_product=conserved_Plasmodium_membrane_protein__unknown_function:transcript_product=conserved_Plasmodium_membrane_protein__unknown_function:location=Pf3D7_14_v3:624486-628250(-):protein_length=1148:sequence_SO=chromosome:SO=protein_coding_seq23', 'PF3D7_1415500.1-p1:transcript=PF3D7_1415500.1…
LNEEEIT	{'PF3D7_0930300.1-p1:transcript=PF3D7_0930300.1:gene=PF3D7_0930300:organism=Plasmodium_falciparum_3D7:gene_product=merozoite_surface_protein_1:transcript_product=merozoite_surface_protein_1:location=Pf3D7_09_v3:1201812-1206974(+):protein_length=1720:sequence_SO=chromosome:SO=protein_coding_seq3', 'Plasmodiumfalciparum_AMA1_[K1_allele]_full-length_seq2', 'PF3D7_0930300.1-p1:transcript=PF3D7_093030…
DDNYNIK	{'PFIT_1228500.1-p1:transcript=PFIT_1228500.1:gene=PFIT_1228500:organism=Plasmodium_falciparum_IT:gene_product=conserved_Plasmodium_protein__unknown_function:transcript_product=conserved_Plasmodium_protein__unknown_function:location=PfIT_12_v3:1121130-1130633(-):protein_length=3167:sequence_SO=chromosome:SO=protein_coding_seq78', 'PFIT_1228500.1-p1:transcript=PFIT_1228500.1:gene=PFIT_1228500:orga…
VEENVEE	{'PF3D7_1149200.1-p1:transcript=PF3D7_1149200.1:gene=PF3D7_1149200:organism=Plasmodium_falciparum_3D7:gene_product=ring-infected_erythrocyte_surface_antigen:transcript_product=ring-infected_erythrocyte_surface_antigen:location=Pf3D7_11_v3:1976407-1979804(+):protein_length=1090:sequence_SO=chromosome:SO=protein_coding_seq38', 'PF3D7_1149200.1-p1:transcript=PF3D7_1149200.1:gene=PF3D7_1149200:organi…
YEEDLYP	{'PFIT_1478600.1-p1:transcript=PFIT_1478600.1:gene=PFIT_1478600:organism=Plasmodium_falciparum_IT:gene_product=Plasmodium_exported_protein_(PHISTb)__unknown_function:transcript_product=Plasmodium_exported_protein_(PHISTb)__unknown_function:location=PfIT_14_v3:3210330-3211978(+):protein_length=494:sequence_SO=chromosome:SO=protein_coding_seq16', 'PF3D7_1477500.1-p1:transcript=PF3D7_1477500.1:gene=…
FSNKKKK|FTNKKKK	{'PF3D7_0511500.1-p1:transcript=PF3D7_0511500.1:gene=PF3D7_0511500:organism=Plasmodium_falciparum_3D7:gene_product=RNA_pseudouridylate_synthase__putative:transcript_product=RNA_pseudouridylate_synthase__putative:location=Pf3D7_05_v3:486602-516787(+):protein_length=10061:sequence_SO=chromosome:SO=protein_coding_seq316', 'PF3D7_0414700.1-p1:transcript=PF3D7_0414700.1:gene=PF3D7_0414700:organism=Pla…
GDDNKSG	{'PFIT_1105400.1-p1:transcript=PFIT_1105400.1:gene=PFIT_1105400:organism=Plasmodium_falciparum_IT:gene_product=radial_spoke_head_protein__putative:transcript_product=radial_spoke_head_protein__putative:location=PfIT_11_v3:135836-137785(+):protein_length=649:sequence_SO=chromosome:SO=protein_coding_seq11', 'PF3D7_0507800.1-p1:transcript=PF3D7_0507800.1:gene=PF3D7_0507800:organism=Plasmodium_falcip…
PEEVVPE	{'PF3D7_1038400.1-p1:transcript=PF3D7_1038400.1:gene=PF3D7_1038400:organism=Plasmodium_falciparum_3D7:gene_product=gametocyte-specific_protein:transcript_product=gametocyte-specific_protein:location=Pf3D7_10_v3:1519021-1547825(+):protein_length=9563:sequence_SO=chromosome:SO=protein_coding_seq271', 'PF3D7_1038400.1-p1:transcript=PF3D7_1038400.1:gene=PF3D7_1038400:organism=Plasmodium_falciparum_3D…
NGNMQNL	{'PF3D7_0322700.1-p1:transcript=PF3D7_0322700.1:gene=PF3D7_0322700:organism=Plasmodium_falciparum_3D7:gene_product=conserved_Plasmodium_protein__unknown_function:transcript_product=conserved_Plasmodium_protein__unknown_function:location=Pf3D7_03_v3:952964-962367(-):protein_length=3096:sequence_SO=chromosome:SO=protein_coding_seq106', 'PF3D7_0322700.1-p1:transcript=PF3D7_0322700.1:gene=PF3D7_03227…
KNNENNE	{'PFIT_1237200.1-p1:transcript=PFIT_1237200.1:gene=PFIT_1237200:organism=Plasmodium_falciparum_IT:gene_product=conserved_Plasmodium_protein__unknown_function:transcript_product=conserved_Plasmodium_protein__unknown_function:location=PfIT_12_v3:1510268-1515331(-):protein_length=1687:sequence_SO=chromosome:SO=protein_coding_seq36', 'PF3D7_0630900.1-p1:transcript=PF3D7_0630900.1:gene=PF3D7_0630900:o…
ENDNSND	{'PF3D7_1443800.1-p1:transcript=PF3D7_1443800.1:gene=PF3D7_1443800:organism=Plasmodium_falciparum_3D7:gene_product=pre-mRNA-splicing_factor_CWC24__putative:transcript_product=pre-mRNA-splicing_factor_CWC24__putative:location=Pf3D7_14_v3:1794708-1795934(-):protein_length=408:sequence_SO=chromosome:SO=protein_coding_seq2', 'PF3D7_1209300.1-p1:transcript=PF3D7_1209300.1:gene=PF3D7_1209300:organism=P…
EELRKKE	{'PF3D7_1335300.1-p1:transcript=PF3D7_1335300.1:gene=PF3D7_1335300:organism=Plasmodium_falciparum_3D7:gene_product=reticulocyte_binding_protein_2_homologue_b:transcript_product=reticulocyte_binding_protein_2_homologue_b:location=Pf3D7_13_v3:1428874-1438852(-):protein_length=3254:sequence_SO=chromosome:SO=protein_coding_seq111', 'PF3D7_1335300.1-p1:transcript=PF3D7_1335300.1:gene=PF3D7_1335300:org…
NNDKNDK	{'PF3D7_1352700.1-p1:transcript=PF3D7_1352700.1:gene=PF3D7_1352700:organism=Plasmodium_falciparum_3D7:gene_product=P-loop_containing_nucleoside_triphosphate_hydrolase__putative:transcript_product=P-loop_containing_nucleoside_triphosphate_hydrolase__putative:location=Pf3D7_13_v3:2101485-2109086(+):protein_length=2533:sequence_SO=chromosome:SO=protein_coding_seq84', 'PFIT_0719200.1-p1:transcript=PF…
LKDDNDE|VKDDNDE	{'PF3D7_0904900.1-p1:transcript=PF3D7_0904900.1:gene=PF3D7_0904900:organism=Plasmodium_falciparum_3D7:gene_product=copper-transporting_ATPase:transcript_product=copper-transporting_ATPase:location=Pf3D7_09_v3:224875-232831(-):protein_length=2568:sequence_SO=chromosome:SO=protein_coding_seq54', 'HB3var26_seq39', 'PF3D7_0904900.1-p1:transcript=PF3D7_0904900.1:gene=PF3D7_0904900:organism=Plasmodium_…
KKDMNKE	{'PF3D7_0511500.1-p1:transcript=PF3D7_0511500.1:gene=PF3D7_0511500:organism=Plasmodium_falciparum_3D7:gene_product=RNA_pseudouridylate_synthase__putative:transcript_product=RNA_pseudouridylate_synthase__putative:location=Pf3D7_05_v3:486602-516787(+):protein_length=10061:sequence_SO=chromosome:SO=protein_coding_seq316', 'PF3D7_1417200.1-p1:transcript=PF3D7_1417200.1:gene=PF3D7_1417200:organism=Pla…
NIENNGI|QIENNGI	{'PF3D7_1301600.1-p1:transcript=PF3D7_1301600.1:gene=PF3D7_1301600:organism=Plasmodium_falciparum_3D7:gene_product=erythrocyte_binding_antigen-140:transcript_product=erythrocyte_binding_antigen-140:location=Pf3D7_13_v3:89319-93352(-):protein_length=1210:sequence_SO=chromosome:SO=protein_coding_seq39', 'PF3D7_1453200.1-p1:transcript=PF3D7_1453200.1:gene=PF3D7_1453200:organism=Plasmodium_falciparum…
NDKKNKK	{'PF3D7_0501400.1-p1:transcript=PF3D7_0501400.1:gene=PF3D7_0501400:organism=Plasmodium_falciparum_3D7:gene_product=interspersed_repeat_antigen:transcript_product=interspersed_repeat_antigen:location=Pf3D7_05_v3:74509-79842(+):protein_length=1720:sequence_SO=chromosome:SO=protein_coding_seq17', 'PF3D7_0501400.1-p1:transcript=PF3D7_0501400.1:gene=PF3D7_0501400:organism=Plasmodium_falciparum_3D7:gen…
KGDSEDD|KGDSEDE	{'PF3D7_0212500.1-p1:transcript=PF3D7_0212500.1:gene=PF3D7_0212500:organism=Plasmodium_falciparum_3D7:gene_product=conserved_Plasmodium_protein__unknown_function:transcript_product=conserved_Plasmodium_protein__unknown_function:location=Pf3D7_02_v3:509525-521746(+):protein_length=3990:sequence_SO=chromosome:SO=protein_coding_seq3', 'HB3var33_seq30', 'PFCLINvar63_seq29', 'PF3D7_0212500.1-p1:transc…
ERKKKEE	{'IT4var06_seq63', 'IGHvar26_seq58', 'PF13_0003_D5_seq9', 'IT4var06_seq62', 'PF11_0008_D4_seq9', 'HB3var03_seq59', 'HB3var03_seq58', 'PF3D7_1300300.1-p1:transcript=PF3D7_1300300.1:gene=PF3D7_1300300:organism=Plasmodium_falciparum_3D7:gene_product=erythrocyte_membrane_protein_1__PfEMP1:transcript_product=erythrocyte_membrane_protein_1__PfEMP1:location=Pf3D7_13_v3:33959-44742(-):protein_length=3346…
GTSPSSR	{'Plasmodiumfalciparum_AMA1_[K1_allele]_full-length_seq4', 'PF3D7_0930300.1-p1:transcript=PF3D7_0930300.1:gene=PF3D7_0930300:organism=Plasmodium_falciparum_3D7:gene_product=merozoite_surface_protein_1:transcript_product=merozoite_surface_protein_1:location=Pf3D7_09_v3:1201812-1206974(+):protein_length=1720:sequence_SO=chromosome:SO=protein_coding_seq5', 'PF3D7_0930300.1-p1:transcript=PF3D7_093030…
KNDVEIN	{'PF3D7_0405300.1-p1:transcript=PF3D7_0405300.1:gene=PF3D7_0405300:organism=Plasmodium_falciparum_3D7:gene_product=liver_specific_protein_2__putative:transcript_product=liver_specific_protein_2__putative:location=Pf3D7_04_v3:282403-288297(-):protein_length=1964:sequence_SO=chromosome:SO=protein_coding_seq75', 'PF3D7_0104400.1-p1:transcript=PF3D7_0104400.1:gene=PF3D7_0104400:organism=Plasmodium_fa…
EEVIEEV	{'PF3D7_1038400.1-p1:transcript=PF3D7_1038400.1:gene=PF3D7_1038400:organism=Plasmodium_falciparum_3D7:gene_product=gametocyte-specific_protein:transcript_product=gametocyte-specific_protein:location=Pf3D7_10_v3:1519021-1547825(+):protein_length=9563:sequence_SO=chromosome:SO=protein_coding_seq183', 'PF3D7_1038400.1-p1:transcript=PF3D7_1038400.1:gene=PF3D7_1038400:organism=Plasmodium_falciparum_3D…
SILKSEN|SVLKSEN	{'PF3D7_0704200.1-p1:transcript=PF3D7_0704200.1:gene=PF3D7_0704200:organism=Plasmodium_falciparum_3D7:gene_product=tRNA_m5C-methyltransferase__putative:transcript_product=tRNA_m5C-methyltransferase__putative:location=Pf3D7_07_v3:191309-194890(-):protein_length=1193:sequence_SO=chromosome:SO=protein_coding_seq28', 'PF3D7_1200700.1-p1:transcript=PF3D7_1200700.1:gene=PF3D7_1200700:organism=Plasmodiu…
DIKNDDI	{'PF3D7_0925800.1-p1:transcript=PF3D7_0925800.1:gene=PF3D7_0925800:organism=Plasmodium_falciparum_3D7:gene_product=conserved_Plasmodium_protein__unknown_function:transcript_product=conserved_Plasmodium_protein__unknown_function:location=Pf3D7_09_v3:1033315-1038579(+):protein_length=1754:sequence_SO=chromosome:SO=protein_coding_seq22', 'PF3D7_1359700.1-p1:transcript=PF3D7_1359700.1:gene=PF3D7_1359…
NFNKNKN|QFNKNKN	{'PF3D7_1349500.1-p1:transcript=PF3D7_1349500.1:gene=PF3D7_1349500:organism=Plasmodium_falciparum_3D7:gene_product=conserved_Plasmodium_protein__unknown_function:transcript_product=conserved_Plasmodium_protein__unknown_function:location=Pf3D7_13_v3:1985337-1995614(-):protein_length=3381:sequence_SO=chromosome:SO=protein_coding_seq93', 'PF3D7_0310200.1-p1:transcript=PF3D7_0310200.1:gene=PF3D7_0310…
VKNDVKN|VKNEVKN	{'PF3D7_1404900.1-p1:transcript=PF3D7_1404900.1:gene=PF3D7_1404900:organism=Plasmodium_falciparum_3D7:gene_product=conserved_Plasmodium_protein__unknown_function:transcript_product=conserved_Plasmodium_protein__unknown_function:location=Pf3D7_14_v3:170000-170893(+):protein_length=297:sequence_SO=chromosome:SO=protein_coding_seq2', 'PF3D7_0401900.1-p1:transcript=PF3D7_0401900.1:gene=PF3D7_0401900:…
KDISNKD|KDLSNKD	{'PF3D7_0201900.1-p1:transcript=PF3D7_0201900.1:gene=PF3D7_0201900:organism=Plasmodium_falciparum_3D7:gene_product=erythrocyte_membrane_protein_3:transcript_product=erythrocyte_membrane_protein_3:location=Pf3D7_02_v3:91318-98838(-):protein_length=2441:sequence_SO=chromosome:SO=protein_coding_seq52', 'PF3D7_0201900.1-p1:transcript=PF3D7_0201900.1:gene=PF3D7_0201900:organism=Plasmodium_falciparum_3…
SADPEGQ	{'PF3D7_1016300.1-p1:transcript=PF3D7_1016300.1:gene=PF3D7_1016300:organism=Plasmodium_falciparum_3D7:gene_product=glycophorin_binding_protein:transcript_product=glycophorin_binding_protein:location=Pf3D7_10_v3:650898-653567(-):protein_length=824:sequence_SO=chromosome:SO=protein_coding_seq31', 'PF3D7_1016300.1-p1:transcript=PF3D7_1016300.1:gene=PF3D7_1016300:organism=Plasmodium_falciparum_3D7:ge…
EKKMEKE	{'PFIT_0202400.1-p1:transcript=PFIT_0202400.1:gene=PFIT_0202400:organism=Plasmodium_falciparum_IT:gene_product=protein_kinase__putative:transcript_product=protein_kinase__putative:location=PfIT_02_v3:95554-103023(-):protein_length=2489:sequence_SO=chromosome:SO=protein_coding_seq43', 'PF3D7_1235400.1-p1:transcript=PF3D7_1235400.1:gene=PF3D7_1235400:organism=Plasmodium_falciparum_3D7:gene_product=…
EAKNDIL|EGKNDIL	{'PFA0765c_D4_seq8', 'PF3D7_0424400.1-p1:transcript=PF3D7_0424400.1:gene=PF3D7_0424400:organism=Plasmodium_falciparum_3D7:gene_product=surface-associated_interspersed_protein_4.2_(SURFIN_4.2):transcript_product=surface-associated_interspersed_protein_4.2_(SURFIN_4.2):location=Pf3D7_04_v3:1099811-1107111(+):protein_length=2380:sequence_SO=chromosome:SO=protein_coding_seq34', 'IT4var30_seq38', 'PFA…
EEVVEEV	{'PF3D7_1038400.1-p1:transcript=PF3D7_1038400.1:gene=PF3D7_1038400:organism=Plasmodium_falciparum_3D7:gene_product=gametocyte-specific_protein:transcript_product=gametocyte-specific_protein:location=Pf3D7_10_v3:1519021-1547825(+):protein_length=9563:sequence_SO=chromosome:SO=protein_coding_seq175', 'PF3D7_1038400.1-p1:transcript=PF3D7_1038400.1:gene=PF3D7_1038400:organism=Plasmodium_falciparum_3D…
ametocyte-specific_protein:location=Pf3D7_10_v3:1519021-1547825(+):protein_length=9563:sequence_SO=chromosome:SO=protein_coding_seq200', 'PF3D7_1038400.1-p1:transcript=PF3D7_1038400.1:gene=PF3D7_1038400:organism=Plasmodium_falciparum_3D7:gene_product=gametocyte-specific_protein:transcript_product=gametocyte-specific_protein:location=Pf3D7_10_v3:1519021-1547825(+):protein_length=9563:sequence_SO=c…
NEKNMKN	{'PF3D7_1143100.1-p1:transcript=PF3D7_1143100.1:gene=PF3D7_1143100:organism=Plasmodium_falciparum_3D7:gene_product=AP2_domain_transcription_factor_AP2-O__putative:transcript_product=AP2_domain_transcription_factor_AP2-O__putative:location=Pf3D7_11_v3:1720047-1724861(-):protein_length=1604:sequence_SO=chromosome:SO=protein_coding_seq27', 'PFIT_1143800.1-p1:transcript=PFIT_1143800.1:gene=PFIT_11438…
ALKRQEQ	{'PF3D7_1335400.1-p1:transcript=PF3D7_1335400.1:gene=PF3D7_1335400:organism=Plasmodium_falciparum_3D7:gene_product=reticulocyte_binding_protein_2_homologue_a:transcript_product=reticulocyte_binding_protein_2_homologue_a:location=Pf3D7_13_v3:1440779-1450385(+):protein_length=3130:sequence_SO=chromosome:SO=protein_coding_seq110', 'PF3D7_1335400.1-p1:transcript=PF3D7_1335400.1:gene=PF3D7_1335400:org…
ILKEEEE	{'PF3D7_1335400.1-p1:transcript=PF3D7_1335400.1:gene=PF3D7_1335400:organism=Plasmodium_falciparum_3D7:gene_product=reticulocyte_binding_protein_2_homologue_a:transcript_product=reticulocyte_binding_protein_2_homologue_a:location=Pf3D7_13_v3:1440779-1450385(+):protein_length=3130:sequence_SO=chromosome:SO=protein_coding_seq106', 'PF3D7_1335300.1-p1:transcript=PF3D7_1335300.1:gene=PF3D7_1335300:org…
IKRDNIK	{'PF3D7_0704300.1-p1:transcript=PF3D7_0704300.1:gene=PF3D7_0704300:organism=Plasmodium_falciparum_3D7:gene_product=conserved_Plasmodium_membrane_protein__unknown_function:transcript_product=conserved_Plasmodium_membrane_protein__unknown_function:location=Pf3D7_07_v3:197691-203249(+):protein_length=1852:sequence_SO=chromosome:SO=protein_coding_seq25', 'PF3D7_0718000.1-p1:transcript=PF3D7_0718000.1…
KLKKIKD|KLKKVKD	{'DD2var25_seq13', 'DD2var25_seq12', 'PF3D7_0731600.1-p1:transcript=PF3D7_0731600.1:gene=PF3D7_0731600:organism=Plasmodium_falciparum_3D7:gene_product=acyl-CoA_synthetase:transcript_product=acyl-CoA_synthetase:location=Pf3D7_07_v3:1368161-1370596(+):protein_length=811:sequence_SO=chromosome:SO=protein_coding_seq9', 'TM284var3_seq12', 'PF3D7_0731600.1-p1:transcript=PF3D7_0731600.1:gene=PF3D7_07316…
NIKSDKI|NVKSDKI	{'PFIT_0613800.1-p1:transcript=PFIT_0613800.1:gene=PFIT_0613800:organism=Plasmodium_falciparum_IT:gene_product=endonuclease_III_homologue__putative:transcript_product=endonuclease_III_homologue__putative:location=PfIT_06_v3:556554-557837(-):protein_length=427:sequence_SO=chromosome:SO=protein_coding_seq6', 'PF3D7_0305200.1-p1:transcript=PF3D7_0305200.1:gene=PF3D7_0305200:organism=Plasmodium_falci…
DNNKEKN	{'PF3D7_0904900.1-p1:transcript=PF3D7_0904900.1:gene=PF3D7_0904900:organism=Plasmodium_falciparum_3D7:gene_product=copper-transporting_ATPase:transcript_product=copper-transporting_ATPase:location=Pf3D7_09_v3:224875-232831(-):protein_length=2568:sequence_SO=chromosome:SO=protein_coding_seq31', 'PF3D7_1107300.1-p1:transcript=PF3D7_1107300.1:gene=PF3D7_1107300:organism=Plasmodium_falciparum_3D7:gen…
KNNNKKE	{'PF3D7_0513200.1-p1:transcript=PF3D7_0513200.1:gene=PF3D7_0513200:organism=Plasmodium_falciparum_3D7:gene_product=conserved_Plasmodium_protein__unknown_function:transcript_product=conserved_Plasmodium_protein__unknown_function:location=Pf3D7_05_v3:559513-568384(+):protein_length=2763:sequence_SO=chromosome:SO=protein_coding_seq27', 'PF3D7_0510000.1-p1:transcript=PF3D7_0510000.1:gene=PF3D7_051000…
DNQMNNN	{'PFIT_1021400.1-p1:transcript=PFIT_1021400.1:gene=PFIT_1021400:organism=Plasmodium_falciparum_IT:gene_product=conserved_Plasmodium_protein_(10b_antigen)__unknown_function:transcript_product=conserved_Plasmodium_protein_(10b_antigen)__unknown_function:location=PfIT_10_v3:840446-847246(-):protein_length=2266:sequence_SO=chromosome:SO=protein_coding_seq10', 'PFIT_1021400.1-p1:transcript=PFIT_102140…
GDNKMNG	{'PFIT_1342100.1-p1:transcript=PFIT_1342100.1:gene=PFIT_1342100:organism=Plasmodium_falciparum_IT:gene_product=transcription_factor_with_AP2_domain(s):transcript_product=transcription_factor_with_AP2_domain(s):location=PfIT_13_v3:1634784-1646174(-):protein_length=3796:sequence_SO=chromosome:SO=protein_coding_seq29', 'PF3D7_0709300.1-p1:transcript=PF3D7_0709300.1:gene=PF3D7_0709300:organism=Plasmo…
INEKSNE|INEKTNE	{'PF3D7_0604500.1-p1:transcript=PF3D7_0604500.1:gene=PF3D7_0604500:organism=Plasmodium_falciparum_3D7:gene_product=conserved_Plasmodium_protein__unknown_function:transcript_product=conserved_Plasmodium_protein__unknown_function:location=Pf3D7_06_v3:189012-198078(+):protein_length=2874:sequence_SO=chromosome:SO=protein_coding_seq105', 'PF3D7_1444100.1-p1:transcript=PF3D7_1444100.1:gene=PF3D7_14441…
EEKNEKK|EERNEKK	{'PF3D7_0401900.1-p1:transcript=PF3D7_0401900.1:gene=PF3D7_0401900:organism=Plasmodium_falciparum_3D7:gene_product=acyl-CoA_synthetase:transcript_product=acyl-CoA_synthetase:location=Pf3D7_04_v3:108380-111295(-):protein_length=971:sequence_SO=chromosome:SO=protein_coding_seq37', 'PF3D7_1235300.1-p1:transcript=PF3D7_1235300.1:gene=PF3D7_1235300:organism=Plasmodium_falciparum_3D7:gene_product=CCR4-…
DLGDEKL	{'PF3D7_1335400.1-p1:transcript=PF3D7_1335400.1:gene=PF3D7_1335400:organism=Plasmodium_falciparum_3D7:gene_product=reticulocyte_binding_protein_2_homologue_a:transcript_product=reticulocyte_binding_protein_2_homologue_a:location=Pf3D7_13_v3:1440779-1450385(+):protein_length=3130:sequence_SO=chromosome:SO=protein_coding_seq106', 'PF3D7_1335300.1-p1:transcript=PF3D7_1335300.1:gene=PF3D7_1335300:org…
KDNNNKK	{'PF3D7_0511500.1-p1:transcript=PF3D7_0511500.1:gene=PF3D7_0511500:organism=Plasmodium_falciparum_3D7:gene_product=RNA_pseudouridylate_synthase__putative:transcript_product=RNA_pseudouridylate_synthase__putative:location=Pf3D7_05_v3:486602-516787(+):protein_length=10061:sequence_SO=chromosome:SO=protein_coding_seq45', 'PFIT_1456800.1-p1:transcript=PFIT_1456800.1:gene=PFIT_1456800:organism=Plasmod…
DNIKNND	{'PF3D7_0914500.1-p1:transcript=PF3D7_0914500.1:gene=PF3D7_0914500:organism=Plasmodium_falciparum_3D7:gene_product=conserved_Plasmodium_protein__unknown_function:transcript_product=conserved_Plasmodium_protein__unknown_function:location=Pf3D7_09_v3:620788-626149(-):protein_length=1728:sequence_SO=chromosome:SO=protein_coding_seq2', 'PF3D7_0914500.1-p1:transcript=PF3D7_0914500.1:gene=PF3D7_0914500…
QMNNNTK	{'PFIT_1021400.1-p1:transcript=PFIT_1021400.1:gene=PFIT_1021400:organism=Plasmodium_falciparum_IT:gene_product=conserved_Plasmodium_protein_(10b_antigen)__unknown_function:transcript_product=conserved_Plasmodium_protein_(10b_antigen)__unknown_function:location=PfIT_10_v3:840446-847246(-):protein_length=2266:sequence_SO=chromosome:SO=protein_coding_seq10', 'PFIT_1021400.1-p1:transcript=PFIT_102140…
HKKNDMK	{'PFIT_1228500.1-p1:transcript=PFIT_1228500.1:gene=PFIT_1228500:organism=Plasmodium_falciparum_IT:gene_product=conserved_Plasmodium_protein__unknown_function:transcript_product=conserved_Plasmodium_protein__unknown_function:location=PfIT_12_v3:1121130-1130633(-):protein_length=3167:sequence_SO=chromosome:SO=protein_coding_seq78', 'PFIT_1228500.1-p1:transcript=PFIT_1228500.1:gene=PFIT_1228500:orga…
KHLKDEP|KKLKDEP	{'PF3D7_0801000.1-p1:transcript=PF3D7_0801000.1:gene=PF3D7_0801000:organism=Plasmodium_falciparum_3D7:gene_product=Plasmodium_exported_protein_(PHISTc)__unknown_function:transcript_product=Plasmodium_exported_protein_(PHISTc)__unknown_function:location=Pf3D7_08_v3:84568-88422(-):protein_length=1219:sequence_SO=chromosome:SO=protein_coding_seq16', 'HB3var05_seq62', 'PF3D7_0801000.1-p1:transcript=P…
DVKEDII	{'PF3D7_0715200.1-p1:transcript=PF3D7_0715200.1:gene=PF3D7_0715200:organism=Plasmodium_falciparum_3D7:gene_product=conserved_Plasmodium_protein__unknown_function:transcript_product=conserved_Plasmodium_protein__unknown_function:location=Pf3D7_07_v3:676061-682681(-):protein_length=2206:sequence_SO=chromosome:SO=protein_coding_seq20', 'PFIT_0713300.1-p1:transcript=PFIT_0713300.1:gene=PFIT_0713300:o…
EKQKYMD	{'PF3D7_1149200.1-p1:transcript=PF3D7_1149200.1:gene=PF3D7_1149200:organism=Plasmodium_falciparum_3D7:gene_product=ring-infected_erythrocyte_surface_antigen:transcript_product=ring-infected_erythrocyte_surface_antigen:location=Pf3D7_11_v3:1976407-1979804(+):protein_length=1090:sequence_SO=chromosome:SO=protein_coding_seq17', 'PF3D7_0102200.1-p1:transcript=PF3D7_0102200.1:gene=PF3D7_0102200:organi…
NNVVVNL	{'PF3D7_0919900.1-p1:transcript=PF3D7_0919900.1:gene=PF3D7_0919900:organism=Plasmodium_falciparum_3D7:gene_product=regulator_of_chromosome_condensation__putative:transcript_product=regulator_of_chromosome_condensation__putative:location=Pf3D7_09_v3:809659-819804(-):protein_length=3381:sequence_SO=chromosome:SO=protein_coding_seq24', 'PFIT_0920000.1-p1:transcript=PFIT_0920000.1:gene=PFIT_0920000:o…
GTSGPSG	{'PF3D7_0930300.1-p1:transcript=PF3D7_0930300.1:gene=PF3D7_0930300:organism=Plasmodium_falciparum_3D7:gene_product=merozoite_surface_protein_1:transcript_product=merozoite_surface_protein_1:location=Pf3D7_09_v3:1201812-1206974(+):protein_length=1720:sequence_SO=chromosome:SO=protein_coding_seq3', 'Plasmodiumfalciparum_AMA1_[K1_allele]_full-length_seq2', 'PF3D7_0930300.1-p1:transcript=PF3D7_093030…
PEYRKHV	{'PF3D7_1401000.1-p1:transcript=PF3D7_1401000.1:gene=PF3D7_1401000:organism=Plasmodium_falciparum_3D7:gene_product=glycophorin_binding_protein:transcript_product=glycophorin_binding_protein:location=Pf3D7_14_v3:34693-35773(-):protein_length=307:sequence_SO=chromosome:SO=protein_coding_seq11', 'PF3D7_1401000.1-p1:transcript=PF3D7_1401000.1:gene=PF3D7_1401000:organism=Plasmodium_falciparum_3D7:gene…
QERQEQQ	{'PF3D7_1335400.1-p1:transcript=PF3D7_1335400.1:gene=PF3D7_1335400:organism=Plasmodium_falciparum_3D7:gene_product=reticulocyte_binding_protein_2_homologue_a:transcript_product=reticulocyte_binding_protein_2_homologue_a:location=Pf3D7_13_v3:1440779-1450385(+):protein_length=3130:sequence_SO=chromosome:SO=protein_coding_seq110', 'PF3D7_1335300.1-p1:transcript=PF3D7_1335300.1:gene=PF3D7_1335300:org…
AEEIVEE	{'PF3D7_1149000.1-p1:transcript=PF3D7_1149000.1:gene=PF3D7_1149000:organism=Plasmodium_falciparum_3D7:gene_product=antigen_332__DBL-like_protein:transcript_product=antigen_332__DBL-like_protein:location=Pf3D7_11_v3:1950210-1968726(+):protein_length=6093:sequence_SO=chromosome:SO=protein_coding_seq156', 'PF3D7_1038400.1-p1:transcript=PF3D7_1038400.1:gene=PF3D7_1038400:organism=Plasmodium_falciparu…
MNNNTKN	{'PFIT_1021400.1-p1:transcript=PFIT_1021400.1:gene=PFIT_1021400:organism=Plasmodium_falciparum_IT:gene_product=conserved_Plasmodium_protein_(10b_antigen)__unknown_function:transcript_product=conserved_Plasmodium_protein_(10b_antigen)__unknown_function:location=PfIT_10_v3:840446-847246(-):protein_length=2266:sequence_SO=chromosome:SO=protein_coding_seq11', 'PF3D7_1021900.1-p1:transcript=PF3D7_1021…
NHSEKLN	{'PF3D7_0220100.1-p1:transcript=PF3D7_0220100.1:gene=PF3D7_0220100:organism=Plasmodium_falciparum_3D7:gene_product=DnaJ_protein__putative:transcript_product=DnaJ_protein__putative:location=Pf3D7_02_v3:804520-807741(+):protein_length=997:sequence_SO=chromosome:SO=protein_coding_seq20', 'PF3D7_0220100.1-p1:transcript=PF3D7_0220100.1:gene=PF3D7_0220100:organism=Plasmodium_falciparum_3D7:gene_product…
NEKSNEK	{'PF3D7_1444100.1-p1:transcript=PF3D7_1444100.1:gene=PF3D7_1444100:organism=Plasmodium_falciparum_3D7:gene_product=conserved_Plasmodium_protein__unknown_function:transcript_product=conserved_Plasmodium_protein__unknown_function:location=Pf3D7_14_v3:1801961-1825326(-):protein_length=7231:sequence_SO=chromosome:SO=protein_coding_seq137', 'PF3D7_1429200.1-p1:transcript=PF3D7_1429200.1:gene=PF3D7_142…
GENIMSG	{'PFIT_1342100.1-p1:transcript=PFIT_1342100.1:gene=PFIT_1342100:organism=Plasmodium_falciparum_IT:gene_product=transcription_factor_with_AP2_domain(s):transcript_product=transcription_factor_with_AP2_domain(s):location=PfIT_13_v3:1634784-1646174(-):protein_length=3796:sequence_SO=chromosome:SO=protein_coding_seq29', 'PF3D7_1342900.1-p1:transcript=PF3D7_1342900.1:gene=PF3D7_1342900:organism=Plasmo…
IEEQQED	{'PF3D7_1035700.1-p1:transcript=PF3D7_1035700.1:gene=PF3D7_1035700:organism=Plasmodium_falciparum_3D7:gene_product=duffy_binding-like_merozoite_surface_protein:transcript_product=duffy_binding-like_merozoite_surface_protein:location=Pf3D7_10_v3:1413200-1415293(+):protein_length=697:sequence_SO=chromosome:SO=protein_coding_seq23', 'PF3D7_1035700.1-p1:transcript=PF3D7_1035700.1:gene=PF3D7_1035700:o…
NKNNNDD|NKNNNDE	{'PF3D7_1471900.1-p1:transcript=PF3D7_1471900.1:gene=PF3D7_1471900:organism=Plasmodium_falciparum_3D7:gene_product=conserved_Plasmodium_protein__unknown_function:transcript_product=conserved_Plasmodium_protein__unknown_function:location=Pf3D7_14_v3:2933162-2939779(-):protein_length=2128:sequence_SO=chromosome:SO=protein_coding_seq19', 'PF3D7_1015100.1-p1:transcript=PF3D7_1015100.1:gene=PF3D7_1015…
RKERERI	{'PF3D7_1335300.1-p1:transcript=PF3D7_1335300.1:gene=PF3D7_1335300:organism=Plasmodium_falciparum_3D7:gene_product=reticulocyte_binding_protein_2_homologue_b:transcript_product=reticulocyte_binding_protein_2_homologue_b:location=Pf3D7_13_v3:1428874-1438852(-):protein_length=3254:sequence_SO=chromosome:SO=protein_coding_seq108', 'PF3D7_1335400.1-p1:transcript=PF3D7_1335400.1:gene=PF3D7_1335400:org…
NKDISNK|NKDLSNK	{'PF3D7_0201900.1-p1:transcript=PF3D7_0201900.1:gene=PF3D7_0201900:organism=Plasmodium_falciparum_3D7:gene_product=erythrocyte_membrane_protein_3:transcript_product=erythrocyte_membrane_protein_3:location=Pf3D7_02_v3:91318-98838(-):protein_length=2441:sequence_SO=chromosome:SO=protein_coding_seq52', 'PF3D7_0201900.1-p1:transcript=PF3D7_0201900.1:gene=PF3D7_0201900:organism=Plasmodium_falciparum_3…
KQKYMDM	{'PF3D7_1149200.1-p1:transcript=PF3D7_1149200.1:gene=PF3D7_1149200:organism=Plasmodium_falciparum_3D7:gene_product=ring-infected_erythrocyte_surface_antigen:transcript_product=ring-infected_erythrocyte_surface_antigen:location=Pf3D7_11_v3:1976407-1979804(+):protein_length=1090:sequence_SO=chromosome:SO=protein_coding_seq17', 'PF3D7_0102200.1-p1:transcript=PF3D7_0102200.1:gene=PF3D7_0102200:organi…
KNIDGIK|KNVDGIK	{'PF3D7_1203300.1-p1:transcript=PF3D7_1203300.1:gene=PF3D7_1203300:organism=Plasmodium_falciparum_3D7:gene_product=conserved_Plasmodium_protein__unknown_function:transcript_product=conserved_Plasmodium_protein__unknown_function:location=Pf3D7_12_v3:173875-176853(-):protein_length=992:sequence_SO=chromosome:SO=protein_coding_seq9', 'PF3D7_1203300.1-p1:transcript=PF3D7_1203300.1:gene=PF3D7_1203300:…
ERQEQQQ	{'PF3D7_1335400.1-p1:transcript=PF3D7_1335400.1:gene=PF3D7_1335400:organism=Plasmodium_falciparum_3D7:gene_product=reticulocyte_binding_protein_2_homologue_a:transcript_product=reticulocyte_binding_protein_2_homologue_a:location=Pf3D7_13_v3:1440779-1450385(+):protein_length=3130:sequence_SO=chromosome:SO=protein_coding_seq110', 'PF3D7_1335300.1-p1:transcript=PF3D7_1335300.1:gene=PF3D7_1335300:org…
LTNTDPN	{'PF3D7_1016300.1-p1:transcript=PF3D7_1016300.1:gene=PF3D7_1016300:organism=Plasmodium_falciparum_3D7:gene_product=glycophorin_binding_protein:transcript_product=glycophorin_binding_protein:location=Pf3D7_10_v3:650898-653567(-):protein_length=824:sequence_SO=chromosome:SO=protein_coding_seq31', 'PF3D7_1016300.1-p1:transcript=PF3D7_1016300.1:gene=PF3D7_1016300:organism=Plasmodium_falciparum_3D7:ge…
ILTNTDP	{'PF3D7_1016300.1-p1:transcript=PF3D7_1016300.1:gene=PF3D7_1016300:organism=Plasmodium_falciparum_3D7:gene_product=glycophorin_binding_protein:transcript_product=glycophorin_binding_protein:location=Pf3D7_10_v3:650898-653567(-):protein_length=824:sequence_SO=chromosome:SO=protein_coding_seq31', 'PF3D7_1016300.1-p1:transcript=PF3D7_1016300.1:gene=PF3D7_1016300:organism=Plasmodium_falciparum_3D7:ge…
MNNINNI	{'PFIT_1205400.1-p1:transcript=PFIT_1205400.1:gene=PFIT_1205400:organism=Plasmodium_falciparum_IT:gene_product=high_mobility_group_protein_B3__putative:transcript_product=high_mobility_group_protein_B3__putative:location=PfIT_12_v3:211124-218449(+):protein_length=2263:sequence_SO=chromosome:SO=protein_coding_seq67', 'PF3D7_1120600.1-p1:transcript=PF3D7_1120600.1:gene=PF3D7_1120600:organism=Plasmo…
IYKNKLK	{'PF3D7_1002000.1-p1:transcript=PF3D7_1002000.1:gene=PF3D7_1002000:organism=Plasmodium_falciparum_3D7:gene_product=Plasmodium_exported_protein_(hyp2)__unknown_function:transcript_product=Plasmodium_exported_protein_(hyp2)__unknown_function:location=Pf3D7_10_v3:103118-104683(-):protein_length=469:sequence_SO=chromosome:SO=protein_coding_seq14', 'PF3D7_1002000.1-p1:transcript=PF3D7_1002000.1:gene=P…
GDNENSK	{'PF3D7_1211900.1-p1:transcript=PF3D7_1211900.1:gene=PF3D7_1211900:organism=Plasmodium_falciparum_3D7:gene_product=non-SERCA-type_Ca2+_-transporting_P-ATPase:transcript_product=non-SERCA-type_Ca2+_-transporting_P-ATPase:location=Pf3D7_12_v3:529005-532799(-):protein_length=1264:sequence_SO=chromosome:SO=protein_coding_seq2', 'PF3D7_1018200.1-p1:transcript=PF3D7_1018200.1:gene=PF3D7_1018200:organis…
VEEDIEE	{'PF3D7_0220000.1-p1:transcript=PF3D7_0220000.1:gene=PF3D7_0220000:organism=Plasmodium_falciparum_3D7:gene_product=liver_stage_antigen_3:transcript_product=liver_stage_antigen_3:location=Pf3D7_02_v3:796752-801586(+):protein_length=1558:sequence_SO=chromosome:SO=protein_coding_seq52', 'PF3D7_0220000.1-p1:transcript=PF3D7_0220000.1:gene=PF3D7_0220000:organism=Plasmodium_falciparum_3D7:gene_product=…
KKTNEEN	{'PF3D7_0202000.1-p1:transcript=PF3D7_0202000.1:gene=PF3D7_0202000:organism=Plasmodium_falciparum_3D7:gene_product=knob-associated_histidine-rich_protein:transcript_product=knob-associated_histidine-rich_protein:location=Pf3D7_02_v3:103385-105796(-):protein_length=654:sequence_SO=chromosome:SO=protein_coding_seq18', 'PF3D7_1443800.1-p1:transcript=PF3D7_1443800.1:gene=PF3D7_1443800:organism=Plasmo…
NNNKLNN	{'PFIT_1021400.1-p1:transcript=PFIT_1021400.1:gene=PFIT_1021400:organism=Plasmodium_falciparum_IT:gene_product=conserved_Plasmodium_protein_(10b_antigen)__unknown_function:transcript_product=conserved_Plasmodium_protein_(10b_antigen)__unknown_function:location=PfIT_10_v3:840446-847246(-):protein_length=2266:sequence_SO=chromosome:SO=protein_coding_seq11', 'PF3D7_1021900.1-p1:transcript=PF3D7_1021…
QITDEKE|QITEEKE	{'IGHvar38_seq18', 'IGHvar38_seq17', 'PF3D7_0406500.1-p1:transcript=PF3D7_0406500.1:gene=PF3D7_0406500:organism=Plasmodium_falciparum_3D7:gene_product=NYN_domain-containing_protein__putative:transcript_product=NYN_domain-containing_protein__putative:location=Pf3D7_04_v3:334282-344054(-):protein_length=3211:sequence_SO=chromosome:SO=protein_coding_seq99', 'PF3D7_0406500.1-p1:transcript=PF3D7_04065…
DMEKKME|EMEKKME	{'PFIT_0202400.1-p1:transcript=PFIT_0202400.1:gene=PFIT_0202400:organism=Plasmodium_falciparum_IT:gene_product=protein_kinase__putative:transcript_product=protein_kinase__putative:location=PfIT_02_v3:95554-103023(-):protein_length=2489:sequence_SO=chromosome:SO=protein_coding_seq43', 'PF3D7_1235400.1-p1:transcript=PF3D7_1235400.1:gene=PF3D7_1235400:organism=Plasmodium_falciparum_3D7:gene_product=…
KLNNIKK	{'PF3D7_0110500.1-p1:transcript=PF3D7_0110500.1:gene=PF3D7_0110500:organism=Plasmodium_falciparum_3D7:gene_product=bromodomain_protein__putative:transcript_product=bromodomain_protein__putative:location=Pf3D7_01_v3:396591-403606(+):protein_length=2285:sequence_SO=chromosome:SO=protein_coding_seq10', 'PF3D7_1301600.1-p1:transcript=PF3D7_1301600.1:gene=PF3D7_1301600:organism=Plasmodium_falciparum_3…
KSNIIER|KSQIIER	{'PF3D7_1231800.1-p1:transcript=PF3D7_1231800.1:gene=PF3D7_1231800:organism=Plasmodium_falciparum_3D7:gene_product=asparagine-rich_protein__putative:transcript_product=asparagine-rich_protein__putative:location=Pf3D7_12_v3:1314696-1320170(+):protein_length=1824:sequence_SO=chromosome:SO=protein_coding_seq5', 'PF3D7_1231800.1-p1:transcript=PF3D7_1231800.1:gene=PF3D7_1231800:organism=Plasmodium_fal…
KKIKEEN|KKLKEEN	{'DD2var49_seq16', 'PFCLINvar62_seq16', 'PF3D7_1442600.1-p1:transcript=PF3D7_1442600.1:gene=PF3D7_1442600:organism=Plasmodium_falciparum_3D7:gene_product=TRAP-like_protein:transcript_product=TRAP-like_protein:location=Pf3D7_14_v3:1730087-1740916(+):protein_length=3543:sequence_SO=chromosome:SO=protein_coding_seq119', 'PFCLINvar62_seq17', 'DD2var49_seq17'}
NEKNEKK	{'PF3D7_0308900.1-p1:transcript=PF3D7_0308900.1:gene=PF3D7_0308900:organism=Plasmodium_falciparum_3D7:gene_product=splicing_factor_3B_subunit_1__putative:transcript_product=splicing_factor_3B_subunit_1__putative:location=Pf3D7_03_v3:379130-383290(-):protein_length=1386:sequence_SO=chromosome:SO=protein_coding_seq9', 'PF3D7_0507800.1-p1:transcript=PF3D7_0507800.1:gene=PF3D7_0507800:organism=Plasmo…
NMKGDIN|NMKGDVN	{'PF3D7_0529400.1-p1:transcript=PF3D7_0529400.1:gene=PF3D7_0529400:organism=Plasmodium_falciparum_3D7:gene_product=conserved_Plasmodium_protein__unknown_function:transcript_product=conserved_Plasmodium_protein__unknown_function:location=Pf3D7_05_v3:1199165-1205187(+):protein_length=1582:sequence_SO=chromosome:SO=protein_coding_seq33', 'PF3D7_0731100.1-p1:transcript=PF3D7_0731100.1:gene=PF3D7_0731…
DKLIGDN	{'IT4var17_seq93', 'PFIT_1232300.1-p1:transcript=PFIT_1232300.1:gene=PFIT_1232300:organism=Plasmodium_falciparum_IT:gene_product=CG2-related_protein__putative:transcript_product=CG2-related_protein__putative:location=PfIT_12_v3:1291215-1294687(-):protein_length=1072:sequence_SO=chromosome:SO=protein_coding_seq27', 'PFIT_1232300.1-p1:transcript=PFIT_1232300.1:gene=PFIT_1232300:organism=Plasmodium_…
KEKQEKE	{'PF3D7_1335300.1-p1:transcript=PF3D7_1335300.1:gene=PF3D7_1335300:organism=Plasmodium_falciparum_3D7:gene_product=reticulocyte_binding_protein_2_homologue_b:transcript_product=reticulocyte_binding_protein_2_homologue_b:location=Pf3D7_13_v3:1428874-1438852(-):protein_length=3254:sequence_SO=chromosome:SO=protein_coding_seq108', 'PFCLINvar64_seq41', 'PF3D7_1335400.1-p1:transcript=PF3D7_1335400.1:g…
NEKNDKN	{'PF3D7_1434500.1-p1:transcript=PF3D7_1434500.1:gene=PF3D7_1434500:organism=Plasmodium_falciparum_3D7:gene_product=dynein-related_AAA-type_ATPase__putative:transcript_product=dynein-related_AAA-type_ATPase__putative:location=Pf3D7_14_v3:1378348-1402665(-):protein_length=8105:sequence_SO=chromosome:SO=protein_coding_seq290', 'PF3D7_1229600.1-p1:transcript=PF3D7_1229600.1:gene=PF3D7_1229600:organis…
NNSNKKN|NNSQKKN	{'PF3D7_0506500.1-p1:transcript=PF3D7_0506500.1:gene=PF3D7_0506500:organism=Plasmodium_falciparum_3D7:gene_product=conserved_Plasmodium_protein__unknown_function:transcript_product=conserved_Plasmodium_protein__unknown_function:location=Pf3D7_05_v3:265595-278345(+):protein_length=3980:sequence_SO=chromosome:SO=protein_coding_seq95', 'PF3D7_0506500.1-p1:transcript=PF3D7_0506500.1:gene=PF3D7_050650…
KKNDMKK	{'PFIT_1228500.1-p1:transcript=PFIT_1228500.1:gene=PFIT_1228500:organism=Plasmodium_falciparum_IT:gene_product=conserved_Plasmodium_protein__unknown_function:transcript_product=conserved_Plasmodium_protein__unknown_function:location=PfIT_12_v3:1121130-1130633(-):protein_length=3167:sequence_SO=chromosome:SO=protein_coding_seq78', 'PFIT_1228500.1-p1:transcript=PFIT_1228500.1:gene=PFIT_1228500:orga…
NIKSNNN	{'PF3D7_0827800.1-p1:transcript=PF3D7_0827800.1:gene=PF3D7_0827800:organism=Plasmodium_falciparum_3D7:gene_product=SET_domain_protein__putative:transcript_product=SET_domain_protein__putative:location=Pf3D7_08_v3:1198858-1206057(+):protein_length=2399:sequence_SO=chromosome:SO=protein_coding_seq3', 'PFIT_1241600.1-p1:transcript=PFIT_1241600.1:gene=PFIT_1241600:organism=Plasmodium_falciparum_IT:ge…
HNDGDGK|KNDGDGK	{'PF3D7_1123500.1-p1:transcript=PF3D7_1123500.1:gene=PF3D7_1123500:organism=Plasmodium_falciparum_3D7:gene_product=conserved_Plasmodium_protein__unknown_function:transcript_product=conserved_Plasmodium_protein__unknown_function:location=Pf3D7_11_v3:929354-933364(-):protein_length=1336:sequence_SO=chromosome:SO=protein_coding_seq12', 'PF3D7_0108700.1-p1:transcript=PF3D7_0108700.1:gene=PF3D7_010870…
GASPPAD	{'Plasmodiumfalciparum_AMA1_[K1_allele]_full-length_seq4', 'PF3D7_0930300.1-p1:transcript=PF3D7_0930300.1:gene=PF3D7_0930300:organism=Plasmodium_falciparum_3D7:gene_product=merozoite_surface_protein_1:transcript_product=merozoite_surface_protein_1:location=Pf3D7_09_v3:1201812-1206974(+):protein_length=1720:sequence_SO=chromosome:SO=protein_coding_seq5', 'PF3D7_0930300.1-p1:transcript=PF3D7_093030…
KDKKKKN	{"PF3D7_0222100.1-p1:transcript=PF3D7_0222100.1:gene=PF3D7_0222100:organism=Plasmodium_falciparum_3D7:gene_product=Pfmc-2TM_Maurer's_cleft_two_transmembrane_protein:transcript_product=Pfmc-2TM_Maurer's_cleft_two_transmembrane_protein:location=Pf3D7_02_v3:878468-879251(-):protein_length=229:sequence_SO=chromosome:SO=protein_coding_seq3", "PF3D7_1039700.1-p1:transcript=PF3D7_1039700.1:gene=PF3D7_10…
KNDGASC|KNDGGSC	{'PF3D7_0505700.1-p1:transcript=PF3D7_0505700.1:gene=PF3D7_0505700:organism=Plasmodium_falciparum_3D7:gene_product=conserved_Plasmodium_membrane_protein__unknown_function:transcript_product=conserved_Plasmodium_membrane_protein__unknown_function:location=Pf3D7_05_v3:247801-250575(-):protein_length=924:sequence_SO=chromosome:SO=protein_coding_seq13', 'IGHvar10_seq5', 'IGHvar10_seq4', 'PF3D7_050570…
PEEVAEE	{'PF3D7_1038400.1-p1:transcript=PF3D7_1038400.1:gene=PF3D7_1038400:organism=Plasmodium_falciparum_3D7:gene_product=gametocyte-specific_protein:transcript_product=gametocyte-specific_protein:location=Pf3D7_10_v3:1519021-1547825(+):protein_length=9563:sequence_SO=chromosome:SO=protein_coding_seq233', 'PF3D7_1035900.1-p1:transcript=PF3D7_1035900.1:gene=PF3D7_1035900:organism=Plasmodium_falciparum_3D…
EDVEEDI	{'PF3D7_0220000.1-p1:transcript=PF3D7_0220000.1:gene=PF3D7_0220000:organism=Plasmodium_falciparum_3D7:gene_product=liver_stage_antigen_3:transcript_product=liver_stage_antigen_3:location=Pf3D7_02_v3:796752-801586(+):protein_length=1558:sequence_SO=chromosome:SO=protein_coding_seq52', 'PF3D7_0220000.1-p1:transcript=PF3D7_0220000.1:gene=PF3D7_0220000:organism=Plasmodium_falciparum_3D7:gene_product=…
EKLILKE	{'PF3D7_1335400.1-p1:transcript=PF3D7_1335400.1:gene=PF3D7_1335400:organism=Plasmodium_falciparum_3D7:gene_product=reticulocyte_binding_protein_2_homologue_a:transcript_product=reticulocyte_binding_protein_2_homologue_a:location=Pf3D7_13_v3:1440779-1450385(+):protein_length=3130:sequence_SO=chromosome:SO=protein_coding_seq106', 'PF3D7_1335300.1-p1:transcript=PF3D7_1335300.1:gene=PF3D7_1335300:org…
NDKNEKI|NEKNEKI	{'PF3D7_1417200.1-p1:transcript=PF3D7_1417200.1:gene=PF3D7_1417200:organism=Plasmodium_falciparum_3D7:gene_product=NOT_family_protein__putative:transcript_product=NOT_family_protein__putative:location=Pf3D7_14_v3:694585-708177(+):protein_length=4466:sequence_SO=chromosome:SO=protein_coding_seq45', 'PF3D7_1417200.1-p1:transcript=PF3D7_1417200.1:gene=PF3D7_1417200:organism=Plasmodium_falciparum_3D7…
DDNKSDD	{'PFIT_0809600.1-p1:transcript=PFIT_0809600.1:gene=PFIT_0809600:organism=Plasmodium_falciparum_IT:gene_product=conserved_Plasmodium_membrane_protein__unknown_function:transcript_product=conserved_Plasmodium_membrane_protein__unknown_function:location=PfIT_08_v3:406485-414215(+):protein_length=2506:sequence_SO=chromosome:SO=protein_coding_seq75', 'PF3D7_0507800.1-p1:transcript=PF3D7_0507800.1:gene…
VNGNVNG	{'PF3D7_0407800.1-p1:transcript=PF3D7_0407800.1:gene=PF3D7_0407800:organism=Plasmodium_falciparum_3D7:gene_product=conserved_Plasmodium_protein__unknown_function:transcript_product=conserved_Plasmodium_protein__unknown_function:location=Pf3D7_04_v3:384924-390806(+):protein_length=1960:sequence_SO=chromosome:SO=protein_coding_seq47', 'PFIT_0515500.1-p1:transcript=PFIT_0515500.1:gene=PFIT_0515500:o…
NKEKNKI|NKEKNKL	{'PF3D7_1107300.1-p1:transcript=PF3D7_1107300.1:gene=PF3D7_1107300:organism=Plasmodium_falciparum_3D7:gene_product=polyadenylate-binding_protein-interacting_protein_1__putative:transcript_product=polyadenylate-binding_protein-interacting_protein_1__putative:location=Pf3D7_11_v3:301283-311287(-):protein_length=3334:sequence_SO=chromosome:SO=protein_coding_seq63', 'PF3D7_1107300.1-p1:transcript=PF3…
KKIGNNY|KKLGNNY	{'PFIT_0206900.1-p1:transcript=PFIT_0206900.1:gene=PFIT_0206900:organism=Plasmodium_falciparum_IT:gene_product=serine_repeat_antigen_5:transcript_product=serine_repeat_antigen_5:location=PfIT_02_v3:249818-253224(-):protein_length=984:sequence_SO=chromosome:SO=protein_coding_seq34', 'PF3D7_0504800.1-p1:transcript=PF3D7_0504800.1:gene=PF3D7_0504800:organism=Plasmodium_falciparum_3D7:gene_product=co…
DNDKKNK	{'PF3D7_1247500.1-p1:transcript=PF3D7_1247500.1:gene=PF3D7_1247500:organism=Plasmodium_falciparum_3D7:gene_product=serine/threonine_protein_kinase__putative:transcript_product=serine/threonine_protein_kinase__putative:location=Pf3D7_12_v3:1959612-1962341(+):protein_length=909:sequence_SO=chromosome:SO=protein_coding_seq20', 'PF3D7_1106700.1-p1:transcript=PF3D7_1106700.1:gene=PF3D7_1106700:organis…
KNNNNIK	{'PF3D7_0914500.1-p1:transcript=PF3D7_0914500.1:gene=PF3D7_0914500:organism=Plasmodium_falciparum_3D7:gene_product=conserved_Plasmodium_protein__unknown_function:transcript_product=conserved_Plasmodium_protein__unknown_function:location=Pf3D7_09_v3:620788-626149(-):protein_length=1728:sequence_SO=chromosome:SO=protein_coding_seq3', 'PF3D7_1112600.1-p1:transcript=PF3D7_1112600.1:gene=PF3D7_1112600…
NNKKNNN	{'PF3D7_1324300.1-p1:transcript=PF3D7_1324300.1:gene=PF3D7_1324300:organism=Plasmodium_falciparum_3D7:gene_product=conserved_Plasmodium_membrane_protein__unknown_function:transcript_product=conserved_Plasmodium_membrane_protein__unknown_function:location=Pf3D7_13_v3:1002748-1019303(-):protein_length=5415:sequence_SO=chromosome:SO=protein_coding_seq74', 'PF3D7_0809800.1-p1:transcript=PF3D7_0809800…
LKEEEER	{'PF3D7_1335400.1-p1:transcript=PF3D7_1335400.1:gene=PF3D7_1335400:organism=Plasmodium_falciparum_3D7:gene_product=reticulocyte_binding_protein_2_homologue_a:transcript_product=reticulocyte_binding_protein_2_homologue_a:location=Pf3D7_13_v3:1440779-1450385(+):protein_length=3130:sequence_SO=chromosome:SO=protein_coding_seq106', 'PF3D7_1335300.1-p1:transcript=PF3D7_1335300.1:gene=PF3D7_1335300:org…
DGSAFGG	{'DD2var25_seq139', 'IT4var31_seq65', 'IT4var31_seq64', 'PFIT_bin09600.1-p1:transcript=PFIT_bin09600.1:gene=PFIT_bin09600:organism=Plasmodium_falciparum_IT:gene_product=B_ITvar19_-_erythrocyte_membrane_protein_1__PfEMP1__putative:transcript_product=B_ITvar19_-_erythrocyte_membrane_protein_1__PfEMP1__putative:location=PfIT_bin_v3_archived_contig_27:17-4166(+):protein_length=1177:sequence_SO=random…
NKKHNND|NKKKNND	{'PF3D7_1471900.1-p1:transcript=PF3D7_1471900.1:gene=PF3D7_1471900:organism=Plasmodium_falciparum_3D7:gene_product=conserved_Plasmodium_protein__unknown_function:transcript_product=conserved_Plasmodium_protein__unknown_function:location=Pf3D7_14_v3:2933162-2939779(-):protein_length=2128:sequence_SO=chromosome:SO=protein_coding_seq19', 'PF3D7_0317300.1-p1:transcript=PF3D7_0317300.1:gene=PF3D7_0317…
NNNINGD	{'PF3D7_0310200.1-p1:transcript=PF3D7_0310200.1:gene=PF3D7_0310200:organism=Plasmodium_falciparum_3D7:gene_product=phd_finger_protein__putative:transcript_product=phd_finger_protein__putative:location=Pf3D7_03_v3:427290-440942(+):protein_length=4550:sequence_SO=chromosome:SO=protein_coding_seq51', 'PF3D7_0508100.1-p1:transcript=PF3D7_0508100.1:gene=PF3D7_0508100:organism=Plasmodium_falciparum_3D7…
TNENINS|TNENVNS	{'PF3D7_0722800.1-p1:transcript=PF3D7_0722800.1:gene=PF3D7_0722800:organism=Plasmodium_falciparum_3D7:gene_product=conserved_Plasmodium_protein__unknown_function:transcript_product=conserved_Plasmodium_protein__unknown_function:location=Pf3D7_07_v3:963370-965109(+):protein_length=579:sequence_SO=chromosome:SO=protein_coding_seq7', 'PF3D7_1410300.1-p1:transcript=PF3D7_1410300.1:gene=PF3D7_1410300:…
HVNVLYQ	{'PF3D7_1401000.1-p1:transcript=PF3D7_1401000.1:gene=PF3D7_1401000:organism=Plasmodium_falciparum_3D7:gene_product=glycophorin_binding_protein:transcript_product=glycophorin_binding_protein:location=Pf3D7_14_v3:34693-35773(-):protein_length=307:sequence_SO=chromosome:SO=protein_coding_seq11', 'PF3D7_1401000.1-p1:transcript=PF3D7_1401000.1:gene=PF3D7_1401000:organism=Plasmodium_falciparum_3D7:gene…
KDLGDEK	{'PF3D7_1335400.1-p1:transcript=PF3D7_1335400.1:gene=PF3D7_1335400:organism=Plasmodium_falciparum_3D7:gene_product=reticulocyte_binding_protein_2_homologue_a:transcript_product=reticulocyte_binding_protein_2_homologue_a:location=Pf3D7_13_v3:1440779-1450385(+):protein_length=3130:sequence_SO=chromosome:SO=protein_coding_seq106', 'PF3D7_1335300.1-p1:transcript=PF3D7_1335300.1:gene=PF3D7_1335300:org…
GDNKLIG|GDNKLVG	{'IGHvar34_seq31', 'PFIT_1232300.1-p1:transcript=PFIT_1232300.1:gene=PFIT_1232300:organism=Plasmodium_falciparum_IT:gene_product=CG2-related_protein__putative:transcript_product=CG2-related_protein__putative:location=PfIT_12_v3:1291215-1294687(-):protein_length=1072:sequence_SO=chromosome:SO=protein_coding_seq28', 'PFIT_1232300.1-p1:transcript=PFIT_1232300.1:gene=PFIT_1232300:organism=Plasmodium_…
EEDDKYT|EEDEKYT	{'PF3D7_1415600.1-p1:transcript=PF3D7_1415600.1:gene=PF3D7_1415600:organism=Plasmodium_falciparum_3D7:gene_product=conserved_Plasmodium_protein__unknown_function:transcript_product=conserved_Plasmodium_protein__unknown_function:location=Pf3D7_14_v3:629419-632895(-):protein_length=1158:sequence_SO=chromosome:SO=protein_coding_seq36', 'PF3D7_1014900.1-p1:transcript=PF3D7_1014900.1:gene=PF3D7_101490…
KKKENVT|RKKENVT	{'PF3D7_1124300.1-p1:transcript=PF3D7_1124300.1:gene=PF3D7_1124300:organism=Plasmodium_falciparum_3D7:gene_product=conserved_Plasmodium_protein__unknown_function:transcript_product=conserved_Plasmodium_protein__unknown_function:location=Pf3D7_11_v3:962156-963958(+):protein_length=525:sequence_SO=chromosome:SO=protein_coding_seq8', 'PF3D7_0113300.1-p1:transcript=PF3D7_0113300.1:gene=PF3D7_0113300:…
KLILKEE	{'PF3D7_1335400.1-p1:transcript=PF3D7_1335400.1:gene=PF3D7_1335400:organism=Plasmodium_falciparum_3D7:gene_product=reticulocyte_binding_protein_2_homologue_a:transcript_product=reticulocyte_binding_protein_2_homologue_a:location=Pf3D7_13_v3:1440779-1450385(+):protein_length=3130:sequence_SO=chromosome:SO=protein_coding_seq106', 'PF3D7_1335300.1-p1:transcript=PF3D7_1335300.1:gene=PF3D7_1335300:org…
DNINDNI|DNINDNL	{'PF3D7_1343900.1-p1:transcript=PF3D7_1343900.1:gene=PF3D7_1343900:organism=Plasmodium_falciparum_3D7:gene_product=U4/U6_small_nuclear_ribonucleoprotein_PRP4__putative:transcript_product=U4/U6_small_nuclear_ribonucleoprotein_PRP4__putative:location=Pf3D7_13_v3:1756212-1758158(+):protein_length=648:sequence_SO=chromosome:SO=protein_coding_seq15', 'PF3D7_1343900.1-p1:transcript=PF3D7_1343900.1:gene…
NDDIKND	{'PF3D7_0629700.1-p1:transcript=PF3D7_0629700.1:gene=PF3D7_0629700:organism=Plasmodium_falciparum_3D7:gene_product=SET_domain_protein__putative:transcript_product=SET_domain_protein__putative:location=Pf3D7_06_v3:1221941-1242922(+):protein_length=6753:sequence_SO=chromosome:SO=protein_coding_seq63', 'PF3D7_1359700.1-p1:transcript=PF3D7_1359700.1:gene=PF3D7_1359700:organism=Plasmodium_falciparum_3…
EIKNFKN|EIKNFRN	{'PF3D7_0406500.1-p1:transcript=PF3D7_0406500.1:gene=PF3D7_0406500:organism=Plasmodium_falciparum_3D7:gene_product=NYN_domain-containing_protein__putative:transcript_product=NYN_domain-containing_protein__putative:location=Pf3D7_04_v3:334282-344054(-):protein_length=3211:sequence_SO=chromosome:SO=protein_coding_seq43', 'PF3D7_0406500.1-p1:transcript=PF3D7_0406500.1:gene=PF3D7_0406500:organism=Pla…
GIKNIDG|GIKNVDG	{'PF3D7_1203300.1-p1:transcript=PF3D7_1203300.1:gene=PF3D7_1203300:organism=Plasmodium_falciparum_3D7:gene_product=conserved_Plasmodium_protein__unknown_function:transcript_product=conserved_Plasmodium_protein__unknown_function:location=Pf3D7_12_v3:173875-176853(-):protein_length=992:sequence_SO=chromosome:SO=protein_coding_seq9', 'PF3D7_1203300.1-p1:transcript=PF3D7_1203300.1:gene=PF3D7_1203300:…
IKNDDIK|IKNDDIR	{'PF3D7_1359700.1-p1:transcript=PF3D7_1359700.1:gene=PF3D7_1359700:organism=Plasmodium_falciparum_3D7:gene_product=conserved_Plasmodium_protein__unknown_function:transcript_product=conserved_Plasmodium_protein__unknown_function:location=Pf3D7_13_v3:2381165-2392261(+):protein_length=3698:sequence_SO=chromosome:SO=protein_coding_seq37', 'PF3D7_1359700.1-p1:transcript=PF3D7_1359700.1:gene=PF3D7_1359…
DNYNIKN	{'PFIT_1228500.1-p1:transcript=PFIT_1228500.1:gene=PFIT_1228500:organism=Plasmodium_falciparum_IT:gene_product=conserved_Plasmodium_protein__unknown_function:transcript_product=conserved_Plasmodium_protein__unknown_function:location=PfIT_12_v3:1121130-1130633(-):protein_length=3167:sequence_SO=chromosome:SO=protein_coding_seq78', 'PFIT_1228500.1-p1:transcript=PFIT_1228500.1:gene=PFIT_1228500:orga…
KRNNKKR	{'PF3D7_0906700.1-p1:transcript=PF3D7_0906700.1:gene=PF3D7_0906700:organism=Plasmodium_falciparum_3D7:gene_product=leucine-rich_repeat_protein:transcript_product=leucine-rich_repeat_protein:location=Pf3D7_09_v3:330499-331965(-):protein_length=488:sequence_SO=chromosome:SO=protein_coding_seq3', 'PF3D7_1334500.1-p1:transcript=PF3D7_1334500.1:gene=PF3D7_1334500:organism=Plasmodium_falciparum_3D7:gen…
VEEVVEE	{'PF3D7_1038400.1-p1:transcript=PF3D7_1038400.1:gene=PF3D7_1038400:organism=Plasmodium_falciparum_3D7:gene_product=gametocyte-specific_protein:transcript_product=gametocyte-specific_protein:location=Pf3D7_10_v3:1519021-1547825(+):protein_length=9563:sequence_SO=chromosome:SO=protein_coding_seq211', 'PF3D7_1038400.1-p1:transcript=PF3D7_1038400.1:gene=PF3D7_1038400:organism=Plasmodium_falciparum_3D…
NEEEITT	{'PF3D7_0930300.1-p1:transcript=PF3D7_0930300.1:gene=PF3D7_0930300:organism=Plasmodium_falciparum_3D7:gene_product=merozoite_surface_protein_1:transcript_product=merozoite_surface_protein_1:location=Pf3D7_09_v3:1201812-1206974(+):protein_length=1720:sequence_SO=chromosome:SO=protein_coding_seq3', 'Plasmodiumfalciparum_AMA1_[K1_allele]_full-length_seq2', 'PF3D7_0930300.1-p1:transcript=PF3D7_093030…
DDIKKDD	{'PF3D7_0310200.1-p1:transcript=PF3D7_0310200.1:gene=PF3D7_0310200:organism=Plasmodium_falciparum_3D7:gene_product=phd_finger_protein__putative:transcript_product=phd_finger_protein__putative:location=Pf3D7_03_v3:427290-440942(+):protein_length=4550:sequence_SO=chromosome:SO=protein_coding_seq159', 'PF3D7_0310200.1-p1:transcript=PF3D7_0310200.1:gene=PF3D7_0310200:organism=Plasmodium_falciparum_3D…
DPEGQIM	{'PF3D7_1016300.1-p1:transcript=PF3D7_1016300.1:gene=PF3D7_1016300:organism=Plasmodium_falciparum_3D7:gene_product=glycophorin_binding_protein:transcript_product=glycophorin_binding_protein:location=Pf3D7_10_v3:650898-653567(-):protein_length=824:sequence_SO=chromosome:SO=protein_coding_seq31', 'PF3D7_1016300.1-p1:transcript=PF3D7_1016300.1:gene=PF3D7_1016300:organism=Plasmodium_falciparum_3D7:ge…
RERIEKE	{'PF3D7_1335300.1-p1:transcript=PF3D7_1335300.1:gene=PF3D7_1335300:organism=Plasmodium_falciparum_3D7:gene_product=reticulocyte_binding_protein_2_homologue_b:transcript_product=reticulocyte_binding_protein_2_homologue_b:location=Pf3D7_13_v3:1428874-1438852(-):protein_length=3254:sequence_SO=chromosome:SO=protein_coding_seq108', 'PF3D7_1335400.1-p1:transcript=PF3D7_1335400.1:gene=PF3D7_1335400:org…
NVNGNIN|NVNGNVN	{'PF3D7_0407800.1-p1:transcript=PF3D7_0407800.1:gene=PF3D7_0407800:organism=Plasmodium_falciparum_3D7:gene_product=conserved_Plasmodium_protein__unknown_function:transcript_product=conserved_Plasmodium_protein__unknown_function:location=Pf3D7_04_v3:384924-390806(+):protein_length=1960:sequence_SO=chromosome:SO=protein_coding_seq47', 'PFIT_0515500.1-p1:transcript=PFIT_0515500.1:gene=PFIT_0515500:o…
RSNTSSG	{'Plasmodiumfalciparum_AMA1_[K1_allele]_full-length_seq4', 'PF3D7_0930300.1-p1:transcript=PF3D7_0930300.1:gene=PF3D7_0930300:organism=Plasmodium_falciparum_3D7:gene_product=merozoite_surface_protein_1:transcript_product=merozoite_surface_protein_1:location=Pf3D7_09_v3:1201812-1206974(+):protein_length=1720:sequence_SO=chromosome:SO=protein_coding_seq5', 'PF3D7_0930300.1-p1:transcript=PF3D7_093030…
SGTSGPS	{'PF3D7_0930300.1-p1:transcript=PF3D7_0930300.1:gene=PF3D7_0930300:organism=Plasmodium_falciparum_3D7:gene_product=merozoite_surface_protein_1:transcript_product=merozoite_surface_protein_1:location=Pf3D7_09_v3:1201812-1206974(+):protein_length=1720:sequence_SO=chromosome:SO=protein_coding_seq3', 'Plasmodiumfalciparum_AMA1_[K1_allele]_full-length_seq2', 'PF3D7_0930300.1-p1:transcript=PF3D7_093030…
VKEDIIK	{'PFIT_0713300.1-p1:transcript=PFIT_0713300.1:gene=PFIT_0713300:organism=Plasmodium_falciparum_IT:gene_product=conserved_Plasmodium_protein__unknown_function:transcript_product=conserved_Plasmodium_protein__unknown_function:location=PfIT_07_v3:662284-668904(-):protein_length=2206:sequence_SO=chromosome:SO=protein_coding_seq20', 'PF3D7_0715200.1-p1:transcript=PF3D7_0715200.1:gene=PF3D7_0715200:org…
TNDDIIN|TNDDLIN	{'PF3D7_0613800.1-p1:transcript=PF3D7_0613800.1:gene=PF3D7_0613800:organism=Plasmodium_falciparum_3D7:gene_product=AP2_domain_transcription_factor__putative:transcript_product=AP2_domain_transcription_factor__putative:location=Pf3D7_06_v3:566139-578993(+):protein_length=4109:sequence_SO=chromosome:SO=protein_coding_seq47', 'PF3D7_0422200.1-p1:transcript=PF3D7_0422200.1:gene=PF3D7_0422200:organism…
IMSGENI	{'PF3D7_1342900.1-p1:transcript=PF3D7_1342900.1:gene=PF3D7_1342900:organism=Plasmodium_falciparum_3D7:gene_product=AP2_domain_transcription_factor__putative:transcript_product=AP2_domain_transcription_factor__putative:location=Pf3D7_13_v3:1682393-1693969(-):protein_length=3858:sequence_SO=chromosome:SO=protein_coding_seq27', 'PFIT_1342100.1-p1:transcript=PFIT_1342100.1:gene=PFIT_1342100:organism=…
ISNDNNN	{'PF3D7_0702300.1-p1:transcript=PF3D7_0702300.1:gene=PF3D7_0702300:organism=Plasmodium_falciparum_3D7:gene_product=sporozoite_threonine_and_asparagine-rich_protein:transcript_product=sporozoite_threonine_and_asparagine-rich_protein:location=Pf3D7_07_v3:96761-98730(+):protein_length=594:sequence_SO=chromosome:SO=protein_coding_seq19', 'PF3D7_0702300.1-p1:transcript=PF3D7_0702300.1:gene=PF3D7_07023…
NKNIQNK|NKNIQNR	{'PFIT_0207700.1-p1:transcript=PFIT_0207700.1:gene=PFIT_0207700:organism=Plasmodium_falciparum_IT:gene_product=conserved_Plasmodium_protein__unknown_function:transcript_product=conserved_Plasmodium_protein__unknown_function:location=PfIT_02_v3:289128-295184(-):protein_length=2018:sequence_SO=chromosome:SO=protein_coding_seq49', 'PFIT_0207700.1-p1:transcript=PFIT_0207700.1:gene=PFIT_0207700:organi…
NNINNID|NNINNIE	{'PF3D7_1120600.1-p1:transcript=PF3D7_1120600.1:gene=PF3D7_1120600:organism=Plasmodium_falciparum_3D7:gene_product=conserved_Plasmodium_protein__unknown_function:transcript_product=conserved_Plasmodium_protein__unknown_function:location=Pf3D7_11_v3:775233-783639(-):protein_length=2545:sequence_SO=chromosome:SO=protein_coding_seq87', 'PFIT_0601000.1-p1:transcript=PFIT_0601000.1:gene=PFIT_0601000:o…
SEKLNHS|SEKVNHS	{'PF3D7_0220100.1-p1:transcript=PF3D7_0220100.1:gene=PF3D7_0220100:organism=Plasmodium_falciparum_3D7:gene_product=DnaJ_protein__putative:transcript_product=DnaJ_protein__putative:location=Pf3D7_02_v3:804520-807741(+):protein_length=997:sequence_SO=chromosome:SO=protein_coding_seq20', 'PF3D7_0220100.1-p1:transcript=PF3D7_0220100.1:gene=PF3D7_0220100:organism=Plasmodium_falciparum_3D7:gene_product…
AADPEYR	{'PF3D7_1016300.1-p1:transcript=PF3D7_1016300.1:gene=PF3D7_1016300:organism=Plasmodium_falciparum_3D7:gene_product=glycophorin_binding_protein:transcript_product=glycophorin_binding_protein:location=Pf3D7_10_v3:650898-653567(-):protein_length=824:sequence_SO=chromosome:SO=protein_coding_seq31', 'PF3D7_1016300.1-p1:transcript=PF3D7_1016300.1:gene=PF3D7_1016300:organism=Plasmodium_falciparum_3D7:ge…
EEVVSEE	{'PF3D7_1038400.1-p1:transcript=PF3D7_1038400.1:gene=PF3D7_1038400:organism=Plasmodium_falciparum_3D7:gene_product=gametocyte-specific_protein:transcript_product=gametocyte-specific_protein:location=Pf3D7_10_v3:1519021-1547825(+):protein_length=9563:sequence_SO=chromosome:SO=protein_coding_seq95', 'PF3D7_1038400.1-p1:transcript=PF3D7_1038400.1:gene=PF3D7_1038400:organism=Plasmodium_falciparum_3D7…
VAEELIE	{'PF3D7_1038400.1-p1:transcript=PF3D7_1038400.1:gene=PF3D7_1038400:organism=Plasmodium_falciparum_3D7:gene_product=gametocyte-specific_protein:transcript_product=gametocyte-specific_protein:location=Pf3D7_10_v3:1519021-1547825(+):protein_length=9563:sequence_SO=chromosome:SO=protein_coding_seq211', 'PF3D7_1035900.1-p1:transcript=PF3D7_1035900.1:gene=PF3D7_1035900:organism=Plasmodium_falciparum_3D…
YNEQNEQ	{'PF3D7_0203000.1-p1:transcript=PF3D7_0203000.1:gene=PF3D7_0203000:organism=Plasmodium_falciparum_3D7:gene_product=repetitive_organellar_protein__putative:transcript_product=repetitive_organellar_protein__putative:location=Pf3D7_02_v3:141625-147564(-):protein_length=1979:sequence_SO=chromosome:SO=protein_coding_seq72', 'PF3D7_1342900.1-p1:transcript=PF3D7_1342900.1:gene=PF3D7_1342900:organism=Pla…
KIKNNNY|KLKNNNY	{'PREICHvar71_seq16', 'PF3D7_1362400.1-p1:transcript=PF3D7_1362400.1:gene=PF3D7_1362400:organism=Plasmodium_falciparum_3D7:gene_product=calpain:transcript_product=calpain:location=Pf3D7_13_v3:2495924-2502070(+):protein_length=2048:sequence_SO=chromosome:SO=protein_coding_seq34', 'PREICHvar71_seq17'}
LGWEFGG	{'PF3D7_1035500.1-p1:transcript=PF3D7_1035500.1:gene=PF3D7_1035500:organism=Plasmodium_falciparum_3D7:gene_product=merozoite_surface_protein_6:transcript_product=merozoite_surface_protein_6:location=Pf3D7_10_v3:1407276-1408391(+):protein_length=371:sequence_SO=chromosome:SO=protein_coding_seq7', 'PF3D7_1035400.1-p1:transcript=PF3D7_1035400.1:gene=PF3D7_1035400:organism=Plasmodium_falciparum_3D7:g…
NEKTNEK	{'PFIT_0909100.1-p1:transcript=PFIT_0909100.1:gene=PFIT_0909100:organism=Plasmodium_falciparum_IT:gene_product=conserved_Plasmodium_protein__unknown_function:transcript_product=conserved_Plasmodium_protein__unknown_function:location=PfIT_09_v3:389109-392246(-):protein_length=993:sequence_SO=chromosome:SO=protein_coding_seq13', 'PF3D7_0604500.1-p1:transcript=PF3D7_0604500.1:gene=PF3D7_0604500:orga…
SEKVNHS	{'PF3D7_0220100.1-p1:transcript=PF3D7_0220100.1:gene=PF3D7_0220100:organism=Plasmodium_falciparum_3D7:gene_product=DnaJ_protein__putative:transcript_product=DnaJ_protein__putative:location=Pf3D7_02_v3:804520-807741(+):protein_length=997:sequence_SO=chromosome:SO=protein_coding_seq20', 'PF3D7_0220100.1-p1:transcript=PF3D7_0220100.1:gene=PF3D7_0220100:organism=Plasmodium_falciparum_3D7:gene_product…
KNKSKSN	{'PF3D7_0501400.1-p1:transcript=PF3D7_0501400.1:gene=PF3D7_0501400:organism=Plasmodium_falciparum_3D7:gene_product=interspersed_repeat_antigen:transcript_product=interspersed_repeat_antigen:location=Pf3D7_05_v3:74509-79842(+):protein_length=1720:sequence_SO=chromosome:SO=protein_coding_seq68', 'PF3D7_0501400.1-p1:transcript=PF3D7_0501400.1:gene=PF3D7_0501400:organism=Plasmodium_falciparum_3D7:gen…
KNNNNKK|KNQNNKK	{'PF3D7_1321100.1-p1:transcript=PF3D7_1321100.1:gene=PF3D7_1321100:organism=Plasmodium_falciparum_3D7:gene_product=conserved_Plasmodium_protein__unknown_function:transcript_product=conserved_Plasmodium_protein__unknown_function:location=Pf3D7_13_v3:861442-872332(-):protein_length=3447:sequence_SO=chromosome:SO=protein_coding_seq6', 'PF3D7_1456000.1-p1:transcript=PF3D7_1456000.1:gene=PF3D7_1456000…
RVKKKNN|RVKKRNN	{'PF3D7_0622900.1-p1:transcript=PF3D7_0622900.1:gene=PF3D7_0622900:organism=Plasmodium_falciparum_3D7:gene_product=AP2_domain_transcription_factor_AP2-SP3__putative:transcript_product=AP2_domain_transcription_factor_AP2-SP3__putative:location=Pf3D7_06_v3:925105-931074(-):protein_length=1989:sequence_SO=chromosome:SO=protein_coding_seq53', 'PF3D7_0500800.1-p1:transcript=PF3D7_0500800.1:gene=PF3D7_…
KKKKNNN|KKRKNNN	{'PF3D7_1107600.1-p1:transcript=PF3D7_1107600.1:gene=PF3D7_1107600:organism=Plasmodium_falciparum_3D7:gene_product=conserved_Plasmodium_protein__unknown_function:transcript_product=conserved_Plasmodium_protein__unknown_function:location=Pf3D7_11_v3:321886-325323(-):protein_length=1145:sequence_SO=chromosome:SO=protein_coding_seq3', 'PF3D7_1018800.1-p1:transcript=PF3D7_1018800.1:gene=PF3D7_1018800…
EDDKNEK	{'PF3D7_1035300.1-p1:transcript=PF3D7_1035300.1:gene=PF3D7_1035300:organism=Plasmodium_falciparum_3D7:gene_product=glutamate-rich_protein:transcript_product=glutamate-rich_protein:location=Pf3D7_10_v3:1399195-1402896(+):protein_length=1233:sequence_SO=chromosome:SO=protein_coding_seq36', 'PF3D7_1035300.1-p1:transcript=PF3D7_1035300.1:gene=PF3D7_1035300:organism=Plasmodium_falciparum_3D7:gene_prod…
YSEKVNH	{'PF3D7_0220100.1-p1:transcript=PF3D7_0220100.1:gene=PF3D7_0220100:organism=Plasmodium_falciparum_3D7:gene_product=DnaJ_protein__putative:transcript_product=DnaJ_protein__putative:location=Pf3D7_02_v3:804520-807741(+):protein_length=997:sequence_SO=chromosome:SO=protein_coding_seq17', 'PF3D7_0220100.1-p1:transcript=PF3D7_0220100.1:gene=PF3D7_0220100:organism=Plasmodium_falciparum_3D7:gene_product…
KEIKNFK|KEIKNFR	{'PF3D7_0406500.1-p1:transcript=PF3D7_0406500.1:gene=PF3D7_0406500:organism=Plasmodium_falciparum_3D7:gene_product=NYN_domain-containing_protein__putative:transcript_product=NYN_domain-containing_protein__putative:location=Pf3D7_04_v3:334282-344054(-):protein_length=3211:sequence_SO=chromosome:SO=protein_coding_seq43', 'PF3D7_0406500.1-p1:transcript=PF3D7_0406500.1:gene=PF3D7_0406500:organism=Pla…
LLFDLEK	{'PF3D7_1149200.1-p1:transcript=PF3D7_1149200.1:gene=PF3D7_1149200:organism=Plasmodium_falciparum_3D7:gene_product=ring-infected_erythrocyte_surface_antigen:transcript_product=ring-infected_erythrocyte_surface_antigen:location=Pf3D7_11_v3:1976407-1979804(+):protein_length=1090:sequence_SO=chromosome:SO=protein_coding_seq17', 'PF3D7_0102200.1-p1:transcript=PF3D7_0102200.1:gene=PF3D7_0102200:organi…
LYPRHPG	{'PFIT_1478600.1-p1:transcript=PFIT_1478600.1:gene=PFIT_1478600:organism=Plasmodium_falciparum_IT:gene_product=Plasmodium_exported_protein_(PHISTb)__unknown_function:transcript_product=Plasmodium_exported_protein_(PHISTb)__unknown_function:location=PfIT_14_v3:3210330-3211978(+):protein_length=494:sequence_SO=chromosome:SO=protein_coding_seq16', 'PF3D7_1477500.1-p1:transcript=PF3D7_1477500.1:gene=…
KEKDDNY	{'PFIT_1228500.1-p1:transcript=PFIT_1228500.1:gene=PFIT_1228500:organism=Plasmodium_falciparum_IT:gene_product=conserved_Plasmodium_protein__unknown_function:transcript_product=conserved_Plasmodium_protein__unknown_function:location=PfIT_12_v3:1121130-1130633(-):protein_length=3167:sequence_SO=chromosome:SO=protein_coding_seq78', 'PFIT_1228500.1-p1:transcript=PFIT_1228500.1:gene=PFIT_1228500:orga…
EEERKER	{'PF3D7_1335300.1-p1:transcript=PF3D7_1335300.1:gene=PF3D7_1335300:organism=Plasmodium_falciparum_3D7:gene_product=reticulocyte_binding_protein_2_homologue_b:transcript_product=reticulocyte_binding_protein_2_homologue_b:location=Pf3D7_13_v3:1428874-1438852(-):protein_length=3254:sequence_SO=chromosome:SO=protein_coding_seq108', 'PF3D7_1335400.1-p1:transcript=PF3D7_1335400.1:gene=PF3D7_1335400:org…
DLYPRHP	{'PFIT_1478600.1-p1:transcript=PFIT_1478600.1:gene=PFIT_1478600:organism=Plasmodium_falciparum_IT:gene_product=Plasmodium_exported_protein_(PHISTb)__unknown_function:transcript_product=Plasmodium_exported_protein_(PHISTb)__unknown_function:location=PfIT_14_v3:3210330-3211978(+):protein_length=494:sequence_SO=chromosome:SO=protein_coding_seq16', 'PF3D7_1477500.1-p1:transcript=PF3D7_1477500.1:gene=…
LILKEEE	{'PF3D7_1335400.1-p1:transcript=PF3D7_1335400.1:gene=PF3D7_1335400:organism=Plasmodium_falciparum_3D7:gene_product=reticulocyte_binding_protein_2_homologue_a:transcript_product=reticulocyte_binding_protein_2_homologue_a:location=Pf3D7_13_v3:1440779-1450385(+):protein_length=3130:sequence_SO=chromosome:SO=protein_coding_seq106', 'PF3D7_1335300.1-p1:transcript=PF3D7_1335300.1:gene=PF3D7_1335300:org…
YKNDKND	{'PF3D7_1441300.1-p1:transcript=PF3D7_1441300.1:gene=PF3D7_1441300:organism=Plasmodium_falciparum_3D7:gene_product=serine/threonine_protein_kinase__putative:transcript_product=serine/threonine_protein_kinase__putative:location=Pf3D7_14_v3:1681791-1689157(+):protein_length=2247:sequence_SO=chromosome:SO=protein_coding_seq80', 'PF3D7_1441300.1-p1:transcript=PF3D7_1441300.1:gene=PF3D7_1441300:organi…
DDVKDDV	{'PF3D7_0310200.1-p1:transcript=PF3D7_0310200.1:gene=PF3D7_0310200:organism=Plasmodium_falciparum_3D7:gene_product=phd_finger_protein__putative:transcript_product=phd_finger_protein__putative:location=Pf3D7_03_v3:427290-440942(+):protein_length=4550:sequence_SO=chromosome:SO=protein_coding_seq155', 'PF3D7_0310200.1-p1:transcript=PF3D7_0310200.1:gene=PF3D7_0310200:organism=Plasmodium_falciparum_3D…
SSGASPP	{'Plasmodiumfalciparum_AMA1_[K1_allele]_full-length_seq4', 'PF3D7_0930300.1-p1:transcript=PF3D7_0930300.1:gene=PF3D7_0930300:organism=Plasmodium_falciparum_3D7:gene_product=merozoite_surface_protein_1:transcript_product=merozoite_surface_protein_1:location=Pf3D7_09_v3:1201812-1206974(+):protein_length=1720:sequence_SO=chromosome:SO=protein_coding_seq5', 'PF3D7_0930300.1-p1:transcript=PF3D7_093030…
DIQSDGI	{'PFI0005w_D6_seq5', 'PFL0020w_D8_seq6', 'PFD0005w_D7_seq6', 'PFIT_0400100.1-p1:transcript=PFIT_0400100.1:gene=PFIT_0400100:organism=Plasmodium_falciparum_IT:gene_product=rifin:transcript_product=rifin:location=PfIT_04_v3:117611-118957(+):protein_length=370:sequence_SO=chromosome:SO=protein_coding_seq4', 'PFD0005w_D7_seq7', 'PF3D7_0900100.1-p1:transcript=PF3D7_0900100.1:gene=PF3D7_0900100:organis…
GASAQSG	{'Plasmodiumfalciparum_AMA1_[K1_allele]_full-length_seq3', 'Plasmodiumfalciparum_AMA1_[K1_allele]_full-length_seq2', 'PF3D7_0930300.1-p1:transcript=PF3D7_0930300.1:gene=PF3D7_0930300:organism=Plasmodium_falciparum_3D7:gene_product=merozoite_surface_protein_1:transcript_product=merozoite_surface_protein_1:location=Pf3D7_09_v3:1201812-1206974(+):protein_length=1720:sequence_SO=chromosome:SO=protein…
KKNNNNK	{'PF3D7_0108300.1-p1:transcript=PF3D7_0108300.1:gene=PF3D7_0108300:organism=Plasmodium_falciparum_3D7:gene_product=conserved_Plasmodium_protein__unknown_function:transcript_product=conserved_Plasmodium_protein__unknown_function:location=Pf3D7_01_v3:337168-343833(+):protein_length=2221:sequence_SO=chromosome:SO=protein_coding_seq37', 'PF3D7_0108300.1-p1:transcript=PF3D7_0108300.1:gene=PF3D7_010830…
NGKNEKN	{'PF3D7_0516000.1-p1:transcript=PF3D7_0516000.1:gene=PF3D7_0516000:organism=Plasmodium_falciparum_3D7:gene_product=RAP_protein__putative:transcript_product=RAP_protein__putative:location=Pf3D7_05_v3:663551-666917(+):protein_length=1084:sequence_SO=chromosome:SO=protein_coding_seq10', 'PF3D7_0319700.1-p1:transcript=PF3D7_0319700.1:gene=PF3D7_0319700:organism=Plasmodium_falciparum_3D7:gene_product=…
ITNSKKK|LTNSKKK	{'PFIT_1240500.1-p1:transcript=PFIT_1240500.1:gene=PFIT_1240500:organism=Plasmodium_falciparum_IT:gene_product=erythrocyte_membrane_protein_1__PfEMP1:transcript_product=erythrocyte_membrane_protein_1__PfEMP1:location=PfIT_12_v3:1670057-1678296(+):protein_length=2429:sequence_SO=chromosome:SO=protein_coding_seq34', 'HB3var22_seq66', 'PFIT_1240500.1-p1:transcript=PFIT_1240500.1:gene=PFIT_1240500:or…
IEEVVEE	{'PF3D7_1038400.1-p1:transcript=PF3D7_1038400.1:gene=PF3D7_1038400:organism=Plasmodium_falciparum_3D7:gene_product=gametocyte-specific_protein:transcript_product=gametocyte-specific_protein:location=Pf3D7_10_v3:1519021-1547825(+):protein_length=9563:sequence_SO=chromosome:SO=protein_coding_seq183', 'PF3D7_1035900.1-p1:transcript=PF3D7_1035900.1:gene=PF3D7_1035900:organism=Plasmodium_falciparum_3D…
SEGSESD|TEGSESD	{'PF3D7_1250100.1-p1:transcript=PF3D7_1250100.1:gene=PF3D7_1250100:organism=Plasmodium_falciparum_3D7:gene_product=osmiophilic_body_protein_G377:transcript_product=osmiophilic_body_protein_G377:location=Pf3D7_12_v3:2045070-2054429(-):protein_length=3119:sequence_SO=chromosome:SO=protein_coding_seq43', 'PFIT_0101000.1-p1:transcript=PFIT_0101000.1:gene=PFIT_0101000:organism=Plasmodium_falciparum_IT…
EEALKRQ	{'PF3D7_1335400.1-p1:transcript=PF3D7_1335400.1:gene=PF3D7_1335400:organism=Plasmodium_falciparum_3D7:gene_product=reticulocyte_binding_protein_2_homologue_a:transcript_product=reticulocyte_binding_protein_2_homologue_a:location=Pf3D7_13_v3:1440779-1450385(+):protein_length=3130:sequence_SO=chromosome:SO=protein_coding_seq110', 'PF3D7_1335400.1-p1:transcript=PF3D7_1335400.1:gene=PF3D7_1335400:org…
KDISNKD	{'PF3D7_0201900.1-p1:transcript=PF3D7_0201900.1:gene=PF3D7_0201900:organism=Plasmodium_falciparum_3D7:gene_product=erythrocyte_membrane_protein_3:transcript_product=erythrocyte_membrane_protein_3:location=Pf3D7_02_v3:91318-98838(-):protein_length=2441:sequence_SO=chromosome:SO=protein_coding_seq52', 'PF3D7_0201900.1-p1:transcript=PF3D7_0201900.1:gene=PF3D7_0201900:organism=Plasmodium_falciparum_3…
KEEEHKE	{'PF3D7_0113000.1-p1:transcript=PF3D7_0113000.1:gene=PF3D7_0113000:organism=Plasmodium_falciparum_3D7:gene_product=glutamic_acid-rich_protein:transcript_product=glutamic_acid-rich_protein:location=Pf3D7_01_v3:487892-490127(-):protein_length=673:sequence_SO=chromosome:SO=protein_coding_seq14', 'PF3D7_1309400.1-p1:transcript=PF3D7_1309400.1:gene=PF3D7_1309400:organism=Plasmodium_falciparum_3D7:gene…
NVNIDKN|NVNIEKN	{'PF3D7_1312700.1-p1:transcript=PF3D7_1312700.1:gene=PF3D7_1312700:organism=Plasmodium_falciparum_3D7:gene_product=conserved_Plasmodium_protein__unknown_function:transcript_product=conserved_Plasmodium_protein__unknown_function:location=Pf3D7_13_v3:532270-533958(-):protein_length=562:sequence_SO=chromosome:SO=protein_coding_seq9', 'PFIT_0522600.1-p1:transcript=PFIT_0522600.1:gene=PFIT_0522600:org…
ADPEYRK	{'PF3D7_1016300.1-p1:transcript=PF3D7_1016300.1:gene=PF3D7_1016300:organism=Plasmodium_falciparum_3D7:gene_product=glycophorin_binding_protein:transcript_product=glycophorin_binding_protein:location=Pf3D7_10_v3:650898-653567(-):protein_length=824:sequence_SO=chromosome:SO=protein_coding_seq31', 'PF3D7_1016300.1-p1:transcript=PF3D7_1016300.1:gene=PF3D7_1016300:organism=Plasmodium_falciparum_3D7:ge…
MKNMKNI	{'PF3D7_1143100.1-p1:transcript=PF3D7_1143100.1:gene=PF3D7_1143100:organism=Plasmodium_falciparum_3D7:gene_product=AP2_domain_transcription_factor_AP2-O__putative:transcript_product=AP2_domain_transcription_factor_AP2-O__putative:location=Pf3D7_11_v3:1720047-1724861(-):protein_length=1604:sequence_SO=chromosome:SO=protein_coding_seq27', 'PFIT_1143800.1-p1:transcript=PFIT_1143800.1:gene=PFIT_11438…
IDKEEEN|IEKEEEN	{'PF3D7_0314800.1-p1:transcript=PF3D7_0314800.1:gene=PF3D7_0314800:organism=Plasmodium_falciparum_3D7:gene_product=conserved_Plasmodium_protein__unknown_function:transcript_product=conserved_Plasmodium_protein__unknown_function:location=Pf3D7_03_v3:604595-607931(+):protein_length=1040:sequence_SO=chromosome:SO=protein_coding_seq24', 'PF3D7_0405300.1-p1:transcript=PF3D7_0405300.1:gene=PF3D7_040530…
KNDKNEK	{'PF3D7_1434500.1-p1:transcript=PF3D7_1434500.1:gene=PF3D7_1434500:organism=Plasmodium_falciparum_3D7:gene_product=dynein-related_AAA-type_ATPase__putative:transcript_product=dynein-related_AAA-type_ATPase__putative:location=Pf3D7_14_v3:1378348-1402665(-):protein_length=8105:sequence_SO=chromosome:SO=protein_coding_seq290', 'PFIT_0719200.1-p1:transcript=PFIT_0719200.1:gene=PFIT_0719200:organism=P…
RKERERL	{'PF3D7_1335400.1-p1:transcript=PF3D7_1335400.1:gene=PF3D7_1335400:organism=Plasmodium_falciparum_3D7:gene_product=reticulocyte_binding_protein_2_homologue_a:transcript_product=reticulocyte_binding_protein_2_homologue_a:location=Pf3D7_13_v3:1440779-1450385(+):protein_length=3130:sequence_SO=chromosome:SO=protein_coding_seq106', 'PF3D7_1335300.1-p1:transcript=PF3D7_1335300.1:gene=PF3D7_1335300:org…
SDQNTEN|SDQQTEN	{'PF3D7_1444100.1-p1:transcript=PF3D7_1444100.1:gene=PF3D7_1444100:organism=Plasmodium_falciparum_3D7:gene_product=conserved_Plasmodium_protein__unknown_function:transcript_product=conserved_Plasmodium_protein__unknown_function:location=Pf3D7_14_v3:1801961-1825326(-):protein_length=7231:sequence_SO=chromosome:SO=protein_coding_seq140', 'PF3D7_1252100.1-p1:transcript=PF3D7_1252100.1:gene=PF3D7_125…
NEYMNDN	{'PF3D7_0525200.1-p1:transcript=PF3D7_0525200.1:gene=PF3D7_0525200:organism=Plasmodium_falciparum_3D7:gene_product=structural_maintenance_of_chromosomes_protein_6__putative:transcript_product=structural_maintenance_of_chromosomes_protein_6__putative:location=Pf3D7_05_v3:1045462-1051253(+):protein_length=1849:sequence_SO=chromosome:SO=protein_coding_seq3', 'PFIT_1014000.1-p1:transcript=PFIT_101400…
EDVKEDI	{'PF3D7_0715200.1-p1:transcript=PF3D7_0715200.1:gene=PF3D7_0715200:organism=Plasmodium_falciparum_3D7:gene_product=conserved_Plasmodium_protein__unknown_function:transcript_product=conserved_Plasmodium_protein__unknown_function:location=Pf3D7_07_v3:676061-682681(-):protein_length=2206:sequence_SO=chromosome:SO=protein_coding_seq20', 'PFIT_0713300.1-p1:transcript=PFIT_0713300.1:gene=PFIT_0713300:o…
KNNVVVN	{'PF3D7_0919900.1-p1:transcript=PF3D7_0919900.1:gene=PF3D7_0919900:organism=Plasmodium_falciparum_3D7:gene_product=regulator_of_chromosome_condensation__putative:transcript_product=regulator_of_chromosome_condensation__putative:location=Pf3D7_09_v3:809659-819804(-):protein_length=3381:sequence_SO=chromosome:SO=protein_coding_seq24', 'PFIT_0920000.1-p1:transcript=PFIT_0920000.1:gene=PFIT_0920000:o…
IILKDKL	{'PFIT_bin07100.1-p1:transcript=PFIT_bin07100.1:gene=PFIT_bin07100:organism=Plasmodium_falciparum_IT:gene_product=rifin:transcript_product=rifin:location=PfIT_bin_v3_archived_contig_18:2-988(+):protein_length=328:sequence_SO=random_sequence:SO=protein_coding_seq2', 'PF3D7_0732900.1-p1:transcript=PF3D7_0732900.1:gene=PF3D7_0732900:organism=Plasmodium_falciparum_3D7:gene_product=rifin:transcript_pr…
REKQEQL	{'PF3D7_1335400.1-p1:transcript=PF3D7_1335400.1:gene=PF3D7_1335400:organism=Plasmodium_falciparum_3D7:gene_product=reticulocyte_binding_protein_2_homologue_a:transcript_product=reticulocyte_binding_protein_2_homologue_a:location=Pf3D7_13_v3:1440779-1450385(+):protein_length=3130:sequence_SO=chromosome:SO=protein_coding_seq110', 'PF3D7_1335300.1-p1:transcript=PF3D7_1335300.1:gene=PF3D7_1335300:org…
NENYYSD	{'PF3D7_0723400.1-p1:transcript=PF3D7_0723400.1:gene=PF3D7_0723400:organism=Plasmodium_falciparum_3D7:gene_product=conserved_Plasmodium_protein__unknown_function:transcript_product=conserved_Plasmodium_protein__unknown_function:location=Pf3D7_07_v3:978920-983188(-):protein_length=1422:sequence_SO=chromosome:SO=protein_coding_seq9', 'PF3D7_1452000.1-p1:transcript=PF3D7_1452000.1:gene=PF3D7_1452000…
NKEKDDN	{'PFIT_1228500.1-p1:transcript=PFIT_1228500.1:gene=PFIT_1228500:organism=Plasmodium_falciparum_IT:gene_product=conserved_Plasmodium_protein__unknown_function:transcript_product=conserved_Plasmodium_protein__unknown_function:location=PfIT_12_v3:1121130-1130633(-):protein_length=3167:sequence_SO=chromosome:SO=protein_coding_seq78', 'PFIT_1228500.1-p1:transcript=PFIT_1228500.1:gene=PFIT_1228500:orga…
FEEEKKK	{'PF3D7_0406500.1-p1:transcript=PF3D7_0406500.1:gene=PF3D7_0406500:organism=Plasmodium_falciparum_3D7:gene_product=NYN_domain-containing_protein__putative:transcript_product=NYN_domain-containing_protein__putative:location=Pf3D7_04_v3:334282-344054(-):protein_length=3211:sequence_SO=chromosome:SO=protein_coding_seq46', 'PFIT_1236900.1-p1:transcript=PFIT_1236900.1:gene=PFIT_1236900:organism=Plasmo…
NKQNKDY|NKQNKEY	{'PF3D7_0704100.1-p1:transcript=PF3D7_0704100.1:gene=PF3D7_0704100:organism=Plasmodium_falciparum_3D7:gene_product=conserved_Plasmodium_membrane_protein__unknown_function:transcript_product=conserved_Plasmodium_membrane_protein__unknown_function:location=Pf3D7_07_v3:180036-190715(+):protein_length=3559:sequence_SO=chromosome:SO=protein_coding_seq70', 'PF3D7_0704100.1-p1:transcript=PF3D7_0704100.1…
EEEERKE	{'RAJ116var24_seq40', 'PF3D7_1335400.1-p1:transcript=PF3D7_1335400.1:gene=PF3D7_1335400:organism=Plasmodium_falciparum_3D7:gene_product=reticulocyte_binding_protein_2_homologue_a:transcript_product=reticulocyte_binding_protein_2_homologue_a:location=Pf3D7_13_v3:1440779-1450385(+):protein_length=3130:sequence_SO=chromosome:SO=protein_coding_seq106', 'PF3D7_1335300.1-p1:transcript=PF3D7_1335300.1:g…
NIKNTNE	{'PFIT_1228500.1-p1:transcript=PFIT_1228500.1:gene=PFIT_1228500:organism=Plasmodium_falciparum_IT:gene_product=conserved_Plasmodium_protein__unknown_function:transcript_product=conserved_Plasmodium_protein__unknown_function:location=PfIT_12_v3:1121130-1130633(-):protein_length=3167:sequence_SO=chromosome:SO=protein_coding_seq78', 'PFIT_1228500.1-p1:transcript=PFIT_1228500.1:gene=PFIT_1228500:orga…
KNYKNDK	{'PF3D7_1441300.1-p1:transcript=PF3D7_1441300.1:gene=PF3D7_1441300:organism=Plasmodium_falciparum_3D7:gene_product=serine/threonine_protein_kinase__putative:transcript_product=serine/threonine_protein_kinase__putative:location=Pf3D7_14_v3:1681791-1689157(+):protein_length=2247:sequence_SO=chromosome:SO=protein_coding_seq80', 'PF3D7_1037400.1-p1:transcript=PF3D7_1037400.1:gene=PF3D7_1037400:organi…
EDNIKNK	{'PF3D7_1003400.1-p1:transcript=PF3D7_1003400.1:gene=PF3D7_1003400:organism=Plasmodium_falciparum_3D7:gene_product=conserved_Plasmodium_protein__unknown_function:transcript_product=conserved_Plasmodium_protein__unknown_function:location=Pf3D7_10_v3:152364-158516(-):protein_length=2050:sequence_SO=chromosome:SO=protein_coding_seq39', 'PF3D7_0405300.1-p1:transcript=PF3D7_0405300.1:gene=PF3D7_040530…
ETSSNEK	{'PF3D7_1002100.1-p1:transcript=PF3D7_1002100.1:gene=PF3D7_1002100:organism=Plasmodium_falciparum_3D7:gene_product=EMP1-trafficking_protein:transcript_product=EMP1-trafficking_protein:location=Pf3D7_10_v3:106653-108662(-):protein_length=631:sequence_SO=chromosome:SO=protein_coding_seq21', 'PF3D7_1002100.1-p1:transcript=PF3D7_1002100.1:gene=PF3D7_1002100:organism=Plasmodium_falciparum_3D7:gene_pro…
SNTSSGA	{'Plasmodiumfalciparum_AMA1_[K1_allele]_full-length_seq4', 'PF3D7_0930300.1-p1:transcript=PF3D7_0930300.1:gene=PF3D7_0930300:organism=Plasmodium_falciparum_3D7:gene_product=merozoite_surface_protein_1:transcript_product=merozoite_surface_protein_1:location=Pf3D7_09_v3:1201812-1206974(+):protein_length=1720:sequence_SO=chromosome:SO=protein_coding_seq5', 'PF3D7_0930300.1-p1:transcript=PF3D7_093030…
KKKNNNN	{'PF3D7_1324300.1-p1:transcript=PF3D7_1324300.1:gene=PF3D7_1324300:organism=Plasmodium_falciparum_3D7:gene_product=conserved_Plasmodium_membrane_protein__unknown_function:transcript_product=conserved_Plasmodium_membrane_protein__unknown_function:location=Pf3D7_13_v3:1002748-1019303(-):protein_length=5415:sequence_SO=chromosome:SO=protein_coding_seq74', 'PFIT_1307800.1-p1:transcript=PFIT_1307800.1…
DNKMNGD|DNKMNGE	{'PFIT_1342100.1-p1:transcript=PFIT_1342100.1:gene=PFIT_1342100:organism=Plasmodium_falciparum_IT:gene_product=transcription_factor_with_AP2_domain(s):transcript_product=transcription_factor_with_AP2_domain(s):location=PfIT_13_v3:1634784-1646174(-):protein_length=3796:sequence_SO=chromosome:SO=protein_coding_seq29', 'PF3D7_0709300.1-p1:transcript=PF3D7_0709300.1:gene=PF3D7_0709300:organism=Plasmo…
VAEELVE	{'PF3D7_1035900.1-p1:transcript=PF3D7_1035900.1:gene=PF3D7_1035900:organism=Plasmodium_falciparum_3D7:gene_product=probable_protein__unknown_function:transcript_product=probable_protein__unknown_function:location=Pf3D7_10_v3:1423983-1425683(+):protein_length=566:sequence_SO=chromosome:SO=protein_coding_seq11', 'PF3D7_1035900.1-p1:transcript=PF3D7_1035900.1:gene=PF3D7_1035900:organism=Plasmodium_f…
IEHSNRN|LEHSNRN	{'PF3D7_1349500.1-p1:transcript=PF3D7_1349500.1:gene=PF3D7_1349500:organism=Plasmodium_falciparum_3D7:gene_product=conserved_Plasmodium_protein__unknown_function:transcript_product=conserved_Plasmodium_protein__unknown_function:location=Pf3D7_13_v3:1985337-1995614(-):protein_length=3381:sequence_SO=chromosome:SO=protein_coding_seq93', 'PF3D7_1150400.1-p1:transcript=PF3D7_1150400.1:gene=PF3D7_1150…
NTSSGAS	{'Plasmodiumfalciparum_AMA1_[K1_allele]_full-length_seq4', 'PF3D7_0930300.1-p1:transcript=PF3D7_0930300.1:gene=PF3D7_0930300:organism=Plasmodium_falciparum_3D7:gene_product=merozoite_surface_protein_1:transcript_product=merozoite_surface_protein_1:location=Pf3D7_09_v3:1201812-1206974(+):protein_length=1720:sequence_SO=chromosome:SO=protein_coding_seq5', 'PF3D7_0930300.1-p1:transcript=PF3D7_093030…
YTDEDLL	{'PF3D7_1149200.1-p1:transcript=PF3D7_1149200.1:gene=PF3D7_1149200:organism=Plasmodium_falciparum_3D7:gene_product=ring-infected_erythrocyte_surface_antigen:transcript_product=ring-infected_erythrocyte_surface_antigen:location=Pf3D7_11_v3:1976407-1979804(+):protein_length=1090:sequence_SO=chromosome:SO=protein_coding_seq17', 'PF3D7_0102200.1-p1:transcript=PF3D7_0102200.1:gene=PF3D7_0102200:organi…
KEIEKQE|KELEKQE	{'PF3D7_1301400.1-p1:transcript=PF3D7_1301400.1:gene=PF3D7_1301400:organism=Plasmodium_falciparum_3D7:gene_product=Plasmodium_exported_protein_(hyp12)__unknown_function:transcript_product=Plasmodium_exported_protein_(hyp12)__unknown_function:location=Pf3D7_13_v3:82718-84018(+):protein_length=381:sequence_SO=chromosome:SO=protein_coding_seq12', 'PF3D7_1301400.1-p1:transcript=PF3D7_1301400.1:gene=P…
ADPEGQI	{'PF3D7_1016300.1-p1:transcript=PF3D7_1016300.1:gene=PF3D7_1016300:organism=Plasmodium_falciparum_3D7:gene_product=glycophorin_binding_protein:transcript_product=glycophorin_binding_protein:location=Pf3D7_10_v3:650898-653567(-):protein_length=824:sequence_SO=chromosome:SO=protein_coding_seq31', 'PF3D7_1016300.1-p1:transcript=PF3D7_1016300.1:gene=PF3D7_1016300:organism=Plasmodium_falciparum_3D7:ge…
MNKDENN|MNKEENN	{'PF3D7_1201400.1-p1:transcript=PF3D7_1201400.1:gene=PF3D7_1201400:organism=Plasmodium_falciparum_3D7:gene_product=Plasmodium_exported_protein__unknown_function:transcript_product=Plasmodium_exported_protein__unknown_function:location=Pf3D7_12_v3:93581-97146(-):protein_length=1129:sequence_SO=chromosome:SO=protein_coding_seq39', 'PF3D7_1201400.1-p1:transcript=PF3D7_1201400.1:gene=PF3D7_1201400:or…
NNIENIN	{'PF3D7_0619300.1-p1:transcript=PF3D7_0619300.1:gene=PF3D7_0619300:organism=Plasmodium_falciparum_3D7:gene_product=conserved_Plasmodium_protein__unknown_function:transcript_product=conserved_Plasmodium_protein__unknown_function:location=Pf3D7_06_v3:803374-814552(-):protein_length=3618:sequence_SO=chromosome:SO=protein_coding_seq70', 'PF3D7_1120600.1-p1:transcript=PF3D7_1120600.1:gene=PF3D7_112060…
IKEDIND|VKEDIND	{'PF3D7_0417600.1-p1:transcript=PF3D7_0417600.1:gene=PF3D7_0417600:organism=Plasmodium_falciparum_3D7:gene_product=conserved_Plasmodium_protein__unknown_function:transcript_product=conserved_Plasmodium_protein__unknown_function:location=Pf3D7_04_v3:780250-783246(-):protein_length=807:sequence_SO=chromosome:SO=protein_coding_seq23', 'PFIT_0530800.1-p1:transcript=PFIT_0530800.1:gene=PFIT_0530800:or…
EDIIKEN	{'PFIT_0713300.1-p1:transcript=PFIT_0713300.1:gene=PFIT_0713300:organism=Plasmodium_falciparum_IT:gene_product=conserved_Plasmodium_protein__unknown_function:transcript_product=conserved_Plasmodium_protein__unknown_function:location=PfIT_07_v3:662284-668904(-):protein_length=2206:sequence_SO=chromosome:SO=protein_coding_seq20', 'PF3D7_0715200.1-p1:transcript=PF3D7_0715200.1:gene=PF3D7_0715200:org…
KERERIE	{'PF3D7_1335300.1-p1:transcript=PF3D7_1335300.1:gene=PF3D7_1335300:organism=Plasmodium_falciparum_3D7:gene_product=reticulocyte_binding_protein_2_homologue_b:transcript_product=reticulocyte_binding_protein_2_homologue_b:location=Pf3D7_13_v3:1428874-1438852(-):protein_length=3254:sequence_SO=chromosome:SO=protein_coding_seq108', 'PF3D7_1335400.1-p1:transcript=PF3D7_1335400.1:gene=PF3D7_1335400:org…
NKLKEDN|NKLKEDQ	{'PF3D7_1002000.1-p1:transcript=PF3D7_1002000.1:gene=PF3D7_1002000:organism=Plasmodium_falciparum_3D7:gene_product=Plasmodium_exported_protein_(hyp2)__unknown_function:transcript_product=Plasmodium_exported_protein_(hyp2)__unknown_function:location=Pf3D7_10_v3:103118-104683(-):protein_length=469:sequence_SO=chromosome:SO=protein_coding_seq13', 'PF3D7_1002000.1-p1:transcript=PF3D7_1002000.1:gene=P…
NKKLGNN	{'PFIT_0206900.1-p1:transcript=PFIT_0206900.1:gene=PFIT_0206900:organism=Plasmodium_falciparum_IT:gene_product=serine_repeat_antigen_5:transcript_product=serine_repeat_antigen_5:location=PfIT_02_v3:249818-253224(-):protein_length=984:sequence_SO=chromosome:SO=protein_coding_seq34', 'PF3D7_0707300.1-p1:transcript=PF3D7_0707300.1:gene=PF3D7_0707300:organism=Plasmodium_falciparum_3D7:gene_product=rh…
EKLNHSE	{'PF3D7_0220100.1-p1:transcript=PF3D7_0220100.1:gene=PF3D7_0220100:organism=Plasmodium_falciparum_3D7:gene_product=DnaJ_protein__putative:transcript_product=DnaJ_protein__putative:location=Pf3D7_02_v3:804520-807741(+):protein_length=997:sequence_SO=chromosome:SO=protein_coding_seq20', 'PF3D7_0220100.1-p1:transcript=PF3D7_0220100.1:gene=PF3D7_0220100:organism=Plasmodium_falciparum_3D7:gene_product…
NNEINKK	{'PF3D7_0619300.1-p1:transcript=PF3D7_0619300.1:gene=PF3D7_0619300:organism=Plasmodium_falciparum_3D7:gene_product=conserved_Plasmodium_protein__unknown_function:transcript_product=conserved_Plasmodium_protein__unknown_function:location=Pf3D7_06_v3:803374-814552(-):protein_length=3618:sequence_SO=chromosome:SO=protein_coding_seq46', 'PF3D7_1201400.1-p1:transcript=PF3D7_1201400.1:gene=PF3D7_120140…
PEEIIEE	{'PF3D7_1038400.1-p1:transcript=PF3D7_1038400.1:gene=PF3D7_1038400:organism=Plasmodium_falciparum_3D7:gene_product=gametocyte-specific_protein:transcript_product=gametocyte-specific_protein:location=Pf3D7_10_v3:1519021-1547825(+):protein_length=9563:sequence_SO=chromosome:SO=protein_coding_seq87', 'PF3D7_1038400.1-p1:transcript=PF3D7_1038400.1:gene=PF3D7_1038400:organism=Plasmodium_falciparum_3D7…
KERLERE	{'PF3D7_1335300.1-p1:transcript=PF3D7_1335300.1:gene=PF3D7_1335300:organism=Plasmodium_falciparum_3D7:gene_product=reticulocyte_binding_protein_2_homologue_b:transcript_product=reticulocyte_binding_protein_2_homologue_b:location=Pf3D7_13_v3:1428874-1438852(-):protein_length=3254:sequence_SO=chromosome:SO=protein_coding_seq108', 'PF3D7_1335400.1-p1:transcript=PF3D7_1335400.1:gene=PF3D7_1335400:org…
NDDNNKD	{'PF3D7_1141700.1-p1:transcript=PF3D7_1141700.1:gene=PF3D7_1141700:organism=Plasmodium_falciparum_3D7:gene_product=OTU_domain-containing_protein__putative:transcript_product=OTU_domain-containing_protein__putative:location=Pf3D7_11_v3:1669951-1671512(+):protein_length=313:sequence_SO=chromosome:SO=protein_coding_seq2', 'PF3D7_1405700.1-p1:transcript=PF3D7_1405700.1:gene=PF3D7_1405700:organism=Pla…
AQSGTSG	{'PF3D7_0930300.1-p1:transcript=PF3D7_0930300.1:gene=PF3D7_0930300:organism=Plasmodium_falciparum_3D7:gene_product=merozoite_surface_protein_1:transcript_product=merozoite_surface_protein_1:location=Pf3D7_09_v3:1201812-1206974(+):protein_length=1720:sequence_SO=chromosome:SO=protein_coding_seq3', 'Plasmodiumfalciparum_AMA1_[K1_allele]_full-length_seq2', 'PF3D7_0930300.1-p1:transcript=PF3D7_093030…
KKDDAKT|KKDDGKT	{'PF3D7_0207000.1-p1:transcript=PF3D7_0207000.1:gene=PF3D7_0207000:organism=Plasmodium_falciparum_3D7:gene_product=merozoite_surface_protein_4:transcript_product=merozoite_surface_protein_4:location=Pf3D7_02_v3:277494-278456(-):protein_length=272:sequence_SO=chromosome:SO=protein_coding_seq4', 'PF3D7_0207000.1-p1:transcript=PF3D7_0207000.1:gene=PF3D7_0207000:organism=Plasmodium_falciparum_3D7:gen…
IDGENKK|VDGENKK	{'PF3D7_0108700.1-p1:transcript=PF3D7_0108700.1:gene=PF3D7_0108700:organism=Plasmodium_falciparum_3D7:gene_product=secreted_ookinete_protein__putative:transcript_product=secreted_ookinete_protein__putative:location=Pf3D7_01_v3:352314-356211(-):protein_length=1152:sequence_SO=chromosome:SO=protein_coding_seq5', 'PF3D7_1452000.1-p1:transcript=PF3D7_1452000.1:gene=PF3D7_1452000:organism=Plasmodium_f…
ELLSHNN	{'PF3D7_1335400.1-p1:transcript=PF3D7_1335400.1:gene=PF3D7_1335400:organism=Plasmodium_falciparum_3D7:gene_product=reticulocyte_binding_protein_2_homologue_a:transcript_product=reticulocyte_binding_protein_2_homologue_a:location=Pf3D7_13_v3:1440779-1450385(+):protein_length=3130:sequence_SO=chromosome:SO=protein_coding_seq106', 'PF3D7_1335300.1-p1:transcript=PF3D7_1335300.1:gene=PF3D7_1335300:org…
KKNMDNT|RKNMDNT	{'PF3D7_1120600.1-p1:transcript=PF3D7_1120600.1:gene=PF3D7_1120600:organism=Plasmodium_falciparum_3D7:gene_product=conserved_Plasmodium_protein__unknown_function:transcript_product=conserved_Plasmodium_protein__unknown_function:location=Pf3D7_11_v3:775233-783639(-):protein_length=2545:sequence_SO=chromosome:SO=protein_coding_seq82', 'PF3D7_0803100.1-p1:transcript=PF3D7_0803100.1:gene=PF3D7_080310…
IEKEKQE	{'PF3D7_1335300.1-p1:transcript=PF3D7_1335300.1:gene=PF3D7_1335300:organism=Plasmodium_falciparum_3D7:gene_product=reticulocyte_binding_protein_2_homologue_b:transcript_product=reticulocyte_binding_protein_2_homologue_b:location=Pf3D7_13_v3:1428874-1438852(-):protein_length=3254:sequence_SO=chromosome:SO=protein_coding_seq108', 'PFIT_1036200.1-p1:transcript=PFIT_1036200.1:gene=PFIT_1036200:organi…
VNHSEKL	{'PF3D7_0220100.1-p1:transcript=PF3D7_0220100.1:gene=PF3D7_0220100:organism=Plasmodium_falciparum_3D7:gene_product=DnaJ_protein__putative:transcript_product=DnaJ_protein__putative:location=Pf3D7_02_v3:804520-807741(+):protein_length=997:sequence_SO=chromosome:SO=protein_coding_seq20', 'PF3D7_0220100.1-p1:transcript=PF3D7_0220100.1:gene=PF3D7_0220100:organism=Plasmodium_falciparum_3D7:gene_product…
EKNDKNE	{'PF3D7_1434500.1-p1:transcript=PF3D7_1434500.1:gene=PF3D7_1434500:organism=Plasmodium_falciparum_3D7:gene_product=dynein-related_AAA-type_ATPase__putative:transcript_product=dynein-related_AAA-type_ATPase__putative:location=Pf3D7_14_v3:1378348-1402665(-):protein_length=8105:sequence_SO=chromosome:SO=protein_coding_seq290', 'PF3D7_1229600.1-p1:transcript=PF3D7_1229600.1:gene=PF3D7_1229600:organis…
KVLEEVI	{'PF3D7_1038400.1-p1:transcript=PF3D7_1038400.1:gene=PF3D7_1038400:organism=Plasmodium_falciparum_3D7:gene_product=gametocyte-specific_protein:transcript_product=gametocyte-specific_protein:location=Pf3D7_10_v3:1519021-1547825(+):protein_length=9563:sequence_SO=chromosome:SO=protein_coding_seq362', 'PF3D7_1035900.1-p1:transcript=PF3D7_1035900.1:gene=PF3D7_1035900:organism=Plasmodium_falciparum_3D…
VNVLYQI	{'PF3D7_1401000.1-p1:transcript=PF3D7_1401000.1:gene=PF3D7_1401000:organism=Plasmodium_falciparum_3D7:gene_product=glycophorin_binding_protein:transcript_product=glycophorin_binding_protein:location=Pf3D7_14_v3:34693-35773(-):protein_length=307:sequence_SO=chromosome:SO=protein_coding_seq11', 'PF3D7_1401000.1-p1:transcript=PF3D7_1401000.1:gene=PF3D7_1401000:organism=Plasmodium_falciparum_3D7:gene…
NKNDKKN	{'PF3D7_0501400.1-p1:transcript=PF3D7_0501400.1:gene=PF3D7_0501400:organism=Plasmodium_falciparum_3D7:gene_product=interspersed_repeat_antigen:transcript_product=interspersed_repeat_antigen:location=Pf3D7_05_v3:74509-79842(+):protein_length=1720:sequence_SO=chromosome:SO=protein_coding_seq17', 'PF3D7_0501400.1-p1:transcript=PF3D7_0501400.1:gene=PF3D7_0501400:organism=Plasmodium_falciparum_3D7:gen…
EKVNHSE	{'PF3D7_0220100.1-p1:transcript=PF3D7_0220100.1:gene=PF3D7_0220100:organism=Plasmodium_falciparum_3D7:gene_product=DnaJ_protein__putative:transcript_product=DnaJ_protein__putative:location=Pf3D7_02_v3:804520-807741(+):protein_length=997:sequence_SO=chromosome:SO=protein_coding_seq20', 'PF3D7_0220100.1-p1:transcript=PF3D7_0220100.1:gene=PF3D7_0220100:organism=Plasmodium_falciparum_3D7:gene_product…
LGDEKLI	{'PF3D7_1335400.1-p1:transcript=PF3D7_1335400.1:gene=PF3D7_1335400:organism=Plasmodium_falciparum_3D7:gene_product=reticulocyte_binding_protein_2_homologue_a:transcript_product=reticulocyte_binding_protein_2_homologue_a:location=Pf3D7_13_v3:1440779-1450385(+):protein_length=3130:sequence_SO=chromosome:SO=protein_coding_seq106', 'PF3D7_1335300.1-p1:transcript=PF3D7_1335300.1:gene=PF3D7_1335300:org…
NDHNNKK|NDKNNKK	{'PF3D7_1348800.1-p1:transcript=PF3D7_1348800.1:gene=PF3D7_1348800:organism=Plasmodium_falciparum_3D7:gene_product=E1-E2_ATPase__putative:transcript_product=E1-E2_ATPase__putative:location=Pf3D7_13_v3:1959657-1965677(+):protein_length=1834:sequence_SO=chromosome:SO=protein_coding_seq13', 'PF3D7_1222600.1-p1:transcript=PF3D7_1222600.1:gene=PF3D7_1222600:organism=Plasmodium_falciparum_3D7:gene_prod…
KDKKDKK	{'RAJ116var38_seq42', 'PF3D7_0501400.1-p1:transcript=PF3D7_0501400.1:gene=PF3D7_0501400:organism=Plasmodium_falciparum_3D7:gene_product=interspersed_repeat_antigen:transcript_product=interspersed_repeat_antigen:location=Pf3D7_05_v3:74509-79842(+):protein_length=1720:sequence_SO=chromosome:SO=protein_coding_seq53', 'PFIT_bin07000.1-p1:transcript=PFIT_bin07000.1:gene=PFIT_bin07000:organism=Plasmodi…
IKNTNEK	{'PFIT_1228500.1-p1:transcript=PFIT_1228500.1:gene=PFIT_1228500:organism=Plasmodium_falciparum_IT:gene_product=conserved_Plasmodium_protein__unknown_function:transcript_product=conserved_Plasmodium_protein__unknown_function:location=PfIT_12_v3:1121130-1130633(-):protein_length=3167:sequence_SO=chromosome:SO=protein_coding_seq78', 'PFIT_1228500.1-p1:transcript=PFIT_1228500.1:gene=PFIT_1228500:orga…
EEAEEIK|EEAEELK	{'DD2var01a_seq31', 'PFIT_0411500.1-p1:transcript=PFIT_0411500.1:gene=PFIT_0411500:organism=Plasmodium_falciparum_IT:gene_product=BC_ITvar27_-_erythrocyte_membrane_protein_1__putative:transcript_product=BC_ITvar27_-_erythrocyte_membrane_protein_1__putative:location=PfIT_04_v3:615265-626117(-):protein_length=3168:sequence_SO=chromosome:SO=protein_coding_seq31', 'IT4var59_seq32', 'DD2var01a_seq30',…
RQEQQQK	{'PF3D7_1335400.1-p1:transcript=PF3D7_1335400.1:gene=PF3D7_1335400:organism=Plasmodium_falciparum_3D7:gene_product=reticulocyte_binding_protein_2_homologue_a:transcript_product=reticulocyte_binding_protein_2_homologue_a:location=Pf3D7_13_v3:1440779-1450385(+):protein_length=3130:sequence_SO=chromosome:SO=protein_coding_seq110', 'PF3D7_1335300.1-p1:transcript=PF3D7_1335300.1:gene=PF3D7_1335300:org…
TEEVVEE	{'PF3D7_1038400.1-p1:transcript=PF3D7_1038400.1:gene=PF3D7_1038400:organism=Plasmodium_falciparum_3D7:gene_product=gametocyte-specific_protein:transcript_product=gametocyte-specific_protein:location=Pf3D7_10_v3:1519021-1547825(+):protein_length=9563:sequence_SO=chromosome:SO=protein_coding_seq183', 'PF3D7_1149000.1-p1:transcript=PF3D7_1149000.1:gene=PF3D7_1149000:organism=Plasmodium_falciparum_3D…
KDNIFNK|KDNIYNK	{'PF3D7_0724600.1-p1:transcript=PF3D7_0724600.1:gene=PF3D7_0724600:organism=Plasmodium_falciparum_3D7:gene_product=protein_kinase__putative:transcript_product=protein_kinase__putative:location=Pf3D7_07_v3:1026444-1033077(-):protein_length=2041:sequence_SO=chromosome:SO=protein_coding_seq66', 'PF3D7_0724600.1-p1:transcript=PF3D7_0724600.1:gene=PF3D7_0724600:organism=Plasmodium_falciparum_3D7:gene_…
QKEEELK|QKEEELR	{'PF3D7_1335400.1-p1:transcript=PF3D7_1335400.1:gene=PF3D7_1335400:organism=Plasmodium_falciparum_3D7:gene_product=reticulocyte_binding_protein_2_homologue_a:transcript_product=reticulocyte_binding_protein_2_homologue_a:location=Pf3D7_13_v3:1440779-1450385(+):protein_length=3130:sequence_SO=chromosome:SO=protein_coding_seq110', 'PF3D7_1335400.1-p1:transcript=PF3D7_1335400.1:gene=PF3D7_1335400:org…
VQQNVQQ	{'PFIT_0518700.1-p1:transcript=PFIT_0518700.1:gene=PFIT_0518700:organism=Plasmodium_falciparum_IT:gene_product=WD_repeat-containing_protein_26__putative:transcript_product=WD_repeat-containing_protein_26__putative:location=PfIT_05_v3:775569-779423(+):protein_length=1284:sequence_SO=chromosome:SO=protein_coding_seq27', 'PF3D7_1474000.1-p1:transcript=PF3D7_1474000.1:gene=PF3D7_1474000:organism=Plas…
DGIKNID|DGIKNVD	{'PF3D7_1203300.1-p1:transcript=PF3D7_1203300.1:gene=PF3D7_1203300:organism=Plasmodium_falciparum_3D7:gene_product=conserved_Plasmodium_protein__unknown_function:transcript_product=conserved_Plasmodium_protein__unknown_function:location=Pf3D7_12_v3:173875-176853(-):protein_length=992:sequence_SO=chromosome:SO=protein_coding_seq9', 'PF3D7_1203300.1-p1:transcript=PF3D7_1203300.1:gene=PF3D7_1203300:…
EEVKEEE	{'PF3D7_0114000.1-p1:transcript=PF3D7_0114000.1:gene=PF3D7_0114000:organism=Plasmodium_falciparum_3D7:gene_product=exported_protein_family_1:transcript_product=exported_protein_family_1:location=Pf3D7_01_v3:542480-546983(+):protein_length=1463:sequence_SO=chromosome:SO=protein_coding_seq24', 'PF3D7_1149000.1-p1:transcript=PF3D7_1149000.1:gene=PF3D7_1149000:organism=Plasmodium_falciparum_3D7:gene_…
NKNNKNK|NKNNKQK	{'PF3D7_1456500.1-p1:transcript=PF3D7_1456500.1:gene=PF3D7_1456500:organism=Plasmodium_falciparum_3D7:gene_product=conserved_Plasmodium_protein__unknown_function:transcript_product=conserved_Plasmodium_protein__unknown_function:location=Pf3D7_14_v3:2314380-2321555(+):protein_length=2391:sequence_SO=chromosome:SO=protein_coding_seq57', 'PF3D7_1119000.1-p1:transcript=PF3D7_1119000.1:gene=PF3D7_1119…
DNIFNKD|DNIYNKD	{'PFIT_1423400.1-p1:transcript=PFIT_1423400.1:gene=PFIT_1423400:organism=Plasmodium_falciparum_IT:gene_product=conserved_Plasmodium_protein__unknown_function:transcript_product=conserved_Plasmodium_protein__unknown_function:location=PfIT_14_v3:928046-932965(+):protein_length=1639:sequence_SO=chromosome:SO=protein_coding_seq11', 'PF3D7_0525200.1-p1:transcript=PF3D7_0525200.1:gene=PF3D7_0525200:org…
EEENEEK	{'PFIT_1123800.1-p1:transcript=PFIT_1123800.1:gene=PFIT_1123800:organism=Plasmodium_falciparum_IT:gene_product=dynein_heavy_chain__putative:transcript_product=dynein_heavy_chain__putative:location=PfIT_11_v3:811411-827721(+):protein_length=5253:sequence_SO=chromosome:SO=protein_coding_seq192', 'PF3D7_0617100.1-p1:transcript=PF3D7_0617100.1:gene=PF3D7_0617100:organism=Plasmodium_falciparum_3D7:gen…
TDNNNTK	{'PF3D7_0702300.1-p1:transcript=PF3D7_0702300.1:gene=PF3D7_0702300:organism=Plasmodium_falciparum_3D7:gene_product=sporozoite_threonine_and_asparagine-rich_protein:transcript_product=sporozoite_threonine_and_asparagine-rich_protein:location=Pf3D7_07_v3:96761-98730(+):protein_length=594:sequence_SO=chromosome:SO=protein_coding_seq16', 'PF3D7_0702300.1-p1:transcript=PF3D7_0702300.1:gene=PF3D7_07023…
KNEKNMK	{'PF3D7_1143100.1-p1:transcript=PF3D7_1143100.1:gene=PF3D7_1143100:organism=Plasmodium_falciparum_3D7:gene_product=AP2_domain_transcription_factor_AP2-O__putative:transcript_product=AP2_domain_transcription_factor_AP2-O__putative:location=Pf3D7_11_v3:1720047-1724861(-):protein_length=1604:sequence_SO=chromosome:SO=protein_coding_seq27', 'PFIT_1143800.1-p1:transcript=PFIT_1143800.1:gene=PFIT_11438…
NKNKNTK	{'PF3D7_0310200.1-p1:transcript=PF3D7_0310200.1:gene=PF3D7_0310200:organism=Plasmodium_falciparum_3D7:gene_product=phd_finger_protein__putative:transcript_product=phd_finger_protein__putative:location=Pf3D7_03_v3:427290-440942(+):protein_length=4550:sequence_SO=chromosome:SO=protein_coding_seq52', 'PF3D7_0407300.1-p1:transcript=PF3D7_0407300.1:gene=PF3D7_0407300:organism=Plasmodium_falciparum_3D7…
KLNHSEK	{'PF3D7_0220100.1-p1:transcript=PF3D7_0220100.1:gene=PF3D7_0220100:organism=Plasmodium_falciparum_3D7:gene_product=DnaJ_protein__putative:transcript_product=DnaJ_protein__putative:location=Pf3D7_02_v3:804520-807741(+):protein_length=997:sequence_SO=chromosome:SO=protein_coding_seq20', 'PF3D7_0220100.1-p1:transcript=PF3D7_0220100.1:gene=PF3D7_0220100:organism=Plasmodium_falciparum_3D7:gene_product…
NVEENIE	{'PF3D7_1149200.1-p1:transcript=PF3D7_1149200.1:gene=PF3D7_1149200:organism=Plasmodium_falciparum_3D7:gene_product=ring-infected_erythrocyte_surface_antigen:transcript_product=ring-infected_erythrocyte_surface_antigen:location=Pf3D7_11_v3:1976407-1979804(+):protein_length=1090:sequence_SO=chromosome:SO=protein_coding_seq42', 'PF3D7_1149200.1-p1:transcript=PF3D7_1149200.1:gene=PF3D7_1149200:organi…
DKNEKNE	{'PF3D7_0629500.1-p1:transcript=PF3D7_0629500.1:gene=PF3D7_0629500:organism=Plasmodium_falciparum_3D7:gene_product=amino_acid_transporter__putative:transcript_product=amino_acid_transporter__putative:location=Pf3D7_06_v3:1213948-1216005(-):protein_length=606:sequence_SO=chromosome:SO=protein_coding_seq2', 'PFIT_0719200.1-p1:transcript=PFIT_0719200.1:gene=PFIT_0719200:organism=Plasmodium_falciparu…
EIEKQIE|EIEKQVE	{'PF3D7_0500800.1-p1:transcript=PF3D7_0500800.1:gene=PF3D7_0500800:organism=Plasmodium_falciparum_3D7:gene_product=mature_parasite-infected_erythrocyte_surface_antigen:transcript_product=mature_parasite-infected_erythrocyte_surface_antigen:location=Pf3D7_05_v3:43327-47761(-):protein_length=1434:sequence_SO=chromosome:SO=protein_coding_seq32', 'PF3D7_1442600.1-p1:transcript=PF3D7_1442600.1:gene=PF…
KQEEERK	{'PF3D7_1335300.1-p1:transcript=PF3D7_1335300.1:gene=PF3D7_1335300:organism=Plasmodium_falciparum_3D7:gene_product=reticulocyte_binding_protein_2_homologue_b:transcript_product=reticulocyte_binding_protein_2_homologue_b:location=Pf3D7_13_v3:1428874-1438852(-):protein_length=3254:sequence_SO=chromosome:SO=protein_coding_seq108', 'PF3D7_1335400.1-p1:transcript=PF3D7_1335400.1:gene=PF3D7_1335400:org…
QERLERE	{'PF3D7_1335400.1-p1:transcript=PF3D7_1335400.1:gene=PF3D7_1335400:organism=Plasmodium_falciparum_3D7:gene_product=reticulocyte_binding_protein_2_homologue_a:transcript_product=reticulocyte_binding_protein_2_homologue_a:location=Pf3D7_13_v3:1440779-1450385(+):protein_length=3130:sequence_SO=chromosome:SO=protein_coding_seq110', 'PF3D7_1335300.1-p1:transcript=PF3D7_1335300.1:gene=PF3D7_1335300:org…
QDIKDDK|QDVKDDK	{'PF3D7_0904900.1-p1:transcript=PF3D7_0904900.1:gene=PF3D7_0904900:organism=Plasmodium_falciparum_3D7:gene_product=copper-transporting_ATPase:transcript_product=copper-transporting_ATPase:location=Pf3D7_09_v3:224875-232831(-):protein_length=2568:sequence_SO=chromosome:SO=protein_coding_seq54', 'PF3D7_0904900.1-p1:transcript=PF3D7_0904900.1:gene=PF3D7_0904900:organism=Plasmodium_falciparum_3D7:gen…
SNYINNN	{'PFIT_1475300.1-p1:transcript=PFIT_1475300.1:gene=PFIT_1475300:organism=Plasmodium_falciparum_IT:gene_product=conserved_Plasmodium_membrane_protein__unknown_function:transcript_product=conserved_Plasmodium_membrane_protein__unknown_function:location=PfIT_14_v3:3045996-3061013(-):protein_length=4777:sequence_SO=chromosome:SO=protein_coding_seq44', 'PF3D7_0709300.1-p1:transcript=PF3D7_0709300.1:ge…
INEKTNE	{'PFIT_0909100.1-p1:transcript=PFIT_0909100.1:gene=PFIT_0909100:organism=Plasmodium_falciparum_IT:gene_product=conserved_Plasmodium_protein__unknown_function:transcript_product=conserved_Plasmodium_protein__unknown_function:location=PfIT_09_v3:389109-392246(-):protein_length=993:sequence_SO=chromosome:SO=protein_coding_seq13', 'PF3D7_0604500.1-p1:transcript=PF3D7_0604500.1:gene=PF3D7_0604500:orga…
IYNNMNN	{'PF3D7_1342900.1-p1:transcript=PF3D7_1342900.1:gene=PF3D7_1342900:organism=Plasmodium_falciparum_3D7:gene_product=AP2_domain_transcription_factor__putative:transcript_product=AP2_domain_transcription_factor__putative:location=Pf3D7_13_v3:1682393-1693969(-):protein_length=3858:sequence_SO=chromosome:SO=protein_coding_seq22', 'PF3D7_1337500.1-p1:transcript=PF3D7_1337500.1:gene=PF3D7_1337500:organi…
NKQIFNK|NKQIYNK	{'PF3D7_1117900.1-p1:transcript=PF3D7_1117900.1:gene=PF3D7_1117900:organism=Plasmodium_falciparum_3D7:gene_product=conserved_Plasmodium_protein__unknown_function:transcript_product=conserved_Plasmodium_protein__unknown_function:location=Pf3D7_11_v3:678752-683281(+):protein_length=1471:sequence_SO=chromosome:SO=protein_coding_seq53', 'PF3D7_1117900.1-p1:transcript=PF3D7_1117900.1:gene=PF3D7_111790…
NNNKYNV	{'PF3D7_0803100.1-p1:transcript=PF3D7_0803100.1:gene=PF3D7_0803100:organism=Plasmodium_falciparum_3D7:gene_product=U3_small_nucleolar_RNA-associated_protein_14__putative:transcript_product=U3_small_nucleolar_RNA-associated_protein_14__putative:location=Pf3D7_08_v3:199181-202918(-):protein_length=1245:sequence_SO=chromosome:SO=protein_coding_seq32', 'PF3D7_0803100.1-p1:transcript=PF3D7_0803100.1:g…
ENEENRE	{'PF3D7_0904900.1-p1:transcript=PF3D7_0904900.1:gene=PF3D7_0904900:organism=Plasmodium_falciparum_3D7:gene_product=copper-transporting_ATPase:transcript_product=copper-transporting_ATPase:location=Pf3D7_09_v3:224875-232831(-):protein_length=2568:sequence_SO=chromosome:SO=protein_coding_seq40', 'PF3D7_1039000.1-p1:transcript=PF3D7_1039000.1:gene=PF3D7_1039000:organism=Plasmodium_falciparum_3D7:gen…
DKNDKND	{'PF3D7_1435600.1-p1:transcript=PF3D7_1435600.1:gene=PF3D7_1435600:organism=Plasmodium_falciparum_3D7:gene_product=conserved_Plasmodium_protein__unknown_function:transcript_product=conserved_Plasmodium_protein__unknown_function:location=Pf3D7_14_v3:1437511-1442877(-):protein_length=1788:sequence_SO=chromosome:SO=protein_coding_seq2', 'PFIT_0719200.1-p1:transcript=PFIT_0719200.1:gene=PFIT_0719200:…
DKKNNKD	{'PF3D7_0511500.1-p1:transcript=PF3D7_0511500.1:gene=PF3D7_0511500:organism=Plasmodium_falciparum_3D7:gene_product=RNA_pseudouridylate_synthase__putative:transcript_product=RNA_pseudouridylate_synthase__putative:location=Pf3D7_05_v3:486602-516787(+):protein_length=10061:sequence_SO=chromosome:SO=protein_coding_seq45', 'PF3D7_0511500.1-p1:transcript=PF3D7_0511500.1:gene=PF3D7_0511500:organism=Plas…
DNINDNI	{'PF3D7_1343900.1-p1:transcript=PF3D7_1343900.1:gene=PF3D7_1343900:organism=Plasmodium_falciparum_3D7:gene_product=U4/U6_small_nuclear_ribonucleoprotein_PRP4__putative:transcript_product=U4/U6_small_nuclear_ribonucleoprotein_PRP4__putative:location=Pf3D7_13_v3:1756212-1758158(+):protein_length=648:sequence_SO=chromosome:SO=protein_coding_seq15', 'PF3D7_1343900.1-p1:transcript=PF3D7_1343900.1:gene…
KDTENKD|KDTEQKD	{'PF3D7_0505700.1-p1:transcript=PF3D7_0505700.1:gene=PF3D7_0505700:organism=Plasmodium_falciparum_3D7:gene_product=conserved_Plasmodium_membrane_protein__unknown_function:transcript_product=conserved_Plasmodium_membrane_protein__unknown_function:location=Pf3D7_05_v3:247801-250575(-):protein_length=924:sequence_SO=chromosome:SO=protein_coding_seq9', 'PF3D7_0500800.1-p1:transcript=PF3D7_0500800.1:g…
VQNVQNL	{'PFIT_0914100.1-p1:transcript=PFIT_0914100.1:gene=PFIT_0914100:organism=Plasmodium_falciparum_IT:gene_product=pseudouridylate_synthase__putative:transcript_product=pseudouridylate_synthase__putative:location=PfIT_09_v3:579330-582215(+):protein_length=961:sequence_SO=chromosome:SO=protein_coding_seq19', 'PFIT_0914100.1-p1:transcript=PFIT_0914100.1:gene=PFIT_0914100:organism=Plasmodium_falciparum_…
DKNDKNE	{'PFIT_0719200.1-p1:transcript=PFIT_0719200.1:gene=PFIT_0719200:organism=Plasmodium_falciparum_IT:gene_product=conserved_Plasmodium_membrane_protein__unknown_function:transcript_product=conserved_Plasmodium_membrane_protein__unknown_function:location=PfIT_07_v3:889238-899667(+):protein_length=3426:sequence_SO=chromosome:SO=protein_coding_seq47', 'PF3D7_0721000.1-p1:transcript=PF3D7_0721000.1:gene…
DEDLLFD	{'PF3D7_1149200.1-p1:transcript=PF3D7_1149200.1:gene=PF3D7_1149200:organism=Plasmodium_falciparum_3D7:gene_product=ring-infected_erythrocyte_surface_antigen:transcript_product=ring-infected_erythrocyte_surface_antigen:location=Pf3D7_11_v3:1976407-1979804(+):protein_length=1090:sequence_SO=chromosome:SO=protein_coding_seq17', 'PF3D7_0102200.1-p1:transcript=PF3D7_0102200.1:gene=PF3D7_0102200:organi…
KKDKIKT	{"PFIT_1102000.1-p1:transcript=PFIT_1102000.1:gene=PFIT_1102000:organism=Plasmodium_falciparum_IT:gene_product=Pfmc-2TM_Maurer's_cleft_two_transmembrane_protein:transcript_product=Pfmc-2TM_Maurer's_cleft_two_transmembrane_protein:location=PfIT_11_v3:21418-22192(+):protein_length=226:sequence_SO=chromosome:SO=protein_coding_seq3", "PFIT_0222000.1-p1:transcript=PFIT_0222000.1:gene=PFIT_0222000:orga…
NDNQMNN	{'PFIT_1021400.1-p1:transcript=PFIT_1021400.1:gene=PFIT_1021400:organism=Plasmodium_falciparum_IT:gene_product=conserved_Plasmodium_protein_(10b_antigen)__unknown_function:transcript_product=conserved_Plasmodium_protein_(10b_antigen)__unknown_function:location=PfIT_10_v3:840446-847246(-):protein_length=2266:sequence_SO=chromosome:SO=protein_coding_seq10', 'PFIT_1021400.1-p1:transcript=PFIT_102140…
HNNNDIK	{'PF3D7_1335400.1-p1:transcript=PF3D7_1335400.1:gene=PF3D7_1335400:organism=Plasmodium_falciparum_3D7:gene_product=reticulocyte_binding_protein_2_homologue_a:transcript_product=reticulocyte_binding_protein_2_homologue_a:location=Pf3D7_13_v3:1440779-1450385(+):protein_length=3130:sequence_SO=chromosome:SO=protein_coding_seq106', 'PF3D7_1335300.1-p1:transcript=PF3D7_1335300.1:gene=PF3D7_1335300:org…
KEEALKR	{'PF3D7_1335400.1-p1:transcript=PF3D7_1335400.1:gene=PF3D7_1335400:organism=Plasmodium_falciparum_3D7:gene_product=reticulocyte_binding_protein_2_homologue_a:transcript_product=reticulocyte_binding_protein_2_homologue_a:location=Pf3D7_13_v3:1440779-1450385(+):protein_length=3130:sequence_SO=chromosome:SO=protein_coding_seq110', 'PF3D7_1335400.1-p1:transcript=PF3D7_1335400.1:gene=PF3D7_1335400:org…
EKLNHSE|EKVNHSE	{'PF3D7_0220100.1-p1:transcript=PF3D7_0220100.1:gene=PF3D7_0220100:organism=Plasmodium_falciparum_3D7:gene_product=DnaJ_protein__putative:transcript_product=DnaJ_protein__putative:location=Pf3D7_02_v3:804520-807741(+):protein_length=997:sequence_SO=chromosome:SO=protein_coding_seq20', 'PF3D7_0220100.1-p1:transcript=PF3D7_0220100.1:gene=PF3D7_0220100:organism=Plasmodium_falciparum_3D7:gene_product…
KNNDNNK	{'PF3D7_0727800.1-p1:transcript=PF3D7_0727800.1:gene=PF3D7_0727800:organism=Plasmodium_falciparum_3D7:gene_product=cation_transporting_ATPase__putative:transcript_product=cation_transporting_ATPase__putative:location=Pf3D7_07_v3:1175944-1181700(+):protein_length=1918:sequence_SO=chromosome:SO=protein_coding_seq27', 'PF3D7_1229600.1-p1:transcript=PF3D7_1229600.1:gene=PF3D7_1229600:organism=Plasmod…
QEQLKKE	{'PF3D7_1335300.1-p1:transcript=PF3D7_1335300.1:gene=PF3D7_1335300:organism=Plasmodium_falciparum_3D7:gene_product=reticulocyte_binding_protein_2_homologue_b:transcript_product=reticulocyte_binding_protein_2_homologue_b:location=Pf3D7_13_v3:1428874-1438852(-):protein_length=3254:sequence_SO=chromosome:SO=protein_coding_seq108', 'PF3D7_1335400.1-p1:transcript=PF3D7_1335400.1:gene=PF3D7_1335400:org…
SNSTINN|TNSTINN	{'PF3D7_0800300.1-p1:transcript=PF3D7_0800300.1:gene=PF3D7_0800300:organism=Plasmodium_falciparum_3D7:gene_product=erythrocyte_membrane_protein_1__PfEMP1:transcript_product=erythrocyte_membrane_protein_1__PfEMP1:location=Pf3D7_08_v3:40948-50939(+):protein_length=2980:sequence_SO=chromosome:SO=protein_coding_seq17', 'PF08_0140_D2_seq14', 'PF08_0140_D2_seq13', 'PF3D7_1021800.1-p1:transcript=PF3D7_1…
ALKKQEQ|ALKRQEQ	{'PF3D7_1335400.1-p1:transcript=PF3D7_1335400.1:gene=PF3D7_1335400:organism=Plasmodium_falciparum_3D7:gene_product=reticulocyte_binding_protein_2_homologue_a:transcript_product=reticulocyte_binding_protein_2_homologue_a:location=Pf3D7_13_v3:1440779-1450385(+):protein_length=3130:sequence_SO=chromosome:SO=protein_coding_seq110', 'PF3D7_1335300.1-p1:transcript=PF3D7_1335300.1:gene=PF3D7_1335300:org…
YDDYDDY|YDDYEDY	{'PF3D7_1477500.1-p1:transcript=PF3D7_1477500.1:gene=PF3D7_1477500:organism=Plasmodium_falciparum_3D7:gene_product=Plasmodium_exported_protein_(PHISTb)__unknown_function:transcript_product=Plasmodium_exported_protein_(PHISTb)__unknown_function:location=Pf3D7_14_v3:3188888-3190548(+):protein_length=500:sequence_SO=chromosome:SO=protein_coding_seq16', 'PF3D7_1477500.1-p1:transcript=PF3D7_1477500.1:…
KLNDEAI	{'HB3var39_seq19', 'PF3D7_1040200.1-p1:transcript=PF3D7_1040200.1:gene=PF3D7_1040200:organism=Plasmodium_falciparum_3D7:gene_product=stevor:transcript_product=stevor:location=Pf3D7_10_v3:1605930-1606953(+):protein_length=305:sequence_SO=chromosome:SO=protein_coding_seq3', 'PFIT_0200600.1-p1:transcript=PFIT_0200600.1:gene=PFIT_0200600:organism=Plasmodium_falciparum_IT:gene_product=stevor:transcrip…
NDKNNNK	{'PF3D7_1348800.1-p1:transcript=PF3D7_1348800.1:gene=PF3D7_1348800:organism=Plasmodium_falciparum_3D7:gene_product=E1-E2_ATPase__putative:transcript_product=E1-E2_ATPase__putative:location=Pf3D7_13_v3:1959657-1965677(+):protein_length=1834:sequence_SO=chromosome:SO=protein_coding_seq13', 'PF3D7_0510000.1-p1:transcript=PF3D7_0510000.1:gene=PF3D7_0510000:organism=Plasmodium_falciparum_3D7:gene_prod…
EDENKEK|EEENKEK	{'PF3D7_1035700.1-p1:transcript=PF3D7_1035700.1:gene=PF3D7_1035700:organism=Plasmodium_falciparum_3D7:gene_product=duffy_binding-like_merozoite_surface_protein:transcript_product=duffy_binding-like_merozoite_surface_protein:location=Pf3D7_10_v3:1413200-1415293(+):protein_length=697:sequence_SO=chromosome:SO=protein_coding_seq25', 'PF3D7_1335100.1-p1:transcript=PF3D7_1335100.1:gene=PF3D7_1335100:o…
EENEENE	{'PFIT_1434600.1-p1:transcript=PFIT_1434600.1:gene=PFIT_1434600:organism=Plasmodium_falciparum_IT:gene_product=conserved_Plasmodium_membrane_protein__unknown_function:transcript_product=conserved_Plasmodium_membrane_protein__unknown_function:location=PfIT_14_v3:1338300-1355579(-):protein_length=5759:sequence_SO=chromosome:SO=protein_coding_seq228', 'PFD0995c_D3_seq10', 'PFD0995c_D3_seq11', 'PFIT_…
NKNNDNN	{'PF3D7_0727800.1-p1:transcript=PF3D7_0727800.1:gene=PF3D7_0727800:organism=Plasmodium_falciparum_3D7:gene_product=cation_transporting_ATPase__putative:transcript_product=cation_transporting_ATPase__putative:location=Pf3D7_07_v3:1175944-1181700(+):protein_length=1918:sequence_SO=chromosome:SO=protein_coding_seq27', 'PF3D7_1229600.1-p1:transcript=PF3D7_1229600.1:gene=PF3D7_1229600:organism=Plasmod…
NSINKLK|NTINKLK	{'PF3D7_0801000.1-p1:transcript=PF3D7_0801000.1:gene=PF3D7_0801000:organism=Plasmodium_falciparum_3D7:gene_product=Plasmodium_exported_protein_(PHISTc)__unknown_function:transcript_product=Plasmodium_exported_protein_(PHISTc)__unknown_function:location=Pf3D7_08_v3:84568-88422(-):protein_length=1219:sequence_SO=chromosome:SO=protein_coding_seq16', 'PF3D7_0801000.1-p1:transcript=PF3D7_0801000.1:gen…
NENNENS|NENNENT	{'PF3D7_0620400.1-p1:transcript=PF3D7_0620400.1:gene=PF3D7_0620400:organism=Plasmodium_falciparum_3D7:gene_product=merozoite_surface_protein_10:transcript_product=merozoite_surface_protein_10:location=Pf3D7_06_v3:851378-852955(-):protein_length=525:sequence_SO=chromosome:SO=protein_coding_seq6', 'PF3D7_0630900.1-p1:transcript=PF3D7_0630900.1:gene=PF3D7_0630900:organism=Plasmodium_falciparum_3D7:g…
IEKQIEE|IEKQVEE	{'PF3D7_0500800.1-p1:transcript=PF3D7_0500800.1:gene=PF3D7_0500800:organism=Plasmodium_falciparum_3D7:gene_product=mature_parasite-infected_erythrocyte_surface_antigen:transcript_product=mature_parasite-infected_erythrocyte_surface_antigen:location=Pf3D7_05_v3:43327-47761(-):protein_length=1434:sequence_SO=chromosome:SO=protein_coding_seq32', 'PF3D7_1442600.1-p1:transcript=PF3D7_1442600.1:gene=PF…
QQNVQQN	{'PF3D7_1474000.1-p1:transcript=PF3D7_1474000.1:gene=PF3D7_1474000:organism=Plasmodium_falciparum_3D7:gene_product=probable_protein__unknown_function:transcript_product=probable_protein__unknown_function:location=Pf3D7_14_v3:3011585-3017899(-):protein_length=2104:sequence_SO=chromosome:SO=protein_coding_seq67', 'PFIT_0518700.1-p1:transcript=PFIT_0518700.1:gene=PFIT_0518700:organism=Plasmodium_fal…
DIIKENV	{'PFIT_0713300.1-p1:transcript=PFIT_0713300.1:gene=PFIT_0713300:organism=Plasmodium_falciparum_IT:gene_product=conserved_Plasmodium_protein__unknown_function:transcript_product=conserved_Plasmodium_protein__unknown_function:location=PfIT_07_v3:662284-668904(-):protein_length=2206:sequence_SO=chromosome:SO=protein_coding_seq20', 'PF3D7_0715200.1-p1:transcript=PF3D7_0715200.1:gene=PF3D7_0715200:org…
SKEKEKD|SKEKERD	{'PF3D7_1026600.1-p1:transcript=PF3D7_1026600.1:gene=PF3D7_1026600:organism=Plasmodium_falciparum_3D7:gene_product=conserved_Plasmodium_protein__unknown_function:transcript_product=conserved_Plasmodium_protein__unknown_function:location=Pf3D7_10_v3:1113495-1118573(-):protein_length=1692:sequence_SO=chromosome:SO=protein_coding_seq9', 'PFIT_0112000.1-p1:transcript=PFIT_0112000.1:gene=PFIT_0112000:…
NYKKNTS	{'PFIT_0710900.1-p1:transcript=PFIT_0710900.1:gene=PFIT_0710900:organism=Plasmodium_falciparum_IT:gene_product=erythrocyte_membrane_protein_1__PfEMP1:transcript_product=erythrocyte_membrane_protein_1__PfEMP1:location=PfIT_07_v3:565906-575206(+):protein_length=2727:sequence_SO=chromosome:SO=protein_coding_seq102', 'PFCLINvar32_seq119', 'IGHvar25_seq80', 'RAJ116var38_seq77', 'PFCLINvar32_seq120', '…
EKVVEEE	{'PF3D7_1035900.1-p1:transcript=PF3D7_1035900.1:gene=PF3D7_1035900:organism=Plasmodium_falciparum_3D7:gene_product=probable_protein__unknown_function:transcript_product=probable_protein__unknown_function:location=Pf3D7_10_v3:1423983-1425683(+):protein_length=566:sequence_SO=chromosome:SO=protein_coding_seq19', 'PF3D7_1038400.1-p1:transcript=PF3D7_1038400.1:gene=PF3D7_1038400:organism=Plasmodium_f…
QQKEEAL	{'PF3D7_1335400.1-p1:transcript=PF3D7_1335400.1:gene=PF3D7_1335400:organism=Plasmodium_falciparum_3D7:gene_product=reticulocyte_binding_protein_2_homologue_a:transcript_product=reticulocyte_binding_protein_2_homologue_a:location=Pf3D7_13_v3:1440779-1450385(+):protein_length=3130:sequence_SO=chromosome:SO=protein_coding_seq110', 'PF3D7_1335300.1-p1:transcript=PF3D7_1335300.1:gene=PF3D7_1335300:org…
NQMNNNT	{'PFIT_1021400.1-p1:transcript=PFIT_1021400.1:gene=PFIT_1021400:organism=Plasmodium_falciparum_IT:gene_product=conserved_Plasmodium_protein_(10b_antigen)__unknown_function:transcript_product=conserved_Plasmodium_protein_(10b_antigen)__unknown_function:location=PfIT_10_v3:840446-847246(-):protein_length=2266:sequence_SO=chromosome:SO=protein_coding_seq10', 'PFIT_1021400.1-p1:transcript=PFIT_102140…
INKEENN|LNKEENN	{'PF3D7_1201400.1-p1:transcript=PF3D7_1201400.1:gene=PF3D7_1201400:organism=Plasmodium_falciparum_3D7:gene_product=Plasmodium_exported_protein__unknown_function:transcript_product=Plasmodium_exported_protein__unknown_function:location=Pf3D7_12_v3:93581-97146(-):protein_length=1129:sequence_SO=chromosome:SO=protein_coding_seq40', 'PF3D7_1372400.1-p1:transcript=PF3D7_1372400.1:gene=PF3D7_1372400:or…
EGSESDV	{'PF3D7_1250100.1-p1:transcript=PF3D7_1250100.1:gene=PF3D7_1250100:organism=Plasmodium_falciparum_3D7:gene_product=osmiophilic_body_protein_G377:transcript_product=osmiophilic_body_protein_G377:location=Pf3D7_12_v3:2045070-2054429(-):protein_length=3119:sequence_SO=chromosome:SO=protein_coding_seq43', 'PFIT_0101000.1-p1:transcript=PFIT_0101000.1:gene=PFIT_0101000:organism=Plasmodium_falciparum_IT…
IKDLGDE	{'PF3D7_1335400.1-p1:transcript=PF3D7_1335400.1:gene=PF3D7_1335400:organism=Plasmodium_falciparum_3D7:gene_product=reticulocyte_binding_protein_2_homologue_a:transcript_product=reticulocyte_binding_protein_2_homologue_a:location=Pf3D7_13_v3:1440779-1450385(+):protein_length=3130:sequence_SO=chromosome:SO=protein_coding_seq106', 'PF3D7_1335300.1-p1:transcript=PF3D7_1335300.1:gene=PF3D7_1335300:org…
DNNDKND	{'PFIT_0719200.1-p1:transcript=PFIT_0719200.1:gene=PFIT_0719200:organism=Plasmodium_falciparum_IT:gene_product=conserved_Plasmodium_membrane_protein__unknown_function:transcript_product=conserved_Plasmodium_membrane_protein__unknown_function:location=PfIT_07_v3:889238-899667(+):protein_length=3426:sequence_SO=chromosome:SO=protein_coding_seq47', 'PF3D7_1312700.1-p1:transcript=PF3D7_1312700.1:gene…
DIKEDII	{'PF3D7_0715200.1-p1:transcript=PF3D7_0715200.1:gene=PF3D7_0715200:organism=Plasmodium_falciparum_3D7:gene_product=conserved_Plasmodium_protein__unknown_function:transcript_product=conserved_Plasmodium_protein__unknown_function:location=Pf3D7_07_v3:676061-682681(-):protein_length=2206:sequence_SO=chromosome:SO=protein_coding_seq19', 'PF3D7_0715200.1-p1:transcript=PF3D7_0715200.1:gene=PF3D7_071520…
KNHNNNN|KNKNNNN|KNRNNNN	{'PF3D7_0218600.1-p1:transcript=PF3D7_0218600.1:gene=PF3D7_0218600:organism=Plasmodium_falciparum_3D7:gene_product=conserved_Plasmodium_protein__unknown_function:transcript_product=conserved_Plasmodium_protein__unknown_function:location=Pf3D7_02_v3:755418-762560(+):protein_length=2380:sequence_SO=chromosome:SO=protein_coding_seq40', 'PFIT_0812500.1-p1:transcript=PFIT_0812500.1:gene=PFIT_0812500:o…
EVKNEVK	{'PF3D7_0401900.1-p1:transcript=PF3D7_0401900.1:gene=PF3D7_0401900:organism=Plasmodium_falciparum_3D7:gene_product=acyl-CoA_synthetase:transcript_product=acyl-CoA_synthetase:location=Pf3D7_04_v3:108380-111295(-):protein_length=971:sequence_SO=chromosome:SO=protein_coding_seq33', 'PF3D7_0401900.1-p1:transcript=PF3D7_0401900.1:gene=PF3D7_0401900:organism=Plasmodium_falciparum_3D7:gene_product=acyl-…
KNGDDNK	{'PF3D7_0722200.1-p1:transcript=PF3D7_0722200.1:gene=PF3D7_0722200:organism=Plasmodium_falciparum_3D7:gene_product=rhoptry-associated_leucine_zipper-like_protein_1:transcript_product=rhoptry-associated_leucine_zipper-like_protein_1:location=Pf3D7_07_v3:946363-948612(+):protein_length=749:sequence_SO=chromosome:SO=protein_coding_seq17', 'PF3D7_0507800.1-p1:transcript=PF3D7_0507800.1:gene=PF3D7_050…
NIENNEN	{'PF3D7_0620400.1-p1:transcript=PF3D7_0620400.1:gene=PF3D7_0620400:organism=Plasmodium_falciparum_3D7:gene_product=merozoite_surface_protein_10:transcript_product=merozoite_surface_protein_10:location=Pf3D7_06_v3:851378-852955(-):protein_length=525:sequence_SO=chromosome:SO=protein_coding_seq6', 'PF3D7_0620400.1-p1:transcript=PF3D7_0620400.1:gene=PF3D7_0620400:organism=Plasmodium_falciparum_3D7:g…
KINEKSN|KINEKTN	{'PF3D7_0604500.1-p1:transcript=PF3D7_0604500.1:gene=PF3D7_0604500:organism=Plasmodium_falciparum_3D7:gene_product=conserved_Plasmodium_protein__unknown_function:transcript_product=conserved_Plasmodium_protein__unknown_function:location=Pf3D7_06_v3:189012-198078(+):protein_length=2874:sequence_SO=chromosome:SO=protein_coding_seq105', 'PF3D7_0604500.1-p1:transcript=PF3D7_0604500.1:gene=PF3D7_06045…
KNNDNKN	{'PF3D7_1471900.1-p1:transcript=PF3D7_1471900.1:gene=PF3D7_1471900:organism=Plasmodium_falciparum_3D7:gene_product=conserved_Plasmodium_protein__unknown_function:transcript_product=conserved_Plasmodium_protein__unknown_function:location=Pf3D7_14_v3:2933162-2939779(-):protein_length=2128:sequence_SO=chromosome:SO=protein_coding_seq19', 'PF3D7_1337200.1-p1:transcript=PF3D7_1337200.1:gene=PF3D7_1337…
NMDNMNN|NMENMNN	{'PF3D7_1419400.1-p1:transcript=PF3D7_1419400.1:gene=PF3D7_1419400:organism=Plasmodium_falciparum_3D7:gene_product=conserved_Plasmodium_membrane_protein__unknown_function:transcript_product=conserved_Plasmodium_membrane_protein__unknown_function:location=Pf3D7_14_v3:804425-811369(-):protein_length=2201:sequence_SO=chromosome:SO=protein_coding_seq22', 'PF3D7_1120600.1-p1:transcript=PF3D7_1120600.1…
IEEDVEE	{'PF3D7_0220000.1-p1:transcript=PF3D7_0220000.1:gene=PF3D7_0220000:organism=Plasmodium_falciparum_3D7:gene_product=liver_stage_antigen_3:transcript_product=liver_stage_antigen_3:location=Pf3D7_02_v3:796752-801586(+):protein_length=1558:sequence_SO=chromosome:SO=protein_coding_seq52', 'PF3D7_0220000.1-p1:transcript=PF3D7_0220000.1:gene=PF3D7_0220000:organism=Plasmodium_falciparum_3D7:gene_product=…
EEELKRQ	{'PF3D7_1335400.1-p1:transcript=PF3D7_1335400.1:gene=PF3D7_1335400:organism=Plasmodium_falciparum_3D7:gene_product=reticulocyte_binding_protein_2_homologue_a:transcript_product=reticulocyte_binding_protein_2_homologue_a:location=Pf3D7_13_v3:1440779-1450385(+):protein_length=3130:sequence_SO=chromosome:SO=protein_coding_seq110', 'PF3D7_1335400.1-p1:transcript=PF3D7_1335400.1:gene=PF3D7_1335400:org…
QQQKEEA	{'PF3D7_1335400.1-p1:transcript=PF3D7_1335400.1:gene=PF3D7_1335400:organism=Plasmodium_falciparum_3D7:gene_product=reticulocyte_binding_protein_2_homologue_a:transcript_product=reticulocyte_binding_protein_2_homologue_a:location=Pf3D7_13_v3:1440779-1450385(+):protein_length=3130:sequence_SO=chromosome:SO=protein_coding_seq110', 'PF3D7_1335300.1-p1:transcript=PF3D7_1335300.1:gene=PF3D7_1335300:org…
EENKNEI|EENKNEV	{'PF3D7_1420700.1-p1:transcript=PF3D7_1420700.1:gene=PF3D7_1420700:organism=Plasmodium_falciparum_3D7:gene_product=surface_protein_P113:transcript_product=surface_protein_P113:location=Pf3D7_14_v3:860011-863080(+):protein_length=969:sequence_SO=chromosome:SO=protein_coding_seq35', 'PFIT_0506500.1-p1:transcript=PFIT_0506500.1:gene=PFIT_0506500:organism=Plasmodium_falciparum_IT:gene_product=conserv…
QNVQNLQ	{'PFIT_0914100.1-p1:transcript=PFIT_0914100.1:gene=PFIT_0914100:organism=Plasmodium_falciparum_IT:gene_product=pseudouridylate_synthase__putative:transcript_product=pseudouridylate_synthase__putative:location=PfIT_09_v3:579330-582215(+):protein_length=961:sequence_SO=chromosome:SO=protein_coding_seq19', 'PFIT_0914100.1-p1:transcript=PFIT_0914100.1:gene=PFIT_0914100:organism=Plasmodium_falciparum_…
PSGTSPS	{'Plasmodiumfalciparum_AMA1_[K1_allele]_full-length_seq3', 'Plasmodiumfalciparum_AMA1_[K1_allele]_full-length_seq2', 'Plasmodiumfalciparum_AMA1_[K1_allele]_full-length_seq4', 'PF3D7_0930300.1-p1:transcript=PF3D7_0930300.1:gene=PF3D7_0930300:organism=Plasmodium_falciparum_3D7:gene_product=merozoite_surface_protein_1:transcript_product=merozoite_surface_protein_1:location=Pf3D7_09_v3:1201812-120697…
NDKSNEK	{'PFIT_1100300.1-p1:transcript=PFIT_1100300.1:gene=PFIT_1100300:organism=Plasmodium_falciparum_IT:gene_product=stevor:transcript_product=stevor:location=PfIT_11_v3:6292-7326(-):protein_length=307:sequence_SO=chromosome:SO=protein_coding_seq5', 'PFIT_1100300.1-p1:transcript=PFIT_1100300.1:gene=PFIT_1100300:organism=Plasmodium_falciparum_IT:gene_product=stevor:transcript_product=stevor:location=PfI…
QEEERKE	{'PF3D7_1335300.1-p1:transcript=PF3D7_1335300.1:gene=PF3D7_1335300:organism=Plasmodium_falciparum_3D7:gene_product=reticulocyte_binding_protein_2_homologue_b:transcript_product=reticulocyte_binding_protein_2_homologue_b:location=Pf3D7_13_v3:1428874-1438852(-):protein_length=3254:sequence_SO=chromosome:SO=protein_coding_seq108', 'PF3D7_1335400.1-p1:transcript=PF3D7_1335400.1:gene=PF3D7_1335400:org…
NKYNVDE	{'PF3D7_0803100.1-p1:transcript=PF3D7_0803100.1:gene=PF3D7_0803100:organism=Plasmodium_falciparum_3D7:gene_product=U3_small_nucleolar_RNA-associated_protein_14__putative:transcript_product=U3_small_nucleolar_RNA-associated_protein_14__putative:location=Pf3D7_08_v3:199181-202918(-):protein_length=1245:sequence_SO=chromosome:SO=protein_coding_seq32', 'PF3D7_0803100.1-p1:transcript=PF3D7_0803100.1:g…
VKDDVKD	{'PF3D7_0310200.1-p1:transcript=PF3D7_0310200.1:gene=PF3D7_0310200:organism=Plasmodium_falciparum_3D7:gene_product=phd_finger_protein__putative:transcript_product=phd_finger_protein__putative:location=Pf3D7_03_v3:427290-440942(+):protein_length=4550:sequence_SO=chromosome:SO=protein_coding_seq155', 'PF3D7_0310200.1-p1:transcript=PF3D7_0310200.1:gene=PF3D7_0310200:organism=Plasmodium_falciparum_3D…
NSIKNVS	{'PF3D7_1120600.1-p1:transcript=PF3D7_1120600.1:gene=PF3D7_1120600:organism=Plasmodium_falciparum_3D7:gene_product=conserved_Plasmodium_protein__unknown_function:transcript_product=conserved_Plasmodium_protein__unknown_function:location=Pf3D7_11_v3:775233-783639(-):protein_length=2545:sequence_SO=chromosome:SO=protein_coding_seq47', 'PF3D7_0311300.1-p1:transcript=PF3D7_0311300.1:gene=PF3D7_031130…
KNNKNNK	{'PF3D7_0302100.1-p1:transcript=PF3D7_0302100.1:gene=PF3D7_0302100:organism=Plasmodium_falciparum_3D7:gene_product=serine/threonine_protein_kinase:transcript_product=serine/threonine_protein_kinase:location=Pf3D7_03_v3:114070-118086(+):protein_length=1338:sequence_SO=chromosome:SO=protein_coding_seq37', 'PF3D7_1228800.1-p1:transcript=PF3D7_1228800.1:gene=PF3D7_1228800:organism=Plasmodium_falcipar…
NNKSNKI|NNKSNKV	{'PF3D7_0827600.1-p1:transcript=PF3D7_0827600.1:gene=PF3D7_0827600:organism=Plasmodium_falciparum_3D7:gene_product=conserved_Plasmodium_protein__unknown_function:transcript_product=conserved_Plasmodium_protein__unknown_function:location=Pf3D7_08_v3:1187623-1192925(-):protein_length=1684:sequence_SO=chromosome:SO=protein_coding_seq57', 'PF3D7_1035300.1-p1:transcript=PF3D7_1035300.1:gene=PF3D7_1035…
GNVNGNI|GNVNGNV	{'PF3D7_0407800.1-p1:transcript=PF3D7_0407800.1:gene=PF3D7_0407800:organism=Plasmodium_falciparum_3D7:gene_product=conserved_Plasmodium_protein__unknown_function:transcript_product=conserved_Plasmodium_protein__unknown_function:location=Pf3D7_04_v3:384924-390806(+):protein_length=1960:sequence_SO=chromosome:SO=protein_coding_seq47', 'PFIT_0515500.1-p1:transcript=PFIT_0515500.1:gene=PFIT_0515500:o…
LKNTPSE	{'PF3D7_0201900.1-p1:transcript=PF3D7_0201900.1:gene=PF3D7_0201900:organism=Plasmodium_falciparum_3D7:gene_product=erythrocyte_membrane_protein_3:transcript_product=erythrocyte_membrane_protein_3:location=Pf3D7_02_v3:91318-98838(-):protein_length=2441:sequence_SO=chromosome:SO=protein_coding_seq71', 'PF3D7_0201900.1-p1:transcript=PF3D7_0201900.1:gene=PF3D7_0201900:organism=Plasmodium_falciparum_3…
NMDNMNN	{'PF3D7_1419400.1-p1:transcript=PF3D7_1419400.1:gene=PF3D7_1419400:organism=Plasmodium_falciparum_3D7:gene_product=conserved_Plasmodium_membrane_protein__unknown_function:transcript_product=conserved_Plasmodium_membrane_protein__unknown_function:location=Pf3D7_14_v3:804425-811369(-):protein_length=2201:sequence_SO=chromosome:SO=protein_coding_seq22', 'PF3D7_1120600.1-p1:transcript=PF3D7_1120600.1…
PADASDS	{'Plasmodiumfalciparum_AMA1_[K1_allele]_full-length_seq4', 'PF3D7_0930300.1-p1:transcript=PF3D7_0930300.1:gene=PF3D7_0930300:organism=Plasmodium_falciparum_3D7:gene_product=merozoite_surface_protein_1:transcript_product=merozoite_surface_protein_1:location=Pf3D7_09_v3:1201812-1206974(+):protein_length=1720:sequence_SO=chromosome:SO=protein_coding_seq5', 'PF3D7_0930300.1-p1:transcript=PF3D7_093030…
NDKIDNI	{'PF3D7_1312700.1-p1:transcript=PF3D7_1312700.1:gene=PF3D7_1312700:organism=Plasmodium_falciparum_3D7:gene_product=conserved_Plasmodium_protein__unknown_function:transcript_product=conserved_Plasmodium_protein__unknown_function:location=Pf3D7_13_v3:532270-533958(-):protein_length=562:sequence_SO=chromosome:SO=protein_coding_seq8', 'PF3D7_1312700.1-p1:transcript=PF3D7_1312700.1:gene=PF3D7_1312700:…
QERLQKE	{'PF3D7_1335400.1-p1:transcript=PF3D7_1335400.1:gene=PF3D7_1335400:organism=Plasmodium_falciparum_3D7:gene_product=reticulocyte_binding_protein_2_homologue_a:transcript_product=reticulocyte_binding_protein_2_homologue_a:location=Pf3D7_13_v3:1440779-1450385(+):protein_length=3130:sequence_SO=chromosome:SO=protein_coding_seq110', 'PF3D7_1335400.1-p1:transcript=PF3D7_1335400.1:gene=PF3D7_1335400:org…
NVPSGID|NVPSGLD	{'PF3D7_1035300.1-p1:transcript=PF3D7_1035300.1:gene=PF3D7_1035300:organism=Plasmodium_falciparum_3D7:gene_product=glutamate-rich_protein:transcript_product=glutamate-rich_protein:location=Pf3D7_10_v3:1399195-1402896(+):protein_length=1233:sequence_SO=chromosome:SO=protein_coding_seq4', 'IGHvar07_seq77', 'PF3D7_1035300.1-p1:transcript=PF3D7_1035300.1:gene=PF3D7_1035300:organism=Plasmodium_falcipa…
DVKDDND	{'PF3D7_0904900.1-p1:transcript=PF3D7_0904900.1:gene=PF3D7_0904900:organism=Plasmodium_falciparum_3D7:gene_product=copper-transporting_ATPase:transcript_product=copper-transporting_ATPase:location=Pf3D7_09_v3:224875-232831(-):protein_length=2568:sequence_SO=chromosome:SO=protein_coding_seq54', 'PF3D7_0310200.1-p1:transcript=PF3D7_0310200.1:gene=PF3D7_0310200:organism=Plasmodium_falciparum_3D7:gen…
IKDDNIK	{'PF3D7_0918700.1-p1:transcript=PF3D7_0918700.1:gene=PF3D7_0918700:organism=Plasmodium_falciparum_3D7:gene_product=conserved_Plasmodium_protein__unknown_function:transcript_product=conserved_Plasmodium_protein__unknown_function:location=Pf3D7_09_v3:769452-772105(+):protein_length=737:sequence_SO=chromosome:SO=protein_coding_seq14', 'PF3D7_0918700.1-p1:transcript=PF3D7_0918700.1:gene=PF3D7_0918700…
LNHSEKL|VNHSEKL	{'PF3D7_0220100.1-p1:transcript=PF3D7_0220100.1:gene=PF3D7_0220100:organism=Plasmodium_falciparum_3D7:gene_product=DnaJ_protein__putative:transcript_product=DnaJ_protein__putative:location=Pf3D7_02_v3:804520-807741(+):protein_length=997:sequence_SO=chromosome:SO=protein_coding_seq20', 'PF3D7_0220100.1-p1:transcript=PF3D7_0220100.1:gene=PF3D7_0220100:organism=Plasmodium_falciparum_3D7:gene_product…
KELLNKD|KELLNKE	{'PF3D7_1117900.1-p1:transcript=PF3D7_1117900.1:gene=PF3D7_1117900:organism=Plasmodium_falciparum_3D7:gene_product=conserved_Plasmodium_protein__unknown_function:transcript_product=conserved_Plasmodium_protein__unknown_function:location=Pf3D7_11_v3:678752-683281(+):protein_length=1471:sequence_SO=chromosome:SO=protein_coding_seq53', 'PF3D7_0201900.1-p1:transcript=PF3D7_0201900.1:gene=PF3D7_020190…
VVEEVQD|VVEEVQE	{'PF3D7_1038400.1-p1:transcript=PF3D7_1038400.1:gene=PF3D7_1038400:organism=Plasmodium_falciparum_3D7:gene_product=gametocyte-specific_protein:transcript_product=gametocyte-specific_protein:location=Pf3D7_10_v3:1519021-1547825(+):protein_length=9563:sequence_SO=chromosome:SO=protein_coding_seq97', 'PF3D7_1038400.1-p1:transcript=PF3D7_1038400.1:gene=PF3D7_1038400:organism=Plasmodium_falciparum_3D7…
NEKNEKI	{'PF3D7_1417200.1-p1:transcript=PF3D7_1417200.1:gene=PF3D7_1417200:organism=Plasmodium_falciparum_3D7:gene_product=NOT_family_protein__putative:transcript_product=NOT_family_protein__putative:location=Pf3D7_14_v3:694585-708177(+):protein_length=4466:sequence_SO=chromosome:SO=protein_coding_seq45', 'PF3D7_1417200.1-p1:transcript=PF3D7_1417200.1:gene=PF3D7_1417200:organism=Plasmodium_falciparum_3D7…
SPPADAS	{'Plasmodiumfalciparum_AMA1_[K1_allele]_full-length_seq4', 'PF3D7_0930300.1-p1:transcript=PF3D7_0930300.1:gene=PF3D7_0930300:organism=Plasmodium_falciparum_3D7:gene_product=merozoite_surface_protein_1:transcript_product=merozoite_surface_protein_1:location=Pf3D7_09_v3:1201812-1206974(+):protein_length=1720:sequence_SO=chromosome:SO=protein_coding_seq5', 'PF3D7_0930300.1-p1:transcript=PF3D7_093030…
NTNNNDK	{'PF3D7_1337500.1-p1:transcript=PF3D7_1337500.1:gene=PF3D7_1337500:organism=Plasmodium_falciparum_3D7:gene_product=conserved_Plasmodium_protein__unknown_function:transcript_product=conserved_Plasmodium_protein__unknown_function:location=Pf3D7_13_v3:1509589-1519593(-):protein_length=3334:sequence_SO=chromosome:SO=protein_coding_seq50', 'PF3D7_1337500.1-p1:transcript=PF3D7_1337500.1:gene=PF3D7_1337…
IEKQVEE	{'PF3D7_0500800.1-p1:transcript=PF3D7_0500800.1:gene=PF3D7_0500800:organism=Plasmodium_falciparum_3D7:gene_product=mature_parasite-infected_erythrocyte_surface_antigen:transcript_product=mature_parasite-infected_erythrocyte_surface_antigen:location=Pf3D7_05_v3:43327-47761(-):protein_length=1434:sequence_SO=chromosome:SO=protein_coding_seq32', 'PF3D7_1442600.1-p1:transcript=PF3D7_1442600.1:gene=PF…
EVIEEVV	{'PF3D7_1038400.1-p1:transcript=PF3D7_1038400.1:gene=PF3D7_1038400:organism=Plasmodium_falciparum_3D7:gene_product=gametocyte-specific_protein:transcript_product=gametocyte-specific_protein:location=Pf3D7_10_v3:1519021-1547825(+):protein_length=9563:sequence_SO=chromosome:SO=protein_coding_seq174', 'PF3D7_1038400.1-p1:transcript=PF3D7_1038400.1:gene=PF3D7_1038400:organism=Plasmodium_falciparum_3D…
VVNLSDK	{'PF3D7_0919900.1-p1:transcript=PF3D7_0919900.1:gene=PF3D7_0919900:organism=Plasmodium_falciparum_3D7:gene_product=regulator_of_chromosome_condensation__putative:transcript_product=regulator_of_chromosome_condensation__putative:location=Pf3D7_09_v3:809659-819804(-):protein_length=3381:sequence_SO=chromosome:SO=protein_coding_seq24', 'PFIT_0920000.1-p1:transcript=PFIT_0920000.1:gene=PFIT_0920000:o…
PTQDADT	{'PF3D7_1255200.1-p1:transcript=PF3D7_1255200.1:gene=PF3D7_1255200:organism=Plasmodium_falciparum_3D7:gene_product=erythrocyte_membrane_protein_1__PfEMP1:transcript_product=erythrocyte_membrane_protein_1__PfEMP1:location=Pf3D7_12_v3:2241271-2248962(-):protein_length=2268:sequence_SO=chromosome:SO=protein_coding_seq31', 'PF3D7_1255200.1-p1:transcript=PF3D7_1255200.1:gene=PF3D7_1255200:organism=Pla…
EDLLFDL	{'PF3D7_1149200.1-p1:transcript=PF3D7_1149200.1:gene=PF3D7_1149200:organism=Plasmodium_falciparum_3D7:gene_product=ring-infected_erythrocyte_surface_antigen:transcript_product=ring-infected_erythrocyte_surface_antigen:location=Pf3D7_11_v3:1976407-1979804(+):protein_length=1090:sequence_SO=chromosome:SO=protein_coding_seq17', 'PF3D7_0102200.1-p1:transcript=PF3D7_0102200.1:gene=PF3D7_0102200:organi…
DNKDNIY	{'PF3D7_0620400.1-p1:transcript=PF3D7_0620400.1:gene=PF3D7_0620400:organism=Plasmodium_falciparum_3D7:gene_product=merozoite_surface_protein_10:transcript_product=merozoite_surface_protein_10:location=Pf3D7_06_v3:851378-852955(-):protein_length=525:sequence_SO=chromosome:SO=protein_coding_seq3', 'PF3D7_1108100.1-p1:transcript=PF3D7_1108100.1:gene=PF3D7_1108100:organism=Plasmodium_falciparum_3D7:g…
EQERLER	{'PF3D7_1335400.1-p1:transcript=PF3D7_1335400.1:gene=PF3D7_1335400:organism=Plasmodium_falciparum_3D7:gene_product=reticulocyte_binding_protein_2_homologue_a:transcript_product=reticulocyte_binding_protein_2_homologue_a:location=Pf3D7_13_v3:1440779-1450385(+):protein_length=3130:sequence_SO=chromosome:SO=protein_coding_seq110', 'PF3D7_1335300.1-p1:transcript=PF3D7_1335300.1:gene=PF3D7_1335300:org…
TNDNQMN	{'PFIT_1021400.1-p1:transcript=PFIT_1021400.1:gene=PFIT_1021400:organism=Plasmodium_falciparum_IT:gene_product=conserved_Plasmodium_protein_(10b_antigen)__unknown_function:transcript_product=conserved_Plasmodium_protein_(10b_antigen)__unknown_function:location=PfIT_10_v3:840446-847246(-):protein_length=2266:sequence_SO=chromosome:SO=protein_coding_seq10', 'PFIT_1021400.1-p1:transcript=PFIT_102140…
SLISENN|TLISENN	{'PFIT_0101000.1-p1:transcript=PFIT_0101000.1:gene=PFIT_0101000:organism=Plasmodium_falciparum_IT:gene_product=erythrocyte_binding_antigen-181:transcript_product=erythrocyte_binding_antigen-181:location=PfIT_01_v3:53160-58235(-):protein_length=1575:sequence_SO=chromosome:SO=protein_coding_seq51', 'PFIT_0101000.1-p1:transcript=PFIT_0101000.1:gene=PFIT_0101000:organism=Plasmodium_falciparum_IT:gene…
TNTDPND	{'PF3D7_1016300.1-p1:transcript=PF3D7_1016300.1:gene=PF3D7_1016300:organism=Plasmodium_falciparum_3D7:gene_product=glycophorin_binding_protein:transcript_product=glycophorin_binding_protein:location=Pf3D7_10_v3:650898-653567(-):protein_length=824:sequence_SO=chromosome:SO=protein_coding_seq31', 'PF3D7_1016300.1-p1:transcript=PF3D7_1016300.1:gene=PF3D7_1016300:organism=Plasmodium_falciparum_3D7:ge…
IYDDHIY|IYDDRIY	{'PFIT_1325800.1-p1:transcript=PFIT_1325800.1:gene=PFIT_1325800:organism=Plasmodium_falciparum_IT:gene_product=conserved_Plasmodium_protein__unknown_function:transcript_product=conserved_Plasmodium_protein__unknown_function:location=PfIT_13_v3:1072422-1087117(+):protein_length=4788:sequence_SO=chromosome:SO=protein_coding_seq85', 'PF3D7_0203200.1-p1:transcript=PF3D7_0203200.1:gene=PF3D7_0203200:o…
DDDGNKK|DDEGNKK	{'PF3D7_0317300.1-p1:transcript=PF3D7_0317300.1:gene=PF3D7_0317300:organism=Plasmodium_falciparum_3D7:gene_product=conserved_Plasmodium_protein__unknown_function:transcript_product=conserved_Plasmodium_protein__unknown_function:location=Pf3D7_03_v3:699544-709728(-):protein_length=3394:sequence_SO=chromosome:SO=protein_coding_seq42', 'PF3D7_1133400.1-p1:transcript=PF3D7_1133400.1:gene=PF3D7_113340…
DEDNNNK	{'PF3D7_0803100.1-p1:transcript=PF3D7_0803100.1:gene=PF3D7_0803100:organism=Plasmodium_falciparum_3D7:gene_product=U3_small_nucleolar_RNA-associated_protein_14__putative:transcript_product=U3_small_nucleolar_RNA-associated_protein_14__putative:location=Pf3D7_08_v3:199181-202918(-):protein_length=1245:sequence_SO=chromosome:SO=protein_coding_seq32', 'PF3D7_0803100.1-p1:transcript=PF3D7_0803100.1:g…
QEQERLE	{'PF3D7_1335400.1-p1:transcript=PF3D7_1335400.1:gene=PF3D7_1335400:organism=Plasmodium_falciparum_3D7:gene_product=reticulocyte_binding_protein_2_homologue_a:transcript_product=reticulocyte_binding_protein_2_homologue_a:location=Pf3D7_13_v3:1440779-1450385(+):protein_length=3130:sequence_SO=chromosome:SO=protein_coding_seq110', 'PF3D7_1335400.1-p1:transcript=PF3D7_1335400.1:gene=PF3D7_1335400:org…
EVTEELI|EVTEEVI	{'PF3D7_1035900.1-p1:transcript=PF3D7_1035900.1:gene=PF3D7_1035900:organism=Plasmodium_falciparum_3D7:gene_product=probable_protein__unknown_function:transcript_product=probable_protein__unknown_function:location=Pf3D7_10_v3:1423983-1425683(+):protein_length=566:sequence_SO=chromosome:SO=protein_coding_seq11', 'PF3D7_1038400.1-p1:transcript=PF3D7_1038400.1:gene=PF3D7_1038400:organism=Plasmodium_f…
HSEKVNH	{'PF3D7_0220100.1-p1:transcript=PF3D7_0220100.1:gene=PF3D7_0220100:organism=Plasmodium_falciparum_3D7:gene_product=DnaJ_protein__putative:transcript_product=DnaJ_protein__putative:location=Pf3D7_02_v3:804520-807741(+):protein_length=997:sequence_SO=chromosome:SO=protein_coding_seq20', 'PF3D7_0220100.1-p1:transcript=PF3D7_0220100.1:gene=PF3D7_0220100:organism=Plasmodium_falciparum_3D7:gene_product…
DNKKCDD|DNKKCDE	{'PF3D7_1362900.1-p1:transcript=PF3D7_1362900.1:gene=PF3D7_1362900:organism=Plasmodium_falciparum_3D7:gene_product=conserved_Plasmodium_protein__unknown_function:transcript_product=conserved_Plasmodium_protein__unknown_function:location=Pf3D7_13_v3:2526360-2531483(+):protein_length=1636:sequence_SO=chromosome:SO=protein_coding_seq26', 'PFIT_0102100.1-p1:transcript=PFIT_0102100.1:gene=PFIT_0102100…
TTKGASA	{'PF3D7_0930300.1-p1:transcript=PF3D7_0930300.1:gene=PF3D7_0930300:organism=Plasmodium_falciparum_3D7:gene_product=merozoite_surface_protein_1:transcript_product=merozoite_surface_protein_1:location=Pf3D7_09_v3:1201812-1206974(+):protein_length=1720:sequence_SO=chromosome:SO=protein_coding_seq3', 'Plasmodiumfalciparum_AMA1_[K1_allele]_full-length_seq2', 'PF3D7_0930300.1-p1:transcript=PF3D7_093030…
HNINDNI|RNINDNI	{'PF3D7_1245600.1-p1:transcript=PF3D7_1245600.1:gene=PF3D7_1245600:organism=Plasmodium_falciparum_3D7:gene_product=kinesin__putative:transcript_product=kinesin__putative:location=Pf3D7_12_v3:1900249-1905066(-):protein_length=1605:sequence_SO=chromosome:SO=protein_coding_seq21', 'PF3D7_0705500.1-p1:transcript=PF3D7_0705500.1:gene=PF3D7_0705500:organism=Plasmodium_falciparum_3D7:gene_product=inosit…
IIKENVK	{'PFIT_0713300.1-p1:transcript=PFIT_0713300.1:gene=PFIT_0713300:organism=Plasmodium_falciparum_IT:gene_product=conserved_Plasmodium_protein__unknown_function:transcript_product=conserved_Plasmodium_protein__unknown_function:location=PfIT_07_v3:662284-668904(-):protein_length=2206:sequence_SO=chromosome:SO=protein_coding_seq20', 'PF3D7_0715200.1-p1:transcript=PF3D7_0715200.1:gene=PF3D7_0715200:org…
QKIILKD	{'PF3D7_1040700.1-p1:transcript=PF3D7_1040700.1:gene=PF3D7_1040700:organism=Plasmodium_falciparum_3D7:gene_product=rifin:transcript_product=rifin:location=Pf3D7_10_v3:1622368-1623684(+):protein_length=372:sequence_SO=chromosome:SO=protein_coding_seq3', 'PFIT_bin07100.1-p1:transcript=PFIT_bin07100.1:gene=PFIT_bin07100:organism=Plasmodium_falciparum_IT:gene_product=rifin:transcript_product=rifin:lo…
ript_product=rifin:location=Pf3D7_01_v3:604162-605531(+):protein_length=379:sequence_SO=chromosome:SO=protein_coding_seq3', 'PF3D7_1300400.1-p1:transcript=PF3D7_1300400.1:gene=PF3D7_1300400:organism=Plasmodium_falciparum_3D7:gene_product=rifin:transcript_product=rifin:location=Pf3D7_13_v3:47583-48769(+):protein_length=343:sequence_SO=chromosome:SO=protein_coding_seq3', 'PF3D7_0425700.1-p1:transcr…
NYNIKNT	{'PFIT_1228500.1-p1:transcript=PFIT_1228500.1:gene=PFIT_1228500:organism=Plasmodium_falciparum_IT:gene_product=conserved_Plasmodium_protein__unknown_function:transcript_product=conserved_Plasmodium_protein__unknown_function:location=PfIT_12_v3:1121130-1130633(-):protein_length=3167:sequence_SO=chromosome:SO=protein_coding_seq78', 'PFIT_1228500.1-p1:transcript=PFIT_1228500.1:gene=PFIT_1228500:orga…
EENKNKE	{'PF3D7_0202000.1-p1:transcript=PF3D7_0202000.1:gene=PF3D7_0202000:organism=Plasmodium_falciparum_3D7:gene_product=knob-associated_histidine-rich_protein:transcript_product=knob-associated_histidine-rich_protein:location=Pf3D7_02_v3:103385-105796(-):protein_length=654:sequence_SO=chromosome:SO=protein_coding_seq18', 'PF3D7_0931700.1-p1:transcript=PF3D7_0931700.1:gene=PF3D7_0931700:organism=Plasmo…
YDKEKLK|YEKEKLK	{'PF3D7_0731600.1-p1:transcript=PF3D7_0731600.1:gene=PF3D7_0731600:organism=Plasmodium_falciparum_3D7:gene_product=acyl-CoA_synthetase:transcript_product=acyl-CoA_synthetase:location=Pf3D7_07_v3:1368161-1370596(+):protein_length=811:sequence_SO=chromosome:SO=protein_coding_seq10', 'PF3D7_0220100.1-p1:transcript=PF3D7_0220100.1:gene=PF3D7_0220100:organism=Plasmodium_falciparum_3D7:gene_product=Dna…
KKKDNKN	{'PFIT_0703500.1-p1:transcript=PFIT_0703500.1:gene=PFIT_0703500:organism=Plasmodium_falciparum_IT:gene_product=E3_ubiquitin-protein_ligase:transcript_product=E3_ubiquitin-protein_ligase:location=PfIT_07_v3:247471-260416(-):protein_length=3908:sequence_SO=chromosome:SO=protein_coding_seq59', 'PF3D7_0904900.1-p1:transcript=PF3D7_0904900.1:gene=PF3D7_0904900:organism=Plasmodium_falciparum_3D7:gene_p…
EEVLEEE	{'PF3D7_1149000.1-p1:transcript=PF3D7_1149000.1:gene=PF3D7_1149000:organism=Plasmodium_falciparum_3D7:gene_product=antigen_332__DBL-like_protein:transcript_product=antigen_332__DBL-like_protein:location=Pf3D7_11_v3:1950210-1968726(+):protein_length=6093:sequence_SO=chromosome:SO=protein_coding_seq81', 'PF3D7_1149000.1-p1:transcript=PF3D7_1149000.1:gene=PF3D7_1149000:organism=Plasmodium_falciparum…
KLTEEEK	{'PF3D7_1038400.1-p1:transcript=PF3D7_1038400.1:gene=PF3D7_1038400:organism=Plasmodium_falciparum_3D7:gene_product=gametocyte-specific_protein:transcript_product=gametocyte-specific_protein:location=Pf3D7_10_v3:1519021-1547825(+):protein_length=9563:sequence_SO=chromosome:SO=protein_coding_seq25', 'PF3D7_1422700.1-p1:transcript=PF3D7_1422700.1:gene=PF3D7_1422700:organism=Plasmodium_falciparum_3D7…
KNKLKED	{'PF3D7_1002000.1-p1:transcript=PF3D7_1002000.1:gene=PF3D7_1002000:organism=Plasmodium_falciparum_3D7:gene_product=Plasmodium_exported_protein_(hyp2)__unknown_function:transcript_product=Plasmodium_exported_protein_(hyp2)__unknown_function:location=Pf3D7_10_v3:103118-104683(-):protein_length=469:sequence_SO=chromosome:SO=protein_coding_seq13', 'PF3D7_1002000.1-p1:transcript=PF3D7_1002000.1:gene=P…
DIKNDDI|DIKNDDV	{'PF3D7_0925800.1-p1:transcript=PF3D7_0925800.1:gene=PF3D7_0925800:organism=Plasmodium_falciparum_3D7:gene_product=conserved_Plasmodium_protein__unknown_function:transcript_product=conserved_Plasmodium_protein__unknown_function:location=Pf3D7_09_v3:1033315-1038579(+):protein_length=1754:sequence_SO=chromosome:SO=protein_coding_seq22', 'PF3D7_1359700.1-p1:transcript=PF3D7_1359700.1:gene=PF3D7_1359…
DKNNDNT|DRNNDNT	{'PF3D7_0918700.1-p1:transcript=PF3D7_0918700.1:gene=PF3D7_0918700:organism=Plasmodium_falciparum_3D7:gene_product=conserved_Plasmodium_protein__unknown_function:transcript_product=conserved_Plasmodium_protein__unknown_function:location=Pf3D7_09_v3:769452-772105(+):protein_length=737:sequence_SO=chromosome:SO=protein_coding_seq14', 'PF3D7_0918700.1-p1:transcript=PF3D7_0918700.1:gene=PF3D7_0918700…
ERERIEK	{'PF3D7_1335300.1-p1:transcript=PF3D7_1335300.1:gene=PF3D7_1335300:organism=Plasmodium_falciparum_3D7:gene_product=reticulocyte_binding_protein_2_homologue_b:transcript_product=reticulocyte_binding_protein_2_homologue_b:location=Pf3D7_13_v3:1428874-1438852(-):protein_length=3254:sequence_SO=chromosome:SO=protein_coding_seq108', 'PF3D7_1335400.1-p1:transcript=PF3D7_1335400.1:gene=PF3D7_1335400:org…
NLIRNNT|NLLRNNT	{'PF3D7_0832900.1-p1:transcript=PF3D7_0832900.1:gene=PF3D7_0832900:organism=Plasmodium_falciparum_3D7:gene_product=stevor:transcript_product=stevor:location=Pf3D7_08_v3:1414283-1415293(+):protein_length=304:sequence_SO=chromosome:SO=protein_coding_seq2', 'IGHvar39_seq16', 'PFIT_0100300.1-p1:transcript=PFIT_0100300.1:gene=PFIT_0100300:organism=Plasmodium_falciparum_IT:gene_product=stevor:transcrip…
VTEELIE	{'PF3D7_1035900.1-p1:transcript=PF3D7_1035900.1:gene=PF3D7_1035900:organism=Plasmodium_falciparum_3D7:gene_product=probable_protein__unknown_function:transcript_product=probable_protein__unknown_function:location=Pf3D7_10_v3:1423983-1425683(+):protein_length=566:sequence_SO=chromosome:SO=protein_coding_seq11', 'PF3D7_1038400.1-p1:transcript=PF3D7_1038400.1:gene=PF3D7_1038400:organism=Plasmodium_f…
TDEDLLF	{'PF3D7_1149200.1-p1:transcript=PF3D7_1149200.1:gene=PF3D7_1149200:organism=Plasmodium_falciparum_3D7:gene_product=ring-infected_erythrocyte_surface_antigen:transcript_product=ring-infected_erythrocyte_surface_antigen:location=Pf3D7_11_v3:1976407-1979804(+):protein_length=1090:sequence_SO=chromosome:SO=protein_coding_seq17', 'PF3D7_0102200.1-p1:transcript=PF3D7_0102200.1:gene=PF3D7_0102200:organi…

## Sheet: Protein pairs
List of inter-protein motifs shared between a pair of proteins. Motifs reported here are 7-mers with at least 5 identical amino acids and upto two conservative substitutions (and no wildcards).
Protein (A)	Interacting protein (B)	Motifs shared between A & B
PF3D7_0313400.1-p1conserved_Plasmodium_protein__unknown_function	PF3D7_0721000.1-p1conserved_Plasmodium_membrane_protein__unknown_function	{'EKNEKNE', 'KNEKNEK', 'NEKNEKN'}
PF3D7_0313400.1-p1conserved_Plasmodium_protein__unknown_function	PFIT_0405500.1-p1conserved_Plasmodium_protein__unknown_function	{'KNEKNEK', 'NEKNEKN'}
PF3D7_0313400.1-p1conserved_Plasmodium_protein__unknown_function	PF3D7_0516000.1-p1RAP_protein__putative	{'EKNEKNE', 'KNEKNEK', 'NEKNEKN'}
PF3D7_0313400.1-p1conserved_Plasmodium_protein__unknown_function	PF3D7_0319700.1-p1ABC_transporter_I_family_member_1__putative	{'NEKNEKN'}
PF3D7_0313400.1-p1conserved_Plasmodium_protein__unknown_function	PFIT_0719200.1-p1conserved_Plasmodium_membrane_protein__unknown_function	{'EKNEKNE', 'KNEKNEK', 'NEKNEKN'}
PF3D7_0313400.1-p1conserved_Plasmodium_protein__unknown_function	PFIT_1143800.1-p1transcription_factor_with_AP2_domain(s)	{'EKNEKNE', 'KNEKNEK', 'ENEKNEK', 'NEKNEKN'}
PF3D7_0313400.1-p1conserved_Plasmodium_protein__unknown_function	PF3D7_1218900.1-p1conserved_Plasmodium_protein__unknown_function	{'EKNEKNE', 'KNEKNEK', 'NEKNEKN'}
PF3D7_0313400.1-p1conserved_Plasmodium_protein__unknown_function	PF3D7_1231600.1-p1pre-mRNA-splicing_factor_ATP-dependent_RNA_helicase_PRP2__putative	{'KNEKNEK', 'NEKNEKN'}
PF3D7_0313400.1-p1conserved_Plasmodium_protein__unknown_function	PF3D7_1143100.1-p1AP2_domain_transcription_factor_AP2-O__putative	{'EKNEKNE', 'KNEKNEK', 'ENEKNEK', 'NEKNEKN'}
PF3D7_0313400.1-p1conserved_Plasmodium_protein__unknown_function	PF3D7_1017600.1-p1conserved_Plasmodium_protein__unknown_function	{'EKNEKNE', 'ENEKNEK', 'NEKNEKN'}
PF3D7_0313400.1-p1conserved_Plasmodium_protein__unknown_function	PFIT_0111800.1-p1Plasmodium_exported_protein__unknown_function	{'EKNEKNE', 'KNEKNEK', 'NEKNEKN'}
PF3D7_0721000.1-p1conserved_Plasmodium_membrane_protein__unknown_function	PFIT_0405500.1-p1conserved_Plasmodium_protein__unknown_function	{'KNEKNEK', 'NEKNEKN'}
PF3D7_0516000.1-p1RAP_protein__putative	PF3D7_0721000.1-p1conserved_Plasmodium_membrane_protein__unknown_function	{'EKNEKNE', 'KNEKNEK', 'NEKNEKN'}
PF3D7_0319700.1-p1ABC_transporter_I_family_member_1__putative	PF3D7_0721000.1-p1conserved_Plasmodium_membrane_protein__unknown_function	{'NEKNEKN'}
PF3D7_0721000.1-p1conserved_Plasmodium_membrane_protein__unknown_function	PFIT_0719200.1-p1conserved_Plasmodium_membrane_protein__unknown_function	{'EKNEKNE', 'DKNEKNE', 'DKNDKND', 'DNNDKND', 'NDKNDKN', 'HEKNEKN|KEKNEKN', 'DKNDKNE', 'NDKNEKN', 'EKHEKNE|EKKEKNE', 'KNDKNEK', 'KHEKNEK|KKEKNEK', 'NEKNEKN', 'KNEKNEK', 'NEKNEKH|NEKNEKK', 'NNDKNDK', 'KNDKNDK'}
PF3D7_0721000.1-p1conserved_Plasmodium_membrane_protein__unknown_function	PFIT_1143800.1-p1transcription_factor_with_AP2_domain(s)	{'EKNEKNE', 'KNEKNEK', 'NEKNEKN'}
PF3D7_0721000.1-p1conserved_Plasmodium_membrane_protein__unknown_function	PF3D7_1218900.1-p1conserved_Plasmodium_protein__unknown_function	{'EKNEKNE', 'KNEKNEK', 'NEKNEKN'}
PF3D7_0721000.1-p1conserved_Plasmodium_membrane_protein__unknown_function	PF3D7_1231600.1-p1pre-mRNA-splicing_factor_ATP-dependent_RNA_helicase_PRP2__putative	{'NDKNEKN', 'KNDKNEK', 'KNDKNDK', 'NEKNEKN', 'KNEKNEK', 'NNDKNDK', 'NDKNDKN'}
PF3D7_0721000.1-p1conserved_Plasmodium_membrane_protein__unknown_function	PF3D7_1143100.1-p1AP2_domain_transcription_factor_AP2-O__putative	{'EKNEKNE', 'KNEKNEK', 'NEKNEKN'}
PF3D7_0721000.1-p1conserved_Plasmodium_membrane_protein__unknown_function	PF3D7_1017600.1-p1conserved_Plasmodium_protein__unknown_function	{'EKNEKNE', 'NEKNEKN'}
PF3D7_0721000.1-p1conserved_Plasmodium_membrane_protein__unknown_function	PFIT_0111800.1-p1Plasmodium_exported_protein__unknown_function	{'EKNEKNE', 'KNEKNEK', 'NEKNEKN'}
PF3D7_0516000.1-p1RAP_protein__putative	PFIT_0405500.1-p1conserved_Plasmodium_protein__unknown_function	{'KNEKNEK', 'NEKNEKN'}
PF3D7_0319700.1-p1ABC_transporter_I_family_member_1__putative	PFIT_0405500.1-p1conserved_Plasmodium_protein__unknown_function	{'NEKNEKN'}
PFIT_0405500.1-p1conserved_Plasmodium_protein__unknown_function	PFIT_0719200.1-p1conserved_Plasmodium_membrane_protein__unknown_function	{'KNEKNEK', 'NEKNEKN'}
PFIT_0405500.1-p1conserved_Plasmodium_protein__unknown_function	PFIT_1143800.1-p1transcription_factor_with_AP2_domain(s)	{'KNEKNEK', 'NEKNEKN'}
PF3D7_1218900.1-p1conserved_Plasmodium_protein__unknown_function	PFIT_0405500.1-p1conserved_Plasmodium_protein__unknown_function	{'KNEKNEK', 'NEKNEKN'}
PF3D7_1231600.1-p1pre-mRNA-splicing_factor_ATP-dependent_RNA_helicase_PRP2__putative	PFIT_0405500.1-p1conserved_Plasmodium_protein__unknown_function	{'KNEKNEK', 'NEKNEKN'}
PF3D7_1143100.1-p1AP2_domain_transcription_factor_AP2-O__putative	PFIT_0405500.1-p1conserved_Plasmodium_protein__unknown_function	{'KNEKNEK', 'NEKNEKN'}
PF3D7_1017600.1-p1conserved_Plasmodium_protein__unknown_function	PFIT_0405500.1-p1conserved_Plasmodium_protein__unknown_function	{'NEKNEKN'}
PFIT_0111800.1-p1Plasmodium_exported_protein__unknown_function	PFIT_0405500.1-p1conserved_Plasmodium_protein__unknown_function	{'KNEKNEK', 'NEKNEKN'}
PF3D7_0319700.1-p1ABC_transporter_I_family_member_1__putative	PF3D7_0516000.1-p1RAP_protein__putative	{'NGKNEKN', 'NEKNEKN'}
PF3D7_0516000.1-p1RAP_protein__putative	PFIT_0719200.1-p1conserved_Plasmodium_membrane_protein__unknown_function	{'EKNEKNE', 'KNEKNEK', 'NEKNEKN'}
PF3D7_0516000.1-p1RAP_protein__putative	PFIT_1143800.1-p1transcription_factor_with_AP2_domain(s)	{'EKNEKNE', 'KNEKNEK', 'NEKNEKN'}
PF3D7_0516000.1-p1RAP_protein__putative	PF3D7_1218900.1-p1conserved_Plasmodium_protein__unknown_function	{'EKNEKNE', 'KNEKNEK', 'NEKNEKN'}
PF3D7_0516000.1-p1RAP_protein__putative	PF3D7_1231600.1-p1pre-mRNA-splicing_factor_ATP-dependent_RNA_helicase_PRP2__putative	{'KNEKNEK', 'NEKNEKN'}
PF3D7_0516000.1-p1RAP_protein__putative	PF3D7_1143100.1-p1AP2_domain_transcription_factor_AP2-O__putative	{'EKNEKNE', 'KNEKNEK', 'NEKNEKN'}
PF3D7_0516000.1-p1RAP_protein__putative	PF3D7_1017600.1-p1conserved_Plasmodium_protein__unknown_function	{'EKNEKNE', 'NEKNEKN'}
PF3D7_0516000.1-p1RAP_protein__putative	PFIT_0111800.1-p1Plasmodium_exported_protein__unknown_function	{'EKNEKNE', 'KNEKNEK', 'NEKNEKN'}
PF3D7_0319700.1-p1ABC_transporter_I_family_member_1__putative	PFIT_0719200.1-p1conserved_Plasmodium_membrane_protein__unknown_function	{'NEKNEKN'}
PF3D7_0319700.1-p1ABC_transporter_I_family_member_1__putative	PFIT_1143800.1-p1transcription_factor_with_AP2_domain(s)	{'NEKNEKN'}
PF3D7_0319700.1-p1ABC_transporter_I_family_member_1__putative	PF3D7_1218900.1-p1conserved_Plasmodium_protein__unknown_function	{'NEKNEKN'}
PF3D7_0319700.1-p1ABC_transporter_I_family_member_1__putative	PF3D7_1231600.1-p1pre-mRNA-splicing_factor_ATP-dependent_RNA_helicase_PRP2__putative	{'NEKNEKN'}
PF3D7_0319700.1-p1ABC_transporter_I_family_member_1__putative	PF3D7_1143100.1-p1AP2_domain_transcription_factor_AP2-O__putative	{'NEKNEKN'}
PF3D7_0319700.1-p1ABC_transporter_I_family_member_1__putative	PF3D7_1017600.1-p1conserved_Plasmodium_protein__unknown_function	{'NEKNEKN'}
PF3D7_0319700.1-p1ABC_transporter_I_family_member_1__putative	PFIT_0111800.1-p1Plasmodium_exported_protein__unknown_function	{'NEKNEKN'}
PFIT_0719200.1-p1conserved_Plasmodium_membrane_protein__unknown_function	PFIT_1143800.1-p1transcription_factor_with_AP2_domain(s)	{'EKNEKNE', 'KNEKNEK', 'NEKNEKN'}
PF3D7_1218900.1-p1conserved_Plasmodium_protein__unknown_function	PFIT_0719200.1-p1conserved_Plasmodium_membrane_protein__unknown_function	{'EKNEKNE', 'KNEKNEK', 'NEKNEKN'}
PF3D7_1231600.1-p1pre-mRNA-splicing_factor_ATP-dependent_RNA_helicase_PRP2__putative	PFIT_0719200.1-p1conserved_Plasmodium_membrane_protein__unknown_function	{'NDKNEKN', 'KNDKNEK', 'KNDKNDK', 'NEKNEKN', 'KNEKNEK', 'NNDKNDK', 'NDKNDKN'}
PF3D7_1143100.1-p1AP2_domain_transcription_factor_AP2-O__putative	PFIT_0719200.1-p1conserved_Plasmodium_membrane_protein__unknown_function	{'EKNEKNE', 'KNEKNEK', 'NEKNEKN'}
PF3D7_1017600.1-p1conserved_Plasmodium_protein__unknown_function	PFIT_0719200.1-p1conserved_Plasmodium_membrane_protein__unknown_function	{'EKNEKNE', 'NEKNEKN'}
PFIT_0111800.1-p1Plasmodium_exported_protein__unknown_function	PFIT_0719200.1-p1conserved_Plasmodium_membrane_protein__unknown_function	{'EKNEKNE', 'KNEKNEK', 'NEKNEKN'}
PF3D7_1218900.1-p1conserved_Plasmodium_protein__unknown_function	PFIT_1143800.1-p1transcription_factor_with_AP2_domain(s)	{'EKNEKNE', 'KNEKNEK', 'NEKNEKN'}
PF3D7_1231600.1-p1pre-mRNA-splicing_factor_ATP-dependent_RNA_helicase_PRP2__putative	PFIT_1143800.1-p1transcription_factor_with_AP2_domain(s)	{'KNEKNEK', 'NEKNEKN'}
PF3D7_1143100.1-p1AP2_domain_transcription_factor_AP2-O__putative	PFIT_1143800.1-p1transcription_factor_with_AP2_domain(s)	{'EKNEKNE', 'NEKNMKN', 'MKNMKNI', 'EKNEKNM', 'ENEKNEK', 'KNEKNEK', 'EKNMKNM', 'NEKNEKN', 'KNEKNMK', 'MKNIKND'}
PF3D7_1017600.1-p1conserved_Plasmodium_protein__unknown_function	PFIT_1143800.1-p1transcription_factor_with_AP2_domain(s)	{'EKNEKNE', 'ENEKNEK', 'NEKNEKN'}
PFIT_0111800.1-p1Plasmodium_exported_protein__unknown_function	PFIT_1143800.1-p1transcription_factor_with_AP2_domain(s)	{'EKNEKNE', 'KNEKNEK', 'NEKNEKN'}
PF3D7_1218900.1-p1conserved_Plasmodium_protein__unknown_function	PF3D7_1231600.1-p1pre-mRNA-splicing_factor_ATP-dependent_RNA_helicase_PRP2__putative	{'KNEKNEK', 'NEKNEKN'}
PF3D7_1143100.1-p1AP2_domain_transcription_factor_AP2-O__putative	PF3D7_1218900.1-p1conserved_Plasmodium_protein__unknown_function	{'EKNEKNE', 'KNEKNEK', 'NEKNEKN'}
PF3D7_1017600.1-p1conserved_Plasmodium_protein__unknown_function	PF3D7_1218900.1-p1conserved_Plasmodium_protein__unknown_function	{'EKNEKNE', 'NEKNEKN'}
PF3D7_1218900.1-p1conserved_Plasmodium_protein__unknown_function	PFIT_0111800.1-p1Plasmodium_exported_protein__unknown_function	{'EKNEKNE', 'KNEKNEK', 'NEKNEKN'}
PF3D7_1143100.1-p1AP2_domain_transcription_factor_AP2-O__putative	PF3D7_1231600.1-p1pre-mRNA-splicing_factor_ATP-dependent_RNA_helicase_PRP2__putative	{'KNEKNEK', 'NEKNEKN'}
PF3D7_1017600.1-p1conserved_Plasmodium_protein__unknown_function	PF3D7_1231600.1-p1pre-mRNA-splicing_factor_ATP-dependent_RNA_helicase_PRP2__putative	{'NEKNEKN'}
PF3D7_1231600.1-p1pre-mRNA-splicing_factor_ATP-dependent_RNA_helicase_PRP2__putative	PFIT_0111800.1-p1Plasmodium_exported_protein__unknown_function	{'KNEKNEK', 'NEKNEKN'}
PF3D7_1017600.1-p1conserved_Plasmodium_protein__unknown_function	PF3D7_1143100.1-p1AP2_domain_transcription_factor_AP2-O__putative	{'EKNEKNE', 'ENEKNEK', 'NEKNEKN'}
PF3D7_1143100.1-p1AP2_domain_transcription_factor_AP2-O__putative	PFIT_0111800.1-p1Plasmodium_exported_protein__unknown_function	{'EKNEKNE', 'KNEKNEK', 'NEKNEKN'}
PF3D7_1017600.1-p1conserved_Plasmodium_protein__unknown_function	PFIT_0111800.1-p1Plasmodium_exported_protein__unknown_function	{'EKNEKNE', 'NEKNEKN'}
PF3D7_1335300.1-p1reticulocyte_binding_protein_2_homologue_b	PF3D7_1335400.1-p1reticulocyte_binding_protein_2_homologue_a	{'EREKQEQ', 'ALKKQEQ|ALKRQEQ', 'KQEQLKK', 'ERERLEK', 'RLEREKQ', 'QLQKEEE', 'ELKRQEQ', 'EKQEQLQ', 'GDEKLIL', 'NELLSHN', 'KQEKERL', 'KQEEERK', 'KEKQEKE', 'EEERKER', 'EEEERKE', 'LKRQEQE', 'QQQKEEA', 'ERLEREK', 'KEEELRK', 'QQKEEAL', 'DEKLILK', 'KLILKEE', 'KQEQLQK', 'EALKRQE', 'QEQERLQ', 'EQERLQK', 'EALKKQE|EALKRQE', 'LILKEEE', 'RERLEKA', 'EKEKQEK', 'QEKERLE', 'RERIEKE', 'IEKEKQE', 'IKDLGDE', 'EKERLER…
PF3D7_1301200.1-p1glycophorin_binding_protein	PF3D7_1401000.1-p1glycophorin_binding_protein	{'NVLYQIL', 'DPEYRKH', 'ADPEYRK', 'EYRKHVN', 'IMKAWAA|IMKAYAA', 'AWAADPE|AYAADPE', 'KAWAADP|KAYAADP', 'TSADPEG', 'KHVNVLY', 'SADPEGQ', 'QIMKAWA|QIMKAYA', 'HVNVLYQ', 'PEGQIMK|PEGQIMR', 'VNVLYQI', 'PEYRKHV', 'AADPEYR', 'MKAWAAD|MKAYAAD', 'TNTDPND', 'NTDPNDD|NTDPNDE', 'GQIMKAW|GQIMKAY', 'EGQIMKA', 'WAADPEY|YAADPEY', 'ETSADPE', 'ILTNTDP', 'RKHVNVL', 'PEGQIMK', 'DPEGQIM', 'LTNTDPN', 'YRKHVNV', 'ADPEGQ…
PF3D7_1342900.1-p1AP2_domain_transcription_factor__putative	PFIT_1342100.1-p1transcription_factor_with_AP2_domain(s)	{'ENIMSGE', 'MSGENIM', 'IMSGENI', 'NGDNKMN', 'NIMSGEN', 'NKMNGDN|NKMNGEN', 'NIMSGDN|NIMSGEN', 'YNEQNEQ', 'MNGDNKM', 'ENIMSGD|ENIMSGE', 'GDNKMNG', 'GENIMSG', 'DNKMNGD|DNKMNGE'}
PF3D7_0715200.1-p1conserved_Plasmodium_protein__unknown_function	PFIT_0713300.1-p1conserved_Plasmodium_protein__unknown_function	{'IKEDIIK', 'KENVKED', 'DIIKEDV', 'EDIIEED', 'IKEDVKE', 'EDVKEDI', 'IIKENVK', 'ENVKEDI', 'KEDIIKE', 'VKEDIIE', 'EDIIKEN|EDIVKEN', 'IIEEDIK', 'KEDIIEE', 'EDIIKEN', 'KENLKED|KENVKED', 'NVKEDII', 'KEDVKED', 'IKENVKE', 'IIKEDVK', 'VKEDIIK', 'EDIIKED', 'IEEDIKE', 'DIIKENV', 'DIKEDII', 'DVKEDII'}
PF3D7_0505700.1-p1conserved_Plasmodium_membrane_protein__unknown_function	PF3D7_0801000.1-p1Plasmodium_exported_protein_(PHISTc)__unknown_function	{'DERNQNV'}
PF3D7_1125700.1-p1kelch_domain-containing_protein__putative	PFIT_0805900.1-p1conserved_Plasmodium_protein__unknown_function	{'EIIKNDE', 'DEIIKND'}
PF3D7_0803100.1-p1U3_small_nucleolar_RNA-associated_protein_14__putative	PF3D7_1125700.1-p1kelch_domain-containing_protein__putative	{'EIIKNDE', 'DEIIKND'}
PF3D7_0803100.1-p1U3_small_nucleolar_RNA-associated_protein_14__putative	PFIT_0805900.1-p1conserved_Plasmodium_protein__unknown_function	{'DEDNNNK', 'KKNMDNT|RKNMDNT', 'KYNVDED', 'EDNNNKY', 'EIIKNDE', 'YNVDEDN', 'NKYNVDE', 'NNNKYNV', 'DEIIKND', 'DNNNKYN', 'NVDEDNN', 'NNKYNVD', 'VDEDNNN'}
PF3D7_0322700.1-p1conserved_Plasmodium_protein__unknown_function	PFIT_0322800.1-p1conserved_Plasmodium_protein__unknown_function	{'QNLQNVQ', 'NGNMQNL', 'NLQNVQN', 'GNMQNLQ', 'YINGNMQ', 'VQNVQNV', 'INGNMQN', 'NVQNVQN', 'NMQNLQN', 'NDNVDNI', 'QNVQNVQ', 'MQNLQNV'}
PF3D7_1123500.1-p1conserved_Plasmodium_protein__unknown_function	PF3D7_1208500.1-p1conserved_Plasmodium_protein__unknown_function	{'GSINSSL|GTINSSL'}
PF3D7_0201900.1-p1erythrocyte_membrane_protein_3	PF3D7_0420000.1-p1zinc_finger_protein__putative	{'DLKNTPN|DLKQTPN'}
PF3D7_1021900.1-p1PHAX_domain-containing_protein__putative	PFIT_1021400.1-p1conserved_Plasmodium_protein_(10b_antigen)__unknown_function	{'NQMNNNT', 'NDNQMNN', 'QMNNNTK', 'DNQMNNN', 'NNQLNNN', 'MNNNTKN', 'INNNIKN|LNNNIKN', 'TNDNQMN', 'NNNKLNN'}
PF3D7_0709300.1-p1Cg2_protein__putative	PFIT_1021400.1-p1conserved_Plasmodium_protein_(10b_antigen)__unknown_function	{'INNNIKN|LNNNIKN'}
PFIT_1021400.1-p1conserved_Plasmodium_protein_(10b_antigen)__unknown_function	PFIT_1359000.1-p1conserved_Plasmodium_membrane_protein__unknown_function	{'INNNIKN|LNNNIKN'}
PF3D7_0709300.1-p1Cg2_protein__putative	PF3D7_1021900.1-p1PHAX_domain-containing_protein__putative	{'INNNIKN|LNNNIKN'}
PF3D7_1021900.1-p1PHAX_domain-containing_protein__putative	PFIT_1359000.1-p1conserved_Plasmodium_membrane_protein__unknown_function	{'INNNIKN|LNNNIKN'}
PF3D7_0709300.1-p1Cg2_protein__putative	PFIT_1359000.1-p1conserved_Plasmodium_membrane_protein__unknown_function	{'INNNIKN|LNNNIKN'}
rifin	var	{'IQNDAIP|IQNDGIP', 'DIQSDAI|DIQSDGI', 'DIQSDDI', 'IQSDAIP|IQSDGIP', 'DIQNDAI|DIQNDGI', 'AKDAAEK|AKEAAEK', 'IQSDGIP', 'IQSDDIP', 'QSDDIPS|QSDDIPT', 'DIQSDGI'}
PF3D7_0507800.1-p1conserved_Plasmodium_protein__unknown_function	PF3D7_0722200.1-p1rhoptry-associated_leucine_zipper-like_protein_1	{'DNKNGDD', 'NGDDNKN', 'DDNKNGD', 'KNGDDNK', 'GDDNKNG'}
PF3D7_1035900.1-p1probable_protein__unknown_function	PF3D7_1038400.1-p1gametocyte-specific_protein	{'PEEVVEE', 'VPEEVVE', 'PEEIAEE|PEEVAEE', 'IEEVVEE', 'VAEELIE', 'EELIEKV', 'EVIEEVV', 'EVTEELI|EVTEEVI', 'EEVIEEV', 'EEVAEEV', 'EELVEKV', 'PEEVAEE', 'EKVLEEV', 'VTEELIE', 'KVLEEVI', 'EKVVEEE', 'EVAEEVV', 'VAEELVE', 'EEVVEEV'}
PF3D7_0317700.1-p1CPSF_(cleavage_and_polyadenylation_specific_factor)__subunit_A__putative	PF3D7_0507800.1-p1conserved_Plasmodium_protein__unknown_function	{'DDNKNGD'}
PF3D7_0317700.1-p1CPSF_(cleavage_and_polyadenylation_specific_factor)__subunit_A__putative	PF3D7_0722200.1-p1rhoptry-associated_leucine_zipper-like_protein_1	{'DDNKNGD'}
PF3D7_0202000.1-p1knob-associated_histidine-rich_protein	var	{'NKEKTNN|NKEKTQN'}
PF3D7_1330800.1-p1RNA-binding_protein__putative	PFIT_0914400.1-p1met-10+_like_protein__putative	{'KNENKNE'}
PF3D7_0212100.1-p1conserved_Plasmodium_protein__unknown_function	PFIT_0914400.1-p1met-10+_like_protein__putative	{'KNENKNE'}
PFIT_0211500.1-p1conserved_Plasmodium_protein__unknown_function	PFIT_0914400.1-p1met-10+_like_protein__putative	{'KNENKNE'}
PF3D7_0212100.1-p1conserved_Plasmodium_protein__unknown_function	PF3D7_1330800.1-p1RNA-binding_protein__putative	{'KNENKNE'}
PF3D7_1330800.1-p1RNA-binding_protein__putative	PFIT_0211500.1-p1conserved_Plasmodium_protein__unknown_function	{'KNENKNE'}
PF3D7_0212100.1-p1conserved_Plasmodium_protein__unknown_function	PFIT_0211500.1-p1conserved_Plasmodium_protein__unknown_function	{'KNENKNE'}
PF3D7_1149000.1-p1antigen_332__DBL-like_protein	PFIT_0727500.1-p1zinc_finger__C3HC4_type__putative	{'KNVSEEI', 'EKNVSEE'}
PF3D7_1019700.1-p1conserved_Plasmodium_protein__unknown_function	var	{'GDNNKKD|GDNNKKE'}
PF3D7_0220000.1-p1liver_stage_antigen_3	PFIT_0723100.1-p1kinesin-19__putative	{'IEEDVEE', 'EEDIEED', 'DVEEDIE', 'DIEEDVE', 'EDVEEDI', 'EDIEEDV', 'VEEDIEE', 'EEDVEED'}
PF3D7_0500800.1-p1mature_parasite-infected_erythrocyte_surface_antigen	PF3D7_1016300.1-p1glycophorin_binding_protein	{'VKKVIKK'}
PF3D7_1321100.1-p1conserved_Plasmodium_protein__unknown_function	PF3D7_1456000.1-p1AP2_domain_transcription_factor__putative	{'NNNNKKN', 'KNNNNKK|KNQNNKK', 'KNNNNKK'}
PF3D7_0108300.1-p1conserved_Plasmodium_protein__unknown_function	PF3D7_1321100.1-p1conserved_Plasmodium_protein__unknown_function	{'KKNNNNK', 'KNNNNKK|KNQNNKK', 'KNNNNKK'}
PF3D7_1106700.1-p1DNA_replication_ATP-dependent_helicase/nuclease_DNA2__putative	PF3D7_1321100.1-p1conserved_Plasmodium_protein__unknown_function	{'NNNNKKN', 'KNNNNKK|KNQNNKK', 'KNNNNKK'}
PF3D7_0513200.1-p1conserved_Plasmodium_protein__unknown_function	PF3D7_1321100.1-p1conserved_Plasmodium_protein__unknown_function	{'KKNNNNK', 'KNNNNKK|KNQNNKK', 'KNNNNKK'}
PF3D7_0110100.1-p1selenocysteine-specific_elongation_factor_selB_homologue__putative	PF3D7_1321100.1-p1conserved_Plasmodium_protein__unknown_function	{'NKKNNNN', 'KNNNNKK|KNQNNKK', 'NNNNKKN', 'KNNNNKK', 'KKNNNNK'}
PF3D7_1033000.1-p1conserved_Plasmodium_protein__unknown_function	PF3D7_1321100.1-p1conserved_Plasmodium_protein__unknown_function	{'NKKNNNN', 'KNNNNKK|KNQNNKK', 'NNNNKKN', 'NNNKKNN', 'KNNNNKK', 'NNKKNNN', 'KKNNNNK'}
PF3D7_0108300.1-p1conserved_Plasmodium_protein__unknown_function	PF3D7_1456000.1-p1AP2_domain_transcription_factor__putative	{'KNNNNKK|KNQNNKK', 'KNNNNKK'}
PF3D7_1106700.1-p1DNA_replication_ATP-dependent_helicase/nuclease_DNA2__putative	PF3D7_1456000.1-p1AP2_domain_transcription_factor__putative	{'NKNNNNK', 'NNNNKKN', 'KNNNNKK|KNQNNKK', 'KNNNNKK'}
PF3D7_0513200.1-p1conserved_Plasmodium_protein__unknown_function	PF3D7_1456000.1-p1AP2_domain_transcription_factor__putative	{'KNNNNKK|KNQNNKK', 'KNNNNKK'}
PF3D7_0110100.1-p1selenocysteine-specific_elongation_factor_selB_homologue__putative	PF3D7_1456000.1-p1AP2_domain_transcription_factor__putative	{'NNNNKKN', 'KNNNNKK|KNQNNKK', 'KNNNNKK'}
PF3D7_1033000.1-p1conserved_Plasmodium_protein__unknown_function	PF3D7_1456000.1-p1AP2_domain_transcription_factor__putative	{'NNNNKKN', 'KNNNNKK|KNQNNKK', 'KNNNNKK'}
PF3D7_0108300.1-p1conserved_Plasmodium_protein__unknown_function	PF3D7_1106700.1-p1DNA_replication_ATP-dependent_helicase/nuclease_DNA2__putative	{'KNNNNKK|KNQNNKK', 'KNNNNKK'}
PF3D7_0108300.1-p1conserved_Plasmodium_protein__unknown_function	PF3D7_0513200.1-p1conserved_Plasmodium_protein__unknown_function	{'KKNNNNK', 'KNNNNKK|KNQNNKK', 'KNNNNKK'}
[truncated: 1,332 more rows]

## Sheet: Motifs with only NQEDRK removed
List of inter-protein motifs shared between a pair of proteins. Motifs reported here are 7-mers with at least 5 identical amino acids and upto two conservative substitutions (and no wildcards). Motifs with only NQEDRK (only amide and charged residues) not shown here.
[truncated: 547 more rows]
